# Supplementary material for: The RNA-Binding Protein hnRNP K Mediates the Effect of BDNF on Dendritic mRNA Metabolism and Regulates Synaptic NMDA Receptors in Hippocampal Neurons
Source: PubMed Central journal article supplement (PMC5732018; doi:10.1523/eneuro.0268-17.2017), 2017-12-12
Supplement: sup_enu-eN-NWR-0268-17-s04.pdf [file sup_enu-eN-NWR-0268-17-s04.pdf]

**Table 1-1 - hnRNP K co-immunoprecipitated transcripts**

| <b>Gene Symbol</b> | <b>Description</b>                                                                                                            | <b>Fold change</b> |
|--------------------|-------------------------------------------------------------------------------------------------------------------------------|--------------------|
| LOC290876          | Rattus norvegicus similar to RIKEN cDNA 1700029H14 (LOC290876), mRNA [NM_001037182]                                           | <b>468,618</b>     |
| Lmx1b              | Homeodomain protein LMX1b [Source:UniProtKB/TrEMBL;Acc:Q811V1] [ENSRNOT00000022953]                                           | <b>330,314</b>     |
| 0                  | Unknown                                                                                                                       | <b>212,281</b>     |
| Sod3               | Rattus norvegicus superoxide dismutase 3, extracellular (Sod3), mRNA [NM_012880]                                              | <b>197,456</b>     |
| Kcnc3              | Rattus norvegicus mRNA sequence. [M84210]                                                                                     | <b>194,736</b>     |
| Ctnnd1             | Rattus norvegicus catenin (cadherin associated protein), delta 1 (Ctnnd1), mRNA [NM_001107740]                                | <b>188,589</b>     |
| Pcdhgc5            | Rattus norvegicus protocadherin gamma c5 (Pcdhgc5), mRNA [NM_001164288]                                                       | <b>187,617</b>     |
| LOC688314          | PREDICTED: Rattus norvegicus similar to stimulated by retinoic acid 13 (LOC688314), mRNA [XM_001081840]                       | <b>170,099</b>     |
| Antxr1             | Rattus norvegicus anthrax toxin receptor 1 (Antxr1), mRNA [NM_001044249]                                                      | <b>169,160</b>     |
| Hspb6              | Rattus norvegicus heat shock protein, alpha-crystallin-related, B6 (Hspb6), mRNA [NM_138887]                                  | <b>169,062</b>     |
| Iglon5             | PREDICTED: Rattus norvegicus IgLON family member 5 (Iglon5), mRNA [XM_218634]                                                 | <b>168,063</b>     |
| 0                  | Unknown                                                                                                                       | <b>160,431</b>     |
| Nrgn               | Rattus norvegicus neurogranin (Nrgn), mRNA [NM_024140]                                                                        | <b>158,519</b>     |
| RGD1561016         | Uncharacterized protein [Source:UniProtKB/TrEMBL;Acc:D3ZDR7] [ENSRNOT00000017340]                                             | <b>153,143</b>     |
| RGD1564163         | Rattus norvegicus similar to RIKEN cDNA 1700025K23 (RGD1564163), mRNA [NM_001109266]                                          | <b>152,681</b>     |
| 0                  | Rattus norvegicus TL0AEA67YN06 mRNA sequence. [FQ231880]                                                                      | <b>149,071</b>     |
| Gpr3711            | Rattus norvegicus G protein-coupled receptor 37-like 1 (Gpr3711), mRNA [NM_145784]                                            | <b>148,764</b>     |
| Nlgn3              | Rattus norvegicus neuroligin 3 (Nlgn3), mRNA [NM_134336]                                                                      | <b>147,096</b>     |
| Gatc               | Rattus norvegicus glutamyl-tRNA(Gln) amidotransferase, subunit C homolog (bacterial) (Gatc), mRNA [NM_001108339]              | <b>138,415</b>     |
| Gstm7              | Rattus norvegicus glutathione S-transferase, mu 7 (Gstm7), mRNA [NM_031154]                                                   | <b>136,907</b>     |
| Gm2a               | Rattus norvegicus GM2 ganglioside activator (Gm2a), mRNA [NM_172335]                                                          | <b>135,988</b>     |
| Slc9a3r1           | Rattus norvegicus solute carrier family 9 (sodium/hydrogen exchanger), member 3 regulator 1 (Slc9a3r1), mRNA [NM_021594]      | <b>134,266</b>     |
| Slc13a3            | Rattus norvegicus solute carrier family 13 (sodium-dependent dicarboxylate transporter), member 3 (Slc13a3), mRNA [NM_022866] | <b>132,498</b>     |
| Tcf3               | Rattus norvegicus transcription factor 3 (Tcf3), mRNA [NM_001107865]                                                          | <b>129,071</b>     |
| Prrt1              | Rattus norvegicus proline-rich transmembrane protein 1 (Prrt1), mRNA [NM_001032285]                                           | <b>128,651</b>     |
| Ocln               | Rattus norvegicus occludin (Ocln), mRNA [NM_031329]                                                                           | <b>127,667</b>     |
| Znf575             | Rattus norvegicus zinc finger protein 575 (Znf575), mRNA [NM_001107489]                                                       | <b>126,828</b>     |
| Syn1               | Rattus norvegicus synapsin I (Syn1), transcript variant a, mRNA [NM_019133]                                                   | <b>125,695</b>     |
| Lrrc8a             | Rattus norvegicus leucine rich repeat containing 8 family, member A (Lrrc8a), mRNA [NM_001024782]                             | <b>124,763</b>     |
| Dpysl5             | Rattus norvegicus dihydropyrimidinase-like 5 (Dpysl5), mRNA [NM_023023]                                                       | <b>124,181</b>     |

|         |                                                                                                                                  |         |
|---------|----------------------------------------------------------------------------------------------------------------------------------|---------|
| Cldnd1  | Rattus norvegicus claudin domain containing 1 (Cldnd1), mRNA [NM_001006955]                                                      | 122,625 |
| Ncam1   | Rattus norvegicus neural cell adhesion molecule 1 (Ncam1), mRNA [NM_031521]                                                      | 122,287 |
| Bcan    | Rattus norvegicus brevican (Bcan), transcript variant 2, mRNA [NM_012916]                                                        | 121,479 |
| Tbx6    | Rattus norvegicus T-box 6 (Tbx6), mRNA [NM_001108920]                                                                            | 120,419 |
| Vangl2  | Rattus norvegicus vang-like 2 (van gogh, Drosophila) (Vangl2), mRNA [NM_001105969]                                               | 120,172 |
| 0       | Unknown                                                                                                                          | 118,895 |
| Ly6e    | Rattus norvegicus lymphocyte antigen 6 complex, locus E (Ly6e), mRNA [NM_001017467]                                              | 118,666 |
| Eln     | Rattus norvegicus elastin (Eln), mRNA [NM_012722]                                                                                | 117,300 |
| Clip3   | Rattus norvegicus CAP-GLY domain containing linker protein 3 (Clip3), mRNA [NM_001107501]                                        | 116,712 |
| Apba1   | Rattus norvegicus amyloid beta (A4) precursor protein-binding, family A, member 1 (Apba1), mRNA [NM_031779]                      | 116,398 |
| Sepp1   | Rattus norvegicus selenoprotein P, plasma, 1 (Sepp1), transcript variant 2, mRNA [NM_001083911]                                  | 116,206 |
| Olr857  | Rattus norvegicus olfactory receptor 857 (Olr857), mRNA [NM_001000583]                                                           | 113,176 |
| Fam163b | Rattus norvegicus family with sequence similarity 163, member B (Fam163b), mRNA [NM_001109458]                                   | 113,048 |
| Ppap2b  | Rattus norvegicus phosphatidic acid phosphatase type 2B (Ppap2b), mRNA [NM_138905]                                               | 110,887 |
| Ina     | Rattus norvegicus internexin neuronal intermediate filament protein, alpha (Ina), mRNA [NM_019128]                               | 110,483 |
| Uba1    | Rattus norvegicus ubiquitin-like modifier activating enzyme 1 (Uba1), mRNA [NM_001014080]                                        | 109,022 |
| Dlg4    | Rattus norvegicus discs, large homolog 4 (Drosophila) (Dlg4), mRNA [NM_019621]                                                   | 108,950 |
| Fa2h    | Rattus norvegicus fatty acid 2-hydroxylase (Fa2h), mRNA [NM_001135583]                                                           | 108,842 |
| Kcnc3   | Rattus norvegicus potassium voltage gated channel, Shaw-related subfamily, member 3 (Kcnc3), mRNA [NM_053997]                    | 107,429 |
| Nnat    | Rattus norvegicus neuronatin (Nnat), transcript variant 1, mRNA [NM_053601]                                                      | 106,863 |
| Aes     | Rattus norvegicus amino-terminal enhancer of split (Aes), mRNA [NM_019220]                                                       | 106,196 |
| Mrpl52  | Rattus norvegicus mitochondrial ribosomal protein L52 (Mrpl52), nuclear gene encoding mitochondrial protein, mRNA [NM_001108375] | 105,588 |
| 0       | Unknown                                                                                                                          | 104,046 |
| Prrt1   | Rattus norvegicus proline-rich transmembrane protein 1 (Prrt1), mRNA [NM_001032285]                                              | 103,917 |
| Wbp2    | Rattus norvegicus WW domain binding protein 2 (Wbp2), mRNA [NM_138975]                                                           | 103,817 |
| Ntrk2   | Rattus norvegicus neurotrophic tyrosine kinase, receptor, type 2 (Ntrk2), transcript variant 2, mRNA [NM_001163168]              | 103,273 |
| Stk32b  | Rattus norvegicus serine/threonine kinase 32B (Stk32b), mRNA [NM_001107224]                                                      | 101,830 |
| Zmat2   | Rattus norvegicus zinc finger, matrin type 2 (Zmat2), mRNA [NM_001135582]                                                        | 101,750 |
| Eny2    | Rattus norvegicus enhancer of yellow 2 homolog (Drosophila) (Eny2), mRNA [NM_001130580]                                          | 101,561 |
| Dynlrb1 | Rattus norvegicus dynein light chain roadblock-type 1 (Dynlrb1), mRNA [NM_131910]                                                | 101,527 |
| Mon1b   | Rattus norvegicus MON1 homolog b (yeast) (Mon1b), mRNA [NM_001107433]                                                            | 100,633 |
| Prkaca  | Rattus norvegicus protein kinase, cAMP-dependent, catalytic, alpha (Prkaca), mRNA [NM_001100922]                                 | 99,762  |
| Elmo1   | Rattus norvegicus engulfment and cell motility 1 (Elmo1), mRNA [NM_001108415]                                                    | 99,642  |
| Sipa1l3 | Rattus norvegicus signal-induced proliferation-associated 1 like 3 (Sipa1l3), mRNA [NM_001013066]                                | 99,295  |

|              |                                                                                                                                                      |               |
|--------------|------------------------------------------------------------------------------------------------------------------------------------------------------|---------------|
| Rab23        | Rattus norvegicus RAB23, member RAS oncogene family (Rab23), mRNA [NM_001109005]                                                                     | <b>99,288</b> |
| Accn2        | Rattus norvegicus amiloride-sensitive cation channel 2, neuronal (Accn2), mRNA [NM_024154]                                                           | <b>98,677</b> |
| LOC306766    | Rattus norvegicus hypothetical LOC306766 (LOC306766), mRNA [NM_001014007]                                                                            | <b>98,595</b> |
| Zfp398       | Rattus norvegicus zinc finger protein 398 (Zfp398), mRNA [NM_001109230]                                                                              | <b>98,298</b> |
| Ccnk         | Rattus norvegicus cyclin K (Ccnk), mRNA [NM_001109672]                                                                                               | <b>98,278</b> |
| RGD1565095   | Rattus norvegicus similar to hypothetical protein MGC52110 (RGD1565095), mRNA [NM_001195488]                                                         | <b>98,067</b> |
| Nptx1        | Rattus norvegicus neuronal pentraxin 1 (Nptx1), mRNA [NM_153735]                                                                                     | <b>97,874</b> |
| Scrn2        | Rattus norvegicus secernin 2 (Scrn2), mRNA [NM_001012142]                                                                                            | <b>97,427</b> |
| Fem1c        | Rattus norvegicus fem-1 homolog c (C. elegans) (Fem1c), mRNA [NM_001106932]                                                                          | <b>97,067</b> |
| RGD1565920   | PREDICTED: Rattus norvegicus similar to OTTMUSP00000000438 (RGD1565920), mRNA [XM_344713]                                                            | <b>96,552</b> |
| Coro2b       | Coro2b protein [Source:UniProtKB/TrEMBL;Acc:Q5EB67] [ENSRNOT00000020951]                                                                             | <b>96,245</b> |
| Dlc1         | Rattus norvegicus deleted in liver cancer 1 (Dlc1), mRNA [NM_001127446]                                                                              | <b>96,153</b> |
| Sox8         | Rattus norvegicus SRY (sex determining region Y)-box 8 (Sox8), mRNA [NM_001106989]                                                                   | <b>96,082</b> |
| LOC100188932 | Rattus norvegicus dolichyl-diphosphooligosaccharide--protein glycosyltransferase subunit 4 (LOC100188932), transcript variant 2, mRNA [NM_001134690] | <b>95,839</b> |
| Cxcl16       | Rattus norvegicus chemokine (C-X-C motif) ligand 16 (Cxcl16), mRNA [NM_001017478]                                                                    | <b>95,602</b> |
| Copz2        | Rattus norvegicus coatamer protein complex, subunit zeta 2 (Copz2), mRNA [NM_001108294]                                                              | <b>95,214</b> |
| Dab2         | Rattus norvegicus disabled homolog 2 (Drosophila) (Dab2), mRNA [NM_024159]                                                                           | <b>94,146</b> |
| Zbed3        | Rattus norvegicus zinc finger, BED-type containing 3 (Zbed3), mRNA [NM_001025729]                                                                    | <b>93,809</b> |
| Hspb2        | Rattus norvegicus heat shock protein beta 2 (Hspb2), mRNA [NM_130431]                                                                                | <b>93,693</b> |
| Fn3krp       | Rattus norvegicus fructosamine-3-kinase-related protein (Fn3krp), mRNA [NM_001107077]                                                                | <b>93,575</b> |
| Ctdsp1       | Rattus norvegicus CTD (carboxy-terminal domain, RNA polymerase II, polypeptide A) small phosphatase 1 (Ctdsp1), mRNA [NM_001128079]                  | <b>93,471</b> |
| RGD1308772   | Uncharacterized protein [Source:UniProtKB/TrEMBL;Acc:D3ZIN5] [ENSRNOT00000013780]                                                                    | <b>93,309</b> |
| Bcl9l        | Rattus norvegicus B-cell CLL/lymphoma 9-like (Bcl9l), mRNA [NM_001106817]                                                                            | <b>92,888</b> |
| Nrarp        | Rattus norvegicus Notch-regulated ankyrin repeat protein (Nrarp), mRNA [NM_001143750]                                                                | <b>92,119</b> |
| Bak1         | Rattus norvegicus BCL2-antagonist/killer 1 (Bak1), mRNA [NM_053812]                                                                                  | <b>92,047</b> |
| Ganc         | Rattus norvegicus glucosidase, alpha; neutral C (Ganc), mRNA [NM_001145840]                                                                          | <b>91,864</b> |
| Col6a2       | Rattus norvegicus collagen, type VI, alpha 2 (Col6a2), mRNA [NM_001100741]                                                                           | <b>91,744</b> |
| LOC689574    | Rattus norvegicus hypothetical protein LOC689574 (LOC689574), nuclear gene encoding mitochondrial protein, transcript variant 1, mRNA [NM_001195503] | <b>90,699</b> |
| Tmem69       | Rattus norvegicus transmembrane protein 69 (Tmem69), mRNA [NM_001035001]                                                                             | <b>90,639</b> |
| Paqr4        | Rattus norvegicus progestin and adipoQ receptor family member IV (Paqr4), mRNA [NM_001017377]                                                        | <b>90,260</b> |
| Tubb4        | Rattus norvegicus tubulin, beta 4 (Tubb4), mRNA [NM_080882]                                                                                          | <b>90,205</b> |
| Grif1        | PREDICTED: Rattus norvegicus glucocorticoid receptor DNA binding factor 1 (Grif1), mRNA [XM_001053554]                                               | <b>90,070</b> |

|           |                                                                                                                                                                               |               |
|-----------|-------------------------------------------------------------------------------------------------------------------------------------------------------------------------------|---------------|
| Ppp1r9b   | Rattus norvegicus protein phosphatase 1, regulatory subunit 9B (Ppp1r9b), mRNA [NM_053474]                                                                                    | <b>89,856</b> |
| Slc25a23  | Rattus norvegicus solute carrier family 25 (mitochondrial carrier; phosphate carrier), member 23 (Slc25a23), nuclear gene encoding mitochondrial protein, mRNA [NM_001106873] | <b>89,771</b> |
| Tet3      | Uncharacterized protein [Source:UniProtKB/TrEMBL;Acc:D3ZES0] [ENSRNOT00000031312]                                                                                             | <b>89,707</b> |
| Vom1r61   | Rattus norvegicus vomeronasal 1 receptor 61 (Vom1r61), mRNA [NM_001008935]                                                                                                    | <b>89,667</b> |
| Opa3      | Rattus norvegicus optic atrophy 3 (human) (Opa3), nuclear gene encoding mitochondrial protein, mRNA [NM_001107486]                                                            | <b>89,617</b> |
| LOC691024 | Rattus norvegicus similar to Protein C9orf25 homolog (LOC691024), mRNA [NM_001109616]                                                                                         | <b>89,522</b> |
| 0         | Q8VEL4_MOUSE (Q8VEL4) Dullard homolog, partial (91%) [TC579581]                                                                                                               | <b>89,371</b> |
| 0         | Rattus norvegicus similar to Spindlin homolog (Protein DXF34) (LOC367474), mRNA [XM_346153]                                                                                   | <b>89,237</b> |
| 0         | Uncharacterized protein [Source:UniProtKB/TrEMBL;Acc:D4A5I5] [ENSRNOT00000039250]                                                                                             | <b>89,137</b> |
| Sema6d    | Rattus norvegicus sema domain, transmembrane domain (TM), and cytoplasmic domain, (semaphorin) 6D (Sema6d), mRNA [NM_001107768]                                               | <b>88,268</b> |
| Rph3a     | Rattus norvegicus rabphilin 3A (Rph3a), mRNA [NM_133518]                                                                                                                      | <b>88,198</b> |
| Fam100a   | Rattus norvegicus family with sequence similarity 100, member A (Fam100a), mRNA [NM_001007668]                                                                                | <b>87,396</b> |
| Map1a     | Rattus norvegicus microtubule-associated protein 1A (Map1a), mRNA [NM_030995]                                                                                                 | <b>86,845</b> |
| LOC652956 | Rattus norvegicus p55 protein (LOC652956), mRNA [NM_001037659]                                                                                                                | <b>86,513</b> |
| Cdc7      | Rattus norvegicus cell division cycle 7 homolog (S. cerevisiae) (Cdc7), mRNA [NM_001108352]                                                                                   | <b>86,196</b> |
| Pip4k2a   | Rattus norvegicus phosphatidylinositol-5-phosphate 4-kinase, type II, alpha (Pip4k2a), mRNA [NM_053926]                                                                       | <b>86,132</b> |
| Tpp1      | Rattus norvegicus tripeptidyl peptidase I (Tpp1), mRNA [NM_031357]                                                                                                            | <b>85,951</b> |
| Sfxn3     | Rattus norvegicus sideroflexin 3 (Sfxn3), mRNA [NM_022948]                                                                                                                    | <b>85,826</b> |
| Tmem169   | Rattus norvegicus transmembrane protein 169 (Tmem169), mRNA [NM_001109574]                                                                                                    | <b>85,567</b> |
| Znf580    | PREDICTED: Rattus norvegicus zinc finger protein 580 (Znf580), mRNA [XM_001072400]                                                                                            | <b>85,553</b> |
| Myl12b    | Rattus norvegicus myosin, light chain 12B, regulatory (Myl12b), mRNA [NM_017343]                                                                                              | <b>85,448</b> |
| Slc26a1   | Rattus norvegicus solute carrier family 26 (sulfate transporter), member 1 (Slc26a1), mRNA [NM_022287]                                                                        | <b>85,162</b> |
| Ube2q2l   | Rattus norvegicus ubiquitin-conjugating enzyme E2Q family member 2-like (Ube2q2l), mRNA [NM_001135997]                                                                        | <b>85,147</b> |
| Nfia      | Rattus norvegicus nuclear factor I/A (Nfia), mRNA [NM_012988]                                                                                                                 | <b>84,714</b> |
| Cxcl14    | Rattus norvegicus chemokine (C-X-C motif) ligand 14 (Cxcl14), mRNA [NM_001013137]                                                                                             | <b>84,680</b> |
| Ndufs4    | Rattus norvegicus NADH dehydrogenase (ubiquinone) Fe-S protein 4 (Ndufs4), nuclear gene encoding mitochondrial protein, mRNA [NM_001025146]                                   | <b>84,427</b> |
| Stxbp1    | Rattus norvegicus syntaxin binding protein 1 (Stxbp1), mRNA [NM_013038]                                                                                                       | <b>84,419</b> |
| Creb3l1   | Rattus norvegicus cAMP responsive element binding protein 3-like 1 (Creb3l1), mRNA [NM_001005562]                                                                             | <b>84,403</b> |
| Copz1     | Rattus norvegicus coatamer protein complex, subunit zeta 1 (Copz1), mRNA [NM_001108117]                                                                                       | <b>84,393</b> |
| Fam163a   | Rattus norvegicus family with sequence similarity 163, member A (Fam163a), mRNA [NM_001109072]                                                                                | <b>84,047</b> |
| 0         | Unknown                                                                                                                                                                       | <b>83,828</b> |
| LOC691024 | Rattus norvegicus similar to Protein C9orf25 homolog (LOC691024), mRNA [NM_001109616]                                                                                         | <b>83,421</b> |

|            |                                                                                                                                  |               |
|------------|----------------------------------------------------------------------------------------------------------------------------------|---------------|
| Lrp5       | Rattus norvegicus low density lipoprotein receptor-related protein 5 (Lrp5), mRNA [NM_001106321]                                 | <b>83,320</b> |
| RGD1565164 | PREDICTED: Rattus norvegicus similar to associated molecule with the SH3 domain of STAM (RGD1565164), mRNA [XM_001053795]        | <b>83,272</b> |
| 0          | Unknown                                                                                                                          | <b>83,003</b> |
| Fktn       | Rattus norvegicus fukutin (Fktn), mRNA [NM_001108667]                                                                            | <b>82,970</b> |
| Sprr1a1    | PREDICTED: Rattus norvegicus small proline-rich protein 1A-like (Sprr1a1), mRNA [XM_001056859]                                   | <b>82,926</b> |
| 0          | Unknown                                                                                                                          | <b>82,773</b> |
| LOC313672  | Rattus norvegicus kazrin (LOC313672), mRNA [NM_001014070]                                                                        | <b>82,459</b> |
| Lhpp       | Rattus norvegicus phospholysine phosphohistidine inorganic pyrophosphate phosphatase (Lhpp), mRNA [NM_001009706]                 | <b>82,143</b> |
| 0          | Putative bHLH transcription factor [Source:UniProtKB/TrEMBL;Acc:Q8VD56] [ENSRNOT00000018309]                                     | <b>81,656</b> |
| Kcnj10     | Rattus norvegicus potassium inwardly-rectifying channel, subfamily J, member 10 (Kcnj10), mRNA [NM_031602]                       | <b>81,627</b> |
| Aif1l      | Rattus norvegicus allograft inflammatory factor 1-like (Aif1l), mRNA [NM_001108578]                                              | <b>81,552</b> |
| Igfbp5     | Rattus norvegicus insulin-like growth factor binding protein 5 (Igfbp5), mRNA [NM_012817]                                        | <b>81,322</b> |
| RGD1560691 | Rattus norvegicus similar to calcium/calmodulin-dependent protein kinase 1D (RGD1560691), mRNA [NM_001107365]                    | <b>81,284</b> |
| Mmachc     | Rattus norvegicus methylmalonic aciduria (cobalamin deficiency) cblC type, with homocystinuria (Mmachc), mRNA [NM_001107962]     | <b>81,156</b> |
| LOC681292  | PREDICTED: Rattus norvegicus hypothetical protein LOC681292 (LOC681292), mRNA [XM_001061110]                                     | <b>80,991</b> |
| Mtss1l     | Rattus norvegicus metastasis suppressor 1-like (Mtss1l), mRNA [NM_001191558]                                                     | <b>80,966</b> |
| LOC684327  | PREDICTED: Rattus norvegicus similar to inter-alpha (globulin) inhibitor H5 (LOC684327), mRNA [XM_001069890]                     | <b>80,543</b> |
| Cyb5r3     | Rattus norvegicus cytochrome b5 reductase 3 (Cyb5r3), mRNA [NM_138877]                                                           | <b>80,499</b> |
| Smg6       | Rattus norvegicus Smg-6 homolog, nonsense mediated mRNA decay factor (C. elegans) (Smg6), mRNA [NM_001105808]                    | <b>80,443</b> |
| Zfp278     | Rattus norvegicus zinc finger protein 278 (Zfp278), mRNA [NM_001107231]                                                          | <b>80,132</b> |
| Mapre3     | Rattus norvegicus microtubule-associated protein, RP/EB family, member 3 (Mapre3), mRNA [NM_001007656]                           | <b>79,978</b> |
| G6pd       | Rattus norvegicus glucose-6-phosphate dehydrogenase (G6pd), mRNA [NM_017006]                                                     | <b>79,881</b> |
| 0          | Unknown                                                                                                                          | <b>79,657</b> |
| Prkcg      | Rattus norvegicus protein kinase C, gamma (Prkcg), mRNA [NM_012628]                                                              | <b>79,476</b> |
| Cplx1      | Rattus norvegicus complexin 1 (Cplx1), mRNA [NM_022864]                                                                          | <b>79,348</b> |
| Sox10      | Rattus norvegicus SRY (sex determining region Y)-box 10 (Sox10), mRNA [NM_019193]                                                | <b>79,193</b> |
| Spata2L    | Rattus norvegicus spermatogenesis associated 2-like (Spata2L), mRNA [NM_001109133]                                               | <b>79,173</b> |
| Slc25a35   | Rattus norvegicus solute carrier family 25, member 35 (Slc25a35), mRNA [NM_001109033]                                            | <b>78,903</b> |
| Shank1     | Rattus norvegicus SH3 and multiple ankyrin repeat domains 1 (Shank1), mRNA [NM_031751]                                           | <b>78,681</b> |
| Ttyh3      | Rattus norvegicus tweety homolog 3 (Drosophila) (Ttyh3), mRNA [NM_001107124]                                                     | <b>78,648</b> |
| Pdk2       | Rattus norvegicus pyruvate dehydrogenase kinase, isozyme 2 (Pdk2), nuclear gene encoding mitochondrial protein, mRNA [NM_030872] | <b>78,567</b> |
| Dnm3       | Rattus norvegicus dynamin 3 (Dnm3), mRNA [NM_138538]                                                                             | <b>78,455</b> |
| Samd4b     | Rattus norvegicus sterile alpha motif domain containing 4B (Samd4b), mRNA [NM_001107498]                                         | <b>77,795</b> |
| Git1       | Rattus norvegicus G protein-coupled receptor kinase interacting ArfGAP 1 (Git1), mRNA [NM_031814]                                | <b>77,735</b> |

|            |                                                                                                                                 |               |
|------------|---------------------------------------------------------------------------------------------------------------------------------|---------------|
| RGD1559892 | PREDICTED: Rattus norvegicus similar to 60S ribosomal protein L29 (P23) (RGD1559892), mRNA [XM_001071693]                       | <b>77,630</b> |
| Cyfp2      | Rattus norvegicus cytoplasmic FMR1 interacting protein 2 (Cyfp2), mRNA [NM_001106996]                                           | <b>77,511</b> |
| Adcyap1r1  | Rattus norvegicus adenylate cyclase activating polypeptide 1 receptor 1 (Adcyap1r1), mRNA [NM_133511]                           | <b>77,342</b> |
| Atxn2l     | Rattus norvegicus ataxin 2-like (Atxn2l), mRNA [NM_001130097]                                                                   | <b>76,964</b> |
| Aplp1      | Rattus norvegicus amyloid beta (A4) precursor-like protein 1 (Aplp1), mRNA [NM_001100802]                                       | <b>76,904</b> |
| Fntb       | Rattus norvegicus farnesyltransferase, CAAX box, beta (Fntb), mRNA [NM_172034]                                                  | <b>76,822</b> |
| 0          | Uncharacterized protein [Source:UniProtKB/TrEMBL;Acc:D3ZCL1] [ENSRNOT00000032257]                                               | <b>76,709</b> |
| Bcorl1     | Rattus norvegicus BCL6 co-repressor-like 1 (Bcorl1), mRNA [NM_001191587]                                                        | <b>76,672</b> |
| 0          | Unknown                                                                                                                         | <b>76,124</b> |
| Gas7       | Rattus norvegicus growth arrest specific 7 (Gas7), mRNA [NM_053484]                                                             | <b>75,999</b> |
| Fam113b    | Rattus norvegicus family with sequence similarity 113, member B (Fam113b), mRNA [NM_001039454]                                  | <b>75,642</b> |
| Slc29a4    | Rattus norvegicus solute carrier family 29 (nucleoside transporters), member 4 (Slc29a4), mRNA [NM_001105911]                   | <b>75,553</b> |
| 0          | Unknown                                                                                                                         | <b>75,347</b> |
| Mtss1l     | Rattus norvegicus metastasis suppressor 1-like (Mtss1l), mRNA [NM_001191558]                                                    | <b>75,194</b> |
| Gpr75      | Rattus norvegicus G protein-coupled receptor 75 (Gpr75), mRNA [NM_001109096]                                                    | <b>75,108</b> |
| LOC685385  | PREDICTED: Rattus norvegicus similar to S100 calcium binding protein A14 (LOC685385), mRNA [XM_002725995]                       | <b>75,020</b> |
| Opcml      | Rattus norvegicus opioid binding protein/cell adhesion molecule-like (Opcml), mRNA [NM_053848]                                  | <b>74,830</b> |
| Zmpste24   | Rattus norvegicus zinc metallopeptidase, STE24 homolog (S. cerevisiae) (Zmpste24), mRNA [NM_001107974]                          | <b>74,244</b> |
| Ppme1      | Rattus norvegicus protein phosphatase methylesterase 1 (Ppme1), mRNA [NM_001191838]                                             | <b>74,169</b> |
| Csrp1      | Rattus norvegicus cysteine and glycine-rich protein 1 (Csrp1), mRNA [NM_017148]                                                 | <b>74,131</b> |
| Slc27a1    | Rattus norvegicus solute carrier family 27 (fatty acid transporter), member 1 (Slc27a1), mRNA [NM_053580]                       | <b>74,119</b> |
| Ssbp3      | Rattus norvegicus single stranded DNA binding protein 3 (Ssbp3), mRNA [NM_053358]                                               | <b>74,018</b> |
| 0          | Unknown                                                                                                                         | <b>73,788</b> |
| Cdkn2aipnl | Rattus norvegicus CDKN2A interacting protein N-terminal like (Cdkn2aipnl), mRNA [NM_001008278]                                  | <b>73,704</b> |
| LOC691984  | PREDICTED: Rattus norvegicus similar to Glypican-6 precursor (LOC691984), mRNA [XM_002725130]                                   | <b>73,692</b> |
| RGD1565772 | Rattus norvegicus similar to hypothetical protein A430110N23 (RGD1565772), mRNA [NM_001134545]                                  | <b>73,544</b> |
| Sf3a2      | Rattus norvegicus splicing factor 3a, subunit 2 (Sf3a2), mRNA [NM_001011986]                                                    | <b>73,527</b> |
| Ece1       | Rattus norvegicus endothelin converting enzyme 1 (Ece1), mRNA [NM_053596]                                                       | <b>73,439</b> |
| Carm1      | Rattus norvegicus coactivator-associated arginine methyltransferase 1 (Carm1), transcript variant 1, mRNA [NM_001030041]        | <b>73,060</b> |
| Grm4       | Rattus norvegicus glutamate receptor, metabotropic 4 (Grm4), mRNA [NM_022666]                                                   | <b>73,043</b> |
| Cd248      | Rattus norvegicus CD248 molecule, endosialin (Cd248), mRNA [NM_001106325]                                                       | <b>72,951</b> |
| Pip5k1c    | Rattus norvegicus phosphatidylinositol-4-phosphate 5-kinase, type I, gamma (Pip5k1c), transcript variant c, mRNA [NM_001009967] | <b>72,467</b> |
| Adcyap1r1  | Rattus norvegicus adenylate cyclase activating polypeptide 1 receptor 1 (Adcyap1r1), mRNA [NM_133511]                           | <b>72,378</b> |
| Arsb       | Rattus norvegicus arylsulfatase B (Arsb), mRNA [NM_033443]                                                                      | <b>72,356</b> |

|            |                                                                                                                                                                             |        |
|------------|-----------------------------------------------------------------------------------------------------------------------------------------------------------------------------|--------|
| Wipf3      | Rattus norvegicus WAS/WASL interacting protein family, member 3 (Wipf3), mRNA [NM_147211]                                                                                   | 72,237 |
| Znf703     | Rattus norvegicus zinc finger protein 703 (Znf703), mRNA [NM_001109425]                                                                                                     | 71,872 |
| Elmo3      | Rattus norvegicus engulfment and cell motility 3 (Elmo3), mRNA [NM_001030028]                                                                                               | 71,618 |
| B3gnt7     | Rattus norvegicus UDP-GlcNAc:betaGal beta-1,3-N-acetylglucosaminyltransferase 7 (B3gnt7), mRNA [NM_001012134]                                                               | 71,514 |
| 0          | Unknown                                                                                                                                                                     | 71,460 |
| Igf2       | Rattus norvegicus insulin-like growth factor 2 (Igf2), transcript variant 1, mRNA [NM_031511]                                                                               | 71,400 |
| Rab5b      | Rattus norvegicus RAB5B, member RAS oncogene family (Rab5b), mRNA [NM_001079936]                                                                                            | 71,078 |
| Eef1a2     | Rattus norvegicus eukaryotic translation elongation factor 1 alpha 2 (Eef1a2), mRNA [NM_012660]                                                                             | 71,025 |
| Bruno15    | Rattus norvegicus bruno-like 5, RNA binding protein (Drosophila) (Bruno15), mRNA [NM_001135603]                                                                             | 70,841 |
| Coq10a     | Rattus norvegicus coenzyme Q10 homolog A (S. cerevisiae) (Coq10a), nuclear gene encoding mitochondrial protein, mRNA [NM_001108727]                                         | 70,436 |
| Cblb       | Rattus norvegicus Cas-Br-M (murine) ecotropic retroviral transforming sequence b (Cblb), mRNA [NM_133601]                                                                   | 70,336 |
| Creb3l2    | Rattus norvegicus cAMP responsive element binding protein 3-like 2 (Creb3l2), mRNA [NM_001012188]                                                                           | 70,306 |
| Shisa7     | Rattus norvegicus shisa homolog 7 (Xenopus laevis) (Shisa7), mRNA [NM_001145175]                                                                                            | 70,281 |
| 0          | LAMBV_CHICK (Q01636) Laminin beta-1 chain variant (Laminin beta-1-2 chain) (Fragment), partial (11%) [TC599571]                                                             | 70,253 |
| Tmem214    | Rattus norvegicus transmembrane protein 214 (Tmem214), mRNA [NM_001014195]                                                                                                  | 70,045 |
| Rab1b      | Rattus norvegicus RAB1B, member RAS oncogene family (Rab1b), mRNA [NM_001109979]                                                                                            | 69,993 |
| Cbl1       | Rattus norvegicus Cas-Br-M (murine) ecotropic retroviral transforming sequence-like 1 (Cbl1), mRNA [NM_001108018]                                                           | 69,808 |
| Cacng4     | Rattus norvegicus calcium channel, voltage-dependent, gamma subunit 4 (Cacng4), mRNA [NM_080692]                                                                            | 69,568 |
| 0          | Unknown                                                                                                                                                                     | 69,336 |
| Midn       | Rattus norvegicus midnolin (Midn), mRNA [NM_001191577]                                                                                                                      | 69,223 |
| RGD1309823 | PREDICTED: Rattus norvegicus similar to hypothetical protein FLJ21156 (RGD1309823), miscRNA [XR_085840]                                                                     | 69,195 |
| 0          | Rattus norvegicus, 25 clones, strain BN/SsNHsdMCW RNOR03324481, whole genome shotgun sequence [AABR03128056]                                                                | 69,193 |
| RGD1562814 | Rattus norvegicus similar to Peptidyl-prolyl cis-trans isomerase A (PPIase) (Rotamase) (Cyclophilin A) (Cyclosporin A-binding protein) (SP18) (LOC366866), mRNA [XM_345810] | 69,178 |
| 0          | Rattus norvegicus clone UI-R-FJ0-cpy-I-05-0-UI unknown mRNA. [AY724520]                                                                                                     | 69,019 |
| Sarm1      | Rattus norvegicus sterile alpha and TIR motif containing 1 (Sarm1), mRNA [NM_001105817]                                                                                     | 69,018 |
| Dap        | Rattus norvegicus death-associated protein (Dap), mRNA [NM_022526]                                                                                                          | 69,007 |
| Nrxn2      | Rattus norvegicus neurexin 2 (Nrxn2), mRNA [NM_053846]                                                                                                                      | 68,994 |
| Ryr2       | Rattus norvegicus ryanodine receptor 2, cardiac (Ryr2), transcript variant 1, mRNA [NM_032078]                                                                              | 68,987 |
| Mapre2     | Rattus norvegicus microtubule-associated protein, RP/EB family, member 2 (Mapre2), mRNA [NM_001101000]                                                                      | 68,915 |
| RGD1309228 | Rattus norvegicus similar to putative protein, with at least 9 transmembrane domains, of eukaryotic origin (43.9 kD) (2G415) (RGD1309228), mRNA [NM_001017451]              | 68,760 |
| Med15      | Rattus norvegicus mediator complex subunit 15 (Med15), mRNA [NM_001108325]                                                                                                  | 68,709 |
| LOC314140  | Rattus norvegicus ribose-phosphate pyrophosphokinase I-like (LOC314140), mRNA [NM_001009694]                                                                                | 68,657 |

|            |                                                                                                                                                                                                                                                                 |               |
|------------|-----------------------------------------------------------------------------------------------------------------------------------------------------------------------------------------------------------------------------------------------------------------|---------------|
| 0          | Unknown                                                                                                                                                                                                                                                         | <b>68,550</b> |
| Cnot4      | Rattus norvegicus CCR4-NOT transcription complex, subunit 4 (Cnot4), mRNA [NM_001037782]                                                                                                                                                                        | <b>68,445</b> |
| Sema4b     | Rattus norvegicus sema domain, immunoglobulin domain (Ig), transmembrane domain (TM) and short cytoplasmic domain, (semaphorin) 4B (Sema4b), mRNA [NM_001170462]                                                                                                | <b>68,400</b> |
| Cacng7     | Rattus norvegicus calcium channel, voltage-dependent, gamma subunit 7 (Cacng7), mRNA [NM_080695]                                                                                                                                                                | <b>68,390</b> |
| 0          | Somatoliberin [Source:UniProtKB/Swiss-Prot;Acc:P09916] [ENSRNOT00000010298]                                                                                                                                                                                     | <b>68,314</b> |
| Zfp278     | Rattus norvegicus zinc finger protein 278 (Zfp278), mRNA [NM_001107231]                                                                                                                                                                                         | <b>68,303</b> |
| Spon1      | Rattus norvegicus spondin 1, extracellular matrix protein (Spon1), mRNA [NM_172067]                                                                                                                                                                             | <b>68,199</b> |
| Rph3al     | Rattus norvegicus rabphilin 3A-like (without C2 domains) (Rph3al), mRNA [NM_133591]                                                                                                                                                                             | <b>68,119</b> |
| 0          | Unknown                                                                                                                                                                                                                                                         | <b>67,923</b> |
| Klrk1      | Rattus norvegicus killer cell lectin-like receptor subfamily K, member 1 (Klrk1), mRNA [NM_133512]                                                                                                                                                              | <b>67,769</b> |
| Krt1       | Rattus norvegicus keratin 1 (Krt1), mRNA [NM_001008802]                                                                                                                                                                                                         | <b>67,680</b> |
| 0          | AGENCOURT_109872229 NIH_MGC_418 Rattus norvegicus cDNA clone IMAGE:9024004 5', mRNA sequence [EV766865]                                                                                                                                                         | <b>67,586</b> |
| Cntnap1    | Rattus norvegicus contactin associated protein 1 (Cntnap1), mRNA [NM_032061]                                                                                                                                                                                    | <b>67,481</b> |
| Raver1     | Rattus norvegicus ribonucleoprotein, PTB-binding 1 (Raver1), mRNA [NM_001013939]                                                                                                                                                                                | <b>67,345</b> |
| Sos2       | Rattus norvegicus son of sevenless homolog 2 (Drosophila) (Sos2), mRNA [NM_001135561]                                                                                                                                                                           | <b>67,293</b> |
| Ctdsp1     | Rattus norvegicus CTD (carboxy-terminal domain, RNA polymerase II, polypeptide A) small phosphatase 1 (Ctdsp1), mRNA [NM_001128079]                                                                                                                             | <b>67,074</b> |
| Prr13      | Rattus norvegicus proline rich 13 (Prr13), mRNA [NM_001008379]                                                                                                                                                                                                  | <b>67,007</b> |
| RGD1562890 | Rattus norvegicus RGD1562890 (RGD1562890), non-coding RNA [NR_037704]                                                                                                                                                                                           | <b>66,820</b> |
| Tgfb2      | Rattus norvegicus transforming growth factor, beta 2 (Tgfb2), mRNA [NM_031131]                                                                                                                                                                                  | <b>66,785</b> |
| 0          | RGS6_HUMAN (P49758) Regulator of G-protein signaling 6 (RGS6) (S914), partial (11%) [TC592366]                                                                                                                                                                  | <b>66,700</b> |
| Mudeng     | Rattus norvegicus MU-2/AP1M2 domain containing, death-inducing (Mudeng), mRNA [NM_001030036]                                                                                                                                                                    | <b>66,689</b> |
| 0          | RATMTCYTOC Rattus norvegicus tRNA-Trp, tRNA-Ala, tRNA-Asn, tRNA-Cys, and tRNA-Tyr genes, complete sequence; cytochrome c oxidase subunit I (Co I) gene, complete cds; tRNA-Ser and tRNA-Asp genes, complete sequence; cytochrome c oxidase subunit II (Co II) g | <b>66,509</b> |
| Dcakd      | Rattus norvegicus dephospho-CoA kinase domain containing (Dcakd), mRNA [NM_001007724]                                                                                                                                                                           | <b>66,477</b> |
| Smmap2     | Rattus norvegicus small ArfGAP2 (Smmap2), mRNA [NM_001100669]                                                                                                                                                                                                   | <b>66,419</b> |
| Rab6b      | Rattus norvegicus RAB6B, member RAS oncogene family (Rab6b), mRNA [NM_001108775]                                                                                                                                                                                | <b>66,407</b> |
| Myo1e      | Rattus norvegicus myosin IE (Myo1e), mRNA [NM_173101]                                                                                                                                                                                                           | <b>66,373</b> |
| Nrep       | Rattus norvegicus neuronal regeneration related protein (Nrep), mRNA [NM_178096]                                                                                                                                                                                | <b>66,207</b> |
| Rere       | Rattus norvegicus arginine-glutamic acid dipeptide (RE) repeats (Rere), mRNA [NM_053885]                                                                                                                                                                        | <b>66,181</b> |
| Egr1       | Rattus norvegicus early growth response 1 (Egr1), mRNA [NM_012551]                                                                                                                                                                                              | <b>66,176</b> |
| 0          | Unknown                                                                                                                                                                                                                                                         | <b>66,172</b> |
| Pitpnm2    | Rattus norvegicus phosphatidylinositol transfer protein, membrane-associated 2 (Pitpnm2), mRNA [NM_001107139]                                                                                                                                                   | <b>66,144</b> |
| Zc4h2      | Rattus norvegicus zinc finger, C4H2 domain containing (Zc4h2), mRNA [NM_001126374]                                                                                                                                                                              | <b>66,101</b> |



|              |                                                                                                                                                            |               |
|--------------|------------------------------------------------------------------------------------------------------------------------------------------------------------|---------------|
| Plekhm1      | Rattus norvegicus pleckstrin homology domain containing, family M (with RUN domain) member 1 (Plekhm1), mRNA [NM_001009677]                                | <b>66,081</b> |
| Cugbp1       | Rattus norvegicus CUG triplet repeat, RNA binding protein 1 (Cugbp1), mRNA [NM_001025421]                                                                  | <b>66,008</b> |
| Nlgn2        | Rattus norvegicus neuroligin 2 (Nlgn2), mRNA [NM_053992]                                                                                                   | <b>65,983</b> |
| RGD1563516   | PREDICTED: Rattus norvegicus similar to histone protein Hist2h3c1 (RGD1563516), miscRNA [XR_006811]                                                        | <b>65,907</b> |
| Atoh1        | Rattus norvegicus atonal homolog 1 (Drosophila) (Atoh1), mRNA [NM_001109238]                                                                               | <b>65,885</b> |
| Bend6        | Rattus norvegicus BEN domain containing 6 (Bend6), mRNA [NM_001108792]                                                                                     | <b>65,788</b> |
| 0            | Unknown                                                                                                                                                    | <b>65,764</b> |
| Ube2l3       | Rattus norvegicus ubiquitin-conjugating enzyme E2L 3 (Ube2l3), mRNA [NM_001108847]                                                                         | <b>65,706</b> |
| Cpt1a        | Rattus norvegicus carnitine palmitoyltransferase 1a, liver (Cpt1a), nuclear gene encoding mitochondrial protein, mRNA [NM_031559]                          | <b>65,597</b> |
| 0            | Unknown                                                                                                                                                    | <b>65,530</b> |
| Kdm2a        | Rattus norvegicus lysine (K)-specific demethylase 2A (Kdm2a), mRNA [NM_001108515]                                                                          | <b>65,433</b> |
| Med25        | Rattus norvegicus mediator complex subunit 25 (Med25), mRNA [NM_001170426]                                                                                 | <b>65,428</b> |
| Camk2d       | Rattus norvegicus calcium/calmodulin-dependent protein kinase II delta (Camk2d), mRNA [NM_012519]                                                          | <b>65,348</b> |
| 0            | BF285957 EST450548 Rat Gene Index, normalized rat, Rattus norvegicus cDNA Rattus norvegicus cDNA clone RGIFL30, mRNA sequence [BF285957]                   | <b>65,345</b> |
| RGD1304952   | Rattus norvegicus similar to RIKEN cDNA C530028O21 gene (RGD1304952), mRNA [NM_001014059]                                                                  | <b>65,340</b> |
| Gng7         | Rattus norvegicus guanine nucleotide binding protein (G protein), gamma 7 (Gng7), mRNA [NM_024138]                                                         | <b>65,295</b> |
| Nrsn1        | Rattus norvegicus neurensin 1 (Nrsn1), mRNA [NM_001106109]                                                                                                 | <b>65,271</b> |
| Plekhb1      | Rattus norvegicus pleckstrin homology domain containing, family B (evectins) member 1 (Plekhb1), mRNA [NM_172033]                                          | <b>65,242</b> |
| Ube2d1       | Rattus norvegicus ubiquitin-conjugating enzyme E2D 1, UBC4/5 homolog (yeast) (Ube2d1), mRNA [NM_001108530]                                                 | <b>64,957</b> |
| Hic1         | Rattus norvegicus hypermethylated in cancer 1 (Hic1), mRNA [NM_001107021]                                                                                  | <b>64,894</b> |
| Prkaca       | Rattus norvegicus protein kinase, cAMP-dependent, catalytic, alpha (Prkaca), mRNA [NM_001100922]                                                           | <b>64,862</b> |
| Ppard        | Rattus norvegicus peroxisome proliferator-activated receptor delta (Ppard), mRNA [NM_013141]                                                               | <b>64,821</b> |
| Il13ra1      | Rattus norvegicus interleukin 13 receptor, alpha 1 (Il13ra1), mRNA [NM_145789]                                                                             | <b>64,543</b> |
| Bbs1         | Rattus norvegicus Bardet-Biedl syndrome 1 (Bbs1), mRNA [NM_001107569]                                                                                      | <b>64,496</b> |
| Megf11       | PREDICTED: Rattus norvegicus multiple EGF-like-domains 11 (Megf11), mRNA [XM_001078620]                                                                    | <b>64,480</b> |
| Cfl1         | Rattus norvegicus cofilin 1, non-muscle (Cfl1), mRNA [NM_017147]                                                                                           | <b>64,387</b> |
| 0            | Unknown                                                                                                                                                    | <b>64,283</b> |
| Hcfc1r1      | Rattus norvegicus host cell factor C1 regulator 1 (XPO1-dependent) (Hcfc1r1), transcript variant 1, mRNA [NM_001185047]                                    | <b>64,278</b> |
| Hmgcs2       | Rattus norvegicus 3-hydroxy-3-methylglutaryl-Coenzyme A synthase 2 (mitochondrial) (Hmgcs2), nuclear gene encoding mitochondrial protein, mRNA [NM_173094] | <b>64,277</b> |
| LOC100364559 | PREDICTED: Rattus norvegicus gene model 691, (NCBI)-like (LOC100364559), mRNA [XM_002726287]                                                               | <b>64,173</b> |
| Nrxn2        | Rattus norvegicus neurexin 2 (Nrxn2), mRNA [NM_053846]                                                                                                     | <b>64,044</b> |
| Plip         | Rattus norvegicus plasma membrane proteolipid (plasmolipin) (Plip), mRNA [NM_022533]                                                                       | <b>63,933</b> |

|            |                                                                                                                                |        |
|------------|--------------------------------------------------------------------------------------------------------------------------------|--------|
| Dullard    | Rattus norvegicus Dullard homolog (Xenopus laevis) (Dullard), mRNA [NM_001100494]                                              | 63,875 |
| 39692      | Rattus norvegicus septin 8 (Sept8), mRNA [NM_001107002]                                                                        | 63,656 |
| Fxyd7      | Rattus norvegicus FXYD domain-containing ion transport regulator 7 (Fxyd7), mRNA [NM_022008]                                   | 63,544 |
| Zc3h7b     | Rattus norvegicus zinc finger CCCH-type containing 7B (Zc3h7b), mRNA [NM_001130695]                                            | 63,359 |
| Wiz        | Rattus norvegicus widely-interspaced zinc finger motifs (Wiz), mRNA [NM_001108064]                                             | 63,332 |
| 0          | Palmitoyl-protein thioesterase 1 [Source:UniProtKB/Swiss-Prot;Acc:P45479] [ENSRNOT00000017998]                                 | 63,067 |
| H2afx      | Rattus norvegicus H2A histone family, member X (H2afx), mRNA [NM_001109291]                                                    | 62,915 |
| Apln       | Rattus norvegicus apelin (Apln), mRNA [NM_031612]                                                                              | 62,878 |
| Banf1      | Rattus norvegicus barrier to autointegration factor 1 (Banf1), mRNA [NM_053631]                                                | 62,836 |
| 0          | Unknown                                                                                                                        | 62,789 |
| Slc41a1    | Rattus norvegicus solute carrier family 41, member 1 (Slc41a1), mRNA [NM_001108855]                                            | 62,752 |
| 0          | Unknown                                                                                                                        | 62,724 |
| 0          | Unknown                                                                                                                        | 62,719 |
| Atxn2l     | Rattus norvegicus ataxin 2-like (Atxn2l), mRNA [NM_001130097]                                                                  | 62,580 |
| Hist1h2bh  | Rattus norvegicus histone cluster 1, H2bh (Hist1h2bh), mRNA [NM_001107352]                                                     | 62,546 |
| Men1       | Rattus norvegicus multiple endocrine neoplasia 1 (Men1), mRNA [NM_019208]                                                      | 62,536 |
| 0          | PREDICTED: Rattus norvegicus similar to mKIAA0574 protein (RGD1559470), mRNA [XM_001056143]                                    | 62,422 |
| Slc38a7    | Rattus norvegicus solute carrier family 38, member 7 (Slc38a7), mRNA [NM_001003705]                                            | 62,234 |
| LOC313641  | PREDICTED: Rattus norvegicus perlecan (LOC313641), miscRNA [XR_009630]                                                         | 62,209 |
| Kdm6b      | Rattus norvegicus lysine (K)-specific demethylase 6B (Kdm6b), mRNA [NM_001108829]                                              | 62,121 |
| Pkp2       | Rattus norvegicus plakophilin 2 (Pkp2), mRNA [NM_001100499]                                                                    | 62,093 |
| 0          | Unknown                                                                                                                        | 62,026 |
| LOC686506  | Rattus norvegicus hypothetical protein LOC686506 (LOC686506), mRNA [NM_001134729]                                              | 61,975 |
| Jam2       | Rattus norvegicus junctional adhesion molecule 2 (Jam2), mRNA [NM_001034004]                                                   | 61,972 |
| Zfp39      | Rattus norvegicus zinc finger protein 39 (Zfp39), mRNA [NM_001107004]                                                          | 61,953 |
| Emp3       | Rattus norvegicus epithelial membrane protein 3 (Emp3), mRNA [NM_030847]                                                       | 61,628 |
| Prrg3      | PREDICTED: Rattus norvegicus proline rich Gla (G-carboxyglutamic acid) 3 (transmembrane) (Prrg3), mRNA [XM_219845]             | 61,600 |
| Sox13      | Rattus norvegicus SRY (sex determining region Y)-box 13 (Sox13), mRNA [NM_001105952]                                           | 61,482 |
| Slc7a5     | Rattus norvegicus solute carrier family 7 (cationic amino acid transporter, y+ system), member 5 (Slc7a5), mRNA [NM_017353]    | 61,445 |
| Sap25      | PREDICTED: Rattus norvegicus similar to FLJ00248 protein (RGD1562406), mRNA [XM_001076431]                                     | 61,427 |
| Il1f5      | Rattus norvegicus interleukin 1 family, member 5 (delta) (Il1f5), mRNA [NM_001107814]                                          | 61,300 |
| RGD1308124 | PREDICTED: Rattus norvegicus similar to KIAA1357 protein, transcript variant 2 (RGD1308124), mRNA [XM_002725450]               | 61,168 |
| Mrps2      | Rattus norvegicus mitochondrial ribosomal protein S2 (Mrps2), nuclear gene encoding mitochondrial protein, mRNA [NM_001108576] | 61,089 |
| 0          | additional sex combs like 3 (Drosophila) Gene [Source:MGI Symbol;Acc:MGI:2685175] [ENSRNOT00000020661]                         | 61,012 |

|            |                                                                                                                                          |               |
|------------|------------------------------------------------------------------------------------------------------------------------------------------|---------------|
| Glrx1      | Rattus norvegicus glutaredoxin 1 (Glrx1), mRNA [NM_022278]                                                                               | <b>60,980</b> |
| Vcl        | Rattus norvegicus vinculin (Vcl), mRNA [NM_001107248]                                                                                    | <b>60,936</b> |
| Wiz        | Rattus norvegicus widely-interspaced zinc finger motifs (Wiz), mRNA [NM_001108064]                                                       | <b>60,846</b> |
| S100b      | Rattus norvegicus S100 calcium binding protein B (S100b), mRNA [NM_013191]                                                               | <b>60,719</b> |
| Dock1      | Rattus norvegicus dedicator of cyto-kinesis 1 (Dock1), mRNA [NM_001143858]                                                               | <b>60,686</b> |
| Fam107a    | Rattus norvegicus family with sequence similarity 107, member A (Fam107a), mRNA [NM_001025129]                                           | <b>60,653</b> |
| Irf2bp1    | Rattus norvegicus interferon regulatory factor 2 binding protein 1 (Irf2bp1), mRNA [NM_001107483]                                        | <b>60,605</b> |
| Alk        | Rattus norvegicus anaplastic lymphoma kinase (Alk), mRNA [NM_001169101]                                                                  | <b>60,529</b> |
| Sdc3       | Rattus norvegicus syndecan 3 (Sdc3), mRNA [NM_053893]                                                                                    | <b>60,480</b> |
| Cd47       | Rattus norvegicus Cd47 molecule (Cd47), mRNA [NM_019195]                                                                                 | <b>60,383</b> |
| 0          | Unknown                                                                                                                                  | <b>60,343</b> |
| 0          | Unknown                                                                                                                                  | <b>60,261</b> |
| Mcart1l    | Rattus norvegicus mitochondrial carrier triple repeat 1-like (Mcart1l), nuclear gene encoding mitochondrial protein, mRNA [NM_001127602] | <b>60,109</b> |
| Vom1r-ps39 | Rattus norvegicus vomeronasal 1 receptor pseudogene 39 (Vom1r-ps39), mRNA [NM_001009509]                                                 | <b>60,046</b> |
| 0          | Uncharacterized protein [Source:UniProtKB/TrEMBL;Acc:D4A0J6] [ENSRNOT00000051194]                                                        | <b>60,027</b> |
| Fmn2       | PREDICTED: Rattus norvegicus formin 2 (Fmn2), mRNA [XM_001058601]                                                                        | <b>60,016</b> |
| Mesdc1     | Rattus norvegicus mesoderm development candidate 1 (Mesdc1), mRNA [NM_001013149]                                                         | <b>59,993</b> |
| Notch2     | Rattus norvegicus Notch homolog 2 (Drosophila) (Notch2), mRNA [NM_024358]                                                                | <b>59,875</b> |
| RGD1563319 | Uncharacterized protein [Source:UniProtKB/TrEMBL;Acc:D3ZMZ8] [ENSRNOT00000027344]                                                        | <b>59,827</b> |
| Nrm        | Rattus norvegicus nurim (nuclear envelope membrane protein) (Nrm), mRNA [NM_212508]                                                      | <b>59,824</b> |
| Eif4ebp2   | Rattus norvegicus eukaryotic translation initiation factor 4E binding protein 2 (Eif4ebp2), mRNA [NM_001033069]                          | <b>59,754</b> |
| Ube2d2     | Rattus norvegicus ubiquitin-conjugating enzyme E2D 2 (UBC4/5 homolog, yeast) (Ube2d2), mRNA [NM_001037292]                               | <b>59,693</b> |
| 0          | Unknown                                                                                                                                  | <b>59,522</b> |
| Gstm6l     | Rattus norvegicus glutathione S-transferase, mu 6-like (Gstm6l), mRNA [NM_001106464]                                                     | <b>59,494</b> |
| 0          | Rattus norvegicus similar to 60S RIBOSOMAL PROTEIN L29 (P23) (LOC293697), mRNA [XM_219533]                                               | <b>59,428</b> |
| Dazap2     | Rattus norvegicus DAZ associated protein 2 (Dazap2), mRNA [NM_001013107]                                                                 | <b>59,421</b> |
| Rbms2      | Rattus norvegicus RNA binding motif, single stranded interacting protein 2 (Rbms2), mRNA [NM_001025403]                                  | <b>59,396</b> |
| 0          | Unknown                                                                                                                                  | <b>59,370</b> |
| Calcoco1   | Rattus norvegicus calcium binding and coiled coil domain 1 (Calcoco1), mRNA [NM_139190]                                                  | <b>59,307</b> |
| 0          | Q8QQ04_CAMPS (Q8QQ04) CMP190R, partial (13%) [TC605838]                                                                                  | <b>59,234</b> |
| Atxn7l1    | Uncharacterized protein [Source:UniProtKB/TrEMBL;Acc:D3ZHW8] [ENSRNOT00000014054]                                                        | <b>59,173</b> |
| LOC680207  | PREDICTED: Rattus norvegicus hypothetical protein LOC680207 (LOC680207), mRNA [XM_001056119]                                             | <b>59,036</b> |
| RGD1305215 | Rattus norvegicus similar to expressed sequence AA960436 (RGD1305215), mRNA [NM_001014013]                                               | <b>58,819</b> |
| MII5       | MII5 protein [Source:UniProtKB/TrEMBL;Acc:B1WBR7] [ENSRNOT00000038978]                                                                   | <b>58,779</b> |

|            |                                                                                                                        |               |
|------------|------------------------------------------------------------------------------------------------------------------------|---------------|
| Abhd15     | Rattus norvegicus abhydrolase domain containing 15 (Abhd15), mRNA [NM_001107025]                                       | <b>58,747</b> |
| Kcna7      | Rattus norvegicus potassium voltage-gated channel, shaker-related subfamily, member 7 (Kcna7), mRNA [NM_001108914]     | <b>58,743</b> |
| 0          | Kinesin light chain 2 (Predicted), isoform CRA_bKlc2 protein [Source:UniProtKB/TrEMBL;Acc:B2GV74] [ENSRNOT00000041238] | <b>58,536</b> |
| Abhd4      | Rattus norvegicus abhydrolase domain containing 4 (Abhd4), mRNA [NM_001108866]                                         | <b>58,501</b> |
| 0          | Unknown                                                                                                                | <b>58,485</b> |
| Ptpn23     | Rattus norvegicus protein tyrosine phosphatase, non-receptor type 23 (Ptpn23), mRNA [NM_057204]                        | <b>58,467</b> |
| Pcdh15     | Unknown                                                                                                                | <b>58,450</b> |
| 0          | AW914971 EST346275 Normalized rat ovary, Bento Soares Rattus sp. cDNA clone RGIBN04 5' end, mRNA sequence [AW914971]   | <b>58,444</b> |
| Myd88      | Rattus norvegicus myeloid differentiation primary response gene 88 (Myd88), mRNA [NM_198130]                           | <b>58,379</b> |
| Copz1      | Rattus norvegicus coatomer protein complex, subunit zeta 1 (Copz1), mRNA [NM_001108117]                                | <b>58,366</b> |
| Grm4       | Rattus norvegicus glutamate receptor, metabotropic 4 (Grm4), mRNA [NM_022666]                                          | <b>58,346</b> |
| Rsu1       | Rattus norvegicus Ras suppressor protein 1 (Rsu1), mRNA [NM_001109404]                                                 | <b>58,328</b> |
| Pnpla2     | Rattus norvegicus patatin-like phospholipase domain containing 2 (Pnpla2), mRNA [NM_001108509]                         | <b>58,290</b> |
| Urm1       | Rattus norvegicus ubiquitin related modifier 1 homolog (S. cerevisiae) (Urm1), mRNA [NM_001137562]                     | <b>58,276</b> |
| Enah       | Rattus norvegicus enabled homolog (Drosophila) (Enah), mRNA [NM_001012150]                                             | <b>58,271</b> |
| Ube2n      | Rattus norvegicus ubiquitin-conjugating enzyme E2N (UBC13 homolog, yeast) (Ube2n), mRNA [NM_053928]                    | <b>58,212</b> |
| 0          | Ketohexokinase [Source:UniProtKB/Swiss-Prot;Acc:Q02974] [ENSRNOT00000043572]                                           | <b>58,094</b> |
| C1qtnf6    | Rattus norvegicus C1q and tumor necrosis factor related protein 6 (C1qtnf6), mRNA [NM_001034932]                       | <b>58,087</b> |
| RGD1562674 | PREDICTED: Rattus norvegicus similar to kinase suppressor of ras 2 (RGD1562674), mRNA [XM_222212]                      | <b>57,944</b> |
| Stard6     | Rattus norvegicus StAR-related lipid transfer (START) domain containing 6 (Stard6), mRNA [NM_001007627]                | <b>57,843</b> |
| 0          | Uncharacterized protein [Source:UniProtKB/TrEMBL;Acc:D3Z7Z0] [ENSRNOT00000033201]                                      | <b>57,839</b> |
| 0          | Unknown                                                                                                                | <b>57,827</b> |
| Cybrd1     | Rattus norvegicus cytochrome b reductase 1 (Cybrd1), mRNA [NM_001011954]                                               | <b>57,750</b> |
| Gdf6       | Rattus norvegicus growth differentiation factor 6 (Gdf6), mRNA [NM_001013038]                                          | <b>57,715</b> |
| Arl8a      | Rattus norvegicus ADP-ribosylation factor-like 8A (Arl8a), mRNA [NM_001109071]                                         | <b>57,694</b> |
| Elf3       | Rattus norvegicus E74-like factor 3 (Elf3), mRNA [NM_001024768]                                                        | <b>57,608</b> |
| Nr1d1      | Rattus norvegicus nuclear receptor subfamily 1, group D, member 1 (Nr1d1), transcript variant 2, mRNA [NM_145775]      | <b>57,508</b> |
| Slc39a1    | Rattus norvegicus solute carrier family 39 (zinc transporter), member 1 (Slc39a1), mRNA [NM_001134577]                 | <b>57,485</b> |
| 0          | Unknown                                                                                                                | <b>57,214</b> |
| R3hdm2     | Rattus norvegicus R3H domain containing 2 (R3hdm2), mRNA [NM_001130557]                                                | <b>57,198</b> |
| Arhgef9    | Rattus norvegicus Cdc42 guanine nucleotide exchange factor (GEF) 9 (Arhgef9), mRNA [NM_023957]                         | <b>57,172</b> |
| 0          | Unknown                                                                                                                | <b>57,146</b> |
| Psmf1      | Rattus norvegicus proteasome inhibitor subunit 1 (Psmf1), mRNA [NM_001101005]                                          | <b>57,133</b> |
| Lpl        | Rattus norvegicus lipoprotein lipase (Lpl), mRNA [NM_012598]                                                           | <b>56,974</b> |

|            |                                                                                                                                        |               |
|------------|----------------------------------------------------------------------------------------------------------------------------------------|---------------|
| Prkca      | Rattus norvegicus protein kinase C, alpha (Prkca), mRNA [NM_001105713]                                                                 | <b>56,964</b> |
| Atn1       | Rattus norvegicus atrophin 1 (Atn1), mRNA [NM_017228]                                                                                  | <b>56,886</b> |
| 0          | Unknown                                                                                                                                | <b>56,886</b> |
| Col1a1     | Rattus norvegicus collagen, type I, alpha 1 (Col1a1), mRNA [NM_053304]                                                                 | <b>56,683</b> |
| LOC682105  | Rattus norvegicus similar to receptor expression enhancing protein 2 (LOC682105), mRNA [NM_001048047]                                  | <b>56,613</b> |
| Gjd2       | Rattus norvegicus gap junction protein, delta 2 (Gjd2), mRNA [NM_019281]                                                               | <b>56,517</b> |
| Cugbp2     | Rattus norvegicus CUG triplet repeat, RNA binding protein 2 (Cugbp2), transcript variant 2, mRNA [NM_001083586]                        | <b>56,515</b> |
| Actn4      | Rattus norvegicus actinin alpha 4 (Actn4), mRNA [NM_031675]                                                                            | <b>56,476</b> |
| Slc22a23   | Rattus norvegicus solute carrier family 22, member 23 (Slc22a23), mRNA [NM_022624]                                                     | <b>56,337</b> |
| Olfml3     | Rattus norvegicus olfactomedin-like 3 (Olfml3), mRNA [NM_001107708]                                                                    | <b>56,309</b> |
| 0          | Unknown                                                                                                                                | <b>56,298</b> |
| RGD1565591 | PREDICTED: Rattus norvegicus similar to Ski protein (RGD1565591), partial mRNA [XM_001077382]                                          | <b>56,256</b> |
| Tax1bp3    | Rattus norvegicus Tax1 (human T-cell leukemia virus type I) binding protein 3 (Tax1bp3), mRNA [NM_001025419]                           | <b>56,240</b> |
| 0          | Rattus norvegicus similar to RIKEN cDNA 4930415K17 (LOC302803), mRNA [XM_217625]                                                       | <b>56,211</b> |
| 0          | C5AR_RABIT (Q9TUE1) C5a anaphylatoxin chemotactic receptor (C5a-R) (C5aR) (CD88 antigen) (Fragment), partial (7%) [TC623897]           | <b>56,191</b> |
| Efnb1      | Rattus norvegicus ephrin B1 (Efnb1), mRNA [NM_017089]                                                                                  | <b>56,174</b> |
| Gna14      | Rattus norvegicus guanine nucleotide binding protein, alpha 14 (Gna14), mRNA [NM_001013151]                                            | <b>56,171</b> |
| Syt5       | Rattus norvegicus synaptotagmin V (Syt5), mRNA [NM_019350]                                                                             | <b>56,018</b> |
| Plvap      | Rattus norvegicus plasmalemma vesicle associated protein (Plvap), mRNA [NM_020086]                                                     | <b>55,927</b> |
| 0          | Unknown                                                                                                                                | <b>55,907</b> |
| Abhd2      | Rattus norvegicus abhydrolase domain containing 2 (Abhd2), mRNA [NM_001106275]                                                         | <b>55,881</b> |
| Atg13      | Putative uncharacterized protein RGD1310685_predictedUncharacterized protein [Source:UniProtKB/TrEMBL;Acc:D3ZA45] [ENSRNOT00000023237] | <b>55,875</b> |
| Nptxr      | Rattus norvegicus neuronal pentraxin receptor (Nptxr), mRNA [NM_030841]                                                                | <b>55,874</b> |
| Lypd6b     | Rattus norvegicus LY6/PLAUR domain containing 6B (Lypd6b), mRNA [NM_001134580]                                                         | <b>55,824</b> |
| Rab8a      | Rattus norvegicus RAB8A, member RAS oncogene family (Rab8a), mRNA [NM_053998]                                                          | <b>55,664</b> |
| Dusp18     | Rattus norvegicus dual specificity phosphatase 18 (Dusp18), mRNA [NM_001013128]                                                        | <b>55,649</b> |
| Mospd3     | Rattus norvegicus motile sperm domain containing 3 (Mospd3), mRNA [NM_001025629]                                                       | <b>55,606</b> |
| Sv2a       | Rattus norvegicus synaptic vesicle glycoprotein 2a (Sv2a), mRNA [NM_057210]                                                            | <b>55,552</b> |
| Sirt6      | Rattus norvegicus sirtuin (silent mating type information regulation 2 homolog) 6 (S. cerevisiae) (Sirt6), mRNA [NM_001031649]         | <b>55,530</b> |
| 0          | Rattus norvegicus TL0ACA70YE02 mRNA sequence. [FQ224293]                                                                               | <b>55,499</b> |
| LOC690120  | PREDICTED: Rattus norvegicus hypothetical protein LOC690120 (LOC690120), miscRNA [XR_085881]                                           | <b>55,392</b> |
| Kif1c      | Rattus norvegicus kinesin family member 1C (Kif1c), mRNA [NM_145877]                                                                   | <b>55,381</b> |
| Hdgf       | Rattus norvegicus hepatoma-derived growth factor (Hdgf), mRNA [NM_053707]                                                              | <b>55,368</b> |

|            |                                                                                                                           |               |
|------------|---------------------------------------------------------------------------------------------------------------------------|---------------|
| Vwf        | von Willebrand factor [Source:UniProtKB/Swiss-Prot;Acc:Q62935] [ENSRNOT00000026643]                                       | <b>55,281</b> |
| Slc48a1    | Rattus norvegicus solute carrier family 48 (heme transporter), member 1 (Slc48a1), mRNA [NM_001127456]                    | <b>55,266</b> |
| RGD1564387 | PREDICTED: Rattus norvegicus similar to RIKEN cDNA C030014K22 gene (RGD1564387), mRNA [XM_002728030]                      | <b>55,251</b> |
| Lphn3      | Rattus norvegicus latrophilin 3 (Lphn3), mRNA [NM_130822]                                                                 | <b>55,196</b> |
| 0          | CITE4_MOUSE (Q9WUL8) Cbp/p300-interacting transactivator 4 (MSG1-related protein 2) (MRG-2), partial (8%) [TC620332]      | <b>55,114</b> |
| Abpa       | Rattus norvegicus androgen binding protein, alpha (Abpa), mRNA [NM_001100859]                                             | <b>55,004</b> |
| 0          | Uncharacterized protein [Source:UniProtKB/TrEMBL;Acc:D3ZTW2] [ENSRNOT00000036540]                                         | <b>54,909</b> |
| Dad1       | Rattus norvegicus defender against cell death 1 (Dad1), mRNA [NM_138910]                                                  | <b>54,892</b> |
| Tbl1x      | Rattus norvegicus transducin (beta)-like 1 X-linked (Tbl1x), mRNA [NM_001106964]                                          | <b>54,883</b> |
| 0          | Unknown                                                                                                                   | <b>54,878</b> |
| Ntsr2      | Rattus norvegicus neurotensin receptor 2 (Ntsr2), mRNA [NM_022695]                                                        | <b>54,862</b> |
| Papss2     | Rattus norvegicus 3'-phosphoadenosine 5'-phosphosulfate synthase 2 (Papss2), mRNA [NM_001106375]                          | <b>54,787</b> |
| LOC686590  | PREDICTED: Rattus norvegicus similar to IQ motif and Sec7 domain 1, transcript variant 2 (LOC686590), mRNA [XM_001073009] | <b>54,783</b> |
| LOC689226  | Rattus norvegicus similar to ubiquitin-conjugating enzyme E2R 2 (LOC689226), mRNA [NM_001127573]                          | <b>54,778</b> |
| Epas1      | Rattus norvegicus endothelial PAS domain protein 1 (Epas1), mRNA [NM_023090]                                              | <b>54,738</b> |
| Olr200     | Rattus norvegicus olfactory receptor 200 (Olr200), mRNA [NM_001000189]                                                    | <b>54,732</b> |
| Klhl7      | Rattus norvegicus kelch-like 7 (Drosophila) (Klhl7), mRNA [NM_001012187]                                                  | <b>54,631</b> |
| LOC688966  | Rattus norvegicus similar to K11B4.2 (LOC688966), mRNA [NM_001145726]                                                     | <b>54,583</b> |
| LOC498750  | Rattus norvegicus similar to cDNA sequence BC005537 (LOC498750), mRNA [NM_001017510]                                      | <b>54,571</b> |
| Hecw1      | Rattus norvegicus HECT, C2 and WW domain containing E3 ubiquitin protein ligase 1 (Hecw1), mRNA [NM_001106117]            | <b>54,525</b> |
| Slc6a1     | Rattus norvegicus solute carrier family 6 (neurotransmitter transporter, GABA), member 1 (Slc6a1), mRNA [NM_024371]       | <b>54,467</b> |
| 0          | Q8R3U9_MOUSE (Q8R3U9) Dlgap4 protein, partial (34%) [TC609401]                                                            | <b>54,320</b> |
| 0          | LOC100125365 protein [Source:UniProtKB/TrEMBL;Acc:Q5U2N5] [ENSRNOT00000051777]                                            | <b>54,291</b> |
| 0          | Unknown                                                                                                                   | <b>54,283</b> |
| Tshz3      | Rattus norvegicus teashirt zinc finger homeobox 3 (Tshz3), mRNA [NM_001107506]                                            | <b>54,258</b> |
| Sorcs2     | Rattus norvegicus sortilin-related VPS10 domain containing receptor 2 (Sorcs2), mRNA [NM_001107225]                       | <b>54,178</b> |
| Rab5b      | Rattus norvegicus RAB5B, member RAS oncogene family (Rab5b), mRNA [NM_001079936]                                          | <b>54,176</b> |
| Gltp       | Rattus norvegicus glycolipid transfer protein (Gltp), mRNA [NM_001134413]                                                 | <b>54,153</b> |
| Crks       | Rattus norvegicus Cdc2-related kinase, arginine/serine-rich (Crks), transcript variant 1, mRNA [NM_001033867]             | <b>54,040</b> |
| Cdc14b     | Rattus norvegicus CDC14 cell division cycle 14 homolog B (S. cerevisiae) (Cdc14b), mRNA [NM_001108404]                    | <b>53,839</b> |
| Sh2b2      | Rattus norvegicus SH2B adaptor protein 2 (Sh2b2), mRNA [NM_053669]                                                        | <b>53,829</b> |
| 0          | Rattus norvegicus TL0ADA49YG04 mRNA sequence. [FQ229104]                                                                  | <b>53,811</b> |
| Gatsl2     | Rattus norvegicus GATS protein-like 2 (Gatsl2), mRNA [NM_001100561]                                                       | <b>53,800</b> |
| Vom1r28    | Rattus norvegicus vomeronasal 1 receptor 28 (Vom1r28), mRNA [NM_001008966]                                                | <b>53,768</b> |

|            |                                                                                                                                                                                    |        |
|------------|------------------------------------------------------------------------------------------------------------------------------------------------------------------------------------|--------|
| Cend1      | Rattus norvegicus cell cycle exit and neuronal differentiation 1 (Cend1), mRNA [NM_001014163]                                                                                      | 53,712 |
| 0          | Ataxin 2 (Predicted)Uncharacterized protein [Source:UniProtKB/TrEMBL;Acc:D4A2N8] [ENSRNOT00000001691]                                                                              | 53,703 |
| Cplx1      | Rattus norvegicus complexin 1 (Cplx1), mRNA [NM_022864]                                                                                                                            | 53,654 |
| 0          | Q4T0B3_TETNG (Q4T0B3) Chromosome undetermined SCAF11265, whole genome shotgun sequence. (Fragment), partial (15%) [TC606852]                                                       | 53,440 |
| 0          | Unknown                                                                                                                                                                            | 53,429 |
| Eif2ak1    | Rattus norvegicus eukaryotic translation initiation factor 2 alpha kinase 1 (Eif2ak1), mRNA [NM_013223]                                                                            | 53,428 |
| RGD1564114 | Rattus norvegicus similar to FLJ46082 protein (RGD1564114), mRNA [NM_001127563]                                                                                                    | 53,423 |
| Sort1      | Rattus norvegicus sortilin 1 (Sort1), mRNA [NM_031767]                                                                                                                             | 53,412 |
| Acpl2      | Rattus norvegicus acid phosphatase-like 2 (Acpl2), mRNA [NM_001007710]                                                                                                             | 53,395 |
| LOC684841  | PREDICTED: Rattus norvegicus similar to CG31613-PA (LOC684841), mRNA [XM_001072155]                                                                                                | 53,377 |
| Map3k13    | Rattus norvegicus similar to mitogen-activated protein kinase kinase kinase 13; leucine zipper-bearing kinase, mRNA (cDNA clone MGC:94134 IMAGE:7127060), complete cds. [BC081976] | 53,342 |
| Sh3kbp1    | Rattus norvegicus SH3-domain kinase binding protein 1 (Sh3kbp1), mRNA [NM_053360]                                                                                                  | 53,292 |
| Mylk       | Rattus norvegicus myosin light chain kinase (Mylk), mRNA [NM_001105874]                                                                                                            | 53,243 |
| 0          | Cobl-like 1 Gene [Source:MGI Symbol;Acc:MGI:2442894] [ENSRNOT00000001606]                                                                                                          | 53,096 |
| 0          | Ras association (RalGDS/AF-6) and pleckstrin homology domains 1 (Predicted), isoform CRA_aUncharacterized protein [Source:UniProtKB/TrEMBL;Acc:D4ADX8] [ENSRNOT000000036194]       | 53,070 |
| LOC690286  | PREDICTED: Rattus norvegicus similar to hepatic leukemia factor (LOC690286), mRNA [XM_001073964]                                                                                   | 53,046 |
| 0          | Uncharacterized protein [Source:UniProtKB/TrEMBL;Acc:D3ZK71] [ENSRNOT000000041732]                                                                                                 | 52,903 |
| Nfix       | Rattus norvegicus nuclear factor I/X (CCAAT-binding transcription factor) (Nfix), mRNA [NM_030866]                                                                                 | 52,838 |
| Vps37c     | Rattus norvegicus vacuolar protein sorting 37 homolog C (S. cerevisiae) (Vps37c), mRNA [NM_001107463]                                                                              | 52,802 |
| Apba2      | Rattus norvegicus amyloid beta (A4) precursor protein-binding, family A, member 2 (Apba2), mRNA [NM_031780]                                                                        | 52,786 |
| Lgals3bp   | Rattus norvegicus lectin, galactoside-binding, soluble, 3 binding protein (Lgals3bp), mRNA [NM_139096]                                                                             | 52,643 |
| Atg9a      | Rattus norvegicus ATG9 autophagy related 9 homolog A (S. cerevisiae) (Atg9a), mRNA [NM_001014218]                                                                                  | 52,632 |
| LOC682920  | PREDICTED: Rattus norvegicus similar to phosphatase and actin regulator 4 (LOC682920), mRNA [XM_001063709]                                                                         | 52,615 |
| LOC686841  | Rattus norvegicus similar to Protein EAN57 (LOC686841), mRNA [NM_001044289]                                                                                                        | 52,602 |
| Zfp385b    | Rattus norvegicus zinc finger protein 385B (Zfp385b), mRNA [NM_001107736]                                                                                                          | 52,577 |
| 0          | Unknown                                                                                                                                                                            | 52,567 |
| Prp211     | Rat proline-rich protein (PRP-1) [Source:UniProtKB/TrEMBL;Acc:Q63455] [ENSRNOT00000004642]                                                                                         | 52,563 |
| Mect1      | Rattus norvegicus mucoepidermoid carcinoma translocated 1 (Mect1), mRNA [NM_001047115]                                                                                             | 52,529 |
| Atn1       | Rattus norvegicus atrophin 1 (Atn1), mRNA [NM_017228]                                                                                                                              | 52,474 |
| 0          | Uncharacterized protein [Source:UniProtKB/TrEMBL;Acc:D4ABJ0] [ENSRNOT000000028944]                                                                                                 | 52,442 |
| Gng3       | Rattus norvegicus guanine nucleotide binding protein (G protein), gamma 3 (Gng3), mRNA [NM_053658]                                                                                 | 52,405 |
| Fxyd1      | Rattus norvegicus FXYP domain-containing ion transport regulator 1 (Fxyd1), mRNA [NM_031648]                                                                                       | 52,311 |

|            |                                                                                                                                              |               |
|------------|----------------------------------------------------------------------------------------------------------------------------------------------|---------------|
| Jup        | Rattus norvegicus junction plakoglobin (Jup), mRNA [NM_031047]                                                                               | <b>52,283</b> |
| Rab1b      | Rattus norvegicus RAB1B, member RAS oncogene family (Rab1b), mRNA [NM_001109979]                                                             | <b>52,279</b> |
| LOC691918  | PREDICTED: Rattus norvegicus similar to Centrosomal protein of 27 kDa (Cep27 protein), transcript variant 2 (LOC691918), mRNA [XM_002726165] | <b>52,258</b> |
| RGD1564677 | PREDICTED: Rattus norvegicus similar to transcription factor ONECUT2 (RGD1564677), partial mRNA [XM_002725360]                               | <b>52,255</b> |
| Muc1       | Rattus norvegicus mucin 1, cell surface associated (Muc1), mRNA [NM_012602]                                                                  | <b>52,243</b> |
| 0          | Unknown                                                                                                                                      | <b>52,234</b> |
| Brd4       | Rattus norvegicus bromodomain containing 4 (Brd4), mRNA [NM_001100903]                                                                       | <b>52,229</b> |
| Repin1     | Rattus norvegicus replication initiator 1 (Repin1), mRNA [NM_001005893]                                                                      | <b>52,180</b> |
| 0          | Unknown                                                                                                                                      | <b>52,164</b> |
| RGD1564969 | PREDICTED: Rattus norvegicus similar to 60S ribosomal protein L29 (P23) (RGD1564969), mRNA [XM_002726901]                                    | <b>52,157</b> |
| 0          | Neurexin-3-alpha [Source:UniProtKB/Swiss-Prot;Acc:Q07310] [ENSRNOT00000032331]                                                               | <b>52,148</b> |
| 0          | host cell factor C1 regulator 1 [Source:RefSeq peptide;Acc:NP_001093962] [ENSRNOT00000004702]                                                | <b>52,032</b> |
| Atpbd4     | Rattus norvegicus ATP binding domain 4 (Atpbd4), mRNA [NM_001014181]                                                                         | <b>51,925</b> |
| Crebbp     | Rattus norvegicus CREB binding protein (Crebbp), mRNA [NM_133381]                                                                            | <b>51,915</b> |
| 0          | Unknown                                                                                                                                      | <b>51,861</b> |
| ldh3a      | Rattus norvegicus isocitrate dehydrogenase 3 (NAD+) alpha (ldh3a), nuclear gene encoding mitochondrial protein, mRNA [NM_053638]             | <b>51,857</b> |
| Arid1a     | Rattus norvegicus AT rich interactive domain 1A (SWI-like) (Arid1a), mRNA [NM_001106635]                                                     | <b>51,837</b> |
| Zfp385a    | Rattus norvegicus zinc finger protein 385A (Zfp385a), transcript variant 1, mRNA [NM_001135088]                                              | <b>51,781</b> |
| Wnk1       | Rattus norvegicus WNK lysine deficient protein kinase 1 (Wnk1), transcript variant 3, mRNA [NM_053794]                                       | <b>51,697</b> |
| Nol4       | Rattus norvegicus nucleolar protein 4 (Nol4), mRNA [NM_001107401]                                                                            | <b>51,670</b> |
| Manbal     | Rattus norvegicus mannosidase, beta A, lysosomal-like (Manbal), mRNA [NM_001173380]                                                          | <b>51,663</b> |
| Olig1      | Rattus norvegicus oligodendrocyte transcription factor 1 (Olig1), mRNA [NM_021770]                                                           | <b>51,620</b> |
| Hs1bp3     | PREDICTED: Rattus norvegicus HCLS1 binding protein 3, transcript variant 2 (Hs1bp3), mRNA [XM_233975]                                        | <b>51,580</b> |
| RGD1559896 | Rattus norvegicus similar to RIKEN cDNA 2310022B05 (RGD1559896), mRNA [NM_001109134]                                                         | <b>51,545</b> |
| Rhob       | Rattus norvegicus ras homolog gene family, member B (Rhob), mRNA [NM_022542]                                                                 | <b>51,542</b> |
| Crtap      | cartilage-associated protein [Source:RefSeq peptide;Acc:NP_001102255] [ENSRNOT00000013519]                                                   | <b>51,538</b> |
| 0          | Rattus norvegicus similar to ubiquitin-conjugating enzyme E2N (homologous to yeast UBC13); bendless protein (LOC301282), mRNA [XM_236973]    | <b>51,513</b> |
| Gnat1      | Rattus norvegicus guanine nucleotide binding protein (G protein), alpha transducing 1 (Gnat1), mRNA [NM_001108780]                           | <b>51,511</b> |
| Tnks1bp1   | Uncharacterized protein [Source:UniProtKB/TrEMBL;Acc:D3ZF26] [ENSRNOT00000012209]                                                            | <b>51,500</b> |
| Ei24       | Rattus norvegicus etoposide induced 2.4 mRNA (Ei24), mRNA [NM_001025660]                                                                     | <b>51,460</b> |
| Mgat5b     | Rattus norvegicus mannosyl (alpha-1,6-)-glycoprotein beta-1,6-N-acetyl-glucosaminyltransferase, isozyme B (Mgat5b), mRNA [NM_001107068]      | <b>51,348</b> |
| Tln1       | Rattus norvegicus talin 1 (Tln1), mRNA [NM_001039025]                                                                                        | <b>51,310</b> |



|              |                                                                                                                                  |               |
|--------------|----------------------------------------------------------------------------------------------------------------------------------|---------------|
| Mlf2         | Rattus norvegicus myeloid leukemia factor 2 (Mlf2), mRNA [NM_001107889]                                                          | <b>51,263</b> |
| Gchfr        | Rattus norvegicus GTP cyclohydrolase I feedback regulator (Gchfr), mRNA [NM_133595]                                              | <b>51,222</b> |
| Tacr3        | Rattus norvegicus tachykinin receptor 3 (Tacr3), mRNA [NM_017053]                                                                | <b>51,151</b> |
| Olr922       | Rattus norvegicus olfactory receptor 922 (Olr922), mRNA [NM_001000705]                                                           | <b>51,126</b> |
| 0            | Unknown                                                                                                                          | <b>51,123</b> |
| RGD1565591   | PREDICTED: Rattus norvegicus similar to Ski protein (RGD1565591), partial mRNA [XM_001077382]                                    | <b>51,081</b> |
| Ak3l1        | Rattus norvegicus adenylate kinase 3-like 1 (Ak3l1), nuclear gene encoding mitochondrial protein, mRNA [NM_017135]               | <b>51,014</b> |
| Nkain1       | PREDICTED: Rattus norvegicus similar to RIKEN cDNA 2610200G18 (RGD1561205), mRNA [XM_575920]                                     | <b>50,983</b> |
| Mark2        | Rattus norvegicus MAP/microtubule affinity-regulating kinase 2 (Mark2), mRNA [NM_021699]                                         | <b>50,859</b> |
| Mpped1       | Rattus norvegicus metallophosphoesterase domain containing 1 (Mpped1), mRNA [NM_001130569]                                       | <b>50,852</b> |
| Rarg         | Rattus norvegicus retinoic acid receptor, gamma (Rarg), transcript variant 1, mRNA [NM_001135249]                                | <b>50,841</b> |
| LOC685244    | PREDICTED: Rattus norvegicus similar to IQ motif and Sec7 domain 2, transcript variant 2 (LOC685244), mRNA [XM_002727538]        | <b>50,812</b> |
| Ccdc40       | Rattus norvegicus coiled-coil domain containing 40 (Ccdc40), mRNA [NM_001134688]                                                 | <b>50,803</b> |
| Mrpl40       | Rattus norvegicus mitochondrial ribosomal protein L40 (Mrpl40), nuclear gene encoding mitochondrial protein, mRNA [NM_001024865] | <b>50,791</b> |
| Tnr          | Rattus norvegicus tenascin R (Tnr), mRNA [NM_013045]                                                                             | <b>50,768</b> |
| 0            | Unknown                                                                                                                          | <b>50,746</b> |
| Reep3        | Rattus norvegicus receptor accessory protein 3 (Reep3), mRNA [NM_001106386]                                                      | <b>50,706</b> |
| Slc9a3r2     | Rattus norvegicus solute carrier family 9 (sodium/hydrogen exchanger), member 3 regulator 2 (Slc9a3r2), mRNA [NM_053811]         | <b>50,688</b> |
| Kcnp2        | Rattus norvegicus Kv channel-interacting protein 2 (Kcnp2), transcript variant a, mRNA [NM_020094]                               | <b>50,673</b> |
| 0            | Rattus norvegicus similar to 60S RIBOSOMAL PROTEIN L29 (P23) (LOC294697), mRNA [XM_226719]                                       | <b>50,670</b> |
| Rnasek       | Rattus norvegicus ribonuclease, RNase K (Rnasek), mRNA [NM_001137561]                                                            | <b>50,631</b> |
| Sike         | Rattus norvegicus suppressor of IKK epsilon (Sike), mRNA [NM_001012182]                                                          | <b>50,622</b> |
| Dnali1       | Rattus norvegicus dynein, axonemal, light intermediate chain 1 (Dnali1), mRNA [NM_001031647]                                     | <b>50,617</b> |
| Disp2        | Rattus norvegicus dispatched homolog 2 (Drosophila) (Disp2), mRNA [NM_001107759]                                                 | <b>50,607</b> |
| Sharpin      | Rattus norvegicus SHANK-associated RH domain interactor (Sharpin), mRNA [NM_031153]                                              | <b>50,603</b> |
| 0            | Unknown                                                                                                                          | <b>50,597</b> |
| 0            | Uncharacterized protein [Source:UniProtKB/TrEMBL;Acc:D4A3C4] [ENSRNOT00000067627]                                                | <b>50,595</b> |
| LOC100359980 | PREDICTED: Rattus norvegicus smooth muscle and non-muscle myosin alkali light chain 6B-like (LOC100359980), mRNA [XM_002726853]  | <b>50,554</b> |
| Oasl2        | Rattus norvegicus 2'-5' oligoadenylate synthetase-like 2 (Oasl2), mRNA [NM_001009682]                                            | <b>50,550</b> |
| Kcnj6        | Rattus norvegicus potassium inwardly-rectifying channel, subfamily J, member 6 (Kcnj6), mRNA [NM_013192]                         | <b>50,547</b> |
| Cnnm1        | Rattus norvegicus cyclin M1 (Cnnm1), mRNA [NM_001107593]                                                                         | <b>50,545</b> |
| RGD1305938   | Rattus norvegicus similar to expressed sequence AW549877 (RGD1305938), mRNA [NM_001134548]                                       | <b>50,525</b> |
| Apob48r      | Rattus norvegicus apolipoprotein B48 receptor (Apob48r), mRNA [NM_001109154]                                                     | <b>50,515</b> |
| Pcdh1        | PREDICTED: Rattus norvegicus protocadherin 1 (Pcdh1), partial mRNA [XM_225997]                                                   | <b>50,515</b> |

|              |                                                                                                                                                                  |               |
|--------------|------------------------------------------------------------------------------------------------------------------------------------------------------------------|---------------|
| Epb49        | Rattus norvegicus erythrocyte membrane protein band 4.9 (dematin) (Epb49), mRNA [NM_001108385]                                                                   | <b>50,459</b> |
| Guca2b       | Rattus norvegicus guanylate cyclase activator 2B (Guca2b), mRNA [NM_022284]                                                                                      | <b>50,418</b> |
| Nrep         | Rattus norvegicus neuronal regeneration related protein (Nrep), mRNA [NM_178096]                                                                                 | <b>50,413</b> |
| Zdhhc9       | Rattus norvegicus zinc finger, DHHC-type containing 9 (Zdhhc9), mRNA [NM_001039016]                                                                              | <b>50,374</b> |
| RGD1310571   | Rattus norvegicus similar to hypothetical protein (RGD1310571), mRNA [NM_001014147]                                                                              | <b>50,363</b> |
| Cdkn1a       | Rattus norvegicus cyclin-dependent kinase inhibitor 1A (Cdkn1a), mRNA [NM_080782]                                                                                | <b>50,323</b> |
| Gpr137       | Rattus norvegicus G protein-coupled receptor 137 (Gpr137), mRNA [NM_001109562]                                                                                   | <b>50,289</b> |
| 0            | Unknown                                                                                                                                                          | <b>50,276</b> |
| Pea15a       | Rattus norvegicus phosphoprotein enriched in astrocytes 15A (Pea15a), mRNA [NM_001013231]                                                                        | <b>50,218</b> |
| LOC100125364 | Rattus norvegicus hypothetical protein LOC100125364 (LOC100125364), mRNA [NM_001103356]                                                                          | <b>50,190</b> |
| RGD1311564   | Rattus norvegicus LOC360590 (RGD1311564), mRNA [NM_001108286]                                                                                                    | <b>50,184</b> |
| Tspan18      | Rattus norvegicus tetraspanin 18 (Tspan18), mRNA [NM_001107750]                                                                                                  | <b>50,180</b> |
| Arf4         | Rattus norvegicus ADP-ribosylation factor 4 (Arf4), mRNA [NM_024151]                                                                                             | <b>50,177</b> |
| Cited2       | Rattus norvegicus Cbp/p300-interacting transactivator, with Glu/Asp-rich carboxy-terminal domain, 2 (Cited2), mRNA [NM_053698]                                   | <b>50,152</b> |
| 0            | Uncharacterized protein [Source:UniProtKB/TrEMBL;Acc:D3ZC15] [ENSRNOT00000041970]                                                                                | <b>50,139</b> |
| Ptprt        | Rattus norvegicus protein tyrosine phosphatase, receptor type, T (Ptprt), mRNA [NM_001108603]                                                                    | <b>50,126</b> |
| Sbk1         | Rattus norvegicus SH3-binding domain kinase 1 (Sbk1), mRNA [NM_147135]                                                                                           | <b>50,116</b> |
| 0            | Unknown                                                                                                                                                          | <b>50,106</b> |
| Mink1        | PREDICTED: Rattus norvegicus similar to Map4k6-pending protein (LOC303259), mRNA [XM_001079459]                                                                  | <b>50,080</b> |
| Papola       | Rattus norvegicus poly (A) polymerase alpha (Papola), mRNA [NM_001108056]                                                                                        | <b>50,041</b> |
| 0            | Unknown                                                                                                                                                          | <b>50,036</b> |
| RGD1565685   | Rattus norvegicus similar to RIKEN cDNA 1810030O07 (RGD1565685), mRNA [NM_001126286]                                                                             | <b>50,030</b> |
| Cckbr        | Rattus norvegicus cholecystokinin B receptor (Cckbr), mRNA [NM_013165]                                                                                           | <b>49,906</b> |
| Kctd13       | Rattus norvegicus potassium channel tetramerisation domain containing 13 (Kctd13), mRNA [NM_198736]                                                              | <b>49,849</b> |
| Phf21b       | Rattus norvegicus PHD finger protein 21B (Phf21b), mRNA [NM_001130680]                                                                                           | <b>49,837</b> |
| 0            | Unknown                                                                                                                                                          | <b>49,795</b> |
| Trak1        | Rattus norvegicus trafficking protein, kinesin binding 1 (Trak1), mRNA [NM_001134565]                                                                            | <b>49,745</b> |
| Lsm12        | Rattus norvegicus LSM12 homolog (S. cerevisiae) (Lsm12), mRNA [NM_001105843]                                                                                     | <b>49,744</b> |
| Igf2bp2      | PREDICTED: Rattus norvegicus insulin-like growth factor 2 mRNA binding protein 2, transcript variant 2 (Igf2bp2), mRNA [XM_221343]                               | <b>49,731</b> |
| Atxn2l       | Rattus norvegicus ataxin 2-like (Atxn2l), mRNA [NM_001130097]                                                                                                    | <b>49,689</b> |
| Tpd52        | Rattus norvegicus tumor protein D52 (Tpd52), mRNA [NM_001106421]                                                                                                 | <b>49,665</b> |
| Astn1        | Rattus norvegicus astrotactin 1 (Astn1), mRNA [NM_001170603]                                                                                                     | <b>49,598</b> |
| Sema4g       | Rattus norvegicus sema domain, immunoglobulin domain (Ig), transmembrane domain (TM) and short cytoplasmic domain, (semaphorin) 4G (Sema4g), mRNA [NM_001108526] | <b>49,583</b> |

|            |                                                                                                                                                               |               |
|------------|---------------------------------------------------------------------------------------------------------------------------------------------------------------|---------------|
| 0          | Unknown                                                                                                                                                       | <b>49,569</b> |
| LOC683788  | Rattus norvegicus similar to Fascin (Singed-like protein) (LOC683788), mRNA [NM_001100806]                                                                    | <b>49,516</b> |
| Bgn        | Rattus norvegicus biglycan (Bgn), mRNA [NM_017087]                                                                                                            | <b>49,493</b> |
| Slc39a1    | Rattus norvegicus solute carrier family 39 (zinc transporter), member 1 (Slc39a1), mRNA [NM_001134577]                                                        | <b>49,447</b> |
| Alg3       | Rattus norvegicus asparagine-linked glycosylation 3, alpha-1,3- mannosyltransferase homolog (S. cerevisiae) (Alg3), transcript variant 1, mRNA [NM_001142363] | <b>49,442</b> |
| Tessp1     | Rattus norvegicus testis serine protease 1 (Tessp1), mRNA [NM_001135087]                                                                                      | <b>49,421</b> |
| Bmpr1a     | Rattus norvegicus bone morphogenetic protein receptor, type IA (Bmpr1a), mRNA [NM_030849]                                                                     | <b>49,419</b> |
| Cntn3      | Rattus norvegicus contactin 3 (plasmacytoma associated) (Cntn3), mRNA [NM_019329]                                                                             | <b>49,358</b> |
| Sirpa      | Rattus norvegicus signal-regulatory protein alpha (Sirpa), mRNA [NM_013016]                                                                                   | <b>49,348</b> |
| 0          | Unknown                                                                                                                                                       | <b>49,323</b> |
| RGD1310656 | RCG21340Uncharacterized protein [Source:UniProtKB/TrEMBL;Acc:D3ZL52] [ENSRNOT00000030600]                                                                     | <b>49,321</b> |
| 0          | Unknown                                                                                                                                                       | <b>49,318</b> |
| Ttyh3      | Rattus norvegicus tweety homolog 3 (Drosophila) (Ttyh3), mRNA [NM_001107124]                                                                                  | <b>49,306</b> |
| Fam134a    | PREDICTED: Rattus norvegicus family with sequence similarity 134, member A (Fam134a), mRNA [XM_001057799]                                                     | <b>49,293</b> |
| LOC298018  | AGENCOURT_113679838 NIH_MGC_431 Rattus norvegicus cDNA clone IMAGE:9092772 5', mRNA sequence [EV770462]                                                       | <b>49,232</b> |
| Arid3a     | Rattus norvegicus AT rich interactive domain 3A (Bright like) (Arid3a), mRNA [NM_001108066]                                                                   | <b>49,173</b> |
| 0          | Potassium voltage-gated channel subfamily D member 3 [Source:UniProtKB/Swiss-Prot;Acc:Q62897] [ENSRNOT00000051835]                                            | <b>49,158</b> |
| Olfm1      | Rattus norvegicus olfactomedin 1 (Olfm1), mRNA [NM_053573]                                                                                                    | <b>49,056</b> |
| Dnajb5     | Rattus norvegicus DnaJ (Hsp40) homolog, subfamily B, member 5 (Dnajb5), mRNA [NM_001108004]                                                                   | <b>49,051</b> |
| Cpeb4      | Rattus norvegicus cytoplasmic polyadenylation element binding protein 4 (Cpeb4), mRNA [NM_001106992]                                                          | <b>49,011</b> |
| 0          | Q6NUI3_HUMAN (Q6NUI3) Beta 3-glycosyltransferase-like, partial (23%) [TC629324]                                                                               | <b>48,971</b> |
| Srd5a3     | Rattus norvegicus steroid 5 alpha-reductase 3 (Srd5a3), mRNA [NM_001013990]                                                                                   | <b>48,962</b> |
| Notch1     | Rattus norvegicus Notch homolog 1, translocation-associated (Drosophila) (Notch1), mRNA [NM_001105721]                                                        | <b>48,932</b> |
| Slc35d1    | Rattus norvegicus solute carrier family 35 (UDP-glucuronic acid/UDP-N-acetylgalactosamine dual transporter), member D1 (Slc35d1), mRNA [NM_001106668]         | <b>48,930</b> |
| 0          | Unknown                                                                                                                                                       | <b>48,897</b> |
| 0          | Uncharacterized protein [Source:UniProtKB/TrEMBL;Acc:D4A1N7] [ENSRNOT00000056097]                                                                             | <b>48,808</b> |
| 0          | Unknown                                                                                                                                                       | <b>48,782</b> |
| Cald1      | Rattus norvegicus caldesmon 1 (Cald1), mRNA [NM_013146]                                                                                                       | <b>48,721</b> |
| Pde4a      | Rattus norvegicus phosphodiesterase 4A, cAMP-specific (phosphodiesterase E2 dunce homolog, Drosophila) (Pde4a), mRNA [NM_013101]                              | <b>48,704</b> |
| 0          | Unknown                                                                                                                                                       | <b>48,700</b> |
| Bruno15    | Rattus norvegicus bruno-like 5, RNA binding protein (Drosophila) (Bruno15), mRNA [NM_001135603]                                                               | <b>48,696</b> |
| Fam64a     | Rattus norvegicus family with sequence similarity 64, member A (Fam64a), mRNA [NM_001113781]                                                                  | <b>48,694</b> |

|            |                                                                                                                                    |        |
|------------|------------------------------------------------------------------------------------------------------------------------------------|--------|
| Lig3       | Rattus norvegicus ligase III, DNA, ATP-dependent (Lig3), nuclear gene encoding mitochondrial protein, mRNA [NM_001012011]          | 48,692 |
| Fam57b     | Rattus norvegicus family with sequence similarity 57, member B (Fam57b), mRNA [NM_001106296]                                       | 48,679 |
| LOC680802  | Rattus norvegicus TL0AAA71YE16 mRNA sequence. [FQ212058]                                                                           | 48,656 |
| Susd3      | Rattus norvegicus sushi domain containing 3 (Susd3), mRNA [NM_001107341]                                                           | 48,654 |
| RGD1309403 | Rattus norvegicus similar to hypothetical protein FLJ12661 (RGD1309403), mRNA [NM_001107676]                                       | 48,541 |
| Wasf1      | Rattus norvegicus WAS protein family, member 1 (Wasf1), mRNA [NM_001025114]                                                        | 48,529 |
| B4galnt1   | Rattus norvegicus beta-1,4-N-acetyl-galactosaminyl transferase 1 (B4galnt1), mRNA [NM_022860]                                      | 48,526 |
| LOC292722  | Uncharacterized protein [Source:UniProtKB/TrEMBL;Acc:D3Z9I0] [ENSRNOT00000027783]                                                  | 48,477 |
| Golph3l    | Rattus norvegicus golgi phosphoprotein 3-like (Golph3l), mRNA [NM_001007698]                                                       | 48,455 |
| Shank1     | Rattus norvegicus SH3 and multiple ankyrin repeat domains 1 (Shank1), mRNA [NM_031751]                                             | 48,294 |
| 0          | PREDICTED: Rattus norvegicus similar to 60S ribosomal protein L29 (P23) (RGD1562489), mRNA [XM_001071419]                          | 48,199 |
| Lynx1      | Rattus norvegicus Ly6/neurotoxin 1 (Lynx1), mRNA [NM_001130546]                                                                    | 48,060 |
| Fbxo46     | Rattus norvegicus F-box protein 46 (Fbxo46), mRNA [NM_001025642]                                                                   | 48,005 |
| Cd24       | Rattus norvegicus CD24 molecule (Cd24), mRNA [NM_012752]                                                                           | 47,963 |
| Dennd1a    | Rattus norvegicus DENN/MADD domain containing 1A (Dennd1a), mRNA [NM_001191747]                                                    | 47,962 |
| Olr371     | Rattus norvegicus olfactory receptor 371 (Olr371), mRNA [NM_001000258]                                                             | 47,950 |
| Xpr1       | Rattus norvegicus xenotropic and polytropic retrovirus receptor 1 (Xpr1), mRNA [NM_001105992]                                      | 47,950 |
| Hcfc1      | Rattus norvegicus host cell factor C1 (Hcfc1), mRNA [NM_001139507]                                                                 | 47,941 |
| Cotl1      | Rattus norvegicus coactosin-like 1 (Dictyostelium) (Cotl1), mRNA [NM_001108452]                                                    | 47,917 |
| Tmem71     | PREDICTED: Rattus norvegicus transmembrane protein 71 (Tmem71), mRNA [XM_001075116]                                                | 47,902 |
| Coro1c     | Rattus norvegicus coronin, actin binding protein 1C (Coro1c), mRNA [NM_001109327]                                                  | 47,900 |
| Wipf3      | Rattus norvegicus WAS/WASL interacting protein family, member 3 (Wipf3), mRNA [NM_147211]                                          | 47,900 |
| Col5a2     | Rattus norvegicus collagen, type V, alpha 2 (Col5a2), mRNA [NM_053488]                                                             | 47,883 |
| RGD1562582 | Rattus norvegicus similar to KIAA0406-like protein (RGD1562582), mRNA [NM_001134619]                                               | 47,879 |
| RGD1562865 | Rattus norvegicus similar to BTB and CNC homology 1, basic leucine zipper transcription factor 2 (RGD1562865), mRNA [NM_001135754] | 47,862 |
| Wdr41      | Rattus norvegicus WD repeat domain 41 (Wdr41), mRNA [NM_001108541]                                                                 | 47,810 |
| RGD1359158 | Rattus norvegicus similar to RIKEN cDNA 1110059E24 (RGD1359158), mRNA [NM_001007737]                                               | 47,801 |
| 0          | Unknown                                                                                                                            | 47,780 |
| Pbx1       | Rattus norvegicus pre-B-cell leukemia homeobox 1 (Pbx1), transcript variant 2, mRNA [NM_001100681]                                 | 47,778 |
| Sirt2      | Rattus norvegicus sirtuin (silent mating type information regulation 2 homolog) 2 (S. cerevisiae) (Sirt2), mRNA [NM_001008368]     | 47,765 |
| Vamp2      | Rattus norvegicus vesicle-associated membrane protein 2 (Vamp2), mRNA [NM_012663]                                                  | 47,748 |
| 0          | Unknown                                                                                                                            | 47,726 |
| Aplp2      | PREDICTED: Rattus norvegicus amyloid beta (A4) precursor-like protein 2 (Aplp2), mRNA [XM_343513]                                  | 47,721 |
| Rilp       | Rattus norvegicus Rab interacting lysosomal protein (Rilp), mRNA [NM_001105811]                                                    | 47,668 |

|            |                                                                                                                                                                                             |               |
|------------|---------------------------------------------------------------------------------------------------------------------------------------------------------------------------------------------|---------------|
| Neurod2    | Rattus norvegicus neurogenic differentiation 2 (Neurod2), mRNA [NM_019326]                                                                                                                  | <b>47,649</b> |
| Csgalnact1 | Rattus norvegicus chondroitin sulfate N-acetylgalactosaminyltransferase 1 (Csgalnact1), mRNA [NM_001107309]                                                                                 | <b>47,646</b> |
| Mras       | Rattus norvegicus muscle RAS oncogene homolog (Mras), mRNA [NM_012981]                                                                                                                      | <b>47,636</b> |
| 0          | Sema domain, transmembrane domain (TM), and cytoplasmic domain, (Semaphorin) 6A (Predicted), isoform CRA_aUncharacterized protein [Source:UniProtKB/TrEMBL;Acc:D3ZAG0] [ENSRNOT00000005476] | <b>47,590</b> |
| Tox        | Rattus norvegicus thymocyte selection-associated high mobility group box (Tox), mRNA [NM_001108654]                                                                                         | <b>47,589</b> |
| Ssh2       | Rattus norvegicus slingshot homolog 2 (Drosophila) (Ssh2), mRNA [NM_001107024]                                                                                                              | <b>47,509</b> |
| Tmem131    | Uncharacterized protein [Source:UniProtKB/TrEMBL;Acc:D4A2I0] [ENSRNOT00000006288]                                                                                                           | <b>47,503</b> |
| Tbc1d9     | Rattus norvegicus TBC1 domain family, member 9 (Tbc1d9), mRNA [NM_001134539]                                                                                                                | <b>47,496</b> |
| Cmb1       | Rattus norvegicus carboxymethylenebutenolidase homolog (Pseudomonas) (Cmb1), mRNA [NM_001008770]                                                                                            | <b>47,480</b> |
| Zbtb7a     | Rattus norvegicus zinc finger and BTB domain containing 7a (Zbtb7a), mRNA [NM_054002]                                                                                                       | <b>47,474</b> |
| Ccdc92     | Rattus norvegicus coiled-coil domain containing 92 (Ccdc92), mRNA [NM_001083898]                                                                                                            | <b>47,461</b> |
| Dnajb12    | Rattus norvegicus DnaJ (Hsp40) homolog, subfamily B, member 12 (Dnajb12), mRNA [NM_001013907]                                                                                               | <b>47,453</b> |
| Reep5      | Rattus norvegicus receptor accessory protein 5 (Reep5), mRNA [NM_001108888]                                                                                                                 | <b>47,428</b> |
| 0          | Uncharacterized protein [Source:UniProtKB/TrEMBL;Acc:D3ZXW1] [ENSRNOT000000030613]                                                                                                          | <b>47,406</b> |
| Icam1      | Rattus norvegicus intercellular adhesion molecule 1 (Icam1), mRNA [NM_012967]                                                                                                               | <b>47,395</b> |
| 0          | Q8VDS2_MOUSE (Q8VDS2) Tll3 protein, partial (38%) [TC587171]                                                                                                                                | <b>47,348</b> |
| Fhl1       | Rattus norvegicus four and a half LIM domains 1 (Fhl1), transcript variant 1, mRNA [NM_001033926]                                                                                           | <b>47,336</b> |
| 0          | Unknown                                                                                                                                                                                     | <b>47,291</b> |
| Sorbs3     | Rattus norvegicus sorbin and SH3 domain containing 3 (Sorbs3), mRNA [NM_001005762]                                                                                                          | <b>47,276</b> |
| 0          | Unknown                                                                                                                                                                                     | <b>47,252</b> |
| Pole3      | Rattus norvegicus polymerase (DNA directed), epsilon 3 (p17 subunit) (Pole3), mRNA [NM_001007652]                                                                                           | <b>47,245</b> |
| 0          | Uncharacterized protein [Source:UniProtKB/TrEMBL;Acc:D3ZJX9] [ENSRNOT000000057090]                                                                                                          | <b>47,236</b> |
| Shank3     | Rattus norvegicus SH3 and multiple ankyrin repeat domains 3 (Shank3), mRNA [NM_021676]                                                                                                      | <b>47,225</b> |
| Pmepa1     | prostate transmembrane protein, androgen induced 1 [Source:RefSeq peptide;Acc:NP_001101277] [ENSRNOT00000008261]                                                                            | <b>47,216</b> |
| Ipo9       | Rattus norvegicus importin 9 (Ipo9), mRNA [NM_001107180]                                                                                                                                    | <b>47,204</b> |
| Kcnh4      | Rattus norvegicus potassium voltage-gated channel, subfamily H (eag-related), member 4 (Kcnh4), mRNA [NM_053630]                                                                            | <b>47,185</b> |
| RGD1564943 | Rattus norvegicus similar to 4930429A08Rik protein (RGD1564943), mRNA [NM_001134628]                                                                                                        | <b>47,183</b> |
| Mobk11a    | Rattus norvegicus MOB1, Mps One Binder kinase activator-like 1A (yeast) (Mobk11a), mRNA [NM_001108357]                                                                                      | <b>47,166</b> |
| RGD1305899 | PREDICTED: Rattus norvegicus similar to Protein C20orf158 (RGD1305899), mRNA [XM_001058977]                                                                                                 | <b>47,164</b> |
| Fam168a    | Rattus norvegicus family with sequence similarity 168, member A (Fam168a), mRNA [NM_001108494]                                                                                              | <b>47,144</b> |
| Slc7a8     | Rattus norvegicus solute carrier family 7 (cationic amino acid transporter, y+ system), member 8 (Slc7a8), mRNA [NM_053442]                                                                 | <b>47,115</b> |
| Atp6v0e2   | Rattus norvegicus ATPase, H+ transporting V0 subunit e2 (Atp6v0e2), mRNA [NM_001002253]                                                                                                     | <b>47,067</b> |
| 0          | Q14610_HUMAN (Q14610) Interferon-gamma variant, partial (12%) [TC620342]                                                                                                                    | <b>47,051</b> |

|            |                                                                                                                                                   |               |
|------------|---------------------------------------------------------------------------------------------------------------------------------------------------|---------------|
| Gosr1      | Rattus norvegicus golgi SNAP receptor complex member 1 (Gosr1), mRNA [NM_053584]                                                                  | <b>47,048</b> |
| 0          | Q3QX63_9RHOB (Q3QX63) Phage baseplate assembly protein V, partial (10%) [TC626448]                                                                | <b>47,040</b> |
| 0          | Centrosomal protein 1 (Predicted)Uncharacterized protein [Source:UniProtKB/TrEMBL;Acc:D3ZRZ3] [ENSRNOT00000007906]                                | <b>47,021</b> |
| Gjb2       | Rattus norvegicus gap junction protein, beta 2 (Gjb2), mRNA [NM_001004099]                                                                        | <b>46,975</b> |
| Dolpp1     | Rattus norvegicus dolichyl pyrophosphate phosphatase 1 (Dolpp1), mRNA [NM_001106567]                                                              | <b>46,908</b> |
| 0          | Unknown                                                                                                                                           | <b>46,904</b> |
| Rab33b     | Rattus norvegicus RAB33B, member of RAS oncogene family (Rab33b), mRNA [NM_001108944]                                                             | <b>46,867</b> |
| Crip2      | Rattus norvegicus cysteine-rich protein 2 (Crip2), mRNA [NM_022501]                                                                               | <b>46,837</b> |
| Brsk2      | PREDICTED: Rattus norvegicus brain serine/threonine kinase 2 (Brsk2), mRNA [XM_219498]                                                            | <b>46,830</b> |
| Tmem151a   | Rattus norvegicus transmembrane protein 151A (Tmem151a), mRNA [NM_001107570]                                                                      | <b>46,808</b> |
| Olig2      | Rattus norvegicus oligodendrocyte lineage transcription factor 2 (Olig2), mRNA [NM_001100557]                                                     | <b>46,780</b> |
| 0          | DNA-directed RNA polymerase [Source:UniProtKB/TrEMBL;Acc:D3ZGF8] [ENSRNOT00000046484]                                                             | <b>46,749</b> |
| RGD1561113 | Uncharacterized protein [Source:UniProtKB/TrEMBL;Acc:D3ZBT2] [ENSRNOT00000034930]                                                                 | <b>46,736</b> |
| Arf2       | Rattus norvegicus ADP-ribosylation factor 2 (Arf2), mRNA [NM_024150]                                                                              | <b>46,727</b> |
| Stx1b      | Syntaxin-1B [Source:UniProtKB/Swiss-Prot;Acc:P61265] [ENSRNOT00000026063]                                                                         | <b>46,671</b> |
| Efnb3      | Rattus norvegicus ephrin B3 (Efnb3), mRNA [NM_001100980]                                                                                          | <b>46,627</b> |
| Pou2f1     | Rattus norvegicus POU class 2 homeobox 1 (Pou2f1), mRNA [NM_001100639]                                                                            | <b>46,592</b> |
| 0          | Nope protein [Source:UniProtKB/TrEMBL;Acc:B5DFA9] [ENSRNOT00000040854]                                                                            | <b>46,583</b> |
| Srgap2     | Rattus norvegicus TL0AAA55YK04 mRNA sequence. [FQ212420]                                                                                          | <b>46,569</b> |
| Ino80d     | Rattus norvegicus INO80 complex subunit D (Ino80d), mRNA [NM_001191809]                                                                           | <b>46,569</b> |
| Fam117a    | Rattus norvegicus family with sequence similarity 117, member A (Fam117a), mRNA [NM_001109039]                                                    | <b>46,542</b> |
| LOC679462  | Rattus norvegicus similar to Tetraspanin-15 (Tspan-15) (Transmembrane 4 superfamily member 15) (Tetraspan NET-7) (LOC679462), mRNA [NM_001115032] | <b>46,346</b> |
| Ino80c     | Rattus norvegicus INO80 complex subunit C (Ino80c), mRNA [NM_001017446]                                                                           | <b>46,221</b> |
| Map1b      | Rattus norvegicus microtubule-associated protein 1B (Map1b), mRNA [NM_019217]                                                                     | <b>46,200</b> |
| RGD1310127 | Rattus norvegicus similar to cDNA sequence BC017158 (RGD1310127), mRNA [NM_001035517]                                                             | <b>46,155</b> |
| 0          | Unknown                                                                                                                                           | <b>46,126</b> |
| 0          | Unknown                                                                                                                                           | <b>46,114</b> |
| Olr569     | Rattus norvegicus olfactory receptor 569 (Olr569), mRNA [NM_001000664]                                                                            | <b>46,079</b> |
| Cxxc5      | Rattus norvegicus CXXC finger 5 (Cxxc5), mRNA [NM_001007628]                                                                                      | <b>46,040</b> |
| Arhgdia    | Rattus norvegicus Rho GDP dissociation inhibitor (GDI) alpha (Arhgdia), mRNA [NM_001007005]                                                       | <b>46,023</b> |
| Tmem9      | Rattus norvegicus transmembrane protein 9 (Tmem9), mRNA [NM_001105953]                                                                            | <b>46,023</b> |
| Ubl7       | Rattus norvegicus ubiquitin-like 7 (bone marrow stromal cell-derived) (Ubl7), mRNA [NM_001004247]                                                 | <b>45,997</b> |
| Scly       | Rattus norvegicus selenocysteine lyase (Scly), mRNA [NM_001007755]                                                                                | <b>45,994</b> |

|              |                                                                                                                               |               |
|--------------|-------------------------------------------------------------------------------------------------------------------------------|---------------|
| 0            | Unknown                                                                                                                       | <b>45,992</b> |
| Efhd1        | Rattus norvegicus EF-hand domain family, member D1 (Efhd1), mRNA [NM_001109310]                                               | <b>45,978</b> |
| Atf6         | Rattus norvegicus activating transcription factor 6 (Atf6), mRNA [NM_001107196]                                               | <b>45,898</b> |
| 0            | NADH-ubiquinone oxidoreductase chain 4L [Source:UniProtKB/Swiss-Prot;Acc:P05507] [ENSRNOT00000044582]                         | <b>45,881</b> |
| Ypel4        | Rattus norvegicus yippee-like 4 (Drosophila) (Ypel4), mRNA [NM_001024369]                                                     | <b>45,868</b> |
| Slc38a3      | Rattus norvegicus solute carrier family 38, member 3 (Slc38a3), mRNA [NM_145776]                                              | <b>45,807</b> |
| Rnf208       | Rattus norvegicus ring finger protein 208 (Rnf208), mRNA [NM_001109195]                                                       | <b>45,725</b> |
| RGD1564836   | Uncharacterized protein [Source:UniProtKB/TrEMBL;Acc:D3ZAX1] [ENSRNOT00000038940]                                             | <b>45,716</b> |
| Pip4k2a      | Rattus norvegicus phosphatidylinositol-5-phosphate 4-kinase, type II, alpha (Pip4k2a), mRNA [NM_053926]                       | <b>45,686</b> |
| Ly6g6c       | Rattus norvegicus lymphocyte antigen 6 complex, locus G6C (Ly6g6c), mRNA [NM_001001969]                                       | <b>45,679</b> |
| Ube2v1       | Rattus norvegicus ubiquitin-conjugating enzyme E2 variant 1 (Ube2v1), mRNA [NM_001110345]                                     | <b>45,673</b> |
| Nfasc        | Rattus norvegicus neurofascin (Nfasc), transcript variant 1, mRNA [NM_001160314]                                              | <b>45,668</b> |
| Tom1         | Rattus norvegicus target of myb1 homolog (chicken) (Tom1), mRNA [NM_001008365]                                                | <b>45,652</b> |
| Klf3         | Rattus norvegicus Kruppel-like factor 3 (basic) (Klf3), mRNA [NM_001105742]                                                   | <b>45,637</b> |
| Hnrnpul1     | Rattus norvegicus heterogeneous nuclear ribonucleoprotein U-like 1 (Hnrnpul1), mRNA [NM_001108477]                            | <b>45,637</b> |
| Shroom2      | Rattus norvegicus shroom family member 2 (Shroom2), mRNA [NM_001047893]                                                       | <b>45,634</b> |
| LOC100366259 | PREDICTED: Rattus norvegicus rCG52099-like (LOC100366259), mRNA [XM_002725118]                                                | <b>45,630</b> |
| 0            | Rattus norvegicus polycystic kidney disease 1 homolog (Pkd1), mRNA [XM_340765]                                                | <b>45,619</b> |
| 0            | Unknown                                                                                                                       | <b>45,594</b> |
| Prps2        | Rattus norvegicus phosphoribosyl pyrophosphate synthetase 2 (Prps2), mRNA [NM_012634]                                         | <b>45,576</b> |
| Ugt1a6       | Rattus norvegicus UDP glucuronosyltransferase 1 family, polypeptide A6 (Ugt1a6), transcript variant 1, mRNA [NM_001039691]    | <b>45,573</b> |
| Ino80e       | Rattus norvegicus INO80 complex subunit E (Ino80e), mRNA [NM_001013900]                                                       | <b>45,501</b> |
| Praf2        | Rattus norvegicus PRA1 domain family, member 2 (Praf2), mRNA [NM_001109013]                                                   | <b>45,491</b> |
| 0            | Rattus norvegicus similar to 60S RIBOSOMAL PROTEIN L29 (P23) (LOC292938), mRNA [XM_218668]                                    | <b>45,449</b> |
| Slc13a2      | Rattus norvegicus solute carrier family 13 (sodium-dependent dicarboxylate transporter), member 2 (Slc13a2), mRNA [NM_031746] | <b>45,444</b> |
| Ddah1        | Rattus norvegicus dimethylarginine dimethylaminohydrolase 1 (Ddah1), mRNA [NM_022297]                                         | <b>45,433</b> |
| Fam100b      | PREDICTED: Rattus norvegicus family with sequence similarity 100, member B (Fam100b), mRNA [XM_213532]                        | <b>45,418</b> |
| 0            | Uncharacterized protein [Source:UniProtKB/TrEMBL;Acc:D3ZRD4] [ENSRNOT00000054998]                                             | <b>45,414</b> |
| Zfp36l1      | Rattus norvegicus zinc finger protein 36, C3H type-like 1 (Zfp36l1), mRNA [NM_017172]                                         | <b>45,361</b> |
| Reep6        | Rattus norvegicus receptor accessory protein 6 (Reep6), mRNA [NM_001013218]                                                   | <b>45,355</b> |
| Optn         | Rattus norvegicus optineurin (Optn), mRNA [NM_145081]                                                                         | <b>45,248</b> |
| Ubqln2       | Rattus norvegicus ubiquilin 2 (Ubqln2), mRNA [NM_001108251]                                                                   | <b>45,246</b> |
| 0            | Unknown                                                                                                                       | <b>45,242</b> |
| Tob2         | Rattus norvegicus transducer of ERBB2, 2 (Tob2), mRNA [NM_001007146]                                                          | <b>45,236</b> |

|            |                                                                                                                                       |        |
|------------|---------------------------------------------------------------------------------------------------------------------------------------|--------|
| Zfp385a    | Rattus norvegicus zinc finger protein 385A (Zfp385a), transcript variant 1, mRNA [NM_001135088]                                       | 45,176 |
| Kctd4      | Rattus norvegicus potassium channel tetramerisation domain containing 4 (Kctd4), mRNA [NM_001109650]                                  | 45,171 |
| Npepps     | Rattus norvegicus aminopeptidase puromycin sensitive (Npepps), mRNA [NM_080395]                                                       | 45,152 |
| Rnf165     | Rattus norvegicus ring finger protein 165 (Rnf165), mRNA [NM_001164505]                                                               | 45,150 |
| Ap3m1      | Rattus norvegicus adaptor-related protein complex 3, mu 1 subunit (Ap3m1), mRNA [NM_133593]                                           | 45,133 |
| Ncstn      | Rattus norvegicus nicastrin (Ncstn), mRNA [NM_174864]                                                                                 | 45,101 |
| Scn3b      | Rattus norvegicus sodium channel, voltage-gated, type III, beta (Scn3b), mRNA [NM_139097]                                             | 45,060 |
| Fam128b    | Rattus norvegicus family with sequence similarity 128, member B (Fam128b), mRNA [NM_001105860]                                        | 45,046 |
| Mknk1      | Rattus norvegicus MAP kinase-interacting serine/threonine kinase 1 (Mknk1), mRNA [NM_001044267]                                       | 45,040 |
| 0          | Q2I375_HUMAN (Q2I375) QKI, partial (64%) [TC627221]                                                                                   | 45,027 |
| Kcng1      | Rattus norvegicus potassium voltage-gated channel, subfamily G, member 1 (Kcng1), mRNA [NM_001106545]                                 | 44,999 |
| Spata2L    | Rattus norvegicus spermatogenesis associated 2-like (Spata2L), mRNA [NM_001109133]                                                    | 44,991 |
| Mrpl10     | Rattus norvegicus mitochondrial ribosomal protein L10 (Mrpl10), nuclear gene encoding mitochondrial protein, mRNA [NM_001109620]      | 44,976 |
| 0          | Unknown                                                                                                                               | 44,969 |
| LOC304558  | PREDICTED: Rattus norvegicus similar to TPR repeat-containing protein KIAA1043 (LOC304558), mRNA [XM_222260]                          | 44,909 |
| Sepw1      | Rattus norvegicus selenoprotein W, 1 (Sepw1), mRNA [NM_013027]                                                                        | 44,901 |
| Cbara1     | Rattus norvegicus calcium binding atopy-related autoantigen 1 (Cbara1), nuclear gene encoding mitochondrial protein, mRNA [NM_199412] | 44,859 |
| Ube2g1     | Rattus norvegicus ubiquitin-conjugating enzyme E2G 1 (UBC7 homolog, yeast) (Ube2g1), mRNA [NM_022690]                                 | 44,847 |
| Gsk3a      | Rattus norvegicus glycogen synthase kinase 3 alpha (Gsk3a), mRNA [NM_017344]                                                          | 44,819 |
| Vcl        | Rattus norvegicus vinculin (Vcl), mRNA [NM_001107248]                                                                                 | 44,811 |
| Pa2g4      | Rattus norvegicus proliferation-associated 2G4 (Pa2g4), mRNA [NM_001004206]                                                           | 44,808 |
| RGD621098  | Rattus norvegicus similar to RIKEN cDNA D230025D16Rik (RGD621098), mRNA [NM_139040]                                                   | 44,775 |
| Lnx2       | Rattus norvegicus ligand of numb-protein X 2 (Lnx2), mRNA [NM_001108329]                                                              | 44,726 |
| Rnf166     | Rattus norvegicus ring finger protein 166 (Rnf166), mRNA [NM_001002279]                                                               | 44,718 |
| Tp53inp2   | PREDICTED: Rattus norvegicus tumor protein p53 inducible nuclear protein 2 (Trp53inp2), mRNA [XM_001074013]                           | 44,681 |
| RGD1560471 | Rattus norvegicus similar to hypothetical protein 4933429F08 (RGD1560471), mRNA [NM_001100974]                                        | 44,665 |
| Gatad2a    | Rattus norvegicus GATA zinc finger domain containing 2A (Gatad2a), mRNA [NM_001013881]                                                | 44,650 |
| Zfp358     | Rattus norvegicus zinc finger protein 358 (Zfp358), mRNA [NM_001108328]                                                               | 44,643 |
| Spred2     | Rattus norvegicus sprouty-related, EVH1 domain containing 2 (Spred2), mRNA [NM_001047094]                                             | 44,629 |
| Lppr5      | Rattus norvegicus lipid phosphate phosphatase-related protein type 5 (Lppr5), mRNA [NM_001107720]                                     | 44,558 |
| 0          | Rattus norvegicus cDNA clone IMAGE:7367251. [BC167759]                                                                                | 44,536 |
| Atp6v0a1   | Rattus norvegicus ATPase, H <sup>+</sup> transporting, lysosomal V0 subunit A1 (Atp6v0a1), mRNA [NM_031604]                           | 44,482 |
| Zyx        | Rattus norvegicus zyxin (Zyx), mRNA [NM_053761]                                                                                       | 44,468 |
| Cacng3     | Rattus norvegicus calcium channel, voltage-dependent, gamma subunit 3 (Cacng3), mRNA [NM_080691]                                      | 44,415 |



|           |                                                                                                                                                                            |               |
|-----------|----------------------------------------------------------------------------------------------------------------------------------------------------------------------------|---------------|
| Lppr4     | Rattus norvegicus lipid phosphate phosphatase-related protein type 4 (Lppr4), mRNA [NM_001001508]                                                                          | <b>44,406</b> |
| Arf3      | Rattus norvegicus ADP-ribosylation factor 3 (Arf3), mRNA [NM_080904]                                                                                                       | <b>44,403</b> |
| Nbl1      | Rattus norvegicus neuroblastoma, suppression of tumorigenicity 1 (Nbl1), mRNA [NM_031609]                                                                                  | <b>44,396</b> |
| Phlda1    | Rattus norvegicus pleckstrin homology-like domain, family A, member 1 (Phlda1), mRNA [NM_017180]                                                                           | <b>44,365</b> |
| Megf9     | Rattus norvegicus multiple EGF-like-domains 9 (Megf9), mRNA [NM_001107940]                                                                                                 | <b>44,360</b> |
| 0         | Unknown                                                                                                                                                                    | <b>44,336</b> |
| 0         | Unknown                                                                                                                                                                    | <b>44,312</b> |
| Neo1      | PREDICTED: Rattus norvegicus neogenin homolog 1 (chicken) (Neo1), mRNA [XM_001074913]                                                                                      | <b>44,279</b> |
| Rtkn      | Rattus norvegicus rhotekin (Rtkn), mRNA [NM_184046]                                                                                                                        | <b>44,260</b> |
| Cacnb4    | Rattus norvegicus calcium channel, voltage-dependent, beta 4 subunit (Cacnb4), mRNA [NM_001105733]                                                                         | <b>44,235</b> |
| Shank1    | Rattus norvegicus SH3 and multiple ankyrin repeat domains 1 (Shank1), mRNA [NM_031751]                                                                                     | <b>44,223</b> |
| 0         | abl interactor 2 [Source:RefSeq peptide;Acc:NP_775166] [ENSRNOT00000058341]                                                                                                | <b>44,213</b> |
| Sfxn1     | Rattus norvegicus sideroflexin 1 (Sfxn1), mRNA [NM_001012213]                                                                                                              | <b>44,209</b> |
| Layn      | Rattus norvegicus layilin (Layn), mRNA [NM_001191997]                                                                                                                      | <b>44,164</b> |
| Limk1     | Rattus norvegicus LIM domain kinase 1 (Limk1), mRNA [NM_031727]                                                                                                            | <b>44,164</b> |
| Aldh9a1   | Rattus norvegicus aldehyde dehydrogenase 9 family, member A1 (Aldh9a1), mRNA [NM_022273]                                                                                   | <b>44,141</b> |
| Fam70b    | Rattus norvegicus family with sequence similarity 70, member B (Fam70b), mRNA [NM_001106094]                                                                               | <b>44,140</b> |
| Cbfa2t3   | Rattus norvegicus core-binding factor, runt domain, alpha subunit 2; translocated to, 3 (Cbfa2t3), mRNA [NM_001108453]                                                     | <b>44,136</b> |
| Asb13     | Rattus norvegicus ankyrin repeat and SOCS box-containing 13 (Asb13), mRNA [NM_001108420]                                                                                   | <b>44,123</b> |
| 0         | Rattus norvegicus similar to 60S RIBOSOMAL PROTEIN L29 (P23) (LOC364407), mRNA [XM_344423]                                                                                 | <b>44,041</b> |
| Pcsk4     | Rattus norvegicus proprotein convertase subtilisin/kexin type 4 (Pcsk4), mRNA [NM_133559]                                                                                  | <b>44,026</b> |
| Nova1     | RNA-binding protein Nova-1 [Source:UniProtKB/Swiss-Prot;Acc:Q80WA4] [ENSRNOT00000050372]                                                                                   | <b>44,024</b> |
| Mmp24     | Rattus norvegicus matrix metalloproteinase 24 (Mmp24), mRNA [NM_031757]                                                                                                    | <b>44,001</b> |
| LOC685179 | PREDICTED: Rattus norvegicus similar to SWI/SNF-related matrix-associated actin-dependent regulator of chromatin c2, transcript variant 4 (LOC685179), mRNA [XM_001055795] | <b>43,995</b> |
| Pdpn      | Rattus norvegicus podoplanin (Pdpn), mRNA [NM_019358]                                                                                                                      | <b>43,971</b> |
| Pus7l     | PREDICTED: Rattus norvegicus pseudouridylylase synthase 7 homolog (S. cerevisiae)-like (Pus7l), mRNA [XM_001058268]                                                        | <b>43,962</b> |
| 0         | Unknown                                                                                                                                                                    | <b>43,907</b> |
| Foxj2     | Rattus norvegicus forkhead box J2 (Foxj2), mRNA [NM_001109352]                                                                                                             | <b>43,873</b> |
| Prkca     | Rattus norvegicus protein kinase C, alpha (Prkca), mRNA [NM_001105713]                                                                                                     | <b>43,859</b> |
| Calhm3    | Rattus norvegicus calcium homeostasis modulator 3 (Calhm3), mRNA [NM_001191956]                                                                                            | <b>43,820</b> |
| Hapln1    | Rattus norvegicus hyaluronan and proteoglycan link protein 1 (Hapln1), mRNA [NM_019189]                                                                                    | <b>43,800</b> |
| Eefsec    | Rattus norvegicus eukaryotic elongation factor, selenocysteine-tRNA-specific (Eefsec), mRNA [NM_001109249]                                                                 | <b>43,792</b> |
| Trim46    | Rattus norvegicus tripartite motif-containing 46 (Trim46), mRNA [NM_001107691]                                                                                             | <b>43,791</b> |

|           |                                                                                                                      |               |
|-----------|----------------------------------------------------------------------------------------------------------------------|---------------|
| S100a16   | Rattus norvegicus S100 calcium binding protein A16 (S100a16), mRNA [NM_001108557]                                    | <b>43,764</b> |
| 0         | Unknown                                                                                                              | <b>43,707</b> |
| Ccdc91    | Rattus norvegicus coiled-coil domain containing 91 (Ccdc91), mRNA [NM_001014061]                                     | <b>43,687</b> |
| Cbs       | Rattus norvegicus cystathionine beta synthase (Cbs), mRNA [NM_012522]                                                | <b>43,670</b> |
| Zswim4    | Rattus norvegicus zinc finger, SWIM-type containing 4 (Zswim4), mRNA [NM_001107163]                                  | <b>43,662</b> |
| Ncoa4     | Rattus norvegicus nuclear receptor coactivator 4 (Ncoa4), transcript variant 2, mRNA [NM_001034008]                  | <b>43,653</b> |
| Nudt2     | Rattus norvegicus nudix (nucleoside diphosphate linked moiety X)-type motif 2 (Nudt2), mRNA [NM_207596]              | <b>43,619</b> |
| Zfp583    | Rattus norvegicus zinc finger protein 583 (Zfp583), mRNA [NM_001134609]                                              | <b>43,597</b> |
| 0         | Unknown                                                                                                              | <b>43,587</b> |
| LOC685249 | PREDICTED: Rattus norvegicus hypothetical protein LOC685249 (LOC685249), mRNA [XM_001063008]                         | <b>43,561</b> |
| Atf5      | Rattus norvegicus activating transcription factor 5 (Atf5), mRNA [NM_172336]                                         | <b>43,550</b> |
| Pclo      | Rattus norvegicus piccolo (presynaptic cytomatrix protein) (Pclo), transcript variant 2, mRNA [NM_001110797]         | <b>43,519</b> |
| Tcf19     | Rattus norvegicus transcription factor 19 (Tcf19), mRNA [NM_213561]                                                  | <b>43,517</b> |
| Pcsk4     | Rattus norvegicus proprotein convertase subtilisin/kexin type 4 (Pcsk4), mRNA [NM_133559]                            | <b>43,404</b> |
| 37865     | Rattus norvegicus septin 3 (Sept3), mRNA [NM_019375]                                                                 | <b>43,380</b> |
| Ube2d4    | Rattus norvegicus ubiquitin-conjugating enzyme E2D 4 (Ube2d4), mRNA [NM_031001]                                      | <b>43,368</b> |
| Csdc2     | Rattus norvegicus cold shock domain containing C2, RNA binding (Csdc2), mRNA [NM_001170542]                          | <b>43,357</b> |
| Xylb      | Rattus norvegicus xylulokinase homolog (H. influenzae) (Xylb), mRNA [NM_001033704]                                   | <b>43,334</b> |
| Capzb     | Rattus norvegicus capping protein (actin filament) muscle Z-line, beta (Capzb), mRNA [NM_001005903]                  | <b>43,325</b> |
| 0         | Unknown                                                                                                              | <b>43,312</b> |
| Tanc2     | Rattus norvegicus tetratricopeptide repeat, ankyrin repeat and coiled-coil containing 2 (Tanc2), mRNA [NM_001191653] | <b>43,282</b> |
| Fhl1      | Rattus norvegicus four and a half LIM domains 1 (Fhl1), transcript variant 2, mRNA [NM_145669]                       | <b>43,247</b> |
| Rbm4b     | Rattus norvegicus RNA binding motif protein 4B (Rbm4b), mRNA [NM_001007014]                                          | <b>43,236</b> |
| Helz      | Rattus norvegicus helicase with zinc finger (Helz), mRNA [NM_001105848]                                              | <b>43,179</b> |
| Cyp4f1    | Rattus norvegicus cytochrome P450, family 4, subfamily f, polypeptide 1 (Cyp4f1), mRNA [NM_019623]                   | <b>43,172</b> |
| Dhrs11    | Rattus norvegicus dehydrogenase/reductase (SDR family) member 11 (Dhrs11), mRNA [NM_001014119]                       | <b>43,158</b> |
| Sdc2      | Rattus norvegicus syndecan 2 (Sdc2), mRNA [NM_013082]                                                                | <b>43,154</b> |
| 0         | DRNBZC09 Rat DRG Library Rattus norvegicus cDNA clone DRNBZC09 5', mRNA sequence [BG671896]                          | <b>43,141</b> |
| Olr192    | Rattus norvegicus olfactory receptor 192 (Olr192), mRNA [NM_001000549]                                               | <b>43,124</b> |
| Afap1     | Rattus norvegicus actin filament associated protein 1 (Afap1), mRNA [NM_080900]                                      | <b>43,121</b> |
| Pvrl1     | Nectin-1 [Source:UniProtKB/TrEMBL;Acc:Q9WTY6] [ENSRNOT00000008614]                                                   | <b>43,113</b> |
| Cdk5r2    | Rattus norvegicus cyclin-dependent kinase 5, regulatory subunit 2 (p39) (Cdk5r2), mRNA [NM_001109309]                | <b>43,102</b> |
| Tnfrsf1a  | Rattus norvegicus tumor necrosis factor receptor superfamily, member 1a (Tnfrsf1a), mRNA [NM_013091]                 | <b>43,061</b> |
| Sdk2      | Rattus norvegicus sidekick homolog 2 (chicken) (Sdk2), mRNA [NM_001108303]                                           | <b>43,053</b> |

|            |                                                                                                                                                                                    |               |
|------------|------------------------------------------------------------------------------------------------------------------------------------------------------------------------------------|---------------|
| Solh       | Rattus norvegicus small optic lobes homolog (Drosophila) (Solh), mRNA [NM_001106990]                                                                                               | <b>43,048</b> |
| Thpo       | Rattus norvegicus thrombopoietin (Thpo), mRNA [NM_031133]                                                                                                                          | <b>42,989</b> |
| Tanc2      | Rattus norvegicus tetratricopeptide repeat, ankyrin repeat and coiled-coil containing 2 (Tanc2), mRNA [NM_001191653]                                                               | <b>42,984</b> |
| Jund       | Rattus norvegicus jun D proto-oncogene (Jund), mRNA [NM_138875]                                                                                                                    | <b>42,983</b> |
| Zic4       | Rattus norvegicus Zic family member 4 (Zic4), mRNA [NM_001108176]                                                                                                                  | <b>42,978</b> |
| Kcnj3      | G protein-activated inward rectifier potassium channel 1 [Source:UniProtKB/Swiss-Prot;Acc:P63251] [ENSRNOT00000007335]                                                             | <b>42,955</b> |
| Adamts3    | Rattus norvegicus ADAM metallopeptidase with thrombospondin type 1, motif 3 (Adamts3), mRNA [NM_001107212]                                                                         | <b>42,954</b> |
| Litaf      | Rattus norvegicus lipopolysaccharide-induced TNF factor (Litaf), mRNA [NM_001105735]                                                                                               | <b>42,951</b> |
| RGD1563300 | Uncharacterized protein [Source:UniProtKB/TrEMBL;Acc:D3Z8Q4] [ENSRNOT00000032995]                                                                                                  | <b>42,941</b> |
| 0          | Uncharacterized protein [Source:UniProtKB/TrEMBL;Acc:D3ZF37] [ENSRNOT00000047805]                                                                                                  | <b>42,905</b> |
| 0          | Unknown                                                                                                                                                                            | <b>42,892</b> |
| RGD1312026 | Rattus norvegicus similar to RIKEN cDNA C230081A13 (RGD1312026), mRNA [NM_001108149]                                                                                               | <b>42,883</b> |
| 0          | Unknown                                                                                                                                                                            | <b>42,863</b> |
| Ap1g1      | Rattus norvegicus adaptor-related protein complex 1, gamma 1 subunit (Ap1g1), mRNA [NM_134460]                                                                                     | <b>42,860</b> |
| Epb4.1l2   | PREDICTED: Rattus norvegicus erythrocyte membrane protein band 4.1-like 2 (Epb4.1l2), mRNA [XM_001053351]                                                                          | <b>42,845</b> |
| Gltpd1     | Rattus norvegicus glycolipid transfer protein domain containing 1 (Gltpd1), mRNA [NM_001007703]                                                                                    | <b>42,845</b> |
| 0          | Unknown                                                                                                                                                                            | <b>42,831</b> |
| Nrg3       | PREDICTED: Rattus norvegicus neuregulin 3, transcript variant 2 (Nrg3), mRNA [XM_573873]                                                                                           | <b>42,811</b> |
| Myl12b     | Rattus norvegicus myosin, light chain 12B, regulatory (Myl12b), mRNA [NM_017343]                                                                                                   | <b>42,792</b> |
| 0          | PREDICTED: Rattus norvegicus similar to Tubby-related protein 3 (Tubby-like protein 3) (LOC688749), mRNA [XM_001071995]                                                            | <b>42,767</b> |
| Fam172a    | Rattus norvegicus family with sequence similarity 172, member A (Fam172a), mRNA [NM_001106401]                                                                                     | <b>42,759</b> |
| Wdyhv1     | Rattus norvegicus WDYHV motif containing 1 (Wdyhv1), mRNA [NM_001025024]                                                                                                           | <b>42,735</b> |
| Ankrd49    | Rattus norvegicus ankyrin repeat domain 49 (Ankrd49), mRNA [NM_001126283]                                                                                                          | <b>42,709</b> |
| Pdgfra     | Rattus norvegicus platelet derived growth factor receptor, alpha polypeptide (Pdgfra), mRNA [NM_012802]                                                                            | <b>42,690</b> |
| Slc6a9     | Rattus norvegicus solute carrier family 6 (neurotransmitter transporter, glycine), member 9 (Slc6a9), mRNA [NM_053818]                                                             | <b>42,638</b> |
| Mxd1       | Rattus norvegicus max dimerization protein 1 (Mxd1), mRNA [NM_001100749]                                                                                                           | <b>42,622</b> |
| S1pr1      | Rattus norvegicus sphingosine-1-phosphate receptor 1 (S1pr1), mRNA [NM_017301]                                                                                                     | <b>42,614</b> |
| Cacnb1     | Rattus norvegicus calcium channel, voltage-dependent, beta 1 subunit (Cacnb1), mRNA [NM_017346]                                                                                    | <b>42,613</b> |
| Usp4       | Rattus norvegicus ubiquitin specific peptidase 4 (proto-oncogene) (Usp4), transcript variant 1, mRNA [NM_001135012]                                                                | <b>42,613</b> |
| Slc25a10   | Rattus norvegicus solute carrier family 25 (mitochondrial carrier; dicarboxylate transporter), member 10 (Slc25a10), nuclear gene encoding mitochondrial protein, mRNA [NM_133418] | <b>42,607</b> |
| Gnai2      | Rattus norvegicus guanine nucleotide binding protein (G protein), alpha inhibiting 2 (Gnai2), mRNA [NM_031035]                                                                     | <b>42,602</b> |
| Lsm2       | Rattus norvegicus LSM2 homolog, U6 small nuclear RNA associated (S. cerevisiae) (Lsm2), transcript variant 2, mRNA [NM_001165922]                                                  | <b>42,586</b> |
| Cyp2j3     | Rattus norvegicus cytochrome P450, family 2, subfamily j, polypeptide 3 (Cyp2j3), mRNA [NM_175766]                                                                                 | <b>42,582</b> |

|              |                                                                                                                                                      |               |
|--------------|------------------------------------------------------------------------------------------------------------------------------------------------------|---------------|
| Agpat1       | Rattus norvegicus 1-acylglycerol-3-phosphate O-acyltransferase 1 (lysophosphatidic acid acyltransferase, alpha) (Agpat1), mRNA [NM_212458]           | <b>42,577</b> |
| Gnao1        | Rattus norvegicus guanine nucleotide binding protein (G protein), alpha activating activity polypeptide O (Gnao1), mRNA [NM_017327]                  | <b>42,576</b> |
| 0            | Unknown                                                                                                                                              | <b>42,516</b> |
| Slc15a2      | Rattus norvegicus solute carrier family 15 (H+/peptide transporter), member 2 (Slc15a2), mRNA [NM_031672]                                            | <b>42,512</b> |
| Atp6v1g2     | Rattus norvegicus ATPase, H+ transporting, lysosomal V1 subunit G2 (Atp6v1g2), mRNA [NM_212490]                                                      | <b>42,507</b> |
| 0            | AGENCOURT_109870703 NIH_MGC_418 Rattus norvegicus cDNA clone IMAGE:9022754 5', mRNA sequence [EV768930]                                              | <b>42,484</b> |
| 0            | PREDICTED: Rattus norvegicus similar to 60S ribosomal protein L29 (P23) (LOC690662), mRNA [XM_001075132]                                             | <b>42,455</b> |
| Lss          | Rattus norvegicus lanosterol synthase (2,3-oxidosqualene-lanosterol cyclase) (Lss), mRNA [NM_031049]                                                 | <b>42,428</b> |
| Sst          | Rattus norvegicus somatostatin (Sst), mRNA [NM_012659]                                                                                               | <b>42,422</b> |
| Cdk2ap1      | Rattus norvegicus CDK2-associated protein 1 (Cdk2ap1), mRNA [NM_001113751]                                                                           | <b>42,421</b> |
| Dagla        | Rattus norvegicus diacylglycerol lipase, alpha (Dagla), mRNA [NM_001005886]                                                                          | <b>42,412</b> |
| Cmpk2        | Rattus norvegicus cytidine monophosphate (UMP-CMP) kinase 2, mitochondrial (Cmpk2), nuclear gene encoding mitochondrial protein, mRNA [NM_001108017] | <b>42,409</b> |
| LOC100365983 | abl interactor 2 [Source:RefSeq peptide;Acc:NP_775166] [ENSRNOT00000058340]                                                                          | <b>42,401</b> |
| En1          | PREDICTED: Rattus norvegicus engrailed homeobox 1, transcript variant 2 (En1), mRNA [XM_001056772]                                                   | <b>42,396</b> |
| Znf295       | Rattus norvegicus zinc finger protein 295 (Znf295), mRNA [NM_001107105]                                                                              | <b>42,393</b> |
| Lppr2        | Rattus norvegicus lipid phosphate phosphatase-related protein type 2 (Lppr2), mRNA [NM_001005881]                                                    | <b>42,382</b> |
| Olfml1       | Rattus norvegicus olfactomedin-like 1 (Olfml1), mRNA [NM_001013192]                                                                                  | <b>42,346</b> |
| Mmgt1        | Rattus norvegicus membrane magnesium transporter 1 (Mmgt1), mRNA [NM_001106970]                                                                      | <b>42,334</b> |
| M6pr         | Rattus norvegicus mannose-6-phosphate receptor, cation dependent (M6pr), mRNA [NM_001007700]                                                         | <b>42,323</b> |
| Cdkn1c       | Rattus norvegicus cyclin-dependent kinase inhibitor 1C (Cdkn1c), transcript variant 1, mRNA [NM_001033757]                                           | <b>42,262</b> |
| 0            | LRRGT00107 [Source:UniProtKB/TrEMBL;Acc:Q6TUD7] [ENSRNOT00000035353]                                                                                 | <b>42,243</b> |
| Sgcd         | Rattus norvegicus sarcoglycan, delta (dystrophin-associated glycoprotein) (Sgcd), transcript variant 1, mRNA [NM_001134826]                          | <b>42,233</b> |
| Phyhip       | Rattus norvegicus phytanoyl-CoA 2-hydroxylase interacting protein (Phyhip), mRNA [NM_001017376]                                                      | <b>42,211</b> |
| Ugcg         | Rattus norvegicus UDP-glucose ceramide glucosyltransferase (Ugcg), mRNA [NM_031795]                                                                  | <b>42,142</b> |
| Stk4         | Rattus norvegicus serine/threonine kinase 4 (Stk4), mRNA [NM_001107800]                                                                              | <b>42,136</b> |
| Mef2c        | PREDICTED: Rattus norvegicus myocyte enhancer factor 2C (Mef2c), mRNA [XM_001056692]                                                                 | <b>42,084</b> |
| Tmem86b      | Rattus norvegicus transmembrane protein 86B (Tmem86b), mRNA [NM_001109604]                                                                           | <b>42,079</b> |
| Ppp1r11      | Rattus norvegicus protein phosphatase 1, regulatory (inhibitor) subunit 11 (Ppp1r11), mRNA [NM_212542]                                               | <b>42,010</b> |
| Begain       | Rattus norvegicus brain-enriched guanylate kinase-associated (Begain), transcript variant 2, mRNA [NM_024163]                                        | <b>42,001</b> |
| Prox1        | Rattus norvegicus prospero homeobox 1 (Prox1), mRNA [NM_001107201]                                                                                   | <b>41,988</b> |
| Bhlhe40      | Rattus norvegicus basic helix-loop-helix family, member e40 (Bhlhe40), mRNA [NM_053328]                                                              | <b>41,982</b> |
| Hist1h1t     | Rattus norvegicus histone cluster 1, H1t (Hist1h1t), mRNA [NM_012579]                                                                                | <b>41,954</b> |
| Nicn1        | Rattus norvegicus nicolin 1 (Nicn1), mRNA [NM_001034999]                                                                                             | <b>41,925</b> |

|            |                                                                                                                                                                                             |               |
|------------|---------------------------------------------------------------------------------------------------------------------------------------------------------------------------------------------|---------------|
| FAM120C    | Uncharacterized protein [Source:UniProtKB/TrEMBL;Acc:D3ZNI4] [ENSRNOT00000003565]                                                                                                           | <b>41,906</b> |
| Ckap4      | Rattus norvegicus cytoskeleton-associated protein 4 (Ckap4), mRNA [NM_001108740]                                                                                                            | <b>41,868</b> |
| Olr278     | Rattus norvegicus olfactory receptor 278 (Olr278), mRNA [NM_001000730]                                                                                                                      | <b>41,854</b> |
| RGD1305587 | Rattus norvegicus similar to RIKEN cDNA 2010107G23 (RGD1305587), mRNA [NM_001127452]                                                                                                        | <b>41,838</b> |
| 0          | Unknown                                                                                                                                                                                     | <b>41,820</b> |
| 0          | Rattus norvegicus chromosome 1, 5 clones, strain BN/SsNHsdMCW RNOR03207166, whole genome shotgun sequence [AABR03000122]                                                                    | <b>41,812</b> |
| 0          | Q5DTV9_MOUSE (Q5DTV9) MKIAA1671 protein (Fragment), partial (75%) [TC598280]                                                                                                                | <b>41,799</b> |
| Sema6d     | Rattus norvegicus sema domain, transmembrane domain (TM), and cytoplasmic domain, (semaphorin) 6D (Sema6d), mRNA [NM_001107768]                                                             | <b>41,785</b> |
| Fam73b     | Rattus norvegicus family with sequence similarity 73, member B (Fam73b), mRNA [NM_001106566]                                                                                                | <b>41,782</b> |
| Ankrd56    | Uncharacterized protein [Source:UniProtKB/TrEMBL;Acc:D4A4Q1] [ENSRNOT00000002995]                                                                                                           | <b>41,765</b> |
| Plcx2      | Rattus norvegicus phosphatidylinositol-specific phospholipase C, X domain containing 2 (Plcx2), mRNA [NM_001134481]                                                                         | <b>41,754</b> |
| LOC311352  | Rattus norvegicus similar to Adenosine deaminase CG11994-PA (LOC311352), mRNA [NM_001014047]                                                                                                | <b>41,750</b> |
| Cops7b     | Rattus norvegicus COP9 constitutive photomorphogenic homolog subunit 7B (Arabidopsis) (Cops7b), mRNA [NM_001108807]                                                                         | <b>41,732</b> |
| Ninj1      | Rattus norvegicus ninjurin 1 (Ninj1), mRNA [NM_012867]                                                                                                                                      | <b>41,728</b> |
| Tcp111     | Rattus norvegicus t-complex 11 like 1 (Tcp111), mRNA [NM_001109202]                                                                                                                         | <b>41,694</b> |
| Camk2n1    | Rattus norvegicus calcium/calmodulin-dependent protein kinase II inhibitor 1 (Camk2n1), mRNA [NM_173337]                                                                                    | <b>41,692</b> |
| Sgta       | Rattus norvegicus small glutamine-rich tetratricopeptide repeat (TPR)-containing, alpha (Sgta), mRNA [NM_022703]                                                                            | <b>41,682</b> |
| 0          | PREDICTED: Rattus norvegicus similar to 60S ribosomal protein L29 (P23) (RGD1559865), mRNA [XM_346093]                                                                                      | <b>41,629</b> |
| Grin3a     | Rattus norvegicus glutamate receptor, ionotropic, N-methyl-D-aspartate 3A (Grin3a), transcript variant 1, mRNA [NM_138546]                                                                  | <b>41,601</b> |
| Ctsb       | Rattus norvegicus cathepsin B (Ctsb), mRNA [NM_022597]                                                                                                                                      | <b>41,588</b> |
| Psrc1      | Rattus norvegicus proline/serine-rich coiled-coil 1 (Psrc1), mRNA [NM_001044302]                                                                                                            | <b>41,588</b> |
| Arhgap21   | Rattus norvegicus Rho GTPase activating protein 21 (Arhgap21), mRNA [NM_001191693]                                                                                                          | <b>41,524</b> |
| LOC500956  | Rattus norvegicus hypothetical protein LOC500956 (LOC500956), mRNA [NM_001025054]                                                                                                           | <b>41,511</b> |
| Klf7       | Rattus norvegicus Kruppel-like factor 7 (ubiquitous) (Klf7), mRNA [NM_001108800]                                                                                                            | <b>41,510</b> |
| 0          | Unknown                                                                                                                                                                                     | <b>41,503</b> |
| 0          | Unknown                                                                                                                                                                                     | <b>41,463</b> |
| LOC499330  | Rattus norvegicus similar to Nicotinamide riboside kinase 1 (LOC499330), mRNA [NM_001024292]                                                                                                | <b>41,457</b> |
| Gtlf3b     | Rattus norvegicus gene trap locus F3b (Gtlf3b), mRNA [NM_001170541]                                                                                                                         | <b>41,447</b> |
| LOC691477  | PREDICTED: Rattus norvegicus similar to 60S ribosomal protein L29 (P23) (LOC691477), mRNA [XM_001078461]                                                                                    | <b>41,445</b> |
| 0          | PREDICTED: Rattus norvegicus similar to 60S ribosomal protein L29 (P23) (RGD1566186), mRNA [XM_001070155]                                                                                   | <b>41,403</b> |
| Sema5a     | Rattus norvegicus sema domain, seven thrombospondin repeats (type 1 and type 1-like), transmembrane domain (TM) and short cytoplasmic domain, (semaphorin) 5A (Sema5a), mRNA [NM_001107659] | <b>41,394</b> |
| 0          | UI-R-BJ1-atd-d-01-0-UI.s1 UI-R-BJ1 Rattus norvegicus cDNA clone UI-R-BJ1-atd-d-01-0-UI 3', mRNA sequence [BE098737]                                                                         | <b>41,390</b> |
| 0          | Unknown                                                                                                                                                                                     | <b>41,328</b> |

|            |                                                                                                                                                                |               |
|------------|----------------------------------------------------------------------------------------------------------------------------------------------------------------|---------------|
| Slc35f1    | Rattus norvegicus solute carrier family 35, member F1 (Slc35f1), mRNA [NM_001109338]                                                                           | <b>41,326</b> |
| 0          | Unknown                                                                                                                                                        | <b>41,318</b> |
| 0          | UI-R-BO1-asq-d-09-0-UI.s1 UI-R-BO1 Rattus norvegicus cDNA clone UI-R-BO1-asq-d-09-0-UI 3', mRNA sequence [BE106644]                                            | <b>41,291</b> |
| Prr14      | Uncharacterized protein [Source:UniProtKB/TrEMBL;Acc:D3ZWF4] [ENSRNOT00000055002]                                                                              | <b>41,290</b> |
| Rab7a      | Rattus norvegicus RAB7A, member RAS oncogene family (Rab7a), mRNA [NM_023950]                                                                                  | <b>41,279</b> |
| Cpsf7      | Rattus norvegicus cleavage and polyadenylation specific factor 7 (Cpsf7), mRNA [NM_001014245]                                                                  | <b>41,247</b> |
| 0          | Unknown                                                                                                                                                        | <b>41,230</b> |
| 0          | Unknown                                                                                                                                                        | <b>41,210</b> |
| Bmp1       | Rattus norvegicus bone morphogenetic protein 1 (Bmp1), mRNA [NM_031323]                                                                                        | <b>41,173</b> |
| Dph3       | Rattus norvegicus DPH3, KTI11 homolog (S. cerevisiae) (Dph3), mRNA [NM_001134850]                                                                              | <b>41,164</b> |
| LOC683470  | PREDICTED: Rattus norvegicus similar to growth arrest specific 1 (LOC683470), mRNA [XM_001066058]                                                              | <b>41,158</b> |
| Auts2      | Uncharacterized protein [Source:UniProtKB/TrEMBL;Acc:D3ZZY1] [ENSRNOT00000044800]                                                                              | <b>41,155</b> |
| Coro2b     | Coro2b protein [Source:UniProtKB/TrEMBL;Acc:Q5EB67] [ENSRNOT00000020951]                                                                                       | <b>41,151</b> |
| Zdhhc9     | Rattus norvegicus zinc finger, DHHC-type containing 9 (Zdhhc9), mRNA [NM_001039016]                                                                            | <b>41,150</b> |
| St6galnac3 | Rattus norvegicus ST6 (alpha-N-acetyl-neuraminyl-2,3-beta-galactosyl-1,3)-N-acetylgalactosaminide alpha-2,6-sialyltransferase 3 (St6galnac3), mRNA [NM_019123] | <b>41,144</b> |
| Nrxn2      | Rattus norvegicus neurexin 2 (Nrxn2), mRNA [NM_053846]                                                                                                         | <b>41,068</b> |
| 0          | Rattus norvegicus TL0ADA15YN18 mRNA sequence. [FQ223062]                                                                                                       | <b>41,051</b> |
| Fcrla      | Rattus norvegicus Fc receptor-like A (Fcrla), mRNA [NM_001100682]                                                                                              | <b>41,044</b> |
| Cbln1      | Rattus norvegicus cerebellin 1 precursor (Cbln1), mRNA [NM_001109127]                                                                                          | <b>41,034</b> |
| Lta        | Rattus norvegicus lymphotoxin alpha (TNF superfamily, member 1) (Lta), mRNA [NM_080769]                                                                        | <b>40,982</b> |
| Fam53b     | Rattus norvegicus family with sequence similarity 53, member B (Fam53b), mRNA [NM_001107556]                                                                   | <b>40,975</b> |
| Wdtdc1     | Rattus norvegicus WD and tetratricopeptide repeats 1 (Wdtdc1), mRNA [NM_001107908]                                                                             | <b>40,921</b> |
| RGD1560833 | PREDICTED: Rattus norvegicus similar to myocardin-related transcription factor B (RGD1560833), mRNA [XM_001075589]                                             | <b>40,899</b> |
| Derl3      | Rattus norvegicus Der1-like domain family, member 3 (Derl3), mRNA [NM_001109577]                                                                               | <b>40,882</b> |
| Tanc1      | Rattus norvegicus tetratricopeptide repeat, ankyrin repeat and coiled-coil containing 1 (Tanc1), mRNA [NM_001002854]                                           | <b>40,879</b> |
| Tcf7l2     | Rattus norvegicus transcription factor 7-like 2 (T-cell specific, HMG-box) (Tcf7l2), mRNA [NM_001191052]                                                       | <b>40,877</b> |
| Parva      | Rattus norvegicus parvin, alpha (Parva), mRNA [NM_020656]                                                                                                      | <b>40,874</b> |
| Cplx2      | Rattus norvegicus complexin 2 (Cplx2), mRNA [NM_053878]                                                                                                        | <b>40,853</b> |
| Cbln4      | Rattus norvegicus cerebellin 4 precursor (Cbln4), mRNA [NM_001109210]                                                                                          | <b>40,795</b> |
| 39873      | Rattus norvegicus membrane-associated ring finger (C3HC4) 9 (March9), mRNA [NM_001100601]                                                                      | <b>40,776</b> |
| LOC361414  | PREDICTED: Rattus norvegicus similar to Synaptic vesicle membrane protein VAT-1 homolog (LOC361414), miscRNA [XR_006986]                                       | <b>40,746</b> |
| Ywhab      | Rattus norvegicus tyrosine 3-monooxygenase/tryptophan 5-monooxygenase activation protein, beta polypeptide (Ywhab), mRNA [NM_019377]                           | <b>40,730</b> |
| 0          | Uncharacterized protein [Source:UniProtKB/TrEMBL;Acc:D3ZXW1] [ENSRNOT00000030613]                                                                              | <b>40,728</b> |

|           |                                                                                                                                                   |        |
|-----------|---------------------------------------------------------------------------------------------------------------------------------------------------|--------|
| Kdm2a     | Rattus norvegicus lysine (K)-specific demethylase 2A (Kdm2a), mRNA [NM_001108515]                                                                 | 40,680 |
| Rnf144a   | Rattus norvegicus ring finger protein 144A (Rnf144a), mRNA [NM_001082410]                                                                         | 40,670 |
| 0         | Unknown                                                                                                                                           | 40,639 |
| Rsu1      | Rattus norvegicus Ras suppressor protein 1 (Rsu1), mRNA [NM_001109404]                                                                            | 40,623 |
| Epn1      | Rattus norvegicus Epsin 1 (Epn1), mRNA [NM_057136]                                                                                                | 40,550 |
| Scamp4    | Rattus norvegicus secretory carrier membrane protein 4 (Scamp4), mRNA [NM_031725]                                                                 | 40,540 |
| LOC684112 | PREDICTED: Rattus norvegicus similar to KIAA0999 protein (LOC684112), mRNA [XM_001068984]                                                         | 40,539 |
| Sh3bgrl3  | Rattus norvegicus SH3 domain binding glutamic acid-rich protein-like 3 (Sh3bgrl3), mRNA [NM_001106688]                                            | 40,536 |
| Sars2     | Rattus norvegicus seryl-tRNA synthetase 2, mitochondrial (Sars2), nuclear gene encoding mitochondrial protein, mRNA [NM_001106240]                | 40,528 |
| Pitpnb    | Rattus norvegicus phosphatidylinositol transfer protein, beta (Pitpnb), mRNA [NM_053742]                                                          | 40,524 |
| Mk1       | Rattus norvegicus Mk1 protein (Mk1), mRNA [NM_134399]                                                                                             | 40,496 |
| Fam134c   | Rattus norvegicus family with sequence similarity 134, member C (Fam134c), mRNA [NM_001135804]                                                    | 40,461 |
| Fiz1      | Rattus norvegicus FLT3-interacting zinc finger 1 (Fiz1), mRNA [NM_001106223]                                                                      | 40,384 |
| Atp2b4    | Rattus norvegicus ATPase, Ca <sup>++</sup> transporting, plasma membrane 4 (Atp2b4), mRNA [NM_001005871]                                          | 40,368 |
| 0         | Unknown                                                                                                                                           | 40,342 |
| Rtn3      | Rattus norvegicus reticulon 3 (Rtn3), transcript variant 1, mRNA [NM_080909]                                                                      | 40,340 |
| Upk1b     | Rattus norvegicus uroplakin 1B (Upk1b), mRNA [NM_001024253]                                                                                       | 40,328 |
| LOC688430 | PREDICTED: Rattus norvegicus similar to Cofilin-1 (Cofilin, non-muscle isoform), transcript variant 1 (LOC688430), mRNA [XM_001067293]            | 40,316 |
| 0         | Unknown                                                                                                                                           | 40,313 |
| 0         | Unknown                                                                                                                                           | 40,308 |
| Nutf2     | Rattus norvegicus nuclear transport factor 2 (Nutf2), mRNA [NM_001007629]                                                                         | 40,300 |
| Gstm1     | Rattus norvegicus glutathione S-transferase mu 1 (Gstm1), mRNA [NM_017014]                                                                        | 40,290 |
| 0         | AW917568 EST348872 Rat gene index, normalized rat, norvegicus, Bento Soares Rattus norvegicus cDNA clone RGIEF42 5' end, mRNA sequence [AW917568] | 40,253 |
| Ank2      | Uncharacterized protein [Source:UniProtKB/TrEMBL;Acc:D4A4Q9] [ENSRNOT00000055615]                                                                 | 40,223 |
| Taf6      | Rattus norvegicus TAF6 RNA polymerase II, TATA box binding protein (TBP)-associated factor (Taf6), mRNA [NM_001044225]                            | 40,204 |
| 0         | Unknown                                                                                                                                           | 40,202 |
| Rbm22     | Rattus norvegicus RNA binding motif protein 22 (Rbm22), mRNA [NM_001025676]                                                                       | 40,201 |
| Mapkbp1   | Rattus norvegicus mitogen activated protein kinase binding protein 1 (Mapkbp1), mRNA [NM_001108589]                                               | 40,200 |
| Tgfb1i1   | Rattus norvegicus transforming growth factor beta 1 induced transcript 1 (Tgfb1i1), mRNA [NM_001191840]                                           | 40,198 |
| Cd300a    | Rattus norvegicus CD300A molecule (Cd300a), mRNA [NM_001205348]                                                                                   | 40,173 |
| Mbd6      | Rattus norvegicus methyl-CpG binding domain protein 6 (Mbd6), mRNA [NM_001170566]                                                                 | 40,099 |
| Akt1s1    | Rattus norvegicus AKT1 substrate 1 (proline-rich) (Akt1s1), mRNA [NM_001106259]                                                                   | 40,090 |
| Sncb      | Rattus norvegicus synuclein, beta (Sncb), mRNA [NM_080777]                                                                                        | 40,078 |

|         |                                                                                                                                  |        |
|---------|----------------------------------------------------------------------------------------------------------------------------------|--------|
| Lhx2    | Rattus norvegicus LIM homeobox 2 (Lhx2), mRNA [NM_001106571]                                                                     | 40,063 |
| liig9   | Rattus norvegicus IIG9 protein (liig9), mRNA [NM_145786]                                                                         | 40,050 |
| Mrpl43  | Rattus norvegicus mitochondrial ribosomal protein L43 (Mrpl43), nuclear gene encoding mitochondrial protein, mRNA [NM_001107598] | 40,040 |
| Abcc4   | Rattus norvegicus ATP-binding cassette, subfamily C (CFTR/MRP), member 4 (Abcc4), mRNA [NM_133411]                               | 39,986 |
| Rabl2b  | Rattus norvegicus RAB, member of RAS oncogene family-like 2B (Rabl2b), mRNA [NM_001013221]                                       | 39,984 |
| 40057   | Rattus norvegicus septin 9 (Sept9), transcript variant 2, mRNA [NM_176856]                                                       | 39,963 |
| Slc6a8  | Rattus norvegicus solute carrier family 6 (neurotransmitter transporter, creatine), member 8 (Slc6a8), mRNA [NM_017348]          | 39,960 |
| Zfhx2   | Rattus norvegicus zinc finger homeobox 2 (Zfhx2), mRNA [NM_001098803]                                                            | 39,913 |
| 0       | Unknown                                                                                                                          | 39,881 |
| 0       | Unknown                                                                                                                          | 39,876 |
| Wdfy3   | Rattus norvegicus WD repeat and FYVE domain containing 3 (Wdfy3), mRNA [NM_001170551]                                            | 39,867 |
| Sf1     | Rattus norvegicus splicing factor 1 (Sf1), transcript variant 1, mRNA [NM_001110793]                                             | 39,848 |
| Wdr7    | Rattus norvegicus WD repeat domain 7 (Wdr7), mRNA [NM_023975]                                                                    | 39,845 |
| Pcyt1b  | Rattus norvegicus phosphate cytidyltransferase 1, choline, beta (Pcyt1b), mRNA [NM_173151]                                       | 39,825 |
| C2cd3   | Rattus norvegicus C2 calcium-dependent domain containing 3 (C2cd3), mRNA [NM_001191602]                                          | 39,818 |
| Man1a2  | Rattus norvegicus mannosidase, alpha, class 1A, member 2 (Man1a2), mRNA [NM_001106452]                                           | 39,811 |
| Znf609  | Rattus norvegicus zinc finger protein 609 (Znf609), mRNA [NM_001173371]                                                          | 39,803 |
| Gdf11   | Growth/differentiation factor 11 [Source:UniProtKB/Swiss-Prot;Acc:Q9Z217] [ENSRNOT00000010035]                                   | 39,787 |
| Trak1   | Rattus norvegicus trafficking protein, kinesin binding 1 (Trak1), mRNA [NM_001134565]                                            | 39,786 |
| Atp5sl  | Rattus norvegicus ATP5S-like (Atp5sl), mRNA [NM_001009705]                                                                       | 39,780 |
| 0       | Q9UJ66_HUMAN (Q9UJ66) 7h3 protein (Fragment), partial (4%) [TC581403]                                                            | 39,771 |
| 0       | Rattus norvegicus TL0AEA68YE13 mRNA sequence. [FQ231763]                                                                         | 39,768 |
| Epn2    | Rattus norvegicus epsin 2 (Epn2), transcript variant 2, mRNA [NM_001033914]                                                      | 39,759 |
| 0       | Uncharacterized protein [Source:UniProtKB/TrEMBL;Acc:D4A0X2] [ENSRNOT00000026785]                                                | 39,757 |
| Cd276   | Rattus norvegicus Cd276 molecule (Cd276), mRNA [NM_182824]                                                                       | 39,747 |
| Atp1b2  | Rattus norvegicus ATPase, Na <sup>+</sup> /K <sup>+</sup> transporting, beta 2 polypeptide (Atp1b2), mRNA [NM_012507]            | 39,745 |
| Rfx7    | Rattus norvegicus regulatory factor X, 7 (Rfx7), mRNA [NM_001127490]                                                             | 39,737 |
| Sfrp5   | Rattus norvegicus secreted frizzled-related protein 5 (Sfrp5), mRNA [NM_001107591]                                               | 39,730 |
| 0       | Unknown                                                                                                                          | 39,729 |
| 0       | Unknown                                                                                                                          | 39,702 |
| 0       | Unknown                                                                                                                          | 39,660 |
| Dyrk1b  | Rattus norvegicus dual-specificity tyrosine-(Y)-phosphorylation regulated kinase 1b (Dyrk1b), mRNA [NM_001107496]                | 39,654 |
| Tmem189 | Rattus norvegicus transmembrane protein 189 (Tmem189), mRNA [NM_001113752]                                                       | 39,652 |
| Cdk2ap2 | Rattus norvegicus CDK2-associated protein 2 (Cdk2ap2), mRNA [NM_001109498]                                                       | 39,638 |



|            |                                                                                                                                              |               |
|------------|----------------------------------------------------------------------------------------------------------------------------------------------|---------------|
| Tnrc4      | Rattus norvegicus trinucleotide repeat containing 4 (Tnrc4), mRNA [NM_001109190]                                                             | <b>39,568</b> |
| Pcbp2      | Rattus norvegicus poly(rC) binding protein 2 (Pcbp2), mRNA [NM_001013223]                                                                    | <b>39,556</b> |
| Nrsn2      | Rattus norvegicus neurensin 2 (Nrsn2), mRNA [NM_001109561]                                                                                   | <b>39,535</b> |
| Gpt2       | Rattus norvegicus Cc2-5 mRNA, complete cds. [AY325245]                                                                                       | <b>39,531</b> |
| 0          | Syntaxin-binding protein 1 [Source:UniProtKB/Swiss-Prot;Acc:P61765] [ENSRNOT00000021189]                                                     | <b>39,530</b> |
| Fgfr2      | Rattus norvegicus fibroblast growth factor receptor 2 (Fgfr2), transcript variant a, mRNA [NM_012712]                                        | <b>39,509</b> |
| Vamp3      | Rattus norvegicus vesicle-associated membrane protein 3 (Vamp3), mRNA [NM_057097]                                                            | <b>39,492</b> |
| Atxn3      | Rattus norvegicus ataxin 3 (Atxn3), mRNA [NM_021702]                                                                                         | <b>39,462</b> |
| Hcn1       | Rattus norvegicus hyperpolarization-activated cyclic nucleotide-gated potassium channel 1 (Hcn1), mRNA [NM_053375]                           | <b>39,461</b> |
| Stc1       | Rattus norvegicus stanniocalcin 1 (Stc1), mRNA [NM_031123]                                                                                   | <b>39,456</b> |
| Pak4       | Rattus norvegicus p21 protein (Cdc42/Rac)-activated kinase 4 (Pak4), mRNA [NM_001106238]                                                     | <b>39,453</b> |
| 0          | HEG homolog 1 (zebrafish) Gene [Source:MGI Symbol;Acc:MGI:1924696] [ENSRNOT00000002443]                                                      | <b>39,435</b> |
| Slc39a13   | Rattus norvegicus solute carrier family 39 (zinc transporter), member 13 (Slc39a13), mRNA [NM_001039196]                                     | <b>39,432</b> |
| Epb41l3    | Rattus norvegicus erythrocyte membrane protein band 4.1-like 3 (Epb41l3), mRNA [NM_053927]                                                   | <b>39,425</b> |
| RGD1563579 | Uncharacterized protein [Source:UniProtKB/TrEMBL;Acc:D4A888] [ENSRNOT00000057412]                                                            | <b>39,356</b> |
| Il13ra1    | Rattus norvegicus interleukin 13 receptor, alpha 1 (Il13ra1), mRNA [NM_145789]                                                               | <b>39,354</b> |
| Yipf6      | Rattus norvegicus Yip1 domain family, member 6 (Yipf6), mRNA [NM_001025747]                                                                  | <b>39,336</b> |
| Zbtb7c     | Rattus norvegicus zinc finger and BTB domain containing 7C (Zbtb7c), mRNA [NM_001127375]                                                     | <b>39,295</b> |
| Scn5a      | Rattus norvegicus sodium channel, voltage-gated, type V, alpha subunit (Scn5a), transcript variant 1, mRNA [NM_013125]                       | <b>39,287</b> |
| Tspan5     | Rattus norvegicus tetraspanin 5 (Tspan5), mRNA [NM_001004090]                                                                                | <b>39,271</b> |
| Ndst1      | Rattus norvegicus N-deacetylase/N-sulfotransferase (heparan glucosaminy) 1 (Ndst1), mRNA [NM_024361]                                         | <b>39,266</b> |
| Kcnd3      | Rattus norvegicus potassium voltage-gated channel, Shal-related subfamily, member 3 (Kcnd3), mRNA [NM_031739]                                | <b>39,236</b> |
| Hmga1      | Rattus norvegicus high mobility group AT-hook 1 (Hmga1), mRNA [NM_139327]                                                                    | <b>39,217</b> |
| LOC691918  | PREDICTED: Rattus norvegicus similar to Centrosomal protein of 27 kDa (Cep27 protein), transcript variant 2 (LOC691918), mRNA [XM_002726165] | <b>39,211</b> |
| Tcfcp2     | Rattus norvegicus transcription factor CP2 (Tcfcp2), mRNA [NM_001134714]                                                                     | <b>39,204</b> |
| Hey2       | Rattus norvegicus hairy/enhancer-of-split related with YRPW motif 2 (Hey2), mRNA [NM_130417]                                                 | <b>39,182</b> |
| 0          | PREDICTED: Rattus norvegicus thymic stromal lymphopoietin (Tslp), mRNA [XM_001067649]                                                        | <b>39,150</b> |
| Eif4e3     | Rattus norvegicus eukaryotic translation initiation factor 4E family member 3 (Eif4e3), mRNA [NM_001106612]                                  | <b>39,134</b> |
| Pkmyt1     | Rattus norvegicus protein kinase, membrane associated tyrosine/threonine 1 (Pkmyt1), mRNA [NM_001105766]                                     | <b>39,132</b> |
| 0          | Uncharacterized protein [Source:UniProtKB/TrEMBL;Acc:D3Z808] [ENSRNOT00000020428]                                                            | <b>39,131</b> |
| Dand5      | Uncharacterized protein [Source:UniProtKB/TrEMBL;Acc:D3ZGN3] [ENSRNOT00000044133]                                                            | <b>39,127</b> |
| 0          | PREDICTED: Rattus norvegicus similar to 60S ribosomal protein L29 (P23) (RGD1562139), mRNA [XM_235395]                                       | <b>39,117</b> |
| Pdcd6ip    | Rattus norvegicus programmed cell death 6 interacting protein (Pdcd6ip), mRNA [NM_001029910]                                                 | <b>39,096</b> |

|            |                                                                                                                                        |               |
|------------|----------------------------------------------------------------------------------------------------------------------------------------|---------------|
| Dzip1      | Dzip1 protein [Source:UniProtKB/TrEMBL;Acc:Q5EB75] [ENSRNOT00000038596]                                                                | <b>39,005</b> |
| Ubap2      | Rattus norvegicus ubiquitin-associated protein 2 (Ubap2), mRNA [NM_001107928]                                                          | <b>39,004</b> |
| Zkscan1    | Rattus norvegicus zinc finger with KRAB and SCAN domains 1 (Zkscan1), mRNA [NM_001025760]                                              | <b>38,997</b> |
| Mobkl2b    | Rattus norvegicus MOB1, Mps One Binder kinase activator-like 2B (yeast) (Mobkl2b), mRNA [NM_001108970]                                 | <b>38,990</b> |
| Otop1      | Rattus norvegicus otopetrin 1 (Otop1), mRNA [NM_181433]                                                                                | <b>38,967</b> |
| Fads1      | Rattus norvegicus fatty acid desaturase 1 (Fads1), mRNA [NM_053445]                                                                    | <b>38,954</b> |
| Prkx       | Rattus norvegicus protein kinase, X-linked (Prkx), mRNA [NM_001033963]                                                                 | <b>38,949</b> |
| Bhlhb9     | Rattus norvegicus basic helix-loop-helix domain containing, class B, 9 (Bhlhb9), mRNA [NM_207611]                                      | <b>38,938</b> |
| Dlgap4     | Rattus norvegicus discs, large homolog-associated protein 4 (Drosophila) (Dlgap4), mRNA [NM_173145]                                    | <b>38,929</b> |
| Irs4       | PREDICTED: Rattus norvegicus insulin receptor substrate 4 (Irs4), mRNA [XM_001056753]                                                  | <b>38,918</b> |
| Abcd1      | Rattus norvegicus ATP-binding cassette, subfamily D (ALD), member 1 (Abcd1), mRNA [NM_001108821]                                       | <b>38,909</b> |
| Adamts2    | Rattus norvegicus ADAM metallopeptidase with thrombospondin type 1 motif, 2 (Adamts2), mRNA [NM_001137622]                             | <b>38,895</b> |
| Dlgap1     | Rattus norvegicus discs, large (Drosophila) homolog-associated protein 1 (Dlgap1), mRNA [NM_022946]                                    | <b>38,861</b> |
| Olr1530    | Rattus norvegicus olfactory receptor 1530 (Olr1530), mRNA [NM_001001101]                                                               | <b>38,860</b> |
| Npy        | Rattus norvegicus neuropeptide Y (Npy), mRNA [NM_012614]                                                                               | <b>38,847</b> |
| Sulf2      | Rattus norvegicus sulfatase 2 (Sulf2), mRNA [NM_001034927]                                                                             | <b>38,846</b> |
| Map3k3     | Rattus norvegicus mitogen activated protein kinase kinase kinase 3 (Map3k3), mRNA [NM_001107058]                                       | <b>38,842</b> |
| Gabbr2     | Rattus norvegicus gamma-aminobutyric acid (GABA) B receptor 2 (Gabbr2), mRNA [NM_031802]                                               | <b>38,833</b> |
| Gdi1       | Rattus norvegicus GDP dissociation inhibitor 1 (Gdi1), mRNA [NM_017088]                                                                | <b>38,806</b> |
| 0          | Unknown                                                                                                                                | <b>38,805</b> |
| Phf12      | Rattus norvegicus PHD finger protein 12 (Phf12), mRNA [NM_001013117]                                                                   | <b>38,774</b> |
| Tmem80     | Rattus norvegicus transmembrane protein 80 (Tmem80), mRNA [NM_001017455]                                                               | <b>38,741</b> |
| Fam53c     | Uncharacterized protein [Source:UniProtKB/TrEMBL;Acc:D3ZH55] [ENSRNOT00000027499]                                                      | <b>38,723</b> |
| 0          | Uncharacterized protein [Source:UniProtKB/TrEMBL;Acc:D3ZEI4] [ENSRNOT00000012248]                                                      | <b>38,711</b> |
| Zbtb39     | Rattus norvegicus zinc finger and BTB domain containing 39 (Zbtb39), mRNA [NM_001130537]                                               | <b>38,710</b> |
| Osbp       | Rattus norvegicus oxysterol binding protein (Osbp), mRNA [NM_001108927]                                                                | <b>38,706</b> |
| Wdr62      | Rattus norvegicus WD repeat domain 62 (Wdr62), mRNA [NM_001191623]                                                                     | <b>38,657</b> |
| Ccdc90a    | Putative uncharacterized protein RGD1307673_predictedUncharacterized protein [Source:UniProtKB/TrEMBL;Acc:D3ZEJ2] [ENSRNOT00000024206] | <b>38,618</b> |
| Zfhx3      | PREDICTED: Rattus norvegicus zinc finger homeobox 3, transcript variant 2 (Zfhx3), mRNA [XM_226464]                                    | <b>38,590</b> |
| Zcchc14    | Uncharacterized protein [Source:UniProtKB/TrEMBL;Acc:D3ZB77] [ENSRNOT00000058486]                                                      | <b>38,566</b> |
| RGD1305680 | Rattus norvegicus similar to KIAA0240 (RGD1305680), mRNA [NM_001106888]                                                                | <b>38,565</b> |
| Plp1       | Rattus norvegicus proteolipid protein 1 (Plp1), mRNA [NM_030990]                                                                       | <b>38,548</b> |

|          |                                                                                                                                                   |               |
|----------|---------------------------------------------------------------------------------------------------------------------------------------------------|---------------|
| Srd5a1   | Rattus norvegicus steroid-5-alpha-reductase, alpha polypeptide 1 (3-oxo-5 alpha-steroid delta 4-dehydrogenase alpha 1) (Srd5a1), mRNA [NM_017070] | <b>38,548</b> |
| Cdk2ap2  | Rattus norvegicus CDK2-associated protein 2 (Cdk2ap2), mRNA [NM_001109498]                                                                        | <b>38,538</b> |
| 0        | Rattus norvegicus TL0AEA61YM21 mRNA sequence. [FQ233449]                                                                                          | <b>38,536</b> |
| Cldn19   | Rattus norvegicus claudin 19 (Cldn19), mRNA [NM_001008514]                                                                                        | <b>38,526</b> |
| 0        | Transforming growth factor beta-2 [Source:UniProtKB/Swiss-Prot;Acc:Q07257] [ENSRNOT00000057338]                                                   | <b>38,522</b> |
| 0        | Q52LS7_HUMAN (Q52LS7) SCRT1 protein, partial (45%) [TC630587]                                                                                     | <b>38,488</b> |
| Jak3     | Rattus norvegicus Janus kinase 3 (Jak3), mRNA [NM_012855]                                                                                         | <b>38,463</b> |
| Olr402   | Rattus norvegicus olfactory receptor 402 (Olr402), mRNA [NM_001001014]                                                                            | <b>38,436</b> |
| 0        | Unknown                                                                                                                                           | <b>38,435</b> |
| Prdm2    | Rattus norvegicus PR domain containing 2, with ZNF domain (Prdm2), mRNA [NM_001077648]                                                            | <b>38,431</b> |
| Clic4    | Rattus norvegicus chloride intracellular channel 4 (Clic4), nuclear gene encoding mitochondrial protein, mRNA [NM_031818]                         | <b>38,424</b> |
| Prelp    | Rattus norvegicus proline/arginine-rich end leucine-rich repeat protein (Prelp), mRNA [NM_053385]                                                 | <b>38,397</b> |
| Eif1ad   | Rattus norvegicus eukaryotic translation initiation factor 1A domain containing (Eif1ad), mRNA [NM_001008305]                                     | <b>38,383</b> |
| Mmp2     | Rattus norvegicus matrix metalloproteinase 2 (Mmp2), mRNA [NM_031054]                                                                             | <b>38,365</b> |
| 0        | Unknown                                                                                                                                           | <b>38,362</b> |
| Cyfp2    | Rattus norvegicus cytoplasmic FMR1 interacting protein 2 (Cyfp2), mRNA [NM_001106996]                                                             | <b>38,337</b> |
| Tmx4     | Rattus norvegicus thioredoxin-related transmembrane protein 4 (Tmx4), mRNA [NM_001100529]                                                         | <b>38,323</b> |
| Zmiz1    | Rattus norvegicus zinc finger, MIZ-type containing 1 (Zmiz1), mRNA [NM_001108393]                                                                 | <b>38,317</b> |
| Atp1a2   | Rattus norvegicus ATPase, Na <sup>+</sup> /K <sup>+</sup> transporting, alpha 2 polypeptide (Atp1a2), mRNA [NM_012505]                            | <b>38,317</b> |
| 0        | PREDICTED: Rattus norvegicus similar to 60S ribosomal protein L29 (P23) (RGD1560076), mRNA [XM_001073916]                                         | <b>38,285</b> |
| Cln5     | Rattus norvegicus ceroid-lipofuscinosis, neuronal 5 (Cln5), mRNA [NM_001191689]                                                                   | <b>38,281</b> |
| Meis2    | Rattus norvegicus Meis homeobox 2 (Meis2), mRNA [NM_001107758]                                                                                    | <b>38,266</b> |
| Pbx1     | Rattus norvegicus pre-B-cell leukemia homeobox 1 (Pbx1), transcript variant 2, mRNA [NM_001100681]                                                | <b>38,235</b> |
| Shroom2  | Rattus norvegicus shroom family member 2 (Shroom2), mRNA [NM_001047893]                                                                           | <b>38,201</b> |
| 0        | WW domain containing adaptor with coiled-coil Gene [Source:MGI Symbol;Acc:MGI:2387357] [ENSRNOT00000058850]                                       | <b>38,189</b> |
| Sfrs15   | Rattus norvegicus splicing factor, arginine/serine-rich 15 (Sfrs15), mRNA [NM_001037347]                                                          | <b>38,181</b> |
| Gpr152   | PREDICTED: Rattus norvegicus G protein-coupled receptor 152 (Gpr152), mRNA [XM_002725764]                                                         | <b>38,119</b> |
| Gja1     | Rattus norvegicus gap junction protein, alpha 1 (Gja1), mRNA [NM_012567]                                                                          | <b>38,092</b> |
| 0        | Unknown                                                                                                                                           | <b>38,056</b> |
| E2f3     | Rattus norvegicus E2F transcription factor 3 (E2f3), mRNA [NM_001137626]                                                                          | <b>38,027</b> |
| Pdgn     | Rattus norvegicus podoplanin (Pdgn), mRNA [NM_019358]                                                                                             | <b>38,024</b> |
| Atp6ap1  | Rattus norvegicus ATPase, H <sup>+</sup> transporting, lysosomal accessory protein 1 (Atp6ap1), mRNA [NM_031785]                                  | <b>38,017</b> |
| Tmem179b | Rattus norvegicus transmembrane protein 179B (Tmem179b), mRNA [NM_001109572]                                                                      | <b>38,004</b> |

|              |                                                                                                                                                            |               |
|--------------|------------------------------------------------------------------------------------------------------------------------------------------------------------|---------------|
| Fgf18        | Rattus norvegicus fibroblast growth factor 18 (Fgf18), mRNA [NM_019199]                                                                                    | <b>37,971</b> |
| Cib2         | Rattus norvegicus calcium and integrin binding family member 2 (Cib2), mRNA [NM_001015010]                                                                 | <b>37,964</b> |
| Cntfr        | Rattus norvegicus ciliary neurotrophic factor receptor (Cntfr), mRNA [NM_001003929]                                                                        | <b>37,959</b> |
| 0            | Transcription initiation factor TFIIID subunit 6 [Source:UniProtKB/Swiss-Prot;Acc:Q63801] [ENSRNOT00000001829]                                             | <b>37,945</b> |
| RGD1559613   | Rattus norvegicus RGD1559613 (RGD1559613), mRNA [NM_001109138]                                                                                             | <b>37,939</b> |
| 0            | Unknown                                                                                                                                                    | <b>37,934</b> |
| Neurod1      | Rattus norvegicus neurogenic differentiation 1 (Neurod1), mRNA [NM_019218]                                                                                 | <b>37,911</b> |
| LOC100365551 | PREDICTED: Rattus norvegicus hypothetical protein LOC100365551 (LOC100365551), mRNA [XM_002727224]                                                         | <b>37,902</b> |
| 0            | Protein phosphatase 1 regulatory subunit 11 [Source:UniProtKB/Swiss-Prot;Acc:Q6MFY6] [ENSRNOT00000045664]                                                  | <b>37,899</b> |
| 0            | Unknown                                                                                                                                                    | <b>37,885</b> |
| Scarb1       | Rattus norvegicus scavenger receptor class B, member 1 (Scarb1), mRNA [NM_031541]                                                                          | <b>37,885</b> |
| LOC691221    | PREDICTED: Rattus norvegicus similar to CG1998-PA (LOC691221), mRNA [XM_001077260]                                                                         | <b>37,852</b> |
| Atp2b3       | Rattus norvegicus ATPase, Ca <sup>++</sup> transporting, plasma membrane 3 (Atp2b3), mRNA [NM_133288]                                                      | <b>37,826</b> |
| LOC305806    | Rattus norvegicus similar to glutaredoxin 1 (thioltransferase); glutaredoxin (LOC305806), mRNA [NM_001013993]                                              | <b>37,821</b> |
| Sf3a1        | Rattus norvegicus splicing factor 3a, subunit 1 (Sf3a1), mRNA [NM_001107235]                                                                               | <b>37,801</b> |
| Ddx58        | Rattus norvegicus DEAD (Asp-Glu-Ala-Asp) box polypeptide 58 (Ddx58), mRNA [NM_001106645]                                                                   | <b>37,800</b> |
| Zap70        | Rattus norvegicus zeta-chain (TCR) associated protein kinase (Zap70), mRNA [NM_001012002]                                                                  | <b>37,784</b> |
| Gatm         | Rattus norvegicus glycine amidinotransferase (L-arginine:glycine amidinotransferase) (Gatm), nuclear gene encoding mitochondrial protein, mRNA [NM_031031] | <b>37,757</b> |
| 0            | Unknown                                                                                                                                                    | <b>37,730</b> |
| Fam149a      | PREDICTED: Rattus norvegicus family with sequence similarity 149, member A (Fam149a), mRNA [XM_001061521]                                                  | <b>37,727</b> |
| LOC100362849 | PREDICTED: Rattus norvegicus hypothetical protein LOC100362849 (LOC100362849), partial mRNA [XM_002729412]                                                 | <b>37,716</b> |
| Sh3bp1       | Rattus norvegicus SH3-domain binding protein 1 (Sh3bp1), mRNA [NM_001171981]                                                                               | <b>37,702</b> |
| Otub1        | Rattus norvegicus OTU domain, ubiquitin aldehyde binding 1 (Otub1), mRNA [NM_001106332]                                                                    | <b>37,667</b> |
| 0            | Unknown                                                                                                                                                    | <b>37,662</b> |
| Rfx1         | Rattus norvegicus regulatory factor X, 1 (influences HLA class II expression) (Rfx1), mRNA [NM_001105944]                                                  | <b>37,636</b> |
| 0            | Potassium voltage-gated channel subfamily C member 3 [Source:UniProtKB/Swiss-Prot;Acc:Q01956] [ENSRNOT00000027043]                                         | <b>37,611</b> |
| Col1a2       | Rattus norvegicus collagen, type I, alpha 2 (Col1a2), mRNA [NM_053356]                                                                                     | <b>37,557</b> |
| Usp54        | Rattus norvegicus ubiquitin specific peptidase 54 (Usp54), mRNA [NM_001008863]                                                                             | <b>37,552</b> |
| Lrrtm2       | Rattus norvegicus leucine rich repeat transmembrane neuronal 2 (Lrrtm2), mRNA [NM_001109469]                                                               | <b>37,543</b> |
| Parvb        | Rattus norvegicus parvin, beta (Parvb), mRNA [NM_001134780]                                                                                                | <b>37,540</b> |
| Pofut2       | Rattus norvegicus protein O-fucosyltransferase 2 (Pofut2), mRNA [NM_001107621]                                                                             | <b>37,540</b> |
| Fam168a      | Rattus norvegicus family with sequence similarity 168, member A (Fam168a), mRNA [NM_001108494]                                                             | <b>37,539</b> |
| RGD1565033   | Rattus norvegicus similar to hypothetical protein LOC284018 isoform b (RGD1565033), mRNA [NM_001109050]                                                    | <b>37,486</b> |

|            |                                                                                                                            |               |
|------------|----------------------------------------------------------------------------------------------------------------------------|---------------|
| 0          | NADH-ubiquinone oxidoreductase chain 5 [Source:UniProtKB/Swiss-Prot;Acc:P11661] [ENSRNOT00000048767]                       | <b>37,486</b> |
| Lrrc56     | Rattus norvegicus leucine rich repeat containing 56 (Lrrc56), mRNA [NM_001024902]                                          | <b>37,485</b> |
| 0          | Unknown                                                                                                                    | <b>37,477</b> |
| LOC497952  | PREDICTED: Rattus norvegicus similar to Ubiquitin-associated protein 2-like (LOC497952), miscRNA [XR_005763]               | <b>37,459</b> |
| 0          | Unknown                                                                                                                    | <b>37,450</b> |
| FAM120C    | PREDICTED: Rattus norvegicus family with sequence similarity 120C (FAM120C), mRNA [XM_001068090]                           | <b>37,449</b> |
| 0          | ROBO1_RAT (O55005) Roundabout homolog 1 precursor, complete [TC573812]                                                     | <b>37,440</b> |
| Csf1       | Rattus norvegicus colony stimulating factor 1 (macrophage) (Csf1), mRNA [NM_023981]                                        | <b>37,419</b> |
| RGD1562699 | Rattus norvegicus RGD1562699 (RGD1562699), mRNA [NM_001106141]                                                             | <b>37,414</b> |
| Chchd10    | Rattus norvegicus coiled-coil-helix-coiled-coil-helix domain containing 10 (Chchd10), mRNA [NM_001007008]                  | <b>37,407</b> |
| Hs6st1     | Rattus norvegicus heparan sulfate 6-O-sulfotransferase 1 (Hs6st1), mRNA [NM_001108210]                                     | <b>37,396</b> |
| Diras1     | Rattus norvegicus DIRAS family, GTP-binding RAS-like 1 (Diras1), mRNA [NM_001108987]                                       | <b>37,393</b> |
| Shisa7     | Rattus norvegicus shisa homolog 7 (Xenopus laevis) (Shisa7), mRNA [NM_001145175]                                           | <b>37,379</b> |
| Csk        | Rattus norvegicus c-src tyrosine kinase (Csk), mRNA [NM_001030039]                                                         | <b>37,370</b> |
| 0          | Uncharacterized protein [Source:UniProtKB/TrEMBL;Acc:D3ZV82] [ENSRNOT00000037181]                                          | <b>37,360</b> |
| Slc1a3     | Rattus norvegicus solute carrier family 1 (glial high affinity glutamate transporter), member 3 (Slc1a3), mRNA [NM_019225] | <b>37,355</b> |
| Cul3       | Rattus norvegicus cullin 3 (Cul3), mRNA [NM_001106923]                                                                     | <b>37,333</b> |
| Ankrd34a   | Rattus norvegicus ankyrin repeat domain 34A (Ankrd34a), mRNA [NM_001024980]                                                | <b>37,326</b> |
| Prom1      | Rattus norvegicus prominin 1 (Prom1), transcript variant 1, mRNA [NM_021751]                                               | <b>37,325</b> |
| 0          | Unknown                                                                                                                    | <b>37,318</b> |
| Kif13b     | Rattus norvegicus kinesin family member 13B (Kif13b), mRNA [NM_213626]                                                     | <b>37,315</b> |
| Galm       | Rattus norvegicus galactose mutarotase (aldose 1-epimerase) (Galm), mRNA [NM_001007704]                                    | <b>37,315</b> |
| Gnaq       | Rattus norvegicus guanine nucleotide binding protein (G protein), q polypeptide (Gnaq), mRNA [NM_031036]                   | <b>37,314</b> |
| 0          | ATP synthase protein 8 [Source:UniProtKB/Swiss-Prot;Acc:P11608] [ENSRNOT00000046201]                                       | <b>37,304</b> |
| LOC690079  | Rattus norvegicus hypothetical protein LOC690079 (LOC690079), mRNA [NM_001109566]                                          | <b>37,298</b> |
| 0          | Unknown                                                                                                                    | <b>37,283</b> |
| Trim17     | Rattus norvegicus tripartite motif-containing 17 (Trim17), mRNA [NM_022798]                                                | <b>37,276</b> |
| Vhl        | Rattus norvegicus von Hippel-Lindau tumor suppressor (Vhl), mRNA [NM_052801]                                               | <b>37,253</b> |
| Aplnr      | Rattus norvegicus apelin receptor (Aplnr), mRNA [NM_031349]                                                                | <b>37,240</b> |
| 0          | Rattus norvegicus clone UI-R-FJ0-cpy-l-05-0-UI unknown mRNA. [AY724520]                                                    | <b>37,228</b> |
| Olr727     | Rattus norvegicus olfactory receptor 727 (Olr727), mRNA [NM_001000619]                                                     | <b>37,193</b> |
| Fgf14      | Rattus norvegicus fibroblast growth factor-like factor 4D mRNA, partial cds. [AF348523]                                    | <b>37,181</b> |
| Rab4a      | Rattus norvegicus RAB4A, member RAS oncogene family (Rab4a), mRNA [NM_013019]                                              | <b>37,154</b> |
| Gli2       | Rattus norvegicus GLI family zinc finger 2 (Gli2), mRNA [NM_001107169]                                                     | <b>37,152</b> |

|            |                                                                                                                                              |               |
|------------|----------------------------------------------------------------------------------------------------------------------------------------------|---------------|
| LOC306766  | Rattus norvegicus hypothetical LOC306766 (LOC306766), mRNA [NM_001014007]                                                                    | <b>37,152</b> |
| Plekhg1    | Rattus norvegicus pleckstrin homology domain containing, family G (with RhoGef domain) member 1 (Plekhg1), mRNA [NM_001190999]               | <b>37,152</b> |
| RGD1566149 | Rattus norvegicus similar to CDNA sequence BC017647 (RGD1566149), mRNA [NM_001109038]                                                        | <b>37,149</b> |
| Zc4h2      | Rattus norvegicus zinc finger, C4H2 domain containing (Zc4h2), mRNA [NM_001126374]                                                           | <b>37,144</b> |
| 0          | Uncharacterized protein [Source:UniProtKB/TrEMBL;Acc:D4A7M0] [ENSRNOT00000011178]                                                            | <b>37,143</b> |
| Fgf20      | Rattus norvegicus fibroblast growth factor 20 (Fgf20), mRNA [NM_023961]                                                                      | <b>37,143</b> |
| Kcna3      | Rattus norvegicus potassium voltage-gated channel, shaker-related subfamily, member 3 (Kcna3), mRNA [NM_019270]                              | <b>37,142</b> |
| Nfix       | Rattus norvegicus nuclear factor I/X (CCAAT-binding transcription factor) (Nfix), mRNA [NM_030866]                                           | <b>37,136</b> |
| LOC292199  | Rattus norvegicus hypothetical LOC292199 (LOC292199), mRNA [NM_001144859]                                                                    | <b>37,126</b> |
| 0          | Unknown                                                                                                                                      | <b>37,113</b> |
| Sez6       | Rattus norvegicus seizure related 6 homolog (mouse) (Sez6), mRNA [NM_001105754]                                                              | <b>37,080</b> |
| Ctxn1      | Rattus norvegicus cortexin 1 (Ctxn1), mRNA [NM_001109935]                                                                                    | <b>37,066</b> |
| Plagl1     | Rattus norvegicus pleiomorphic adenoma gene-like 1 (Plagl1), mRNA [NM_012760]                                                                | <b>37,065</b> |
| Cpne4      | Rattus norvegicus copine IV (Cpne4), mRNA [NM_001109003]                                                                                     | <b>37,064</b> |
| 0          | Unknown                                                                                                                                      | <b>37,050</b> |
| Mrpl4      | Rattus norvegicus mitochondrial ribosomal protein L4 (Mrpl4), nuclear gene encoding mitochondrial protein, mRNA [NM_001108754]               | <b>37,047</b> |
| Lrrc3b     | PREDICTED: Rattus norvegicus leucine rich repeat containing 3B (Lrrc3b), mRNA [XM_002725036]                                                 | <b>37,036</b> |
| Mpp2       | Rattus norvegicus membrane protein, palmitoylated 2 (MAGUK p55 subfamily member 2) (Mpp2), mRNA [NM_053513]                                  | <b>37,031</b> |
| RGD1562310 | Rattus norvegicus similar to hypothetical protein FLJ21415 (RGD1562310), mRNA [NM_001109066]                                                 | <b>37,006</b> |
| Stk40      | Rattus norvegicus serine/threonine kinase 40 (Stk40), mRNA [NM_183056]                                                                       | <b>37,003</b> |
| Ppdpf      | Rattus norvegicus pancreatic progenitor cell differentiation and proliferation factor homolog (zebrafish) (Ppdpf), mRNA [NM_001009316]       | <b>36,997</b> |
| Eif5a      | Rattus norvegicus eukaryotic translation initiation factor 5A (Eif5a), mRNA [NM_001033681]                                                   | <b>36,992</b> |
| Rtn3       | Rattus norvegicus reticulon 3 (Rtn3), transcript variant 1, mRNA [NM_080909]                                                                 | <b>36,990</b> |
| Tex15      | Rattus norvegicus testis expressed 15 (Tex15), mRNA [NM_001106087]                                                                           | <b>36,980</b> |
| Sec14l2    | Rattus norvegicus SEC14-like 2 (S. cerevisiae) (Sec14l2), mRNA [NM_053801]                                                                   | <b>36,970</b> |
| Zfhx4      | Rattus norvegicus zinc finger homeobox 4 (Zfhx4), mRNA [NM_001191702]                                                                        | <b>36,967</b> |
| 0          | Rattus norvegicus similar to 60S RIBOSOMAL PROTEIN L29 (P23) (LOC291920), mRNA [XM_226340]                                                   | <b>36,966</b> |
| Pkig       | Rattus norvegicus protein kinase inhibitor, gamma (Pkig), mRNA [NM_153469]                                                                   | <b>36,939</b> |
| Txnl4b     | Rattus norvegicus thioredoxin-like 4B (Txnl4b), mRNA [NM_001013891]                                                                          | <b>36,932</b> |
| Cyb5b      | Rattus norvegicus cytochrome b5 type B (outer mitochondrial membrane) (Cyb5b), nuclear gene encoding mitochondrial protein, mRNA [NM_030586] | <b>36,930</b> |
| 0          | RGD1305664 protein [Source:UniProtKB/TrEMBL;Acc:Q5EB79] [ENSRNOT00000004829]                                                                 | <b>36,910</b> |
| Snai2      | Rattus norvegicus snail homolog 2 (Drosophila) (Snai2), mRNA [NM_013035]                                                                     | <b>36,905</b> |
| 0          | Q96FH0_HUMAN (Q96FH0) MEF2B protein, complete [TC593056]                                                                                     | <b>36,902</b> |

|            |                                                                                                                                                                  |               |
|------------|------------------------------------------------------------------------------------------------------------------------------------------------------------------|---------------|
| Defb52     | Rattus norvegicus defensin beta 52 (Defb52), mRNA [NM_001037524]                                                                                                 | <b>36,902</b> |
| Hyou1      | Rattus norvegicus hypoxia up-regulated 1 (Hyou1), transcript variant 1, mRNA [NM_138867]                                                                         | <b>36,900</b> |
| Dcc        | Rattus norvegicus deleted in colorectal carcinoma (Dcc), mRNA [NM_012841]                                                                                        | <b>36,899</b> |
| Alpl       | Rattus norvegicus alkaline phosphatase, liver/bone/kidney (Alpl), mRNA [NM_013059]                                                                               | <b>36,890</b> |
| Rnf185     | Rattus norvegicus ring finger protein 185 (Rnf185), mRNA [NM_001024271]                                                                                          | <b>36,882</b> |
| Solh       | Rattus norvegicus small optic lobes homolog (Drosophila) (Solh), mRNA [NM_001106990]                                                                             | <b>36,834</b> |
| 0          | KCNA3_RAT (P15384) Potassium voltage-gated channel subfamily A member 3 (Voltage-gated potassium channel subunit Kv1.3) (RGK5) (RCK3) (KV3), complete [TC574813] | <b>36,834</b> |
| Lrpap1     | Alpha-2-macroglobulin receptor-associated protein [Source:UniProtKB/Swiss-Prot;Acc:Q99068] [ENSRNOT00000012665]                                                  | <b>36,822</b> |
| Prickle3   | Rattus norvegicus prickly homolog 3 (Drosophila) (Prickle3), mRNA [NM_001014110]                                                                                 | <b>36,797</b> |
| LOC687609  | PREDICTED: Rattus norvegicus similar to ras homolog gene family, member f (LOC687609), mRNA [XM_001079372]                                                       | <b>36,781</b> |
| Mlit1      | Rattus norvegicus myeloid/lymphoid or mixed-lineage leukemia (trithorax homolog, Drosophila); translocated to, 1 (Mlit1), mRNA [NM_001106876]                    | <b>36,770</b> |
| Rlbp1      | Rattus norvegicus retinaldehyde binding protein 1 (Rlbp1), mRNA [NM_001106274]                                                                                   | <b>36,754</b> |
| Kcnma1     | Rattus norvegicus potassium large conductance calcium-activated channel, subfamily M, alpha member 1 (Kcnma1), mRNA [NM_031828]                                  | <b>36,726</b> |
| RGD1563155 | Rattus norvegicus similar to RIKEN cDNA 1700054O13 (RGD1563155), mRNA [NM_001134598]                                                                             | <b>36,712</b> |
| Trpm3      | Rattus norvegicus transient receptor potential cation channel, subfamily M, member 3 (Trpm3), mRNA [NM_001191562]                                                | <b>36,689</b> |
| 0          | slingshot homolog 1 (Drosophila) Gene [Source:MGI Symbol;Acc:MGI:2686240] [ENSRNOT00000044751]                                                                   | <b>36,682</b> |
| Atg12      | Rattus norvegicus ATG12 autophagy related 12 homolog (S. cerevisiae) (Atg12), mRNA [NM_001038495]                                                                | <b>36,674</b> |
| Slitrk3    | Rattus norvegicus SLIT and NTRK-like family, member 3 (Slitrk3), mRNA [NM_001107683]                                                                             | <b>36,649</b> |
| 0          | Unknown                                                                                                                                                          | <b>36,645</b> |
| Fnbp1      | Rattus norvegicus formin binding protein 1 (Fnbp1), mRNA [NM_138914]                                                                                             | <b>36,643</b> |
| Nme4       | Rattus norvegicus non-metastatic cells 4, protein expressed in (Nme4), nuclear gene encoding mitochondrial protein, mRNA [NM_001109478]                          | <b>36,614</b> |
| Cand2      | Rattus norvegicus cullin-associated and neddylation-dissociated 2 (putative) (Cand2), mRNA [NM_181362]                                                           | <b>36,606</b> |
| Surf4      | Rattus norvegicus surfeit 4 (Surf4), mRNA [NM_001033868]                                                                                                         | <b>36,594</b> |
| Chrna4     | Rattus norvegicus cholinergic receptor, nicotinic, alpha 4 (Chrna4), mRNA [NM_024354]                                                                            | <b>36,576</b> |
| Efna2      | Rattus norvegicus ephrin A2 (Efna2), mRNA [NM_001168670]                                                                                                         | <b>36,576</b> |
| Olr651     | Rattus norvegicus olfactory receptor 651 (Olr651), mRNA [NM_001000341]                                                                                           | <b>36,568</b> |
| Plec       | Rattus norvegicus plectin (Plec), transcript variant 6, mRNA [NM_022401]                                                                                         | <b>36,547</b> |
| 0          | Unknown                                                                                                                                                          | <b>36,539</b> |
| Sec31a     | Rattus norvegicus SEC31 homolog A (S. cerevisiae) (Sec31a), mRNA [NM_033021]                                                                                     | <b>36,516</b> |
| Grin3a     | Rattus norvegicus glutamate receptor, ionotropic, N-methyl-D-aspartate 3A (Grin3a), transcript variant 1, mRNA [NM_138546]                                       | <b>36,509</b> |
| Nkx2-1     | Rattus norvegicus NK2 homeobox 1 (Nkx2-1), mRNA [NM_013093]                                                                                                      | <b>36,477</b> |
| Maml1      | Rattus norvegicus mastermind like 1 (Drosophila) (Maml1), mRNA [NM_001106997]                                                                                    | <b>36,473</b> |

|            |                                                                                                                                                                                                                      |               |
|------------|----------------------------------------------------------------------------------------------------------------------------------------------------------------------------------------------------------------------|---------------|
| Pcbd1      | Rattus norvegicus pterin-4 alpha-carbinolamine dehydratase/dimerization cofactor of hepatocyte nuclear factor 1 alpha (Pcbd1), mRNA [NM_001007601]                                                                   | <b>36,469</b> |
| Fmod       | Rattus norvegicus fibromodulin (Fmod), mRNA [NM_080698]                                                                                                                                                              | <b>36,465</b> |
| LOC499330  | Rattus norvegicus similar to Nicotinamide riboside kinase 1 (LOC499330), mRNA [NM_001024292]                                                                                                                         | <b>36,454</b> |
| 0          | Similar to HLA-B associated transcript-2 isoform aUncharacterized protein [Source:UniProtKB/TrEMBL;Acc:D3ZUK2] [ENSRNOT00000013546]                                                                                  | <b>36,435</b> |
| Hccs       | Rattus norvegicus holocytochrome c synthetase (Hccs), mRNA [NM_001191732]                                                                                                                                            | <b>36,427</b> |
| Capn1      | Rattus norvegicus calpain 1 (Capn1), mRNA [NM_019152]                                                                                                                                                                | <b>36,404</b> |
| Usp9x      | Rattus norvegicus ubiquitin specific peptidase 9, X-linked (Usp9x), transcript variant 1, mRNA [NM_001135893]                                                                                                        | <b>36,401</b> |
| Mettl7a    | Rattus norvegicus methyltransferase like 7A (Mettl7a), mRNA [NM_001037355]                                                                                                                                           | <b>36,400</b> |
| Tead2      | Rattus norvegicus TEA domain family member 2 (Tead2), mRNA [NM_001107512]                                                                                                                                            | <b>36,393</b> |
| 0          | BP474671 Rattus norvegicus pancreatic islet Rattus norvegicus cDNA clone RBC11656 3', mRNA sequence [BP474671]                                                                                                       | <b>36,392</b> |
| Gbf1       | Rattus norvegicus golgi-specific brefeldin A resistant guanine nucleotide exchange factor 1 (Gbf1), mRNA [NM_001191634]                                                                                              | <b>36,388</b> |
| Cdc42ep4   | Rattus norvegicus CDC42 effector protein (Rho GTPase binding) 4 (Cdc42ep4), mRNA [NM_001107063]                                                                                                                      | <b>36,369</b> |
| Nr4a3      | Rattus norvegicus nuclear receptor subfamily 4, group A, member 3 (Nr4a3), transcript variant 2, mRNA [NM_017352]                                                                                                    | <b>36,358</b> |
| Kcne1l     | Rattus norvegicus potassium voltage-gated channel, Isk-related family, member 1-like (Kcne1l), mRNA [NM_001101003]                                                                                                   | <b>36,318</b> |
| Diras2     | Rattus norvegicus DIRAS family, GTP-binding RAS-like 2 (Diras2), mRNA [NM_001169578]                                                                                                                                 | <b>36,270</b> |
| Rprd1b     | Rattus norvegicus regulation of nuclear pre-mRNA domain containing 1B (Rprd1b), mRNA [NM_001098727]                                                                                                                  | <b>36,269</b> |
| Hipk3      | Rattus norvegicus homeodomain interacting protein kinase 3 (Hipk3), mRNA [NM_031787]                                                                                                                                 | <b>36,268</b> |
| RGD1562533 | Rattus norvegicus similar to mKIAA0774 protein (RGD1562533), mRNA [NM_001100989]                                                                                                                                     | <b>36,251</b> |
| LOC686326  | PREDICTED: Rattus norvegicus similar to Interferon-alpha/beta receptor beta chain precursor (IFN-alpha-REC) (Type I interferon receptor) (IFN-R) (Interferon alpha/beta receptor-2) (LOC686326), mRNA [XM_001073550] | <b>36,247</b> |
| Htr5b      | Rattus norvegicus 5-hydroxytryptamine (serotonin) receptor 5B (Htr5b), mRNA [NM_024395]                                                                                                                              | <b>36,244</b> |
| RGD1559644 | Uncharacterized protein [Source:UniProtKB/TrEMBL;Acc:D3ZBJ1] [ENSRNOT00000068281]                                                                                                                                    | <b>36,231</b> |
| 38961      | Rattus norvegicus septin 6 (Sept6), mRNA [NM_001173429]                                                                                                                                                              | <b>36,226</b> |
| Prkar1b    | Rattus norvegicus protein kinase, cAMP dependent regulatory, type I, beta (Prkar1b), mRNA [NM_001033679]                                                                                                             | <b>36,225</b> |
| Npr1       | Rattus norvegicus natriuretic peptide receptor A/guanylate cyclase A (atrionatriuretic peptide receptor A) (Npr1), mRNA [NM_012613]                                                                                  | <b>36,216</b> |
| 0          | Unknown                                                                                                                                                                                                              | <b>36,205</b> |
| Efhd2      | Rattus norvegicus EF-hand domain family, member D2 (Efhd2), mRNA [NM_001031648]                                                                                                                                      | <b>36,198</b> |
| Hmox2      | Rattus norvegicus heme oxygenase (decycling) 2 (Hmox2), mRNA [NM_024387]                                                                                                                                             | <b>36,155</b> |
| Med19      | Rattus norvegicus mediator complex subunit 19 (Med19), mRNA [NM_001107741]                                                                                                                                           | <b>36,142</b> |
| Dpp8       | Rattus norvegicus dipeptidylpeptidase 8 (Dpp8), mRNA [NM_001108159]                                                                                                                                                  | <b>36,141</b> |
| Hip1       | Rattus norvegicus huntingtin interacting protein 1 (Hip1), mRNA [NM_001100475]                                                                                                                                       | <b>36,133</b> |
| RGD1311429 | PREDICTED: Rattus norvegicus similar to KIAA1267 protein (RGD1311429), miscRNA [XR_006336]                                                                                                                           | <b>36,111</b> |
| Ccni       | Rattus norvegicus cyclin I (Ccni), mRNA [NM_001105998]                                                                                                                                                               | <b>36,109</b> |



|         |                                                                                                                                                         |               |
|---------|---------------------------------------------------------------------------------------------------------------------------------------------------------|---------------|
| Stat2   | Rattus norvegicus signal transducer and activator of transcription 2 (Stat2), mRNA [NM_001011905]                                                       | <b>36,082</b> |
| Mink1   | Uncharacterized protein [Source:UniProtKB/TrEMBL;Acc:D3ZMP1] [ENSRNOT00000043732]                                                                       | <b>36,073</b> |
| 0       | Unknown                                                                                                                                                 | <b>36,054</b> |
| Pfn1    | Rattus norvegicus profilin 1 (Pfn1), mRNA [NM_022511]                                                                                                   | <b>36,051</b> |
| Paip2b  | Putative uncharacterized protein RGD1307930_predictedUncharacterized protein [Source:UniProtKB/TrEMBL;Acc:D4AAB9] [ENSRNOT00000019399]                  | <b>36,014</b> |
| Shkbp1  | SH3KBP1-binding protein 1 [Source:UniProtKB/Swiss-Prot;Acc:P0C5J9] [ENSRNOT00000028348]                                                                 | <b>36,013</b> |
| Pan3    | Uncharacterized protein [Source:UniProtKB/TrEMBL;Acc:D3ZTP2] [ENSRNOT00000044134]                                                                       | <b>35,975</b> |
| 0       | Unknown                                                                                                                                                 | <b>35,971</b> |
| Akap12  | Rattus norvegicus A kinase (PRKA) anchor protein 12 (Akap12), transcript variant 1, mRNA [NM_057103]                                                    | <b>35,959</b> |
| Aqp4    | Rattus norvegicus aquaporin 4 (Aqp4), transcript variant 2, mRNA [NM_001142366]                                                                         | <b>35,939</b> |
| Pole3   | Rattus norvegicus polymerase (DNA directed), epsilon 3 (p17 subunit) (Pole3), mRNA [NM_001007652]                                                       | <b>35,939</b> |
| Zic1    | Rattus norvegicus Zic family member 1 (odd-paired homolog, Drosophila) (Zic1), mRNA [NM_022677]                                                         | <b>35,920</b> |
| Lsm10   | Rattus norvegicus LSM10, U7 small nuclear RNA associated (Lsm10), mRNA [NM_001108976]                                                                   | <b>35,899</b> |
| 0       | Unknown                                                                                                                                                 | <b>35,893</b> |
| Ergic1  | PREDICTED: Rattus norvegicus endoplasmic reticulum-golgi intermediate compartment (ERGIC) 1 (Ergic1), mRNA [XM_001066818]                               | <b>35,890</b> |
| Trip12  | Rattus norvegicus thyroid hormone receptor interactor 12 (Trip12), mRNA [NM_001031659]                                                                  | <b>35,874</b> |
| Pnkd    | Rattus norvegicus paroxysmal nonkinesinogenic dyskinesia (Pnkd), nuclear gene encoding mitochondrial protein, transcript variant 2, mRNA [NM_001134751] | <b>35,829</b> |
| Saps1   | Rattus norvegicus SAPS domain family, member 1 (Saps1), mRNA [NM_001135849]                                                                             | <b>35,826</b> |
| Adad2   | PREDICTED: Rattus norvegicus similar to testis nuclear RNA-binding protein (LOC691275), mRNA [XM_002725395]                                             | <b>35,824</b> |
| Nrcam   | Rattus norvegicus neuronal cell adhesion molecule (Nrcam), mRNA [NM_013150]                                                                             | <b>35,809</b> |
| Znf524  | Rattus norvegicus zinc finger protein 524 (Znf524), mRNA [NM_001108905]                                                                                 | <b>35,790</b> |
| Pttg1ip | Rattus norvegicus pituitary tumor-transforming 1 interacting protein (Pttg1ip), mRNA [NM_001013238]                                                     | <b>35,769</b> |
| Hrnbp3  | similar to ataxin 2-binding protein 1 isoform 2 (RGD1560070), mRNA [Source:RefSeq DNA;Acc:NM_001134498] [ENSRNOT00000004524]                            | <b>35,769</b> |
| Ccdc92  | Rattus norvegicus coiled-coil domain containing 92 (Ccdc92), mRNA [NM_001083898]                                                                        | <b>35,757</b> |
| Rhog    | Rattus norvegicus ras homolog gene family, member G (rho G) (Rhog), mRNA [NM_001037195]                                                                 | <b>35,744</b> |
| Mlit11  | Rattus norvegicus myeloid/lymphoid or mixed-lineage leukemia (trithorax homolog, Drosophila); translocated to, 11 (Mlit11), mRNA [NM_001013912]         | <b>35,735</b> |
| Pcdh21  | Rattus norvegicus protocadherin 21 (Pcdh21), mRNA [NM_053572]                                                                                           | <b>35,696</b> |
| Nudt3   | Rattus norvegicus nudix (nucleoside diphosphate linked moiety X)-type motif 3 (Nudt3), mRNA [NM_001024243]                                              | <b>35,663</b> |
| Sgsm2   | Rattus norvegicus small G protein signaling modulator 2 (Sgsm2), mRNA [NM_001107020]                                                                    | <b>35,660</b> |
| Mad111  | Rattus norvegicus MAD1 mitotic arrest deficient-like 1 (yeast) (Mad111), mRNA [NM_001109387]                                                            | <b>35,644</b> |
| Cntn4   | Rattus norvegicus contactin 4 (Cntn4), mRNA [NM_053879]                                                                                                 | <b>35,628</b> |

|              |                                                                                                                                               |               |
|--------------|-----------------------------------------------------------------------------------------------------------------------------------------------|---------------|
| 0            | RVL20318 Wackym-Soares normalized rat vestibular cDNA library Rattus norvegicus cDNA 5', mRNA sequence [DV727767]                             | <b>35,620</b> |
| Dcp1a        | Rattus norvegicus DCP1 decapping enzyme homolog A ( <i>S. cerevisiae</i> ) (Dcp1a), mRNA [NM_001191831]                                       | <b>35,573</b> |
| Tcf7l2       | Rattus norvegicus transcription factor 7-like 2 (T-cell specific, HMG-box) (Tcf7l2), mRNA [NM_001191052]                                      | <b>35,544</b> |
| Bche         | Rattus norvegicus butyrylcholinesterase (Bche), mRNA [NM_022942]                                                                              | <b>35,541</b> |
| Zbtb6        | Rattus norvegicus zinc finger and BTB domain containing 6 (Zbtb6), mRNA [NM_001108953]                                                        | <b>35,540</b> |
| Foxo3        | Rattus norvegicus forkhead box O3 (Foxo3), mRNA [NM_001106395]                                                                                | <b>35,535</b> |
| Mro          | PREDICTED: Rattus norvegicus maestro (Mro), mRNA [XM_001053368]                                                                               | <b>35,500</b> |
| Eil2         | Eil2 protein [Source:UniProtKB/TrEMBL;Acc:Q2NL49] [ENSRNOT00000032974]                                                                        | <b>35,474</b> |
| RGD1566084   | Uncharacterized protein [Source:UniProtKB/TrEMBL;Acc:D3ZPT0] [ENSRNOT00000043197]                                                             | <b>35,471</b> |
| Fgd3         | Rattus norvegicus FYVE, RhoGEF and PH domain containing 3 (Fgd3), mRNA [NM_001108409]                                                         | <b>35,460</b> |
| LOC100365546 | PREDICTED: Rattus norvegicus rCG30673-like (LOC100365546), mRNA [XM_002726646]                                                                | <b>35,448</b> |
| Entpd3       | Rattus norvegicus ectonucleoside triphosphate diphosphohydrolase 3 (Entpd3), mRNA [NM_178106]                                                 | <b>35,446</b> |
| 0            | Q4SB82_TETNG (Q4SB82) Chromosome undetermined SCAF14677, whole genome shotgun sequence, partial (5%) [TC590476]                               | <b>35,436</b> |
| Zfp418       | Rattus norvegicus zinc finger protein 418 (Zfp418), mRNA [NM_001191620]                                                                       | <b>35,433</b> |
| Dhdpsl       | Rattus norvegicus dihydrodipicolinate synthase-like, mitochondrial (Dhdpsl), nuclear gene encoding mitochondrial protein, mRNA [NM_001106355] | <b>35,408</b> |
| Rnf24        | Rattus norvegicus ring finger protein 24 (Rnf24), mRNA [NM_001108591]                                                                         | <b>35,408</b> |
| Acsl1        | Rattus norvegicus acyl-CoA synthetase long-chain family member 1 (Acsl1), mRNA [NM_012820]                                                    | <b>35,392</b> |
| Meis1        | Rattus norvegicus Meis homeobox 1 (Meis1), mRNA [NM_001134702]                                                                                | <b>35,384</b> |
| 0            | Unknown                                                                                                                                       | <b>35,379</b> |
| RGD1564285   | PREDICTED: Rattus norvegicus similar to hypothetical protein 4930509O22 (RGD1564285), mRNA [XM_001079282]                                     | <b>35,378</b> |
| Spert        | Rattus norvegicus spermatid associated (Spert), mRNA [NM_001017506]                                                                           | <b>35,374</b> |
| Gabra1       | Rattus norvegicus gamma-aminobutyric acid (GABA) A receptor, alpha 1 (Gabra1), mRNA [NM_183326]                                               | <b>35,365</b> |
| 0            | Q62262_MOUSE (Q62262) Spermatid perinuclear RNA binding protein, partial (12%) [TC595714]                                                     | <b>35,362</b> |
| Dhcr7        | Rattus norvegicus 7-dehydrocholesterol reductase (Dhcr7), mRNA [NM_022389]                                                                    | <b>35,349</b> |
| Slc39a9      | Rattus norvegicus solute carrier family 39 (zinc transporter), member 9 (Slc39a9), mRNA [NM_001034929]                                        | <b>35,322</b> |
| 0            | Unknown                                                                                                                                       | <b>35,319</b> |
| 0            | Rattus norvegicus similar to 60S RIBOSOMAL PROTEIN L29 (P23) (LOC291290), mRNA [XM_225531]                                                    | <b>35,297</b> |
| Deadc1       | Rattus norvegicus deaminase domain containing 1 (Deadc1), mRNA [NM_001115028]                                                                 | <b>35,276</b> |
| 0            | Unknown                                                                                                                                       | <b>35,268</b> |
| LOC367084    | PREDICTED: Rattus norvegicus similar to 60S ribosomal protein L29 (P23) (LOC367084), mRNA [XM_002729903]                                      | <b>35,250</b> |
| Tmigd1       | Rattus norvegicus transmembrane and immunoglobulin domain containing 1 (Tmigd1), mRNA [NM_001135029]                                          | <b>35,244</b> |
| Kit          | Rattus norvegicus v-kit Hardy-Zuckerman 4 feline sarcoma viral oncogene homolog (Kit), mRNA [NM_022264]                                       | <b>35,217</b> |
| RGD1305090   | Rattus norvegicus similar to CD2-associated protein (RGD1305090), mRNA [NM_001162535]                                                         | <b>35,214</b> |
| RbmX         | Rattus norvegicus RNA binding motif protein, X-linked (RbmX), mRNA [NM_001025663]                                                             | <b>35,210</b> |

|            |                                                                                                                                            |               |
|------------|--------------------------------------------------------------------------------------------------------------------------------------------|---------------|
| Naf1       | Rattus norvegicus nuclear assembly factor 1 homolog (S. cerevisiae) (Naf1), mRNA [NM_001024772]                                            | <b>35,207</b> |
| Elk1       | Rattus norvegicus ELK1, member of ETS oncogene family (Elk1), mRNA [NM_001108059]                                                          | <b>35,186</b> |
| Vps39      | Rattus norvegicus vacuolar protein sorting 39 homolog (S. cerevisiae) (Vps39), mRNA [NM_001012186]                                         | <b>35,184</b> |
| Pacs1      | Rattus norvegicus phosphofurin acidic cluster sorting protein 1 (Pacs1), mRNA [NM_134406]                                                  | <b>35,174</b> |
| 0          | PREDICTED: Rattus norvegicus similar to zinc finger and SCAN domain containing 4 (RGD1561748), mRNA [XM_001078969]                         | <b>35,159</b> |
| Gstt3      | Rattus norvegicus glutathione S-transferase, theta 3 (Gstt3), mRNA [NM_001137643]                                                          | <b>35,157</b> |
| Mutyh      | Rattus norvegicus mutY homolog (E. coli) (Mutyh), nuclear gene encoding mitochondrial protein, mRNA [NM_133316]                            | <b>35,145</b> |
| 0          | Unknown                                                                                                                                    | <b>35,134</b> |
| Creg1      | Rattus norvegicus cellular repressor of E1A-stimulated genes 1 (Creg1), mRNA [NM_001105966]                                                | <b>35,123</b> |
| Sp2        | Rattus norvegicus Sp2 transcription factor (Sp2), mRNA [NM_001107045]                                                                      | <b>35,120</b> |
| Ntrk2      | Rattus norvegicus neurotrophic tyrosine kinase, receptor, type 2 (Ntrk2), transcript variant 1, mRNA [NM_012731]                           | <b>35,105</b> |
| Atp2a2     | Rattus norvegicus ATPase, Ca <sup>++</sup> transporting, cardiac muscle, slow twitch 2 (Atp2a2), transcript variant 3, mRNA [NM_001110823] | <b>35,098</b> |
| Bmyc       | Rattus norvegicus brain expressed myelocytomatosis oncogene (Bmyc), mRNA [NM_001013163]                                                    | <b>35,089</b> |
| RGD1565947 | Rattus norvegicus similar to netrin 4 (RGD1565947), mRNA [NM_001106780]                                                                    | <b>35,084</b> |
| Alg2       | Rattus norvegicus asparagine-linked glycosylation 2, alpha-1,3-mannosyltransferase homolog (S. cerevisiae) (Alg2), mRNA [NM_001100710]     | <b>35,046</b> |
| Olr403     | Rattus norvegicus olfactory receptor 403 (Olr403), mRNA [NM_001000381]                                                                     | <b>35,034</b> |
| Fbrs       | PREDICTED: Rattus norvegicus fibrosin (Fbrs), mRNA [XM_002725689]                                                                          | <b>35,025</b> |
| Plp1       | Rattus norvegicus proteolipid protein 1 (Plp1), mRNA [NM_030990]                                                                           | <b>35,018</b> |
| Pcif1      | Rattus norvegicus PDX1 C-terminal inhibiting factor 1 (Pcif1), mRNA [NM_001108605]                                                         | <b>35,012</b> |
| Nmnat2     | Rattus norvegicus nicotinamide nucleotide adenylyltransferase 2 (Nmnat2), mRNA [NM_001048042]                                              | <b>34,984</b> |
| 0          | Unknown                                                                                                                                    | <b>34,983</b> |
| Ppp2r1a    | Rattus norvegicus protein phosphatase 2 (formerly 2A), regulatory subunit A, alpha isoform (Ppp2r1a), mRNA [NM_057140]                     | <b>34,983</b> |
| RGD1565498 | Rattus norvegicus similar to Hypothetical protein LOC270802 (RGD1565498), mRNA [NM_001109287]                                              | <b>34,977</b> |
| RGD1566264 | Uncharacterized protein [Source:UniProtKB/TrEMBL;Acc:D3ZFF1] [ENSRNOT00000051929]                                                          | <b>34,935</b> |
| Stx17      | Rattus norvegicus syntaxin 17 (Stx17), mRNA [NM_145723]                                                                                    | <b>34,931</b> |
| Axin2      | Rattus norvegicus axin 2 (Axin2), mRNA [NM_024355]                                                                                         | <b>34,917</b> |
| LOC689226  | Rattus norvegicus similar to ubiquitin-conjugating enzyme E2R 2 (LOC689226), mRNA [NM_001127573]                                           | <b>34,901</b> |
| Ccdc97     | Rattus norvegicus coiled-coil domain containing 97 (Ccdc97), mRNA [NM_001106235]                                                           | <b>34,892</b> |
| Htr3a      | Rattus norvegicus 5-hydroxytryptamine (serotonin) receptor 3a (Htr3a), mRNA [NM_024394]                                                    | <b>34,860</b> |
| 0          | Glutamate receptor subunit GluR1 [Source:UniProtKB/TrEMBL;Acc:Q924I5] [ENSRNOT00000003279]                                                 | <b>34,852</b> |
| 0          | Unknown                                                                                                                                    | <b>34,845</b> |
| 0          | Unknown                                                                                                                                    | <b>34,844</b> |
| Dnajc10    | Rattus norvegicus DnaJ (Hsp40) homolog, subfamily C, member 10 (Dnajc10), mRNA [NM_001106486]                                              | <b>34,829</b> |
| Pkig       | Rattus norvegicus protein kinase inhibitor, gamma (Pkig), mRNA [NM_153469]                                                                 | <b>34,819</b> |

|            |                                                                                                                                      |               |
|------------|--------------------------------------------------------------------------------------------------------------------------------------|---------------|
| Nr2f2      | Rattus norvegicus nuclear receptor subfamily 2, group F, member 2 (Nr2f2), mRNA [NM_080778]                                          | <b>34,799</b> |
| Gnao1      | Rattus norvegicus guanine nucleotide binding protein (G protein), alpha activating activity polypeptide O (Gnao1), mRNA [NM_017327]  | <b>34,797</b> |
| Tmed4      | Rattus norvegicus transmembrane emp24 protein transport domain containing 4 (Tmed4), mRNA [NM_001107238]                             | <b>34,756</b> |
| Unc93b1    | Rattus norvegicus unc-93 homolog B1 (C. elegans) (Unc93b1), mRNA [NM_001108513]                                                      | <b>34,755</b> |
| Pou2f1     | Rattus norvegicus POU class 2 homeobox 1 (Pou2f1), mRNA [NM_001100639]                                                               | <b>34,748</b> |
| Aff3       | Rattus norvegicus AF4/FMR2 family, member 3 (Aff3), mRNA [NM_001191887]                                                              | <b>34,746</b> |
| Oprm1      | Rattus norvegicus opioid receptor, mu 1 (Oprm1), transcript variant 1, mRNA [NM_013071]                                              | <b>34,731</b> |
| Prkaa2     | Rattus norvegicus protein kinase, AMP-activated, alpha 2 catalytic subunit (Prkaa2), mRNA [NM_023991]                                | <b>34,712</b> |
| Bcl9       | Rattus norvegicus B-cell CLL/lymphoma 9 (Bcl9), mRNA [NM_001107703]                                                                  | <b>34,699</b> |
| 0          | Uncharacterized protein [Source:UniProtKB/TrEMBL;Acc:D3ZAQ3] [ENSRNOT00000024129]                                                    | <b>34,692</b> |
| 0          | SWI/SNF complex subunit SMARCC1 [Source:RefSeq peptide;Acc:NP_001100331] [ENSRNOT00000056153]                                        | <b>34,687</b> |
| Dbp        | Rattus norvegicus D site of albumin promoter (albumin D-box) binding protein (Dbp), mRNA [NM_012543]                                 | <b>34,681</b> |
| Cmip       | Rattus norvegicus c-Maf-inducing protein (Cmip), mRNA [NM_001163273]                                                                 | <b>34,674</b> |
| Atp2b2     | Rattus norvegicus ATPase, Ca <sup>++</sup> transporting, plasma membrane 2 (Atp2b2), mRNA [NM_012508]                                | <b>34,670</b> |
| Grik3      | Rattus norvegicus glutamate receptor, ionotropic, kainate 3 (Grik3), transcript variant 2, mRNA [NM_181373]                          | <b>34,661</b> |
| Usp6nl     | Rattus norvegicus USP6 N-terminal like (Usp6nl), mRNA [NM_001106120]                                                                 | <b>34,660</b> |
| LOC294154  | similar to chromosome 6 open reading frame 106 isoform a (LOC294154), mRNA [Source:RefSeq DNA;Acc:NM_001039607] [ENSRNOT00000059426] | <b>34,655</b> |
| Lrrc61     | Rattus norvegicus leucine rich repeat containing 61 (Lrrc61), mRNA [NM_001109231]                                                    | <b>34,645</b> |
| Pqcp       | Rattus norvegicus polyglutamine-containing protein (Pqcp), mRNA [NM_001012470]                                                       | <b>34,638</b> |
| Vps26b     | Rattus norvegicus vacuolar protein sorting 26 homolog B (S. pombe) (Vps26b), mRNA [NM_001106809]                                     | <b>34,634</b> |
| 0          | Uncharacterized protein [Source:UniProtKB/TrEMBL;Acc:D3ZS88] [ENSRNOT00000011803]                                                    | <b>34,620</b> |
| Supt4h1    | Rattus norvegicus suppressor of Ty 4 homolog 1 (S. cerevisiae) (Supt4h1), mRNA [NM_001105828]                                        | <b>34,618</b> |
| 0          | Unknown                                                                                                                              | <b>34,605</b> |
| Nkiras2    | Rattus norvegicus NFkB inhibitor interacting Ras-like 2 (Nkiras2), mRNA [NM_001105839]                                               | <b>34,603</b> |
| Mecp2      | Rattus norvegicus methyl CpG binding protein 2 (Mecp2), mRNA [NM_022673]                                                             | <b>34,598</b> |
| Ube2v1     | Rattus norvegicus ubiquitin-conjugating enzyme E2 variant 1 (Ube2v1), mRNA [NM_001110345]                                            | <b>34,558</b> |
| Kcnc2      | Rattus norvegicus potassium voltage gated channel, Shaw-related subfamily, member 2 (Kcnc2), transcript variant b, mRNA [NM_139217]  | <b>34,525</b> |
| Mmgt1      | Rattus norvegicus membrane magnesium transporter 1 (Mmgt1), mRNA [NM_001106970]                                                      | <b>34,502</b> |
| Map1lc3b   | Rattus norvegicus microtubule-associated protein 1 light chain 3 beta (Map1lc3b), mRNA [NM_022867]                                   | <b>34,496</b> |
| RGD1302996 | Rattus norvegicus hypothetical protein MGC:15854 (RGD1302996), mRNA [NM_213610]                                                      | <b>34,466</b> |
| 0          | LOC100125377 proteinRCG58522 [Source:UniProtKB/TrEMBL;Acc:Q5HZD9] [ENSRNOT00000039741]                                               | <b>34,464</b> |
| 0          | predicted pseudogene 8325 Pseudogene [Source:MGI Symbol;Acc:MGI:3644852] [ENSRNOT00000037392]                                        | <b>34,451</b> |
| 0          | Unknown                                                                                                                              | <b>34,450</b> |

|            |                                                                                                                                  |               |
|------------|----------------------------------------------------------------------------------------------------------------------------------|---------------|
| Samd4a     | Rattus norvegicus sterile alpha motif domain containing 4A (Samd4a), mRNA [NM_001107254]                                         | <b>34,445</b> |
| Mmgt2      | Rattus norvegicus membrane magnesium transporter 2 (Mmgt2), mRNA [NM_001013967]                                                  | <b>34,430</b> |
| 0          | Unknown                                                                                                                          | <b>34,424</b> |
| Spock2     | Rattus norvegicus sparc/osteonectin, cwcv and kazal-like domains proteoglycan 2 (Spock2), mRNA [NM_001108533]                    | <b>34,419</b> |
| Rgma       | Rattus norvegicus RGM domain family, member A (Rgma), mRNA [NM_001107524]                                                        | <b>34,404</b> |
| Cx3cl1     | Rattus norvegicus chemokine (C-X3-C motif) ligand 1 (Cx3cl1), mRNA [NM_134455]                                                   | <b>34,404</b> |
| Ncdn       | Rattus norvegicus neurochondrin (Ncdn), mRNA [NM_053543]                                                                         | <b>34,402</b> |
| Pigg       | Uncharacterized protein [Source:UniProtKB/TrEMBL;Acc:D3ZDH0] [ENSRNOT00000033973]                                                | <b>34,400</b> |
| Pax1       | Rattus norvegicus paired box 1 (Pax1), mRNA [NM_001107787]                                                                       | <b>34,376</b> |
| Smtnl2     | Rattus norvegicus smoothelin-like 2 (Smtnl2), mRNA [NM_001190998]                                                                | <b>34,371</b> |
| Pcbp3      | Rattus norvegicus poly(rC) binding protein 3 (Pcbp3), mRNA [NM_001011945]                                                        | <b>34,371</b> |
| Prkce      | Rattus norvegicus protein kinase C, epsilon (Prkce), mRNA [NM_017171]                                                            | <b>34,368</b> |
| Zfp407     | PREDICTED: Rattus norvegicus zinc finger protein 407 (Zfp407), mRNA [XM_225679]                                                  | <b>34,365</b> |
| Bmp7       | Rattus norvegicus bone morphogenetic protein 7 (Bmp7), mRNA [NM_001191856]                                                       | <b>34,359</b> |
| Git1       | Rattus norvegicus G protein-coupled receptor kinase interacting ArfGAP 1 (Git1), mRNA [NM_031814]                                | <b>34,328</b> |
| 0          | NADH-ubiquinone oxidoreductase chain 2 [Source:UniProtKB/Swiss-Prot;Acc:P11662] [ENSRNOT00000040993]                             | <b>34,313</b> |
| Slc22a17   | Rattus norvegicus solute carrier family 22, member 17 (Slc22a17), mRNA [NM_177421]                                               | <b>34,303</b> |
| 0          | Rattus norvegicus similar to 60S RIBOSOMAL PROTEIN L29 (P23) (LOC290219), mRNA [XM_224186]                                       | <b>34,268</b> |
| Fam125b    | Uncharacterized protein [Source:UniProtKB/TrEMBL;Acc:D4A732] [ENSRNOT00000023172]                                                | <b>34,260</b> |
| Mat2a      | Rattus norvegicus methionine adenosyltransferase II, alpha (Mat2a), mRNA [NM_134351]                                             | <b>34,250</b> |
| Sall2      | Rattus norvegicus sal-like 2 (Drosophila) (Sall2), mRNA [NM_001107262]                                                           | <b>34,224</b> |
| Slc35d3    | Rattus norvegicus solute carrier family 35, member D3 (Slc35d3), mRNA [NM_001107522]                                             | <b>34,205</b> |
| 0          | Q53FN7_HUMAN (Q53FN7) BZW1 protein variant (Fragment), complete [TC583097]                                                       | <b>34,161</b> |
| Ctnna2     | Rattus norvegicus catenin (cadherin associated protein), alpha 2 (Ctnna2), mRNA [NM_001106598]                                   | <b>34,148</b> |
| Ccrk       | Rattus norvegicus cell cycle related kinase (Ccrk), mRNA [NM_001025752]                                                          | <b>34,095</b> |
| Mthfs      | Rattus norvegicus 5,10-methenyltetrahydrofolate synthetase (5-formyltetrahydrofolate cyclo-ligase) (Mthfs), mRNA [NM_001009349]  | <b>34,093</b> |
| Exoc6b     | Rattus norvegicus exocyst complex component 6B (Exoc6b), mRNA [NM_001109246]                                                     | <b>34,080</b> |
| RGD1563224 | Rattus norvegicus similar to 4930438D12Rik protein (RGD1563224), mRNA [NM_001100995]                                             | <b>34,069</b> |
| Pde4a      | Rattus norvegicus phosphodiesterase 4A, cAMP-specific (phosphodiesterase E2 dunce homolog, Drosophila) (Pde4a), mRNA [NM_013101] | <b>34,049</b> |
| Btrc       | Rattus norvegicus beta-transducin repeat containing (Btrc), mRNA [NM_001007148]                                                  | <b>34,035</b> |
| 0          | Unknown                                                                                                                          | <b>34,034</b> |
| 0          | Potassium voltage-gated channel subfamily D member 3 [Source:UniProtKB/Swiss-Prot;Acc:Q62897] [ENSRNOT00000051835]               | <b>34,030</b> |
| Olr1128    | Rattus norvegicus olfactory receptor 1128 (Olr1128), mRNA [NM_001000987]                                                         | <b>34,027</b> |
| Sptan1     | Rattus norvegicus spectrin, alpha, non-erythrocytic 1 (Sptan1), mRNA [NM_171983]                                                 | <b>34,006</b> |

|              |                                                                                                                                       |               |
|--------------|---------------------------------------------------------------------------------------------------------------------------------------|---------------|
| Tspan31      | Rattus norvegicus tetraspanin 31 (Tspan31), mRNA [NM_001008378]                                                                       | <b>34,003</b> |
| Numb         | Rattus norvegicus numb homolog (Drosophila) (Numb), mRNA [NM_133287]                                                                  | <b>34,000</b> |
| Frmd8        | Rattus norvegicus FERM domain containing 8 (Frmd8), mRNA [NM_001008348]                                                               | <b>33,995</b> |
| Sf1          | Rattus norvegicus splicing factor 1 (Sf1), transcript variant 2, mRNA [NM_058210]                                                     | <b>33,982</b> |
| Haus2        | PREDICTED: Rattus norvegicus HAUS augmin-like complex, subunit 2, transcript variant 1 (Haus2), mRNA [XM_001053441]                   | <b>33,971</b> |
| 0            | Unknown                                                                                                                               | <b>33,960</b> |
| Rab36        | Rattus norvegicus RAB36, member RAS oncogene family (Rab36), mRNA [NM_001109589]                                                      | <b>33,947</b> |
| RGD1563216   | Rattus norvegicus similar to HESB like domain containing 1 (RGD1563216), mRNA [NM_001109278]                                          | <b>33,936</b> |
| Vamp1        | Rattus norvegicus vesicle-associated membrane protein 1 (Vamp1), mRNA [NM_013090]                                                     | <b>33,917</b> |
| 0            | E3 ubiquitin-protein ligase HUWE1 [Source:UniProtKB/Swiss-Prot;Acc:P51593] [ENSRNOT00000068719]                                       | <b>33,914</b> |
| 0            | Rattus norvegicus similar to 60S RIBOSOMAL PROTEIN L29 (P23) (LOC302428), mRNA [XM_228586]                                            | <b>33,910</b> |
| Oxsr1        | Rattus norvegicus oxidative-stress responsive 1 (Oxsr1), mRNA [NM_001108194]                                                          | <b>33,906</b> |
| Lin52        | Similar to CG15929-PA (Predicted), isoform CRA_aUncharacterized protein [Source:UniProtKB/TrEMBL;Acc:D4A6T8] [ENSRNOT00000064426]     | <b>33,894</b> |
| Tsc2         | Rattus norvegicus tuberous sclerosis 2 (Tsc2), mRNA [NM_012680]                                                                       | <b>33,880</b> |
| Prkaa1       | Rattus norvegicus protein kinase, AMP-activated, alpha 1 catalytic subunit (Prkaa1), mRNA [NM_019142]                                 | <b>33,864</b> |
| 0            | Unknown                                                                                                                               | <b>33,864</b> |
| 0            | MMU64033 Tera {Mus musculus} (exp=-1; wgp=0; cg=0), partial (13%) [TC591393]                                                          | <b>33,862</b> |
| Klf12        | Rattus norvegicus Kruppel-like factor 12 (Klf12), mRNA [NM_001107281]                                                                 | <b>33,857</b> |
| Pbx2         | Rattus norvegicus pre-B-cell leukemia homeobox 2 (Pbx2), mRNA [NM_001002828]                                                          | <b>33,842</b> |
| Plcb4        | Rattus norvegicus phospholipase C, beta 4 (Plcb4), mRNA [NM_024353]                                                                   | <b>33,840</b> |
| Olr1694      | Rattus norvegicus olfactory receptor 1694 (Olr1694), mRNA [NM_001001110]                                                              | <b>33,838</b> |
| Wdfy3        | Rattus norvegicus WD repeat and FYVE domain containing 3 (Wdfy3), mRNA [NM_001170551]                                                 | <b>33,829</b> |
| Rgma         | Rattus norvegicus RGM domain family, member A (Rgma), mRNA [NM_001107524]                                                             | <b>33,819</b> |
| Kirrel3      | Rattus norvegicus kin of IRRE like 3 (Drosophila) (Kirrel3), mRNA [NM_001048215]                                                      | <b>33,795</b> |
| Dyrk1a       | Rattus norvegicus dual-specificity tyrosine-(Y)-phosphorylation regulated kinase 1A (Dyrk1a), mRNA [NM_012791]                        | <b>33,734</b> |
| Map4         | Rattus norvegicus microtubule-associated protein 4 (Map4), mRNA [NM_001024278]                                                        | <b>33,726</b> |
| LOC100270669 | Rattus norvegicus hypothetical protein LOC100270669 (LOC100270669), mRNA [NM_001144957]                                               | <b>33,718</b> |
| 0            | Unknown                                                                                                                               | <b>33,717</b> |
| Gtf3c5       | Rattus norvegicus general transcription factor IIIC, polypeptide 5 (Gtf3c5), mRNA [NM_001079941]                                      | <b>33,691</b> |
| Dnmt3a       | Rattus norvegicus DNA (cytosine-5-)-methyltransferase 3 alpha (Dnmt3a), transcript variant 1, mRNA [NM_001003958]                     | <b>33,682</b> |
| Rnf32        | Rattus norvegicus ring finger protein 32 (Rnf32), mRNA [NM_001012095]                                                                 | <b>33,677</b> |
| Fam70a       | Rattus norvegicus family with sequence similarity 70, member A (Fam70a), mRNA [NM_182822]                                             | <b>33,677</b> |
| Slc17a7      | Rattus norvegicus solute carrier family 17 (sodium-dependent inorganic phosphate cotransporter), member 7 (Slc17a7), mRNA [NM_053859] | <b>33,661</b> |
| Dnajc16      | Rattus norvegicus DnaJ (Hsp40) homolog, subfamily C, member 16 (Dnajc16), mRNA [NM_001014194]                                         | <b>33,654</b> |

|            |                                                                                                                                          |               |
|------------|------------------------------------------------------------------------------------------------------------------------------------------|---------------|
| Tbp        | Rattus norvegicus TATA box binding protein (Tbp), mRNA [NM_001004198]                                                                    | <b>33,645</b> |
| Cdc42bpa   | Rattus norvegicus CDC42 binding protein kinase alpha (Cdc42bpa), mRNA [NM_053657]                                                        | <b>33,631</b> |
| Ube2v1     | Rattus norvegicus ubiquitin-conjugating enzyme E2 variant 1 (Ube2v1), mRNA [NM_001110345]                                                | <b>33,614</b> |
| Acbd3      | Rattus norvegicus acyl-Coenzyme A binding domain containing 3 (Acbd3), mRNA [NM_182843]                                                  | <b>33,594</b> |
| Lsm7       | Rattus norvegicus LSM7 homolog, U6 small nuclear RNA associated (S. cerevisiae) (Lsm7), mRNA [NM_001108732]                              | <b>33,577</b> |
| Lrrc57     | Rattus norvegicus leucine rich repeat containing 57 (Lrrc57), mRNA [NM_001012354]                                                        | <b>33,576</b> |
| Pgc        | Rattus norvegicus progastricsin (pepsinogen C) (Pgc), mRNA [NM_133284]                                                                   | <b>33,564</b> |
| Gca        | Rattus norvegicus granalcalcin (Gca), mRNA [NM_001106483]                                                                                | <b>33,559</b> |
| 0          | Uncharacterized protein [Source:UniProtKB/TrEMBL;Acc:D3ZIJ6] [ENSRNOT00000041124]                                                        | <b>33,553</b> |
| Slc4a4     | Rattus norvegicus solute carrier family 4, sodium bicarbonate cotransporter, member 4 (Slc4a4), mRNA [NM_053424]                         | <b>33,535</b> |
| 0          | PREDICTED: Rattus norvegicus WAP four-disulfide core domain 6A (Wfdc6a), mRNA [XM_001062561]                                             | <b>33,534</b> |
| 0          | Unknown                                                                                                                                  | <b>33,533</b> |
| 0          | Unknown                                                                                                                                  | <b>33,515</b> |
| Hmgn2      | Rattus norvegicus high mobility group nucleosomal binding domain 2 (Hmgn2), mRNA [NM_001025624]                                          | <b>33,500</b> |
| LOC498606  | Rattus norvegicus hypothetical protein LOC498606 (LOC498606), mRNA [NM_001025143]                                                        | <b>33,496</b> |
| Wdr48      | Rattus norvegicus WD repeat domain 48 (Wdr48), mRNA [NM_001135895]                                                                       | <b>33,486</b> |
| 0          | PREDICTED: Rattus norvegicus extracellular leucine-rich repeat and fibronectin type III domain containing 2 (Elfn2), miscRNA [XR_086301] | <b>33,480</b> |
| Gng8       | Rattus norvegicus guanine nucleotide binding protein (G protein), gamma 8 (Gng8), mRNA [NM_139185]                                       | <b>33,477</b> |
| 0          | AGENCOURT_31543064 NIH_MGC_269 Rattus norvegicus cDNA clone IMAGE:7462807 5', mRNA sequence [CV121387]                                   | <b>33,473</b> |
| Papola     | Rattus norvegicus poly (A) polymerase alpha (Papola), mRNA [NM_001108056]                                                                | <b>33,468</b> |
| Shpk       | Rattus norvegicus sedoheptulokinase (Shpk), mRNA [NM_001033682]                                                                          | <b>33,468</b> |
| 0          | Ab1-334 [Source:UniProtKB/TrEMBL;Acc:Q7TP85] [ENSRNOT00000032968]                                                                        | <b>33,462</b> |
| Cetn4      | Unknown                                                                                                                                  | <b>33,445</b> |
| Pcsk4      | Rattus norvegicus proprotein convertase subtilisin/kexin type 4 (Pcsk4), mRNA [NM_133559]                                                | <b>33,439</b> |
| 0          | UI-R-FS0-crv-o-03-0-UI.s1 UI-R-FS0 Rattus norvegicus cDNA clone UI-R-FS0-crv-o-03-0-UI 3', mRNA sequence [CB328432]                      | <b>33,418</b> |
| Fbxo44     | Rattus norvegicus TL0AAA48YG12 mRNA sequence. [FQ213337]                                                                                 | <b>33,416</b> |
| RGD1311575 | PREDICTED: Rattus norvegicus hypothetical LOC289568 (RGD1311575), mRNA [XM_002724955]                                                    | <b>33,400</b> |
| Chrm4      | Rattus norvegicus cholinergic receptor, muscarinic 4 (Chrm4), mRNA [NM_031547]                                                           | <b>33,347</b> |
| Pctk1      | Rattus norvegicus PCTAIRE protein kinase 1 (Pctk1), transcript variant 1, mRNA [NM_001004132]                                            | <b>33,321</b> |
| 0          | Unknown                                                                                                                                  | <b>33,287</b> |
| Foxn3      | Rattus norvegicus forkhead box N3 (Foxn3), mRNA [NM_001108047]                                                                           | <b>33,271</b> |
| 0          | Unknown                                                                                                                                  | <b>33,267</b> |
| 0          | Rattus norvegicus TL0AAA46YN14 mRNA sequence. [FQ213594]                                                                                 | <b>33,265</b> |
| Slc9a1     | Rattus norvegicus solute carrier family 9 (sodium/hydrogen exchanger), member 1 (Slc9a1), mRNA [NM_012652]                               | <b>33,251</b> |

|            |                                                                                                                                                                |               |
|------------|----------------------------------------------------------------------------------------------------------------------------------------------------------------|---------------|
| Rai14      | Rattus norvegicus retinoic acid induced 14 (Rai14), mRNA [NM_001011947]                                                                                        | <b>33,242</b> |
| Nacc2      | Rattus norvegicus nucleus accumbens associated 2, BEN and BTB (POZ) domain containing (Nacc2), mRNA [NM_001100533]                                             | <b>33,240</b> |
| 0          | Unknown                                                                                                                                                        | <b>33,231</b> |
| LOC678880  | PREDICTED: Rattus norvegicus similar to mammalian retrotransposon derived 8b (LOC678880), mRNA [XM_001053139]                                                  | <b>33,224</b> |
| Abcd2      | Rattus norvegicus ATP-binding cassette, subfamily D (ALD), member 2 (Abcd2), mRNA [NM_033352]                                                                  | <b>33,199</b> |
| Fiz1       | Rattus norvegicus FLT3-interacting zinc finger 1 (Fiz1), mRNA [NM_001106223]                                                                                   | <b>33,193</b> |
| Pi16       | Rattus norvegicus peptidase inhibitor 16 (Pi16), mRNA [NM_001170481]                                                                                           | <b>33,146</b> |
| Prr12      | Uncharacterized protein [Source:UniProtKB/TrEMBL;Acc:D4A6M5] [ENSRNOT00000038067]                                                                              | <b>33,141</b> |
| Ptp4a1     | Rattus norvegicus protein tyrosine phosphatase type IVA, member 1 (Ptp4a1), mRNA [NM_031579]                                                                   | <b>33,101</b> |
| Psme4      | Rattus norvegicus proteasome (prosome, macropain) activator subunit 4 (Psme4), mRNA [NM_001025140]                                                             | <b>33,100</b> |
| Tomm40b    | Rattus norvegicus translocase of outer mitochondrial membrane 40 homolog B (yeast) (Tomm40b), nuclear gene encoding mitochondrial protein, mRNA [NM_001083338] | <b>33,085</b> |
| 0          | BT006320 At1g66470 {Arabidopsis thaliana} (exp=-1; wgp=0; cg=0), partial (5%) [TC589845]                                                                       | <b>33,077</b> |
| 0          | Q87VI1_PSESM (Q87VI1) Rhodanese domain protein/phosphatidylserine decarboxylase, partial (3%) [TC610837]                                                       | <b>33,056</b> |
| Cdh13      | Rattus norvegicus cadherin 13 (Cdh13), mRNA [NM_138889]                                                                                                        | <b>33,055</b> |
| Bsn        | Rattus norvegicus bassoon (Bsn), mRNA [NM_019146]                                                                                                              | <b>33,047</b> |
| Ncan       | Rattus norvegicus neurocan (Ncan), mRNA [NM_031653]                                                                                                            | <b>33,046</b> |
| Cnot3      | Rattus norvegicus CCR4-NOT transcription complex, subunit 3 (Cnot3), mRNA [NM_001107471]                                                                       | <b>33,045</b> |
| Eps15      | Rattus norvegicus epidermal growth factor receptor pathway substrate 15 (Eps15), mRNA [NM_001009424]                                                           | <b>33,042</b> |
| Lgi3       | Rattus norvegicus leucine-rich repeat LGI family, member 3 (Lgi3), mRNA [NM_001107277]                                                                         | <b>33,034</b> |
| Uvrag      | Rattus norvegicus UV radiation resistance associated gene (Uvrag), mRNA [NM_001107536]                                                                         | <b>33,020</b> |
| LOC684399  | PREDICTED: Rattus norvegicus similar to 60S ribosomal protein L29 (P23) (LOC684399), mRNA [XM_001070213]                                                       | <b>33,006</b> |
| Tmem108    | PREDICTED: Rattus norvegicus transmembrane protein 108 (Tmem108), mRNA [XM_217247]                                                                             | <b>32,988</b> |
| Tmco4      | Rattus norvegicus transmembrane and coiled-coil domains 4 (Tmco4), mRNA [NM_001034949]                                                                         | <b>32,971</b> |
| RGD1304884 | Rattus norvegicus similar to RIKEN cDNA 6430548M08 (RGD1304884), mRNA [NM_001107436]                                                                           | <b>32,964</b> |
| Snap25     | Rattus norvegicus synaptosomal-associated protein 25 (Snap25), mRNA [NM_030991]                                                                                | <b>32,960</b> |
| Pcbp2      | Rattus norvegicus poly(rC) binding protein 2 (Pcbp2), mRNA [NM_001013223]                                                                                      | <b>32,951</b> |
| Slc35c1    | Rattus norvegicus solute carrier family 35, member C1 (Slc35c1), mRNA [NM_001107748]                                                                           | <b>32,935</b> |
| Rgl1       | Rattus norvegicus ral guanine nucleotide dissociation stimulator,-like 1 (Rgl1), mRNA [NM_001105957]                                                           | <b>32,921</b> |
| Dazap2     | Rattus norvegicus DAZ associated protein 2 (Dazap2), mRNA [NM_001013107]                                                                                       | <b>32,920</b> |
| Fto        | Rattus norvegicus fat mass and obesity associated (Fto), mRNA [NM_001039713]                                                                                   | <b>32,911</b> |
| Nfyc       | Rattus norvegicus nuclear transcription factor-Y gamma (Nfyc), mRNA [NM_012866]                                                                                | <b>32,908</b> |
| Ttc9c      | Rattus norvegicus tetratricopeptide repeat domain 9C (Ttc9c), mRNA [NM_001007693]                                                                              | <b>32,900</b> |
| 0          | Potassium voltage-gated channel subfamily D member 3 [Source:UniProtKB/Swiss-Prot;Acc:Q62897] [ENSRNOT00000019997]                                             | <b>32,896</b> |



|           |                                                                                                                      |               |
|-----------|----------------------------------------------------------------------------------------------------------------------|---------------|
| Cnnm3     | Rattus norvegicus cyclin M3 (Cnnm3), mRNA [NM_001106901]                                                             | <b>32,885</b> |
| Rb1       | Rattus norvegicus retinoblastoma 1 (Rb1), mRNA [NM_017045]                                                           | <b>32,884</b> |
| Tuba3b    | Rattus norvegicus tubulin, alpha 3B (Tuba3b), mRNA [NM_001024336]                                                    | <b>32,879</b> |
| Palm      | Rattus norvegicus paralemmin (Palm), mRNA [NM_130829]                                                                | <b>32,865</b> |
| Rimklb    | Uncharacterized protein [Source:UniProtKB/TrEMBL;Acc:D3ZJ79] [ENSRNOT00000032690]                                    | <b>32,863</b> |
| Dvl3      | Rattus norvegicus dishevelled, dsh homolog 3 (Drosophila) (Dvl3), mRNA [NM_001107081]                                | <b>32,860</b> |
| Rqcd1     | Rattus norvegicus rcd1 (required for cell differentiation) homolog 1 (S. pombe) (Rqcd1), mRNA [NM_001009357]         | <b>32,858</b> |
| Eif4e     | Rattus norvegicus eukaryotic translation initiation factor 4E (Eif4e), mRNA [NM_053974]                              | <b>32,841</b> |
| 0         | Unknown                                                                                                              | <b>32,821</b> |
| Sec14i5   | Rattus norvegicus SEC14-like 5 (S. cerevisiae) (Sec14i5), mRNA [NM_001135710]                                        | <b>32,810</b> |
| Stim1     | Rattus norvegicus stromal interaction molecule 1 (Stim1), mRNA [NM_001108496]                                        | <b>32,805</b> |
| Nop2      | Rattus norvegicus NOP2 nucleolar protein homolog (yeast) (Nop2), mRNA [NM_001191785]                                 | <b>32,801</b> |
| Zc3h10    | Rattus norvegicus zinc finger CCCH type containing 10 (Zc3h10), mRNA [NM_001191090]                                  | <b>32,800</b> |
| Prrx1     | Rattus norvegicus paired related homeobox 1 (Prrx1), mRNA [NM_153821]                                                | <b>32,796</b> |
| Tbc1d9    | Rattus norvegicus TBC1 domain family, member 9 (Tbc1d9), mRNA [NM_001134539]                                         | <b>32,778</b> |
| Napepld   | Rattus norvegicus N-acyl phosphatidylethanolamine phospholipase D (Napepld), mRNA [NM_199381]                        | <b>32,769</b> |
| Fndc5     | PREDICTED: Rattus norvegicus fibronectin type III domain containing 5 (Fndc5), mRNA [XM_002729542]                   | <b>32,769</b> |
| Padi2     | Rattus norvegicus peptidyl arginine deiminase, type II (Padi2), mRNA [NM_017226]                                     | <b>32,763</b> |
| 0         | Uncharacterized protein [Source:UniProtKB/TrEMBL;Acc:D3ZGV8] [ENSRNOT00000004410]                                    | <b>32,744</b> |
| Slc16a3   | Rattus norvegicus solute carrier family 16, member 3 (monocarboxylic acid transporter 4) (Slc16a3), mRNA [NM_030834] | <b>32,725</b> |
| LOC294154 | Rattus norvegicus similar to chromosome 6 open reading frame 106 isoform a (LOC294154), mRNA [NM_001039607]          | <b>32,712</b> |
| Tsc2      | Rattus norvegicus tuberous sclerosis 2 (Tsc2), mRNA [NM_012680]                                                      | <b>32,652</b> |
| Vom2r15   | Rattus norvegicus vomeronasal 2 receptor, 15 (Vom2r15), mRNA [NM_001099490]                                          | <b>32,646</b> |
| Rab11b    | Rattus norvegicus RAB11B, member RAS oncogene family (Rab11b), mRNA [NM_032617]                                      | <b>32,636</b> |
| 0         | PREDICTED: Rattus norvegicus similar to procollagen, type VI, alpha 3 isoform 4 (RGD1564060), mRNA [XM_002727099]    | <b>32,614</b> |
| Vps25     | Rattus norvegicus vacuolar protein sorting 25 homolog (S. cerevisiae) (Vps25), mRNA [NM_001173451]                   | <b>32,610</b> |
| Tmem164   | Rattus norvegicus transmembrane protein 164 (Tmem164), mRNA [NM_001109014]                                           | <b>32,600</b> |
| 0         | Unknown                                                                                                              | <b>32,597</b> |
| Hpcal1    | Rattus norvegicus hippocalcin-like 1 (Hpcal1), mRNA [NM_017356]                                                      | <b>32,591</b> |
| Med15     | Rattus norvegicus mediator complex subunit 15 (Med15), mRNA [NM_001108325]                                           | <b>32,590</b> |
| Hspa12a   | Rattus norvegicus heat shock protein 12A (Hspa12a), mRNA [NM_001107445]                                              | <b>32,590</b> |
| LOC499573 | Rattus norvegicus LRRGT00056 (LOC499573), mRNA [NM_001047947]                                                        | <b>32,556</b> |
| 0         | Unknown                                                                                                              | <b>32,540</b> |
| Vps37b    | Rattus norvegicus vacuolar protein sorting 37 homolog B (S. cerevisiae) (Vps37b), mRNA [NM_001105928]                | <b>32,536</b> |

|         |                                                                                                                                                                  |               |
|---------|------------------------------------------------------------------------------------------------------------------------------------------------------------------|---------------|
| Chst12  | Rattus norvegicus carbohydrate (chondroitin 4) sulfotransferase 12 (Chst12), mRNA [NM_001037775]                                                                 | <b>32,530</b> |
| Otog    | Rattus norvegicus otogelin (Otog), mRNA [NM_001106262]                                                                                                           | <b>32,502</b> |
| Cav1    | Rattus norvegicus caveolin 1, caveolae protein (Cav1), transcript variant 2, mRNA [NM_133651]                                                                    | <b>32,492</b> |
| Pctk3   | Rattus norvegicus PCTAIRE protein kinase 3 (Pctk3), mRNA [NM_001100506]                                                                                          | <b>32,492</b> |
| Tsga10  | Rattus norvegicus testis specific 10 (Tsga10), mRNA [NM_001030022]                                                                                               | <b>32,492</b> |
| Lmf1    | Uncharacterized protein [Source:UniProtKB/TrEMBL;Acc:D3ZF16] [ENSRNOT0000000246]                                                                                 | <b>32,476</b> |
| Mast3   | Rattus norvegicus microtubule associated serine/threonine kinase 3 (Mast3), mRNA [NM_001134796]                                                                  | <b>32,468</b> |
| Aldh4a1 | Rattus norvegicus aldehyde dehydrogenase 4 family, member A1 (Aldh4a1), nuclear gene encoding mitochondrial protein, mRNA [NM_001134698]                         | <b>32,453</b> |
| Lrrn2   | Rattus norvegicus leucine rich repeat neuronal 2 (Lrrn2), mRNA [NM_001177368]                                                                                    | <b>32,447</b> |
| Pcgf2   | Rattus norvegicus polycomb group ring finger 2 (Pcgf2), mRNA [NM_001105836]                                                                                      | <b>32,435</b> |
| Uxt     | Rattus norvegicus ubiquitously expressed transcript (Uxt), mRNA [NM_001006982]                                                                                   | <b>32,433</b> |
| Gab1    | Rattus norvegicus GRB2-associated binding protein 1 (Gab1), mRNA [NM_001108444]                                                                                  | <b>32,428</b> |
| Mocs1   | Rattus norvegicus molybdenum cofactor synthesis 1 (Mocs1), mRNA [NM_001106881]                                                                                   | <b>32,417</b> |
| Rac1    | Rattus norvegicus ras-related C3 botulinum toxin substrate 1 (Rac1), mRNA [NM_134366]                                                                            | <b>32,383</b> |
| 0       | BTB/POZ domain-containing protein KCTD1 [Source:UniProtKB/Swiss-Prot;Acc:Q8R4G8] [ENSRNOT00000061504]                                                            | <b>32,366</b> |
| Adap1   | Rattus norvegicus ArfGAP with dual PH domains 1 (Adap1), mRNA [NM_133567]                                                                                        | <b>32,352</b> |
| Prkce   | Rattus norvegicus protein kinase C, epsilon (Prkce), mRNA [NM_017171]                                                                                            | <b>32,342</b> |
| Ogdh    | Rattus norvegicus TL0ADA19YE17 mRNA sequence. [FQ222842]                                                                                                         | <b>32,339</b> |
| Olr791  | Rattus norvegicus olfactory receptor 791 (Olr791), mRNA [NM_001000580]                                                                                           | <b>32,329</b> |
| Nrxn3   | Rattus norvegicus neurexin 3 (Nrxn3), mRNA [NM_053817]                                                                                                           | <b>32,313</b> |
| Ccr111  | Rattus norvegicus chemokine (C-C motif) receptor 1-like 1 (Ccr111), mRNA [NM_001106872]                                                                          | <b>32,307</b> |
| Ncapd2  | Condensin complex subunit 1 [Source:UniProtKB/TrEMBL;Acc:D3ZHP6] [ENSRNOT00000025889]                                                                            | <b>32,306</b> |
| Vac14   | Rattus norvegicus Vac14 homolog (S. cerevisiae) (Vac14), mRNA [NM_177930]                                                                                        | <b>32,292</b> |
| Sema4a  | Rattus norvegicus sema domain, immunoglobulin domain (Ig), transmembrane domain (TM) and short cytoplasmic domain, (semaphorin) 4A (Sema4a), mRNA [NM_001012078] | <b>32,291</b> |
| P2rx3   | Rattus norvegicus purinergic receptor P2X, ligand-gated ion channel, 3 (P2rx3), mRNA [NM_031075]                                                                 | <b>32,290</b> |
| Grm2    | Rattus norvegicus glutamate receptor, metabotropic 2 (Grm2), mRNA [NM_001105711]                                                                                 | <b>32,285</b> |
| Mgrn1   | Rattus norvegicus mahogunin, ring finger 1 (Mgrn1), mRNA [NM_001013964]                                                                                          | <b>32,281</b> |
| Foxp4   | Rattus norvegicus forkhead box P4 (Foxp4), mRNA [NM_001108788]                                                                                                   | <b>32,262</b> |
| Gatad2b | Rattus norvegicus GATA zinc finger domain containing 2B (Gatad2b), mRNA [NM_001024888]                                                                           | <b>32,231</b> |
| Rab1b   | Rattus norvegicus RAB1B, member RAS oncogene family (Rab1b), mRNA [NM_001109979]                                                                                 | <b>32,228</b> |
| Grip1   | Rattus norvegicus glutamate receptor interacting protein 1 (Grip1), mRNA [NM_032069]                                                                             | <b>32,216</b> |
| Mll5    | PREDICTED: Rattus norvegicus myeloid/lymphoid or mixed-lineage leukemia 5 (trithorax homolog, Drosophila) (Mll5), mRNA [XM_231287]                               | <b>32,216</b> |
| 0       | Uncharacterized protein [Source:UniProtKB/TrEMBL;Acc:D4A5I4] [ENSRNOT00000037100]                                                                                | <b>32,215</b> |

|            |                                                                                                                                                                  |               |
|------------|------------------------------------------------------------------------------------------------------------------------------------------------------------------|---------------|
| 0          | Uncharacterized protein [Source:UniProtKB/TrEMBL;Acc:D3ZM70] [ENSRNOT00000006897]                                                                                | <b>32,214</b> |
| RGD1310453 | Rattus norvegicus similar to hypothetical protein FLJ23451 (RGD1310453), mRNA [NM_001134463]                                                                     | <b>32,202</b> |
| Pcdhga7    | Rattus norvegicus protocadherin gamma subfamily A, 7 (Pcdhga7), mRNA [NM_001014773]                                                                              | <b>32,195</b> |
| 0          | Unknown                                                                                                                                                          | <b>32,184</b> |
| RGD1305733 | Rattus norvegicus similar to RIKEN cDNA 2900011O08 (RGD1305733), mRNA [NM_001014114]                                                                             | <b>32,178</b> |
| Dkk3       | Rattus norvegicus dickkopf homolog 3 (Xenopus laevis) (Dkk3), mRNA [NM_138519]                                                                                   | <b>32,176</b> |
| Trib1      | Rattus norvegicus tribbles homolog 1 (Drosophila) (Trib1), mRNA [NM_023985]                                                                                      | <b>32,159</b> |
| Ccdc116    | Rattus norvegicus coiled-coil domain containing 116 (Ccdc116), mRNA [NM_001024740]                                                                               | <b>32,150</b> |
| Dpp8       | Rattus norvegicus dipeptidylpeptidase 8 (Dpp8), mRNA [NM_001108159]                                                                                              | <b>32,124</b> |
| RGD1311493 | Uncharacterized protein [Source:UniProtKB/TrEMBL;Acc:D4A5H7] [ENSRNOT00000028407]                                                                                | <b>32,119</b> |
| Ikzf5      | Rattus norvegicus IKAROS family zinc finger 5 (Ikzf5), mRNA [NM_001107555]                                                                                       | <b>32,095</b> |
| 0          | Unknown                                                                                                                                                          | <b>32,092</b> |
| Patl1      | Rattus norvegicus protein associated with topoisomerase II homolog 1 (yeast) (Patl1), mRNA [NM_001108520]                                                        | <b>32,090</b> |
| Sema4b     | Rattus norvegicus sema domain, immunoglobulin domain (Ig), transmembrane domain (TM) and short cytoplasmic domain, (semaphorin) 4B (Sema4b), mRNA [NM_001170462] | <b>32,087</b> |
| Plekhg1    | Rattus norvegicus pleckstrin homology domain containing, family G (with RhoGef domain) member 1 (Plekhg1), mRNA [NM_001190999]                                   | <b>32,085</b> |
| Srrm1      | Rattus norvegicus serine/arginine repetitive matrix 1 (Srrm1), mRNA [NM_001107986]                                                                               | <b>32,082</b> |
| Prkcb      | Rattus norvegicus protein kinase C, beta (Prkcb), transcript variant 1, mRNA [NM_012713]                                                                         | <b>32,074</b> |
| 0          | Unknown                                                                                                                                                          | <b>32,066</b> |
| Clip2      | Rattus norvegicus CAP-GLY domain containing linker protein 2 (Clip2), mRNA [NM_021997]                                                                           | <b>32,062</b> |
| Tbl1x      | Rattus norvegicus transducin (beta)-like 1 X-linked (Tbl1x), mRNA [NM_001106964]                                                                                 | <b>32,042</b> |
| Tmub2      | Rattus norvegicus transmembrane and ubiquitin-like domain containing 2 (Tmub2), mRNA [NM_001031651]                                                              | <b>32,038</b> |
| Cic        | Rattus norvegicus capicua homolog (Drosophila) (Cic), mRNA [NM_001107490]                                                                                        | <b>32,034</b> |
| Meis1      | Rattus norvegicus Meis homeobox 1 (Meis1), mRNA [NM_001134702]                                                                                                   | <b>32,030</b> |
| Spock2     | Rattus norvegicus sparc/osteonectin, cwcv and kazal-like domains proteoglycan 2 (Spock2), mRNA [NM_001108533]                                                    | <b>32,028</b> |
| Shroom2    | Rattus norvegicus shroom family member 2 (Shroom2), mRNA [NM_001047893]                                                                                          | <b>32,027</b> |
| 0          | Uncharacterized protein [Source:UniProtKB/TrEMBL;Acc:D3ZGM0] [ENSRNOT000000056197]                                                                               | <b>31,989</b> |
| Lrrc41     | Rattus norvegicus leucine rich repeat containing 41 (Lrrc41), mRNA [NM_001009710]                                                                                | <b>31,973</b> |
| Sv2b       | Rattus norvegicus synaptic vesicle glycoprotein 2b (Sv2b), mRNA [NM_057207]                                                                                      | <b>31,966</b> |
| LOC690402  | Rattus norvegicus similar to Short palate, lung and nasal epithelium carcinoma-associated protein 3 homolog precursor (LOC690402), mRNA [NM_001109588]           | <b>31,964</b> |
| LOC685179  | Uncharacterized protein [Source:UniProtKB/TrEMBL;Acc:D3ZPF5] [ENSRNOT00000028244]                                                                                | <b>31,940</b> |
| 0          | Unknown                                                                                                                                                          | <b>31,925</b> |
| 0          | Uncharacterized protein [Source:UniProtKB/TrEMBL;Acc:D3ZGV8] [ENSRNOT00000004410]                                                                                | <b>31,925</b> |

|           |                                                                                                                                                   |               |
|-----------|---------------------------------------------------------------------------------------------------------------------------------------------------|---------------|
| Lef1      | Rattus norvegicus lymphoid enhancer binding factor 1 (Lef1), mRNA [NM_130429]                                                                     | <b>31,918</b> |
| Car15     | Rattus norvegicus carbonic anhydrase 15 (Car15), mRNA [NM_001105901]                                                                              | <b>31,902</b> |
| LOC305806 | Rattus norvegicus similar to glutaredoxin 1 (thioltransferase); glutaredoxin (LOC305806), mRNA [NM_001013993]                                     | <b>31,870</b> |
| Slc41a2   | Rattus norvegicus solute carrier family 41, member 2 (Slc41a2), mRNA [NM_001108742]                                                               | <b>31,856</b> |
| Cldn19    | Rattus norvegicus claudin 19 (Cldn19), mRNA [NM_001008514]                                                                                        | <b>31,855</b> |
| Sobpl     | Rattus norvegicus sine oculis-binding protein homolog-like (Drosophila) (Sobpl), mRNA [NM_001104640]                                              | <b>31,838</b> |
| Col4a2    | PREDICTED: Rattus norvegicus collagen, type IV, alpha 2 (Col4a2), mRNA [XM_001076134]                                                             | <b>31,829</b> |
| Sipa1l1   | Rattus norvegicus signal-induced proliferation-associated 1 like 1 (Sipa1l1), mRNA [NM_139330]                                                    | <b>31,829</b> |
| 0         | RVL8997 Wackym-Soares normalized rat vestibular cDNA library Rattus norvegicus cDNA 5', mRNA sequence [DV718414]                                  | <b>31,821</b> |
| 0         | Unknown                                                                                                                                           | <b>31,820</b> |
| Srd5a1    | Rattus norvegicus steroid-5-alpha-reductase, alpha polypeptide 1 (3-oxo-5 alpha-steroid delta 4-dehydrogenase alpha 1) (Srd5a1), mRNA [NM_017070] | <b>31,819</b> |
| LOC683844 | PREDICTED: Rattus norvegicus similar to RING finger protein 11 (NEDD4 WW domain-binding protein 2) (Sid 1669) (LOC683844), mRNA [XM_001067720]    | <b>31,817</b> |
| Rims2     | Rattus norvegicus regulating synaptic membrane exocytosis 2 (Rims2), transcript variant 1, mRNA [NM_053945]                                       | <b>31,811</b> |
| 0         | Unknown                                                                                                                                           | <b>31,785</b> |
| Dact3     | Rattus norvegicus dapper, antagonist of beta-catenin, homolog 3 (Xenopus laevis) (Dact3), mRNA [NM_001191947]                                     | <b>31,763</b> |
| LOC678741 | PREDICTED: Rattus norvegicus similar to Zinc finger CCCH-type domain containing protein 6 (LOC678741), mRNA [XM_001053214]                        | <b>31,760</b> |
| Chrna5    | Rattus norvegicus cholinergic receptor, nicotinic, alpha 5 (Chrna5), mRNA [NM_017078]                                                             | <b>31,748</b> |
| 0         | Rattus norvegicus similar to ubiquitin-conjugating enzyme E2 variant 1 isoform b; DNA-binding protein (LOC296390), mRNA [XM_215948]               | <b>31,735</b> |
| 0         | Unknown                                                                                                                                           | <b>31,719</b> |
| LOC682988 | Rattus norvegicus similar to mediator of RNA polymerase II transcription, subunit 18 homolog (LOC682988), mRNA [NM_001115037]                     | <b>31,695</b> |
| 0         | Unknown                                                                                                                                           | <b>31,690</b> |
| B3gnt2    | Rattus norvegicus UDP-GlcNAc:betaGal beta-1,3-N-acetylglucosaminyltransferase 2 (B3gnt2), mRNA [NM_001107240]                                     | <b>31,679</b> |
| Zmiz2     | Rattus norvegicus zinc finger, MIZ-type containing 2 (Zmiz2), mRNA [NM_001100507]                                                                 | <b>31,679</b> |
| Abca1     | Rattus norvegicus ATP-binding cassette, subfamily A (ABC1), member 1 (Abca1), mRNA [NM_178095]                                                    | <b>31,677</b> |
| Rprd1b    | Rattus norvegicus regulation of nuclear pre-mRNA domain containing 1B (Rprd1b), mRNA [NM_001098727]                                               | <b>31,676</b> |
| LOC689927 | Rattus norvegicus similar to keratin associated protein 10-10 (LOC689927), mRNA [NM_001109555]                                                    | <b>31,675</b> |
| Dpy19l3   | Rattus norvegicus dpy-19-like 3 (C. elegans) (Dpy19l3), mRNA [NM_001135835]                                                                       | <b>31,641</b> |
| Pmp22     | Rattus norvegicus peripheral myelin protein 22 (Pmp22), mRNA [NM_017037]                                                                          | <b>31,624</b> |
| 0         | salt inducible kinase 2 Gene [Source:MGI Symbol;Acc:MGI:2445031] [ENSRNOT00000066893]                                                             | <b>31,623</b> |
| Nfic      | Rattus norvegicus nuclear factor I/C (Nfic), mRNA [NM_031567]                                                                                     | <b>31,618</b> |
| Arpp21    | Rattus norvegicus cAMP-regulated phosphoprotein 21 (Arpp21), transcript variant 1, mRNA [NM_001135046]                                            | <b>31,616</b> |
| Cfl2      | Rattus norvegicus cofilin 2, muscle (Cfl2), mRNA [NM_001108982]                                                                                   | <b>31,613</b> |

|            |                                                                                                                                                                    |               |
|------------|--------------------------------------------------------------------------------------------------------------------------------------------------------------------|---------------|
| Mybbp1a    | Rattus norvegicus MYB binding protein (P160) 1a (Mybbp1a), mRNA [NM_031668]                                                                                        | <b>31,611</b> |
| Nfu1       | Rattus norvegicus NFU1 iron-sulfur cluster scaffold homolog ( <i>S. cerevisiae</i> ) (Nfu1), nuclear gene encoding mitochondrial protein, mRNA [NM_001106606]      | <b>31,608</b> |
| Ptp4a2     | Rattus norvegicus protein tyrosine phosphatase 4a2 (Ptp4a2), mRNA [NM_053475]                                                                                      | <b>31,571</b> |
| Plod1      | Rattus norvegicus procollagen-lysine 1, 2-oxoglutarate 5-dioxygenase 1 (Plod1), mRNA [NM_053827]                                                                   | <b>31,566</b> |
| RGD1560601 | PREDICTED: Rattus norvegicus similar to Jumonji/ARID domain-containing protein 1C (SmcX protein) (RGD1560601), mRNA [XM_001064297]                                 | <b>31,560</b> |
| Pcdh7      | Rattus norvegicus protocadherin 7 (Pcdh7), mRNA [NM_001004087]                                                                                                     | <b>31,556</b> |
| Pank3      | Rattus norvegicus pantothenate kinase 3 (Pank3), mRNA [NM_001108272]                                                                                               | <b>31,548</b> |
| Nab2       | Rattus norvegicus Ngfi-A binding protein 2 (Nab2), mRNA [NM_001134874]                                                                                             | <b>31,534</b> |
| 0          | Unknown                                                                                                                                                            | <b>31,523</b> |
| Pygm       | Rattus norvegicus phosphorylase, glycogen, muscle (Pygm), mRNA [NM_012638]                                                                                         | <b>31,518</b> |
| Ogt        | Rattus norvegicus O-linked N-acetylglucosamine (GlcNAc) transferase (UDP-N-acetylglucosamine:polypeptide-N-acetylglucosaminyl transferase) (Ogt), mRNA [NM_017107] | <b>31,504</b> |
| C1ql3      | Rattus norvegicus complement component 1, q subcomponent-like 3 (C1ql3), mRNA [NM_001109403]                                                                       | <b>31,490</b> |
| Tmem138    | Rattus norvegicus transmembrane protein 138 (Tmem138), mRNA [NM_198777]                                                                                            | <b>31,484</b> |
| LOC691293  | PREDICTED: Rattus norvegicus similar to reproductive homeobox on chromosome X, 7 (LOC691293), mRNA [XM_001077586]                                                  | <b>31,479</b> |
| Apoc4      | Rattus norvegicus apolipoprotein C-IV (Apoc4), mRNA [NM_001109419]                                                                                                 | <b>31,472</b> |
| Msto1      | Rattus norvegicus misato homolog 1 ( <i>Drosophila</i> ) (Msto1), mRNA [NM_001106443]                                                                              | <b>31,463</b> |
| Rara       | Rattus norvegicus retinoic acid receptor, alpha (Rara), mRNA [NM_031528]                                                                                           | <b>31,455</b> |
| LOC301128  | Rattus norvegicus similar to jumonji domain containing 2B (LOC301128), mRNA [NM_001044236]                                                                         | <b>31,447</b> |
| Marcks1    | Rattus norvegicus MARCKS-like 1 (Marcks1), mRNA [NM_030862]                                                                                                        | <b>31,432</b> |
| Steap2     | Rattus norvegicus six transmembrane epithelial antigen of the prostate 2 (Steap2), mRNA [NM_001107846]                                                             | <b>31,421</b> |
| Btbd2      | PREDICTED: Rattus norvegicus BTB (POZ) domain containing 2 (Btbd2), mRNA [XM_576181]                                                                               | <b>31,411</b> |
| Pex19      | Rattus norvegicus peroxisomal biogenesis factor 19 (Pex19), transcript variant 1, mRNA [NM_001107375]                                                              | <b>31,410</b> |
| Zmym4      | Rattus norvegicus zinc finger, MYM-type 4 (Zmym4), mRNA [NM_001107982]                                                                                             | <b>31,408</b> |
| Ankrd45    | Uncharacterized protein [Source:UniProtKB/TrEMBL;Acc:D3Z8M5] [ENSRNOT00000003857]                                                                                  | <b>31,394</b> |
| Gosr2      | Rattus norvegicus golgi SNAP receptor complex member 2 (Gosr2), mRNA [NM_031685]                                                                                   | <b>31,381</b> |
| Coro1c     | Rattus norvegicus coronin, actin binding protein 1C (Coro1c), mRNA [NM_001109327]                                                                                  | <b>31,368</b> |
| Atf7       | Rattus norvegicus activating transcription factor 7 (Atf7), mRNA [NM_001108115]                                                                                    | <b>31,368</b> |
| Hdac7      | PREDICTED: Rattus norvegicus histone deacetylase 7 (Hdac7), mRNA [XM_001059057]                                                                                    | <b>31,366</b> |
| 0          | Unknown                                                                                                                                                            | <b>31,338</b> |
| Hs3st2     | Rattus norvegicus heparan sulfate (glucosamine) 3-O-sulfotransferase 2 (Hs3st2), mRNA [NM_181370]                                                                  | <b>31,334</b> |
| Sez6l      | Rattus norvegicus seizure related 6 homolog (mouse)-like (Sez6l), mRNA [NM_001134538]                                                                              | <b>31,328</b> |
| Spcs2      | Rattus norvegicus signal peptidase complex subunit 2 homolog ( <i>S. cerevisiae</i> ) (Spcs2), mRNA [NM_001191601]                                                 | <b>31,320</b> |

|            |                                                                                                                       |               |
|------------|-----------------------------------------------------------------------------------------------------------------------|---------------|
| Elk3       | Rattus norvegicus ELK3, ETS-domain protein (Elk3), mRNA [NM_001108743]                                                | <b>31,319</b> |
| Ehd1       | Rattus norvegicus EH-domain containing 1 (Ehd1), mRNA [NM_001011939]                                                  | <b>31,311</b> |
| Pla2g6     | Rattus norvegicus phospholipase A2, group VI (cytosolic, calcium-independent) (Pla2g6), mRNA [NM_001005560]           | <b>31,295</b> |
| 0          | Unknown                                                                                                               | <b>31,282</b> |
| Lppr5      | Rattus norvegicus lipid phosphate phosphatase-related protein type 5 (Lppr5), mRNA [NM_001107720]                     | <b>31,260</b> |
| RGD1310717 | Rattus norvegicus similar to RIKEN cDNA E030002O03 (RGD1310717), mRNA [NM_001106287]                                  | <b>31,250</b> |
| Dpysl2     | Rattus norvegicus dihydropyrimidinase-like 2 (Dpysl2), mRNA [NM_001105717]                                            | <b>31,238</b> |
| Pex19      | Rattus norvegicus peroxisomal biogenesis factor 19 (Pex19), transcript variant 2, mRNA [NM_001134777]                 | <b>31,218</b> |
| Mknk2      | Rattus norvegicus MAP kinase-interacting serine/threonine kinase 2 (Mknk2), mRNA [NM_001011985]                       | <b>31,213</b> |
| Slc8a2     | Rattus norvegicus solute carrier family 8 (sodium/calcium exchanger), member 2 (Slc8a2), mRNA [NM_078619]             | <b>31,207</b> |
| Abcg4      | Rattus norvegicus ATP-binding cassette, subfamily G (WHITE), member 4 (Abcg4), mRNA [NM_001106816]                    | <b>31,203</b> |
| Tspan7     | Rattus norvegicus tetraspanin 7 (Tspan7), mRNA [NM_001108815]                                                         | <b>31,190</b> |
| Hip1       | Rattus norvegicus huntingtin interacting protein 1 (Hip1), mRNA [NM_001100475]                                        | <b>31,166</b> |
| Slc24a3    | Rattus norvegicus solute carrier family 24 (sodium/potassium/calcium exchanger), member 3 (Slc24a3), mRNA [NM_053505] | <b>31,155</b> |
| Agfg2      | Rattus norvegicus ArfGAP with FG repeats 2 (Agfg2), mRNA [NM_001107131]                                               | <b>31,150</b> |
| Necab1     | Rattus norvegicus N-terminal EF-hand calcium binding protein 1 (Necab1), mRNA [NM_022302]                             | <b>31,149</b> |
| 0          | Uncharacterized protein [Source:UniProtKB/TrEMBL;Acc:D3ZWV1] [ENSRNOT00000048860]                                     | <b>31,131</b> |
| Pnpo       | Rattus norvegicus pyridoxine 5'-phosphate oxidase (Pnpo), mRNA [NM_022601]                                            | <b>31,116</b> |
| Slc25a44   | Rattus norvegicus solute carrier family 25, member 44 (Slc25a44), mRNA [NM_001108947]                                 | <b>31,108</b> |
| RGD1309079 | Rattus norvegicus similar to Ab2-095 (RGD1309079), mRNA [NM_001134472]                                                | <b>31,101</b> |
| MGC114440  | Rattus norvegicus similar to RIKEN cDNA 4930555I21 (MGC114440), mRNA [NM_001025772]                                   | <b>31,084</b> |
| RGD1307067 | Rattus norvegicus LOC362840 (RGD1307067), mRNA [NM_001173974]                                                         | <b>31,080</b> |
| Smad7      | Rattus norvegicus SMAD family member 7 (Smad7), mRNA [NM_030858]                                                      | <b>31,074</b> |
| Ksr1       | Rattus norvegicus kinase suppressor of ras 1 (Ksr1), mRNA [NM_001108284]                                              | <b>31,056</b> |
| Snx19      | Rattus norvegicus sorting nexin 19 (Snx19), mRNA [NM_001108131]                                                       | <b>31,045</b> |
| Tor1aip1   | Rattus norvegicus torsin A interacting protein 1 (Tor1aip1), mRNA [NM_145092]                                         | <b>31,043</b> |
| Dusp8      | Rattus norvegicus dual specificity phosphatase 8 (Dusp8), mRNA [NM_001108510]                                         | <b>31,041</b> |
| Eif4a1     | Rattus norvegicus eukaryotic translation initiation factor 4A, isoform 1 (Eif4a1), mRNA [NM_199372]                   | <b>31,039</b> |
| Lamtor1    | Rattus norvegicus RhoA activator C11orf59 homolog (Lamtor1), mRNA [NM_199102]                                         | <b>31,033</b> |
| Slc3a1     | Rattus norvegicus solute carrier family 3, member 1 (Slc3a1), mRNA [NM_017216]                                        | <b>31,029</b> |
| Tpm3       | Rattus norvegicus tropomyosin 3, gamma (Tpm3), transcript variant 2, mRNA [NM_173111]                                 | <b>31,021</b> |
| 0          | Rattus norvegicus cDNA clone IMAGE:7459750. [BC099100]                                                                | <b>31,010</b> |
| Ptk2b      | Rattus norvegicus PTK2B protein tyrosine kinase 2 beta (Ptk2b), mRNA [NM_017318]                                      | <b>31,005</b> |
| 0          | Unknown                                                                                                               | <b>30,978</b> |

|           |                                                                                                                                                                                             |        |
|-----------|---------------------------------------------------------------------------------------------------------------------------------------------------------------------------------------------|--------|
| Caskin1   | Rattus norvegicus CASK interacting protein 1 (Caskin1), mRNA [NM_080690]                                                                                                                    | 30,976 |
| Foxm1     | Rattus norvegicus forkhead box M1 (Foxm1), mRNA [NM_031633]                                                                                                                                 | 30,975 |
| 0         | Uncharacterized protein [Source:UniProtKB/TrEMBL;Acc:D3ZW02] [ENSRNOT00000036647]                                                                                                           | 30,951 |
| Chst11    | Rattus norvegicus carbohydrate (chondroitin 4) sulfotransferase 11 (Chst11), mRNA [NM_001108079]                                                                                            | 30,940 |
| Tpbg      | Rattus norvegicus trophoblast glycoprotein (Tpbg), mRNA [NM_031807]                                                                                                                         | 30,938 |
| Apoa5     | Rattus norvegicus apolipoprotein A-V (Apoa5), mRNA [NM_080576]                                                                                                                              | 30,929 |
| Fam5b     | Rattus norvegicus family with sequence similarity 5, member B (Fam5b), mRNA [NM_173115]                                                                                                     | 30,925 |
| Add2      | Rattus norvegicus adducin 2 (beta) (Add2), transcript variant 1, mRNA [NM_001109880]                                                                                                        | 30,923 |
| Dgki      | Rattus norvegicus diacylglycerol kinase, iota (Dgki), mRNA [NM_198782]                                                                                                                      | 30,880 |
| Hmg20b    | Rattus norvegicus high mobility group 20 B (Hmg20b), mRNA [NM_001108731]                                                                                                                    | 30,880 |
| Clasp2    | Rattus norvegicus cytoplasmic linker associated protein 2 (Clasp2), mRNA [NM_053722]                                                                                                        | 30,866 |
| 0         | Q69114_EBVG (Q69114) BZLF2 (Fragment), partial (21%) [TC636606]                                                                                                                             | 30,862 |
| Nsdhl     | Rattus norvegicus NAD(P) dependent steroid dehydrogenase-like (Nsdhl), mRNA [NM_001009399]                                                                                                  | 30,860 |
| Mef2d     | Rattus norvegicus myocyte enhancer factor 2D (Mef2d), mRNA [NM_030860]                                                                                                                      | 30,849 |
| 0         | Q8R111_MOUSE (Q8R111) Plekha6 protein (Fragment), partial (70%) [TC597504]                                                                                                                  | 30,849 |
| Zcchc24   | Rattus norvegicus zinc finger, CCHC domain containing 24 (Zcchc24), mRNA [NM_001108394]                                                                                                     | 30,840 |
| B3gat1    | Rattus norvegicus beta-1,3-glucuronyltransferase 1 (glucuronosyltransferase P) (B3gat1), mRNA [NM_054003]                                                                                   | 30,828 |
| 0         | Q8IVU8_HUMAN (Q8IVU8) LOC340529 protein (Fragment), partial (54%) [TC642990]                                                                                                                | 30,795 |
| Whsc1     | Rattus norvegicus Wolf-Hirschhorn syndrome candidate 1 (human) (Whsc1), mRNA [NM_001191552]                                                                                                 | 30,794 |
| Pppde1    | Rattus norvegicus PPPDE peptidase domain containing 1 (Pppde1), mRNA [NM_001013873]                                                                                                         | 30,785 |
| Psme3     | Rattus norvegicus proteasome (prosome, macropain) activator subunit 3 (Psme3), mRNA [NM_001011894]                                                                                          | 30,769 |
| Gapdh-ps1 | Rattus norvegicus glyceraldehyde-3-phosphate dehydrogenase, pseudogene 1 (Gapdh-ps1), non-coding RNA [NR_003722]                                                                            | 30,762 |
| LOC688163 | PREDICTED: Rattus norvegicus hypothetical protein LOC688163, transcript variant 2 (LOC688163), mRNA [XM_002724542]                                                                          | 30,760 |
| Sema5b    | Rattus norvegicus sema domain, seven thrombospondin repeats (type 1 and type 1-like), transmembrane domain (TM) and short cytoplasmic domain, (semaphorin) 5B (Sema5b), mRNA [NM_001107091] | 30,751 |
| Zfp278    | Rattus norvegicus zinc finger protein 278, mRNA (cDNA clone IMAGE:7376163), partial cds. [BC098801]                                                                                         | 30,744 |
| Phc3      | Rattus norvegicus polyhomeotic homolog 3 (Drosophila) (Phc3), mRNA [NM_001107662]                                                                                                           | 30,741 |
| Ralb      | Rattus norvegicus v-ral simian leukemia viral oncogene homolog B (ras related; GTP binding protein) (Ralb), mRNA [NM_053821]                                                                | 30,726 |
| Uba1      | Rattus norvegicus ubiquitin-like modifier activating enzyme 1 (Uba1), mRNA [NM_001014080]                                                                                                   | 30,720 |
| C1H6orf35 | Rattus norvegicus chromosome 1 open reading frame, human C6orf35 (C1H6orf35), mRNA [NM_001144860]                                                                                           | 30,705 |
| Sh3gl2    | Endophilin-A1 [Source:UniProtKB/Swiss-Prot;Acc:O35179] [ENSRNOT00000008999]                                                                                                                 | 30,700 |
| 0         | Uncharacterized protein [Source:UniProtKB/TrEMBL;Acc:D3ZSV9] [ENSRNOT00000011770]                                                                                                           | 30,700 |
| Zfp418    | Rattus norvegicus zinc finger protein 418 (Zfp418), mRNA [NM_001191620]                                                                                                                     | 30,691 |
| 0         | Unknown                                                                                                                                                                                     | 30,684 |

|              |                                                                                                                                                                                |               |
|--------------|--------------------------------------------------------------------------------------------------------------------------------------------------------------------------------|---------------|
| LOC680138    | Unknown                                                                                                                                                                        | <b>30,678</b> |
| 0            | Rattus norvegicus similar to 60S RIBOSOMAL PROTEIN L29 (P23) (LOC294697), mRNA [XM_226719]                                                                                     | <b>30,675</b> |
| Rad21        | Rattus norvegicus RAD21 homolog (S. pombe) (Rad21), mRNA [NM_001025701]                                                                                                        | <b>30,668</b> |
| RGD1566073   | Uncharacterized protein [Source:UniProtKB/TrEMBL;Acc:D3ZY63] [ENSRNOT00000034681]                                                                                              | <b>30,644</b> |
| Nfia         | Rattus norvegicus nuclear factor I/A (Nfia), mRNA [NM_012988]                                                                                                                  | <b>30,628</b> |
| Sec14l1      | Rattus norvegicus SEC14-like 1 (S. cerevisiae) (Sec14l1), mRNA [NM_001108309]                                                                                                  | <b>30,562</b> |
| 0            | Calcium/calmodulin-dependent protein kinase type 1G [Source:UniProtKB/Swiss-Prot;Acc:Q7TNJ7] [ENSRNOT00000044161]                                                              | <b>30,552</b> |
| Rab13        | Rattus norvegicus RAB, member of RAS oncogene family-like 3 (Rab13), mRNA [NM_001108319]                                                                                       | <b>30,547</b> |
| LOC100364190 | Similar to contactin associated protein-like 2 isoform a, isoform CRA_bUncharacterized protein [Source:UniProtKB/TrEMBL;Acc:D3ZA73] [ENSRNOT00000008688]                       | <b>30,538</b> |
| Theg         | Rattus norvegicus testicular haploid expressed gene (Theg), mRNA [NM_001013102]                                                                                                | <b>30,523</b> |
| Cpne6        | Rattus norvegicus copine VI (Cpne6), mRNA [NM_001191113]                                                                                                                       | <b>30,519</b> |
| 0            | Unknown                                                                                                                                                                        | <b>30,509</b> |
| Ptbp1        | Rattus norvegicus polypyrimidine tract binding protein 1 (Ptbp1), transcript variant 2, mRNA [NM_022516]                                                                       | <b>30,506</b> |
| Mypop        | Rattus norvegicus Myb-related transcription factor, partner of profilin (Mypop), mRNA [NM_001109139]                                                                           | <b>30,494</b> |
| Npy          | Rattus norvegicus neuropeptide Y (Npy), mRNA [NM_012614]                                                                                                                       | <b>30,480</b> |
| Dpf1         | Rattus norvegicus D4, zinc and double PHD fingers family 1 (Dpf1), mRNA [NM_001105729]                                                                                         | <b>30,446</b> |
| Glul         | Rattus norvegicus glutamate-ammonia ligase (glutamine synthetase) (Glul), mRNA [NM_017073]                                                                                     | <b>30,441</b> |
| 0            | Unknown                                                                                                                                                                        | <b>30,425</b> |
| Shc1         | Rattus norvegicus SHC (Src homology 2 domain containing) transforming protein 1 (Shc1), nuclear gene encoding mitochondrial protein, transcript variant 1, mRNA [NM_001164060] | <b>30,422</b> |
| 0            | Unknown                                                                                                                                                                        | <b>30,403</b> |
| 0            | Unknown                                                                                                                                                                        | <b>30,400</b> |
| Araf         | Rattus norvegicus v-raf murine sarcoma 3611 viral oncogene homolog (Araf), transcript variant 1, mRNA [NM_022532]                                                              | <b>30,391</b> |
| RGD1310351   | Rattus norvegicus similar to RIKEN cDNA 4732418C07 (RGD1310351), mRNA [NM_001106677]                                                                                           | <b>30,391</b> |
| Cyp2d4       | Cytochrome P450 2D18 [Source:UniProtKB/Swiss-Prot;Acc:Q64680] [ENSRNOT00000011880]                                                                                             | <b>30,367</b> |
| Znf609       | Rattus norvegicus zinc finger protein 609 (Znf609), mRNA [NM_001173371]                                                                                                        | <b>30,343</b> |
| Rab2b        | Rattus norvegicus RAB2B, member RAS oncogene family, mRNA (cDNA clone IMAGE:7316063), partial cds. [BC092636]                                                                  | <b>30,342</b> |
| Prkar2b      | Rattus norvegicus protein kinase, cAMP dependent regulatory, type II beta (Prkar2b), mRNA [NM_001030020]                                                                       | <b>30,329</b> |
| Ppapdc2      | Rattus norvegicus phosphatidic acid phosphatase type 2 domain containing 2 (Ppapdc2), mRNA [NM_001034854]                                                                      | <b>30,328</b> |
| Rerg         | PREDICTED: Rattus norvegicus RAS-like, estrogen-regulated, growth-inhibitor (Rerg), mRNA [XM_578417]                                                                           | <b>30,328</b> |
| Foxp1        | Rattus norvegicus forkhead box P1 (Foxp1), mRNA [NM_001034131]                                                                                                                 | <b>30,309</b> |
| Spag1        | Rattus norvegicus sperm associated antigen 1 (Spag1), mRNA [NM_001012116]                                                                                                      | <b>30,304</b> |
| 0            | RVL9282 Wackym-Soares normalized rat vestibular cDNA library Rattus norvegicus cDNA 5', mRNA sequence [DV718665]                                                               | <b>30,267</b> |



|            |                                                                                                                        |               |
|------------|------------------------------------------------------------------------------------------------------------------------|---------------|
| Eps15l1    | Rattus norvegicus epidermal growth factor receptor pathway substrate 15-like 1 (Eps15l1), mRNA [NM_001029921]          | <b>30,253</b> |
| Cfl2       | Rattus norvegicus cofilin 2, muscle (Cfl2), mRNA [NM_001108982]                                                        | <b>30,245</b> |
| Clcn7      | Rattus norvegicus chloride channel 7 (Clcn7), mRNA [NM_031568]                                                         | <b>30,241</b> |
| Osr1       | Rattus norvegicus odd-skipped related 1 (Drosophila) (Osr1), mRNA [NM_001106716]                                       | <b>30,227</b> |
| Bcap31     | Rattus norvegicus B-cell receptor-associated protein 31 (Bcap31), mRNA [NM_001004224]                                  | <b>30,225</b> |
| Kptn       | Rattus norvegicus kaptin (actin binding protein) (Kptn), mRNA [NM_001107457]                                           | <b>30,220</b> |
| Aard       | Rattus norvegicus alanine and arginine rich domain containing protein (Aard), mRNA [NM_145093]                         | <b>30,211</b> |
| 0          | Rattus norvegicus similar to 60S RIBOSOMAL PROTEIN L29 (P23) (LOC290219), mRNA [XM_224186]                             | <b>30,202</b> |
| Zfp275     | Rattus norvegicus zinc finger protein 275 (Zfp275), mRNA [NM_001106343]                                                | <b>30,201</b> |
| Lif        | Rattus norvegicus leukemia inhibitory factor (Lif), mRNA [NM_022196]                                                   | <b>30,200</b> |
| Atg4c      | Rattus norvegicus ATG4 autophagy related 4 homolog C (S. cerevisiae) (Atg4c), mRNA [NM_001107948]                      | <b>30,192</b> |
| Nubp2      | Rattus norvegicus nucleotide binding protein 2 (Nubp2), mRNA [NM_001011891]                                            | <b>30,170</b> |
| Hdgf       | Rattus norvegicus hepatoma-derived growth factor (Hdgf), mRNA [NM_053707]                                              | <b>30,166</b> |
| Rnf38      | Rattus norvegicus ring finger protein 38 (Rnf38), mRNA [NM_134467]                                                     | <b>30,166</b> |
| Tp53       | Rattus norvegicus tumor protein p53 (Tp53), mRNA [NM_030989]                                                           | <b>30,166</b> |
| Slc6a11    | Rattus norvegicus solute carrier family 6 (neurotransmitter transporter, GABA), member 11 (Slc6a11), mRNA [NM_024372]  | <b>30,162</b> |
| RGD1307554 | Rattus norvegicus similar to CG16812-PA (RGD1307554), mRNA [NM_001109664]                                              | <b>30,157</b> |
| Ak1        | Rattus norvegicus adenylate kinase 1 (Ak1), mRNA [NM_024349]                                                           | <b>30,146</b> |
| 0          | Unknown                                                                                                                | <b>30,141</b> |
| Otx2       | Rattus norvegicus orthodenticle homeobox 2 (Otx2), mRNA [NM_001100566]                                                 | <b>30,120</b> |
| Gps2       | Rattus norvegicus G protein pathway suppressor 2 (Gps2), mRNA [NM_001017477]                                           | <b>30,118</b> |
| Gnl3l      | Rattus norvegicus guanine nucleotide binding protein-like 3 (nucleolar)-like (Gnl3l), mRNA [NM_001081958]              | <b>30,107</b> |
| Kcna6      | Rattus norvegicus potassium voltage gated channel, shaker related subfamily, member 6 (Kcna6), mRNA [NM_023954]        | <b>30,105</b> |
| Cflar      | Rattus norvegicus CASP8 and FADD-like apoptosis regulator (Cflar), transcript variant 2, mRNA [NM_057138]              | <b>30,103</b> |
| Dclk2      | Rattus norvegicus doublecortin-like kinase 2 (Dclk2), transcript variant 2, mRNA [NM_001009691]                        | <b>30,098</b> |
| Msn        | Rattus norvegicus moesin (Msn), mRNA [NM_030863]                                                                       | <b>30,087</b> |
| Gclc       | Rattus norvegicus glutamate-cysteine ligase, catalytic subunit (Gclc), mRNA [NM_012815]                                | <b>30,078</b> |
| Stx1b      | Rattus norvegicus syntaxin 1B (Stx1b), mRNA [NM_012700]                                                                | <b>30,051</b> |
| Pde10a     | Rattus norvegicus phosphodiesterase 10A (Pde10a), mRNA [NM_022236]                                                     | <b>30,024</b> |
| Olr1l      | Rattus norvegicus olfactory receptor 1-like (Olr1l), mRNA [NM_001000538]                                               | <b>30,013</b> |
| Pkp1       | Rattus norvegicus plakophilin 1 (Pkp1), mRNA [NM_001107181]                                                            | <b>30,013</b> |
| RGD1564637 | PREDICTED: Rattus norvegicus similar to interferon alpha 8/6 precursor; IFNa8/6 (B6) (RGD1564637), mRNA [XM_001054291] | <b>30,004</b> |
| 0          | Unknown                                                                                                                | <b>30,000</b> |
| Pdlim7     | Rattus norvegicus PDZ and LIM domain 7 (Pdlim7), mRNA [NM_173125]                                                      | <b>30,000</b> |

|            |                                                                                                                                                            |               |
|------------|------------------------------------------------------------------------------------------------------------------------------------------------------------|---------------|
| 0          | Unknown                                                                                                                                                    | <b>29,997</b> |
| Emx2       | Rattus norvegicus empty spiracles homeobox 2 (Emx2), mRNA [NM_001109169]                                                                                   | <b>29,997</b> |
| Sh3kbp1    | Rattus norvegicus SH3-domain kinase binding protein 1 (Sh3kbp1), mRNA [NM_053360]                                                                          | <b>29,987</b> |
| RGD1561849 | Rattus norvegicus similar to RIKEN cDNA 3110035E14 (RGD1561849), mRNA [NM_001109260]                                                                       | <b>29,985</b> |
| Sema3c     | Rattus norvegicus sema domain, immunoglobulin domain (Ig), short basic domain, secreted, (semaphorin) 3C (Sema3c), mRNA [NM_001106578]                     | <b>29,972</b> |
| Faim2      | Rattus norvegicus Fas apoptotic inhibitory molecule 2 (Faim2), mRNA [NM_144756]                                                                            | <b>29,951</b> |
| LOC685233  | PREDICTED: Rattus norvegicus hypothetical protein LOC685233 (LOC685233), mRNA [XM_001062937]                                                               | <b>29,936</b> |
| Cacna1g    | Rattus norvegicus calcium channel, voltage-dependent, T type, alpha 1G subunit (Cacna1g), mRNA [NM_031601]                                                 | <b>29,934</b> |
| 0          | Q40555_TOBAC (Q40555) Peroxidase, partial (5%) [TC599198]                                                                                                  | <b>29,910</b> |
| RGD1560902 | PREDICTED: Rattus norvegicus similar to Cofilin, non-muscle isoform (Cofilin-1) (RGD1560902), mRNA [XM_002724509]                                          | <b>29,907</b> |
| Znf689     | Rattus norvegicus zinc finger protein 689 (Znf689), mRNA [NM_173330]                                                                                       | <b>29,904</b> |
| 0          | Q5DBE9_SCHJA (Q5DBE9) SJCHGC01974 protein, partial (22%) [TC633657]                                                                                        | <b>29,894</b> |
| LOC290595  | Rattus norvegicus hypothetical gene supported by AF152002 (LOC290595), mRNA [NM_001106063]                                                                 | <b>29,891</b> |
| Camta2     | Rattus norvegicus calmodulin binding transcription activator 2 (Camta2), mRNA [NM_001105801]                                                               | <b>29,855</b> |
| LOC683460  | PREDICTED: Rattus norvegicus hypothetical protein LOC683460, transcript variant 2 (LOC683460), mRNA [XM_001065403]                                         | <b>29,837</b> |
| RGD1559747 | Rattus norvegicus similar to Zinc finger and SCAN domain containing protein 2 (Zinc finger protein 29) (RGD1559747), non-coding RNA [NR_027235]            | <b>29,836</b> |
| Tpd52      | Rattus norvegicus tumor protein D52 (Tpd52), mRNA [NM_001106421]                                                                                           | <b>29,821</b> |
| Rnf181     | Rattus norvegicus ring finger protein 181 (Rnf181), mRNA [NM_001007647]                                                                                    | <b>29,798</b> |
| Tnfsf12    | Rattus norvegicus tumor necrosis factor ligand superfamily member 12 (Tnfsf12), mRNA [NM_001001513]                                                        | <b>29,793</b> |
| LOC687381  | PREDICTED: Rattus norvegicus similar to COX10 homolog, cytochrome c oxidase assembly protein, heme A: farnesyltransferase (LOC687381), mRNA [XM_001077717] | <b>29,788</b> |
| Galnt11    | Rattus norvegicus UDP-N-acetyl-alpha-D-galactosamine:polypeptide N-acetylgalactosaminyltransferase-like 1 (Galnt11), mRNA [NM_001100863]                   | <b>29,786</b> |
| 0          | Rattus norvegicus TL0AEA65YB02 mRNA sequence. [FQ232612]                                                                                                   | <b>29,781</b> |
| Nptxr      | Rattus norvegicus neuronal pentraxin receptor (Nptxr), mRNA [NM_030841]                                                                                    | <b>29,781</b> |
| Pcyox1l    | Rattus norvegicus prenylcysteine oxidase 1 like (Pcyox1l), mRNA [NM_001134542]                                                                             | <b>29,765</b> |
| Cyp2s1     | Rattus norvegicus cytochrome P450, family 2, subfamily s, polypeptide 1 (Cyp2s1), mRNA [NM_001107495]                                                      | <b>29,756</b> |
| Naf1       | Rattus norvegicus nuclear assembly factor 1 homolog (S. cerevisiae) (Naf1), mRNA [NM_001024772]                                                            | <b>29,752</b> |
| Irak1      | Rattus norvegicus interleukin-1 receptor-associated kinase 1 (Irak1), mRNA [NM_001127555]                                                                  | <b>29,743</b> |
| Zfp316     | Rattus norvegicus zinc finger protein 316 (Zfp316), mRNA [NM_001107121]                                                                                    | <b>29,742</b> |
| Fnbp1      | Rattus norvegicus formin binding protein 1 (Fnbp1), mRNA [NM_138914]                                                                                       | <b>29,734</b> |
| H6pd       | Rattus norvegicus hexose-6-phosphate dehydrogenase (glucose 1-dehydrogenase) (H6pd), mRNA [NM_001106698]                                                   | <b>29,724</b> |
| Zfp469     | Rattus norvegicus zinc finger protein 469 (Zfp469), mRNA [NM_001107123]                                                                                    | <b>29,720</b> |
| 0          | Rattus norvegicus similar to myosin regulatory light chain-like (LOC316125), mRNA [XM_236776]                                                              | <b>29,697</b> |

|           |                                                                                                                                      |               |
|-----------|--------------------------------------------------------------------------------------------------------------------------------------|---------------|
| Pex19     | Rattus norvegicus peroxisomal biogenesis factor 19 (Pex19), transcript variant 1, mRNA [NM_001107375]                                | <b>29,691</b> |
| Snapc2    | Rattus norvegicus small nuclear RNA activating complex, polypeptide 2 (Snapc2), mRNA [NM_001013121]                                  | <b>29,685</b> |
| Pard3b    | Rattus norvegicus par-3 partitioning defective 3 homolog B (C. elegans) (Pard3b), mRNA [NM_001191808]                                | <b>29,680</b> |
| LOC498350 | Rattus norvegicus similar to testicular haploid expressed gene product isoform 2 (LOC498350), mRNA [NM_001017498]                    | <b>29,669</b> |
| Tbx19     | Rattus norvegicus T-box 19 (Tbx19), mRNA [NM_001107193]                                                                              | <b>29,667</b> |
| Runx1t1   | Rattus norvegicus runt-related transcription factor 1; translocated to, 1 (cyclin D-related) (Runx1t1), mRNA [NM_001108657]          | <b>29,661</b> |
| 0         | Unknown                                                                                                                              | <b>29,661</b> |
| Dnajc12   | Rattus norvegicus DnaJ (Hsp40) homolog, subfamily C, member 12 (Dnajc12), mRNA [NM_001034032]                                        | <b>29,661</b> |
| Srebf2    | Rattus norvegicus sterol regulatory element binding transcription factor 2 (Srebf2), mRNA [NM_001033694]                             | <b>29,653</b> |
| Cxcl12    | Rattus norvegicus chemokine (C-X-C motif) ligand 12 (stromal cell-derived factor 1) (Cxcl12), transcript variant 1, mRNA [NM_022177] | <b>29,643</b> |
| Syvn1     | Rattus norvegicus synovial apoptosis inhibitor 1, synoviolin (Syvn1), mRNA [NM_001100739]                                            | <b>29,638</b> |
| 0         | Unknown                                                                                                                              | <b>29,638</b> |
| Ccdc127   | Rattus norvegicus coiled-coil domain containing 127 (Ccdc127), mRNA [NM_198766]                                                      | <b>29,637</b> |
| Arhgef18  | Rattus norvegicus rho/rac guanine nucleotide exchange factor (GEF) 18 (Arhgef18), mRNA [NM_001107115]                                | <b>29,636</b> |
| Arhgef7   | Rattus norvegicus Rho guanine nucleotide exchange factor (GEF7) (Arhgef7), transcript variant 1, mRNA [NM_001113521]                 | <b>29,614</b> |
| Nfib      | Rattus norvegicus nuclear factor I/B (Nfib), mRNA [NM_031566]                                                                        | <b>29,606</b> |
| Erlin1    | Rattus norvegicus ER lipid raft associated 1 (Erlin1), mRNA [NM_001106353]                                                           | <b>29,603</b> |
| 0         | Rattus norvegicus similar to 60S RIBOSOMAL PROTEIN L29 (P23) (LOC295470), mRNA [XM_227709]                                           | <b>29,599</b> |
| Mapre1    | Rattus norvegicus microtubule-associated protein, RP/EB family, member 1 (Mapre1), mRNA [NM_138509]                                  | <b>29,588</b> |
| Scn2a1    | Rattus norvegicus sodium channel, voltage-gated, type II, alpha 1 (Scn2a1), mRNA [NM_012647]                                         | <b>29,586</b> |
| 0         | Unknown                                                                                                                              | <b>29,579</b> |
| Wipf1     | Rattus norvegicus WAS/WASL interacting protein family, member 1 (Wipf1), mRNA [NM_057192]                                            | <b>29,577</b> |
| Xpnpep3   | Rattus norvegicus X-prolyl aminopeptidase (aminopeptidase P) 3, putative (Xpnpep3), mRNA [NM_001130582]                              | <b>29,568</b> |
| LOC501618 | Rattus norvegicus LRRGT00179 (LOC501618), mRNA [NM_001047970]                                                                        | <b>29,564</b> |
| Pcdhb20   | Rattus norvegicus protocadherin beta 20 (Pcdhb20), mRNA [NM_001109395]                                                               | <b>29,548</b> |
| 40057     | Rattus norvegicus septin 9 (Sept9), transcript variant 2, mRNA [NM_176856]                                                           | <b>29,548</b> |
| Csnk1e    | Rattus norvegicus casein kinase 1, epsilon (Csnk1e), mRNA [NM_031617]                                                                | <b>29,545</b> |
| Nedd4l    | Rattus norvegicus neural precursor cell expressed, developmentally down-regulated 4-like (Nedd4l), mRNA [NM_001008300]               | <b>29,538</b> |
| 0         | Unknown                                                                                                                              | <b>29,515</b> |
| LOC680692 | PREDICTED: Rattus norvegicus similar to Golgi phosphoprotein 2 (Golgi membrane protein GP73) (LOC680692), mRNA [XM_002725221]        | <b>29,514</b> |
| 0         | Unknown                                                                                                                              | <b>29,508</b> |
| Carhsp1   | Rattus norvegicus calcium regulated heat stable protein 1 (Carhsp1), mRNA [NM_152790]                                                | <b>29,496</b> |
| Slc31a1   | Rattus norvegicus solute carrier family 31 (copper transporters), member 1 (Slc31a1), mRNA [NM_133600]                               | <b>29,491</b> |
| 0         | Unknown                                                                                                                              | <b>29,487</b> |

|            |                                                                                                                                 |               |
|------------|---------------------------------------------------------------------------------------------------------------------------------|---------------|
| 0          | Unknown                                                                                                                         | <b>29,460</b> |
| Dnajb9     | Rattus norvegicus DnaJ (Hsp40) homolog, subfamily B, member 9 (Dnajb9), mRNA [NM_012699]                                        | <b>29,454</b> |
| Apc        | Rattus norvegicus adenomatous polyposis coli (Apc), mRNA [NM_012499]                                                            | <b>29,452</b> |
| Rims1      | Rattus norvegicus regulating synaptic membrane exocytosis 1 (Rims1), mRNA [NM_052829]                                           | <b>29,441</b> |
| Tmem229b   | Rattus norvegicus transmembrane protein 229B (Tmem229b), mRNA [NM_001109359]                                                    | <b>29,424</b> |
| Bmp4       | Rattus norvegicus bone morphogenetic protein 4 (Bmp4), mRNA [NM_012827]                                                         | <b>29,411</b> |
| Mxi1       | Rattus norvegicus MAX interactor 1 (Mxi1), mRNA [NM_013160]                                                                     | <b>29,409</b> |
| Mtus1      | Rattus norvegicus mitochondrial tumor suppressor 1 (Mtus1), nuclear gene encoding mitochondrial protein, mRNA [NM_178093]       | <b>29,398</b> |
| LOC689103  | Uncharacterized protein [Source:UniProtKB/TrEMBL;Acc:D3ZX44] [ENSRNOT00000025346]                                               | <b>29,391</b> |
| LOC302495  | Rattus norvegicus hypothetical LOC302495 (LOC302495), mRNA [NM_001106950]                                                       | <b>29,383</b> |
| Anxa11     | Rattus norvegicus annexin A11 (Anxa11), mRNA [NM_001011918]                                                                     | <b>29,380</b> |
| LOC500013  | PREDICTED: Rattus norvegicus similar to sterile alpha motif domain containing 9-like (LOC500013), miscRNA [XR_005677]           | <b>29,365</b> |
| 0          | Unknown                                                                                                                         | <b>29,360</b> |
| Ntsr1      | Rattus norvegicus neurotensin receptor 1 (Ntsr1), mRNA [NM_001108967]                                                           | <b>29,359</b> |
| Popdc2     | Rattus norvegicus popeye domain containing 2 (Popdc2), mRNA [NM_199113]                                                         | <b>29,353</b> |
| Atp2b4     | Rattus norvegicus ATPase, Ca <sup>++</sup> transporting, plasma membrane 4 (Atp2b4), mRNA [NM_001005871]                        | <b>29,346</b> |
| Sos1       | Rattus norvegicus Son of sevenless homolog 1 (Drosophila) (Sos1), mRNA [NM_001100716]                                           | <b>29,322</b> |
| Usp31      | Rattus norvegicus ubiquitin specific peptidase 31 (Usp31), mRNA [NM_001107548]                                                  | <b>29,303</b> |
| Sigmar1    | Rattus norvegicus sigma non-opioid intracellular receptor 1 (Sigmar1), mRNA [NM_030996]                                         | <b>29,303</b> |
| Fam20b     | Rattus norvegicus family with sequence similarity 20, member B (Fam20b), mRNA [NM_001107187]                                    | <b>29,299</b> |
| Nudt7      | Rattus norvegicus nudix (nucleoside diphosphate linked moiety X)-type motif 7 (Nudt7), mRNA [NM_001108450]                      | <b>29,279</b> |
| Il10rb     | Rattus norvegicus interleukin 10 receptor, beta (Il10rb), mRNA [NM_001107111]                                                   | <b>29,257</b> |
| Srpr       | Rattus norvegicus signal recognition particle receptor ('docking protein') (Srpr), mRNA [NM_001034150]                          | <b>29,241</b> |
| Cacna1h    | Rattus norvegicus calcium channel, voltage-dependent, T type, alpha 1H subunit (Cacna1h), mRNA [NM_153814]                      | <b>29,237</b> |
| 0          | PREDICTED: Rattus norvegicus similar to Myosin light chain 1 slow a (RGD1560334), mRNA [XM_228900]                              | <b>29,224</b> |
| Tnfrsf21   | Rattus norvegicus tumor necrosis factor receptor superfamily, member 21 (Tnfrsf21), mRNA [NM_001108207]                         | <b>29,215</b> |
| Ccdc94     | Rattus norvegicus coiled-coil domain containing 94 (Ccdc94), mRNA [NM_001109673]                                                | <b>29,213</b> |
| Dbn1       | Rattus norvegicus drebrin 1 (Dbn1), mRNA [NM_031024]                                                                            | <b>29,211</b> |
| Tmem25     | Rattus norvegicus transmembrane protein 25 (Tmem25), mRNA [NM_001109528]                                                        | <b>29,205</b> |
| Rab6b      | Rattus norvegicus RAB6B, member RAS oncogene family (Rab6b), mRNA [NM_001108775]                                                | <b>29,181</b> |
| RGD1565959 | Rattus norvegicus RGD1565959 (RGD1565959), mRNA [NM_001106886]                                                                  | <b>29,177</b> |
| Cdh6       | Rattus norvegicus cadherin 6 (Cdh6), mRNA [NM_012927]                                                                           | <b>29,176</b> |
| Npb        | Rattus norvegicus neuropeptide B (Npb), mRNA [NM_153293]                                                                        | <b>29,171</b> |
| Pip5k1c    | Rattus norvegicus phosphatidylinositol-4-phosphate 5-kinase, type I, gamma (Pip5k1c), transcript variant b, mRNA [NM_001033970] | <b>29,169</b> |

|            |                                                                                                                               |               |
|------------|-------------------------------------------------------------------------------------------------------------------------------|---------------|
| Gpr4       | Rattus norvegicus G protein-coupled receptor 4 (Gpr4), mRNA [NM_001025680]                                                    | <b>29,114</b> |
| Cadm1      | Rattus norvegicus cell adhesion molecule 1 (Cadm1), mRNA [NM_001012201]                                                       | <b>29,111</b> |
| Treh       | Rattus norvegicus trehalase (brush-border membrane glycoprotein) (Treh), mRNA [NM_001136141]                                  | <b>29,108</b> |
| Tnr        | Rattus norvegicus tenascin R (Tnr), mRNA [NM_013045]                                                                          | <b>29,106</b> |
| 0          | Unknown                                                                                                                       | <b>29,105</b> |
| 0          | Uncharacterized protein [Source:UniProtKB/TrEMBL;Acc:D3ZEV1] [ENSRNOT00000041121]                                             | <b>29,097</b> |
| Tp53       | Rattus norvegicus tumor protein p53 (Tp53), mRNA [NM_030989]                                                                  | <b>29,084</b> |
| Tgfb3      | Rattus norvegicus transforming growth factor, beta 3 (Tgfb3), mRNA [NM_013174]                                                | <b>29,081</b> |
| Zcchc11    | Rattus norvegicus zinc finger, CCHC domain containing 11 (Zcchc11), mRNA [NM_001107953]                                       | <b>29,072</b> |
| Csnk1e     | Rattus norvegicus casein kinase 1, epsilon (Csnk1e), mRNA [NM_031617]                                                         | <b>29,057</b> |
| 0          | Unknown                                                                                                                       | <b>29,054</b> |
| 0          | Uncharacterized protein [Source:UniProtKB/TrEMBL;Acc:D3ZGV8] [ENSRNOT00000004410]                                             | <b>29,045</b> |
| Itpril2    | Rattus norvegicus inositol 1,4,5-triphosphate receptor interacting protein-like 2 (Itpril2), mRNA [NM_001127303]              | <b>29,039</b> |
| Sssca1     | Rattus norvegicus Sjogren's syndrome/scleroderma autoantigen 1 homolog (human) (Sssca1), mRNA [NM_001109537]                  | <b>29,035</b> |
| Sap30bp    | Rattus norvegicus SAP30 binding protein (Sap30bp), mRNA [NM_001108305]                                                        | <b>29,025</b> |
| Pgrmc2     | Rattus norvegicus progesterone receptor membrane component 2 (Pgrmc2), mRNA [NM_001008374]                                    | <b>29,021</b> |
| Lsm16      | PREDICTED: Rattus norvegicus LSM16 homolog (EDC3, <i>S. cerevisiae</i> ), transcript variant 1 (Lsm16), mRNA [XM_001072079]   | <b>29,021</b> |
| Bmp15      | Rattus norvegicus bone morphogenetic protein 15 (Bmp15), mRNA [NM_021670]                                                     | <b>29,015</b> |
| Plekhh1    | Rattus norvegicus pleckstrin homology domain containing, family H (with MyTH4 domain) member 1 (Plekhh1), mRNA [NM_001108036] | <b>29,014</b> |
| 0          | NRX3A_RAT (Q07310) Neurexin-3-alpha precursor (Neurexin III-alpha), complete [TC573962]                                       | <b>29,002</b> |
| Zdhhc3     | Rattus norvegicus zinc finger, DHHC-type containing 3 (Zdhhc3), mRNA [NM_001039014]                                           | <b>28,990</b> |
| Lgals5     | Rattus norvegicus lectin, galactose binding, soluble 5 (Lgals5), mRNA [NM_012976]                                             | <b>28,990</b> |
| 0          | Unknown                                                                                                                       | <b>28,983</b> |
| LOC687483  | PREDICTED: Rattus norvegicus hypothetical protein LOC687483 (LOC687483), mRNA [XM_001078767]                                  | <b>28,981</b> |
| Gabbr1     | Rattus norvegicus gamma-aminobutyric acid (GABA) B receptor 1 (Gabbr1), mRNA [NM_031028]                                      | <b>28,977</b> |
| Scarb1     | Rattus norvegicus scavenger receptor class B, member 1 (Scarb1), mRNA [NM_031541]                                             | <b>28,963</b> |
| Fam184b    | Uncharacterized protein [Source:UniProtKB/TrEMBL;Acc:D3ZTZ0] [ENSRNOT00000004923]                                             | <b>28,962</b> |
| RGD1561962 | Rattus norvegicus TL0ABA17YG18 mRNA sequence. [FQ211110]                                                                      | <b>28,957</b> |
| LOC689656  | Uncharacterized protein [Source:UniProtKB/TrEMBL;Acc:D3ZUC4] [ENSRNOT000000039322]                                            | <b>28,954</b> |
| Kcnq3      | Rattus norvegicus potassium voltage-gated channel, KQT-like subfamily, member 3 (Kcnq3), mRNA [NM_031597]                     | <b>28,921</b> |
| Ocel1      | Rattus norvegicus occludin/ELL domain containing 1 (Ocel1), mRNA [NM_001106065]                                               | <b>28,917</b> |
| Tex10      | Rattus norvegicus testis expressed 10 (Tex10), mRNA [NM_001106653]                                                            | <b>28,902</b> |
| Ddx17      | Rattus norvegicus DEAD (Asp-Glu-Ala-Asp) box polypeptide 17 (Ddx17), mRNA [NM_001015018]                                      | <b>28,902</b> |
| Kcnk3      | Rattus norvegicus potassium channel, subfamily K, member 3 (Kcnk3), mRNA [NM_033376]                                          | <b>28,890</b> |

|            |                                                                                                                                  |        |
|------------|----------------------------------------------------------------------------------------------------------------------------------|--------|
| Mbtps2     | Rattus norvegicus membrane-bound transcription factor peptidase, site 2 (Mbtps2), mRNA [NM_001035007]                            | 28,878 |
| Tgfa       | Rattus norvegicus transforming growth factor alpha (Tgfa), mRNA [NM_012671]                                                      | 28,856 |
| Glis2      | Rattus norvegicus GLIS family zinc finger 2 (Glis2), mRNA [NM_001106978]                                                         | 28,840 |
| Gabpb1     | Rattus norvegicus GA binding protein transcription factor, beta subunit 1 (Gabpb1), mRNA [NM_001039036]                          | 28,824 |
| Znf579     | Rattus norvegicus zinc finger protein 579 (Znf579), mRNA [NM_001126276]                                                          | 28,807 |
| Fbxo16     | Rattus norvegicus F-box protein 16 (Fbxo16), mRNA [NM_001013132]                                                                 | 28,805 |
| 0          | Rattus norvegicus similar to splicing-related factor RNPS1 (LOC312994), mRNA [XM_232688]                                         | 28,801 |
| Otud7b     | Rattus norvegicus OTU domain containing 7B (Otud7b), mRNA [NM_001107697]                                                         | 28,800 |
| Tiam1      | Rattus norvegicus T-cell lymphoma invasion and metastasis 1 (Tiam1), mRNA [NM_001100558]                                         | 28,791 |
| 0          | Rattus norvegicus similar to peroxiredoxin 6 (LOC287416), mRNA [XM_220591]                                                       | 28,783 |
| 0          | Unknown                                                                                                                          | 28,783 |
| 0          | Uncharacterized protein [Source:UniProtKB/TrEMBL;Acc:D3ZDV6] [ENSRNOT00000011793]                                                | 28,781 |
| RGD1560286 | Rattus norvegicus similar to DNA segment, Chr 4, ERATO Doi 22, expressed (RGD1560286), transcript variant 1, mRNA [NM_001114599] | 28,772 |
| Lims2      | Rattus norvegicus LIM and senescent cell antigen like domains 2 (Lims2), mRNA [NM_001012163]                                     | 28,769 |
| 0          | Unknown                                                                                                                          | 28,761 |
| Abcc1      | Rattus norvegicus ATP-binding cassette, subfamily C (CFTR/MRP), member 1 (Abcc1), mRNA [NM_022281]                               | 28,753 |
| RGD1565236 | Rattus norvegicus similar to transcription factor (RGD1565236), mRNA [NM_001109261]                                              | 28,750 |
| Gbp2       | Rattus norvegicus guanylate binding protein 2 (Gbp2), mRNA [NM_133624]                                                           | 28,745 |
| 0          | Uncharacterized protein [Source:UniProtKB/TrEMBL;Acc:D3ZJB6] [ENSRNOT00000040584]                                                | 28,739 |
| Cryab      | Rattus norvegicus crystallin, alpha B (Cryab), mRNA [NM_012935]                                                                  | 28,736 |
| 0          | Unknown                                                                                                                          | 28,723 |
| Neurod6    | Rattus norvegicus neurogenic differentiation 6 (Neurod6), mRNA [NM_001109237]                                                    | 28,716 |
| Mxd1       | Rattus norvegicus max dimerization protein 1 (Mxd1), mRNA [NM_001100749]                                                         | 28,712 |
| Rmnd5a     | PREDICTED: Rattus norvegicus required for meiotic nuclear division 5 homolog A (S. cerevisiae) (Rmnd5a), mRNA [XM_002726419]     | 28,692 |
| Adprh1     | Rattus norvegicus ADP-ribosylhydrolase like 1 (Adprh1), mRNA [NM_001013054]                                                      | 28,687 |
| Clcn4-2    | Rattus norvegicus chloride channel 4-2 (Clcn4-2), mRNA [NM_022198]                                                               | 28,685 |
| Ttc7b      | Rattus norvegicus tetratricopeptide repeat domain 7B (Ttc7b), mRNA [NM_001108719]                                                | 28,683 |
| Pcyt1a     | Rattus norvegicus phosphate cytidyltransferase 1, choline, alpha (Pcyt1a), mRNA [NM_078622]                                      | 28,670 |
| Tnip1      | Rattus norvegicus TNFAIP3 interacting protein 1 (Tnip1), mRNA [NM_001108826]                                                     | 28,646 |
| Dmwd       | PREDICTED: Rattus norvegicus dystrophia myotonica, WD repeat containing (Dmwd), mRNA [XM_002725588]                              | 28,638 |
| Mxra7      | PREDICTED: Rattus norvegicus matrix-remodelling associated 7 (Mxra7), mRNA [XM_002724653]                                        | 28,637 |
| Cabin1     | Rattus norvegicus calcineurin binding protein 1 (Cabin1), mRNA [NM_053575]                                                       | 28,634 |
| Mnt        | Rattus norvegicus max binding protein (Mnt), mRNA [NM_001105807]                                                                 | 28,632 |
| Gast       | Rattus norvegicus gastrin (Gast), mRNA [NM_012849]                                                                               | 28,631 |

|            |                                                                                                                                                  |               |
|------------|--------------------------------------------------------------------------------------------------------------------------------------------------|---------------|
| Shank3     | Rattus norvegicus SH3 and multiple ankyrin repeat domains 3 (Shank3), mRNA [NM_021676]                                                           | <b>28,628</b> |
| 0          | Rattus norvegicus TL0ADA41YI21 mRNA sequence. [FQ220826]                                                                                         | <b>28,626</b> |
| 0          | Q4RY53_TETNG (Q4RY53) Chromosome 3 SCAF14978, whole genome shotgun sequence. (Fragment), partial (3%) [TC596344]                                 | <b>28,611</b> |
| Rnf14      | Rattus norvegicus ring finger protein 14 (Rnf14), mRNA [NM_001034995]                                                                            | <b>28,611</b> |
| Nf1        | Rattus norvegicus neurofibromin 1 (Nf1), mRNA [NM_012609]                                                                                        | <b>28,598</b> |
| Scamp5     | Rattus norvegicus secretory carrier membrane protein 5 (Scamp5), mRNA [NM_031726]                                                                | <b>28,598</b> |
| Tp53i11    | Rattus norvegicus tumor protein p53 inducible protein 11 (Tp53i11), mRNA [NM_001107749]                                                          | <b>28,591</b> |
| Rab1b      | Rattus norvegicus RAB1B, member RAS oncogene family (Rab1b), mRNA [NM_001109979]                                                                 | <b>28,590</b> |
| Naga       | Rattus norvegicus N-acetyl galactosaminidase, alpha (Naga), mRNA [NM_001012120]                                                                  | <b>28,589</b> |
| Hsf2       | Rattus norvegicus heat shock transcription factor 2 (Hsf2), mRNA [NM_031694]                                                                     | <b>28,560</b> |
| 0          | RCG55642Uncharacterized protein [Source:UniProtKB/TrEMBL;Acc:D4AB34] [ENSRNOT00000051810]                                                        | <b>28,550</b> |
| Ndufb4     | Rattus norvegicus NADH dehydrogenase (ubiquinone) 1 beta subcomplex 4 (Ndufb4), nuclear gene encoding mitochondrial protein, mRNA [NM_001037338] | <b>28,547</b> |
| 0          | PREDICTED: Rattus norvegicus hypothetical protein LOC100364461 (LOC100364461), mRNA [XM_002726605]                                               | <b>28,545</b> |
| Scai       | PREDICTED: Rattus norvegicus similar to Protein C9orf126 homolog (LOC690538), mRNA [XM_001074743]                                                | <b>28,540</b> |
| RGD1305572 | Rattus norvegicus similar to hypothetical protein MGC30618 (RGD1305572), mRNA [NM_001024970]                                                     | <b>28,540</b> |
| Snai1      | Rattus norvegicus snail homolog 1 (Drosophila) (Snai1), mRNA [NM_053805]                                                                         | <b>28,531</b> |
| Casp2      | Rattus norvegicus caspase 2 (Casp2), mRNA [NM_022522]                                                                                            | <b>28,490</b> |
| Gpr155     | Rattus norvegicus G protein-coupled receptor 155 (Gpr155), mRNA [NM_001107811]                                                                   | <b>28,484</b> |
| Bhlhe41    | PREDICTED: Rattus norvegicus basic helix-loop-helix family, member e41 (Bhlhe41), mRNA [XM_002729454]                                            | <b>28,479</b> |
| Atp6v0c    | Rattus norvegicus ATPase, H <sup>+</sup> transporting, lysosomal V0 subunit C (Atp6v0c), mRNA [NM_130823]                                        | <b>28,444</b> |
| Perld1     | Rattus norvegicus per1-like domain containing 1 (Perld1), mRNA [NM_001143895]                                                                    | <b>28,443</b> |
| 0          | Unknown                                                                                                                                          | <b>28,440</b> |
| Wdfy3      | Rattus norvegicus WD repeat and FYVE domain containing 3 (Wdfy3), mRNA [NM_001170551]                                                            | <b>28,433</b> |
| Ncoa3      | PREDICTED: Rattus norvegicus nuclear receptor coactivator 3 (Ncoa3), mRNA [XM_215947]                                                            | <b>28,428</b> |
| Tstd2      | Rattus norvegicus thiosulfate sulfurtransferase (rhodanese)-like domain containing 2 (Tstd2), mRNA [NM_001108663]                                | <b>28,425</b> |
| Gcap14     | PREDICTED: Rattus norvegicus granule cell antiserum positive 14 (Gcap14), mRNA [XM_224672]                                                       | <b>28,422</b> |
| 0          | PREDICTED: Rattus norvegicus ubiquitination factor E4B (Ube4b), mRNA [XM_233679]                                                                 | <b>28,418</b> |
| 0          | Unknown                                                                                                                                          | <b>28,416</b> |
| Napa       | Rattus norvegicus N-ethylmaleimide-sensitive factor attachment protein, alpha (Napa), mRNA [NM_080585]                                           | <b>28,391</b> |
| Clec16a    | PREDICTED: Rattus norvegicus C-type lectin domain family 16, member A (Clec16a), mRNA [XM_213209]                                                | <b>28,386</b> |
| 0          | Q7TQM0_MOUSE (Q7TQM0) Fbxo10 protein (Fragment), partial (7%) [TC646406]                                                                         | <b>28,383</b> |
| Sumo3      | Rattus norvegicus SMT3 suppressor of mif two 3 homolog 3 (S. cerevisiae) (Sumo3), mRNA [NM_001024295]                                            | <b>28,382</b> |
| Scara3     | Rattus norvegicus scavenger receptor class A, member 3 (Scara3), mRNA [NM_001108870]                                                             | <b>28,377</b> |

|            |                                                                                                                                                                    |               |
|------------|--------------------------------------------------------------------------------------------------------------------------------------------------------------------|---------------|
| Tnk2       | Rattus norvegicus tyrosine kinase, non-receptor, 2 (Tnk2), mRNA [NM_001008336]                                                                                     | <b>28,377</b> |
| LOC680222  | LOC680222 protein [Source:UniProtKB/TrEMBL;Acc:B2GNF2] [ENSRNOT00000047256]                                                                                        | <b>28,376</b> |
| Dchs1      | Rattus norvegicus dachsous 1 (Drosophila) (Dchs1), mRNA [NM_001107544]                                                                                             | <b>28,376</b> |
| Smarcd1    | Rattus norvegicus SWI/SNF related, matrix associated, actin dependent regulator of chromatin, subfamily d, member 1 (Smarcd1), mRNA [NM_001108752]                 | <b>28,355</b> |
| 0          | Unknown                                                                                                                                                            | <b>28,334</b> |
| St3gal2    | Rattus norvegicus ST3 beta-galactoside alpha-2,3-sialyltransferase 2 (St3gal2), mRNA [NM_031695]                                                                   | <b>28,324</b> |
| Scarf2     | Rattus norvegicus scavenger receptor class F, member 2 (Scarf2), mRNA [NM_001105864]                                                                               | <b>28,322</b> |
| Cnpy3      | Rattus norvegicus canopy 3 homolog (zebrafish) (Cnpy3), mRNA [NM_001134710]                                                                                        | <b>28,318</b> |
| Xkr8       | Rattus norvegicus XK, Kell blood group complex subunit-related family, member 8 (Xkr8), mRNA [NM_001012099]                                                        | <b>28,303</b> |
| Sspn       | Rattus norvegicus sarcospan (Sspn), mRNA [NM_001109255]                                                                                                            | <b>28,293</b> |
| Afmid      | Rattus norvegicus arylformamidase (Afmid), mRNA [NM_001111366]                                                                                                     | <b>28,285</b> |
| Golga1     | Rattus norvegicus golgi autoantigen, golgin subfamily a, 1 (Golga1), mRNA [NM_001107842]                                                                           | <b>28,265</b> |
| Cpsf2      | Rattus norvegicus cleavage and polyadenylation specific factor 2 (Cpsf2), mRNA [NM_001106753]                                                                      | <b>28,260</b> |
| LOC680643  | PREDICTED: Rattus norvegicus similar to MIC2 like 1 (LOC680643), mRNA [XM_001058120]                                                                               | <b>28,236</b> |
| Prl6a1     | Rattus norvegicus prolactin family 6, subfamily a, member 1 (Prl6a1), mRNA [NM_022176]                                                                             | <b>28,220</b> |
| Slc35f2    | Rattus norvegicus solute carrier family 35, member F2 (Slc35f2), mRNA [NM_001106822]                                                                               | <b>28,185</b> |
| LOC689158  | PREDICTED: Rattus norvegicus similar to 60S ribosomal protein L29 (LOC689158), mRNA [XM_002727076]                                                                 | <b>28,184</b> |
| 0          | Solute carrier family 39 (Zinc transporter), member 10 (Predicted), isoform CRA_aUncharacterized protein [Source:UniProtKB/TrEMBL;Acc:D4A517] [ENSRNOT00000016262] | <b>28,180</b> |
| S100a3     | Rattus norvegicus S100 calcium binding protein A3 (S100a3), mRNA [NM_053681]                                                                                       | <b>28,178</b> |
| Baalc      | Rattus norvegicus brain and acute leukemia, cytoplasmic (Baalc), mRNA [NM_144762]                                                                                  | <b>28,173</b> |
| Cyp1b1     | Rattus norvegicus cytochrome P450, family 1, subfamily b, polypeptide 1 (Cyp1b1), mRNA [NM_012940]                                                                 | <b>28,167</b> |
| Reep3      | Rattus norvegicus receptor accessory protein 3 (Reep3), mRNA [NM_001106386]                                                                                        | <b>28,165</b> |
| Fkbp9      | Rattus norvegicus FK506 binding protein 9 (Fkbp9), mRNA [NM_001007646]                                                                                             | <b>28,163</b> |
| Npas2      | Rattus norvegicus neuronal PAS domain protein 2 (Npas2), mRNA [NM_001108214]                                                                                       | <b>28,159</b> |
| 0          | Uncharacterized protein [Source:UniProtKB/TrEMBL;Acc:D3Z8T0] [ENSRNOT00000041537]                                                                                  | <b>28,154</b> |
| Slc24a2    | Rattus norvegicus solute carrier family 24 (sodium/potassium/calcium exchanger), member 2 (Slc24a2), mRNA [NM_031743]                                              | <b>28,153</b> |
| 0          | Unknown                                                                                                                                                            | <b>28,151</b> |
| Cdc42se1   | Rattus norvegicus CDC42 small effector 1 (Cdc42se1), mRNA [NM_001039044]                                                                                           | <b>28,149</b> |
| 0          | Uncharacterized protein [Source:UniProtKB/TrEMBL;Acc:D3ZCM5] [ENSRNOT00000024501]                                                                                  | <b>28,139</b> |
| Gan        | Rattus norvegicus gigaxonin (Gan), mRNA [NM_001107434]                                                                                                             | <b>28,135</b> |
| Iffo2      | Rattus norvegicus intermediate filament family orphan 2 (Iffo2), mRNA [NM_001134703]                                                                               | <b>28,127</b> |
| RGD1311575 | Uncharacterized protein [Source:UniProtKB/TrEMBL;Acc:D4A5F4] [ENSRNOT0000002908]                                                                                   | <b>28,126</b> |



|            |                                                                                                                                              |               |
|------------|----------------------------------------------------------------------------------------------------------------------------------------------|---------------|
| Ppp2r3a    | Rattus norvegicus protein phosphatase 2, regulatory subunit B", alpha (Ppp2r3a), mRNA [NM_001012202]                                         | <b>28,116</b> |
| Sfrs15     | Rattus norvegicus splicing factor, arginine/serine-rich 15 (Sfrs15), mRNA [NM_001037347]                                                     | <b>28,103</b> |
| Cacna1c    | Rattus norvegicus calcium channel, voltage-dependent, L type, alpha 1C subunit (Cacna1c), mRNA [NM_012517]                                   | <b>28,096</b> |
| Dpf2       | Rattus norvegicus D4, zinc and double PHD fingers family 2 (Dpf2), mRNA [NM_001108516]                                                       | <b>28,091</b> |
| Slc38a9    | Rattus norvegicus solute carrier family 38, member 9 (Slc38a9), mRNA [NM_001035251]                                                          | <b>28,086</b> |
| Sp4        | Rattus norvegicus Sp4 transcription factor (Sp4), mRNA [NM_012761]                                                                           | <b>28,073</b> |
| Phyhip1    | Rattus norvegicus phytanoyl-CoA 2-hydroxylase interacting protein-like (Phyhip1), mRNA [NM_001012076]                                        | <b>28,050</b> |
| Kndc1      | PREDICTED: Rattus norvegicus kinase non-catalytic C-lobe domain (KIND) containing 1 (Kndc1), mRNA [XM_002725727]                             | <b>28,050</b> |
| RGD1305823 | Rattus norvegicus similar to RIKEN cDNA 0610037P05 (RGD1305823), mRNA [NM_001108261]                                                         | <b>28,046</b> |
| LOC685067  | PREDICTED: Rattus norvegicus similar to guanylate binding protein family, member 6 (LOC685067), miscRNA [XR_006095]                          | <b>28,034</b> |
| 0          | reversion-inducing cysteine-rich protein with Kazal motifs [Source:RefSeq peptide;Acc:NP_001101424] [ENSRNOT00000020755]                     | <b>28,013</b> |
| Egr1       | Early growth response protein 1 [Source:UniProtKB/Swiss-Prot;Acc:P08154] [ENSRNOT00000026303]                                                | <b>27,990</b> |
| RGD1560891 | RCG36219Uncharacterized protein [Source:UniProtKB/TrEMBL;Acc:D4ACQ4] [ENSRNOT00000044006]                                                    | <b>27,990</b> |
| Capza1     | Rattus norvegicus capping protein (actin filament) muscle Z-line, alpha 1 (Capza1), mRNA [NM_001109625]                                      | <b>27,984</b> |
| Tfcp2l1    | Rattus norvegicus transcription factor CP2-like 1 (Tfcp2l1), mRNA [NM_001107170]                                                             | <b>27,966</b> |
| Gnai1      | Rattus norvegicus guanine nucleotide binding protein (G protein), alpha inhibiting 1 (Gnai1), mRNA [NM_013145]                               | <b>27,960</b> |
| Elovl2     | Rattus norvegicus elongation of very long chain fatty acids (FEN1/Elo2, SUR4/Elo3, yeast)-like 2 (Elovl2), mRNA [NM_001109118]               | <b>27,957</b> |
| RGD1561472 | PREDICTED: Rattus norvegicus similar to mKIAA2005 protein (RGD1561472), miscRNA [XR_008610]                                                  | <b>27,956</b> |
| Lima1      | Rattus norvegicus LIM domain and actin binding 1 (Lima1), mRNA [NM_001191615]                                                                | <b>27,954</b> |
| Kcnip1     | Rattus norvegicus Kv channel-interacting protein 1 (Kcnip1), mRNA [NM_022929]                                                                | <b>27,951</b> |
| Serpinh1   | Rattus norvegicus serine (or cysteine) peptidase inhibitor, clade H, member 1 (Serpinh1), mRNA [NM_017173]                                   | <b>27,943</b> |
| LOC685438  | PREDICTED: Rattus norvegicus similar to paired immunoglobulin-like type 2 receptor beta (LOC685438), mRNA [XM_001063789]                     | <b>27,942</b> |
| 0          | Rattus norvegicus TL0ADA47YE11 mRNA sequence. [FQ229630]                                                                                     | <b>27,923</b> |
| Ccdc6      | Uncharacterized protein [Source:UniProtKB/TrEMBL;Acc:D4AEK9] [ENSRNOT00000032159]                                                            | <b>27,919</b> |
| Cyb5b      | Rattus norvegicus cytochrome b5 type B (outer mitochondrial membrane) (Cyb5b), nuclear gene encoding mitochondrial protein, mRNA [NM_030586] | <b>27,916</b> |
| Sorbs2     | Rattus norvegicus sorbin and SH3 domain containing 2 (Sorbs2), mRNA [NM_053770]                                                              | <b>27,916</b> |
| 0          | Unknown                                                                                                                                      | <b>27,911</b> |
| Plch1      | Rattus norvegicus TL0AAA86YN08 mRNA sequence. [FQ211591]                                                                                     | <b>27,894</b> |
| Agtrap     | Rattus norvegicus angiotensin II receptor-associated protein (Agtrap), mRNA [NM_001007654]                                                   | <b>27,885</b> |
| Sorcs1     | Rattus norvegicus sortilin-related VPS10 domain containing receptor 1 (Sorcs1), mRNA [NM_001191563]                                          | <b>27,884</b> |
| 0          | Rapgef1 protein [Source:UniProtKB/TrEMBL;Acc:Q5BJR9] [ENSRNOT00000030425]                                                                    | <b>27,878</b> |
| Gspt1      | Rattus norvegicus G1 to S phase transition 1 (Gspt1), mRNA [NM_001003978]                                                                    | <b>27,871</b> |
| Wwox       | Rattus norvegicus WW domain-containing oxidoreductase (Wwox), mRNA [NM_001106188]                                                            | <b>27,861</b> |

|            |                                                                                                                                             |               |
|------------|---------------------------------------------------------------------------------------------------------------------------------------------|---------------|
| Cul2       | Rattus norvegicus cullin 2 (Cul2), mRNA [NM_001108417]                                                                                      | <b>27,853</b> |
| 0          | Q4RQ24_TETNG (Q4RQ24) Chromosome 17 SCAF15006, whole genome shotgun sequence, partial (4%) [TC582327]                                       | <b>27,852</b> |
| 0          | Unknown                                                                                                                                     | <b>27,844</b> |
| Dbn1       | Rattus norvegicus drebrin 1 (Dbn1), mRNA [NM_031024]                                                                                        | <b>27,841</b> |
| Gpr158     | Rattus norvegicus G protein-coupled receptor 158 (Gpr158), mRNA [NM_001170326]                                                              | <b>27,826</b> |
| Sfrp1      | PREDICTED: Rattus norvegicus secreted frizzled-related protein 1 (Sfrp1), mRNA [XM_001072532]                                               | <b>27,826</b> |
| Mrpl47     | Rattus norvegicus mitochondrial ribosomal protein L47 (Mrpl47), nuclear gene encoding mitochondrial protein, mRNA [NM_001037183]            | <b>27,819</b> |
| LOC305633  | Rattus norvegicus similar to Antxr2 protein, mRNA (cDNA clone IMAGE:7322598). [BC088294]                                                    | <b>27,818</b> |
| Tm9sf1     | Rattus norvegicus transmembrane 9 superfamily member 1 (Tm9sf1), mRNA [NM_001012155]                                                        | <b>27,801</b> |
| Angel1     | Rattus norvegicus angel homolog 1 (Drosophila) (Angel1), mRNA [NM_001108717]                                                                | <b>27,801</b> |
| Ap1s2      | Rattus norvegicus adaptor-related protein complex 1, sigma 2 subunit (Ap1s2), mRNA [NM_001127531]                                           | <b>27,798</b> |
| 0          | AW143179 EST293475 Normalized rat brain, Bento Soares Rattus sp. cDNA clone RGIBF04 5' end, mRNA sequence [AW143179]                        | <b>27,791</b> |
| Entpd5     | Rattus norvegicus ectonucleoside triphosphate diphosphohydrolase 5 (Entpd5), mRNA [NM_199394]                                               | <b>27,772</b> |
| RGD1311345 | Rattus norvegicus similar to CG9752-PA (RGD1311345), mRNA [NM_001173436]                                                                    | <b>27,761</b> |
| 0          | Unknown                                                                                                                                     | <b>27,731</b> |
| 37865      | Rattus norvegicus septin 3 (Sept3), mRNA [NM_019375]                                                                                        | <b>27,723</b> |
| RGD1560286 | Rattus norvegicus similar to DNA segment, Chr 4, ERATO Doi 22, expressed (RGD1560286), transcript variant 1, mRNA [NM_001114599]            | <b>27,714</b> |
| Appbp2     | Rattus norvegicus amyloid beta precursor protein (cytoplasmic tail) binding protein 2 (Appbp2), mRNA [NM_001100969]                         | <b>27,709</b> |
| Sumo2      | Rattus norvegicus SMT3 suppressor of mif two 3 homolog 2 (S. cerevisiae) (Sumo2), mRNA [NM_133594]                                          | <b>27,706</b> |
| Gstm4      | Rattus norvegicus glutathione S-transferase mu 4 (Gstm4), mRNA [NM_001024304]                                                               | <b>27,705</b> |
| Zzef1      | Uncharacterized protein [Source:UniProtKB/TrEMBL;Acc:D3ZG78] [ENSRNOT00000036278]                                                           | <b>27,696</b> |
| Nr2e1      | Rattus norvegicus nuclear receptor subfamily 2, group E, member 1 (Nr2e1), mRNA [NM_001113197]                                              | <b>27,683</b> |
| 0          | Shultzomica03080 Rat lung airway and parenchyma cDNA libraries Rattus norvegicus cDNA clone Contig2706 5', mRNA sequence [CF109829]         | <b>27,652</b> |
| 0          | Unknown                                                                                                                                     | <b>27,650</b> |
| Bruno16    | Rattus norvegicus bruno-like 6, RNA binding protein (Drosophila) (Bruno16), mRNA [NM_001106827]                                             | <b>27,648</b> |
| Api5       | Rattus norvegicus apoptosis inhibitor 5 (Api5), mRNA [NM_001127379]                                                                         | <b>27,642</b> |
| Zcchc2     | Rattus norvegicus zinc finger, CCHC domain containing 2 (Zcchc2), mRNA [NM_001122677]                                                       | <b>27,637</b> |
| RGD1307493 | PREDICTED: Rattus norvegicus similar to membrane protein expressed in epithelial-like lung adenocarcinoma (RGD1307493), mRNA [XM_001080742] | <b>27,628</b> |
| Vma21      | PREDICTED: Rattus norvegicus similar to 2610030H06Rik protein (RGD1566155), mRNA [XM_001067193]                                             | <b>27,619</b> |
| 0          | Rattus norvegicus similar to glyceraldehyde-3-phosphate dehydrogenase (phosphorylating) (EC 1.2.1.12) - mouse (LOC363486), mRNA [XM_343809] | <b>27,617</b> |
| Pld1       | Rattus norvegicus phospholipase D1 (Pld1), mRNA [NM_030992]                                                                                 | <b>27,603</b> |
| 0          | Unknown                                                                                                                                     | <b>27,600</b> |

|            |                                                                                                                                                                                             |        |
|------------|---------------------------------------------------------------------------------------------------------------------------------------------------------------------------------------------|--------|
| Ace        | Rattus norvegicus angiotensin I converting enzyme (peptidyl-dipeptidase A) 1 (Ace), mRNA [NM_012544]                                                                                        | 27,596 |
| RGD1560612 | Uncharacterized protein [Source:UniProtKB/TrEMBL;Acc:D3ZKV2] [ENSRNOT00000041680]                                                                                                           | 27,593 |
| RGD1308907 | Rattus norvegicus similar to FLJ20689 (RGD1308907), mRNA [NM_001134559]                                                                                                                     | 27,588 |
| Nfat5      | Rattus norvegicus nuclear factor of activated T-cells 5 (Nfat5), mRNA [NM_001107425]                                                                                                        | 27,567 |
| Irs1       | Rattus norvegicus insulin receptor substrate 1 (Irs1), mRNA [NM_012969]                                                                                                                     | 27,554 |
| Akap6      | Rattus norvegicus A kinase (PRKA) anchor protein 6 (Akap6), mRNA [NM_022618]                                                                                                                | 27,543 |
| 0          | Unknown                                                                                                                                                                                     | 27,536 |
| 0          | slingshot homolog 1 (Drosophila) Gene [Source:MGI Symbol;Acc:MGI:2686240] [ENSRNOT00000044751]                                                                                              | 27,536 |
| MGC94207   | Rattus norvegicus similar to RIKEN cDNA C030006K11 (MGC94207), mRNA [NM_001007751]                                                                                                          | 27,536 |
| Tbc1d10b   | Rattus norvegicus TBC1 domain family, member 10b (Tbc1d10b), mRNA [NM_001108921]                                                                                                            | 27,535 |
| 0          | Unknown                                                                                                                                                                                     | 27,529 |
| Tecr       | Rattus norvegicus trans-2,3-enoyl-CoA reductase (Tecr), mRNA [NM_138549]                                                                                                                    | 27,524 |
| Bcl9       | Rattus norvegicus B-cell CLL/lymphoma 9 (Bcl9), mRNA [NM_001107703]                                                                                                                         | 27,520 |
| Igfbp5     | Insulin-like growth factor-binding protein 5 [Source:UniProtKB/Swiss-Prot;Acc:P24594] [ENSRNOT00000023530]                                                                                  | 27,512 |
| Pgap2      | Rattus norvegicus post-GPI attachment to proteins 2 (Pgap2), mRNA [NM_053895]                                                                                                               | 27,509 |
| Nfx1       | Rattus norvegicus nuclear transcription factor, X-box binding 1 (Nfx1), mRNA [NM_001024784]                                                                                                 | 27,502 |
| Hs6st1     | Rattus norvegicus heparan sulfate 6-O-sulfotransferase 1 (Hs6st1), mRNA [NM_001108210]                                                                                                      | 27,492 |
| 0          | Unknown                                                                                                                                                                                     | 27,483 |
| Dera       | PREDICTED: Rattus norvegicus 2-deoxyribose-5-phosphate aldolase homolog (C. elegans) (Dera), miscRNA [XR_085824]                                                                            | 27,482 |
| Pcdhb19    | PREDICTED: Rattus norvegicus protocadherin beta 19 (Pcdhb19), mRNA [XM_001056051]                                                                                                           | 27,481 |
| Zmat2      | Rattus norvegicus zinc finger, matrin type 2 (Zmat2), mRNA [NM_001135582]                                                                                                                   | 27,473 |
| 0          | Sema domain, transmembrane domain (TM), and cytoplasmic domain, (Semaphorin) 6A (Predicted), isoform CRA_aUncharacterized protein [Source:UniProtKB/TrEMBL;Acc:D3ZAG0] [ENSRNOT00000005476] | 27,470 |
| LOC682102  | Rattus norvegicus hypothetical protein LOC682102 (LOC682102), mRNA [NM_001134732]                                                                                                           | 27,467 |
| Commd2     | Rattus norvegicus COMM domain containing 2 (Commd2), mRNA [NM_001109503]                                                                                                                    | 27,465 |
| Cbll1      | Rattus norvegicus Cas-Br-M (murine) ecotropic retroviral transforming sequence-like 1 (Cbll1), mRNA [NM_001108018]                                                                          | 27,435 |
| 0          | Q6PG85_MOUSE (Q6PG85) NIPA-like domain containing 3, partial (75%) [TC618767]                                                                                                               | 27,433 |
| Upk2       | Rattus norvegicus uroplakin 2 (Upk2), mRNA [NM_001109523]                                                                                                                                   | 27,410 |
| LOC679114  | PREDICTED: Rattus norvegicus similar to sin3 associated polypeptide (LOC679114), mRNA [XM_001054754]                                                                                        | 27,398 |
| 0          | Unknown                                                                                                                                                                                     | 27,398 |
| 0          | Unknown                                                                                                                                                                                     | 27,393 |
| Fam114a1   | PREDICTED: Rattus norvegicus family with sequence similarity 114, member A1 (Fam114a1), mRNA [XM_001078310]                                                                                 | 27,393 |
| Xkr6       | Rattus norvegicus XK, Kell blood group complex subunit-related family, member 6 (Xkr6), mRNA [NM_001012042]                                                                                 | 27,392 |
| 0          | Unknown                                                                                                                                                                                     | 27,387 |

|            |                                                                                                                                  |               |
|------------|----------------------------------------------------------------------------------------------------------------------------------|---------------|
| Slmo1      | Rattus norvegicus slowmo homolog 1 (Drosophila) (Slmo1), mRNA [NM_001109570]                                                     | <b>27,386</b> |
| 0          | Unknown                                                                                                                          | <b>27,382</b> |
| Mbd1       | Rattus norvegicus methyl-CpG binding domain protein 1 (Mbd1), mRNA [NM_001011924]                                                | <b>27,382</b> |
| Atp6v1g2   | Rattus norvegicus ATPase, H+ transporting, lysosomal V1 subunit G2 (Atp6v1g2), mRNA [NM_212490]                                  | <b>27,382</b> |
| 0          | Rattus norvegicus cDNA clone IMAGE:7374474. [BC091254]                                                                           | <b>27,381</b> |
| Tk1        | Rattus norvegicus thymidine kinase 1, soluble (Tk1), mRNA [NM_052800]                                                            | <b>27,358</b> |
| RGD1561065 | Rattus norvegicus similar to mKIAA1111 protein (RGD1561065), mRNA [NM_001108253]                                                 | <b>27,358</b> |
| Gnat1      | Rattus norvegicus guanine nucleotide binding protein (G protein), alpha transducing 1 (Gnat1), mRNA [NM_001108780]               | <b>27,357</b> |
| 0          | Uncharacterized protein [Source:UniProtKB/TrEMBL;Acc:D3ZPG8] [ENSRNOT00000068110]                                                | <b>27,355</b> |
| Fam189b    | Rattus norvegicus family with sequence similarity 189, member B (Fam189b), mRNA [NM_001107690]                                   | <b>27,351</b> |
| Smg7       | Rattus norvegicus Smg-7 homolog, nonsense mediated mRNA decay factor (C. elegans) (Smg7), mRNA [NM_001191549]                    | <b>27,349</b> |
| Tspan9     | Rattus norvegicus tetraspanin 9 (Tspan9), mRNA [NM_001107890]                                                                    | <b>27,335</b> |
| Tmem150a   | Rattus norvegicus transmembrane protein 150A (Tmem150a), mRNA [NM_139107]                                                        | <b>27,329</b> |
| 0          | Unknown                                                                                                                          | <b>27,328</b> |
| Prr5       | Rattus norvegicus proline rich 5 (renal) (Prr5), mRNA [NM_001012121]                                                             | <b>27,322</b> |
| Slc22a23   | Rattus norvegicus solute carrier family 22, member 23 (Slc22a23), mRNA [NM_022624]                                               | <b>27,318</b> |
| Caln1      | Rattus norvegicus calneuron 1 (Caln1), mRNA [NM_001077201]                                                                       | <b>27,298</b> |
| Arl15      | PREDICTED: Rattus norvegicus ADP-ribosylation factor-like 15 (Arl15), mRNA [XM_001069431]                                        | <b>27,295</b> |
| Chrn1      | Rattus norvegicus cholinergic receptor, nicotinic, beta 1 (muscle) (Chrn1), mRNA [NM_012528]                                     | <b>27,294</b> |
| Bcl2l12    | Rattus norvegicus BCL2-like 12 (proline rich) (Bcl2l12), mRNA [NM_001108480]                                                     | <b>27,284</b> |
| Zfp180     | Rattus norvegicus zinc finger protein 180 (Zfp180), mRNA [NM_144757]                                                             | <b>27,283</b> |
| C2cd2      | Rattus norvegicus C2 calcium-dependent domain containing 2 (C2cd2), mRNA [NM_199391]                                             | <b>27,280</b> |
| MGC94282   | Rattus norvegicus similar to 5930416119Rik protein (MGC94282), transcript variant 1, non-coding RNA [NR_027366]                  | <b>27,280</b> |
| Mrpl38     | Rattus norvegicus mitochondrial ribosomal protein L38 (Mrpl38), nuclear gene encoding mitochondrial protein, mRNA [NM_001009369] | <b>27,277</b> |
| Lrrc20     | Rattus norvegicus leucine rich repeat containing 20 (Lrrc20), mRNA [NM_001109171]                                                | <b>27,261</b> |
| Tmem109    | Rattus norvegicus transmembrane protein 109 (Tmem109), mRNA [NM_001007736]                                                       | <b>27,257</b> |
| Rdh2       | Rattus norvegicus retinol dehydrogenase 2 (Rdh2), mRNA [NM_199208]                                                               | <b>27,253</b> |
| Cdh13      | Rattus norvegicus cadherin 13 (Cdh13), mRNA [NM_138889]                                                                          | <b>27,253</b> |
| Terc       | Rattus norvegicus telomerase RNA component (Terc), telomerase RNA [NR_001567]                                                    | <b>27,250</b> |
| Tor3a      | Rattus norvegicus torsin family 3, member A (Tor3a), mRNA [NM_001009683]                                                         | <b>27,249</b> |
| Iqgap3     | Rattus norvegicus IQ motif containing GTPase activating protein 3 (Iqgap3), mRNA [NM_001191709]                                  | <b>27,241</b> |
| Dnajc27    | Rattus norvegicus DnaJ (Hsp40) homolog, subfamily C, member 27 (Dnajc27), mRNA [NM_206845]                                       | <b>27,238</b> |
| Ankrd13b   | PREDICTED: Rattus norvegicus similar to novel protein (RGD1564005), mRNA [XM_001080794]                                          | <b>27,232</b> |
| Stx7       | Rattus norvegicus syntaxin 7 (Stx7), mRNA [NM_021869]                                                                            | <b>27,202</b> |

|           |                                                                                                                                       |        |
|-----------|---------------------------------------------------------------------------------------------------------------------------------------|--------|
| Lphn1     | Rattus norvegicus latrophilin 1 (Lphn1), mRNA [NM_022962]                                                                             | 27,184 |
| Lingo1    | Rattus norvegicus leucine rich repeat and Ig domain containing 1 (Lingo1), mRNA [NM_001100722]                                        | 27,182 |
| Crkl      | Rattus norvegicus v-crkl sarcoma virus CT10 oncogene homolog (avian)-like (Crkl), mRNA [NM_001008284]                                 | 27,145 |
| Fbxl16    | Rattus norvegicus F-box and leucine-rich repeat protein 16 (Fbxl16), mRNA [NM_001009504]                                              | 27,143 |
| Narf      | Rattus norvegicus nuclear prelamin A recognition factor (Narf), mRNA [NM_001039207]                                                   | 27,143 |
| Morn4     | Rattus norvegicus MORN repeat containing 4 (Morn4), mRNA [NM_001024975]                                                               | 27,141 |
| Olfm3     | Rattus norvegicus olfactomedin 3 (Olfm3), mRNA [NM_145777]                                                                            | 27,141 |
| 0         | Unknown                                                                                                                               | 27,137 |
| Map4k4    | Rattus norvegicus mitogen-activated protein kinase kinase kinase 4 (Map4k4), mRNA [NM_001106904]                                      | 27,125 |
| LOC688613 | Rattus norvegicus hypothetical protein LOC688613 (LOC688613), mRNA [NM_001134845]                                                     | 27,121 |
| Ubap1     | Rattus norvegicus ubiquitin-associated protein 1 (Ubap1), mRNA [NM_001012190]                                                         | 27,095 |
| Ppp1r7    | Rattus norvegicus protein phosphatase 1, regulatory (inhibitor) subunit 7 (Ppp1r7), mRNA [NM_001009825]                               | 27,095 |
| Tmem231   | PREDICTED: Rattus norvegicus similar to predicted CDS, putative protein of bilateral origin (4J193) (RGD1306153), mRNA [XM_001075665] | 27,092 |
| Pdzd11    | Rattus norvegicus PDZ domain containing 11 (Pdzd11), mRNA [NM_001106945]                                                              | 27,091 |
| Cacnb3    | Rattus norvegicus calcium channel, voltage-dependent, beta 3 subunit (Cacnb3), mRNA [NM_012828]                                       | 27,089 |
| Frs2      | Rattus norvegicus fibroblast growth factor receptor substrate 2 (Frs2), mRNA [NM_001108097]                                           | 27,086 |
| 0         | Unknown                                                                                                                               | 27,083 |
| Chst1     | Rattus norvegicus carbohydrate (keratan sulfate Gal-6) sulfotransferase 1 (Chst1), mRNA [NM_001011955]                                | 27,083 |
| Igsf11    | Rattus norvegicus immunoglobulin superfamily, member 11 (Igsf11), mRNA [NM_001013120]                                                 | 27,082 |
| 0         | Unknown                                                                                                                               | 27,078 |
| Htr2a     | 5-hydroxytryptamine receptor 2A [Source:UniProtKB/Swiss-Prot;Acc:P14842] [ENSRNOT00000013408]                                         | 27,064 |
| Shisa6    | Rattus norvegicus shisa homolog 6 (Xenopus laevis) (Shisa6), mRNA [NM_001191922]                                                      | 27,043 |
| Cables2   | Q8R3U5_MOUSE (Q8R3U5) Cables2-pending protein (Fragment), partial (97%) [TC630600]                                                    | 27,041 |
| 0         | UI-R-FS1-cqi-l-02-0-UI.s1 UI-R-FS1 Rattus norvegicus cDNA clone UI-R-FS1-cqi-l-02-0-UI 3', mRNA sequence [BU760441]                   | 27,029 |
| Pctk1     | Rattus norvegicus PCTAIRE protein kinase 1 (Pctk1), transcript variant 2, mRNA [NM_031077]                                            | 27,013 |
| 0         | Unknown                                                                                                                               | 27,001 |
| 0         | Unknown                                                                                                                               | 26,992 |
| Lyrn2     | Rattus norvegicus LYR motif containing 2 (Lyrn2), mRNA [NM_001126096]                                                                 | 26,989 |
| Actb      | Rattus norvegicus actin, beta (Actb), mRNA [NM_031144]                                                                                | 26,989 |
| 0         | Unknown                                                                                                                               | 26,984 |
| Gpr155    | Rattus norvegicus G protein-coupled receptor 155 (Gpr155), mRNA [NM_001107811]                                                        | 26,983 |
| 0         | Unknown                                                                                                                               | 26,976 |
| 0         | PREDICTED: Rattus norvegicus similar to putative pheromone receptor (Go-VN5) (LOC682835), mRNA [XM_001063328]                         | 26,974 |
| Helt      | PREDICTED: Rattus norvegicus HES/HEY-like transcription factor (Helt), miscRNA [XR_085643]                                            | 26,968 |

|            |                                                                                                                                       |               |
|------------|---------------------------------------------------------------------------------------------------------------------------------------|---------------|
| Fam113a    | Rattus norvegicus family with sequence similarity 113, member A (Fam113a), mRNA [NM_001012348]                                        | <b>26,964</b> |
| RGD1309543 | Rattus norvegicus similar to 2310014H01Rik protein (RGD1309543), mRNA [NM_001126287]                                                  | <b>26,961</b> |
| Cxxc4      | Rattus norvegicus CXXC finger 4 (Cxxc4), mRNA [NM_053342]                                                                             | <b>26,955</b> |
| 0          | Uncharacterized protein [Source:UniProtKB/TrEMBL;Acc:D4A9G6] [ENSRNOT00000034001]                                                     | <b>26,929</b> |
| Psen1      | Rattus norvegicus presenilin 1 (Psen1), mRNA [NM_019163]                                                                              | <b>26,926</b> |
| Sorl1      | Rattus norvegicus sortilin-related receptor, LDLR class A repeats-containing (Sorl1), mRNA [NM_053519]                                | <b>26,925</b> |
| Sez6l2     | Rattus norvegicus seizure related 6 homolog (mouse)-like 2 (Sez6l2), mRNA [NM_001107550]                                              | <b>26,918</b> |
| Olr213     | Rattus norvegicus olfactory receptor 213 (Olr213), mRNA [NM_001000735]                                                                | <b>26,909</b> |
| 0          | Unknown                                                                                                                               | <b>26,904</b> |
| 0          | Unknown                                                                                                                               | <b>26,903</b> |
| Zfp35      | Rattus norvegicus zinc finger protein 35 (Zfp35), mRNA [NM_001013141]                                                                 | <b>26,900</b> |
| RGD1564614 | Rattus norvegicus similar to complement factor H-related protein (RGD1564614), mRNA [NM_001134792]                                    | <b>26,895</b> |
| Vamp1      | Rattus norvegicus vesicle-associated membrane protein 1 (Vamp1), mRNA [NM_013090]                                                     | <b>26,889</b> |
| 0          | Protein prune homolog 2 [Source:UniProtKB/Swiss-Prot;Acc:Q5BJR4] [ENSRNOT00000054794]                                                 | <b>26,864</b> |
| Cd59       | Rattus norvegicus CD59 molecule, complement regulatory protein (Cd59), mRNA [NM_012925]                                               | <b>26,847</b> |
| 0          | Rattus norvegicus similar to RIKEN cDNA 1700001F09 (LOC316932), mRNA [XM_229506]                                                      | <b>26,846</b> |
| Runx1      | Rattus norvegicus runt-related transcription factor 1 (Runx1), mRNA [NM_017325]                                                       | <b>26,833</b> |
| Ggps1      | Rattus norvegicus geranylgeranyl diphosphate synthase 1 (Ggps1), mRNA [NM_001007626]                                                  | <b>26,810</b> |
| Acat3      | Rattus norvegicus acetyl-Coenzyme A acetyltransferase 3 (Acat3), mRNA [NM_001006995]                                                  | <b>26,808</b> |
| Mbp        | Rattus norvegicus myelin basic protein (Mbp), transcript variant 1, mRNA [NM_001025291]                                               | <b>26,807</b> |
| Stt3a      | Rattus norvegicus STT3, subunit of the oligosaccharyltransferase complex, homolog A (S. cerevisiae) (Stt3a), mRNA [NM_001134749]      | <b>26,804</b> |
| Prdm2      | Rattus norvegicus PR domain containing 2, with ZNF domain (Prdm2), mRNA [NM_001077648]                                                | <b>26,801</b> |
| Ddx41      | Rattus norvegicus DEAD (Asp-Glu-Ala-Asp) box polypeptide 41 (Ddx41), mRNA [NM_001108046]                                              | <b>26,797</b> |
| Tspan9     | Rattus norvegicus tetraspanin 9 (Tspan9), mRNA [NM_001107890]                                                                         | <b>26,792</b> |
| 0          | Rattus norvegicus TL0AEA59YG01 mRNA sequence. [FQ234328]                                                                              | <b>26,788</b> |
| Hivep3     | Rattus norvegicus human immunodeficiency virus type I enhancer binding protein 3 (Hivep3), mRNA [NM_001107972]                        | <b>26,788</b> |
| 0          | Uncharacterized protein [Source:UniProtKB/TrEMBL;Acc:D4A6V0] [ENSRNOT00000044039]                                                     | <b>26,775</b> |
| Rabgef1    | Rattus norvegicus RAB guanine nucleotide exchange factor (GEF) 1 (Rabgef1), mRNA [NM_001108333]                                       | <b>26,760</b> |
| Rbp2       | Rattus norvegicus retinol binding protein 2, cellular (Rbp2), mRNA [NM_012640]                                                        | <b>26,739</b> |
| Rai2       | Rattus norvegicus retinoic acid induced 2 (Rai2), mRNA [NM_001109316]                                                                 | <b>26,739</b> |
| Slc36a1    | Rattus norvegicus solute carrier family 36 (proton/amino acid symporter), member 1 (Slc36a1), mRNA [NM_130415]                        | <b>26,738</b> |
| Srm        | Rattus norvegicus spermidine synthase (Srm), mRNA [NM_053464]                                                                         | <b>26,732</b> |
| Ostm1      | Rattus norvegicus osteopetrosis associated transmembrane protein 1 (Ostm1), mRNA [NM_001029925]                                       | <b>26,726</b> |
| Aldh6a1    | Rattus norvegicus aldehyde dehydrogenase 6 family, member A1 (Aldh6a1), nuclear gene encoding mitochondrial protein, mRNA [NM_031057] | <b>26,726</b> |

|            |                                                                                                              |        |
|------------|--------------------------------------------------------------------------------------------------------------|--------|
| Ccna2      | Rattus norvegicus cyclin A2 (Ccna2), mRNA [NM_053702]                                                        | 26,725 |
| 0          | Unknown                                                                                                      | 26,719 |
| LOC503175  | PREDICTED: Rattus norvegicus similar to Protein KIAA0280 (LOC503175), mRNA [XM_578699]                       | 26,719 |
| Pex19      | Rattus norvegicus peroxisomal biogenesis factor 19 (Pex19), transcript variant 1, mRNA [NM_001107375]        | 26,714 |
| Mapt       | Rattus norvegicus microtubule-associated protein tau (Mapt), mRNA [NM_017212]                                | 26,709 |
| 0          | RCG44206Uncharacterized protein [Source:UniProtKB/TrEMBL;Acc:D3ZR35] [ENSRNOT00000006790]                    | 26,705 |
| Hist1h2bb  | Histone H2B [Source:UniProtKB/TrEMBL;Acc:D3ZWM5] [ENSRNOT00000030198]                                        | 26,699 |
| Akr1b8     | Rattus norvegicus aldo-keto reductase family 1, member B8 (Akr1b8), mRNA [NM_173136]                         | 26,695 |
| Tac2       | Rattus norvegicus tachykinin 2 (Tac2), mRNA [NM_019162]                                                      | 26,694 |
| RGD1563020 | Uncharacterized protein [Source:UniProtKB/TrEMBL;Acc:D3ZRK8] [ENSRNOT00000016940]                            | 26,691 |
| Tmed2      | Rattus norvegicus transmembrane emp24 domain trafficking protein 2 (Tmed2), mRNA [NM_031722]                 | 26,661 |
| Trpt1      | Rattus norvegicus tRNA phosphotransferase 1 (Trpt1), mRNA [NM_001106331]                                     | 26,640 |
| Mdc1       | Rattus norvegicus mediator of DNA damage checkpoint 1 (Mdc1), mRNA [NM_001166275]                            | 26,635 |
| Tjp1       | Rattus norvegicus tight junction protein 1 (Tjp1), mRNA [NM_001106266]                                       | 26,622 |
| Zdhhc19    | Rattus norvegicus zinc finger, DHHC-type containing 19 (Zdhhc19), mRNA [NM_001039259]                        | 26,622 |
| 0          | Unknown                                                                                                      | 26,616 |
| Zer1       | Rattus norvegicus zer-1 homolog (C. elegans) (Zer1), mRNA [NM_001100707]                                     | 26,613 |
| Sdc4       | Rattus norvegicus syndecan 4 (Sdc4), mRNA [NM_012649]                                                        | 26,613 |
| Nudt12     | Rattus norvegicus nudix (nucleoside diphosphate linked moiety X)-type motif 12 (Nudt12), mRNA [NM_001109010] | 26,590 |
| Pla2g2d    | Rattus norvegicus phospholipase A2, group IID (Pla2g2d), mRNA [NM_001013428]                                 | 26,585 |
| Mtmr1      | Rattus norvegicus myotubularin related protein 1 (Mtmr1), mRNA [NM_001191725]                                | 26,581 |
| Adam10     | PREDICTED: Rattus norvegicus ADAM metallopeptidase domain 10 (Adam10), mRNA [XM_001054737]                   | 26,576 |
| 0          | AGENCOURT_27851764 NIH_MGC_252 Rattus norvegicus cDNA clone IMAGE:7309973 5', mRNA sequence [CO400749]       | 26,561 |
| Irf5       | Rattus norvegicus interferon regulatory factor 5 (Irf5), mRNA [NM_001106586]                                 | 26,554 |
| Samd12     | Rattus norvegicus sterile alpha motif domain containing 12 (Samd12), mRNA [NM_001130562]                     | 26,552 |
| Snx19      | Rattus norvegicus sorting nexin 19 (Snx19), mRNA [NM_001108131]                                              | 26,552 |
| 0          | Unknown                                                                                                      | 26,544 |
| Mxi1       | Rattus norvegicus MAX interactor 1 (Mxi1), mRNA [NM_013160]                                                  | 26,537 |
| 0          | Unknown                                                                                                      | 26,520 |
| Pip4k2b    | Rattus norvegicus phosphatidylinositol-5-phosphate 4-kinase, type II, beta (Pip4k2b), mRNA [NM_053550]       | 26,519 |
| RGD1566380 | Rattus norvegicus hypothetical gene supported by NM_017187 (RGD1566380), mRNA [NM_001134593]                 | 26,518 |
| Gnpda1     | Rattus norvegicus glucosamine-6-phosphate deaminase 1 (Gnpda1), mRNA [NM_001134995]                          | 26,517 |
| Lin7a      | Rattus norvegicus lin-7 homolog a (C. elegans) (Lin7a), mRNA [NM_053514]                                     | 26,508 |
| Cyp21a1    | Rattus norvegicus cytochrome P450, family 21, subfamily a, polypeptide 1 (Cyp21a1), mRNA [NM_057101]         | 26,506 |

|           |                                                                                                                         |        |
|-----------|-------------------------------------------------------------------------------------------------------------------------|--------|
| 0         | Unknown                                                                                                                 | 26,502 |
| 0         | Unknown                                                                                                                 | 26,492 |
| Arhgef9   | Rattus norvegicus Cdc42 guanine nucleotide exchange factor (GEF) 9 (Arhgef9), mRNA [NM_023957]                          | 26,491 |
| Rab6a     | Rattus norvegicus RAB6A, member RAS oncogene family (Rab6a), mRNA [NM_053366]                                           | 26,485 |
| Tbc1d22b  | Rattus norvegicus TBC1 domain family, member 22B (Tbc1d22b), mRNA [NM_001025059]                                        | 26,484 |
| 0         | PREDICTED: Rattus norvegicus similar to 60S ribosomal protein L29 (P23) (RGD1564980), mRNA [XM_001053982]               | 26,482 |
| Trim32    | Rattus norvegicus tripartite motif-containing 32 (Trim32), mRNA [NM_001012103]                                          | 26,472 |
| Ppp1r9b   | Rattus norvegicus protein phosphatase 1, regulatory subunit 9B (Ppp1r9b), mRNA [NM_053474]                              | 26,463 |
| LOC690000 | PREDICTED: Rattus norvegicus similar to CG3740-PA, transcript variant 2 (LOC690000), mRNA [XM_001073988]                | 26,452 |
| 0         | Unknown                                                                                                                 | 26,447 |
| Filip1    | Rattus norvegicus filamin A interacting protein 1 (Filip1), mRNA [NM_145682]                                            | 26,442 |
| Dpp9      | PREDICTED: Rattus norvegicus dipeptidyl peptidase 9 (Dpp9), mRNA [XM_001061312]                                         | 26,441 |
| Gstt3     | Rattus norvegicus glutathione S-transferase, theta 3 (Gstt3), mRNA [NM_001137643]                                       | 26,441 |
| Plekhn3   | Uncharacterized protein [Source:UniProtKB/TrEMBL;Acc:D3ZSZ9] [ENSRNOT00000032782]                                       | 26,435 |
| Dysf      | Rattus norvegicus dysferlin (Dysf), mRNA [NM_001107869]                                                                 | 26,425 |
| Nucb1     | Rattus norvegicus nucleobindin 1 (Nucb1), mRNA [NM_053463]                                                              | 26,418 |
| Zmynd11   | Rattus norvegicus zinc finger, MYND domain containing 11 (Zmynd11), transcript variant 3, mRNA [NM_203369]              | 26,414 |
| 0         | Unknown                                                                                                                 | 26,410 |
| Fyn       | Rattus norvegicus FYN oncogene related to SRC, FGR, YES (Fyn), mRNA [NM_012755]                                         | 26,409 |
| Nptn      | Rattus norvegicus neuroplastin (Nptn), mRNA [NM_019380]                                                                 | 26,408 |
| LOC686539 | Rattus norvegicus similar to immunoglobulin superfamily containing leucine-rich repeat (LOC686539), mRNA [NM_001126300] | 26,400 |
| Ptprj     | Rattus norvegicus protein tyrosine phosphatase, receptor type, J (Ptprj), mRNA [NM_017269]                              | 26,399 |
| Phf17     | Rattus norvegicus PHD finger protein 17 (Phf17), mRNA [NM_001107670]                                                    | 26,395 |
| 0         | LRRGT00080 (LOC501233), mRNA [Source:RefSeq DNA;Acc:NM_001047967] [ENSRNOT00000066771]                                  | 26,370 |
| Sp1       | Rattus norvegicus Sp1 transcription factor (Sp1), mRNA [NM_012655]                                                      | 26,370 |
| Speg      | Rattus norvegicus SPEG complex locus (Speg), transcript variant 1, mRNA [NM_001108802]                                  | 26,366 |
| Gtpbp3    | Rattus norvegicus GTP binding protein 3 (Gtpbp3), nuclear gene encoding mitochondrial protein, mRNA [NM_001011919]      | 26,356 |
| Strada    | Rattus norvegicus STE20-related kinase adaptor alpha (Strada), mRNA [NM_182820]                                         | 26,356 |
| Trhde     | Rattus norvegicus thyrotropin-releasing hormone degrading enzyme (Trhde), mRNA [NM_001108991]                           | 26,349 |
| 0         | Uncharacterized protein [Source:UniProtKB/TrEMBL;Acc:D4ACD7] [ENSRNOT00000014120]                                       | 26,336 |
| Dio3      | Rattus norvegicus deiodinase, iodothyronine, type III (Dio3), mRNA [NM_017210]                                          | 26,333 |
| LOC690326 | Rattus norvegicus hypothetical protein LOC690326 (LOC690326), mRNA [NM_001109578]                                       | 26,326 |
| Hpca      | Rattus norvegicus hippocalcin (Hpca), mRNA [NM_017122]                                                                  | 26,322 |
| Impad1    | Rattus norvegicus inositol monophosphatase domain containing 1 (Impad1), mRNA [NM_001008772]                            | 26,318 |



|            |                                                                                                                                      |               |
|------------|--------------------------------------------------------------------------------------------------------------------------------------|---------------|
| Caly       | Rattus norvegicus calcyon neuron-specific vesicular protein (Caly), transcript variant 1, mRNA [NM_138915]                           | <b>26,317</b> |
| Dlgap3     | Rattus norvegicus discs, large (Drosophila) homolog-associated protein 3 (Dlgap3), mRNA [NM_173138]                                  | <b>26,314</b> |
| RGD1566319 | Rattus norvegicus similar to Sestrin 2 (Hi95) (RGD1566319), mRNA [NM_001109358]                                                      | <b>26,311</b> |
| Ddn        | Rattus norvegicus dendrin (Ddn), mRNA [NM_030993]                                                                                    | <b>26,299</b> |
| 0          | Unknown                                                                                                                              | <b>26,296</b> |
| Ceacam19   | Rattus norvegicus carcinoembryonic antigen-related cell adhesion molecule 19 (Ceacam19), mRNA [NM_001198970]                         | <b>26,294</b> |
| Ercc6      | Rattus norvegicus excision repair cross-complementing rodent repair deficiency, complementation group 6 (Ercc6), mRNA [NM_001107296] | <b>26,287</b> |
| 0          | Uncharacterized protein [Source:UniProtKB/TrEMBL;Acc:D3ZD04] [ENSRNOT00000045918]                                                    | <b>26,281</b> |
| Mblac2     | Rattus norvegicus metallo-beta-lactamase domain containing 2 (Mblac2), mRNA [NM_001108934]                                           | <b>26,278</b> |
| 0          | Uncharacterized protein [Source:UniProtKB/TrEMBL;Acc:D4A1B0] [ENSRNOT00000045263]                                                    | <b>26,269</b> |
| Zfp385d    | Rattus norvegicus zinc finger protein 385D (Zfp385d), mRNA [NM_001013992]                                                            | <b>26,263</b> |
| Kcnc1      | Rattus norvegicus potassium voltage gated channel, Shaw-related subfamily, member 1 (Kcnc1), mRNA [NM_012856]                        | <b>26,257</b> |
| 0          | Unknown                                                                                                                              | <b>26,246</b> |
| Fbxl7      | Rattus norvegicus F-box and leucine-rich repeat protein 7 (Fbxl7), mRNA [NM_001108545]                                               | <b>26,242</b> |
| RGD1566112 | Rattus norvegicus similar to pleckstrin homology domain protein (5V327) (RGD1566112), mRNA [NM_001127566]                            | <b>26,234</b> |
| Elmod1     | Rattus norvegicus ELMO/CED-12 domain containing 1 (Elmod1), mRNA [NM_001191579]                                                      | <b>26,232</b> |
| Ankrd61    | Rattus norvegicus ankyrin repeat domain 61 (Ankrd61), mRNA [NM_001044297]                                                            | <b>26,231</b> |
| 0          | D42151S6 Rattus norvegicus gene for Ad4BP, complete cds and exon 7 [D42156]                                                          | <b>26,228</b> |
| Atg13      | Rattus norvegicus TL0ACA31YH23 mRNA sequence. [FQ217242]                                                                             | <b>26,223</b> |
| Myo5a      | Rattus norvegicus myosin VA (Myo5a), mRNA [NM_022178]                                                                                | <b>26,220</b> |
| Stac2      | Rattus norvegicus SH3 and cysteine rich domain 2 (Stac2), mRNA [NM_001108834]                                                        | <b>26,220</b> |
| Med1       | Rattus norvegicus mediator complex subunit 1 (Med1), mRNA [NM_001134361]                                                             | <b>26,219</b> |
| Stx1a      | Rattus norvegicus syntaxin 1A (brain) (Stx1a), mRNA [NM_053788]                                                                      | <b>26,204</b> |
| Cpne4      | Rattus norvegicus copine IV (Cpne4), mRNA [NM_001109003]                                                                             | <b>26,197</b> |
| LOC688390  | Rattus norvegicus hypothetical protein LOC688390 (LOC688390), mRNA [NM_001109496]                                                    | <b>26,196</b> |
| LOC688272  | PREDICTED: Rattus norvegicus similar to ring finger protein 157 (LOC688272), mRNA [XM_001081716]                                     | <b>26,193</b> |
| Wnk2       | Rattus norvegicus WNK lysine deficient protein kinase 2 (Wnk2), mRNA [NM_001191556]                                                  | <b>26,186</b> |
| Slc1a4     | Rattus norvegicus solute carrier family 1 (glutamate/neutral amino acid transporter), member 4 (Slc1a4), mRNA [NM_198763]            | <b>26,176</b> |
| Hist1h2bl  | Rattus norvegicus histone cluster 1, H2bl (Hist1h2bl), mRNA [NM_022647]                                                              | <b>26,175</b> |
| RGD1563049 | Rattus norvegicus RGD1563049 (RGD1563049), mRNA [NM_001134521]                                                                       | <b>26,168</b> |
| Pank1      | Rattus norvegicus pantothenate kinase 1 (Pank1), mRNA [NM_001106373]                                                                 | <b>26,158</b> |
| Gprc5b     | Rattus norvegicus G protein-coupled receptor, family C, group 5, member B (Gprc5b), mRNA [NM_001106304]                              | <b>26,155</b> |
| Sft2d3     | Rattus norvegicus SFT2 domain containing 3 (Sft2d3), mRNA [NM_001108887]                                                             | <b>26,150</b> |
| Sox9       | PREDICTED: Rattus norvegicus SRY-box containing gene 9 (Sox9), mRNA [XM_343981]                                                      | <b>26,130</b> |

|              |                                                                                                                       |               |
|--------------|-----------------------------------------------------------------------------------------------------------------------|---------------|
| Jazf1        | PREDICTED: Rattus norvegicus JAZF zinc finger 1 (Jazf1), mRNA [XM_002726367]                                          | <b>26,125</b> |
| Klf12        | Rattus norvegicus Kruppel-like factor 12 (Klf12), mRNA [NM_001107281]                                                 | <b>26,111</b> |
| S1pr2        | Rattus norvegicus sphingosine-1-phosphate receptor 2 (S1pr2), mRNA [NM_017192]                                        | <b>26,111</b> |
| LOC305052    | PREDICTED: Rattus norvegicus hypothetical LOC305052 (LOC305052), miscRNA [XR_008366]                                  | <b>26,109</b> |
| Ptbp1        | Rattus norvegicus polypyrimidine tract binding protein 1 (Ptbp1), transcript variant 2, mRNA [NM_022516]              | <b>26,104</b> |
| RGD1309707   | Rattus norvegicus similar to RIKEN cDNA 4930431E10 (RGD1309707), mRNA [NM_001109598]                                  | <b>26,091</b> |
| RGD1309651   | Uncharacterized protein [Source:UniProtKB/TrEMBL;Acc:D3ZSX5] [ENSRNOT00000023721]                                     | <b>26,089</b> |
| Faah         | Rattus norvegicus fatty acid amide hydrolase (Faah), mRNA [NM_024132]                                                 | <b>26,086</b> |
| Socs7        | Uncharacterized protein [Source:UniProtKB/TrEMBL;Acc:D4A4T8] [ENSRNOT00000014943]                                     | <b>26,083</b> |
| 0            | Unknown                                                                                                               | <b>26,080</b> |
| RGD1305464   | Rattus norvegicus similar to human chromosome 15 open reading frame 39 (RGD1305464), mRNA [NM_001025011]              | <b>26,068</b> |
| Acvr1b       | Rattus norvegicus activin A receptor, type IB (Acvr1b), mRNA [NM_199230]                                              | <b>26,066</b> |
| Sfrp2        | Rattus norvegicus secreted frizzled-related protein 2 (Sfrp2), mRNA [NM_001100700]                                    | <b>26,055</b> |
| LOC100362040 | Rattus norvegicus Ac2-143-like (LOC100362040), mRNA [NM_001177817]                                                    | <b>26,045</b> |
| Rcan2        | Rattus norvegicus regulator of calcineurin 2 (Rcan2), mRNA [NM_175578]                                                | <b>26,042</b> |
| Stam2        | Rattus norvegicus signal transducing adaptor molecule (SH3 domain and ITAM motif) 2 (Stam2), mRNA [NM_001012085]      | <b>26,038</b> |
| L1cam        | Rattus norvegicus L1 cell adhesion molecule (L1cam), mRNA [NM_017345]                                                 | <b>26,036</b> |
| Bcas1        | Rattus norvegicus breast carcinoma amplified sequence 1 (Bcas1), mRNA [NM_145670]                                     | <b>26,034</b> |
| Timp4        | Rattus norvegicus tissue inhibitor of metalloproteinase 4 (Timp4), mRNA [NM_001109393]                                | <b>26,033</b> |
| Spry4        | Rattus norvegicus sprouty homolog 4 (Drosophila) (Spry4), mRNA [NM_001106150]                                         | <b>26,029</b> |
| Atp10b       | Uncharacterized protein [Source:UniProtKB/TrEMBL;Acc:D4A4W5] [ENSRNOT00000029118]                                     | <b>26,027</b> |
| 0            | Unknown                                                                                                               | <b>26,026</b> |
| Gira1        | Rattus norvegicus glycine receptor, alpha 1 (Gira1), mRNA [NM_013133]                                                 | <b>26,019</b> |
| Ptgfrn       | Rattus norvegicus prostaglandin F2 receptor negative regulator (Ptgfrn), mRNA [NM_019243]                             | <b>26,015</b> |
| Ncor1        | PREDICTED: Rattus norvegicus nuclear receptor co-repressor 1 (Ncor1), mRNA [XM_001077495]                             | <b>26,007</b> |
| Pla2g4f      | PREDICTED: Rattus norvegicus phospholipase A2, group IVF (Pla2g4f), mRNA [XM_001080057]                               | <b>26,003</b> |
| Klhl25       | Rattus norvegicus kelch-like 25 (Drosophila) (Klhl25), mRNA [NM_001039006]                                            | <b>25,996</b> |
| 0            | TGF-beta activated kinase 1/MAP3K7 binding protein 3 Gene [Source:MGI Symbol;Acc:MGI:1913974] [ENSRNOT00000004854]    | <b>25,995</b> |
| Taf9b        | Rattus norvegicus TAF9B RNA polymerase II, TATA box binding protein (TBP)-associated factor (Taf9b), mRNA [NM_133615] | <b>25,994</b> |
| 0            | MTA3_HUMAN (Q9BTC8) Metastasis-associated protein MTA3, partial (5%) [TC620956]                                       | <b>25,992</b> |
| Ccnc         | Rattus norvegicus cyclin C (Ccnc), mRNA [NM_001100472]                                                                | <b>25,991</b> |
| Opcml        | Rattus norvegicus opioid binding protein/cell adhesion molecule-like (Opcml), mRNA [NM_053848]                        | <b>25,979</b> |
| Herv-frd     | Rattus norvegicus HERV-FRD provirus ancestral Env polyprotein (Herv-frd), mRNA [NM_001024239]                         | <b>25,973</b> |
| Epb41l3      | Rattus norvegicus erythrocyte membrane protein band 4.1-like 3 (Epb41l3), mRNA [NM_053927]                            | <b>25,971</b> |

|            |                                                                                                                                         |               |
|------------|-----------------------------------------------------------------------------------------------------------------------------------------|---------------|
| Des        | Rattus norvegicus desmin (Des), mRNA [NM_022531]                                                                                        | <b>25,950</b> |
| 0          | Unknown                                                                                                                                 | <b>25,947</b> |
| Hk1        | Rattus norvegicus hexokinase 1 (Hk1), nuclear gene encoding mitochondrial protein, mRNA [NM_012734]                                     | <b>25,945</b> |
| 0          | AF4/FMR2 family, member 2 Gene [Source:MGI Symbol;Acc:MGI:1202294] [ENSRNOT00000065537]                                                 | <b>25,944</b> |
| Fasn       | Rattus norvegicus fatty acid synthase (Fasn), mRNA [NM_017332]                                                                          | <b>25,938</b> |
| Uhrf1bp1l  | Rattus norvegicus UHRF1 binding protein 1-like (Uhrf1bp1l), mRNA [NM_001108753]                                                         | <b>25,937</b> |
| Pik3r2     | Rattus norvegicus phosphoinositide-3-kinase, regulatory subunit 2 (beta) (Pik3r2), mRNA [NM_022185]                                     | <b>25,928</b> |
| Sema3f     | Rattus norvegicus sema domain, immunoglobulin domain (Ig), short basic domain, secreted, (semaphorin) 3 F (Sema3f), mRNA [NM_001108185] | <b>25,927</b> |
| Snn        | Rattus norvegicus stannin (Snn), mRNA [NM_001034083]                                                                                    | <b>25,927</b> |
| Chrna7     | Rattus norvegicus cholinergic receptor, nicotinic, alpha 7 (Chrna7), mRNA [NM_012832]                                                   | <b>25,922</b> |
| Znf536     | Uncharacterized protein [Source:UniProtKB/TrEMBL;Acc:D3ZJS6] [ENSRNOT00000018956]                                                       | <b>25,920</b> |
| RGD1562342 | Rattus norvegicus similar to RIKEN cDNA 1110012D08 (RGD1562342), mRNA [NM_001109281]                                                    | <b>25,917</b> |
| Lrrtm4     | Rattus norvegicus leucine rich repeat transmembrane neuronal 4 (Lrrtm4), mRNA [NM_001134746]                                            | <b>25,916</b> |
| Ubxn4      | Rattus norvegicus UBX domain protein 4 (Ubxn4), mRNA [NM_001012025]                                                                     | <b>25,912</b> |
| RGD1308319 | PREDICTED: Rattus norvegicus similar to KIAA0802 protein (RGD1308319), partial mRNA [XM_002727262]                                      | <b>25,912</b> |
| Ccdc8      | Rattus norvegicus coiled-coil domain containing 8 (Ccdc8), mRNA [NM_001009533]                                                          | <b>25,904</b> |
| Shisa5     | Rattus norvegicus shisa homolog 5 (Xenopus laevis) (Shisa5), mRNA [NM_001006989]                                                        | <b>25,903</b> |
| 0          | Unknown                                                                                                                                 | <b>25,897</b> |
| 0          | Unknown                                                                                                                                 | <b>25,896</b> |
| Cd68       | Rattus norvegicus Cd68 molecule (Cd68), mRNA [NM_001031638]                                                                             | <b>25,874</b> |
| Rab22a     | Rattus norvegicus RAB22A, member RAS oncogene family (Rab22a), mRNA [NM_001108966]                                                      | <b>25,865</b> |
| LOC691352  | Rattus norvegicus similar to Robo-1 (LOC691352), mRNA [NM_001109638]                                                                    | <b>25,864</b> |
| Col4a5     | PREDICTED: Rattus norvegicus collagen, type IV, alpha 5 (Col4a5), mRNA [XM_001055156]                                                   | <b>25,845</b> |
| Slc12a3    | Rattus norvegicus solute carrier family 12 (sodium/chloride transporters), member 3 (Slc12a3), mRNA [NM_019345]                         | <b>25,842</b> |
| 0          | Unknown                                                                                                                                 | <b>25,840</b> |
| Vom2r65    | Rattus norvegicus vomeronasal 2 receptor, 65 (Vom2r65), mRNA [NM_001099654]                                                             | <b>25,834</b> |
| Arl6ip5    | Rattus norvegicus ADP-ribosylation-like factor 6 interacting protein 5 (Arl6ip5), mRNA [NM_023972]                                      | <b>25,825</b> |
| RGD1564719 | Rattus norvegicus similar to RIKEN cDNA C230052I12 (RGD1564719), mRNA [NM_001109335]                                                    | <b>25,819</b> |
| 0          | Rattus norvegicus hypothetical LOC100125371, mRNA (cDNA clone MGC:105701 IMAGE:7309421), complete cds. [BC089106]                       | <b>25,818</b> |
| Rabif      | Rattus norvegicus RAB interacting factor (Rabif), mRNA [NM_001007678]                                                                   | <b>25,817</b> |
| Sidt2      | Rattus norvegicus SID1 transmembrane family, member 2 (Sidt2), mRNA [NM_001108142]                                                      | <b>25,814</b> |
| Col4a1     | Rattus norvegicus collagen, type IV, alpha 1 (Col4a1), mRNA [NM_001135009]                                                              | <b>25,796</b> |
| Slc12a7    | Rattus norvegicus solute carrier family 12 (potassium/chloride transporters), member 7 (Slc12a7), mRNA [NM_001013144]                   | <b>25,795</b> |
| Vat1       | Rattus norvegicus vesicle amine transport protein 1 homolog (T californica) (Vat1), mRNA [NM_001033683]                                 | <b>25,793</b> |

|         |                                                                                                                                     |        |
|---------|-------------------------------------------------------------------------------------------------------------------------------------|--------|
| Akap12  | Rattus norvegicus A kinase (PRKA) anchor protein 12 (Akap12), transcript variant 1, mRNA [NM_057103]                                | 25,788 |
| 0       | Rattus norvegicus TL0AEA10Y110 mRNA sequence. [FQ228098]                                                                            | 25,784 |
| Pkm2    | Rattus norvegicus clone UI-R-FJ0-cpu-c-03-0-UI unknown mRNA. [AY724474]                                                             | 25,775 |
| Xbp1    | Rattus norvegicus X-box binding protein 1 (Xbp1), mRNA [NM_001004210]                                                               | 25,774 |
| Rfesd   | Rattus norvegicus Rieske (Fe-S) domain containing (Rfesd), mRNA [NM_001108540]                                                      | 25,767 |
| Rnf5    | Rattus norvegicus ring finger protein 5 (Rnf5), mRNA [NM_001109025]                                                                 | 25,765 |
| Chsy1   | Rattus norvegicus chondroitin sulfate synthase 1 (Chsy1), mRNA [NM_001106268]                                                       | 25,764 |
| Gpr123  | Rattus norvegicus G protein-coupled receptor 123 (Gpr123), mRNA [NM_001107559]                                                      | 25,759 |
| Dctd    | Rattus norvegicus dCMP deaminase (Dctd), transcript variant 1, mRNA [NM_001013882]                                                  | 25,758 |
| Lsamp   | Rattus norvegicus limbic system-associated membrane protein (Lsamp), mRNA [NM_017242]                                               | 25,751 |
| Gsk3b   | Rattus norvegicus glycogen synthase kinase 3 beta (Gsk3b), mRNA [NM_032080]                                                         | 25,742 |
| Myef2   | Rattus norvegicus myelin expression factor 2 (Myef2), mRNA [NM_001013205]                                                           | 25,742 |
| Tcerg1l | Rattus norvegicus transcription elongation regulator 1-like (Tcerg1l), mRNA [NM_001130077]                                          | 25,742 |
| Cs      | Rattus norvegicus citrate synthase (Cs), nuclear gene encoding mitochondrial protein, mRNA [NM_130755]                              | 25,734 |
| Rnf4    | Rattus norvegicus ring finger protein 4 (Rnf4), mRNA [NM_019182]                                                                    | 25,730 |
| Stom    | Rattus norvegicus stomatin (Stom), mRNA [NM_001011965]                                                                              | 25,729 |
| 0       | Unknown                                                                                                                             | 25,726 |
| Grip1   | Rattus norvegicus glutamate receptor interacting protein isoform c4-7 (GRIP1) mRNA, complete cds; alternatively spliced. [AY437398] | 25,724 |
| Ccl22   | Rattus norvegicus chemokine (C-C motif) ligand 22 (Ccl22), mRNA [NM_057203]                                                         | 25,722 |
| Celsr3  | Rattus norvegicus cadherin, EGF LAG seven-pass G-type receptor 3 (flamingo homolog, Drosophila) (Celsr3), mRNA [NM_031320]          | 25,720 |
| 0       | Unknown                                                                                                                             | 25,717 |
| Tnpo2   | Rattus norvegicus transportin 2 (Tnpo2), mRNA [NM_001107166]                                                                        | 25,713 |
| Usp46   | Rattus norvegicus ubiquitin specific peptidase 46 (Usp46), mRNA [NM_001191596]                                                      | 25,712 |
| Smn1    | Rattus norvegicus survival motor neuron 1 (Smn1), mRNA [NM_022509]                                                                  | 25,711 |
| Myst2   | Rattus norvegicus MYST histone acetyltransferase 2 (Myst2), mRNA [NM_181081]                                                        | 25,698 |
| Tsc22d4 | Rattus norvegicus TSC22 domain family, member 4 (Tsc22d4), mRNA [NM_001044284]                                                      | 25,671 |
| Uck1    | Rattus norvegicus uridine-cytidine kinase 1 (Uck1), mRNA [NM_001107831]                                                             | 25,666 |
| Atp1a3  | Rattus norvegicus ATPase, Na <sup>+</sup> /K <sup>+</sup> transporting, alpha 3 polypeptide (Atp1a3), mRNA [NM_012506]              | 25,665 |
| Ppt1    | Rattus norvegicus palmitoyl-protein thioesterase 1 (Ppt1), mRNA [NM_022502]                                                         | 25,665 |
| Ppif    | Rattus norvegicus peptidylprolyl isomerase F (Ppif), nuclear gene encoding mitochondrial protein, mRNA [NM_172243]                  | 25,647 |
| 0       | Rattus norvegicus similar to RIKEN cDNA 1200007D18 (LOC287177), mRNA [XM_213272]                                                    | 25,645 |
| Pias3   | Rattus norvegicus protein inhibitor of activated STAT, 3 (Pias3), mRNA [NM_031784]                                                  | 25,635 |
| Nova2   | PREDICTED: Rattus norvegicus neuro-oncological ventral antigen 2 (Nova2), mRNA [XM_001075246]                                       | 25,629 |
| Ggct    | Rattus norvegicus gamma-glutamyl cyclotransferase (Ggct), mRNA [NM_001108629]                                                       | 25,627 |

|            |                                                                                                                                          |               |
|------------|------------------------------------------------------------------------------------------------------------------------------------------|---------------|
| Tgm3       | Rattus norvegicus transglutaminase 3, E polypeptide (Tgm3), mRNA [NM_001108959]                                                          | <b>25,624</b> |
| Ptpdc1     | Rattus norvegicus protein tyrosine phosphatase domain containing 1 (Ptpdc1), mRNA [NM_001106104]                                         | <b>25,617</b> |
| RGD1564058 | Rattus norvegicus similar to cDNA sequence BC056474 (RGD1564058), mRNA [NM_001105947]                                                    | <b>25,615</b> |
| Man2b2     | Rattus norvegicus mannosidase, alpha, class 2B, member 2 (Man2b2), mRNA [NM_001134971]                                                   | <b>25,609</b> |
| Rassf3     | Rattus norvegicus Ras association (RalGDS/AF-6) domain family member 3 (Rassf3), mRNA [NM_001108747]                                     | <b>25,608</b> |
| 0          | Unknown                                                                                                                                  | <b>25,601</b> |
| Slc16a7    | Rattus norvegicus solute carrier family 16, member 7 (monocarboxylic acid transporter 2) (Slc16a7), mRNA [NM_017302]                     | <b>25,598</b> |
| Dpysl4     | Rattus norvegicus dihydropyrimidinase-like 4 (Dpysl4), mRNA [NM_012933]                                                                  | <b>25,595</b> |
| 0          | PREDICTED: Rattus norvegicus similar to 60S ribosomal protein L29 (P23) (RGD1563134), mRNA [XM_001080572]                                | <b>25,586</b> |
| Strada     | Rattus norvegicus STE20-related kinase adaptor alpha (Strada), mRNA [NM_182820]                                                          | <b>25,583</b> |
| She        | Uncharacterized protein [Source:UniProtKB/TrEMBL;Acc:D3ZSK0] [ENSRNOT00000028225]                                                        | <b>25,578</b> |
| Lifr       | Rattus norvegicus leukemia inhibitory factor receptor alpha (Lifr), mRNA [NM_031048]                                                     | <b>25,577</b> |
| Plg        | Rattus norvegicus plasminogen (Plg), mRNA [NM_053491]                                                                                    | <b>25,571</b> |
| Prosc      | Rattus norvegicus TL0ACA41YL07 mRNA sequence. [FQ216663]                                                                                 | <b>25,560</b> |
| RGD1306446 | Rattus norvegicus similar to RIKEN cDNA 9930032O22 gene (RGD1306446), mRNA [NM_001008554]                                                | <b>25,556</b> |
| Rhbdd2     | Rattus norvegicus rhomboid domain containing 2 (Rhbdd2), mRNA [NM_001191827]                                                             | <b>25,536</b> |
| Hist1h2bc  | Rattus norvegicus histone cluster 1, H2bc (Hist1h2bc), mRNA [NM_001109400]                                                               | <b>25,525</b> |
| Rasd2      | Rattus norvegicus RASD family, member 2 (Rasd2), mRNA [NM_133568]                                                                        | <b>25,520</b> |
| RGD1306151 | Rattus norvegicus similar to hypothetical protein DKFZp761D0211 (RGD1306151), mRNA [NM_001108652]                                        | <b>25,507</b> |
| 0          | Unknown                                                                                                                                  | <b>25,507</b> |
| Zic2       | Rattus norvegicus Zic family member 2 (odd-paired homolog, Drosophila) (Zic2), mRNA [NM_001108392]                                       | <b>25,499</b> |
| Arhgap17   | Rattus norvegicus Rho GTPase activating protein 17 (Arhgap17), mRNA [NM_022244]                                                          | <b>25,477</b> |
| 0          | Unknown                                                                                                                                  | <b>25,475</b> |
| Snap91     | Rattus norvegicus synaptosomal-associated protein 91 (Snap91), mRNA [NM_031728]                                                          | <b>25,472</b> |
| 0          | Unknown                                                                                                                                  | <b>25,461</b> |
| Susd4      | Rattus norvegicus sushi domain containing 4 (Susd4), mRNA [NM_001105982]                                                                 | <b>25,451</b> |
| Elavl1     | Rattus norvegicus ELAV (embryonic lethal, abnormal vision, Drosophila)-like 1 (Hu antigen R) (Elavl1), mRNA [NM_001108848]               | <b>25,447</b> |
| Slc25a34   | Rattus norvegicus solute carrier family 25, member 34 (Slc25a34), mRNA [NM_001013936]                                                    | <b>25,431</b> |
| Cenpm      | Rattus norvegicus centromere protein M (Cenpm), mRNA [NM_001130504]                                                                      | <b>25,417</b> |
| Cdc42bpb   | Rattus norvegicus CDC42 binding protein kinase beta (DMPK-like) (Cdc42bpb), mRNA [NM_053620]                                             | <b>25,410</b> |
| Tbkbp1     | Rattus norvegicus TBK1 binding protein 1 (Tbkbp1), mRNA [NM_172021]                                                                      | <b>25,408</b> |
| Rffl       | Rattus norvegicus ring finger and FYVE like domain containing protein (Rffl), mRNA [NM_001004068]                                        | <b>25,401</b> |
| 0          | RNA binding motif protein 27 (Predicted), isoform CRA_aUncharacterized protein [Source:UniProtKB/TrEMBL;Acc:D3ZE52] [ENSRNOT00000060199] | <b>25,395</b> |

|            |                                                                                                                                                                                             |        |
|------------|---------------------------------------------------------------------------------------------------------------------------------------------------------------------------------------------|--------|
| Fut9       | Rattus norvegicus fucosyltransferase 9 (alpha (1,3) fucosyltransferase) (Fut9), mRNA [NM_053465]                                                                                            | 25,387 |
| Ece1       | Endothelin-converting enzyme 1 [Source:UniProtKB/Swiss-Prot;Acc:P42893] [ENSRNOT00000067616]                                                                                                | 25,384 |
| Trpc2      | Rattus norvegicus transient receptor potential cation channel, subfamily C, member 2, mRNA (cDNA clone MGC:189397 IMAGE:9091675), complete cds. [BC169022]                                  | 25,382 |
| Taok2      | Rattus norvegicus TAO kinase 2 (Taok2), mRNA [NM_022702]                                                                                                                                    | 25,379 |
| Phldb1     | Rattus norvegicus pleckstrin homology-like domain, family B, member 1 (Phldb1), mRNA [NM_001191578]                                                                                         | 25,379 |
| Pcdhga1    | Rattus norvegicus protocadherin gamma subfamily A, 1 (Pcdhga1), mRNA [NM_001037140]                                                                                                         | 25,374 |
| 0          | YG01_MOUSE (Q9CQB7) LYR family protein A-211C6.1 homolog, partial (31%) [TC592130]                                                                                                          | 25,373 |
| Abcc9      | Rattus norvegicus ATP-binding cassette, subfamily C (CFTR/MRP), member 9 (Abcc9), mRNA [NM_013040]                                                                                          | 25,354 |
| Kif18b     | Rattus norvegicus kinesin family member 18B (Kif18b), mRNA [NM_001039019]                                                                                                                   | 25,349 |
| Diablo     | Rattus norvegicus diablo homolog (Drosophila) (Diablo), nuclear gene encoding mitochondrial protein, mRNA [NM_001008292]                                                                    | 25,348 |
| Maz        | Rattus norvegicus MYC-associated zinc finger protein (purine-binding transcription factor) (Maz), mRNA [NM_001110319]                                                                       | 25,342 |
| Mier1      | Rattus norvegicus mesoderm induction early response 1 homolog (Xenopus laevis) (Mier1), mRNA [NM_001131012]                                                                                 | 25,329 |
| Mansc1     | Rattus norvegicus MANSC domain containing 1 (Mansc1), mRNA [NM_001109603]                                                                                                                   | 25,323 |
| Insl3      | Rattus norvegicus insulin-like 3 (Insl3), mRNA [NM_053680]                                                                                                                                  | 25,316 |
| Trim16     | Rattus norvegicus tripartite motif-containing 16 (Trim16), mRNA [NM_001135033]                                                                                                              | 25,305 |
| Grm5       | Rattus norvegicus glutamate receptor, metabotropic 5 (Grm5), mRNA [NM_017012]                                                                                                               | 25,304 |
| Rab14      | Rattus norvegicus RAB, member of RAS oncogene family-like 4 (Rab14), mRNA [NM_001130495]                                                                                                    | 25,301 |
| Timp4      | Rattus norvegicus tissue inhibitor of metalloproteinase 4 (Timp4), mRNA [NM_001109393]                                                                                                      | 25,298 |
| Wbscr17    | Rattus norvegicus Williams-Beuren syndrome chromosome region 17 homolog (human) (Wbscr17), mRNA [NM_001025112]                                                                              | 25,287 |
| RGD1566130 | Rattus norvegicus similar to mKIAA1940 protein (RGD1566130), mRNA [NM_001107871]                                                                                                            | 25,286 |
| 0          | Unknown                                                                                                                                                                                     | 25,281 |
| Slc12a6    | Rattus norvegicus solute carrier family 12, member 6 (Slc12a6), mRNA [NM_001109630]                                                                                                         | 25,275 |
| Adam19     | Rattus norvegicus a disintegrin and metallopeptidase domain 19 (meltrin beta) (Adam19), mRNA [NM_001160228]                                                                                 | 25,257 |
| Sema5a     | Rattus norvegicus sema domain, seven thrombospondin repeats (type 1 and type 1-like), transmembrane domain (TM) and short cytoplasmic domain, (semaphorin) 5A (Sema5a), mRNA [NM_001107659] | 25,257 |
| Bcr        | PREDICTED: Rattus norvegicus breakpoint cluster region (Bcr), mRNA [XM_228091]                                                                                                              | 25,241 |
| Acox1      | Rattus norvegicus acyl-Coenzyme A oxidase 1, palmitoyl (Acox1), mRNA [NM_017340]                                                                                                            | 25,234 |
| 0          | Unknown                                                                                                                                                                                     | 25,231 |
| Ints3      | Uncharacterized protein [Source:UniProtKB/TrEMBL;Acc:D3ZAI3] [ENSRNOT00000020575]                                                                                                           | 25,208 |
| Adra2b     | Rattus norvegicus adrenergic, alpha-2B-, receptor (Adra2b), mRNA [NM_138505]                                                                                                                | 25,194 |
| Casc3      | Rattus norvegicus cancer susceptibility candidate 3 (Casc3), mRNA [NM_147144]                                                                                                               | 25,192 |
| Nhlrc1     | Rattus norvegicus NHL repeat containing 1 (Nhlrc1), mRNA [NM_199236]                                                                                                                        | 25,184 |
| 0          | Rattus norvegicus TL0AAA50YL16 mRNA sequence. [FQ212907]                                                                                                                                    | 25,180 |

|              |                                                                                                                                                                    |               |
|--------------|--------------------------------------------------------------------------------------------------------------------------------------------------------------------|---------------|
| RGD1559508   | PREDICTED: Rattus norvegicus similar to hypothetical protein 4930474N05 (RGD1559508), mRNA [XM_577489]                                                             | <b>25,172</b> |
| Slc25a30     | Rattus norvegicus solute carrier family 25, member 30 (Slc25a30), nuclear gene encoding mitochondrial protein, mRNA [NM_001013187]                                 | <b>25,155</b> |
| Fchsd1       | Rattus norvegicus FCH and double SH3 domains 1 (Fchsd1), transcript variant 2, mRNA [NM_001107392]                                                                 | <b>25,152</b> |
| Dhh          | Rattus norvegicus desert hedgehog homolog (Drosophila) (Dhh), mRNA [NM_053367]                                                                                     | <b>25,144</b> |
| Wasl         | Rattus norvegicus Wiskott-Aldrich syndrome-like (Wasl), mRNA [NM_001110365]                                                                                        | <b>25,133</b> |
| rnf141       | Rattus norvegicus ring finger protein 141 (rnf141), mRNA [NM_001001800]                                                                                            | <b>25,127</b> |
| Stampbp      | Rattus norvegicus Stam binding protein (Stampbp), mRNA [NM_138531]                                                                                                 | <b>25,114</b> |
| Tmc1         | Rattus norvegicus transmembrane channel-like 1 (Tmc1), mRNA [NM_001108521]                                                                                         | <b>25,106</b> |
| Igsf11       | Rattus norvegicus immunoglobulin superfamily, member 11 (Igsf11), mRNA [NM_001013120]                                                                              | <b>25,105</b> |
| 0            | transient receptor potential cation channel subfamily M member 3 [Source:RefSeq peptide;Acc:NP_001178491] [ENSRNOT00000017755]                                     | <b>25,105</b> |
| Pacsin2      | Rattus norvegicus protein kinase C and casein kinase substrate in neurons 2 (Pacsin2), mRNA [NM_130740]                                                            | <b>25,102</b> |
| Fezf2        | Rattus norvegicus Fez family zinc finger 2 (Fezf2), mRNA [NM_001107251]                                                                                            | <b>25,102</b> |
| Rab2b        | Rattus norvegicus RAB2B, member RAS oncogene family (Rab2b), mRNA [NM_001037645]                                                                                   | <b>25,090</b> |
| Irgq         | Rattus norvegicus immunity-related GTPase family, Q (Irgq), mRNA [NM_001135742]                                                                                    | <b>25,086</b> |
| 0            | Unknown                                                                                                                                                            | <b>25,085</b> |
| Furin        | Rattus norvegicus furin (paired basic amino acid cleaving enzyme) (Furin), mRNA [NM_019331]                                                                        | <b>25,083</b> |
| RGD1566107   | Rattus norvegicus similar to cAMP responsive element binding protein 5 (RGD1566107), mRNA [NM_001134621]                                                           | <b>25,081</b> |
| Ywhae        | Rattus norvegicus tyrosine 3-monooxygenase/tryptophan 5-monooxygenase activation protein, epsilon polypeptide (Ywhae), mRNA [NM_031603]                            | <b>25,075</b> |
| Arhgap1      | Rattus norvegicus Rho GTPase activating protein 1 (Arhgap1), mRNA [NM_001107747]                                                                                   | <b>25,073</b> |
| 0            | Unknown                                                                                                                                                            | <b>25,051</b> |
| RGD1562091   | Rattus norvegicus similar to expressed sequence C79127 (RGD1562091), mRNA [NM_001106231]                                                                           | <b>25,037</b> |
| Man2a1       | Rattus norvegicus mannosidase, alpha, class 2A, member 1 (Man2a1), mRNA [NM_012979]                                                                                | <b>25,034</b> |
| RGD1565496   | Rattus norvegicus similar to Butyrate-induced transcript 1 (RGD1565496), mRNA [NM_001106831]                                                                       | <b>25,033</b> |
| Tor1aip2     | Rattus norvegicus torsin A interacting protein 2 (Tor1aip2), transcript variant 1, mRNA [NM_199100]                                                                | <b>25,002</b> |
| RGD1560884   | Rattus norvegicus similar to myosin tail domain-containing protein (RGD1560884), mRNA [NM_001134641]                                                               | <b>24,998</b> |
| Ccna2        | Rattus norvegicus cyclin A2 (Ccna2), mRNA [NM_053702]                                                                                                              | <b>24,994</b> |
| LOC100365745 | PREDICTED: Rattus norvegicus hypothetical protein LOC100365745 (LOC100365745), mRNA [XM_002725938]                                                                 | <b>24,984</b> |
| LOC687796    | PREDICTED: Rattus norvegicus hypothetical protein LOC687796, transcript variant 2 (LOC687796), mRNA [XM_001078497]                                                 | <b>24,984</b> |
| RGD1306502   | Rattus norvegicus similar to hypothetical protein FLJ11193 (RGD1306502), mRNA [NM_001107654]                                                                       | <b>24,983</b> |
| Timp3        | Rattus norvegicus TIMP metallopeptidase inhibitor 3 (Timp3), mRNA [NM_012886]                                                                                      | <b>24,964</b> |
| Rics         | PREDICTED: Rattus norvegicus Rho GTPase-activating protein (Rics), mRNA [XM_001056872]                                                                             | <b>24,959</b> |
| Rarg         | Rattus norvegicus retinoic acid receptor, gamma (Rarg), transcript variant 1, mRNA [NM_001135249]                                                                  | <b>24,952</b> |
| LOC681825    | PREDICTED: Rattus norvegicus similar to Prefoldin subunit 3 (Von Hippel-Lindau-binding protein 1) (VHL-binding protein 1) (VBP-1) (LOC681825), mRNA [XM_001058594] | <b>24,951</b> |

|              |                                                                                                                                        |               |
|--------------|----------------------------------------------------------------------------------------------------------------------------------------|---------------|
| Ctdspl       | Rattus norvegicus CTD (carboxy-terminal domain, RNA polymerase II, polypeptide A) small phosphatase-like (Ctdspl), mRNA [NM_001106865] | <b>24,945</b> |
| Cacna1e      | Rattus norvegicus calcium channel, voltage-dependent, R type, alpha 1E subunit (Cacna1e), mRNA [NM_019294]                             | <b>24,945</b> |
| Zfp469       | Rattus norvegicus zinc finger protein 469 (Zfp469), mRNA [NM_001107123]                                                                | <b>24,942</b> |
| Pde6d        | Rattus norvegicus phosphodiesterase 6D, cGMP-specific, rod, delta (Pde6d), mRNA [NM_001108806]                                         | <b>24,941</b> |
| siat7D       | PREDICTED: Rattus norvegicus alpha-2,6-sialyltransferase ST6GalNAc IV (siat7D), mRNA [XM_001080040]                                    | <b>24,930</b> |
| Rbks         | Rattus norvegicus ribokinase (Rbks), mRNA [NM_001108703]                                                                               | <b>24,930</b> |
| LOC100192313 | Rattus norvegicus hypothetical protein LOC100192313 (LOC100192313), mRNA [NM_001136261]                                                | <b>24,919</b> |
| Psenen       | Rattus norvegicus presenilin enhancer 2 homolog (C. elegans) (Psenen), mRNA [NM_001008764]                                             | <b>24,912</b> |
| Il34         | Rattus norvegicus interleukin 34 (Il34), mRNA [NM_001025766]                                                                           | <b>24,908</b> |
| Smtn         | Rattus norvegicus smoothelin (Smtn), mRNA [NM_001013049]                                                                               | <b>24,904</b> |
| 0            | DRNBTB09 Rat DRG Library Rattus norvegicus cDNA clone DRNBTB09 5', mRNA sequence [BG673348]                                            | <b>24,904</b> |
| Sdc2         | Syndecan-2 [Source:UniProtKB/Swiss-Prot;Acc:P34900] [ENSRNOT00000007255]                                                               | <b>24,896</b> |
| Hrk          | Rattus norvegicus harakiri, BCL2 interacting protein (contains only BH3 domain) (Hrk), mRNA [NM_057130]                                | <b>24,891</b> |
| 0            | Unknown                                                                                                                                | <b>24,889</b> |
| Spg21        | Rattus norvegicus spastic paraplegia 21 homolog (human) (Spg21), mRNA [NM_001006987]                                                   | <b>24,876</b> |
| RGD1310945   | PREDICTED: Rattus norvegicus similar to hypothetical protein FLJ23305 (RGD1310945), mRNA [XM_001065531]                                | <b>24,875</b> |
| Nlrp1b       | PREDICTED: Rattus norvegicus similar to NACHT, leucine rich repeat and PYD containing 1 (LOC691998), mRNA [XM_001080760]               | <b>24,874</b> |
| 0            | Unknown                                                                                                                                | <b>24,853</b> |
| Pla2g7       | Rattus norvegicus phospholipase A2, group VII (platelet-activating factor acetylhydrolase, plasma) (Pla2g7), mRNA [NM_001009353]       | <b>24,849</b> |
| 0            | motile sperm domain-containing protein 2 [Source:RefSeq peptide;Acc:NP_001128060] [ENSRNOT00000004533]                                 | <b>24,848</b> |
| Rell2        | Rattus norvegicus RELT-like 2 (Rell2), mRNA [NM_001014149]                                                                             | <b>24,846</b> |
| 0            | RVL7467 Wackym-Soares normalized rat vestibular cDNA library Rattus norvegicus cDNA 5', mRNA sequence [DV717012]                       | <b>24,840</b> |
| Tfb1m        | Rattus norvegicus transcription factor B1, mitochondrial (Tfb1m), nuclear gene encoding mitochondrial protein, mRNA [NM_181474]        | <b>24,838</b> |
| Brd4         | Rattus norvegicus bromodomain containing 4 (Brd4), mRNA [NM_001100903]                                                                 | <b>24,827</b> |
| Ppp3cb       | Rattus norvegicus protein phosphatase 3, catalytic subunit, beta isoform (Ppp3cb), mRNA [NM_017042]                                    | <b>24,827</b> |
| Gp1bb        | Rattus norvegicus glycoprotein Ib (platelet), beta polypeptide (Gp1bb), mRNA [NM_053930]                                               | <b>24,822</b> |
| Sos2         | Rattus norvegicus son of sevenless homolog 2 (Drosophila) (Sos2), mRNA [NM_001135561]                                                  | <b>24,805</b> |
| Ap2b1        | Rattus norvegicus adaptor-related protein complex 2, beta 1 subunit (Ap2b1), mRNA [NM_080583]                                          | <b>24,803</b> |
| Zmat5        | Uncharacterized protein [Source:UniProtKB/TrEMBL;Acc:D3ZLD2] [ENSRNOT00000010332]                                                      | <b>24,794</b> |
| RGD1308448   | Rattus norvegicus similar to RIKEN cDNA B130016O10 gene (RGD1308448), mRNA [NM_001107671]                                              | <b>24,780</b> |
| 38596        | Rattus norvegicus septin 5 (Sept5), mRNA [NM_053931]                                                                                   | <b>24,780</b> |
| Ppy          | Rattus norvegicus pancreatic polypeptide (Ppy), mRNA [NM_012626]                                                                       | <b>24,771</b> |
| Saps1        | Rattus norvegicus SAPS domain family, member 1 (Saps1), mRNA [NM_001135849]                                                            | <b>24,769</b> |
| Rhd          | Rattus norvegicus Rh blood group, D antigen (Rhd), mRNA [NM_022505]                                                                    | <b>24,766</b> |



|            |                                                                                                                   |               |
|------------|-------------------------------------------------------------------------------------------------------------------|---------------|
| Parm1      | Rattus norvegicus prostate androgen-regulated mucin-like protein 1 (Parm1), mRNA [NM_173114]                      | <b>24,758</b> |
| 0          | gene regulated by estrogen in breast cancer protein Gene [Source:MGI Symbol;Acc:MGI:2149712] [ENSRNOT00000032417] | <b>24,747</b> |
| Ghr        | Rattus norvegicus growth hormone receptor (Ghr), mRNA [NM_017094]                                                 | <b>24,744</b> |
| Drg2       | Uncharacterized protein [Source:UniProtKB/TrEMBL;Acc:D3ZDC1] [ENSRNOT00000005101]                                 | <b>24,744</b> |
| Dag1       | PREDICTED: Rattus norvegicus dystroglycan 1 (dystrophin-associated glycoprotein 1) (Dag1), mRNA [XM_001074892]    | <b>24,735</b> |
| Ltbp4      | Rattus norvegicus latent transforming growth factor beta binding protein 4 (Ltbp4), mRNA [NM_001170336]           | <b>24,732</b> |
| Pdpx       | Rattus norvegicus pyridoxal (pyridoxine, vitamin B6) phosphatase (Pdpx), mRNA [NM_001135819]                      | <b>24,722</b> |
| Numb       | Rattus norvegicus numb homolog (Drosophila) (Numb), mRNA [NM_133287]                                              | <b>24,721</b> |
| Tnk2       | Rattus norvegicus tyrosine kinase, non-receptor, 2 (Tnk2), mRNA [NM_001008336]                                    | <b>24,716</b> |
| RGD1305415 | Uncharacterized protein [Source:UniProtKB/TrEMBL;Acc:D3ZQL6] [ENSRNOT00000036357]                                 | <b>24,713</b> |
| Tbccd1     | Rattus norvegicus TBCC domain containing 1 (Tbccd1), mRNA [NM_001012016]                                          | <b>24,705</b> |
| 0          | Unknown                                                                                                           | <b>24,702</b> |
| Pcdhga12   | Rattus norvegicus protocadherin gamma subfamily A, 12 (Pcdhga12), mRNA [NM_001037337]                             | <b>24,696</b> |
| Cdca3      | Rattus norvegicus cell division cycle associated 3 (Cdca3), mRNA [NM_001007648]                                   | <b>24,688</b> |
| Fxyd6      | Rattus norvegicus FXD domain-containing ion transport regulator 6 (Fxyd6), mRNA [NM_022005]                       | <b>24,682</b> |
| 0          | Unknown                                                                                                           | <b>24,673</b> |
| Slc35e3    | Rattus norvegicus solute carrier family 35, member E3 (Slc35e3), mRNA [NM_001134687]                              | <b>24,673</b> |
| 0          | Rattus norvegicus, 23 clones, strain BN/SsNHsdMCW RNOR03327679, whole genome shotgun sequence [AABR03128084]      | <b>24,668</b> |
| Dpf2       | Rattus norvegicus D4, zinc and double PHD fingers family 2 (Dpf2), mRNA [NM_001108516]                            | <b>24,655</b> |
| 0          | Unknown                                                                                                           | <b>24,653</b> |
| Pycr1      | Rattus norvegicus pyrroline-5-carboxylate reductase 1 (Pycr1), mRNA [NM_001105857]                                | <b>24,649</b> |
| Tnk2       | Rattus norvegicus tyrosine kinase, non-receptor, 2 (Tnk2), mRNA [NM_001008336]                                    | <b>24,648</b> |
| Zfp317     | Rattus norvegicus zinc finger protein 317 (Zfp317), mRNA [NM_001134634]                                           | <b>24,638</b> |
| 0          | Unknown                                                                                                           | <b>24,635</b> |
| Cdc23      | Rattus norvegicus CDC23 (cell division cycle 23, yeast, homolog) (Cdc23), mRNA [NM_001100659]                     | <b>24,626</b> |
| Ndufa3     | PREDICTED: Rattus norvegicus NADH dehydrogenase (ubiquinone) 1 alpha subcomplex, 3 (Ndufa3), mRNA [XM_001076462]  | <b>24,623</b> |
| Ankmy2     | Rattus norvegicus ankyrin repeat and MYND domain containing 2 (Ankmy2), mRNA [NM_001108019]                       | <b>24,615</b> |
| Rbm38      | Rattus norvegicus RNA binding motif protein 38 (Rbm38), mRNA [NM_001108965]                                       | <b>24,609</b> |
| LRRTM1     | Rattus norvegicus leucine rich repeat transmembrane neuronal 1 (LRRTM1), mRNA [NM_001109374]                      | <b>24,608</b> |
| Rerg       | RERG_HUMAN (Q96A58) Ras-related and estrogen-regulated growth inhibitor, partial (19%) [TC629838]                 | <b>24,603</b> |
| Olr575     | Rattus norvegicus olfactory receptor 575 (Olr575), mRNA [NM_001000327]                                            | <b>24,600</b> |
| Rfk        | Rattus norvegicus riboflavin kinase (Rfk), mRNA [NM_001014106]                                                    | <b>24,587</b> |
| Tmcc1      | Uncharacterized protein [Source:UniProtKB/TrEMBL;Acc:D3ZH14] [ENSRNOT00000042418]                                 | <b>24,583</b> |
| Lrp3       | Rattus norvegicus low density lipoprotein receptor-related protein 3 (Lrp3), mRNA [NM_053541]                     | <b>24,582</b> |

|            |                                                                                                                   |               |
|------------|-------------------------------------------------------------------------------------------------------------------|---------------|
| Lrp10      | Rattus norvegicus low-density lipoprotein receptor-related protein 10 (Lrp10), mRNA [NM_001037777]                | <b>24,580</b> |
| Nploc4     | Rattus norvegicus nuclear protein localization 4 homolog (S. cerevisiae) (Nploc4), mRNA [NM_080577]               | <b>24,573</b> |
| 0          | Unknown                                                                                                           | <b>24,570</b> |
| 0          | Unknown                                                                                                           | <b>24,551</b> |
| Araf       | Rattus norvegicus v-raf murine sarcoma 3611 viral oncogene homolog (Araf), transcript variant 1, mRNA [NM_022532] | <b>24,547</b> |
| 0          | forkhead box protein K2 [Source:RefSeq peptide;Acc:NP_001100545] [ENSRNOT00000068086]                             | <b>24,541</b> |
| 0          | Histone H2B type 1 [Source:UniProtKB/Swiss-Prot;Acc:Q00715] [ENSRNOT00000024276]                                  | <b>24,534</b> |
| Gad2       | Rattus norvegicus glutamate decarboxylase 2 (Gad2), mRNA [NM_012563]                                              | <b>24,520</b> |
| Olr1105    | Rattus norvegicus olfactory receptor 1105 (Olr1105), mRNA [NM_001001078]                                          | <b>24,516</b> |
| Fam101b    | Rattus norvegicus family with sequence similarity 101, member B (Fam101b), mRNA [NM_001007611]                    | <b>24,511</b> |
| Tcf12      | Rattus norvegicus transcription factor 12 (Tcf12), mRNA [NM_013176]                                               | <b>24,500</b> |
| Etv1       | Rattus norvegicus ets variant 1 (Etv1), transcript variant 1, mRNA [NM_001163156]                                 | <b>24,472</b> |
| Ddx19b     | Rattus norvegicus DEAD (Asp-Glu-Ala-As) box polypeptide 19B (Ddx19b), mRNA [NM_001005895]                         | <b>24,466</b> |
| E2f3       | Rattus norvegicus E2F transcription factor 3 (E2f3), mRNA [NM_001137626]                                          | <b>24,458</b> |
| 38047      | Uncharacterized protein [Source:UniProtKB/TrEMBL;Acc:D3ZNC9] [ENSRNOT00000022076]                                 | <b>24,452</b> |
| Mast2      | Rattus norvegicus microtubule associated serine/threonine kinase 2 (Mast2), mRNA [NM_001108005]                   | <b>24,451</b> |
| Slc18a3    | Rattus norvegicus solute carrier family 18 (vesicular acetylcholine), member 3 (Slc18a3), mRNA [NM_031663]        | <b>24,447</b> |
| 0          | Unknown                                                                                                           | <b>24,441</b> |
| Ankrd29    | Rattus norvegicus ankyrin repeat domain 29 (Ankrd29), mRNA [NM_001190372]                                         | <b>24,440</b> |
| Asb8       | Rattus norvegicus ankyrin repeat and SOCS box-containing 8 (Asb8), mRNA [NM_001108109]                            | <b>24,433</b> |
| Gpr115     | Uncharacterized protein [Source:UniProtKB/TrEMBL;Acc:D3ZTY4] [ENSRNOT00000016906]                                 | <b>24,433</b> |
| RGD1564961 | PREDICTED: Rattus norvegicus similar to retinoblastoma-binding protein 1 isoform I (RGD1564961), mRNA [XM_226650] | <b>24,431</b> |
| Nr4a3      | Rattus norvegicus nuclear receptor subfamily 4, group A, member 3 (Nr4a3), transcript variant 1, mRNA [NM_031628] | <b>24,424</b> |
| Uts2       | Rattus norvegicus urotensin 2 (Uts2), mRNA [NM_019160]                                                            | <b>24,416</b> |
| 0          | Unknown                                                                                                           | <b>24,413</b> |
| 0          | Unknown                                                                                                           | <b>24,409</b> |
| lws1       | Rattus norvegicus IWS1 homolog (S. cerevisiae) (lws1), mRNA [NM_001034918]                                        | <b>24,408</b> |
| Ntan1      | Rattus norvegicus N-terminal asparagine amidase (Ntan1), mRNA [NM_001025124]                                      | <b>24,404</b> |
| Nckap5l    | Uncharacterized protein [Source:UniProtKB/TrEMBL;Acc:D3Z9A7] [ENSRNOT00000022937]                                 | <b>24,397</b> |
| LOC689065  | Rattus norvegicus hypothetical protein LOC689065 (LOC689065), mRNA [NM_001109521]                                 | <b>24,391</b> |
| RGD1308106 | Rattus norvegicus LOC361719 (RGD1308106), mRNA [NM_001134575]                                                     | <b>24,378</b> |
| Stk24      | Rattus norvegicus TL0AEA11YD24 mRNA sequence. [FQ227921]                                                          | <b>24,378</b> |
| Pogz       | Rattus norvegicus pogo transposable element with ZNF domain (Pogz), mRNA [NM_001107693]                           | <b>24,375</b> |
| Fam110b    | Rattus norvegicus family with sequence similarity 110, member B (Fam110b), mRNA [NM_001024341]                    | <b>24,367</b> |

|            |                                                                                                                                                           |               |
|------------|-----------------------------------------------------------------------------------------------------------------------------------------------------------|---------------|
| Map6d1     | Rattus norvegicus MAP6 domain containing 1 (Map6d1), mRNA [NM_001108844]                                                                                  | <b>24,360</b> |
| 0          | Rattus norvegicus chromosome 10, 11 clones, strain BN/SsNHsdMCW RNOR03214576, whole genome shotgun sequence [AABR03073588]                                | <b>24,343</b> |
| 0          | Unknown                                                                                                                                                   | <b>24,328</b> |
| Map1lc3a   | Rattus norvegicus microtubule-associated protein 1 light chain 3 alpha (Map1lc3a), mRNA [NM_199500]                                                       | <b>24,327</b> |
| Casq1      | Rattus norvegicus calsequestrin 1 (fast-twitch, skeletal muscle) (Casq1), nuclear gene encoding mitochondrial protein, mRNA [NM_001159594]                | <b>24,326</b> |
| Nkiras1    | Rattus norvegicus NFkB inhibitor interacting Ras-like 1 (Nkiras1), mRNA [NM_001107252]                                                                    | <b>24,321</b> |
| Rab10      | Rattus norvegicus RAB10, member RAS oncogene family (Rab10), mRNA [NM_017359]                                                                             | <b>24,316</b> |
| Zbtb4      | PREDICTED: Rattus norvegicus zinc finger and BTB domain containing 4 (Zbtb4), mRNA [XM_001079524]                                                         | <b>24,314</b> |
| Scamp3     | Rattus norvegicus secretory carrier membrane protein 3 (Scamp3), mRNA [NM_031724]                                                                         | <b>24,308</b> |
| Slc1a3     | Rattus norvegicus solute carrier family 1 (glial high affinity glutamate transporter), member 3 (Slc1a3), mRNA [NM_019225]                                | <b>24,300</b> |
| Ctrl       | Rattus norvegicus chymotrypsin-like (Ctrl), mRNA [NM_054009]                                                                                              | <b>24,298</b> |
| Slc17a5    | Rattus norvegicus solute carrier family 17 (anion/sugar transporter), member 5 (Slc17a5), mRNA [NM_001009713]                                             | <b>24,297</b> |
| Pak6       | Rattus norvegicus p21 protein (Cdc42/Rac)-activated kinase 6 (Pak6), mRNA [NM_001106498]                                                                  | <b>24,297</b> |
| Ctnnd2     | PREDICTED: Rattus norvegicus catenin (cadherin-associated protein), delta 2 (neural plakophilin-related arm-repeat protein) (Ctnnd2), mRNA [XM_001064375] | <b>24,294</b> |
| 0          | CB544633 AMGNNUC:SRPB2-00179-D4-A srpb2 (10220) Rattus norvegicus cDNA clone srpb2-00179-d4 5', mRNA sequence [CB544633]                                  | <b>24,291</b> |
| Drd5       | Rattus norvegicus dopamine receptor D5 (Drd5), mRNA [NM_012768]                                                                                           | <b>24,290</b> |
| Ankib1     | Rattus norvegicus ankyrin repeat and IBR domain containing 1 (Ankib1), mRNA [NM_001134781]                                                                | <b>24,286</b> |
| Chm        | Rattus norvegicus choroideremia (Rab escort protein 1) (Chm), mRNA [NM_017067]                                                                            | <b>24,283</b> |
| Sirpa      | Rattus norvegicus signal-regulatory protein alpha (Sirpa), mRNA [NM_013016]                                                                               | <b>24,283</b> |
| Mansc1     | Rattus norvegicus MANSOC domain containing 1 (Mansc1), mRNA [NM_001109603]                                                                                | <b>24,278</b> |
| Baiap2     | Rattus norvegicus BAI1-associated protein 2 (Baiap2), mRNA [NM_057196]                                                                                    | <b>24,277</b> |
| LOC688267  | PREDICTED: Rattus norvegicus hypothetical protein LOC688267 (LOC688267), mRNA [XM_002742439]                                                              | <b>24,277</b> |
| LOC687399  | Rattus norvegicus hypothetical protein LOC687399 (LOC687399), mRNA [NM_001101015]                                                                         | <b>24,274</b> |
| RGD1309870 | Rattus norvegicus hypothetical LOC289778 (RGD1309870), mRNA [NM_001106018]                                                                                | <b>24,272</b> |
| 0          | Unknown                                                                                                                                                   | <b>24,267</b> |
| 0          | Transcriptional regulator ATRX [Source:UniProtKB/Swiss-Prot;Acc:P70486] [ENSRNOT00000033355]                                                              | <b>24,265</b> |
| 0          | Rattus norvegicus similar to DAZ-associated protein 1 (LOC309292), mRNA [XM_219766]                                                                       | <b>24,257</b> |
| Rad54l2    | Rattus norvegicus Rad54 like 2 (S. cerevisiae) (Rad54l2), mRNA [NM_001134520]                                                                             | <b>24,253</b> |
| Dusp19     | Rattus norvegicus dual specificity phosphatase 19 (Dusp19), mRNA [NM_001107739]                                                                           | <b>24,250</b> |
| Nek8       | Rattus norvegicus NIMA (never in mitosis gene a)- related kinase 8 (Nek8), mRNA [NM_001105804]                                                            | <b>24,242</b> |
| St8sia3    | Rattus norvegicus ST8 alpha-N-acetylneuraminide alpha-2,8-sialyltransferase 3 (St8sia3), mRNA [NM_013029]                                                 | <b>24,242</b> |
| Onecut1    | Rattus norvegicus one cut homeobox 1 (Onecut1), mRNA [NM_022671]                                                                                          | <b>24,236</b> |
| Cpne5      | Rattus norvegicus copine V (Cpne5), mRNA [NM_001107616]                                                                                                   | <b>24,232</b> |

|            |                                                                                                                    |        |
|------------|--------------------------------------------------------------------------------------------------------------------|--------|
| 0          | Unknown                                                                                                            | 24,223 |
| Rpl711     | PREDICTED: Rattus norvegicus ribosomal protein L7-like 1 (Rpl711), mRNA [XM_001065509]                             | 24,220 |
| Erlin1     | Rattus norvegicus ER lipid raft associated 1 (Erlin1), mRNA [NM_001106353]                                         | 24,209 |
| Xk         | Rattus norvegicus X-linked Kx blood group (McLeod syndrome) homolog (Xk), mRNA [NM_001012227]                      | 24,208 |
| Ccnd1      | Rattus norvegicus cyclin D1 (Ccnd1), mRNA [NM_171992]                                                              | 24,208 |
| Ngf        | PREDICTED: Rattus norvegicus nerve growth factor (beta polypeptide) (Ngf), partial mRNA [XM_001067130]             | 24,205 |
| Myo1d      | Rattus norvegicus myosin ID (Myo1d), mRNA [NM_012983]                                                              | 24,203 |
| Unc5c      | Rattus norvegicus unc-5 homolog C (C. elegans) (Unc5c), mRNA [NM_199407]                                           | 24,202 |
| Zfp799     | Rattus norvegicus zinc finger protein 799 (Zfp799), mRNA [NM_001009537]                                            | 24,190 |
| Tnfsf13    | Rattus norvegicus tumor necrosis factor (ligand) superfamily, member 13 (Tnfsf13), mRNA [NM_001009623]             | 24,181 |
| Il1r2      | Rattus norvegicus interleukin 1 receptor, type II (Il1r2), mRNA [NM_053953]                                        | 24,176 |
| Map2       | Rattus norvegicus microtubule-associated protein 2 (Map2), mRNA [NM_013066]                                        | 24,166 |
| RGD1308601 | Rattus norvegicus similar to hypothetical protein (RGD1308601), mRNA [NM_001107374]                                | 24,165 |
| Epb4111    | Rattus norvegicus erythrocyte membrane protein band 4.1-like 1 (Epb4111), transcript variant 2, mRNA [NM_021681]   | 24,159 |
| Shoc2      | Rattus norvegicus soc-2 (suppressor of clear) homolog (C. elegans) (Shoc2), mRNA [NM_001013155]                    | 24,159 |
| Lmf2       | Rattus norvegicus lipase maturation factor 2 (Lmf2), mRNA [NM_001079939]                                           | 24,159 |
| Lcn2       | Rattus norvegicus lipocalin 2 (Lcn2), mRNA [NM_130741]                                                             | 24,158 |
| 0          | Rattus norvegicus similar to 40S ribosomal protein S8 (LOC302393), mRNA [XM_228533]                                | 24,151 |
| Atxn1l     | Uncharacterized protein [Source:UniProtKB/TrEMBL;Acc:D3ZBC4] [ENSRNOT00000059225]                                  | 24,148 |
| 0          | Angiomotin-like 1 (Predicted)Uncharacterized protein [Source:UniProtKB/TrEMBL;Acc:D3ZK60] [ENSRNOT00000011955]     | 24,147 |
| Myadm      | Rattus norvegicus myeloid-associated differentiation marker (Myadm), mRNA [NM_183332]                              | 24,137 |
| LOC500392  | Rattus norvegicus similar to hypothetical protein FLJ25692 (LOC500392), mRNA [NM_001024340]                        | 24,134 |
| Pygo2      | Rattus norvegicus pygopus 2 (Pygo2), mRNA [NM_001106447]                                                           | 24,129 |
| 0          | Unknown                                                                                                            | 24,118 |
| RGD1309762 | PREDICTED: Rattus norvegicus similar to KIAA0614 protein (RGD1309762), mRNA [XM_222205]                            | 24,111 |
| Aco2       | Rattus norvegicus aconitase 2, mitochondrial (Aco2), nuclear gene encoding mitochondrial protein, mRNA [NM_024398] | 24,101 |
| Nol3       | Rattus norvegicus nucleolar protein 3 (apoptosis repressor with CARD domain) (Nol3), mRNA [NM_053516]              | 24,100 |
| Myst3      | Rattus norvegicus MYST histone acetyltransferase (monocytic leukemia) 3 (Myst3), mRNA [NM_001100570]               | 24,098 |
| Mapk6      | Rattus norvegicus mitogen-activated protein kinase 6 (Mapk6), mRNA [NM_031622]                                     | 24,087 |
| Tmem38a    | Rattus norvegicus transmembrane protein 38a (Tmem38a), mRNA [NM_001100175]                                         | 24,086 |
| Tspan2     | Rattus norvegicus tetraspanin 2 (Tspan2), mRNA [NM_022589]                                                         | 24,085 |
| Sfrs3      | Rattus norvegicus splicing factor, arginine/serine-rich 3 (Sfrs3), mRNA [NM_001047907]                             | 24,083 |
| Ankrd12    | Rattus norvegicus ankyrin repeat domain 12 (Ankrd12), mRNA [NM_001108238]                                          | 24,081 |
| LOC298139  | Rattus norvegicus similar to RIKEN cDNA 2310003M01 (LOC298139), mRNA [NM_001013930]                                | 24,076 |

|           |                                                                                                                                    |        |
|-----------|------------------------------------------------------------------------------------------------------------------------------------|--------|
| Alkbh     | Rattus norvegicus alkB, alkylation repair homolog (E. coli) (Alkbh), mRNA [NM_001108718]                                           | 24,070 |
| 0         | Unknown                                                                                                                            | 24,057 |
| Bcas3     | Rattus norvegicus breast carcinoma amplified sequence 3 (Bcas3), mRNA [NM_001173430]                                               | 24,055 |
| Atf2      | Rattus norvegicus activating transcription factor 2 (Atf2), mRNA [NM_031018]                                                       | 24,050 |
| Ssr3      | Rattus norvegicus signal sequence receptor, gamma (Ssr3), mRNA [NM_031120]                                                         | 24,046 |
| 0         | Unknown                                                                                                                            | 24,044 |
| 0         | Unknown                                                                                                                            | 24,038 |
| Ndufb4l1  | Uncharacterized protein [Source:UniProtKB/TrEMBL;Acc:D3ZV29] [ENSRNOT00000044617]                                                  | 24,037 |
| 0         | Unknown                                                                                                                            | 24,023 |
| 0         | Nol6 protein [Source:UniProtKB/TrEMBL;Acc:B0BNB6] [ENSRNOT00000068046]                                                             | 24,003 |
| Tp53bp2   | PREDICTED: Rattus norvegicus tumor protein p53 binding protein, 2, transcript variant 1 (Tp53bp2), mRNA [XM_001063503]             | 24,000 |
| Ankrd55   | PREDICTED: Rattus norvegicus ankyrin repeat domain 55 (Ankrd55), mRNA [XM_342195]                                                  | 23,996 |
| Tom1l2    | Rattus norvegicus target of myb1-like 2 (chicken) (Tom1l2), mRNA [NM_001108277]                                                    | 23,992 |
| Pusl1     | Rattus norvegicus pseudouridylate synthase-like 1 (Pusl1), mRNA [NM_001108699]                                                     | 23,991 |
| Agfg1     | Rattus norvegicus ArfGAP with FG repeats 1 (Agfg1), mRNA [NM_001135596]                                                            | 23,979 |
| LOC500213 | PREDICTED: Rattus norvegicus similar to T-box transcription factor TBX15 (T-box protein 15) (MmTBx8) (LOC500213), mRNA [XM_575564] | 23,974 |
| Rab3d     | Rattus norvegicus RAB3D, member RAS oncogene family (Rab3d), mRNA [NM_080580]                                                      | 23,974 |
| Nos1      | Rattus norvegicus nitric oxide synthase 1, neuronal (Nos1), mRNA [NM_052799]                                                       | 23,958 |
| Cdk2      | Rattus norvegicus cyclin dependent kinase 2 (Cdk2), mRNA [NM_199501]                                                               | 23,949 |
| 0         | Unknown                                                                                                                            | 23,948 |
| Srrm2     | Uncharacterized protein [Source:UniProtKB/TrEMBL;Acc:D4AAC6] [ENSRNOT00000006370]                                                  | 23,948 |
| Foxj3     | Rattus norvegicus forkhead box J3 (Foxj3), mRNA [NM_001107971]                                                                     | 23,945 |
| Myoz3     | Synaptopodin [Source:UniProtKB/Swiss-Prot;Acc:Q9Z327] [ENSRNOT00000025989]                                                         | 23,945 |
| Ube2q1    | Rattus norvegicus ubiquitin-conjugating enzyme E2Q family-like 1 (Ube2q1), mRNA [NM_001145163]                                     | 23,942 |
| Mgll      | Rattus norvegicus monoglyceride lipase (Mgll), mRNA [NM_138502]                                                                    | 23,939 |
| Per1      | Rattus norvegicus period homolog 1 (Drosophila) (Per1), mRNA [NM_001034125]                                                        | 23,936 |
| Arl5b     | Rattus norvegicus ADP-ribosylation factor-like 5B (Arl5b), mRNA [NM_001015031]                                                     | 23,924 |
| LOC689939 | PREDICTED: Rattus norvegicus similar to KIAA0999 protein (LOC689939), mRNA [XM_001072611]                                          | 23,924 |
| Mybbp1a   | Rattus norvegicus MYB binding protein (P160) 1a (Mybbp1a), mRNA [NM_031668]                                                        | 23,913 |
| 0         | Q4SRM6_TETNG (Q4SRM6) Chromosome undetermined SCAF14516, whole genome shotgun sequence. (Fragment), partial (5%) [TC616541]        | 23,911 |
| Stradb    | Rattus norvegicus STE20-related kinase adaptor beta (Stradb), mRNA [NM_001109307]                                                  | 23,893 |
| Dusp7     | Dual specificity protein phosphatase 7 [Source:UniProtKB/Swiss-Prot;Acc:Q63340] [ENSRNOT00000014770]                               | 23,880 |
| Znhit1    | Uncharacterized protein [Source:UniProtKB/TrEMBL;Acc:D3ZNG9] [ENSRNOT00000001922]                                                  | 23,869 |
| Col27a1   | Rattus norvegicus collagen, type XXVII, alpha 1 (Col27a1), mRNA [NM_198747]                                                        | 23,856 |

|            |                                                                                                                                 |               |
|------------|---------------------------------------------------------------------------------------------------------------------------------|---------------|
| Phkg2      | Rattus norvegicus phosphorylase kinase, gamma 2 (testis) (Phkg2), mRNA [NM_080584]                                              | <b>23,846</b> |
| Stx16      | Rattus norvegicus syntaxin 16 (Stx16), mRNA [NM_001108610]                                                                      | <b>23,829</b> |
| Rgs7bp     | Rattus norvegicus regulator of G-protein signaling 7 binding protein (Rgs7bp), mRNA [NM_001012347]                              | <b>23,821</b> |
| Mfap3l     | Rattus norvegicus microfibrillar-associated protein 3-like (Mfap3l), mRNA [NM_001012049]                                        | <b>23,818</b> |
| Col20a1    | Uncharacterized protein [Source:UniProtKB/TrEMBL;Acc:D3ZII5] [ENSRNOT00000040270]                                               | <b>23,810</b> |
| Tpm4       | Rattus norvegicus tropomyosin 4 (Tpm4), mRNA [NM_012678]                                                                        | <b>23,808</b> |
| 0          | Unknown                                                                                                                         | <b>23,793</b> |
| Kcnma1     | Rattus norvegicus potassium large conductance calcium-activated channel, subfamily M, alpha member 1 (Kcnma1), mRNA [NM_031828] | <b>23,790</b> |
| Tmc4       | Rattus norvegicus transmembrane channel-like 4 (Tmc4), mRNA [NM_001034104]                                                      | <b>23,778</b> |
| Strn4      | Rattus norvegicus striatin, calmodulin binding protein 4 (Strn4), transcript variant 1, mRNA [NM_001107480]                     | <b>23,769</b> |
| Ocrl       | Rattus norvegicus oculocerebrorenal syndrome of Lowe (Ocrl), mRNA [NM_001108256]                                                | <b>23,765</b> |
| Xylt1      | Xylosyltransferase 1 [Source:UniProtKB/Swiss-Prot;Acc:Q9EPI1] [ENSRNOT00000025007]                                              | <b>23,763</b> |
| Drap1      | Rattus norvegicus Dr1 associated protein 1 (negative cofactor 2 alpha) (Drap1), mRNA [NM_001077668]                             | <b>23,762</b> |
| Sp1        | Rattus norvegicus Sp1 transcription factor (Sp1), mRNA [NM_012655]                                                              | <b>23,760</b> |
| LOC500726  | Uncharacterized protein [Source:UniProtKB/TrEMBL;Acc:D4A1G8] [ENSRNOT00000030246]                                               | <b>23,760</b> |
| 0          | Unknown                                                                                                                         | <b>23,758</b> |
| Arnt2      | Rattus norvegicus aryl hydrocarbon receptor nuclear translocator 2 (Arnt2), mRNA [NM_012781]                                    | <b>23,753</b> |
| RGD1311648 | Rattus norvegicus similar to hypothetical protein FLJ21820 (RGD1311648), mRNA [NM_001014075]                                    | <b>23,750</b> |
| Pou3f1     | Rattus norvegicus POU class 3 homeobox 1 (Pou3f1), mRNA [NM_138838]                                                             | <b>23,747</b> |
| Olr1366    | Rattus norvegicus olfactory receptor 1366 (Olr1366), mRNA [NM_001000980]                                                        | <b>23,742</b> |
| Usp48      | Rattus norvegicus ubiquitin specific peptidase 48 (Usp48), mRNA [NM_198785]                                                     | <b>23,731</b> |
| Trove2     | Rattus norvegicus TROVE domain family, member 2 (Trove2), mRNA [NM_001107183]                                                   | <b>23,720</b> |
| Nop2       | Rattus norvegicus NOP2 nucleolar protein homolog (yeast) (Nop2), mRNA [NM_001191785]                                            | <b>23,718</b> |
| Ube3b      | Rattus norvegicus ubiquitin protein ligase E3B (Ube3b), mRNA [NM_001143894]                                                     | <b>23,711</b> |
| LOC680319  | Rattus norvegicus hypothetical protein LOC680319 (LOC680319), mRNA [NM_001109401]                                               | <b>23,704</b> |
| Slc8a3     | Rattus norvegicus solute carrier family 8 (sodium/calcium exchanger), member 3 (Slc8a3), mRNA [NM_078620]                       | <b>23,703</b> |
| Freq       | Rattus norvegicus frequenin homolog (Drosophila) (Freq), mRNA [NM_024366]                                                       | <b>23,702</b> |
| Eri3       | Uncharacterized protein [Source:UniProtKB/TrEMBL;Acc:D4AA56] [ENSRNOT00000026222]                                               | <b>23,701</b> |
| Sms        | Rattus norvegicus spermine synthase (Sms), mRNA [NM_001033899]                                                                  | <b>23,698</b> |
| Shisa2     | Rattus norvegicus shisa homolog 2 (Xenopus laevis) (Shisa2), mRNA [NM_001191936]                                                | <b>23,694</b> |
| 0          | MMNPT2S01 Na <sup>+</sup> -phosphate cotransporter type II {Mus musculus} (exp=-1; wgp=0; cg=0), partial (12%) [TC607345]       | <b>23,682</b> |
| Zfp46      | Rattus norvegicus zinc finger protein 46 (Zfp46), mRNA [NM_001106691]                                                           | <b>23,662</b> |
| Eif1       | Rattus norvegicus eukaryotic translation initiation factor 1 (Eif1), mRNA [NM_001105837]                                        | <b>23,655</b> |
| B3gat3     | Rattus norvegicus beta-1,3-glucuronyltransferase 3 (glucuronosyltransferase I) (B3gat3), mRNA [NM_001128184]                    | <b>23,652</b> |

|            |                                                                                                                                                                                                                   |               |
|------------|-------------------------------------------------------------------------------------------------------------------------------------------------------------------------------------------------------------------|---------------|
| Sptbn2     | Rattus norvegicus spectrin, beta, non-erythrocytic 2 (Sptbn2), mRNA [NM_019167]                                                                                                                                   | <b>23,647</b> |
| Znf598     | Rattus norvegicus zinc finger protein 598 (Znf598), mRNA [NM_001105770]                                                                                                                                           | <b>23,645</b> |
| Nr4a1      | Rattus norvegicus nuclear receptor subfamily 4, group A, member 1 (Nr4a1), mRNA [NM_024388]                                                                                                                       | <b>23,643</b> |
| Shisa7     | Rattus norvegicus shisa homolog 7 (Xenopus laevis) (Shisa7), mRNA [NM_001145175]                                                                                                                                  | <b>23,642</b> |
| Mmp14      | Rattus norvegicus matrix metalloproteinase 14 (membrane-inserted) (Mmp14), mRNA [NM_031056]                                                                                                                       | <b>23,634</b> |
| 0          | Unknown                                                                                                                                                                                                           | <b>23,627</b> |
| Scrt1      | Rattus norvegicus scratch homolog 1, zinc finger protein (Drosophila) (Scrt1), mRNA [NM_001130570]                                                                                                                | <b>23,626</b> |
| Grip1      | Rattus norvegicus glutamate receptor interacting protein 1 (Grip1), mRNA [NM_032069]                                                                                                                              | <b>23,625</b> |
| Ppp1r1b    | Rattus norvegicus protein phosphatase 1, regulatory (inhibitor) subunit 1B (Ppp1r1b), mRNA [NM_138521]                                                                                                            | <b>23,620</b> |
| Nos2       | Rattus norvegicus nitric oxide synthase 2, inducible (Nos2), mRNA [NM_012611]                                                                                                                                     | <b>23,598</b> |
| Ampd3      | Rattus norvegicus adenosine monophosphate deaminase 3 (Ampd3), mRNA [NM_031544]                                                                                                                                   | <b>23,591</b> |
| Usf2       | Rattus norvegicus upstream transcription factor 2, c-fos interacting (Usf2), mRNA [NM_031139]                                                                                                                     | <b>23,584</b> |
| Smad5      | Rattus norvegicus SMAD family member 5 (Smad5), mRNA [NM_021692]                                                                                                                                                  | <b>23,575</b> |
| Tmem167b   | Rattus norvegicus transmembrane protein 167B (Tmem167b), mRNA [NM_001135260]                                                                                                                                      | <b>23,536</b> |
| 0          | Unknown                                                                                                                                                                                                           | <b>23,535</b> |
| Mcart1     | Rattus norvegicus mitochondrial carrier triple repeat 1 (Mcart1), nuclear gene encoding mitochondrial protein, mRNA [NM_001024785]                                                                                | <b>23,534</b> |
| 0          | Unknown                                                                                                                                                                                                           | <b>23,533</b> |
| Cyp46a1    | Rattus norvegicus cytochrome P450, family 46, subfamily a, polypeptide 1 (Cyp46a1), mRNA [NM_001108723]                                                                                                           | <b>23,506</b> |
| RGD1565886 | PREDICTED: Rattus norvegicus RGD1565886 (RGD1565886), mRNA [XM_237943]                                                                                                                                            | <b>23,504</b> |
| Zbtb16     | Rattus norvegicus zinc finger and BTB domain containing 16 (Zbtb16), mRNA [NM_001013181]                                                                                                                          | <b>23,501</b> |
| Slc25a39   | Rattus norvegicus solute carrier family 25, member 39 (Slc25a39), mRNA [NM_001024792]                                                                                                                             | <b>23,494</b> |
| Ccdc60     | Rattus norvegicus coiled-coil domain containing 60 (Ccdc60), mRNA [NM_001034945]                                                                                                                                  | <b>23,486</b> |
| Kctd7      | Rattus norvegicus potassium channel tetramerisation domain containing 7 (Kctd7), mRNA [NM_001128194]                                                                                                              | <b>23,484</b> |
| Sorbs2     | Rattus norvegicus sorbin and SH3 domain containing 2 (Sorbs2), mRNA [NM_053770]                                                                                                                                   | <b>23,480</b> |
| Npas4      | Rattus norvegicus neuronal PAS domain protein 4 (Npas4), mRNA [NM_153626]                                                                                                                                         | <b>23,478</b> |
| Letmd1     | Rattus norvegicus LETM1 domain containing 1 (Letmd1), mRNA [NM_001122781]                                                                                                                                         | <b>23,478</b> |
| Pptc7      | Rattus norvegicus PTC7 protein phosphatase homolog (S. cerevisiae) (Pptc7), mRNA [NM_001107141]                                                                                                                   | <b>23,446</b> |
| 0          | Q3U6G1_MOUSE (Q3U6G1) Bone marrow macrophage cDNA, RIKEN full-length enriched library, clone:l830125G18 product:biliverdin reductase B (flavin reductase (NADPH)), full insert sequence, partial (78%) [TC609126] | <b>23,434</b> |
| Srek1ip1   | Rattus norvegicus splicing regulatory glutamine/lysine-rich protein 1 interacting protein 1 (Srek1ip1), mRNA [NM_001008373]                                                                                       | <b>23,428</b> |
| RGD1560171 | PREDICTED: Rattus norvegicus similar to PRO0149 protein (RGD1560171), mRNA [XM_001054786]                                                                                                                         | <b>23,427</b> |
| 0          | GSCR1_HUMAN (Q9NZM4) Glioma tumor suppressor candidate region gene 1 protein, partial (8%) [TC610073]                                                                                                             | <b>23,423</b> |
| 0          | Unknown                                                                                                                                                                                                           | <b>23,422</b> |
| Mfap5      | Rattus norvegicus microfibrillar associated protein 5 (Mfap5), mRNA [NM_001108644]                                                                                                                                | <b>23,407</b> |

|            |                                                                                                                                                |               |
|------------|------------------------------------------------------------------------------------------------------------------------------------------------|---------------|
| Smad4      | Rattus norvegicus SMAD family member 4 (Smad4), mRNA [NM_019275]                                                                               | <b>23,406</b> |
| Dpm2       | Rattus norvegicus dolichyl-phosphate mannosyltransferase polypeptide 2, regulatory subunit (Dpm2), mRNA [NM_019252]                            | <b>23,405</b> |
| Otor       | Rattus norvegicus otoraplin (Otor), mRNA [NM_001108960]                                                                                        | <b>23,398</b> |
| Rod1       | Rattus norvegicus ROD1 regulator of differentiation 1 (S. pombe) (Rod1), mRNA [NM_031346]                                                      | <b>23,390</b> |
| LOC291686  | PREDICTED: Rattus norvegicus similar to 60S ribosomal protein L23a (LOC291686), mRNA [XM_002725324]                                            | <b>23,377</b> |
| 0          | Rattus norvegicus similar to glyceraldehyde-3-phosphate dehydrogenase (LOC297809), mRNA [XM_216324]                                            | <b>23,373</b> |
| Gtf3c2     | Rattus norvegicus general transcription factor IIIC, polypeptide 2, beta (Gtf3c2), mRNA [NM_001025120]                                         | <b>23,369</b> |
| Fam167a    | Rattus norvegicus family with sequence similarity 167, member A (Fam167a), mRNA [NM_001109102]                                                 | <b>23,352</b> |
| LRRTM1     | Rattus norvegicus leucine rich repeat transmembrane neuronal 1 (LRRTM1), mRNA [NM_001109374]                                                   | <b>23,352</b> |
| Slc12a5    | Rattus norvegicus solute carrier family 12 (potassium-chloride transporter), member 5 (Slc12a5), mRNA [NM_134363]                              | <b>23,350</b> |
| Casc4      | PREDICTED: Rattus norvegicus cancer susceptibility candidate 4, transcript variant 3 (Casc4), mRNA [XM_001077018]                              | <b>23,350</b> |
| Serping1   | Rattus norvegicus serine (or cysteine) peptidase inhibitor, clade G, member 1 (Serping1), mRNA [NM_199093]                                     | <b>23,340</b> |
| RGD1307399 | Rattus norvegicus similar to chromosome 20 open reading frame 30; HSPC274 protein (RGD1307399), mRNA [NM_001048043]                            | <b>23,337</b> |
| 0          | Unknown                                                                                                                                        | <b>23,330</b> |
| Diaph3     | PREDICTED: Rattus norvegicus diaphanous homolog 3 (Drosophila) (Diaph3), mRNA [XM_001074393]                                                   | <b>23,325</b> |
| Ptprr      | Rattus norvegicus protein tyrosine phosphatase, receptor type, R (Ptprr), transcript variant 1, mRNA [NM_053594]                               | <b>23,324</b> |
| Map3k7     | Rattus norvegicus mitogen activated protein kinase kinase kinase 7 (Map3k7), mRNA [NM_001107920]                                               | <b>23,319</b> |
| Dok7       | Rattus norvegicus docking protein 7 (Dok7), mRNA [NM_001130062]                                                                                | <b>23,314</b> |
| Ncln       | Rattus norvegicus nicalin homolog (zebrafish) (Ncln), mRNA [NM_001014082]                                                                      | <b>23,312</b> |
| Cdc2l6     | Rattus norvegicus cell division cycle 2-like 6 (CDK8-like) (Cdc2l6), mRNA [NM_001107634]                                                       | <b>23,312</b> |
| Fam134b    | Rattus norvegicus family with sequence similarity 134, member B (Fam134b), mRNA [NM_001034912]                                                 | <b>23,299</b> |
| Arc        | Rattus norvegicus activity-regulated cytoskeleton-associated protein (Arc), mRNA [NM_019361]                                                   | <b>23,287</b> |
| LOC501389  | PREDICTED: Rattus norvegicus similar to chromosome 9 open reading frame 36 (LOC501389), partial mRNA [XM_576802]                               | <b>23,283</b> |
| Tet1       | Rattus norvegicus tet oncogene 1 (Tet1), mRNA [NM_001107643]                                                                                   | <b>23,278</b> |
| Dnm3       | Rattus norvegicus dynamin 3 (Dnm3), mRNA [NM_138538]                                                                                           | <b>23,275</b> |
| Tbc1d25    | Rattus norvegicus TBC1 domain family, member 25 (Tbc1d25), mRNA [NM_001106955]                                                                 | <b>23,273</b> |
| Utp6       | PREDICTED: Rattus norvegicus UTP6, small subunit (SSU) processome component, homolog (yeast), transcript variant 2 (Utp6), mRNA [XM_002724525] | <b>23,255</b> |
| Sel1l      | Rattus norvegicus sel-1 suppressor of lin-12-like (C. elegans) (Sel1l), mRNA [NM_177933]                                                       | <b>23,254</b> |
| Pcsk1n     | Rattus norvegicus proprotein convertase subtilisin/kexin type 1 inhibitor (Pcsk1n), mRNA [NM_019279]                                           | <b>23,250</b> |
| Grf1       | Uncharacterized protein [Source:UniProtKB/TrEMBL;Acc:D4AD82] [ENSRNOT00000021223]                                                              | <b>23,247</b> |
| Abcg1      | Rattus norvegicus ATP-binding cassette, subfamily G (WHITE), member 1 (Abcg1), mRNA [NM_053502]                                                | <b>23,246</b> |
| Olr1262    | Rattus norvegicus olfactory receptor 1262 (Olr1262), mRNA [NM_001000803]                                                                       | <b>23,244</b> |
| Snrpa      | Rattus norvegicus small nuclear ribonucleoprotein polypeptide A (Snrpa), mRNA [NM_001008303]                                                   | <b>23,241</b> |



|            |                                                                                                                                          |               |
|------------|------------------------------------------------------------------------------------------------------------------------------------------|---------------|
| Cpne8      | Rattus norvegicus copine VIII (Cpne8), mRNA [NM_001108750]                                                                               | <b>23,241</b> |
| Rap2b      | Rattus norvegicus RAP2B, member of RAS oncogene family (Rap2b), mRNA [NM_133410]                                                         | <b>23,234</b> |
| Copa       | Rattus norvegicus coatomer protein complex subunit alpha (Copa), mRNA [NM_001134540]                                                     | <b>23,233</b> |
| Pcp4l1     | Rattus norvegicus Purkinje cell protein 4-like 1 (Pcp4l1), mRNA [NM_001126093]                                                           | <b>23,232</b> |
| Ncoa5      | Rattus norvegicus nuclear receptor coactivator 5 (Ncoa5), mRNA [NM_001106543]                                                            | <b>23,231</b> |
| Ston2      | Rattus norvegicus stonin 2 (Ston2), mRNA [NM_001135874]                                                                                  | <b>23,225</b> |
| Nfkbib     | Rattus norvegicus nuclear factor of kappa light polypeptide gene enhancer in B-cells inhibitor, beta (Nfkbib), mRNA [NM_030867]          | <b>23,225</b> |
| 0          | EST352149 Rat gene index, normalized rat, norvegicus, Bento Soares Rattus norvegicus cDNA clone RGIHD72 5' end, mRNA sequence [AW920845] | <b>23,221</b> |
| 0          | Q5BK04_RAT (Q5BK04) LOC363306 protein (Fragment), partial (23%) [TC600364]                                                               | <b>23,221</b> |
| Nsd1       | Rattus norvegicus nuclear receptor binding SET domain protein 1 (Nsd1), mRNA [NM_001107337]                                              | <b>23,216</b> |
| Pcdhb3     | Rattus norvegicus protocadherin beta 3 (Pcdhb3), mRNA [NM_001014783]                                                                     | <b>23,212</b> |
| Slc7a14    | Rattus norvegicus solute carrier family 7 (cationic amino acid transporter, y+ system), member 14 (Slc7a14), mRNA [NM_001134615]         | <b>23,203</b> |
| Pcnp       | Rattus norvegicus PEST proteolytic signal containing nuclear protein (Pcnp), mRNA [NM_001047846]                                         | <b>23,201</b> |
| Stag1      | Rattus norvegicus stromal antigen 1 (Stag1), mRNA [NM_001108179]                                                                         | <b>23,197</b> |
| Prdx6      | Rattus norvegicus peroxiredoxin 6 (Prdx6), mRNA [NM_053576]                                                                              | <b>23,191</b> |
| Alg2       | Rattus norvegicus asparagine-linked glycosylation 2, alpha-1,3-mannosyltransferase homolog (S. cerevisiae) (Alg2), mRNA [NM_001100710]   | <b>23,186</b> |
| 0          | Uncharacterized protein [Source:UniProtKB/TrEMBL;Acc:D3ZV40] [ENSRNOT00000009733]                                                        | <b>23,175</b> |
| Slc16a1    | Rattus norvegicus solute carrier family 16, member 1 (monocarboxylic acid transporter 1) (Slc16a1), mRNA [NM_012716]                     | <b>23,168</b> |
| 0          | Unknown                                                                                                                                  | <b>23,164</b> |
| Pon2       | Rattus norvegicus paraoxonase 2 (Pon2), mRNA [NM_001013082]                                                                              | <b>23,155</b> |
| Ephb1      | Rattus norvegicus Eph receptor B1 (Ephb1), mRNA [NM_001104528]                                                                           | <b>23,150</b> |
| Pcdha1     | Rattus norvegicus protocadherin alpha 1 (Pcdha1), mRNA [NM_199503]                                                                       | <b>23,147</b> |
| Acsm5      | Rattus norvegicus acyl-CoA synthetase medium-chain family member 5 (Acsm5), mRNA [NM_001014162]                                          | <b>23,147</b> |
| RGD1563106 | Rattus norvegicus similar to novel protein (RGD1563106), mRNA [NM_001107010]                                                             | <b>23,141</b> |
| Cpne8      | Rattus norvegicus copine VIII (Cpne8), mRNA [NM_001108750]                                                                               | <b>23,137</b> |
| Hist1h2bm  | Rattus norvegicus histone cluster 1, H2bm (Hist1h2bm), mRNA [NM_001108414]                                                               | <b>23,123</b> |
| Traf3      | Rattus norvegicus Tnf receptor-associated factor 3 (Traf3), mRNA [NM_001108724]                                                          | <b>23,122</b> |
| Gnas       | Rattus norvegicus GNAS complex locus (Gnas), transcript variant 5, mRNA [NM_001159656]                                                   | <b>23,120</b> |
| Smoc1      | Rattus norvegicus SPARC related modular calcium binding 1 (Smoc1), mRNA [NM_001002835]                                                   | <b>23,106</b> |
| Usp6nl     | Rattus norvegicus USP6 N-terminal like (Usp6nl), mRNA [NM_001106120]                                                                     | <b>23,100</b> |
| Pmepa1     | Rattus norvegicus prostate transmembrane protein, androgen induced 1 (Pmepa1), mRNA [NM_001107807]                                       | <b>23,095</b> |
| Map2k7     | Rattus norvegicus mitogen activated protein kinase kinase 7 (Map2k7), mRNA [NM_001025425]                                                | <b>23,086</b> |
| Mapkapk2   | Rattus norvegicus mitogen-activated protein kinase-activated protein kinase 2 (Mapkapk2), mRNA [NM_178102]                               | <b>23,080</b> |

|              |                                                                                                                                                            |               |
|--------------|------------------------------------------------------------------------------------------------------------------------------------------------------------|---------------|
| 0            | family with sequence similarity 184, member A Gene [Source:MGI Symbol;Acc:MGI:1923156] [ENSRNOT00000000475]                                                | <b>23,077</b> |
| Olr1395      | Rattus norvegicus olfactory receptor 1395 (Olr1395), mRNA [NM_001001092]                                                                                   | <b>23,074</b> |
| Ust          | Rattus norvegicus uronyl-2-sulfotransferase (Ust), mRNA [NM_001108458]                                                                                     | <b>23,063</b> |
| Man1c1       | Rattus norvegicus mannosidase, alpha, class 1C, member 1 (Man1c1), mRNA [NM_001108687]                                                                     | <b>23,053</b> |
| 0            | CR467520 Rat pBluescript Lion Rattus norvegicus cDNA clone LIONp463D12400 3', mRNA sequence [CR467520]                                                     | <b>23,053</b> |
| Reep1        | Rattus norvegicus receptor accessory protein 1 (Reep1), nuclear gene encoding mitochondrial protein, mRNA [NM_001108633]                                   | <b>23,050</b> |
| RGD1307621   | Rattus norvegicus hypothetical LOC314168 (RGD1307621), mRNA [NM_001108025]                                                                                 | <b>23,049</b> |
| Dlgap2       | Rattus norvegicus discs, large (Drosophila) homolog-associated protein 2 (Dlgap2), mRNA [NM_053901]                                                        | <b>23,047</b> |
| RGD1308782   | Rattus norvegicus similar to Zinc finger protein OZF (POZF-1) (RGD1308782), mRNA [NM_001025677]                                                            | <b>23,041</b> |
| 0            | Echinoderm microtubule-associated protein-like 5 [Source:UniProtKB/Swiss-Prot;Acc:Q6ED65] [ENSRNOT00000005978]                                             | <b>23,036</b> |
| 0            | PREDICTED: Rattus norvegicus RALBP1 associated Eps domain containing 2 (Reps2), miscRNA [XR_085945]                                                        | <b>23,031</b> |
| LOC100364162 | PREDICTED: Rattus norvegicus ring finger protein 11-like (LOC100364162), mRNA [XM_002726577]                                                               | <b>23,029</b> |
| Scmh1        | Rattus norvegicus sex comb on midleg homolog 1 (Drosophila) (Scmh1), mRNA [NM_001109669]                                                                   | <b>23,026</b> |
| Hist3h2a     | Rattus norvegicus histone cluster 3, H2a (Hist3h2a), mRNA [NM_021840]                                                                                      | <b>23,025</b> |
| Arl2bp       | Rattus norvegicus ADP-ribosylation factor-like 2 binding protein (Arl2bp), mRNA [NM_001024906]                                                             | <b>23,021</b> |
| Fam123a      | PREDICTED: Rattus norvegicus family with sequence similarity 123A, transcript variant 2 (Fam123a), mRNA [XM_573799]                                        | <b>23,016</b> |
| Ascl5        | PREDICTED: Rattus norvegicus achaete-scute complex homolog 5 (Drosophila) (Ascl5), mRNA [XM_344144]                                                        | <b>23,014</b> |
| RGD1560891   | RCG36219Uncharacterized protein [Source:UniProtKB/TrEMBL;Acc:D4ACQ4] [ENSRNOT00000044006]                                                                  | <b>22,996</b> |
| Fam12b       | Rattus norvegicus family with sequence similarity 12, member B (epididymal) (Fam12b), mRNA [NM_178103]                                                     | <b>22,992</b> |
| Cry2         | Rattus norvegicus cryptochrome 2 (photolyase-like) (Cry2), mRNA [NM_133405]                                                                                | <b>22,991</b> |
| RGD1566264   | Uncharacterized protein [Source:UniProtKB/TrEMBL;Acc:D3ZFF1] [ENSRNOT00000051929]                                                                          | <b>22,989</b> |
| Mavs         | Rattus norvegicus mitochondrial antiviral signaling protein (Mavs), nuclear gene encoding mitochondrial protein, mRNA [NM_001005556]                       | <b>22,980</b> |
| Tnni2        | Rattus norvegicus troponin I type 2 (skeletal, fast) (Tnni2), mRNA [NM_017185]                                                                             | <b>22,978</b> |
| Bcl2l1       | Rattus norvegicus Bcl2-like 1 (Bcl2l1), nuclear gene encoding mitochondrial protein, transcript variant 3, mRNA [NM_001033670]                             | <b>22,977</b> |
| Cyp4f6       | Rattus norvegicus cytochrome P450, family 4, subfamily f, polypeptide 6 (Cyp4f6), mRNA [NM_153318]                                                         | <b>22,958</b> |
| Hsd17b7      | Rattus norvegicus hydroxysteroid (17-beta) dehydrogenase 7 (Hsd17b7), mRNA [NM_017235]                                                                     | <b>22,941</b> |
| Ahcy1        | Rattus norvegicus adenosylhomocysteinase-like 1 (Ahcy1), mRNA [NM_001108561]                                                                               | <b>22,931</b> |
| Nras         | Rattus norvegicus neuroblastoma ras oncogene (Nras), mRNA [NM_080766]                                                                                      | <b>22,929</b> |
| Prok2        | Rattus norvegicus prokineticin 2 (Prok2), transcript variant 1, mRNA [NM_001037541]                                                                        | <b>22,921</b> |
| DbnDD2       | Rattus norvegicus dysbindin (dystrobrevin binding protein 1) domain containing 2 (DbnDD2), mRNA [NM_001047111]                                             | <b>22,916</b> |
| Arhgap26     | Rattus norvegicus Rho GTPase activating protein 26 (Arhgap26), mRNA [NM_001107389]                                                                         | <b>22,910</b> |
| Gatm         | Rattus norvegicus glycine amidinotransferase (L-arginine:glycine amidinotransferase) (Gatm), nuclear gene encoding mitochondrial protein, mRNA [NM_031031] | <b>22,906</b> |
| Lrba         | Rattus norvegicus LPS-responsive vesicle trafficking, beach and anchor containing (Lrba), mRNA [NM_001108555]                                              | <b>22,904</b> |

|            |                                                                                                                                       |        |
|------------|---------------------------------------------------------------------------------------------------------------------------------------|--------|
| Gabrb2     | Rattus norvegicus gamma-aminobutyric acid (GABA) A receptor, beta 2 (Gabrb2), mRNA [NM_012957]                                        | 22,897 |
| 0          | Q8R1R5_RAT (Q8R1R5) MIC2L1, partial (9%) [TC628118]                                                                                   | 22,897 |
| RGD1311249 | Rattus norvegicus similar to RIKEN cDNA B230312A22 (RGD1311249), mRNA [NM_001013931]                                                  | 22,890 |
| Dmd        | Rattus norvegicus dystrophin (Dmd), transcript variant Dp71c, mRNA [NM_001005246]                                                     | 22,890 |
| Arfgap3    | Rattus norvegicus ADP-ribosylation factor GTPase activating protein 3 (Arfgap3), mRNA [NM_001044273]                                  | 22,882 |
| Hormad2    | Rattus norvegicus HORMA domain containing 2 (Hormad2), mRNA [NM_001017501]                                                            | 22,880 |
| 0          | Unknown                                                                                                                               | 22,876 |
| Rhbdl3     | Rattus norvegicus rhomboid, veinlet-like 3 (Drosophila) (Rhbdl3), mRNA [NM_001105819]                                                 | 22,856 |
| 0          | Rattus norvegicus activity and neurotransmitter-induced early gene 2 (ania-2) mRNA, 3'UTR. [AF030087]                                 | 22,855 |
| Pycl       | Rattus norvegicus pyrroline-5-carboxylate reductase-like (Pycl), mRNA [NM_001011993]                                                  | 22,847 |
| 0          | Uncharacterized protein [Source:UniProtKB/TrEMBL;Acc:D4A4B0] [ENSRNOT00000032008]                                                     | 22,847 |
| Wipf2      | Rattus norvegicus WAS/WASL interacting protein family, member 2 (Wipf2), mRNA [NM_001191825]                                          | 22,842 |
| Fam25a     | Rattus norvegicus family with sequence similarity 25, member A (Fam25a), mRNA [NM_001134849]                                          | 22,839 |
| Tmem101    | Rattus norvegicus transmembrane protein 101 (Tmem101), mRNA [NM_001191650]                                                            | 22,837 |
| Lhfp13     | Uncharacterized protein [Source:UniProtKB/TrEMBL;Acc:D4AA53] [ENSRNOT00000043281]                                                     | 22,833 |
| Fbxo42     | Rattus norvegicus F-box protein 42 (Fbxo42), mRNA [NM_001108691]                                                                      | 22,825 |
| 0          | RCG37698, isoform CRA_aUncharacterized protein [Source:UniProtKB/TrEMBL;Acc:D4AAY1] [ENSRNOT00000037022]                              | 22,823 |
| Arhgef11   | Rattus norvegicus Rho guanine nucleotide exchange factor (GEF) 11 (Arhgef11), mRNA [NM_023982]                                        | 22,819 |
| 0          | Rattus norvegicus similar to 60S RIBOSOMAL PROTEIN L29 (P23) (LOC291941), mRNA [XM_226367]                                            | 22,815 |
| 0          | Unknown                                                                                                                               | 22,811 |
| Synj1      | Rattus norvegicus synaptojanin 1 (Synj1), mRNA [NM_053476]                                                                            | 22,809 |
| 0          | Unknown                                                                                                                               | 22,807 |
| Sall3      | Rattus norvegicus sal-like 3 (Drosophila) (Sall3), mRNA [NM_001108892]                                                                | 22,794 |
| 0          | Unknown                                                                                                                               | 22,793 |
| 0          | GLIS family zinc finger 1 (Predicted), isoform CRA_bUncharacterized protein [Source:UniProtKB/TrEMBL;Acc:D4A5Q8] [ENSRNOT00000032433] | 22,790 |
| Gabrb1     | Rattus norvegicus gamma-aminobutyric acid (GABA) A receptor, beta 1 (Gabrb1), mRNA [NM_012956]                                        | 22,786 |
| LOC313672  | Rattus norvegicus kazrin (LOC313672), mRNA [NM_001014070]                                                                             | 22,782 |
| Abi2       | Rattus norvegicus abl-interactor 2 (Abi2), mRNA [NM_173143]                                                                           | 22,782 |
| Spon1      | Rattus norvegicus spondin 1, extracellular matrix protein (Spon1), mRNA [NM_172067]                                                   | 22,769 |
| LOC498662  | Rattus norvegicus similar to RIKEN cDNA 2610019F03 (LOC498662), mRNA [NM_001100791]                                                   | 22,766 |
| Stox2      | Rattus norvegicus storkhead box 2 (Stox2), transcript variant 1, mRNA [NM_001134863]                                                  | 22,762 |
| Rab3b      | Rattus norvegicus RAB3B, member RAS oncogene family (Rab3b), mRNA [NM_031091]                                                         | 22,757 |
| RGD1565310 | PREDICTED: Rattus norvegicus similar to RIKEN cDNA 1110018J12 (RGD1565310), mRNA [XM_001057346]                                       | 22,748 |
| RGD1565183 | Uncharacterized protein [Source:UniProtKB/TrEMBL;Acc:D3ZG08] [ENSRNOT00000049254]                                                     | 22,748 |

|            |                                                                                                                                             |        |
|------------|---------------------------------------------------------------------------------------------------------------------------------------------|--------|
| Msl2       | PREDICTED: Rattus norvegicus male-specific lethal 2-like 1 (Drosophila) (Msl2l1), mRNA [XM_001071576]                                       | 22,742 |
| 0          | Unknown                                                                                                                                     | 22,741 |
| Slc25a42   | Rattus norvegicus solute carrier family 25, member 42 (Slc25a42), mRNA [NM_001127590]                                                       | 22,741 |
| LOC296300  | Rattus norvegicus similar to zinc finger protein 341 (LOC296300), mRNA [NM_001047859]                                                       | 22,737 |
| Plekhg2    | Rattus norvegicus pleckstrin homology domain containing, family G (with RhoGef domain) member 2 (Plekhg2), mRNA [NM_001134972]              | 22,733 |
| Dhcr24     | Rattus norvegicus 24-dehydrocholesterol reductase (Dhcr24), mRNA [NM_001080148]                                                             | 22,730 |
| Pak3       | Rattus norvegicus p21 protein (Cdc42/Rac)-activated kinase 3 (Pak3), mRNA [NM_019210]                                                       | 22,730 |
| Scaf1      | Rattus norvegicus SR-related CTD-associated factor 1 (Scaf1), mRNA [NM_019384]                                                              | 22,730 |
| Hlf        | PREDICTED: Rattus norvegicus hepatic leukemia factor (Hlf), mRNA [XM_001081149]                                                             | 22,728 |
| Hcrt       | Rattus norvegicus hypocretin (Hcrt), mRNA [NM_013179]                                                                                       | 22,723 |
| 0          | Unknown                                                                                                                                     | 22,713 |
| Gria2      | Rattus norvegicus glutamate receptor, ionotropic, AMPA 2 (Gria2), transcript variant 2, mRNA [NM_001083811]                                 | 22,707 |
| Pcsk6      | Rattus norvegicus proprotein convertase subtilisin/kexin type 6 (Pcsk6), mRNA [NM_012999]                                                   | 22,700 |
| Scn11a     | Rattus norvegicus sodium channel, voltage-gated, type XI, alpha (Scn11a), mRNA [NM_019265]                                                  | 22,692 |
| Tmem8b     | Uncharacterized protein [Source:UniProtKB/TrEMBL;Acc:D4AD81] [ENSRNOT00000021227]                                                           | 22,692 |
| Rnf216     | Rattus norvegicus ring finger protein 216 (Rnf216), mRNA [NM_001107122]                                                                     | 22,687 |
| 0          | U2af2 protein [Source:UniProtKB/TrEMBL;Acc:Q5EB64] [ENSRNOT00000021391]                                                                     | 22,686 |
| Golga7     | Rattus norvegicus golgi autoantigen, golgin subfamily a, 7 (Golga7), mRNA [NM_001007731]                                                    | 22,685 |
| Zdhhc3     | Rattus norvegicus zinc finger, DHHC-type containing 3 (Zdhhc3), mRNA [NM_001039014]                                                         | 22,681 |
| Cnih2      | Rattus norvegicus cornichon homolog 2 (Drosophila) (Cnih2), mRNA [NM_001025132]                                                             | 22,680 |
| Ube2o      | PREDICTED: Rattus norvegicus ubiquitin-conjugating enzyme E2O (Ube2o), mRNA [XM_001081723]                                                  | 22,679 |
| Sgsm1      | Rattus norvegicus small G protein signaling modulator 1 (Sgsm1), mRNA [NM_001105937]                                                        | 22,677 |
| Ftsjd2     | Rattus norvegicus FtsJ methyltransferase domain containing 2 (Ftsjd2), mRNA [NM_001014031]                                                  | 22,673 |
| RGD1562629 | PREDICTED: Rattus norvegicus similar to neurobeachin (RGD1562629), miscRNA [XR_085753]                                                      | 22,671 |
| Acss1      | Rattus norvegicus acyl-CoA synthetase short-chain family member 1 (Acss1), nuclear gene encoding mitochondrial protein, mRNA [NM_001106524] | 22,668 |
| 0          | Uncharacterized protein [Source:UniProtKB/TrEMBL;Acc:D4AE00] [ENSRNOT00000026030]                                                           | 22,667 |
| Tulp4      | Rattus norvegicus tubby like protein 4 (Tulp4), mRNA [NM_001109137]                                                                         | 22,665 |
| Pde1a      | Rattus norvegicus phosphodiesterase 1A, calmodulin-dependent (Pde1a), mRNA [NM_030871]                                                      | 22,660 |
| Gas7       | Rattus norvegicus mRNA for GAS-7 protein. [AJ131902]                                                                                        | 22,655 |
| Elovl1     | Rattus norvegicus elongation of very long chain fatty acids (FEN1/Elo2, SUR4/Elo3, yeast)-like 1 (Elovl1), mRNA [NM_001044275]              | 22,653 |
| Olr1535    | Rattus norvegicus olfactory receptor 1535 (Olr1535), mRNA [NM_001000945]                                                                    | 22,645 |
| Stfa2l1    | Rattus norvegicus stefin A2-like 1 (Stfa2l1), mRNA [NM_001004129]                                                                           | 22,644 |
| 0          | Unknown                                                                                                                                     | 22,638 |

|            |                                                                                                                                                                           |               |
|------------|---------------------------------------------------------------------------------------------------------------------------------------------------------------------------|---------------|
| Capza1     | Rattus norvegicus capping protein (actin filament) muscle Z-line, alpha 1 (Capza1), mRNA [NM_001109625]                                                                   | <b>22,634</b> |
| Rimbp2     | Rattus norvegicus RIM binding protein 2 (Rimbp2), mRNA [NM_001100488]                                                                                                     | <b>22,632</b> |
| Hspc159    | Rattus norvegicus galectin-related protein (Hspc159), mRNA [NM_001134730]                                                                                                 | <b>22,630</b> |
| 0          | Unknown                                                                                                                                                                   | <b>22,627</b> |
| Taf10      | Rattus norvegicus TAF10 RNA polymerase II, TATA box binding protein (TBP)-associated factor (Taf10), mRNA [NM_001134735]                                                  | <b>22,627</b> |
| Fchsd2     | Rattus norvegicus FCH and double SH3 domains 2 (Fchsd2), mRNA [NM_001107539]                                                                                              | <b>22,623</b> |
| Slc44a2    | Rattus norvegicus solute carrier family 44, member 2 (Slc44a2), mRNA [NM_001134715]                                                                                       | <b>22,613</b> |
| Lhfp       | Rattus norvegicus lipoma HMGIC fusion partner (Lhfp), mRNA [NM_001109183]                                                                                                 | <b>22,607</b> |
| 0          | Unknown                                                                                                                                                                   | <b>22,603</b> |
| Cdc42      | Rattus norvegicus cell division cycle 42 (GTP binding protein) (Cdc42), mRNA [NM_171994]                                                                                  | <b>22,601</b> |
| RGD1309586 | Rattus norvegicus similar to probable ATP-dependent RNA helicase - mouse (RGD1309586), mRNA [NM_001108858]                                                                | <b>22,595</b> |
| Galnt1     | Polypeptide N-acetylgalactosaminyltransferase 1Polypeptide N-acetylgalactosaminyltransferase 1 soluble form [Source:UniProtKB/Swiss-Prot;Acc:Q10473] [ENSRNOT00000022117] | <b>22,591</b> |
| Slc10a7    | Rattus norvegicus solute carrier family 10 (sodium/bile acid cotransporter family), member 7 (Slc10a7), mRNA [NM_001010948]                                               | <b>22,589</b> |
| LOC684998  | PREDICTED: Rattus norvegicus hypothetical protein LOC684998 (LOC684998), mRNA [XM_001061848]                                                                              | <b>22,582</b> |
| RGD1306595 | Rattus norvegicus similar to hypothetical protein (RGD1306595), mRNA [NM_001025626]                                                                                       | <b>22,581</b> |
| Kdelr1     | Rattus norvegicus KDEL (Lys-Asp-Glu-Leu) endoplasmic reticulum protein retention receptor 1 (Kdelr1), mRNA [NM_001017385]                                                 | <b>22,579</b> |
| Zfp384     | Rattus norvegicus zinc finger protein 384 (Zfp384), transcript variant 1, mRNA [NM_133429]                                                                                | <b>22,579</b> |
| A2bp1      | Rattus norvegicus ataxin 2 binding protein 1 (A2bp1), mRNA [NM_001106974]                                                                                                 | <b>22,569</b> |
| Fam195b    | Rattus norvegicus family with sequence similarity 195, member B (Fam195b), mRNA [NM_001108311]                                                                            | <b>22,567</b> |
| Tspan11    | Rattus norvegicus tetraspanin 11 (Tspan11), mRNA [NM_001024262]                                                                                                           | <b>22,557</b> |
| Add1       | Rattus norvegicus adducin 1 (alpha) (Add1), mRNA [NM_016990]                                                                                                              | <b>22,555</b> |
| Slc9a7     | Rattus norvegicus solute carrier family 9 (sodium/hydrogen exchanger), member 7 (Slc9a7), mRNA [NM_001108242]                                                             | <b>22,553</b> |
| Ppbp       | Rattus norvegicus pro-platelet basic protein (chemokine (C-X-C motif) ligand 7) (Ppbp), mRNA [NM_153721]                                                                  | <b>22,551</b> |
| RGD1311084 | Rattus norvegicus similar to 1700113K14Rik protein (RGD1311084), mRNA [NM_001100979]                                                                                      | <b>22,549</b> |
| 0          | CFP1_MOUSE (Q8BGU5) Cyclin fold protein 1, partial (69%) [TC584108]                                                                                                       | <b>22,544</b> |
| Thtpa      | Rattus norvegicus thiamine triphosphatase (Thtpa), mRNA [NM_001007682]                                                                                                    | <b>22,537</b> |
| Clint1     | Rattus norvegicus clathrin interactor 1 (Clint1), mRNA [NM_001002022]                                                                                                     | <b>22,536</b> |
| Inpp5a     | inositol polyphosphate-5-phosphatase A [Source:RefSeq peptide;Acc:NP_001102393] [ENSRNOT00000054890]                                                                      | <b>22,533</b> |
| Ugt1a6     | Rattus norvegicus UDP glucuronosyltransferase 1 family, polypeptide A6 (Ugt1a6), transcript variant 1, mRNA [NM_001039691]                                                | <b>22,520</b> |
| Pvrl3      | Rattus norvegicus poliovirus receptor-related 3 (Pvrl3), mRNA [NM_001105883]                                                                                              | <b>22,518</b> |
| Chic1      | Uncharacterized protein [Source:UniProtKB/TrEMBL;Acc:D3ZJX3] [ENSRNOT00000015693]                                                                                         | <b>22,511</b> |
| Bri3bp     | Rattus norvegicus Bri3 binding protein (Bri3bp), mRNA [NM_001017487]                                                                                                      | <b>22,506</b> |
| Nf2        | Rattus norvegicus neurofibromin 2 (merlin) (Nf2), mRNA [NM_013193]                                                                                                        | <b>22,500</b> |

|              |                                                                                                                                                          |               |
|--------------|----------------------------------------------------------------------------------------------------------------------------------------------------------|---------------|
| Rnf40        | Rattus norvegicus ring finger protein 40 (Rnf40), mRNA [NM_153471]                                                                                       | <b>22,500</b> |
| Cox11        | Rattus norvegicus COX11 homolog, cytochrome c oxidase assembly protein (yeast) (Cox11), nuclear gene encoding mitochondrial protein, mRNA [NM_001109575] | <b>22,498</b> |
| Nsd1         | Rattus norvegicus nuclear receptor binding SET domain protein 1 (Nsd1), mRNA [NM_001107337]                                                              | <b>22,497</b> |
| Cic          | Rattus norvegicus capicua homolog (Drosophila) (Cic), mRNA [NM_001107490]                                                                                | <b>22,490</b> |
| Rybp         | Rattus norvegicus RING1 and YY1 binding protein (Rybp), mRNA [NM_001107879]                                                                              | <b>22,489</b> |
| Zbtb7a       | Rattus norvegicus zinc finger and BTB domain containing 7a (Zbtb7a), mRNA [NM_054002]                                                                    | <b>22,467</b> |
| Synj1        | Rattus norvegicus synaptojanin 1 (Synj1), mRNA [NM_053476]                                                                                               | <b>22,465</b> |
| F2r          | Rattus norvegicus coagulation factor II (thrombin) receptor (F2r), mRNA [NM_012950]                                                                      | <b>22,464</b> |
| Trpc4ap      | Rattus norvegicus transient receptor potential cation channel, subfamily C, member 4 associated protein (Trpc4ap), mRNA [NM_001100748]                   | <b>22,463</b> |
| LOC688741    | PREDICTED: Rattus norvegicus hypothetical protein LOC688741 (LOC688741), mRNA [XM_002724948]                                                             | <b>22,462</b> |
| Tbc1d24      | Rattus norvegicus TBC1 domain family, member 24 (Tbc1d24), mRNA [NM_001105769]                                                                           | <b>22,461</b> |
| Gabbr1       | Rattus norvegicus GABA B receptor 1g mRNA, complete cds. [AF312319]                                                                                      | <b>22,452</b> |
| LOC680955    | RCG43690, isoform CRA_aUncharacterized protein [Source:UniProtKB/TrEMBL;Acc:D3ZHC6] [ENSRNOT00000061674]                                                 | <b>22,447</b> |
| LOC100365064 | PREDICTED: Rattus norvegicus zinc finger protein, multitype 1-like (LOC100365064), mRNA [XM_002725423]                                                   | <b>22,445</b> |
| LOC681351    | PREDICTED: Rattus norvegicus similar to apolipoprotein L, 3 (LOC681351), mRNA [XM_001061370]                                                             | <b>22,442</b> |
| Nipsnap3b    | Rattus norvegicus nipsnap homolog 3B (C. elegans) (Nipsnap3b), mRNA [NM_001009422]                                                                       | <b>22,436</b> |
| Eif4e3       | Rattus norvegicus eukaryotic translation initiation factor 4E family member 3 (Eif4e3), mRNA [NM_001106612]                                              | <b>22,431</b> |
| 0            | Unknown                                                                                                                                                  | <b>22,429</b> |
| Gga3         | Rattus norvegicus golgi associated, gamma adaptin ear containing, ARF binding protein 3 (Gga3), mRNA [NM_001108304]                                      | <b>22,421</b> |
| Pxn          | Rattus norvegicus paxillin (Pxn), mRNA [NM_001012147]                                                                                                    | <b>22,420</b> |
| Ccdc71       | Rattus norvegicus coiled-coil domain containing 71 (Ccdc71), mRNA [NM_001024904]                                                                         | <b>22,417</b> |
| 0            | Rattus norvegicus TL0AEA68YG04 mRNA sequence. [FQ231741]                                                                                                 | <b>22,411</b> |
| Mageb17      | PREDICTED: Rattus norvegicus melanoma antigen family B, 17 (Mageb17), mRNA [XM_001063539]                                                                | <b>22,397</b> |
| Npc2         | Rattus norvegicus Niemann-Pick disease, type C2 (Npc2), mRNA [NM_173118]                                                                                 | <b>22,390</b> |
| Znf703       | Rattus norvegicus zinc finger protein 703 (Znf703), mRNA [NM_001109425]                                                                                  | <b>22,388</b> |
| Hist1h2bc    | Rattus norvegicus histone cluster 1, H2bc (Hist1h2bc), mRNA [NM_001109400]                                                                               | <b>22,383</b> |
| Dscam11      | Rattus norvegicus Down syndrome cell adhesion molecule-like 1 (Dscam11), mRNA [NM_001108141]                                                             | <b>22,372</b> |
| Rorb         | Nuclear receptor ROR-beta [Source:UniProtKB/Swiss-Prot;Acc:P45446] [ENSRNOT00000018137]                                                                  | <b>22,372</b> |
| Zfp563       | Rattus norvegicus zinc finger protein 563 (Zfp563), mRNA [NM_001134561]                                                                                  | <b>22,355</b> |
| 0            | EST231431 Normalized rat ovary, Bento Soares Rattus sp. cDNA clone ROVCI85 3' end, mRNA sequence [AI234869]                                              | <b>22,355</b> |
| Casp7        | Rattus norvegicus caspase 7 (Casp7), mRNA [NM_022260]                                                                                                    | <b>22,353</b> |
| Kcnip4       | Rattus norvegicus Kv channel interacting protein 4 (Kcnip4), mRNA [NM_181365]                                                                            | <b>22,351</b> |
| Cyp51        | Rattus norvegicus cytochrome P450, family 51 (Cyp51), mRNA [NM_012941]                                                                                   | <b>22,349</b> |

|            |                                                                                                          |        |
|------------|----------------------------------------------------------------------------------------------------------|--------|
| Gria1      | Rattus norvegicus glutamate receptor, ionotropic, AMPA 1 (Gria1), mRNA [NM_031608]                       | 22,337 |
| Zbtb2      | Rattus norvegicus zinc finger and BTB domain containing 2 (Zbtb2), mRNA [NM_001107460]                   | 22,334 |
| Slc35e1    | Rattus norvegicus solute carrier family 35, member E1 (Slc35e1), mRNA [NM_001109107]                     | 22,329 |
| 0          | Unknown                                                                                                  | 22,327 |
| Srr        | Rattus norvegicus serine racemase (Srr), mRNA [NM_198757]                                                | 22,322 |
| Prkab2     | Rattus norvegicus protein kinase, AMP-activated, beta 2 non-catalytic subunit (Prkab2), mRNA [NM_022627] | 22,317 |
| Mta1       | Rattus norvegicus metastasis associated 1 (Mta1), mRNA [NM_022588]                                       | 22,317 |
| Grik2      | Glutamate receptor, ionotropic kainate 2 [Source:UniProtKB/Swiss-Prot;Acc:P42260] [ENSRNOT00000000415]   | 22,308 |
| N4bp1      | PREDICTED: Rattus norvegicus Nedd4 binding protein 1 (N4bp1), mRNA [XM_001068071]                        | 22,308 |
| Robo1      | Rattus norvegicus roundabout homolog 1 (Drosophila) (Robo1), mRNA [NM_022188]                            | 22,305 |
| RGD1566107 | Rattus norvegicus similar to cAMP responsive element binding protein 5 (RGD1566107), mRNA [NM_001134621] | 22,300 |
| Nt5dc3     | Rattus norvegicus 5'-nucleotidase domain containing 3 (Nt5dc3), mRNA [NM_001134887]                      | 22,299 |
| Csde1      | Rattus norvegicus cold shock domain containing E1, RNA binding (Csde1), mRNA [NM_054006]                 | 22,299 |
| Arpc4      | Rattus norvegicus actin related protein 2/3 complex, subunit 4 (Arpc4), mRNA [NM_001106615]              | 22,298 |
| RGD1564887 | PREDICTED: Rattus norvegicus similar to 9130011E15Rik protein (RGD1564887), mRNA [XM_574677]             | 22,297 |
| Rela       | Rattus norvegicus v-rel reticuloendotheliosis viral oncogene homolog A (avian) (Rela), mRNA [NM_199267]  | 22,296 |
| Erg        | Rattus norvegicus v-ets erythroblastosis virus E26 oncogene homolog (avian) (Erg), mRNA [NM_133397]      | 22,292 |
| 0          | PREDICTED: Rattus norvegicus similar to sidekick 1 (RGD1560686), miscRNA [XR_085987]                     | 22,284 |
| Rin2       | Rattus norvegicus Ras and Rab interactor 2 (Rin2), mRNA [NM_001107786]                                   | 22,284 |
| Rasl11a    | Rattus norvegicus RAS-like family 11 member A (Rasl11a), mRNA [NM_001002829]                             | 22,279 |
| Rsad2      | Rattus norvegicus radical S-adenosyl methionine domain containing 2 (Rsad2), mRNA [NM_138881]            | 22,278 |
| Igsf1      | Rattus norvegicus immunoglobulin superfamily, member 1 (Igsf1), mRNA [NM_175763]                         | 22,276 |
| Lsp1       | Rattus norvegicus lymphocyte-specific protein 1 (Lsp1), mRNA [NM_001025420]                              | 22,275 |
| Ubqln4     | Rattus norvegicus ubiquilin 4 (Ubqln4), mRNA [NM_001107688]                                              | 22,267 |
| Lasp1      | Rattus norvegicus LIM and SH3 protein 1 (Lasp1), mRNA [NM_032613]                                        | 22,265 |
| Nod2       | Rattus norvegicus nucleotide-binding oligomerization domain containing 2 (Nod2), mRNA [NM_001106172]     | 22,265 |
| Fstl4      | Rattus norvegicus follistatin-like 4 (Fstl4), mRNA [NM_001107000]                                        | 22,261 |
| Camk1g     | Rattus norvegicus calcium/calmodulin-dependent protein kinase IG (Camk1g), mRNA [NM_182842]              | 22,254 |
| RT1-DMa    | Rattus norvegicus RT1 class II, locus DMa (RT1-DMa), mRNA [NM_198741]                                    | 22,251 |
| 0          | Unknown                                                                                                  | 22,250 |
| Tspyl5     | Uncharacterized protein [Source:UniProtKB/TrEMBL;Acc:D3ZLU5] [ENSRNOT00000008227]                        | 22,232 |
| Slc25a39   | Rattus norvegicus solute carrier family 25, member 39 (Slc25a39), mRNA [NM_001024792]                    | 22,206 |
| Tjap1      | Rattus norvegicus tight junction associated protein 1 (Tjap1), mRNA [NM_001108203]                       | 22,194 |
| 0          | Unknown                                                                                                  | 22,193 |

|            |                                                                                                                                             |        |
|------------|---------------------------------------------------------------------------------------------------------------------------------------------|--------|
| 0          | Unknown                                                                                                                                     | 22,187 |
| 0          | Unknown                                                                                                                                     | 22,185 |
| Rnf150     | Rattus norvegicus ring finger protein 150 (Rnf150), mRNA [NM_001191093]                                                                     | 22,183 |
| 0          | Unknown                                                                                                                                     | 22,183 |
| 0          | Unknown                                                                                                                                     | 22,182 |
| 0          | Rattus norvegicus TL0ACA22YL15 mRNA sequence. [FQ217597]                                                                                    | 22,180 |
| Ptpn12     | Rattus norvegicus protein tyrosine phosphatase, non-receptor type 12 (Ptpn12), mRNA [NM_057115]                                             | 22,180 |
| RGD1562035 | PREDICTED: Rattus norvegicus similar to mast cell protease 1-like 3 precursor (RGD1562035), mRNA [XM_001057648]                             | 22,179 |
| Ppif       | Rattus norvegicus peptidylprolyl isomerase F (Ppif), nuclear gene encoding mitochondrial protein, mRNA [NM_172243]                          | 22,175 |
| 0          | AGENCOURT_109870505 NIH_MGC_420 Rattus norvegicus cDNA clone IMAGE:9033411 5', mRNA sequence [EV768969]                                     | 22,166 |
| Tomm34     | Rattus norvegicus translocase of outer mitochondrial membrane 34 (Tomm34), nuclear gene encoding mitochondrial protein, mRNA [NM_001044244] | 22,161 |
| 0          | M-phase phosphoprotein 8 [Source:RefSeq peptide;Acc:NP_001017375] [ENSRNOT00000028112]                                                      | 22,158 |
| Flrt1      | Rattus norvegicus fibronectin leucine rich transmembrane protein 1 (Flrt1), mRNA [NM_001109160]                                             | 22,154 |
| 0          | Glucose-6-phosphate 1-dehydrogenase [Source:UniProtKB/TrEMBL;Acc:D4A851] [ENSRNOT00000057468]                                               | 22,154 |
| Grina      | Rattus norvegicus glutamate receptor, ionotropic, N-methyl D-aspartate-associated protein 1 (glutamate binding) (Grina), mRNA [NM_153308]   | 22,154 |
| 0          | U2af2 protein [Source:UniProtKB/TrEMBL;Acc:Q5EB64] [ENSRNOT00000021391]                                                                     | 22,146 |
| Fgf2       | Rattus norvegicus fibroblast growth factor 2 (Fgf2), mRNA [NM_019305]                                                                       | 22,144 |
| Slc7a14    | Rattus norvegicus solute carrier family 7 (cationic amino acid transporter, y+ system), member 14 (Slc7a14), mRNA [NM_001134615]            | 22,143 |
| Sos1       | Rattus norvegicus Son of sevenless homolog 1 (Drosophila) (Sos1), mRNA [NM_001100716]                                                       | 22,143 |
| Tfg        | Rattus norvegicus Trk-fused gene (Tfg), mRNA [NM_001012144]                                                                                 | 22,142 |
| Syt17      | Rattus norvegicus synaptotagmin XVII (Syt17), mRNA [NM_138849]                                                                              | 22,142 |
| Fam43a     | Rattus norvegicus family with sequence similarity 43, member A (Fam43a), mRNA [NM_001039002]                                                | 22,140 |
| Fgd1       | Rattus norvegicus FYVE, RhoGEF and PH domain containing 1 (Fgd1), mRNA [NM_001037546]                                                       | 22,128 |
| Cygb       | Rattus norvegicus cytoglobin (Cygb), mRNA [NM_130744]                                                                                       | 22,125 |
| Hsd17b11   | Rattus norvegicus hydroxysteroid (17-beta) dehydrogenase 11 (Hsd17b11), mRNA [NM_001004209]                                                 | 22,121 |
| Slc43a2    | Rattus norvegicus solute carrier family 43, member 2 (Slc43a2), mRNA [NM_001105812]                                                         | 22,117 |
| 0          | RVL15663 Wackym-Soares normalized rat vestibular cDNA library Rattus norvegicus cDNA 5', mRNA sequence [DV723748]                           | 22,108 |
| Rnf216     | Rattus norvegicus ring finger protein 216 (Rnf216), mRNA [NM_001107122]                                                                     | 22,107 |
| Kcnq1      | Rattus norvegicus potassium voltage-gated channel, KQT-like subfamily, member 1 (Kcnq1), mRNA [NM_032073]                                   | 22,104 |
| Ext1       | Rattus norvegicus exostoses (multiple) 1 (Ext1), mRNA [NM_001130540]                                                                        | 22,094 |
| Ifnar1     | Rattus norvegicus interferon (alpha, beta and omega) receptor 1 (Ifnar1), mRNA [NM_001105893]                                               | 22,093 |
| Bsn        | Rattus norvegicus bassoon (Bsn), mRNA [NM_019146]                                                                                           | 22,093 |
| 0          | Unknown                                                                                                                                     | 22,091 |



|              |                                                                                                                                           |               |
|--------------|-------------------------------------------------------------------------------------------------------------------------------------------|---------------|
| Rap2ip       | Rattus norvegicus Rap2 interacting protein (Rap2ip), mRNA [NM_198758]                                                                     | <b>22,082</b> |
| Gcnt2        | Rattus norvegicus glucosaminyl (N-acetyl) transferase 2, I-branching enzyme (Gcnt2), mRNA [NM_001001511]                                  | <b>22,079</b> |
| LOC100360337 | PREDICTED: Rattus norvegicus zinc finger protein 128 (LOC100360337), mRNA [XM_002725494]                                                  | <b>22,078</b> |
| Lrfn1        | Rattus norvegicus leucine rich repeat and fibronectin type III domain containing 1 (Lrfn1), transcript variant 1, mRNA [NM_001127694]     | <b>22,076</b> |
| Lce1l        | Rattus norvegicus late cornified envelope 1L (Lce1l), mRNA [NM_001109493]                                                                 | <b>22,076</b> |
| Foxk1        | Rattus norvegicus forkhead box K1 (Foxk1), mRNA [NM_001037219]                                                                            | <b>22,070</b> |
| 0            | EST350998 Rat gene index, normalized rat, norvegicus, Bento Soares Rattus norvegicus cDNA clone RGIGF73 5' end, mRNA sequence [AW919694]  | <b>22,066</b> |
| Nf2          | Rattus norvegicus neurofibromin 2 (merlin) (Nf2), mRNA [NM_013193]                                                                        | <b>22,066</b> |
| Eif4g2       | Rattus norvegicus eukaryotic translation initiation factor 4, gamma 2 (Eif4g2), mRNA [NM_001017374]                                       | <b>22,063</b> |
| 0            | Uncharacterized protein [Source:UniProtKB/TrEMBL;Acc:D3ZR73] [ENSRNOT00000054883]                                                         | <b>22,062</b> |
| Sumo2        | Rattus norvegicus SMT3 suppressor of mif two 3 homolog 2 (S. cerevisiae) (Sumo2), mRNA [NM_133594]                                        | <b>22,056</b> |
| Sssca1       | Rattus norvegicus Sjogren's syndrome/scleroderma autoantigen 1 homolog (human) (Sssca1), mRNA [NM_001109537]                              | <b>22,054</b> |
| Cldn12       | Rattus norvegicus claudin 12 (Cldn12), mRNA [NM_001100813]                                                                                | <b>22,050</b> |
| Cacna1e      | Rattus norvegicus voltage-activated calcium channel alpha-1 subunit (rbe-ii) mRNA, complete cds. [L15453]                                 | <b>22,047</b> |
| Egfr         | Rattus norvegicus epidermal growth factor receptor (Egfr), mRNA [NM_031507]                                                               | <b>22,040</b> |
| Dlg3         | Rattus norvegicus discs, large homolog 3 (Drosophila) (Dlg3), mRNA [NM_031639]                                                            | <b>22,037</b> |
| Arhgef2      | Rattus norvegicus rho/rac guanine nucleotide exchange factor (GEF) 2 (Arhgef2), mRNA [NM_001012079]                                       | <b>22,034</b> |
| Id2          | Rattus norvegicus inhibitor of DNA binding 2 (Id2), mRNA [NM_013060]                                                                      | <b>22,026</b> |
| Eid1         | Rattus norvegicus EP300 interacting inhibitor of differentiation 1 (Eid1), mRNA [NM_001109205]                                            | <b>22,022</b> |
| Scgb1a1      | Rattus norvegicus secretoglobin, family 1A, member 1 (uteroglobin) (Scgb1a1), mRNA [NM_013051]                                            | <b>22,020</b> |
| Ncoa1        | Rattus norvegicus nuclear receptor coactivator 1 (Ncoa1), mRNA [NM_001108012]                                                             | <b>22,019</b> |
| Tmem185b     | Rattus norvegicus transmembrane protein 185B (Tmem185b), mRNA [NM_001191668]                                                              | <b>22,013</b> |
| Sorbs3       | Rattus norvegicus sorbin and SH3 domain containing 3 (Sorbs3), mRNA [NM_001005762]                                                        | <b>22,012</b> |
| LOC685890    | PREDICTED: Rattus norvegicus hypothetical protein LOC685890 (LOC685890), mRNA [XM_001065654]                                              | <b>22,008</b> |
| Tpm1         | Rattus norvegicus tropomyosin 1, alpha (Tpm1), transcript variant 2, mRNA [NM_001034069]                                                  | <b>22,002</b> |
| Zfp346       | Rattus norvegicus zinc finger protein 346 (Zfp346), mRNA [NM_001107338]                                                                   | <b>22,001</b> |
| Neto1        | Rattus norvegicus neuropilin (NRP) and tolloid (TLL)-like 1 (Neto1), mRNA [NM_001107371]                                                  | <b>21,999</b> |
| Trim5        | Rattus norvegicus tripartite motif-containing 5 (Trim5), mRNA [NM_001014023]                                                              | <b>21,995</b> |
| Gpr137       | Rattus norvegicus G protein-coupled receptor 137 (Gpr137), mRNA [NM_001109562]                                                            | <b>21,994</b> |
| Slc38a6      | Rattus norvegicus solute carrier family 38, member 6 (Slc38a6), mRNA [NM_001013099]                                                       | <b>21,989</b> |
| Spg20        | Rattus norvegicus spastic paraplegia 20 (Troyer syndrome) homolog (human) (Spg20), mRNA [NM_001106433]                                    | <b>21,987</b> |
| Cops7a       | Rattus norvegicus COP9 constitutive photomorphogenic homolog subunit 7A (Arabidopsis) (Cops7a), transcript variant 2, mRNA [NM_001047098] | <b>21,985</b> |
| Zfp39        | Rattus norvegicus zinc finger protein 39 (Zfp39), mRNA [NM_001107004]                                                                     | <b>21,975</b> |

|            |                                                                                                               |               |
|------------|---------------------------------------------------------------------------------------------------------------|---------------|
| RGD1311095 | Rattus norvegicus similar to hypothetical protein FLJ20259 (RGD1311095), mRNA [NM_001134532]                  | <b>21,974</b> |
| Il17b      | Rattus norvegicus interleukin 17B (Il17b), mRNA [NM_053789]                                                   | <b>21,972</b> |
| R3hdm1     | Rattus norvegicus R3H domain containing 1 (R3hdm1), mRNA [NM_001134867]                                       | <b>21,965</b> |
| E2f6       | Rattus norvegicus E2F transcription factor 6 (E2f6), mRNA [NM_001100717]                                      | <b>21,965</b> |
| 0          | Cytochrome c oxidase subunit 3 [Source:UniProtKB/Swiss-Prot;Acc:P05505] [ENSRNOT00000049683]                  | <b>21,961</b> |
| Sdc3       | Rattus norvegicus syndecan 3 (Sdc3), mRNA [NM_053893]                                                         | <b>21,957</b> |
| Ccdc49     | Rattus norvegicus coiled-coil domain containing 49 (Ccdc49), mRNA [NM_001108295]                              | <b>21,956</b> |
| Sap130     | Uncharacterized protein [Source:UniProtKB/TrEMBL;Acc:D3ZLP9] [ENSRNOT00000022761]                             | <b>21,947</b> |
| Faf2       | Rattus norvegicus Fas associated factor family member 2 (Faf2), mRNA [NM_001017445]                           | <b>21,947</b> |
| Kif3c      | Rattus norvegicus kinesin family member 3C (Kif3c), mRNA [NM_053486]                                          | <b>21,939</b> |
| 0          | Rattus norvegicus similar to cytoplasmic beta-actin (LOC302827), mRNA [XM_229147]                             | <b>21,933</b> |
| Exd2       | Rattus norvegicus exonuclease 3'-5' domain containing 2 (Exd2), mRNA [NM_001108715]                           | <b>21,931</b> |
| Pou3f2     | Rattus norvegicus POU class 3 homeobox 2 (Pou3f2), mRNA [NM_172085]                                           | <b>21,929</b> |
| Arhgdib    | Rattus norvegicus Rho, GDP dissociation inhibitor (GDI) beta (Arhgdib), mRNA [NM_001009600]                   | <b>21,926</b> |
| Stox2      | Rattus norvegicus storkhead box 2 (Stox2), transcript variant 2, mRNA [NM_173107]                             | <b>21,917</b> |
| Gtf3c5     | Rattus norvegicus general transcription factor IIIC, polypeptide 5 (Gtf3c5), mRNA [NM_001079941]              | <b>21,917</b> |
| 0          | Uncharacterized protein [Source:UniProtKB/TrEMBL;Acc:D3ZD05] [ENSRNOT00000014135]                             | <b>21,917</b> |
| Clcn3      | Rattus norvegicus chloride channel 3 (Clcn3), mRNA [NM_053363]                                                | <b>21,915</b> |
| 0          | Unknown                                                                                                       | <b>21,912</b> |
| B3gnt2     | Rattus norvegicus UDP-GlcNAc:betaGal beta-1,3-N-acetylglucosaminyltransferase 2 (B3gnt2), mRNA [NM_001107240] | <b>21,904</b> |
| Slc18a2    | Rattus norvegicus solute carrier family 18 (vesicular monoamine), member 2 (Slc18a2), mRNA [NM_013031]        | <b>21,901</b> |
| Apom       | Rattus norvegicus apolipoprotein M (Apom), mRNA [NM_019373]                                                   | <b>21,889</b> |
| 0          | Rattus norvegicus similar to lacrimal gland protein (LOC365230), mRNA [XM_344882]                             | <b>21,885</b> |
| Tcta       | Rattus norvegicus T-cell leukemia translocation altered gene (Tcta), mRNA [NM_001014005]                      | <b>21,882</b> |
| Prpc       | Rattus norvegicus prolylcarboxypeptidase (angiotensinase C) (Prpc), mRNA [NM_001106281]                       | <b>21,877</b> |
| 0          | FQ099121 Rattus norvegicus brain Sprague-Dawley Rattus norvegicus cDNA 5', mRNA sequence [FQ099121]           | <b>21,871</b> |
| 0          | Uncharacterized protein [Source:UniProtKB/TrEMBL;Acc:D3ZJE3] [ENSRNOT00000057150]                             | <b>21,861</b> |
| Ahcyl2     | Rattus norvegicus adenosylhomocysteinase-like 2 (Ahcyl2), mRNA [NM_001173510]                                 | <b>21,852</b> |
| Zfp192     | Rattus norvegicus zinc finger protein 192 (Zfp192), mRNA [NM_001100574]                                       | <b>21,841</b> |
| Vldlr      | Rattus norvegicus very low density lipoprotein receptor (Vldlr), mRNA [NM_013155]                             | <b>21,840</b> |
| Ahrr       | Rattus norvegicus aryl-hydrocarbon receptor repressor (Ahrr), mRNA [NM_001024285]                             | <b>21,839</b> |
| Ep300      | PREDICTED: Rattus norvegicus E1A binding protein p300 (Ep300), mRNA [XM_576312]                               | <b>21,831</b> |
| Fam120a    | Rattus norvegicus family with sequence similarity 120A (Fam120a), mRNA [NM_001191816]                         | <b>21,829</b> |
| Nhp2l1     | Rattus norvegicus NHP2 non-histone chromosome protein 2-like 1 (S. cerevisiae) (Nhp2l1), mRNA [NM_212515]     | <b>21,822</b> |

|            |                                                                                                                            |        |
|------------|----------------------------------------------------------------------------------------------------------------------------|--------|
| Efr3a      | Rattus norvegicus EFR3 homolog A ( <i>S. cerevisiae</i> ) (Efr3a), mRNA [NM_001130564]                                     | 21,821 |
| Fam3a      | Rattus norvegicus family with sequence similarity 3, member A (Fam3a), mRNA [NM_001109324]                                 | 21,819 |
| 0          | Unknown                                                                                                                    | 21,819 |
| Rcor3      | Rattus norvegicus REST corepressor 3 (Rcor3), mRNA [NM_001134985]                                                          | 21,818 |
| RGD1305733 | Rattus norvegicus similar to RIKEN cDNA 2900011O08 (RGD1305733), mRNA [NM_001014114]                                       | 21,816 |
| 0          | Rattus norvegicus similar to mKIAA1107 protein (LOC305122), mRNA [XM_223143]                                               | 21,809 |
| Cks2       | Rattus norvegicus CDC28 protein kinase regulatory subunit 2 (Cks2), mRNA [NM_001126083]                                    | 21,802 |
| 0          | Unknown                                                                                                                    | 21,795 |
| Dclk1      | Rattus norvegicus doublecortin-like kinase 1 (Dclk1), transcript variant 1, mRNA [NM_053343]                               | 21,793 |
| Mfap3      | Rattus norvegicus microfibrillar-associated protein 3 (Mfap3), mRNA [NM_001007609]                                         | 21,792 |
| 0          | Unknown                                                                                                                    | 21,792 |
| Calb2      | Rattus norvegicus calbindin 2 (Calb2), mRNA [NM_053988]                                                                    | 21,778 |
| 0          | Unknown                                                                                                                    | 21,775 |
| Rnf13      | Rattus norvegicus ring finger protein 13 (Rnf13), mRNA [NM_001109444]                                                      | 21,775 |
| Grb10      | Rattus norvegicus growth factor receptor bound protein 10 (Grb10), mRNA [NM_001109093]                                     | 21,771 |
| Grem2      | Rattus norvegicus gremlin 2, cysteine knot superfamily, homolog ( <i>Xenopus laevis</i> ) (Grem2), mRNA [NM_001105974]     | 21,770 |
| Pcdhb2     | Rattus norvegicus protocadherin beta 2 (Pcdhb2), mRNA [NM_001109123]                                                       | 21,769 |
| Fam131b    | Rattus norvegicus family with sequence similarity 131, member B (Fam131b), mRNA [NM_001025046]                             | 21,764 |
| 0          | Rattus norvegicus strain F344 hepatocyte malignant transforming factor mRNA, complete sequence. [GU969272]                 | 21,753 |
| Lrrc61     | Rattus norvegicus leucine rich repeat containing 61 (Lrrc61), mRNA [NM_001109231]                                          | 21,753 |
| Rere       | Rattus norvegicus arginine-glutamic acid dipeptide (RE) repeats (Rere), mRNA [NM_053885]                                   | 21,727 |
| RGD1310552 | Rattus norvegicus similar to hypothetical protein MGC38960 (RGD1310552), mRNA [NM_001106838]                               | 21,727 |
| Grb2       | Rattus norvegicus growth factor receptor bound protein 2 (Grb2), mRNA [NM_030846]                                          | 21,725 |
| Per3       | Rattus norvegicus period homolog 3 ( <i>Drosophila</i> ) (Per3), mRNA [NM_023978]                                          | 21,720 |
| Pvrl2      | Rattus norvegicus poliovirus receptor-related 2 (Pvrl2), mRNA [NM_001012064]                                               | 21,718 |
| Polr3f     | Rattus norvegicus polymerase (RNA) III (DNA directed) polypeptide F (Polr3f), mRNA [NM_001107784]                          | 21,706 |
| Slc16a14   | Rattus norvegicus solute carrier family 16, member 14 (monocarboxylic acid transporter 14) (Slc16a14), mRNA [NM_001108229] | 21,706 |
| Rrp7a      | Rattus norvegicus ribosomal RNA processing 7 homolog A ( <i>S. cerevisiae</i> ) (Rrp7a), mRNA [NM_001130568]               | 21,698 |
| Abhd12     | Rattus norvegicus abhydrolase domain containing 12 (Abhd12), mRNA [NM_001024314]                                           | 21,690 |
| Rnf126     | Rattus norvegicus ring finger protein 126 (Rnf126), mRNA [NM_001033702]                                                    | 21,678 |
| Eif2c2     | Rattus norvegicus eukaryotic translation initiation factor 2C, 2 (Eif2c2), mRNA [NM_021597]                                | 21,670 |
| 0          | Unknown                                                                                                                    | 21,667 |
| Pear1      | Rattus norvegicus platelet endothelial aggregation receptor 1 (Pear1), mRNA [NM_001134959]                                 | 21,665 |
| Pabpc1     | Rattus norvegicus poly(A) binding protein, cytoplasmic 1 (Pabpc1), mRNA [NM_134353]                                        | 21,664 |

|            |                                                                                                                        |        |
|------------|------------------------------------------------------------------------------------------------------------------------|--------|
| Eraf       | Rattus norvegicus erythroid associated factor (Eraf), mRNA [NM_001106299]                                              | 21,661 |
| LOC679547  | PREDICTED: Rattus norvegicus hypothetical protein LOC679547 (LOC679547), mRNA [XM_002724484]                           | 21,630 |
| 0          | Unknown                                                                                                                | 21,619 |
| 0          | Unknown                                                                                                                | 21,612 |
| Etnk1      | Rattus norvegicus ethanolamine kinase 1 (Etnk1), mRNA [NM_001107894]                                                   | 21,604 |
| Col5a3     | Rattus norvegicus collagen, type V, alpha 3 (Col5a3), mRNA [NM_021760]                                                 | 21,604 |
| 0          | Unknown                                                                                                                | 21,602 |
| Mxd4       | Rattus norvegicus Max dimerization protein 4 (Mxd4), mRNA [NM_001108364]                                               | 21,591 |
| Ncoa5      | Rattus norvegicus nuclear receptor coactivator 5 (Ncoa5), mRNA [NM_001106543]                                          | 21,590 |
| Gapt       | Rattus norvegicus Grb2-binding adaptor protein, transmembrane (Gapt), mRNA [NM_001109491]                              | 21,585 |
| Ssh3       | Rattus norvegicus slingshot homolog 3 (Drosophila) (Ssh3), mRNA [NM_001012217]                                         | 21,581 |
| 0          | Unknown                                                                                                                | 21,577 |
| Plbd2      | Rattus norvegicus phospholipase B domain containing 2 (Plbd2), mRNA [NM_139255]                                        | 21,574 |
| Pdgfrb     | Rattus norvegicus platelet derived growth factor receptor, beta polypeptide (Pdgfrb), mRNA [NM_031525]                 | 21,571 |
| Fbxl17     | Rattus norvegicus F-box and leucine-rich repeat protein 17 (Fbxl17), mRNA [NM_001108235]                               | 21,561 |
| Alcam      | Rattus norvegicus activated leukocyte cell adhesion molecule (Alcam), mRNA [NM_031753]                                 | 21,560 |
| Cks1b      | Rattus norvegicus CDC28 protein kinase regulatory subunit 1B (Cks1b), mRNA [NM_001135749]                              | 21,557 |
| RGD1307682 | Rattus norvegicus similar to hypothetical protein FLJ21827 (RGD1307682), mRNA [NM_001024760]                           | 21,554 |
| Chtf8      | Rattus norvegicus CTF8, chromosome transmission fidelity factor 8 homolog (S. cerevisiae) (Chtf8), mRNA [NM_001194951] | 21,553 |
| 0          | Unknown                                                                                                                | 21,553 |
| Myot       | Rattus norvegicus myotilin (Myot), mRNA [NM_001106148]                                                                 | 21,552 |
| Dnah11     | PREDICTED: Rattus norvegicus dynein, axonemal, heavy chain 11 (Dnah11), mRNA [XM_001061747]                            | 21,551 |
| 0          | Unknown                                                                                                                | 21,551 |
| Myo16      | Rattus norvegicus myosin XVI (Myo16), mRNA [NM_138893]                                                                 | 21,548 |
| Tpi1       | Rattus norvegicus triosephosphate isomerase 1 (Tpi1), mRNA [NM_022922]                                                 | 21,544 |
| Add3       | Rattus norvegicus adducin 3 (gamma) (Add3), transcript variant 1, mRNA [NM_001164103]                                  | 21,523 |
| Ren        | Rattus norvegicus renin (Ren), mRNA [NM_012642]                                                                        | 21,522 |
| 0          | RCG22732Uncharacterized protein [Source:UniProtKB/TrEMBL;Acc:D3ZEH2] [ENSRNOT00000037521]                              | 21,522 |
| Zbtb44     | Rattus norvegicus zinc finger and BTB domain containing 44 (Zbtb44), mRNA [NM_001034942]                               | 21,522 |
| Blcap      | Rattus norvegicus bladder cancer associated protein homolog (human) (Blcap), mRNA [NM_133582]                          | 21,520 |
| Lmbrd2     | Rattus norvegicus LMBR1 domain containing 2 (Lmbrd2), mRNA [NM_001109177]                                              | 21,517 |
| 0          | Unknown                                                                                                                | 21,512 |
| Zmiz1      | Rattus norvegicus zinc finger, MIZ-type containing 1 (Zmiz1), mRNA [NM_001108393]                                      | 21,512 |
| Nr4a2      | Rattus norvegicus nuclear receptor subfamily 4, group A, member 2 (Nr4a2), mRNA [NM_019328]                            | 21,510 |

|          |                                                                                                                             |        |
|----------|-----------------------------------------------------------------------------------------------------------------------------|--------|
| Sh3bgrl  | Rattus norvegicus SH3 domain binding glutamic acid-rich protein like (Sh3bgrl), mRNA [NM_001173339]                         | 21,509 |
| Ube2l6   | Rattus norvegicus ubiquitin-conjugating enzyme E2L 6 (Ube2l6), mRNA [NM_001024755]                                          | 21,507 |
| 0        | Unknown                                                                                                                     | 21,505 |
| Zyx      | Rattus norvegicus zyxin (Zyx), mRNA [NM_053761]                                                                             | 21,502 |
| 0        | telomerase-binding protein EST1A [Source:RefSeq peptide;Acc:NP_001099278] [ENSRNOT00000052412]                              | 21,500 |
| 0        | Unknown                                                                                                                     | 21,494 |
| Csnk1g1  | Rattus norvegicus casein kinase 1, gamma 1 (Csnk1g1), mRNA [NM_022288]                                                      | 21,490 |
| 0        | Unknown                                                                                                                     | 21,490 |
| 0        | Unknown                                                                                                                     | 21,488 |
| 0        | Unknown                                                                                                                     | 21,485 |
| Serf2    | Rattus norvegicus small EDRK-rich factor 2 (Serf2), mRNA [NM_001098782]                                                     | 21,471 |
| Fam36a   | Rattus norvegicus family with sequence similarity 36, member A (Fam36a), mRNA [NM_001105976]                                | 21,470 |
| Th       | Rattus norvegicus tyrosine hydroxylase (Th), mRNA [NM_012740]                                                               | 21,468 |
| Tmem231  | Transmembrane protein 231 [Source:UniProtKB/Swiss-Prot;Acc:Q5FVM1] [ENSRNOT00000031243]                                     | 21,463 |
| Pcdhac2  | Rattus norvegicus protocadherin alpha subfamily C, 2 (Pcdhac2), mRNA [NM_201422]                                            | 21,459 |
| Eef2k    | Eukaryotic elongation factor 2 kinase [Source:UniProtKB/Swiss-Prot;Acc:P70531] [ENSRNOT00000022726]                         | 21,458 |
| 39508    | Rattus norvegicus membrane-associated ring finger (C3HC4) 8 (March8), mRNA [NM_001107882]                                   | 21,448 |
| Vwa5b1   | Rattus norvegicus von Willebrand factor A domain containing 5B1 (Vwa5b1), mRNA [NM_001107988]                               | 21,439 |
| Arl5a    | Rattus norvegicus ADP-ribosylation factor-like 5A (Arl5a), mRNA [NM_053979]                                                 | 21,436 |
| 0        | Unknown                                                                                                                     | 21,433 |
| Zfp84    | Rattus norvegicus zinc finger protein 84 (Zfp84), mRNA [NM_001107500]                                                       | 21,425 |
| Rasgef1a | PREDICTED: Rattus norvegicus RasGEF domain family, member 1A (Rasgef1a), mRNA [XM_232315]                                   | 21,418 |
| 0        | Unknown                                                                                                                     | 21,413 |
| Lgals9   | Rattus norvegicus lectin, galactoside-binding, soluble, 9 (Lgals9), mRNA [NM_012977]                                        | 21,412 |
| 0        | UI-R-C0-hz-h-08-0-UI.s1 UI-R-C0 Rattus norvegicus cDNA clone UI-R-C0-hz-h-08-0-UI 3', mRNA sequence [AA998304]              | 21,412 |
| Rnf26    | Rattus norvegicus ring finger protein 26 (Rnf26), mRNA [NM_001113748]                                                       | 21,406 |
| Slc10a3  | Rattus norvegicus solute carrier family 10 (sodium/bile acid cotransporter family), member 3 (Slc10a3), mRNA [NM_001024368] | 21,404 |
| Rundc3b  | Rattus norvegicus RUN domain containing 3B (Rundc3b), mRNA [NM_001047116]                                                   | 21,403 |
| 0        | Unknown                                                                                                                     | 21,395 |
| Dusp16   | Rattus norvegicus dual specificity phosphatase 16 (Dusp16), mRNA [NM_001106624]                                             | 21,394 |
| Rab6a    | Rattus norvegicus RAB6A, member RAS oncogene family (Rab6a), mRNA [NM_053366]                                               | 21,391 |
| 0        | Unknown                                                                                                                     | 21,379 |
| Ube2cbp  | Rattus norvegicus ubiquitin-conjugating enzyme E2C binding protein (Ube2cbp), mRNA [NM_001039610]                           | 21,378 |
| Crat     | Rattus norvegicus carnitine acetyltransferase (Crat), nuclear gene encoding mitochondrial protein, mRNA [NM_001004085]      | 21,375 |

|           |                                                                                                                                                  |        |
|-----------|--------------------------------------------------------------------------------------------------------------------------------------------------|--------|
| Utrn      | Rattus norvegicus utrophin (Utrn), mRNA [NM_013070]                                                                                              | 21,369 |
| 0         | Unknown                                                                                                                                          | 21,368 |
| Plagl2    | Rattus norvegicus pleiomorphic adenoma gene-like 2 (Plagl2), mRNA [NM_001106528]                                                                 | 21,365 |
| Epm2a     | Laforin [Source:UniProtKB/Swiss-Prot;Acc:Q91XQ2] [ENSRNOT00000061930]                                                                            | 21,365 |
| 0         | Rattus norvegicus, 15 clones, strain BN/SsNHsdMCW RNOR03326388, whole genome shotgun sequence [AABR03129123]                                     | 21,355 |
| Hnf1b     | Rattus norvegicus HNF1 homeobox B (Hnf1b), mRNA [NM_013103]                                                                                      | 21,352 |
| 0         | Unknown                                                                                                                                          | 21,349 |
| Accn1     | Rattus norvegicus amiloride-sensitive cation channel 1, neuronal (Accn1), transcript variant 1, mRNA [NM_012892]                                 | 21,347 |
| Irf2      | Rattus norvegicus interferon regulatory factor 2 (Irf2), mRNA [NM_001047086]                                                                     | 21,347 |
| Epb41I4a  | Rattus norvegicus erythrocyte membrane protein band 4.1 like 4A (Epb41I4a), mRNA [NM_001107397]                                                  | 21,346 |
| Tmem176b  | Rattus norvegicus transmembrane protein 176B (Tmem176b), mRNA [NM_134390]                                                                        | 21,340 |
| LOC684861 | PREDICTED: Rattus norvegicus similar to Indoleamine 2,3-dioxygenase (IDO) (Indoleamine-pyrrole 2,3-dioxygenase) (LOC684861), mRNA [XM_001072229] | 21,337 |
| Bcl6b     | Rattus norvegicus B-cell CLL/lymphoma 6, member B (zinc finger protein) (Bcl6b), mRNA [NM_001108279]                                             | 21,336 |
| Ythdf1    | Rattus norvegicus YTH domain family, member 1 (Ythdf1), mRNA [NM_001024756]                                                                      | 21,332 |
| Cx3cr1    | Rattus norvegicus chemokine (C-X3-C motif) receptor 1 (Cx3cr1), mRNA [NM_133534]                                                                 | 21,332 |
| 0         | UI-R-FJ0-cpz-f-19-0-UI.r1 UI-R-FJ0 Rattus norvegicus cDNA clone UI-R-FJ0-cpz-f-19-0-UI 5', mRNA sequence [CA512374]                              | 21,331 |
| 0         | RVL16467 Wackym-Soares normalized rat vestibular cDNA library Rattus norvegicus cDNA 5', mRNA sequence [DV724416]                                | 21,328 |
| 0         | Unknown                                                                                                                                          | 21,326 |
| 0         | Unknown                                                                                                                                          | 21,323 |
| Apobec1   | Rattus norvegicus apolipoprotein B mRNA editing enzyme, catalytic polypeptide 1 (Apobec1), mRNA [NM_012907]                                      | 21,318 |
| Jph1      | Rattus norvegicus junctophilin 1 (Jph1), mRNA [NM_001106630]                                                                                     | 21,294 |
| Mmgt2     | Rattus norvegicus membrane magnesium transporter 2 (Mmgt2), mRNA [NM_001013967]                                                                  | 21,292 |
| Ypel5     | Rattus norvegicus yippee-like 5 (Drosophila) (Ypel5), mRNA [NM_001035221]                                                                        | 21,290 |
| Atxn7I2   | Uncharacterized protein [Source:UniProtKB/TrEMBL;Acc:D4A9B8] [ENSRNOT00000037336]                                                                | 21,290 |
| Pygo1     | Rattus norvegicus pygopus 1 (Pygo1), mRNA [NM_001191117]                                                                                         | 21,281 |
| BrunoI4   | Rattus norvegicus bruno-like 4, RNA binding protein (Drosophila) (BrunoI4), mRNA [NM_001107400]                                                  | 21,278 |
| Ccdc6     | Uncharacterized protein [Source:UniProtKB/TrEMBL;Acc:D4AEK9] [ENSRNOT00000032159]                                                                | 21,275 |
| Tp53inp2  | Tumor protein p53-inducible nuclear protein 2 [Source:UniProtKB/Swiss-Prot;Acc:Q8CHM3] [ENSRNOT00000055310]                                      | 21,273 |
| Taf12     | Rattus norvegicus TAF12 RNA polymerase II, TATA box binding protein (TBP)-associated factor (Taf12), mRNA [NM_001115036]                         | 21,266 |
| Rpp25     | Rattus norvegicus ribonuclease P 25 subunit (human) (Rpp25), mRNA [NM_001012124]                                                                 | 21,266 |
| Hapln4    | Rattus norvegicus hyaluronan and proteoglycan link protein 4 (Hapln4), mRNA [NM_001108398]                                                       | 21,259 |
| Znf142    | Rattus norvegicus zinc finger protein 142 (Znf142), mRNA [NM_001108225]                                                                          | 21,258 |
| Ube2v1    | Rattus norvegicus ubiquitin-conjugating enzyme E2 variant 1 (Ube2v1), mRNA [NM_001110345]                                                        | 21,258 |

|            |                                                                                                                                                            |               |
|------------|------------------------------------------------------------------------------------------------------------------------------------------------------------|---------------|
| Bicd1      | Rattus norvegicus bicaudal D homolog 1 (Drosophila) (Bicd1), mRNA [NM_001108653]                                                                           | <b>21,247</b> |
| 0          | Unknown                                                                                                                                                    | <b>21,245</b> |
| Hn1        | Rattus norvegicus hematological and neurological expressed 1 (Hn1), mRNA [NM_001005876]                                                                    | <b>21,242</b> |
| Pdgfa      | Rattus norvegicus platelet-derived growth factor alpha polypeptide (Pdgfa), mRNA [NM_012801]                                                               | <b>21,241</b> |
| Zbtb20     | Rattus norvegicus zinc finger and BTB domain containing 20 (Zbtb20), mRNA [NM_001105880]                                                                   | <b>21,233</b> |
| 0          | Unknown                                                                                                                                                    | <b>21,232</b> |
| LOC684800  | PREDICTED: Rattus norvegicus similar to stromal membrane-associated protein 1, transcript variant 2 (LOC684800), mRNA [XM_002727177]                       | <b>21,230</b> |
| S100a5     | Rattus norvegicus S100 calcium binding protein A5 (S100a5), mRNA [NM_001106438]                                                                            | <b>21,227</b> |
| Slc25a18   | Rattus norvegicus solute carrier family 25 (mitochondrial carrier), member 18 (Slc25a18), nuclear gene encoding mitochondrial protein, mRNA [NM_001044280] | <b>21,219</b> |
| Ogdh       | Rattus norvegicus oxoglutarate (alpha-ketoglutarate) dehydrogenase (lipoamide) (Ogdh), nuclear gene encoding mitochondrial protein, mRNA [NM_001017461]    | <b>21,207</b> |
| Spry3      | Rattus norvegicus sprouty homolog 3 (Drosophila) (Spry3), mRNA [NM_001109063]                                                                              | <b>21,203</b> |
| 0          | Uncharacterized protein [Source:UniProtKB/TrEMBL;Acc:D4A533] [ENSRNOT00000004274]                                                                          | <b>21,201</b> |
| 0          | Unknown                                                                                                                                                    | <b>21,189</b> |
| Ikzf5      | Rattus norvegicus IKAROS family zinc finger 5 (Ikzf5), mRNA [NM_001107555]                                                                                 | <b>21,187</b> |
| Grb10      | Rattus norvegicus growth factor receptor bound protein 10 (Grb10), mRNA [NM_001109093]                                                                     | <b>21,185</b> |
| Hgs        | Rattus norvegicus hepatocyte growth factor-regulated tyrosine kinase substrate (Hgs), mRNA [NM_019387]                                                     | <b>21,184</b> |
| Acap3      | Rattus norvegicus ArfGAP with coiled-coil, ankyrin repeat and PH domains 3 (Acap3), mRNA [NM_001107999]                                                    | <b>21,180</b> |
| 0          | Unknown                                                                                                                                                    | <b>21,176</b> |
| Reep1      | Rattus norvegicus receptor accessory protein 1 (Reep1), nuclear gene encoding mitochondrial protein, mRNA [NM_001108633]                                   | <b>21,165</b> |
| 0          | Unknown                                                                                                                                                    | <b>21,156</b> |
| Gga1       | Rattus norvegicus golgi associated, gamma adaptin ear containing, ARF binding protein 1 (Gga1), mRNA [NM_001011994]                                        | <b>21,148</b> |
| Abl1       | Rattus norvegicus c-abl oncogene 1, receptor tyrosine kinase (Abl1), mRNA [NM_001100850]                                                                   | <b>21,142</b> |
| 0          | Unknown                                                                                                                                                    | <b>21,140</b> |
| Pcdh17     | Rattus norvegicus protocadherin 17 (Pcdh17), mRNA [NM_001107279]                                                                                           | <b>21,138</b> |
| 0          | Unknown                                                                                                                                                    | <b>21,127</b> |
| Obfc2b     | Rattus norvegicus oligonucleotide/oligosaccharide-binding fold containing 2B (Obfc2b), mRNA [NM_001034939]                                                 | <b>21,125</b> |
| Dcaf5      | Rattus norvegicus DDB1 and CUL4 associated factor 5 (Dcaf5), nuclear gene encoding mitochondrial protein, mRNA [NM_001100718]                              | <b>21,116</b> |
| RGD1303130 | Rattus norvegicus kidney predominant protein NCU-G1 (RGD1303130), mRNA [NM_001004226]                                                                      | <b>21,115</b> |
| Syng2      | Rattus norvegicus synaptogyrin 2 (Syng2), mRNA [NM_053553]                                                                                                 | <b>21,112</b> |
| 0          | Unknown                                                                                                                                                    | <b>21,103</b> |
| Nek11      | Rattus norvegicus NIMA (never in mitosis gene a)- related kinase 11 (Nek11), mRNA [NM_001108182]                                                           | <b>21,100</b> |
| Cacng6     | Rattus norvegicus calcium channel, voltage-dependent, gamma subunit 6 (Cacng6), mRNA [NM_080694]                                                           | <b>21,097</b> |

|            |                                                                                                                                                                  |        |
|------------|------------------------------------------------------------------------------------------------------------------------------------------------------------------|--------|
| Trib2      | Rattus norvegicus TL0AEA74YF17 mRNA sequence. [FQ231260]                                                                                                         | 21,084 |
| Arcn1      | Rattus norvegicus archain 1 (Arcn1), mRNA [NM_001007662]                                                                                                         | 21,078 |
| Selm       | Rattus norvegicus selenoprotein M (Selm), mRNA [NM_001115013]                                                                                                    | 21,078 |
| RGD1304595 | Rattus norvegicus similar to RIKEN cDNA 6330416G13 gene (RGD1304595), mRNA [NM_001106661]                                                                        | 21,078 |
| 0          | Unknown                                                                                                                                                          | 21,071 |
| LOC501979  | PREDICTED: Rattus norvegicus similar to ATPase, H+ transporting, V1 subunit F (LOC501979), mRNA [XM_577408]                                                      | 21,061 |
| Mbnl2      | Rattus norvegicus muscleblind-like 2 (Mbnl2), mRNA [NM_001111064]                                                                                                | 21,059 |
| Elovl2     | Rattus norvegicus elongation of very long chain fatty acids (FEN1/Elo2, SUR4/Elo3, yeast)-like 2 (Elovl2), mRNA [NM_001109118]                                   | 21,057 |
| Scd4       | Uncharacterized protein [Source:UniProtKB/TrEMBL;Acc:D3ZNA4] [ENSRNOT00000017834]                                                                                | 21,056 |
| Snap25     | Rattus norvegicus synaptosomal-associated protein 25 (Snap25), mRNA [NM_030991]                                                                                  | 21,054 |
| 0          | Unknown                                                                                                                                                          | 21,051 |
| MGC94542   | Rattus norvegicus similar to RIKEN cDNA 5430437P03 (MGC94542), mRNA [NM_001006964]                                                                               | 21,046 |
| Aanat      | Rattus norvegicus arylalkylamine N-acetyltransferase (Aanat), mRNA [NM_012818]                                                                                   | 21,045 |
| Sema4d     | Rattus norvegicus sema domain, immunoglobulin domain (Ig), transmembrane domain (TM) and short cytoplasmic domain, (semaphorin) 4D (Sema4d), mRNA [NM_001170563] | 21,044 |
| Car7       | Rattus norvegicus carbonic anhydrase 7 (Car7), mRNA [NM_001106165]                                                                                               | 21,041 |
| Caskin2    | Rattus norvegicus cask-interacting protein 2 (Caskin2), mRNA [NM_001107065]                                                                                      | 21,040 |
| RGD1310769 | Rattus norvegicus similar to HSPC288 (RGD1310769), mRNA [NM_001106749]                                                                                           | 21,037 |
| Masp1      | Rattus norvegicus mannan-binding lectin serine peptidase 1 (Masp1), mRNA [NM_022257]                                                                             | 21,035 |
| Mta2       | Rattus norvegicus metastasis associated 1 family, member 2 (Mta2), mRNA [NM_001100740]                                                                           | 21,032 |
| Nudt16l1   | Rattus norvegicus nudix (nucleoside diphosphate linked moiety X)-type motif 16-like 1 (Nudt16l1), mRNA [NM_001100782]                                            | 21,031 |
| 0          | Unknown                                                                                                                                                          | 21,031 |
| 0          | XM_750817 gamma-tubulin complex component GCP4 {Aspergillus fumigatus Af293} (exp=-1; wgp=0; cg=0), partial (3%) [TC606369]                                      | 21,028 |
| Pou6f1     | Rattus norvegicus POU class 6 homeobox 1 (Pou6f1), mRNA [NM_001105746]                                                                                           | 21,028 |
| Aig1       | Rattus norvegicus androgen-induced 1 (Aig1), mRNA [NM_001134425]                                                                                                 | 21,025 |
| Vom1r30    | Rattus norvegicus vomeronasal 1 receptor 30 (Vom1r30), mRNA [NM_001009511]                                                                                       | 21,018 |
| Fitm2      | Rattus norvegicus fat storage-inducing transmembrane protein 2 (Fitm2), mRNA [NM_001107799]                                                                      | 21,011 |
| Gatsl3     | Rattus norvegicus GATS protein-like 3 (Gatsl3), mRNA [NM_001025128]                                                                                              | 21,002 |
| Dbt        | Rattus norvegicus dihydrolipoamide branched chain transacylase E2 (Dbt), nuclear gene encoding mitochondrial protein, mRNA [NM_053312]                           | 21,000 |
| Cdr2       | Rattus norvegicus cerebellar degeneration-related 2 (Cdr2), mRNA [NM_001025682]                                                                                  | 20,997 |
| Ubxn2a     | Rattus norvegicus UBX domain protein 2A (Ubxn2a), mRNA [NM_001109482]                                                                                            | 20,992 |
| Rarres1    | Rattus norvegicus retinoic acid receptor responder (tazarotene induced) 1 (Rarres1), mRNA [NM_001014790]                                                         | 20,986 |
| Rimbp2     | Rattus norvegicus RIM binding protein 2 (Rimbp2), mRNA [NM_001100488]                                                                                            | 20,985 |
| Ensa       | Rattus norvegicus endosulfine alpha (Ensa), transcript variant 2, mRNA [NM_021842]                                                                               | 20,981 |



|            |                                                                                                                               |        |
|------------|-------------------------------------------------------------------------------------------------------------------------------|--------|
| Arhgef7    | Rattus norvegicus Rho guanine nucleotide exchange factor (GEF7) (Arhgef7), transcript variant 3, mRNA [NM_053740]             | 20,979 |
| Samd14     | Rattus norvegicus sterile alpha motif domain containing 14 (Samd14), mRNA [NM_001024966]                                      | 20,978 |
| 0          | Unknown                                                                                                                       | 20,973 |
| Foxk2      | Rattus norvegicus forkhead box K2 (Foxk2), mRNA [NM_001107075]                                                                | 20,970 |
| Gorasp1    | Rattus norvegicus golgi reassembly stacking protein 1 (Gorasp1), mRNA [NM_019385]                                             | 20,966 |
| Art5       | Rattus norvegicus ADP-ribosyltransferase 5 (Art5), mRNA [NM_001013039]                                                        | 20,965 |
| Papd4      | Rattus norvegicus PAP associated domain containing 4 (Papd4), mRNA [NM_001008372]                                             | 20,963 |
| Hhip1      | Uncharacterized protein [Source:UniProtKB/TrEMBL;Acc:D3ZJC9] [ENSRNOT00000034883]                                             | 20,963 |
| Mad2l1bp   | Rattus norvegicus MAD2L1 binding protein (Mad2l1bp), mRNA [NM_001009699]                                                      | 20,962 |
| Ulk1       | Rattus norvegicus Unc-51 like kinase 1 (C. elegans) (Ulk1), mRNA [NM_001108341]                                               | 20,960 |
| Nfasc      | Rattus norvegicus neurofascin (Nfasc), transcript variant 1, mRNA [NM_001160314]                                              | 20,955 |
| Rab31      | Rattus norvegicus RAB31, member RAS oncogene family (Rab31), mRNA [NM_145094]                                                 | 20,949 |
| Sfrs1      | Rattus norvegicus splicing factor, arginine/serine-rich 1 (Sfrs1), mRNA [NM_001109552]                                        | 20,945 |
| Rhbdf1     | Rattus norvegicus rhomboid 5 homolog 1 (Drosophila) (Rhbdf1), mRNA [NM_001030034]                                             | 20,943 |
| Tesb       | Rattus norvegicus testis specific basic protein (Tesb), mRNA [NM_001113183]                                                   | 20,941 |
| Vps4a      | Rattus norvegicus vacuolar protein sorting 4 homolog A (S. cerevisiae) (Vps4a), mRNA [NM_145678]                              | 20,940 |
| Itgb5      | Rattus norvegicus integrin, beta 5 (Itgb5), mRNA [NM_147139]                                                                  | 20,938 |
| Nono       | Rattus norvegicus non-POU domain containing, octamer-binding (Nono), mRNA [NM_001012356]                                      | 20,929 |
| LOC679168  | PREDICTED: Rattus norvegicus hypothetical protein LOC679168 (LOC679168), mRNA [XM_001055022]                                  | 20,929 |
| RGD1566399 | PREDICTED: Rattus norvegicus similar to MYST histone acetyltransferase monocytic leukemia 4 (RGD1566399), miscRNA [XR_008228] | 20,928 |
| Calm1      | Rattus norvegicus calmodulin 1 (Calm1), mRNA [NM_031969]                                                                      | 20,926 |
| Stim2      | Rattus norvegicus stromal interaction molecule 2 (Stim2), mRNA [NM_001105750]                                                 | 20,918 |
| Ints7      | Rattus norvegicus integrator complex subunit 7 (Ints7), mRNA [NM_001191675]                                                   | 20,909 |
| Slc24a5    | Rattus norvegicus solute carrier family 24, member 5 (Slc24a5), mRNA [NM_001107769]                                           | 20,898 |
| Fam117b    | Rattus norvegicus family with sequence similarity 117, member B (Fam117b), mRNA [NM_001108797]                                | 20,896 |
| 0          | Unknown                                                                                                                       | 20,888 |
| 0          | Unknown                                                                                                                       | 20,886 |
| RGD1306186 | Rattus norvegicus similar to RIKEN cDNA 4930569K13 (RGD1306186), mRNA [NM_001024986]                                          | 20,881 |
| 0          | Rattus norvegicus cDNA clone IMAGE:7314743. [BC089965]                                                                        | 20,871 |
| Oaz3       | Rattus norvegicus ornithine decarboxylase antizyme 3 (Oaz3), mRNA [NM_001101018]                                              | 20,850 |
| Katnal1    | Rattus norvegicus katanin p60 subunit A-like 1 (Katnal1), mRNA [NM_001006956]                                                 | 20,849 |
| 0          | Unknown                                                                                                                       | 20,848 |
| Vasn       | Rattus norvegicus vasorin (Vasn), mRNA [NM_001109382]                                                                         | 20,848 |
| Olr472     | Rattus norvegicus olfactory receptor 472 (Olr472), mRNA [NM_001000301]                                                        | 20,847 |

|           |                                                                                                                                                  |        |
|-----------|--------------------------------------------------------------------------------------------------------------------------------------------------|--------|
| Casp2     | Rattus norvegicus caspase 2 (Casp2), mRNA [NM_022522]                                                                                            | 20,835 |
| RGD735029 | Rattus norvegicus SEL1 domain containing protein RGD735029 (RGD735029), nuclear gene encoding mitochondrial protein, mRNA [NM_199493]            | 20,830 |
| Mkl1      | PREDICTED: Rattus norvegicus megakaryoblastic leukemia (translocation) 1 (Mkl1), mRNA [XM_235497]                                                | 20,830 |
| Ids       | Uncharacterized protein [Source:UniProtKB/TrEMBL;Acc:D3ZPY7] [ENSRNOT00000042925]                                                                | 20,830 |
| 0         | PREDICTED: Rattus norvegicus similar to high mobility group protein 17 (LOC688424), mRNA [XM_001066874]                                          | 20,825 |
| Usp21     | Rattus norvegicus ubiquitin specific peptidase 21 (Usp21), mRNA [NM_001127638]                                                                   | 20,804 |
| Cyp2j4    | Rattus norvegicus cytochrome P450, family 2, subfamily j, polypeptide 4 (Cyp2j4), mRNA [NM_023025]                                               | 20,797 |
| Nsf       | Rattus norvegicus N-ethylmaleimide-sensitive factor (Nsf), mRNA [NM_021748]                                                                      | 20,794 |
| Kcna1     | Rattus norvegicus potassium voltage-gated channel, shaker-related subfamily, member 1 (Kcna1), mRNA [NM_173095]                                  | 20,791 |
| Olr1381   | Rattus norvegicus olfactory receptor 1381 (Olr1381), mRNA [NM_001000523]                                                                         | 20,788 |
| Slc9a9    | PREDICTED: Rattus norvegicus similar to solute carrier family 9 (sodium/hydrogen exchanger), isoform 9 (RGD1560736), mRNA [XM_001064905]         | 20,788 |
| Bloc1s3   | PREDICTED: Rattus norvegicus biogenesis of lysosomal organelles complex-1, subunit 3 (Bloc1s3), mRNA [XM_001058094]                              | 20,785 |
| Mid1      | Rattus norvegicus midline 1 (Mid1), mRNA [NM_022927]                                                                                             | 20,785 |
| Cacng8    | Rattus norvegicus calcium channel, voltage-dependent, gamma subunit 8 (Cacng8), mRNA [NM_080696]                                                 | 20,777 |
| Comt      | Rattus norvegicus catechol-O-methyltransferase (Comt), mRNA [NM_012531]                                                                          | 20,774 |
| Pnrc1     | Rattus norvegicus proline-rich nuclear receptor coactivator 1 (Pnrc1), mRNA [NM_173322]                                                          | 20,770 |
| Daam1     | Rattus norvegicus dishevelled associated activator of morphogenesis 1 (Daam1), mRNA [NM_001108030]                                               | 20,767 |
| Cnst      | PREDICTED: Rattus norvegicus similar to 9630058J23Rik protein (RGD1564833), mRNA [XM_573525]                                                     | 20,766 |
| Clptm1    | Rattus norvegicus cleft lip and palate associated transmembrane protein 1 (Clptm1), mRNA [NM_001106232]                                          | 20,765 |
| Nedd4     | Rattus norvegicus neural precursor cell expressed, developmentally down-regulated 4 (Nedd4), mRNA [NM_012986]                                    | 20,765 |
| 0         | NID2_HUMAN (Q14112) Nidogen-2 precursor (NID-2) (Osteonidogen), partial (7%) [TC622511]                                                          | 20,764 |
| Ndufa10   | Rattus norvegicus NADH dehydrogenase (ubiquinone) 1 alpha subcomplex 10 (Ndufa10), nuclear gene encoding mitochondrial protein, mRNA [NM_199495] | 20,763 |
| Gpr132    | Rattus norvegicus G protein-coupled receptor 132 (Gpr132), mRNA [NM_001170595]                                                                   | 20,758 |
| Usp46     | Rattus norvegicus ubiquitin specific peptidase 46 (Usp46), mRNA [NM_001191596]                                                                   | 20,754 |
| Spryd3    | Rattus norvegicus SPRY domain containing 3 (Spryd3), mRNA [NM_001191790]                                                                         | 20,754 |
| 0         | protease, serine, 28 Gene [Source:MGI Symbol;Acc:MGI:2149951] [ENSRNOT00000060388]                                                               | 20,749 |
| Samd9l    | PREDICTED: Rattus norvegicus sterile alpha motif domain containing 9-like (Samd9l), mRNA [XM_001069386]                                          | 20,746 |
| Defb24    | Rattus norvegicus defensin beta 24 (Defb24), mRNA [NM_001037508]                                                                                 | 20,745 |
| Sohlh1    | Rattus norvegicus spermatogenesis and oogenesis specific basic helix-loop-helix 1 (Sohlh1), mRNA [NM_001191852]                                  | 20,744 |
| Hmg20a    | Rattus norvegicus high mobility group 20A (Hmg20a), mRNA [NM_001108150]                                                                          | 20,729 |
| 0         | Unknown                                                                                                                                          | 20,723 |
| Trove2    | Rattus norvegicus TROVE domain family, member 2 (Trove2), mRNA [NM_001107183]                                                                    | 20,722 |

|            |                                                                                                                    |        |
|------------|--------------------------------------------------------------------------------------------------------------------|--------|
| Cacna1g    | Rattus norvegicus calcium channel, voltage-dependent, T type, alpha 1G subunit (Cacna1g), mRNA [NM_031601]         | 20,720 |
| Cisd3      | Rattus norvegicus CDGSH iron sulfur domain 3 (Cisd3), mRNA [NM_001105835]                                          | 20,715 |
| Samd5      | Rattus norvegicus sterile alpha motif domain containing 5 (Samd5), mRNA [NM_001108901]                             | 20,713 |
| Lphn1      | Rattus norvegicus latrophilin 1 (Lphn1), mRNA [NM_022962]                                                          | 20,712 |
| RGD1310423 | Rattus norvegicus similar to hypothetical protein FLJ31737 (RGD1310423), mRNA [NM_001029920]                       | 20,712 |
| 0          | Unknown                                                                                                            | 20,707 |
| Rrm2b      | Rattus norvegicus ribonucleotide reductase M2 B (TP53 inducible) (Rrm2b), mRNA [NM_001130543]                      | 20,705 |
| 0          | Q479S2_DECAR (Q479S2) Histidine kinase internal region precursor, partial (7%) [TC592164]                          | 20,701 |
| 0          | Uncharacterized protein [Source:UniProtKB/TrEMBL;Acc:D3ZDX5] [ENSRNOT00000043345]                                  | 20,701 |
| 0          | Uncharacterized protein [Source:UniProtKB/TrEMBL;Acc:D3Z932] [ENSRNOT00000066351]                                  | 20,698 |
| Ctnnbip1   | Rattus norvegicus catenin, beta-interacting protein 1 (Ctnnbip1), mRNA [NM_001173388]                              | 20,696 |
| Gpr56      | Rattus norvegicus G protein-coupled receptor 56 (Gpr56), mRNA [NM_152242]                                          | 20,691 |
| Slc44a2    | Rattus norvegicus solute carrier family 44, member 2 (Slc44a2), mRNA [NM_001134715]                                | 20,688 |
| LOC685671  | PREDICTED: Rattus norvegicus similar to myocyte enhancer factor 2C (LOC685671), miscRNA [XR_006259]                | 20,675 |
| RGD1565030 | PREDICTED: Rattus norvegicus similar to open reading frame A (RGD1565030), mRNA [XM_574008]                        | 20,673 |
| Dcx        | Rattus norvegicus neuronal migration protein doublecortin mRNA, complete cds. [AF155959]                           | 20,670 |
| Rnf187     | Rattus norvegicus ring finger protein 187 (Rnf187), mRNA [NM_001164264]                                            | 20,669 |
| Ubxn7      | Rattus norvegicus UBX domain protein 7 (Ubxn7), mRNA [NM_001107086]                                                | 20,668 |
| Fbxo21     | Rattus norvegicus F-box protein 21 (Fbxo21), mRNA [NM_001108338]                                                   | 20,665 |
| Folr2      | Rattus norvegicus folate receptor 2 (fetal) (Folr2), mRNA [NM_001106283]                                           | 20,656 |
| RGD1308127 | Rattus norvegicus similar to 2700078E11Rik protein (RGD1308127), mRNA [NM_001014248]                               | 20,653 |
| 0          | Uncharacterized protein [Source:UniProtKB/TrEMBL;Acc:D3ZI48] [ENSRNOT00000063788]                                  | 20,632 |
| Phactr1    | Rattus norvegicus phosphatase and actin regulator 1 (Phactr1), mRNA [NM_214457]                                    | 20,631 |
| Tesk1      | Rattus norvegicus testis-specific kinase 1 (Tesk1), mRNA [NM_031578]                                               | 20,630 |
| 0          | Rattus norvegicus similar to Xlr3a protein (LOC367970), mRNA [XM_346375]                                           | 20,629 |
| Dmwd       | PREDICTED: Rattus norvegicus dystrophia myotonica, WD repeat containing (Dmwd), mRNA [XM_001056337]                | 20,628 |
| 0          | PREDICTED: Rattus norvegicus similar to c114 SLIT-like testicular protein (RGD1561285), mRNA [XM_220927]           | 20,623 |
| 0          | myeloid/lymphoid or mixed-lineage leukemia 3 Gene [Source:MGI Symbol;Acc:MGI:2444959] [ENSRNOT00000010349]         | 20,621 |
| Vasp       | Rattus norvegicus vasodilator-stimulated phosphoprotein (Vasp), mRNA [NM_001108475]                                | 20,620 |
| RGD1565693 | PREDICTED: Rattus norvegicus similar to GLE1-like, RNA export mediator isoform 1 (RGD1565693), mRNA [XM_001059991] | 20,616 |
| Prss27     | Rattus norvegicus protease, serine 27 (Prss27), mRNA [NM_182949]                                                   | 20,616 |
| C1ql3      | Rattus norvegicus complement component 1, q subcomponent-like 3 (C1ql3), mRNA [NM_001109403]                       | 20,614 |
| Tnfaip1    | Rattus norvegicus tumor necrosis factor, alpha-induced protein 1 (endothelial) (Tnfaip1), mRNA [NM_182950]         | 20,610 |
| Snph       | Rattus norvegicus syntaphilin (Snph), mRNA [NM_001106525]                                                          | 20,605 |

|              |                                                                                                                                    |        |
|--------------|------------------------------------------------------------------------------------------------------------------------------------|--------|
| Dr1          | Rattus norvegicus down-regulator of transcription 1 (Dr1), mRNA [NM_001011914]                                                     | 20,598 |
| MGC93975     | Rattus norvegicus similar to 2310044H10Rik protein (MGC93975), mRNA [NM_001004221]                                                 | 20,598 |
| Fjx1         | Rattus norvegicus four jointed box 1 (Drosophila) (Fjx1), mRNA [NM_001108955]                                                      | 20,595 |
| LOC498368    | Rattus norvegicus similar to RIKEN cDNA 0610040J01 (LOC498368), mRNA [NM_001017500]                                                | 20,594 |
| RGD1310444   | PREDICTED: Rattus norvegicus LOC363015 (RGD1310444), mRNA [XM_002729871]                                                           | 20,587 |
| RGD1566078   | Uncharacterized protein [Source:UniProtKB/TrEMBL;Acc:D3ZWM0] [ENSRNOT00000013187]                                                  | 20,585 |
| Klf16        | Rattus norvegicus Kruppel-like factor 16 (Klf16), mRNA [NM_001127604]                                                              | 20,583 |
| Clock        | Rattus norvegicus clock homolog (mouse) (Clock), mRNA [NM_021856]                                                                  | 20,578 |
| 0            | Unknown                                                                                                                            | 20,577 |
| Synj2        | Rattus norvegicus synaptojanin 2 (Synj2), transcript variant 3, mRNA [NM_032071]                                                   | 20,574 |
| Fitm2        | Rattus norvegicus fat storage-inducing transmembrane protein 2 (Fitm2), mRNA [NM_001107799]                                        | 20,570 |
| Zscan10      | Rattus norvegicus zinc finger and SCAN domain containing 10 (Zscan10), mRNA [NM_001106981]                                         | 20,561 |
| Snrpn        | Rattus norvegicus small nuclear ribonucleoprotein polypeptide N (Snrpn), mRNA [NM_031117]                                          | 20,560 |
| Dfnb31       | Rattus norvegicus deafness, autosomal recessive 31 (Dfnb31), mRNA [NM_181088]                                                      | 20,558 |
| Baz2a        | Rattus norvegicus bromodomain adjacent to zinc finger domain, 2A (Baz2a), mRNA [NM_001107158]                                      | 20,557 |
| Dcaf5        | Rattus norvegicus DDB1 and CUL4 associated factor 5 (Dcaf5), nuclear gene encoding mitochondrial protein, mRNA [NM_001100718]      | 20,554 |
| Man1b1       | Endoplasmic reticulum mannosyl-oligosaccharide 1,2-alpha-mannosidase [Source:UniProtKB/Swiss-Prot;Acc:B2GUY0] [ENSRNOT00000016846] | 20,550 |
| 0            | Unknown                                                                                                                            | 20,549 |
| Arntl2       | Rattus norvegicus aryl hydrocarbon receptor nuclear translocator-like 2 (Arntl2), mRNA [NM_133391]                                 | 20,548 |
| 0            | Uncharacterized protein [Source:UniProtKB/TrEMBL;Acc:D3ZBI5] [ENSRNOT00000049803]                                                  | 20,548 |
| Gprin1       | Uncharacterized protein [Source:UniProtKB/TrEMBL;Acc:D3ZEG5] [ENSRNOT00000024258]                                                  | 20,547 |
| 0            | Cell division control protein 42 homolog [Source:UniProtKB/Swiss-Prot;Acc:Q8CFN2] [ENSRNOT00000018118]                             | 20,540 |
| Ipo7         | Rattus norvegicus importin 7 (Ipo7), mRNA [NM_001107545]                                                                           | 20,537 |
| Clcn6        | Rattus norvegicus chloride channel 6 (Clcn6), mRNA [NM_001106479]                                                                  | 20,530 |
| Cbx5         | Rattus norvegicus chromobox homolog 5 (HP1 alpha homolog, Drosophila) (Cbx5), mRNA [NM_001106797]                                  | 20,530 |
| 0            | Unknown                                                                                                                            | 20,529 |
| Cpsf6        | Rattus norvegicus cleavage and polyadenylation specific factor 6 (Cpsf6), mRNA [NM_001106785]                                      | 20,527 |
| Trim26       | Rattus norvegicus tripartite motif-containing 26 (Trim26), mRNA [NM_001011665]                                                     | 20,524 |
| 0            | Unknown                                                                                                                            | 20,523 |
| 0            | Unknown                                                                                                                            | 20,514 |
| LOC100363283 | PREDICTED: Rattus norvegicus UBX domain protein 2A (LOC100363283), mRNA [XM_002729616]                                             | 20,509 |
| Tsga14       | Rattus norvegicus testis specific, 14 (Tsga14), mRNA [NM_001025770]                                                                | 20,508 |
| 0            | AMGNNUC:NRHY5-00189-A7-A W Rat hypothalamus (10471) Rattus norvegicus cDNA clone nrhy5-00189-a7 5', mRNA sequence [CB580197]       | 20,501 |
| LOC686412    | PREDICTED: Rattus norvegicus similar to sal-like 4 isoform a (LOC686412), mRNA [XM_001074001]                                      | 20,501 |

|           |                                                                                                                                         |               |
|-----------|-----------------------------------------------------------------------------------------------------------------------------------------|---------------|
| Mmp17     | Rattus norvegicus matrix metallopeptidase 17 (Mmp17), mRNA [NM_001105925]                                                               | <b>20,497</b> |
| Bcl7b     | Rattus norvegicus B-cell CLL/lymphoma 7B (Bcl7b), mRNA [NM_001109021]                                                                   | <b>20,493</b> |
| Pid1      | Rattus norvegicus phosphotyrosine interaction domain containing 1 (Pid1), mRNA [NM_001110493]                                           | <b>20,492</b> |
| Adipor1   | Rattus norvegicus adiponectin receptor 1 (Adipor1), mRNA [NM_207587]                                                                    | <b>20,491</b> |
| Fam48a    | Rattus norvegicus family with sequence similarity 48, member A (Fam48a), mRNA [NM_001014170]                                            | <b>20,489</b> |
| 0         | Unknown                                                                                                                                 | <b>20,484</b> |
| LOC500420 | LOC500420 protein [Source:UniProtKB/TrEMBL;Acc:Q3SWT2] [ENSRNOT00000030559]                                                             | <b>20,483</b> |
| Med11     | Rattus norvegicus mediator complex subunit 11 (Med11), mRNA [NM_001105799]                                                              | <b>20,472</b> |
| Mboat4    | Rattus norvegicus membrane bound O-acyltransferase domain containing 4 (Mboat4), mRNA [NM_001107317]                                    | <b>20,470</b> |
| Camta1    | Rattus norvegicus similar to KIAA0833 protein (Camta1), transcript variant 1, mRNA [NM_001195559]                                       | <b>20,459</b> |
| Rasgef1c  | Rattus norvegicus RasGEF domain family, member 1C (Rasgef1c), mRNA [NM_001108273]                                                       | <b>20,453</b> |
| Shisa4    | Rattus norvegicus shisa homolog 4 (Xenopus laevis) (Shisa4), mRNA [NM_001077826]                                                        | <b>20,452</b> |
| 0         | Unknown                                                                                                                                 | <b>20,448</b> |
| 0         | Unknown                                                                                                                                 | <b>20,445</b> |
| 0         | Uncharacterized protein [Source:UniProtKB/TrEMBL;Acc:D4A428] [ENSRNOT00000040254]                                                       | <b>20,444</b> |
| Tgoln1    | Rattus norvegicus trans-golgi network protein (Tgoln1), mRNA [NM_138840]                                                                | <b>20,442</b> |
| Cbx6      | Rattus norvegicus chromobox homolog 6 (Cbx6), mRNA [NM_001012119]                                                                       | <b>20,433</b> |
| Mrps10    | Rattus norvegicus mitochondrial ribosomal protein S10 (Mrps10), nuclear gene encoding mitochondrial protein, mRNA [NM_001008859]        | <b>20,429</b> |
| Limd2     | Rattus norvegicus LIM domain containing 2 (Limd2), mRNA [NM_001025715]                                                                  | <b>20,429</b> |
| Cox16     | Rattus norvegicus COX16 cytochrome c oxidase assembly homolog (Cox16), nuclear gene encoding mitochondrial protein, mRNA [NM_001163153] | <b>20,428</b> |
| Olr233    | Rattus norvegicus olfactory receptor 233 (Olr233), mRNA [NM_001000207]                                                                  | <b>20,427</b> |
| Mapk4     | Mitogen-activated protein kinase 4 [Source:UniProtKB/Swiss-Prot;Acc:Q63454] [ENSRNOT00000047271]                                        | <b>20,425</b> |
| Mlst8     | Rattus norvegicus MTOR associated protein, LST8 homolog (S. cerevisiae) (Mlst8), mRNA [NM_022404]                                       | <b>20,419</b> |
| Zbtb24    | Rattus norvegicus zinc finger and BTB domain containing 24 (Zbtb24), mRNA [NM_001098667]                                                | <b>20,417</b> |
| Znrf2     | Rattus norvegicus zinc and ring finger 2 (Znrf2), mRNA [NM_001108628]                                                                   | <b>20,412</b> |
| H1fx      | Uncharacterized protein [Source:UniProtKB/TrEMBL;Acc:D3ZIX4] [ENSRNOT00000033687]                                                       | <b>20,410</b> |
| 0         | Unknown                                                                                                                                 | <b>20,404</b> |
| Fam186b   | Rattus norvegicus family with sequence similarity 186, member B (Fam186b), mRNA [NM_001134633]                                          | <b>20,403</b> |
| Olfm2     | Rattus norvegicus olfactomedin 2 (Olfm2), mRNA [NM_001015017]                                                                           | <b>20,402</b> |
| Fkbp8     | Rattus norvegicus FK506 binding protein 8 (Fkbp8), mRNA [NM_001037180]                                                                  | <b>20,400</b> |
| Crlf2     | Rattus norvegicus cytokine receptor-like factor 2 (Crlf2), mRNA [NM_134465]                                                             | <b>20,392</b> |
| Clvs1     | Rattus norvegicus clavesin 1 (Clvs1), mRNA [NM_001108969]                                                                               | <b>20,391</b> |
| Agap1     | Rattus norvegicus ArfGAP with GTPase domain, ankyrin repeat and PH domain 1 (Agap1), mRNA [NM_001108230]                                | <b>20,388</b> |

|            |                                                                                                                                       |        |
|------------|---------------------------------------------------------------------------------------------------------------------------------------|--------|
| Sbno1      | Rattus norvegicus strawberry notch homolog 1 (Drosophila) (Sbno1), mRNA [NM_001107138]                                                | 20,383 |
| Dcx        | Rattus norvegicus doublecortin (Dcx), mRNA [NM_053379]                                                                                | 20,380 |
| Pcdhga2    | Rattus norvegicus protocadherin gamma subfamily A, 2 (Pcdhga2), mRNA [NM_001037139]                                                   | 20,375 |
| Ddx41      | Rattus norvegicus DEAD (Asp-Glu-Ala-Asp) box polypeptide 41 (Ddx41), mRNA [NM_001108046]                                              | 20,372 |
| Lsm6       | Rattus norvegicus LSM6 homolog, U6 small nuclear RNA associated (S. cerevisiae) (Lsm6), mRNA [NM_001126085]                           | 20,368 |
| Lphn2      | Rattus norvegicus latrophilin 2 (Lphn2), transcript variant 2, mRNA [NM_001190475]                                                    | 20,367 |
| RGD1304952 | Rattus norvegicus similar to RIKEN cDNA C530028O21 gene (RGD1304952), mRNA [NM_001014059]                                             | 20,366 |
| Mapkapk2   | Rattus norvegicus mitogen-activated protein kinase-activated protein kinase 2 (Mapkapk2), mRNA [NM_178102]                            | 20,362 |
| Negr1      | Rattus norvegicus neuronal growth regulator 1 (Negr1), mRNA [NM_021682]                                                               | 20,355 |
| Pcolce     | Rattus norvegicus procollagen C-endopeptidase enhancer (Pcolce), mRNA [NM_019237]                                                     | 20,353 |
| Srpk2      | Rattus norvegicus SFRS protein kinase 2 (Srpk2), mRNA [NM_001106575]                                                                  | 20,351 |
| Phf2       | Rattus norvegicus PHD finger protein 2 (Phf2), mRNA [NM_001107342]                                                                    | 20,349 |
| Lrrc8b     | leucine rich repeat containing 8 family, member B [Source:RefSeq peptide;Acc:NP_001100674] [ENSRNOT00000002897]                       | 20,348 |
| Tbx3       | Rattus norvegicus T-box 3 (Tbx3), mRNA [NM_181638]                                                                                    | 20,344 |
| Ankrd40    | Rattus norvegicus ankyrin repeat domain 40 (Ankrd40), mRNA [NM_001134699]                                                             | 20,343 |
| Cnpy3      | Rattus norvegicus canopy 3 homolog (zebrafish) (Cnpy3), mRNA [NM_001134710]                                                           | 20,341 |
| Trim37     | Rattus norvegicus tripartite motif-containing 37 (Trim37), mRNA [NM_001108288]                                                        | 20,338 |
| 0          | Shultzomica03641 Rat lung airway and parenchyma cDNA libraries Rattus norvegicus cDNA clone Contig3221 5', mRNA sequence [CF110390]   | 20,337 |
| Rexo1      | Rattus norvegicus REX1, RNA exonuclease 1 homolog (S. cerevisiae) (Rexo1), mRNA [NM_001012114]                                        | 20,328 |
| Tusc2      | Rattus norvegicus tumor suppressor candidate 2 (Tusc2), mRNA [NM_001109297]                                                           | 20,326 |
| 0          | Unknown                                                                                                                               | 20,316 |
| Zfp318     | PREDICTED: Rattus norvegicus zinc finger protein 318 (Zfp318), mRNA [XM_002727181]                                                    | 20,316 |
| Fgf22      | Rattus norvegicus fibroblast growth factor 22 (Fgf22), mRNA [NM_130751]                                                               | 20,313 |
| Porcn      | Rattus norvegicus porcupine homolog (Drosophila) (Porcn), mRNA [NM_001173355]                                                         | 20,313 |
| Tmem42     | Rattus norvegicus transmembrane protein 42 (Tmem42), mRNA [NM_001191886]                                                              | 20,303 |
| Pde4b      | Rattus norvegicus phosphodiesterase 4B, cAMP specific (Pde4b), mRNA [NM_017031]                                                       | 20,295 |
| Pttg1ip    | Rattus norvegicus pituitary tumor-transforming 1 interacting protein (Pttg1ip), mRNA [NM_001013238]                                   | 20,294 |
| Mmp16      | Rattus norvegicus matrix metalloproteinase 16 (Mmp16), mRNA [NM_080776]                                                               | 20,292 |
| Fam108c1   | Rattus norvegicus family with sequence similarity 108, member C1 (Fam108c1), mRNA [NM_001100736]                                      | 20,285 |
| Zfp346     | Rattus norvegicus zinc finger protein 346 (Zfp346), mRNA [NM_001107338]                                                               | 20,281 |
| RGD1309540 | Rattus norvegicus similar to hypothetical protein MGC40841; similar to hypothetical protein MGC4707 (RGD1309540), mRNA [NM_001013918] | 20,274 |
| Nalcn      | Rattus norvegicus sodium leak channel, non-selective (Nalcn), mRNA [NM_153630]                                                        | 20,273 |
| 0          | Rattus norvegicus similar to RIKEN cDNA 1700001F09 (LOC316932), mRNA [XM_229506]                                                      | 20,269 |
| RGD1564177 | PREDICTED: Rattus norvegicus RGD1564177 (RGD1564177), mRNA [XM_001054841]                                                             | 20,267 |

|            |                                                                                                                        |        |
|------------|------------------------------------------------------------------------------------------------------------------------|--------|
| Rnf152     | Rattus norvegicus ring finger protein 152 (Rnf152), mRNA [NM_001106305]                                                | 20,264 |
| Zfyve20    | Rattus norvegicus zinc finger, FYVE domain containing 20 (Zfyve20), mRNA [NM_001107875]                                | 20,263 |
| Gtf2h3     | Rattus norvegicus general transcription factor IIH, polypeptide 3 (Gtf2h3), mRNA [NM_001024236]                        | 20,262 |
| 0          | PREDICTED: Rattus norvegicus similar to dachshund b (LOC680770), mRNA [XM_001058786]                                   | 20,252 |
| Kcnq2      | Rattus norvegicus potassium voltage-gated channel, KQT-like subfamily, member 2 (Kcnq2), mRNA [NM_133322]              | 20,251 |
| Cyp4a8     | Rattus norvegicus cytochrome P450, family 4, subfamily a, polypeptide 8 (Cyp4a8), mRNA [NM_031605]                     | 20,251 |
| Kcnq2      | Rattus norvegicus potassium voltage-gated channel, KQT-like subfamily, member 2 (Kcnq2), mRNA [NM_133322]              | 20,248 |
| 0          | Unknown                                                                                                                | 20,247 |
| RGD1563070 | Rattus norvegicus similar to hypothetical protein (RGD1563070), mRNA [NM_001134541]                                    | 20,238 |
| Neurl      | Rattus norvegicus neuralized homolog (Drosophila) (Neurl), mRNA [NM_001107605]                                         | 20,238 |
| Kcng2      | Rattus norvegicus potassium voltage-gated channel, subfamily G, member 2 (Kcng2), mRNA [NM_001107372]                  | 20,236 |
| lck        | Rattus norvegicus intestinal cell kinase (lck), mRNA [NM_138886]                                                       | 20,236 |
| Igsf8      | Rattus norvegicus immunoglobulin superfamily, member 8 (Igsf8), mRNA [NM_001014787]                                    | 20,233 |
| Atl1       | Rattus norvegicus atlastin GTPase 1 (Atl1), mRNA [NM_001009831]                                                        | 20,231 |
| RGD1310444 | RCG31867Uncharacterized protein [Source:UniProtKB/TrEMBL;Acc:D3ZIP8] [ENSRNOT00000033969]                              | 20,223 |
| Efcab4a    | Rattus norvegicus EF-hand calcium binding domain 4A (Efcab4a), mRNA [NM_001127541]                                     | 20,218 |
| Mxra8      | Rattus norvegicus matrix-remodelling associated 8 (Mxra8), mRNA [NM_001007002]                                         | 20,212 |
| Tcf3       | Rattus norvegicus transcription factor 3 (Tcf3), mRNA [NM_001107865]                                                   | 20,212 |
| Gpr83      | Rattus norvegicus G protein-coupled receptor 83 (Gpr83), mRNA [NM_080411]                                              | 20,205 |
| Lhx9       | Rattus norvegicus LIM homeobox 9 (Lhx9), mRNA [NM_181367]                                                              | 20,205 |
| 0          | Unknown                                                                                                                | 20,205 |
| Trps1      | Rattus norvegicus trichorhinophalangeal syndrome I homolog (human) (Trps1), mRNA [NM_001134837]                        | 20,198 |
| Ppm1d      | Rattus norvegicus protein phosphatase 1D magnesium-dependent, delta isoform (Ppm1d), mRNA [NM_001105825]               | 20,197 |
| Smtnl1     | Rattus norvegicus smoothelin-like 1 (Smtnl1), mRNA [NM_001191739]                                                      | 20,195 |
| Satb1      | Rattus norvegicus SATB homeobox 1 (Satb1), mRNA [NM_001012129]                                                         | 20,193 |
| Snx24      | Rattus norvegicus sorting nexin 24 (Snx24), mRNA [NM_001008364]                                                        | 20,189 |
| Kif21b     | Rattus norvegicus kinesin family member 21B (Kif21b), mRNA [NM_001105990]                                              | 20,187 |
| Tcf7       | PREDICTED: Rattus norvegicus transcription factor 7, T-cell specific, transcript variant 1 (Tcf7), mRNA [XM_001073458] | 20,186 |
| Brsk1      | Rattus norvegicus BR serine/threonine kinase 1 (Brsk1), mRNA [NM_001127337]                                            | 20,184 |
| Sgk1       | Rattus norvegicus serum/glucocorticoid regulated kinase 1 (Sgk1), transcript variant 3, mRNA [NM_019232]               | 20,181 |
| Dhdds      | Rattus norvegicus dehydrololichyl diphosphate synthase (Dhdds), mRNA [NM_001011978]                                    | 20,180 |
| Pard3      | Rattus norvegicus par-3 (partitioning defective 3) homolog (C. elegans) (Pard3), mRNA [NM_031235]                      | 20,179 |
| 0          | Unknown                                                                                                                | 20,173 |
| Bat2       | Rattus norvegicus HLA-B associated transcript 2 (Bat2), mRNA [NM_212462]                                               | 20,173 |

|            |                                                                                                                                         |        |
|------------|-----------------------------------------------------------------------------------------------------------------------------------------|--------|
| Mal2       | Rattus norvegicus mal, T-cell differentiation protein 2 (Mal2), mRNA [NM_198786]                                                        | 20,166 |
| Spock1     | PREDICTED: Rattus norvegicus sparc/osteonectin, cwcv and kazal-like domains proteoglycan (testican) 1 (Spock1), mRNA [XM_001067546]     | 20,164 |
| Tulp1      | Rattus norvegicus tubby like protein 1 (Tulp1), mRNA [NM_001107642]                                                                     | 20,162 |
| Supt6h     | Rattus norvegicus suppressor of Ty 6 homolog (S. cerevisiae) (Supt6h), mRNA [NM_001191820]                                              | 20,159 |
| Tns3       | Uncharacterized protein [Source:UniProtKB/TrEMBL;Acc:D3ZCL6] [ENSRNOT00000012661]                                                       | 20,151 |
| Nid1       | Nidogen-1 [Source:UniProtKB/Swiss-Prot;Acc:P08460] [ENSRNOT00000003349]                                                                 | 20,150 |
| Plat       | Rattus norvegicus plasminogen activator, tissue (Plat), mRNA [NM_013151]                                                                | 20,146 |
| 0          | Unknown                                                                                                                                 | 20,138 |
| RGD1305793 | Rattus norvegicus similar to hypothetical protein FLJ20154 (RGD1305793), mRNA [NM_001127484]                                            | 20,138 |
| LOC687861  | PREDICTED: Rattus norvegicus similar to methylmalonic aciduria (cobalamin deficiency) type B homolog (LOC687861), mRNA [XM_001080395]   | 20,125 |
| Olr868     | Rattus norvegicus olfactory receptor 868 (Olr868), mRNA [NM_001000821]                                                                  | 20,116 |
| Tmem98     | Rattus norvegicus transmembrane protein 98 (Tmem98), mRNA [NM_001007672]                                                                | 20,114 |
| Ssr1       | Rattus norvegicus signal sequence receptor, alpha (Ssr1), mRNA [NM_001008891]                                                           | 20,108 |
| Srgap1     | Rattus norvegicus SLIT-ROBO Rho GTPase activating protein 1 (Srgap1), mRNA [NM_001191784]                                               | 20,096 |
| Rps6ka2    | Rattus norvegicus ribosomal protein S6 kinase polypeptide 2 (Rps6ka2), mRNA [NM_057128]                                                 | 20,091 |
| Zbtb6      | Rattus norvegicus zinc finger and BTB domain containing 6 (Zbtb6), mRNA [NM_001108953]                                                  | 20,090 |
| Ubt2       | PREDICTED: Rattus norvegicus ubiquitin domain containing 2 (Ubt2), mRNA [XM_213249]                                                     | 20,086 |
| LOC302495  | Rattus norvegicus hypothetical LOC302495 (LOC302495), mRNA [NM_001106950]                                                               | 20,063 |
| Tmtc3      | Rattus norvegicus transmembrane and tetratricopeptide repeat containing 3 (Tmtc3), mRNA [NM_001135858]                                  | 20,053 |
| Nmnat1     | Rattus norvegicus nicotinamide nucleotide adenylyltransferase 1 (Nmnat1), mRNA [NM_001037556]                                           | 20,048 |
| Amica1     | Uncharacterized protein [Source:UniProtKB/TrEMBL;Acc:D4A1C2] [ENSRNOT00000007588]                                                       | 20,048 |
| 0          | Q4RCF0_TETNG (Q4RCF0) Chromosome undetermined SCAF19066, whole genome shotgun sequence. (Fragment), partial (8%) [TC624062]             | 20,047 |
| Col4a3bp   | Rattus norvegicus collagen, type IV, alpha 3 (Goodpasture antigen) binding protein (Col4a3bp), mRNA [NM_001108935]                      | 20,045 |
| 0          | S18L2_MOUSE (Q9D174) SS18-like protein 2, complete [TC585393]                                                                           | 20,044 |
| Pdlim7     | Rattus norvegicus PDZ and LIM domain 7 (Pdlim7), mRNA [NM_173125]                                                                       | 20,037 |
| Slc35a3    | Rattus norvegicus solute carrier family 35 (UDP-N-acetylglucosamine (UDP-GlcNAc) transporter), member A3 (Slc35a3), mRNA [NM_001012082] | 20,034 |
| Traf4af1   | Rattus norvegicus TRAF4 associated factor 1 (Traf4af1), mRNA [NM_001004264]                                                             | 20,029 |
| Zhx1       | Rattus norvegicus zinc fingers and homeoboxes 1 (Zhx1), mRNA [NM_133620]                                                                | 20,029 |
| Slc12a8    | Rattus norvegicus solute carrier family 12 (potassium/chloride transporters), member 8 (Slc12a8), mRNA [NM_153625]                      | 20,026 |
| 0          | Nope protein [Source:UniProtKB/TrEMBL;Acc:B5DFA9] [ENSRNOT00000044706]                                                                  | 20,024 |
| 0          | Unknown                                                                                                                                 | 20,023 |
| Zfp280b    | Rattus norvegicus zinc finger protein 280b (Zfp280b), mRNA [NM_001106384]                                                               | 20,022 |
| Cacng2     | Rattus norvegicus calcium channel, voltage-dependent, gamma subunit 2 (Cacng2), mRNA [NM_053351]                                        | 20,021 |
| 0          | Unknown                                                                                                                                 | 20,018 |



|            |                                                                                                                                                   |        |
|------------|---------------------------------------------------------------------------------------------------------------------------------------------------|--------|
| Pskh1      | Rattus norvegicus protein serine kinase H1 (Pskh1), mRNA [NM_001108897]                                                                           | 20,016 |
| RGD1309594 | Rattus norvegicus similar to RIKEN cDNA 1810043G02; DNA segment, Chr 10, Johns Hopkins University 13, expressed (RGD1309594), mRNA [NM_001008351] | 20,016 |
| Efna2      | Rattus norvegicus ephrin A2 (Efna2), mRNA [NM_001168670]                                                                                          | 20,007 |
| Frzb       | Rattus norvegicus frizzled-related protein (Frzb), mRNA [NM_001100527]                                                                            | 20,006 |
| Pip4k2c    | Rattus norvegicus phosphatidylinositol-5-phosphate 4-kinase, type II, gamma (Pip4k2c), mRNA [NM_080480]                                           | 20,000 |
| Lamc1      | Rattus norvegicus laminin, gamma 1 (Lamc1), mRNA [NM_053966]                                                                                      | 19,998 |
| Ankrd39    | Rattus norvegicus ankyrin repeat domain 39 (Ankrd39), mRNA [NM_001135014]                                                                         | 19,997 |
| Kcnj3      | Rattus norvegicus potassium inwardly-rectifying channel, subfamily J, member 3 (Kcnj3), mRNA [NM_031610]                                          | 19,997 |
| 0          | Unknown                                                                                                                                           | 19,990 |
| 0          | BC076587 Apbb2 protein {Mus musculus} (exp=-1; wgp=0; cg=0), partial (4%) [TC625977]                                                              | 19,989 |
| Ankrd40    | Rattus norvegicus ankyrin repeat domain 40 (Ankrd40), mRNA [NM_001134699]                                                                         | 19,985 |
| Spire1     | Rattus norvegicus spire homolog 1 (Drosophila) (Spire1), mRNA [NM_001107381]                                                                      | 19,981 |
| Syt9       | Rattus norvegicus synaptotagmin IX (Syt9), mRNA [NM_053324]                                                                                       | 19,980 |
| RGD1563701 | PREDICTED: Rattus norvegicus similar to BC068281 protein (RGD1563701), mRNA [XM_001070724]                                                        | 19,975 |
| Fgf13      | Rattus norvegicus fibroblast growth factor 13 (Fgf13), mRNA [NM_053428]                                                                           | 19,971 |
| Ero1l      | Rattus norvegicus ERO1-like (S. cerevisiae) (Ero1l), mRNA [NM_138528]                                                                             | 19,970 |
| 0          | Unknown                                                                                                                                           | 19,963 |
| Usp31      | Rattus norvegicus ubiquitin specific peptidase 31 (Usp31), mRNA [NM_001107548]                                                                    | 19,961 |
| Sec31a     | Rattus norvegicus SEC31 homolog A (S. cerevisiae) (Sec31a), mRNA [NM_033021]                                                                      | 19,961 |
| 0          | Q5MPV8_PREEN (Q5MPV8) Thap11 (Fragment), partial (52%) [TC586886]                                                                                 | 19,956 |
| Osr2       | Rattus norvegicus odd-skipped related 2 (Drosophila) (Osr2), mRNA [NM_001012118]                                                                  | 19,955 |
| Nhlh2      | Rattus norvegicus nescient helix loop helix 2 (Nhlh2), mRNA [NM_001106457]                                                                        | 19,951 |
| 0          | Unknown                                                                                                                                           | 19,949 |
| Rnft2      | Rattus norvegicus ring finger protein, transmembrane 2 (Rnft2), mRNA [NM_001107144]                                                               | 19,945 |
| Mlph       | Rattus norvegicus melanophilin (Mlph), mRNA [NM_001012135]                                                                                        | 19,945 |
| 0          | Uncharacterized protein [Source:UniProtKB/TrEMBL;Acc:D3ZPT5] [ENSRNOT00000067382]                                                                 | 19,943 |
| RGD1564755 | Rattus norvegicus similar to putative pheromone receptor (Go-VN5) (RGD1564755), mRNA [NM_001099465]                                               | 19,939 |
| Cetn4      | Unknown                                                                                                                                           | 19,936 |
| Zhx3       | Rattus norvegicus zinc fingers and homeoboxes 3 (Zhx3), mRNA [NM_001047097]                                                                       | 19,935 |
| Olr875     | Rattus norvegicus olfactory receptor 875 (Olr875), mRNA [NM_001000054]                                                                            | 19,932 |
| 0          | Unknown                                                                                                                                           | 19,927 |
| Zcchc8     | Rattus norvegicus zinc finger, CCHC domain containing 8 (Zcchc8), mRNA [NM_001105929]                                                             | 19,923 |
| Ranbp1     | Rattus norvegicus RAN binding protein 1 (Ranbp1), mRNA [NM_001108324]                                                                             | 19,922 |

|            |                                                                                                                                                                       |        |
|------------|-----------------------------------------------------------------------------------------------------------------------------------------------------------------------|--------|
| Ecop       | Rattus norvegicus EGFR-coamplified and overexpressed protein (Ecop), mRNA [NM_001108630]                                                                              | 19,921 |
| Rps6ka1    | Rattus norvegicus ribosomal protein S6 kinase polypeptide 1 (Rps6ka1), mRNA [NM_031107]                                                                               | 19,919 |
| 0          | Unknown                                                                                                                                                               | 19,916 |
| Socs2      | Rattus norvegicus suppressor of cytokine signaling 2 (Socs2), mRNA [NM_058208]                                                                                        | 19,903 |
| Tbc1d7     | Rattus norvegicus TBC1 domain family, member 7 (Tbc1d7), mRNA [NM_001108411]                                                                                          | 19,899 |
| Ypel4      | Rattus norvegicus yippee-like 4 (Drosophila) (Ypel4), mRNA [NM_001024369]                                                                                             | 19,897 |
| Ifi30      | Rattus norvegicus interferon gamma inducible protein 30 (Ifi30), mRNA [NM_001030026]                                                                                  | 19,892 |
| Tox3       | Rattus norvegicus TOX high mobility group box family member 3 (Tox3), mRNA [NM_001106171]                                                                             | 19,888 |
| 0          | Unknown                                                                                                                                                               | 19,885 |
| Vgf        | Rattus norvegicus VGF nerve growth factor inducible (Vgf), mRNA [NM_030997]                                                                                           | 19,880 |
| 0          | Rattus norvegicus TL0AEA5YN17 mRNA sequence. [FQ233918]                                                                                                               | 19,877 |
| Satb2      | Rattus norvegicus SATB homeobox 2 (Satb2), mRNA [NM_001109306]                                                                                                        | 19,870 |
| Scamp2     | Rattus norvegicus secretory carrier membrane protein 2 (Scamp2), mRNA [NM_023955]                                                                                     | 19,865 |
| Ogfr1      | Rattus norvegicus opioid growth factor receptor-like 1 (Ogfr1), mRNA [NM_001025708]                                                                                   | 19,862 |
| Pak7       | Rattus norvegicus p21 protein (Cdc42/Rac)-activated kinase 7 (Pak7), mRNA [NM_001107781]                                                                              | 19,840 |
| 0          | RVL8568 Wackym-Soares normalized rat vestibular cDNA library Rattus norvegicus cDNA 5', mRNA sequence [DV717996]                                                      | 19,837 |
| Slc25a22   | Rattus norvegicus solute carrier family 25 (mitochondrial carrier, glutamate), member 22 (Slc25a22), nuclear gene encoding mitochondrial protein, mRNA [NM_001014027] | 19,837 |
| Sstr2      | Rattus norvegicus somatostatin receptor 2 (Sstr2), mRNA [NM_019348]                                                                                                   | 19,833 |
| Cdc2l6     | Rattus norvegicus cell division cycle 2-like 6 (CDK8-like) (Cdc2l6), mRNA [NM_001107634]                                                                              | 19,833 |
| Kcnab2     | Rattus norvegicus potassium voltage-gated channel, shaker-related subfamily, beta member 2 (Kcnab2), mRNA [NM_017304]                                                 | 19,832 |
| Rabgap1    | Rattus norvegicus RAB GTPase activating protein 1 (Rabgap1), mRNA [NM_001107841]                                                                                      | 19,828 |
| Nckipsd    | Rattus norvegicus NCK interacting protein with SH3 domain (Nckipsd), mRNA [NM_001106857]                                                                              | 19,826 |
| Nudt15     | Rattus norvegicus nudix (nucleoside diphosphate linked moiety X)-type motif 15 (Nudt15), mRNA [NM_001106049]                                                          | 19,824 |
| 0          | PREDICTED: Rattus norvegicus similar to Protein C9orf126 homolog (LOC690538), mRNA [XM_001074743]                                                                     | 19,822 |
| Pygo2      | Rattus norvegicus pygopus 2 (Pygo2), mRNA [NM_001106447]                                                                                                              | 19,814 |
| Pde1b      | Rattus norvegicus phosphodiesterase 1B, calmodulin-dependent (Pde1b), mRNA [NM_022710]                                                                                | 19,812 |
| Rfx7       | Rattus norvegicus regulatory factor X, 7 (Rfx7), mRNA [NM_001127490]                                                                                                  | 19,808 |
| Tpcn1      | Rattus norvegicus two pore segment channel 1 (Tpcn1), mRNA [NM_139332]                                                                                                | 19,804 |
| Prdm4      | Rattus norvegicus PR domain containing 4 (Prdm4), mRNA [NM_133312]                                                                                                    | 19,802 |
| RGD1308759 | Rattus norvegicus similar to KIAA0892 protein (RGD1308759), mRNA [NM_001106077]                                                                                       | 19,800 |
| RGD735175  | Rattus norvegicus hypothetical protein MGC:72616 (RGD735175), mRNA [NM_199112]                                                                                        | 19,796 |
| Gtf2ird2   | General transcription factor II I repeat domain-containing 2 [Source:UniProtKB/TrEMBL;Acc:Q2V6E6] [ENSRNOT00000002030]                                                | 19,794 |
| Hdac11     | Rattus norvegicus histone deacetylase 11 (Hdac11), mRNA [NM_001106610]                                                                                                | 19,792 |

|            |                                                                                                                                 |        |
|------------|---------------------------------------------------------------------------------------------------------------------------------|--------|
| Tceb3      | Rattus norvegicus transcription elongation factor B (SIII), polypeptide 3 (Tceb3), mRNA [NM_017103]                             | 19,788 |
| Tmem86a    | Rattus norvegicus transmembrane protein 86A (Tmem86a), mRNA [NM_001135016]                                                      | 19,783 |
| Wdtdc1     | Rattus norvegicus WD and tetratricopeptide repeats 1 (Wdtdc1), mRNA [NM_001107908]                                              | 19,774 |
| Elof1      | Rattus norvegicus elongation factor 1 homolog (S. cerevisiae) (Elof1), mRNA [NM_001126098]                                      | 19,768 |
| Cpsf1      | Rattus norvegicus cleavage and polyadenylation specific factor 1 (Cpsf1), mRNA [NM_001130571]                                   | 19,759 |
| 0          | Q6X2J5_9SAUR (Q6X2J5) NADH dehydrogenase subunit 4 (Fragment), partial (6%) [TC646703]                                          | 19,758 |
| Atp7a      | Rattus norvegicus ATPase, Cu <sup>++</sup> transporting, alpha polypeptide (Atp7a), mRNA [NM_052803]                            | 19,758 |
| Ptprf      | Rattus norvegicus protein tyrosine phosphatase, receptor type, F (Ptprf), mRNA [NM_019249]                                      | 19,755 |
| 0          | Unknown                                                                                                                         | 19,755 |
| 0          | Solute carrier family 26, member 8 (Predicted)Uncharacterized protein [Source:UniProtKB/TrEMBL;Acc:D3Z800] [ENSRNOT00000000615] | 19,753 |
| Myo6       | PREDICTED: Rattus norvegicus myosin VI (Myo6), mRNA [XM_236444]                                                                 | 19,752 |
| RGD1310352 | Rattus norvegicus similar to HTGN29 protein; keratinocytes associated transmembrane protein 2 (RGD1310352), mRNA [NM_001106999] | 19,751 |
| LOC498201  | PREDICTED: Rattus norvegicus hypothetical LOC498201 (LOC498201), mRNA [XM_573419]                                               | 19,747 |
| 0          | Unknown                                                                                                                         | 19,741 |
| 0          | methyl-CpG binding domain protein 5 Gene [Source:MGI Symbol;Acc:MGI:2138934] [ENSRNOT000000034632]                              | 19,738 |
| Nipsnap1   | Rattus norvegicus nipsnap homolog 1 (C. elegans) (Nipsnap1), mRNA [NM_001100730]                                                | 19,738 |
| Necap2     | Rattus norvegicus NECAP endocytosis associated 2 (Necap2), mRNA [NM_199096]                                                     | 19,734 |
| LOC681458  | PREDICTED: Rattus norvegicus similar to stearyl-coenzyme A desaturase 3 (LOC681458), mRNA [XM_001056911]                        | 19,731 |
| Pcdhb11    | PREDICTED: Rattus norvegicus protocadherin beta 11 (Pcdhb11), mRNA [XM_001055576]                                               | 19,725 |
| RGD1561065 | Rattus norvegicus similar to mKIAA1111 protein (RGD1561065), mRNA [NM_001108253]                                                | 19,723 |
| 0          | Protein FAM134A [Source:UniProtKB/Swiss-Prot;Acc:Q3MHU5] [ENSRNOT000000025135]                                                  | 19,721 |
| LOC679038  | Rattus norvegicus similar to mammalian retrotransposon derived 8b (LOC679038), mRNA [NM_001100998]                              | 19,720 |
| Cmtm5      | Rattus norvegicus CKLF-like MARVEL transmembrane domain containing 5 (Cmtm5), mRNA [NM_001106034]                               | 19,718 |
| Preli1     | Rattus norvegicus PRELI domain containing 1 (Preli1), mRNA [NM_001009636]                                                       | 19,711 |
| RGD1565648 | PREDICTED: Rattus norvegicus protein S100-A11-like (LOC100362296), mRNA [XM_002729212]                                          | 19,710 |
| Asap1      | Rattus norvegicus ArfGAP with SH3 domain, ankyrin repeat and PH domain 1 (Asap1), mRNA [NM_001044245]                           | 19,705 |
| Tpra1      | Rattus norvegicus transmembrane protein, adipocyte associated 1 (Tpra1), mRNA [NM_053534]                                       | 19,704 |
| 0          | Q2FXP0_STAAU (Q2FXP0) Formamidopyrimidine-DNA glycosylase , partial (6%) [TC596639]                                             | 19,691 |
| Mdga1      | Rattus norvegicus MAM domain containing glycosylphosphatidylinositol anchor 1 (Mdga1), mRNA [NM_001107618]                      | 19,685 |
| Rabif      | Rattus norvegicus RAB interacting factor (Rabif), mRNA [NM_001007678]                                                           | 19,682 |
| Sstr2      | Rattus norvegicus somatostatin receptor 2 (Sstr2), mRNA [NM_019348]                                                             | 19,681 |
| Ano6       | Rattus norvegicus anoctamin 6 (Ano6), mRNA [NM_001108108]                                                                       | 19,680 |
| Prrx1      | Rattus norvegicus paired related homeobox 1 (Prrx1), mRNA [NM_153821]                                                           | 19,679 |
| Rab35      | Rattus norvegicus RAB35, member RAS oncogene family (Rab35), mRNA [NM_001013046]                                                | 19,674 |

|            |                                                                                                                                                                  |        |
|------------|------------------------------------------------------------------------------------------------------------------------------------------------------------------|--------|
| Vom2r71    | Rattus norvegicus vomeronasal 2 receptor, 71 (Vom2r71), mRNA [NM_001099516]                                                                                      | 19,670 |
| 0          | Q7TPN2_MOUSE (Q7TPN2) Ube2o protein, partial (38%) [TC615970]                                                                                                    | 19,669 |
| Crtc3      | PREDICTED: Rattus norvegicus CREB regulated transcription coactivator 3 (Crtc3), mRNA [XM_001066604]                                                             | 19,667 |
| Vom1r78    | Rattus norvegicus vomeronasal 1 receptor 78 (Vom1r78), mRNA [NM_001008924]                                                                                       | 19,666 |
| Olr546     | Rattus norvegicus olfactory receptor 546 (Olr546), mRNA [NM_001001054]                                                                                           | 19,660 |
| Olr232     | Rattus norvegicus olfactory receptor 232 (Olr232), mRNA [NM_001001035]                                                                                           | 19,660 |
| Ak3l1      | Rattus norvegicus adenylate kinase 3-like 1, mRNA (cDNA clone MGC:93541 IMAGE:7107348), complete cds. [BC087024]                                                 | 19,658 |
| Hdac1      | Rattus norvegicus histone deacetylase 1 (Hdac1), mRNA [NM_001025409]                                                                                             | 19,657 |
| Chst7      | Rattus norvegicus carbohydrate (N-acetylglucosamine 6-O) sulfotransferase 7 (Chst7), mRNA [NM_207600]                                                            | 19,654 |
| Ywhah      | Rattus norvegicus tyrosine 3-monooxygenase/tryptophan 5-monooxygenase activation protein, eta polypeptide (Ywhah), mRNA [NM_013052]                              | 19,650 |
| RGD1560108 | Rattus norvegicus similar to RIKEN cDNA 2700081O15 (RGD1560108), mRNA [NM_001109161]                                                                             | 19,646 |
| Nucks1     | Rattus norvegicus nuclear casein kinase and cyclin-dependent kinase substrate 1 (Nucks1), mRNA [NM_022799]                                                       | 19,641 |
| 0          | Unknown                                                                                                                                                          | 19,636 |
| Cln6       | Rattus norvegicus ceroid-lipofuscinosis, neuronal 6 (Cln6), mRNA [NM_001191794]                                                                                  | 19,633 |
| Dmrt3      | Rattus norvegicus doublesex and mab-3 related transcription factor 3 (Dmrt3), mRNA [NM_001106358]                                                                | 19,633 |
| Cox6a2     | Rattus norvegicus cytochrome c oxidase, subunit VIa, polypeptide 2 (Cox6a2), nuclear gene encoding mitochondrial protein, transcript variant 1, mRNA [NM_012812] | 19,631 |
| RGD1565712 | Rattus norvegicus similar to Hypothetical protein MGC59495 (RGD1565712), mRNA [NM_001127579]                                                                     | 19,631 |
| Pfn2       | Rattus norvegicus profilin 2 (Pfn2), mRNA [NM_030873]                                                                                                            | 19,627 |
| Pigb       | Rattus norvegicus phosphatidylinositol glycan anchor biosynthesis, class B (Pigb), mRNA [NM_001108166]                                                           | 19,623 |
| 0          | Unknown                                                                                                                                                          | 19,618 |
| 0          | Unknown                                                                                                                                                          | 19,617 |
| Grb2       | Rattus norvegicus growth factor receptor bound protein 2 (Grb2), mRNA [NM_030846]                                                                                | 19,612 |
| Ids        | PREDICTED: Rattus norvegicus iduronate 2-sulfatase (Ids), mRNA [XM_001054447]                                                                                    | 19,605 |
| Meaf6      | Rattus norvegicus MYST/Esa1-associated factor 6 (Meaf6), mRNA [NM_001113784]                                                                                     | 19,596 |
| Atg5       | Rattus norvegicus ATG5 autophagy related 5 homolog (S. cerevisiae) (Atg5), mRNA [NM_001014250]                                                                   | 19,592 |
| Susd4      | Rattus norvegicus sushi domain containing 4 (Susd4), mRNA [NM_001105982]                                                                                         | 19,591 |
| Ezh1       | Rattus norvegicus enhancer of zeste homolog 1 (Drosophila) (Ezh1), mRNA [NM_001107051]                                                                           | 19,589 |
| RGD1311595 | PREDICTED: Rattus norvegicus similar to KIAA2026 protein (RGD1311595), mRNA [XM_001079649]                                                                       | 19,588 |
| Cap1       | Rattus norvegicus CAP, adenylate cyclase-associated protein 1 (yeast) (Cap1), mRNA [NM_022383]                                                                   | 19,586 |
| Col12a1    | Collagen alpha-1(XII) chain [Source:UniProtKB/Swiss-Prot;Acc:P70560] [ENSRNOT00000043691]                                                                        | 19,583 |
| Ythdc1     | Rattus norvegicus YTH domain containing 1 (Ythdc1), mRNA [NM_133423]                                                                                             | 19,582 |
| Scoc       | Rattus norvegicus short coiled-coil protein (Scoc), mRNA [NM_001013235]                                                                                          | 19,578 |
| 0          | Unknown                                                                                                                                                          | 19,568 |

|            |                                                                                                                                             |               |
|------------|---------------------------------------------------------------------------------------------------------------------------------------------|---------------|
| Gpd2       | Rattus norvegicus glycerol-3-phosphate dehydrogenase 2, mitochondrial (Gpd2), nuclear gene encoding mitochondrial protein, mRNA [NM_012736] | <b>19,565</b> |
| Map1lc3b   | Rattus norvegicus microtubule-associated protein 1 light chain 3 beta (Map1lc3b), mRNA [NM_022867]                                          | <b>19,560</b> |
| Zfp57      | Rattus norvegicus zinc finger protein 57 (Zfp57), mRNA [NM_213565]                                                                          | <b>19,560</b> |
| Fam187b    | Uncharacterized protein [Source:UniProtKB/TrEMBL;Acc:D3ZT17] [ENSRNOT00000028593]                                                           | <b>19,558</b> |
| Jazf1      | Uncharacterized protein [Source:UniProtKB/TrEMBL;Acc:D3ZA80] [ENSRNOT00000039580]                                                           | <b>19,555</b> |
| Ccdc153    | Rattus norvegicus coiled-coil domain containing 153 (Ccdc153), mRNA [NM_001013953]                                                          | <b>19,551</b> |
| Tbc1d9b    | Rattus norvegicus TBC1 domain family, member 9B (Tbc1d9b), mRNA [NM_001108274]                                                              | <b>19,549</b> |
| Ccdc101    | Rattus norvegicus coiled-coil domain containing 101 (Ccdc101), mRNA [NM_001114502]                                                          | <b>19,548</b> |
| Foxred2    | Rattus norvegicus FAD-dependent oxidoreductase domain containing 2 (Foxred2), mRNA [NM_001191787]                                           | <b>19,543</b> |
| Ube2v1     | Rattus norvegicus ubiquitin-conjugating enzyme E2 variant 1 (Ube2v1), mRNA [NM_001110345]                                                   | <b>19,538</b> |
| Erc2       | Rattus norvegicus ELKS/RAB6-interacting/CAST family member 2 (Erc2), mRNA [NM_170787]                                                       | <b>19,533</b> |
| Tspsyl2    | Rattus norvegicus TSPY-like 2 (Tspsyl2), mRNA [NM_001191618]                                                                                | <b>19,532</b> |
| RGD1561149 | Rattus norvegicus similar to mKIAA1522 protein (RGD1561149), mRNA [NM_001134629]                                                            | <b>19,530</b> |
| Lcp1       | Rattus norvegicus lymphocyte cytosolic protein 1 (Lcp1), mRNA [NM_001012044]                                                                | <b>19,524</b> |
| Hist2h3c   | PREDICTED: Rattus norvegicus similar to CG31613-PA (LOC679950), mRNA [XM_001055051]                                                         | <b>19,520</b> |
| LOC686205  | PREDICTED: Rattus norvegicus hypothetical protein LOC686205 (LOC686205), mRNA [XM_001072876]                                                | <b>19,514</b> |
| Picalm     | Rattus norvegicus phosphatidylinositol binding clathrin assembly protein (Picalm), mRNA [NM_053554]                                         | <b>19,513</b> |
| 0          | Uncharacterized protein [Source:UniProtKB/TrEMBL;Acc:D3Z8Y2] [ENSRNOT00000034387]                                                           | <b>19,508</b> |
| Tas2r113   | Rattus norvegicus taste receptor, type 2, member 113 (Tas2r113), mRNA [NM_001166689]                                                        | <b>19,507</b> |
| Slc6a18    | Rattus norvegicus solute carrier family 6, member 18 (Slc6a18), mRNA [NM_017163]                                                            | <b>19,499</b> |
| Pigh       | Rattus norvegicus phosphatidylinositol glycan anchor biosynthesis, class H (Pigh), mRNA [NM_001108714]                                      | <b>19,499</b> |
| Ube2m      | Rattus norvegicus ubiquitin-conjugating enzyme E2M (UBC12 homolog, yeast) (Ube2m), mRNA [NM_001108471]                                      | <b>19,496</b> |
| Atxn1      | Rattus norvegicus ataxin 1 (Atxn1), mRNA [NM_012726]                                                                                        | <b>19,494</b> |
| 0          | Unknown                                                                                                                                     | <b>19,493</b> |
| RGD1308226 | Rattus norvegicus similar to hypothetical protein FLJ32786 (RGD1308226), mRNA [NM_001106589]                                                | <b>19,493</b> |
| 0          | Protein jagged-2 [Source:UniProtKB/Swiss-Prot;Acc:P97607] [ENSRNOT00000019066]                                                              | <b>19,491</b> |
| Pafah1b3   | Rattus norvegicus platelet-activating factor acetylhydrolase, isoform 1b, subunit 3 (Pafah1b3), mRNA [NM_053654]                            | <b>19,490</b> |
| Defb51     | Rattus norvegicus defensin beta 51 (Defb51), mRNA [NM_001037547]                                                                            | <b>19,488</b> |
| 0          | Histone H2A type 2-A [Source:UniProtKB/Swiss-Prot;Acc:P0CC09] [ENSRNOT00000047696]                                                          | <b>19,480</b> |
| Rassf5     | Rattus norvegicus Ras association (RalGDS/AF-6) domain family member 5 (Rassf5), mRNA [NM_019365]                                           | <b>19,479</b> |
| Acd        | Rattus norvegicus adrenocortical dysplasia homolog (mouse) (Acd), mRNA [NM_001037193]                                                       | <b>19,479</b> |
| Ppfia3     | Liprin-alpha-3 [Source:UniProtKB/Swiss-Prot;Acc:Q91Z79] [ENSRNOT00000028142]                                                                | <b>19,478</b> |
| Mtch2      | Rattus norvegicus mitochondrial carrier homolog 2 (C. elegans) (Mtch2), nuclear gene encoding mitochondrial protein, mRNA [NM_001106488]    | <b>19,478</b> |

|              |                                                                                                                                                                                                                          |               |
|--------------|--------------------------------------------------------------------------------------------------------------------------------------------------------------------------------------------------------------------------|---------------|
| Psors1c2     | Rattus norvegicus psoriasis susceptibility 1 candidate 2 (human) (Psors1c2), mRNA [NM_001166016]                                                                                                                         | <b>19,476</b> |
| Ptpn1        | Rattus norvegicus protein tyrosine phosphatase, non-receptor type 1 (Ptpn1), mRNA [NM_012637]                                                                                                                            | <b>19,475</b> |
| Plekhh1      | Rattus norvegicus pleckstrin homology domain containing, family H (with MyTH4 domain) member 1 (Plekhh1), mRNA [NM_001108036]                                                                                            | <b>19,471</b> |
| 0            | Unknown                                                                                                                                                                                                                  | <b>19,469</b> |
| Acox1        | Peroxisomal acyl-coenzyme A oxidase 1Peroxisomal acyl-CoA oxidase 1, A chainPeroxisomal acyl-CoA oxidase 1, B chainPeroxisomal acyl-CoA oxidase 1, C chain [Source:UniProtKB/Swiss-Prot;Acc:P07872] [ENSRNOT00000042372] | <b>19,467</b> |
| Lzts2        | Rattus norvegicus leucine zipper, putative tumor suppressor 2 (Lzts2), mRNA [NM_001014247]                                                                                                                               | <b>19,465</b> |
| Abat         | Rattus norvegicus 4-aminobutyrate aminotransferase (Abat), nuclear gene encoding mitochondrial protein, mRNA [NM_031003]                                                                                                 | <b>19,462</b> |
| 0            | Rattus norvegicus cDNA clone IMAGE:7377987. [BC158826]                                                                                                                                                                   | <b>19,461</b> |
| Tmem59       | Rattus norvegicus transmembrane protein 59 (Tmem59), mRNA [NM_001139465]                                                                                                                                                 | <b>19,460</b> |
| 0            | Unknown                                                                                                                                                                                                                  | <b>19,459</b> |
| Sned1        | Rattus norvegicus isolate No:6 insulin responsive sequence DNA binding protein-1 mRNA, partial cds. [AF439716]                                                                                                           | <b>19,458</b> |
| Defb20       | Rattus norvegicus defensin beta 20 (Defb20), mRNA [NM_001037517]                                                                                                                                                         | <b>19,454</b> |
| Cd164        | Rattus norvegicus CD164 molecule, sialomucin (Cd164), mRNA [NM_031812]                                                                                                                                                   | <b>19,451</b> |
| 0            | Unknown                                                                                                                                                                                                                  | <b>19,451</b> |
| Ammecr1l     | Rattus norvegicus AMME chromosomal region gene 1-like (Ammecr1l), mRNA [NM_001107399]                                                                                                                                    | <b>19,446</b> |
| Tmem188      | Rattus norvegicus transmembrane protein 188 (Tmem188), mRNA [NM_001106173]                                                                                                                                               | <b>19,444</b> |
| 0            | Unknown                                                                                                                                                                                                                  | <b>19,444</b> |
| Arf3         | Rattus norvegicus ADP-ribosylation factor 3 (Arf3), mRNA [NM_080904]                                                                                                                                                     | <b>19,443</b> |
| Ppp2r5c      | Rattus norvegicus protein phosphatase 2, regulatory subunit B', gamma isoform (Ppp2r5c), mRNA [NM_001191112]                                                                                                             | <b>19,439</b> |
| Park7        | Rattus norvegicus Parkinson disease (autosomal recessive, early onset) 7, mRNA (cDNA clone MGC:108615 IMAGE:7376914), complete cds. [BC091128]                                                                           | <b>19,437</b> |
| Pcdhgb2      | Uncharacterized protein [Source:UniProtKB/TrEMBL;Acc:D3ZFX5] [ENSRNOT00000065447]                                                                                                                                        | <b>19,437</b> |
| 0            | Unknown                                                                                                                                                                                                                  | <b>19,429</b> |
| Cuedc1       | Rattus norvegicus CUE domain containing 1 (Cuedc1), mRNA [NM_001013971]                                                                                                                                                  | <b>19,421</b> |
| 0            | Unknown                                                                                                                                                                                                                  | <b>19,419</b> |
| Acap2        | Rattus norvegicus ArfGAP with coiled-coil, ankyrin repeat and PH domains 2 (Acap2), mRNA [NM_001034006]                                                                                                                  | <b>19,419</b> |
| 0            | TGF-beta activated kinase 1/MAP3K7 binding protein 3 Gene [Source:MGI Symbol;Acc:MGI:1913974] [ENSRNOT00000004854]                                                                                                       | <b>19,414</b> |
| Cxxc1        | Rattus norvegicus CXXC finger 1 (PHD domain) (Cxxc1), mRNA [NM_001079698]                                                                                                                                                | <b>19,394</b> |
| Fzr1         | Rattus norvegicus fizzy/cell division cycle 20 related 1 (Drosophila) (Fzr1), mRNA [NM_001108074]                                                                                                                        | <b>19,392</b> |
| LOC100233213 | Rattus norvegicus hypothetical protein LOC100233213 (LOC100233213), mRNA [NM_001143803]                                                                                                                                  | <b>19,390</b> |
| Cndp1        | Rattus norvegicus carnosine dipeptidase 1 (metallopeptidase M20 family) (Cndp1), mRNA [NM_001007687]                                                                                                                     | <b>19,387</b> |
| Adcyap1r1    | Rattus norvegicus adenylate cyclase activating polypeptide 1 receptor 1 (Adcyap1r1), mRNA [NM_133511]                                                                                                                    | <b>19,383</b> |
| 0            | Unknown                                                                                                                                                                                                                  | <b>19,378</b> |

|            |                                                                                                                                                |               |
|------------|------------------------------------------------------------------------------------------------------------------------------------------------|---------------|
| Suclg2     | Rattus norvegicus succinate-CoA ligase, GDP-forming, beta subunit (Suclg2), nuclear gene encoding mitochondrial protein, mRNA [NM_001100750]   | <b>19,374</b> |
| Gpr137b    | Rattus norvegicus G protein-coupled receptor 137B (Gpr137b), mRNA [NM_001105978]                                                               | <b>19,373</b> |
| Ntrk2      | Rattus norvegicus neurotrophic tyrosine kinase, receptor, type 2 (Ntrk2), transcript variant 1, mRNA [NM_012731]                               | <b>19,369</b> |
| Psm3       | Rattus norvegicus proteasome (prosome, macropain) subunit, alpha type 3 (Psm3), mRNA [NM_017280]                                               | <b>19,369</b> |
| Scrg1      | Rattus norvegicus stimulator of chondrogenesis 1 (Scrg1), mRNA [NM_033499]                                                                     | <b>19,367</b> |
| Ganab      | Rattus norvegicus glucosidase, alpha; neutral AB (Ganab), mRNA [NM_001106334]                                                                  | <b>19,366</b> |
| 0          | Q80UV2_MOUSE (Q80UV2) AU042671 protein, partial (40%) [TC598606]                                                                               | <b>19,359</b> |
| Map3k7ip2  | Rattus norvegicus mitogen-activated protein kinase kinase kinase 7 interacting protein 2 (Map3k7ip2), mRNA [NM_001012062]                      | <b>19,350</b> |
| 0          | Rattus norvegicus zinc finger protein 184, mRNA (cDNA clone MGC:156842 IMAGE:7381364), complete cds. [BC128784]                                | <b>19,349</b> |
| RGD1560088 | Uncharacterized protein [Source:UniProtKB/TrEMBL;Acc:D3ZQH7] [ENSRNOT00000047207]                                                              | <b>19,344</b> |
| LOC680370  | Rattus norvegicus hypothetical protein LOC680370 (LOC680370), mRNA [NM_001109402]                                                              | <b>19,342</b> |
| Rgs20      | Rattus norvegicus regulator of G-protein signaling 20 (Rgs20), mRNA [NM_001127495]                                                             | <b>19,341</b> |
| Fkbp1a     | Rattus norvegicus FK506 binding protein 1a (Fkbp1a), mRNA [NM_013102]                                                                          | <b>19,341</b> |
| Gli3       | Rattus norvegicus GLI-Kruppel family member GLI3 (Gli3), mRNA [NM_080405]                                                                      | <b>19,340</b> |
| Abhd14b    | Rattus norvegicus abhydrolase domain containing 14b (Abhd14b), mRNA [NM_001007664]                                                             | <b>19,337</b> |
| Elovl4     | Rattus norvegicus elongation of very long chain fatty acids (FEN1/Elo2, SUR4/Elo3, yeast)-like 4 (Elovl4), mRNA [NM_001191796]                 | <b>19,337</b> |
| Pars2      | Rattus norvegicus prolyl-tRNA synthetase 2, mitochondrial (putative) (Pars2), nuclear gene encoding mitochondrial protein, mRNA [NM_001014064] | <b>19,337</b> |
| LOC362795  | Rattus norvegicus immunoglobulin G heavy chain, mRNA (cDNA clone IMAGE:7385053). [BC098733]                                                    | <b>19,336</b> |
| RGD1310495 | Uncharacterized protein [Source:UniProtKB/TrEMBL;Acc:D3ZDM4] [ENSRNOT00000000720]                                                              | <b>19,334</b> |
| Mn1        | Rattus norvegicus meningioma 1 (Mn1), mRNA [NM_001191928]                                                                                      | <b>19,333</b> |
| Grm1       | Rattus norvegicus glutamate receptor, metabotropic 1 (Grm1), transcript variant 1, mRNA [NM_017011]                                            | <b>19,332</b> |
| 0          | Unknown                                                                                                                                        | <b>19,330</b> |
| Arid5b     | Rattus norvegicus AT rich interactive domain 5B (Mrf1 like) (Arid5b), mRNA [NM_001107624]                                                      | <b>19,329</b> |
| LOC688948  | Uncharacterized protein [Source:UniProtKB/TrEMBL;Acc:D4AAJ9] [ENSRNOT00000041748]                                                              | <b>19,325</b> |
| Hpcal4     | Rattus norvegicus hippocalcin-like 4 (Hpcal4), mRNA [NM_017357]                                                                                | <b>19,325</b> |
| Acvr1c     | Rattus norvegicus activin A receptor, type IC (Acvr1c), mRNA [NM_139090]                                                                       | <b>19,324</b> |
| 0          | Uncharacterized protein [Source:UniProtKB/TrEMBL;Acc:D3ZNE4] [ENSRNOT00000056975]                                                              | <b>19,321</b> |
| 0          | Unknown                                                                                                                                        | <b>19,312</b> |
| Slitrk2    | Rattus norvegicus SLIT and NTRK-like family, member 2 (Slitrk2), mRNA [NM_001107587]                                                           | <b>19,302</b> |
| RGD1564257 | Rattus norvegicus similar to hypothetical protein FLJ32825 (RGD1564257), mRNA [NM_001163723]                                                   | <b>19,294</b> |
| 0          | EST346778 Normalized rat embryo, Bento Soares Rattus sp. cDNA clone RGICV78 5' end, mRNA sequence [AW915474]                                   | <b>19,293</b> |
| LOC499718  | PREDICTED: Rattus norvegicus hypothetical LOC499718 (LOC499718), mRNA [XM_001078222]                                                           | <b>19,282</b> |

|              |                                                                                                                                           |        |
|--------------|-------------------------------------------------------------------------------------------------------------------------------------------|--------|
| Kpna3        | Rattus norvegicus karyopherin alpha 3 (Kpna3), mRNA [NM_001014792]                                                                        | 19,280 |
| 0            | Unknown                                                                                                                                   | 19,277 |
| Impa2        | Rattus norvegicus inositol (myo)-1(or 4)-monophosphatase 2 (Impa2), mRNA [NM_172224]                                                      | 19,275 |
| 0            | Potassium voltage-gated channel subfamily C member 2 [Source:UniProtKB/Swiss-Prot;Acc:P22462] [ENSRNOT00000049943]                        | 19,275 |
| Phlpp1       | Rattus norvegicus PH domain and leucine rich repeat protein phosphatase 1 (Phlpp1), mRNA [NM_021657]                                      | 19,268 |
| Nrn1         | Rattus norvegicus neuritin 1 (Nrn1), mRNA [NM_053346]                                                                                     | 19,268 |
| Ankh         | Rattus norvegicus ankylosis, progressive homolog (mouse) (Ankh), mRNA [NM_053714]                                                         | 19,261 |
| RGD1310427   | Rattus norvegicus similar to KIAA0090 protein (RGD1310427), mRNA [NM_001108690]                                                           | 19,254 |
| Kcnp1        | Rattus norvegicus Kv channel-interacting protein 1 (Kcnp1), mRNA [NM_022929]                                                              | 19,252 |
| 0            | Unknown                                                                                                                                   | 19,251 |
| Ap1m1        | Rattus norvegicus adaptor-related protein complex 1, mu 1 subunit (Ap1m1), mRNA [NM_001044239]                                            | 19,247 |
| Pigt         | Rattus norvegicus phosphatidylinositol glycan anchor biosynthesis, class T (Pigt), mRNA [NM_001106540]                                    | 19,244 |
| Ankrd54      | Rattus norvegicus ankyrin repeat domain 54 (Ankrd54), mRNA [NM_001025285]                                                                 | 19,242 |
| Lass2        | Rattus norvegicus LAG1 homolog, ceramide synthase 2 (Lass2), mRNA [NM_001033700]                                                          | 19,241 |
| Phlpp2       | Rattus norvegicus PH domain and leucine rich repeat protein phosphatase 2 (Phlpp2), mRNA [NM_001109131]                                   | 19,240 |
| Aadat        | Rattus norvegicus amino adipate aminotransferase (Aadat), mRNA [NM_017193]                                                                | 19,239 |
| Atp7b        | Rattus norvegicus ATPase, Cu <sup>++</sup> transporting, beta polypeptide (Atp7b), mRNA [NM_012511]                                       | 19,239 |
| Prodh2       | Rattus norvegicus proline dehydrogenase (oxidase) 2 (Prodh2), mRNA [NM_001038588]                                                         | 19,237 |
| LOC691298    | PREDICTED: Rattus norvegicus similar to peptidoglycan recognition protein 2 (LOC691298), mRNA [XM_002729754]                              | 19,236 |
| Slc16a11     | Rattus norvegicus solute carrier family 16 (monocarboxylic acid transporters), member 11 (Slc16a11), mRNA [NM_001105797]                  | 19,234 |
| LOC503202    | PREDICTED: Rattus norvegicus similar to seven transmembrane helix receptor (LOC503202), mRNA [XM_002727072]                               | 19,233 |
| 0            | Unknown                                                                                                                                   | 19,232 |
| Ephb6        | Rattus norvegicus Eph receptor B6 (Ephb6), mRNA [NM_001107857]                                                                            | 19,230 |
| 0            | Neuronal PAS domain protein 3 (Predicted), isoform CRA_aUncharacterized protein [Source:UniProtKB/TrEMBL;Acc:D3ZZI2] [ENSRNOT00000067066] | 19,230 |
| LOC100362981 | LRRGT00010 [Source:UniProtKB/TrEMBL;Acc:Q6TXI9] [ENSRNOT00000047211]                                                                      | 19,227 |
| Klf15        | Rattus norvegicus Kruppel-like factor 15 (Klf15), mRNA [NM_053536]                                                                        | 19,221 |
| Arnt2        | Rattus norvegicus aryl hydrocarbon receptor nuclear translocator 2 (Arnt2), mRNA [NM_012781]                                              | 19,219 |
| Ccna1        | Rattus norvegicus cyclin A1 (Ccna1), mRNA [NM_001011949]                                                                                  | 19,209 |
| 0            | U1 small nuclear ribonucleoprotein C [Source:UniProtKB/TrEMBL;Acc:D3ZCL3] [ENSRNOT00000000586]                                            | 19,208 |
| Suox         | Rattus norvegicus sulfite oxidase (Suox), nuclear gene encoding mitochondrial protein, mRNA [NM_031127]                                   | 19,207 |
| Smo          | Rattus norvegicus smoothed homolog (Drosophila) (Smo), mRNA [NM_012807]                                                                   | 19,193 |
| 0            | Unknown                                                                                                                                   | 19,189 |
| Igf1         | Rattus norvegicus insulin-like growth factor 1 (Igf1), transcript variant 4, mRNA [NM_001082479]                                          | 19,181 |



|           |                                                                                                                                                            |               |
|-----------|------------------------------------------------------------------------------------------------------------------------------------------------------------|---------------|
| Pdgfa     | Rattus norvegicus platelet-derived growth factor alpha polypeptide (Pdgfa), mRNA [NM_012801]                                                               | <b>19,169</b> |
| 0         | Uncharacterized protein [Source:UniProtKB/TrEMBL;Acc:D3ZAP4] [ENSRNOT00000020882]                                                                          | <b>19,165</b> |
| Srm       | Rattus norvegicus spermidine synthase (Srm), mRNA [NM_053464]                                                                                              | <b>19,163</b> |
| 0         | Unknown                                                                                                                                                    | <b>19,154</b> |
| Kcnip3    | Rattus norvegicus Kv channel interacting protein 3, calsenilin (Kcnip3), mRNA [NM_032462]                                                                  | <b>19,148</b> |
| 0         | Uncharacterized protein [Source:UniProtKB/TrEMBL;Acc:D4A9W8] [ENSRNOT00000014537]                                                                          | <b>19,147</b> |
| 0         | Unknown                                                                                                                                                    | <b>19,147</b> |
| Hs3st1    | Rattus norvegicus heparan sulfate (glucosamine) 3-O-sulfotransferase 1 (Hs3st1), mRNA [NM_053391]                                                          | <b>19,146</b> |
| Zfp423    | Rattus norvegicus zinc finger protein 423 (Zfp423), mRNA [NM_053583]                                                                                       | <b>19,138</b> |
| Kcnk5     | Rattus norvegicus potassium channel, subfamily K, member 5 (Kcnk5), mRNA [NM_001039516]                                                                    | <b>19,138</b> |
| Acta2     | Rattus norvegicus smooth muscle alpha-actin (Acta2), mRNA [NM_031004]                                                                                      | <b>19,138</b> |
| Hs2st1    | Rattus norvegicus heparan sulfate 2-O-sulfotransferase 1 (Hs2st1), mRNA [NM_001100518]                                                                     | <b>19,117</b> |
| Tnpo3     | Rattus norvegicus transportin 3 (Tnpo3), mRNA [NM_001106587]                                                                                               | <b>19,116</b> |
| 0         | SAGA-associated factor 29 homolog [Source:UniProtKB/Swiss-Prot;Acc:P0C606] [ENSRNOT00000026146]                                                            | <b>19,114</b> |
| Zfp91     | Rattus norvegicus zinc finger protein 91 (Zfp91), mRNA [NM_001169120]                                                                                      | <b>19,113</b> |
| Sfrs15    | Rattus norvegicus splicing factor, arginine/serine-rich 15 (Sfrs15), mRNA [NM_001037347]                                                                   | <b>19,105</b> |
| 0         | Uncharacterized protein [Source:UniProtKB/TrEMBL;Acc:D3ZAS6] [ENSRNOT00000000895]                                                                          | <b>19,102</b> |
| Tcn2      | Rattus norvegicus transcobalamin 2 (Tcn2), mRNA [NM_022534]                                                                                                | <b>19,095</b> |
| Notch3    | Rattus norvegicus Notch homolog 3 (Drosophila) (Notch3), mRNA [NM_020087]                                                                                  | <b>19,094</b> |
| Rai1      | Uncharacterized protein [Source:UniProtKB/TrEMBL;Acc:D4A4Z4] [ENSRNOT00000039411]                                                                          | <b>19,082</b> |
| 0         | PREDICTED: Rattus norvegicus similar to minichromosome maintenance protein 8 isoform 1 (RGD1560557), miscRNA [XR_007676]                                   | <b>19,080</b> |
| Adprh     | Rattus norvegicus ADP-ribosylarginine hydrolase (Adprh), mRNA [NM_183325]                                                                                  | <b>19,070</b> |
| 0         | Rattus norvegicus similar to px19-like protein (LOC309182), mRNA [XM_219534]                                                                               | <b>19,070</b> |
| Rrm2      | Rattus norvegicus ribonucleotide reductase M2 (Rrm2), mRNA [NM_001025740]                                                                                  | <b>19,068</b> |
| Cd93      | Rattus norvegicus CD93 molecule (Cd93), mRNA [NM_053383]                                                                                                   | <b>19,067</b> |
| G4        | Rattus norvegicus G4 protein (G4), mRNA [NM_001003975]                                                                                                     | <b>19,062</b> |
| 0         | Unknown                                                                                                                                                    | <b>19,060</b> |
| 0         | Unknown                                                                                                                                                    | <b>19,059</b> |
| Eno2      | Gamma-enolase [Source:UniProtKB/Swiss-Prot;Acc:P07323] [ENSRNOT00000005601]                                                                                | <b>19,057</b> |
| LOC688421 | PREDICTED: Rattus norvegicus similar to Spetex-2C protein (LOC688421), mRNA [XM_001066867]                                                                 | <b>19,057</b> |
| C1ql1     | Rattus norvegicus complement component 1, q subcomponent-like 1 (C1ql1), mRNA [NM_001108838]                                                               | <b>19,052</b> |
| 0         | Protein tyrosine phosphatase, receptor type, B (Predicted), isoform CRA_bUncharacterized protein [Source:UniProtKB/TrEMBL;Acc:D3ZE19] [ENSRNOT00000058384] | <b>19,045</b> |
| Msl3l2    | Rattus norvegicus male-specific lethal 3-like 2 (Drosophila) (Msl3l2), mRNA [NM_001014032]                                                                 | <b>19,045</b> |

|            |                                                                                                                                                          |               |
|------------|----------------------------------------------------------------------------------------------------------------------------------------------------------|---------------|
| Bat3       | Rattus norvegicus HLA-B-associated transcript 3 (Bat3), transcript variant 2, mRNA [NM_053609]                                                           | <b>19,044</b> |
| RGD1310686 | Rattus norvegicus similar to chromosome 16 open reading frame 5 (RGD1310686), mRNA [NM_001008360]                                                        | <b>19,038</b> |
| 0          | Rattus norvegicus, 25 clones, strain BN/SsNHsdMCW RNOR03324481, whole genome shotgun sequence [AABR03128056]                                             | <b>19,037</b> |
| Stxbp2     | Rattus norvegicus syntaxin binding protein 2 (Stxbp2), mRNA [NM_031126]                                                                                  | <b>19,035</b> |
| 0          | Unknown                                                                                                                                                  | <b>19,033</b> |
| Syngap1    | Rattus norvegicus synaptic Ras GTPase activating protein 1 homolog (rat) (Syngap1), transcript variant 1, mRNA [NM_181092]                               | <b>19,029</b> |
| Gdf10      | Rattus norvegicus growth differentiation factor 10 (Gdf10), mRNA [NM_024375]                                                                             | <b>19,029</b> |
| Gpr123     | Rattus norvegicus G protein-coupled receptor 123 (Gpr123), mRNA [NM_001107559]                                                                           | <b>19,028</b> |
| Amph       | Rattus norvegicus amphiphysin (Amph), mRNA [NM_022217]                                                                                                   | <b>19,026</b> |
| Hif1a      | Rattus norvegicus hypoxia-inducible factor 1, alpha subunit (basic helix-loop-helix transcription factor) (Hif1a), mRNA [NM_024359]                      | <b>19,021</b> |
| LOC689587  | PREDICTED: Rattus norvegicus similar to chromosome 9 open reading frame 79 (LOC689587), mRNA [XM_001071271]                                              | <b>19,013</b> |
| Gapdh      | Rattus norvegicus glyceraldehyde-3-phosphate dehydrogenase (Gapdh), mRNA [NM_017008]                                                                     | <b>19,010</b> |
| RGD1305938 | Rattus norvegicus TL0AAA77YA11 mRNA sequence. [FQ211901]                                                                                                 | <b>19,009</b> |
| Snx10      | Rattus norvegicus sorting nexin 10 (Snx10), mRNA [NM_001013085]                                                                                          | <b>19,008</b> |
| 0          | Unknown                                                                                                                                                  | <b>19,005</b> |
| Mlx        | Rattus norvegicus MAX-like protein X (Mlx), mRNA [NM_001034112]                                                                                          | <b>19,004</b> |
| Nxph3      | Neurexophilin-3 [Source:UniProtKB/Swiss-Prot;Acc:Q9Z2N5] [ENSRNOT00000007133]                                                                            | <b>19,004</b> |
| Rnf123     | Rattus norvegicus ring finger protein 123 (Rnf123), mRNA [NM_001191580]                                                                                  | <b>18,998</b> |
| Lphn2      | Rattus norvegicus latrophilin 2 (Lphn2), transcript variant 1, mRNA [NM_134408]                                                                          | <b>18,998</b> |
| Sec24a     | Rattus norvegicus SEC24 family, member A (S. cerevisiae) (Sec24a), mRNA [NM_001105780]                                                                   | <b>18,996</b> |
| Smpd3      | Rattus norvegicus sphingomyelin phosphodiesterase 3, neutral membrane (Smpd3), mRNA [NM_053605]                                                          | <b>18,996</b> |
| Ptprn2     | Rattus norvegicus protein tyrosine phosphatase, receptor type, N polypeptide 2 (Ptprn2), mRNA [NM_031600]                                                | <b>18,994</b> |
| 0          | Unknown                                                                                                                                                  | <b>18,989</b> |
| Inpp5j     | Rattus norvegicus inositol polyphosphate-5-phosphatase J (Inpp5j), mRNA [NM_133562]                                                                      | <b>18,984</b> |
| Cyp26b1    | Rattus norvegicus cytochrome P450, family 26, subfamily b, polypeptide 1 (Cyp26b1), mRNA [NM_181087]                                                     | <b>18,979</b> |
| Ptk2b      | Rattus norvegicus PTK2B protein tyrosine kinase 2 beta (Ptk2b), mRNA [NM_017318]                                                                         | <b>18,977</b> |
| 0          | Unknown                                                                                                                                                  | <b>18,976</b> |
| Khdrbs2    | Rattus norvegicus KH domain containing, RNA binding, signal transduction associated 2 (Khdrbs2), mRNA [NM_133318]                                        | <b>18,974</b> |
| Tomm22     | Rattus norvegicus translocase of outer mitochondrial membrane 22 homolog (yeast) (Tomm22), nuclear gene encoding mitochondrial protein, mRNA [NM_212514] | <b>18,971</b> |
| Kctd11     | Rattus norvegicus potassium channel tetramerisation domain containing 11 (Kctd11), mRNA [NM_001108831]                                                   | <b>18,970</b> |
| Cyb561d1   | Rattus norvegicus cytochrome b-561 domain containing 1 (Cyb561d1), mRNA [NM_001108562]                                                                   | <b>18,970</b> |
| Gtf3c6     | Rattus norvegicus general transcription factor IIIC, polypeptide 6, alpha (Gtf3c6), mRNA [NM_001108537]                                                  | <b>18,969</b> |
| Ddah1      | Rattus norvegicus dimethylarginine dimethylaminohydrolase 1 (Ddah1), mRNA [NM_022297]                                                                    | <b>18,968</b> |

|           |                                                                                                                    |               |
|-----------|--------------------------------------------------------------------------------------------------------------------|---------------|
| Ttc17     | Rattus norvegicus tetratricopeptide repeat domain 17 (Ttc17), mRNA [NM_001107752]                                  | <b>18,966</b> |
| Sptan1    | Rattus norvegicus spectrin, alpha, non-erythrocytic 1 (Sptan1), mRNA [NM_171983]                                   | <b>18,965</b> |
| Vps37d    | Rattus norvegicus similar to vacuolar protein sorting 37D (LOC687208), mRNA [NM_001128193]                         | <b>18,963</b> |
| Gba       | Rattus norvegicus glucosidase, beta, acid (Gba), mRNA [NM_001127639]                                               | <b>18,959</b> |
| Zc3h7b    | Rattus norvegicus zinc finger CCCH-type containing 7B (Zc3h7b), mRNA [NM_001130695]                                | <b>18,958</b> |
| LOC682968 | PREDICTED: Rattus norvegicus similar to Retinal homeobox protein Rx (DRx1) (DRx) (LOC682968), mRNA [XM_001063896]  | <b>18,957</b> |
| Snx17     | Rattus norvegicus sorting nexin 17 (Snx17), mRNA [NM_001011981]                                                    | <b>18,956</b> |
| Gramd2    | Uncharacterized protein [Source:UniProtKB/TrEMBL;Acc:D3ZIZ1] [ENSRNOT00000036798]                                  | <b>18,949</b> |
| 0         | Uncharacterized protein [Source:UniProtKB/TrEMBL;Acc:D3ZFR5] [ENSRNOT00000016784]                                  | <b>18,949</b> |
| Ankrd17   | Rattus norvegicus ankyrin repeat domain 17 (Ankrd17), mRNA [NM_001105999]                                          | <b>18,948</b> |
| 0         | Rattus norvegicus similar to putative pheromone receptor (LOC301894), mRNA [XM_229376]                             | <b>18,946</b> |
| Cspg4     | Rattus norvegicus chondroitin sulfate proteoglycan 4 (Cspg4), mRNA [NM_031022]                                     | <b>18,944</b> |
| Khsrp     | Rattus norvegicus KH-type splicing regulatory protein (Khsrp), mRNA [NM_133602]                                    | <b>18,944</b> |
| Ascl1     | Rattus norvegicus achaete-scute complex homolog 1 (Drosophila) (Ascl1), mRNA [NM_022384]                           | <b>18,943</b> |
| 0         | Uncharacterized protein [Source:UniProtKB/TrEMBL;Acc:D3ZU72] [ENSRNOT00000059829]                                  | <b>18,943</b> |
| Wwc2      | Rattus norvegicus WW and C2 domain containing 2 (Wwc2), mRNA [NM_001109111]                                        | <b>18,943</b> |
| 39508     | Rattus norvegicus membrane-associated ring finger (C3HC4) 8 (March8), mRNA [NM_001107882]                          | <b>18,940</b> |
| Hcn3      | Rattus norvegicus hyperpolarization-activated cyclic nucleotide-gated potassium channel 3 (Hcn3), mRNA [NM_053685] | <b>18,939</b> |
| Ifngr2    | Rattus norvegicus interferon gamma receptor 2 (Ifngr2), mRNA [NM_001108313]                                        | <b>18,933</b> |
| 0         | Unknown                                                                                                            | <b>18,930</b> |
| Ergic3    | Rattus norvegicus ERGIC and golgi 3 (Ergic3), mRNA [NM_001106533]                                                  | <b>18,922</b> |
| Fgf13     | Rattus norvegicus fibroblast growth factor 13 (Fgf13), mRNA [NM_053428]                                            | <b>18,919</b> |
| Znf503    | Rattus norvegicus zinc finger protein 503 (Znf503), mRNA [NM_001107250]                                            | <b>18,918</b> |
| Nhlh1     | Rattus norvegicus nescient helix loop helix 1 (Nhlh1), mRNA [NM_001105970]                                         | <b>18,916</b> |
| LOC687001 | Rattus norvegicus similar to histone deacetylase 9 isoform 5 (LOC687001), mRNA [NM_001200045]                      | <b>18,913</b> |
| Max       | Rattus norvegicus MYC associated factor X (Max), mRNA [NM_022210]                                                  | <b>18,910</b> |
| Tmem184b  | Rattus norvegicus transmembrane protein 184B (Tmem184b), mRNA [NM_001173370]                                       | <b>18,909</b> |
| 0         | Unknown                                                                                                            | <b>18,909</b> |
| Ube2q1    | Rattus norvegicus ubiquitin-conjugating enzyme E2Q family-like 1 (Ube2q1), mRNA [NM_001145163]                     | <b>18,908</b> |
| Cenpn     | Rattus norvegicus centromere protein N (Cenpn), mRNA [NM_001008366]                                                | <b>18,902</b> |
| Ugt2b5    | Rattus norvegicus UDP glucuronosyltransferase 2 family, polypeptide B5 (Ugt2b5), mRNA [NM_153314]                  | <b>18,900</b> |
| Rasl12    | Rattus norvegicus RAS-like, family 12 (Rasl12), mRNA [NM_001108162]                                                | <b>18,895</b> |
| 0         | Unknown                                                                                                            | <b>18,895</b> |
| Ppat      | Rattus norvegicus phosphoribosyl pyrophosphate amidotransferase (Ppat), mRNA [NM_057198]                           | <b>18,892</b> |

|           |                                                                                                                               |        |
|-----------|-------------------------------------------------------------------------------------------------------------------------------|--------|
| Clstn3    | Rattus norvegicus calsyntenin 3 (Clstn3), mRNA [NM_134376]                                                                    | 18,890 |
| Stac      | PREDICTED: Rattus norvegicus SH3 and cysteine rich domain (Stac), mRNA [XM_001076458]                                         | 18,887 |
| Zmat3     | Rattus norvegicus zinc finger, matrin type 3 (Zmat3), mRNA [NM_022548]                                                        | 18,887 |
| Cd44      | Rattus norvegicus Cd44 molecule (Cd44), mRNA [NM_012924]                                                                      | 18,887 |
| Jph4      | Rattus norvegicus junctophilin 4 (Jph4), mRNA [NM_001003711]                                                                  | 18,884 |
| Sox6      | Rattus norvegicus SRY (sex determining region Y)-box 6 (Sox6), mRNA [NM_001024751]                                            | 18,882 |
| Dcun1d4   | Rattus norvegicus DCN1, defective in cullin neddylation 1, domain containing 4 (S. cerevisiae) (Dcun1d4), mRNA [NM_001108359] | 18,881 |
| Xrra1     | Rattus norvegicus X-ray radiation resistance associated 1 (Xrra1), mRNA [NM_001113753]                                        | 18,880 |
| Mt2A      | Rattus norvegicus metallothionein 2A (Mt2A), mRNA [NM_001137564]                                                              | 18,879 |
| 0         | Unknown                                                                                                                       | 18,877 |
| LOC303448 | Rattus norvegicus similar to glyceraldehyde-3-phosphate dehydrogenase (LOC303448), mRNA [NM_001037190]                        | 18,867 |
| Jazf1     | PREDICTED: Rattus norvegicus JAZF zinc finger 1 (Jazf1), mRNA [XM_002726367]                                                  | 18,860 |
| 0         | Unknown                                                                                                                       | 18,857 |
| Mamstr    | Uncharacterized protein [Source:UniProtKB/TrEMBL;Acc:D3ZHU3] [ENSRNOT00000029167]                                             | 18,857 |
| 0         | Unknown                                                                                                                       | 18,857 |
| Bag3      | Rattus norvegicus Bcl2-associated athanogene 3 (Bag3), mRNA [NM_001011936]                                                    | 18,848 |
| 0         | Unknown                                                                                                                       | 18,846 |
| Pppde2    | Rattus norvegicus PPPDE peptidase domain containing 2 (Pppde2), mRNA [NM_001025703]                                           | 18,846 |
| Nt5dc3    | Rattus norvegicus 5'-nucleotidase domain containing 3 (Nt5dc3), mRNA [NM_001134887]                                           | 18,844 |
| Kcnd1     | Rattus norvegicus potassium voltage-gated channel, Shal-related subfamily, member 1 (Kcnd1), mRNA [NM_001105748]              | 18,840 |
| RGD735065 | Rattus norvegicus similar to Gl:13385412-like protein splice form I (RGD735065), mRNA [NM_199379]                             | 18,837 |
| Msx1      | Rattus norvegicus msh homeobox 1 (Msx1), mRNA [NM_031059]                                                                     | 18,835 |
| Cdh11     | Rattus norvegicus cadherin 11 (Cdh11), mRNA [NM_053392]                                                                       | 18,833 |
| Clvs1     | Rattus norvegicus clavesin 1 (Clvs1), mRNA [NM_001108969]                                                                     | 18,832 |
| Kcne1l    | Rattus norvegicus potassium voltage-gated channel, Isk-related family, member 1-like (Kcne1l), mRNA [NM_001101003]            | 18,827 |
| Fam117b   | Rattus norvegicus family with sequence similarity 117, member B (Fam117b), mRNA [NM_001108797]                                | 18,826 |
| Mfap2     | Rattus norvegicus microfibrillar-associated protein 2 (Mfap2), mRNA [NM_001107989]                                            | 18,825 |
| Dnah10    | PREDICTED: Rattus norvegicus dynein, axonemal, heavy polypeptide 10 (Dnah10), mRNA [XM_001078937]                             | 18,824 |
| Fmo1      | Rattus norvegicus flavin containing monooxygenase 1 (Fmo1), mRNA [NM_012792]                                                  | 18,822 |
| Kcna6     | Rattus norvegicus potassium voltage gated channel, shaker related subfamily, member 6 (Kcna6), mRNA [NM_023954]               | 18,818 |
| Tmem132b  | Rattus norvegicus transmembrane protein 132B (Tmem132b), mRNA [NM_001134536]                                                  | 18,815 |
| Mpped1    | Rattus norvegicus metallophosphoesterase domain containing 1 (Mpped1), mRNA [NM_001130569]                                    | 18,814 |
| Defb27    | Rattus norvegicus defensin beta 27 (Defb27), mRNA [NM_001037519]                                                              | 18,814 |
| 0         | Rattus norvegicus similar to citrate synthase; citrate synthase precursor (LOC299750), mRNA [XM_235086]                       | 18,813 |

|            |                                                                                                                                      |               |
|------------|--------------------------------------------------------------------------------------------------------------------------------------|---------------|
| Phb        | Rattus norvegicus prohibitin (Phb), mRNA [NM_031851]                                                                                 | <b>18,813</b> |
| RGD1563482 | Rattus norvegicus similar to hypothetical protein FLJ38663 (RGD1563482), mRNA [NM_001109065]                                         | <b>18,810</b> |
| Reln       | Rattus norvegicus reelin (Reln), mRNA [NM_080394]                                                                                    | <b>18,808</b> |
| Zfp280d    | Rattus norvegicus zinc finger protein 280D (Zfp280d), mRNA [NM_001108165]                                                            | <b>18,804</b> |
| 0          | kelch repeat and BTB domain-containing protein 4 [Source:RefSeq peptide;Acc:NP_001101216] [ENSRNOT00000012876]                       | <b>18,798</b> |
| Dpysl2     | Rattus norvegicus dihydropyrimidinase-like 2 (Dpysl2), mRNA [NM_001105717]                                                           | <b>18,797</b> |
| Prrxl1     | Rattus norvegicus paired related homeobox protein-like 1 (Prrxl1), mRNA [NM_145767]                                                  | <b>18,797</b> |
| Dcaf4      | Rattus norvegicus DDB1 and CUL4 associated factor 4 (Dcaf4), mRNA [NM_001108716]                                                     | <b>18,791</b> |
| RGD1309492 | Rattus norvegicus similar to mKIAA1737 protein (RGD1309492), mRNA [NM_001108044]                                                     | <b>18,787</b> |
| 0          | Calcipressin-2 [Source:UniProtKB/Swiss-Prot;Acc:Q8CH27] [ENSRNOT00000029593]                                                         | <b>18,779</b> |
| Pabpc4     | Rattus norvegicus poly(A) binding protein, cytoplasmic 4 (Pabpc4), mRNA [NM_001100538]                                               | <b>18,778</b> |
| LOC689786  | PREDICTED: Rattus norvegicus similar to ribosomal protein L35a (LOC689786), mRNA [XM_001072004]                                      | <b>18,774</b> |
| 0          | Unknown                                                                                                                              | <b>18,774</b> |
| Pus10      | Rattus norvegicus pseudouridylate synthase 10 (Pus10), mRNA [NM_001025278]                                                           | <b>18,771</b> |
| Fam81a     | Rattus norvegicus family with sequence similarity 81, member A (Fam81a), mRNA [NM_001108163]                                         | <b>18,768</b> |
| Psmf1      | Rattus norvegicus proteasome inhibitor subunit 1 (Psmf1), mRNA [NM_001101005]                                                        | <b>18,766</b> |
| Nlk        | Rattus norvegicus nemo like kinase (Nlk), mRNA [NM_001191924]                                                                        | <b>18,764</b> |
| Slc19a2    | Rattus norvegicus solute carrier family 19 (thiamine transporter), member 2 (Slc19a2), mRNA [NM_001030024]                           | <b>18,762</b> |
| Fcgr2a     | Rattus norvegicus Fc fragment of IgG, low affinity IIa, receptor (CD32) (Fcgr2a), mRNA [NM_053843]                                   | <b>18,762</b> |
| Dclk1      | Rattus norvegicus doublecortin-like kinase 1 (Dclk1), transcript variant 1, mRNA [NM_053343]                                         | <b>18,760</b> |
| Thrap3     | Rattus norvegicus thyroid hormone receptor associated protein 3 (Thrap3), mRNA [NM_001009693]                                        | <b>18,749</b> |
| Trpv1      | Rattus norvegicus transient receptor potential cation channel, subfamily V, member 1 (Trpv1), mRNA [NM_031982]                       | <b>18,748</b> |
| LOC686076  | PREDICTED: Rattus norvegicus similar to suppressor of initiator codon mutations, related sequence 1 (LOC686076), mRNA [XM_001066439] | <b>18,746</b> |
| Ncam2      | Rattus norvegicus fasciclin II GPI-linked protein isoform mRNA, complete cds. [AY495696]                                             | <b>18,744</b> |
| Arx        | Rattus norvegicus aristaless related homeobox (Arx), mRNA [NM_001100174]                                                             | <b>18,742</b> |
| RGD1561149 | Rattus norvegicus similar to mKIAA1522 protein (RGD1561149), mRNA [NM_001134629]                                                     | <b>18,739</b> |
| 0          | Unknown                                                                                                                              | <b>18,735</b> |
| Bag2       | Rattus norvegicus Bcl2-associated athanogene 2 (Bag2), mRNA [NM_001128195]                                                           | <b>18,733</b> |
| 0          | PREDICTED: Rattus norvegicus dachshund homolog 2 (Drosophila) (Dach2), mRNA [XM_001055336]                                           | <b>18,724</b> |
| LOC682812  | PREDICTED: Rattus norvegicus similar to WD repeat domain 40A, transcript variant 3 (LOC682812), mRNA [XM_001059949]                  | <b>18,723</b> |
| Tprkb      | Rattus norvegicus Tp53rk binding protein (Tprkb), mRNA [NM_001013926]                                                                | <b>18,715</b> |
| Thop1      | Rattus norvegicus thimet oligopeptidase 1 (Thop1), mRNA [NM_172075]                                                                  | <b>18,711</b> |
| 0          | Unknown                                                                                                                              | <b>18,708</b> |
| Kctd16     | Rattus norvegicus potassium channel tetramerisation domain containing 16 (Kctd16), mRNA [NM_001172155]                               | <b>18,706</b> |

|            |                                                                                                                                |               |
|------------|--------------------------------------------------------------------------------------------------------------------------------|---------------|
| 0          | Unknown                                                                                                                        | <b>18,706</b> |
| 0          | Uncharacterized protein [Source:UniProtKB/TrEMBL;Acc:D3ZYC5] [ENSRNOT00000043960]                                              | <b>18,702</b> |
| RGD1359127 | Rattus norvegicus similar to RIKEN cDNA 2310011J03 (RGD1359127), mRNA [NM_001007657]                                           | <b>18,702</b> |
| Olr184     | Rattus norvegicus olfactory receptor 184 (Olr184), mRNA [NM_001000182]                                                         | <b>18,694</b> |
| 0          | BC046289 Sec22l3 protein {Mus musculus} (exp=-1; wgp=0; cg=0), complete [TC638555]                                             | <b>18,693</b> |
| Adra1d     | Rattus norvegicus adrenergic, alpha-1D-, receptor (Adra1d), mRNA [NM_024483]                                                   | <b>18,691</b> |
| Glr1b      | Rattus norvegicus glycine receptor, beta (Glr1b), mRNA [NM_053296]                                                             | <b>18,686</b> |
| 0          | UI-R-DY1-com-a-12-0-UI.s1 UI-R-DY1 Rattus norvegicus cDNA clone UI-R-DY1-com-a-12-0-UI 3', mRNA sequence [BQ210702]            | <b>18,685</b> |
| Lhx4       | Rattus norvegicus LIM homeobox 4 (Lhx4), mRNA [NM_001108348]                                                                   | <b>18,681</b> |
| Sfrs4      | Rattus norvegicus splicing factor, arginine/serine-rich 4 (Sfrs4), mRNA [NM_001108685]                                         | <b>18,678</b> |
| Ostm1      | Rattus norvegicus osteopetrosis associated transmembrane protein 1 (Ostm1), mRNA [NM_001029925]                                | <b>18,676</b> |
| Nat13      | Rattus norvegicus N-acetyltransferase 13 (Nat13), mRNA [NM_001105881]                                                          | <b>18,675</b> |
| Serinc2    | Rattus norvegicus serine incorporator 2 (Serinc2), mRNA [NM_001031656]                                                         | <b>18,673</b> |
| Pcdhga7    | Rattus norvegicus protocadherin gamma subfamily A, 7 (Pcdhga7), mRNA [NM_001014773]                                            | <b>18,673</b> |
| Clec12b    | Rattus norvegicus C-type lectin domain family 12, member B (Clec12b), mRNA [NM_001109353]                                      | <b>18,669</b> |
| Cacna1i    | Rattus norvegicus calcium channel, voltage-dependent, T type, alpha 1i subunit (Cacna1i), mRNA [NM_020084]                     | <b>18,668</b> |
| Fgf14      | Rattus norvegicus Fgf14b mRNA for fibroblast growth factor 14b, complete cds. [AB008908]                                       | <b>18,664</b> |
| 0          | Unknown                                                                                                                        | <b>18,663</b> |
| 0          | Unknown                                                                                                                        | <b>18,658</b> |
| Acp2       | Rattus norvegicus acid phosphatase 2, lysosomal (Acp2), mRNA [NM_016988]                                                       | <b>18,655</b> |
| RGD1565170 | Uncharacterized protein [Source:UniProtKB/TrEMBL;Acc:D3ZTX9] [ENSRNOT00000043836]                                              | <b>18,654</b> |
| LOC296235  | Rattus norvegicus similar to Cystatin S precursor (LM protein) (LOC296235), mRNA [NM_001037350]                                | <b>18,648</b> |
| 0          | Unknown                                                                                                                        | <b>18,648</b> |
| Fads2      | Rattus norvegicus fatty acid desaturase 2 (Fads2), mRNA [NM_031344]                                                            | <b>18,636</b> |
| Nudt5      | Rattus norvegicus nudix (nucleoside diphosphate linked moiety X)-type motif 5 (Nudt5), mRNA [NM_001007733]                     | <b>18,636</b> |
| Nr3c2      | Rattus norvegicus nuclear receptor subfamily 3, group C, member 2 (Nr3c2), mRNA [NM_013131]                                    | <b>18,635</b> |
| Fgf12      | Rattus norvegicus fibroblast growth factor 12 (Fgf12), mRNA [NM_130814]                                                        | <b>18,633</b> |
| Ka11       | Rattus norvegicus type I keratin KA11 (Ka11), mRNA [NM_001008750]                                                              | <b>18,627</b> |
| 0          | Unknown                                                                                                                        | <b>18,622</b> |
| Tnnt2      | Rattus norvegicus troponin T type 2 (cardiac) (Tnnt2), mRNA [NM_012676]                                                        | <b>18,620</b> |
| Ppfibp1    | Rattus norvegicus PTPRF interacting protein, binding protein 1 (liprin beta 1) (Ppfibp1), mRNA [NM_001107896]                  | <b>18,616</b> |
| Bcl2l1     | Rattus norvegicus Bcl2-like 1 (Bcl2l1), nuclear gene encoding mitochondrial protein, transcript variant 3, mRNA [NM_001033670] | <b>18,615</b> |
| Ndr3       | Rattus norvegicus N-myc downstream regulated gene 3 (Ndr3), mRNA [NM_001013923]                                                | <b>18,611</b> |
| 0          | Unknown                                                                                                                        | <b>18,607</b> |

|            |                                                                                                                                             |               |
|------------|---------------------------------------------------------------------------------------------------------------------------------------------|---------------|
| Sufu       | Rattus norvegicus suppressor of fused homolog (Drosophila) (Sufu), mRNA [NM_001024899]                                                      | <b>18,607</b> |
| Smek2      | Rattus norvegicus SMEK homolog 2, suppressor of mek1 (Dictyostelium) (Smek2), mRNA [NM_001108367]                                           | <b>18,604</b> |
| Dll4       | Rattus norvegicus delta-like 4 (Drosophila) (Dll4), mRNA [NM_001107760]                                                                     | <b>18,603</b> |
| Bard1      | Rattus norvegicus BRCA1 associated RING domain 1 (Bard1), mRNA [NM_022622]                                                                  | <b>18,596</b> |
| RGD1562211 | Rattus norvegicus similar to ubiquitin specific protease 51 (RGD1562211), mRNA [NM_001108252]                                               | <b>18,595</b> |
| Aldh3a2    | Rattus norvegicus aldehyde dehydrogenase 3 family, member A2 (Aldh3a2), mRNA [NM_031731]                                                    | <b>18,594</b> |
| MGC114464  | Rattus norvegicus similar to expressed sequence AI836003 (MGC114464), mRNA [NM_001024909]                                                   | <b>18,591</b> |
| Ramp1      | Rattus norvegicus receptor (G protein-coupled) activity modifying protein 1 (Ramp1), mRNA [NM_031645]                                       | <b>18,583</b> |
| Ankrd57    | Rattus norvegicus ankyrin repeat domain 57 (Ankrd57), mRNA [NM_001109364]                                                                   | <b>18,581</b> |
| Prosc      | Rattus norvegicus proline synthetase co-transcribed homolog (bacterial) (Prosc), mRNA [NM_001107320]                                        | <b>18,574</b> |
| Calu       | Rattus norvegicus calumenin (Calu), transcript variant 2, mRNA [NM_001033898]                                                               | <b>18,573</b> |
| 0          | Unknown                                                                                                                                     | <b>18,571</b> |
| 0          | Histone deacetylase 7 [Source:UniProtKB/Swiss-Prot;Acc:Q99P96] [ENSRNOT00000011159]                                                         | <b>18,568</b> |
| 0          | Unknown                                                                                                                                     | <b>18,560</b> |
| 0          | Unknown                                                                                                                                     | <b>18,557</b> |
| Mybl2      | Rattus norvegicus myeloblastosis oncogene-like 2 (Mybl2), mRNA [NM_001106536]                                                               | <b>18,555</b> |
| Kpna6      | Rattus norvegicus karyopherin alpha 6 (importin alpha 7) (Kpna6), mRNA [NM_001015029]                                                       | <b>18,554</b> |
| 0          | Uncharacterized protein [Source:UniProtKB/TrEMBL;Acc:D3ZKX0] [ENSRNOT00000022136]                                                           | <b>18,552</b> |
| Siat7F     | Rattus norvegicus sialyltransferase 7F (Siat7F), mRNA [NM_001015036]                                                                        | <b>18,547</b> |
| Wdr70      | Rattus norvegicus WD repeat domain 70 (Wdr70), mRNA [NM_001013909]                                                                          | <b>18,539</b> |
| Gpd2       | Rattus norvegicus glycerol-3-phosphate dehydrogenase 2, mitochondrial (Gpd2), nuclear gene encoding mitochondrial protein, mRNA [NM_012736] | <b>18,536</b> |
| Sertad2    | Rattus norvegicus SERTA domain containing 2 (Sertad2), mRNA [NM_001024903]                                                                  | <b>18,534</b> |
| Utp15      | Rattus norvegicus UTP15, U3 small nucleolar ribonucleoprotein, homolog (S. cerevisiae) (Utp15), mRNA [NM_001107647]                         | <b>18,533</b> |
| Hsf1       | Rattus norvegicus heat shock transcription factor 1 (Hsf1), mRNA [NM_024393]                                                                | <b>18,526</b> |
| Htr5a      | Rattus norvegicus 5-hydroxytryptamine (serotonin) receptor 5A (Htr5a), mRNA [NM_013148]                                                     | <b>18,526</b> |
| Zbbx       | Rattus norvegicus zinc finger, B-box domain containing (Zbbx), mRNA [NM_001029922]                                                          | <b>18,523</b> |
| RGD1565725 | PREDICTED: Rattus norvegicus similar to hypothetical protein FLJ23834 (RGD1565725), mRNA [XM_001069513]                                     | <b>18,521</b> |
| Tmod1      | Rattus norvegicus tropomodulin 1 (Tmod1), mRNA [NM_013044]                                                                                  | <b>18,520</b> |
| Eif4g2     | Rattus norvegicus eukaryotic translation initiation factor 4, gamma 2 (Eif4g2), mRNA [NM_001017374]                                         | <b>18,519</b> |
| Cyp4a1     | Rattus norvegicus cytochrome P450, family 4, subfamily a, polypeptide 1 (Cyp4a1), mRNA [NM_175837]                                          | <b>18,519</b> |
| Kif11      | Rattus norvegicus kinesin family member 11 (Kif11), mRNA [NM_001169112]                                                                     | <b>18,518</b> |
| Id4        | Rattus norvegicus inhibitor of DNA binding 4 (Id4), mRNA [NM_175582]                                                                        | <b>18,516</b> |
| Parp11     | Uncharacterized protein [Source:UniProtKB/TrEMBL;Acc:D3ZPT5] [ENSRNOT00000027092]                                                           | <b>18,515</b> |

|              |                                                                                                                |        |
|--------------|----------------------------------------------------------------------------------------------------------------|--------|
| 0            | Unknown                                                                                                        | 18,511 |
| 0            | Unknown                                                                                                        | 18,510 |
| Tctn1        | Rattus norvegicus tectonic family member 1 (Tctn1), mRNA [NM_001177613]                                        | 18,509 |
| 0            | Unknown                                                                                                        | 18,509 |
| Mxi1         | Rattus norvegicus MAX interactor 1 (Mxi1), mRNA [NM_013160]                                                    | 18,506 |
| Polr2e       | Rattus norvegicus polymerase (RNA) II (DNA directed) polypeptide E (Polr2e), mRNA [NM_001109614]               | 18,506 |
| Tbl1xr1      | Rattus norvegicus transducin (beta)-like 1 X-linked receptor 1 (Tbl1xr1), mRNA [NM_001108941]                  | 18,502 |
| Mcm6         | Rattus norvegicus minichromosome maintenance complex component 6 (Mcm6), mRNA [NM_017287]                      | 18,502 |
| 0            | Unknown                                                                                                        | 18,492 |
| Prtfdc1      | Rattus norvegicus phosphoribosyl transferase domain containing 1 (Prtfdc1), mRNA [NM_001106127]                | 18,485 |
| 0            | Rattus norvegicus cdig1U mRNA for hypothetical protein, complete cds. [AB086233]                               | 18,485 |
| Atcay        | Rattus norvegicus ataxia, cerebellar, Cayman type (Atcay), mRNA [NM_001040190]                                 | 18,481 |
| Top3b        | Rattus norvegicus topoisomerase (DNA) III beta (Top3b), mRNA [NM_001105861]                                    | 18,480 |
| LOC100360244 | Rattus norvegicus LRRGT00053-like (LOC100360244), mRNA [NM_001177863]                                          | 18,476 |
| 0            | Unknown                                                                                                        | 18,474 |
| RGD1309534   | Rattus norvegicus similar to RIKEN cDNA 4931406C07 (RGD1309534), mRNA [NM_001014206]                           | 18,467 |
| Ppp2r5e      | Rattus norvegicus protein phosphatase 2, regulatory subunit B', epsilon isoform (Ppp2r5e), mRNA [NM_001106740] | 18,458 |
| 0            | Unknown                                                                                                        | 18,458 |
| 0            | Unknown                                                                                                        | 18,457 |
| Carf         | Rattus norvegicus calcium response factor (Carf), mRNA [NM_001106915]                                          | 18,454 |
| Snap29       | Rattus norvegicus synaptosomal-associated protein 29 (Snap29), mRNA [NM_053810]                                | 18,452 |
| 0            | Unknown                                                                                                        | 18,452 |
| Lhfpl2       | Rattus norvegicus lipoma HMGIC fusion partner-like 2 (Lhfpl2), mRNA [NM_001106402]                             | 18,452 |
| Zim1         | Rattus norvegicus zinc finger, imprinted 1 (Zim1), mRNA [NM_001107473]                                         | 18,452 |
| Fstl1        | Rattus norvegicus follistatin-like 1 (Fstl1), mRNA [NM_024369]                                                 | 18,450 |
| Arid5a       | Rattus norvegicus AT rich interactive domain 5A (Mrf1 like) (Arid5a), mRNA [NM_001034934]                      | 18,450 |
| Adra1a       | Rattus norvegicus adrenergic, alpha-1A-, receptor (Adra1a), mRNA [NM_017191]                                   | 18,450 |
| Pi16         | Rattus norvegicus peptidase inhibitor 16 (Pi16), mRNA [NM_001170481]                                           | 18,443 |
| Iqsec3       | Rattus norvegicus IQ motif and Sec7 domain 3 (Iqsec3), mRNA [NM_207617]                                        | 18,442 |
| RGD1310597   | Rattus norvegicus similar to RIKEN cDNA 1200014M14 (RGD1310597), mRNA [NM_001025647]                           | 18,441 |
| Inha         | Rattus norvegicus inhibin alpha (Inha), mRNA [NM_012590]                                                       | 18,440 |
| Syt2         | Rattus norvegicus synaptotagmin II (Syt2), mRNA [NM_012665]                                                    | 18,439 |
| Sdcbp        | Rattus norvegicus syndecan binding protein (Sdcbp), mRNA [NM_031986]                                           | 18,439 |
| 0            | Unknown                                                                                                        | 18,436 |



|              |                                                                                                                                              |               |
|--------------|----------------------------------------------------------------------------------------------------------------------------------------------|---------------|
| Fbxl5        | Rattus norvegicus F-box and leucine-rich repeat protein 5 (Fbxl5), mRNA [NM_001107222]                                                       | <b>18,433</b> |
| Adcy9        | Rattus norvegicus adenylate cyclase 9 (Adcy9), mRNA [NM_001106980]                                                                           | <b>18,433</b> |
| Aif1l        | Rattus norvegicus allograft inflammatory factor 1-like (Aif1l), mRNA [NM_001108578]                                                          | <b>18,424</b> |
| 0            | TULP3_MOUSE (O88413) Tubby-related protein 3 (Tubby-like protein 3), partial (40%) [TC600284]                                                | <b>18,422</b> |
| Nol4         | Rattus norvegicus nucleolar protein 4 (Nol4), mRNA [NM_001107401]                                                                            | <b>18,416</b> |
| lqcf1        | Rattus norvegicus IQ motif containing F1 (lqcf1), mRNA [NM_001109361]                                                                        | <b>18,415</b> |
| Mdm4         | Rattus norvegicus Mdm4 p53 binding protein homolog (mouse) (Mdm4), mRNA [NM_001012026]                                                       | <b>18,409</b> |
| Lman2l       | Rattus norvegicus lectin, mannose-binding 2-like (Lman2l), mRNA [NM_001106900]                                                               | <b>18,406</b> |
| Camk2n2      | Rattus norvegicus calcium/calmodulin-dependent protein kinase II inhibitor 2 (Camk2n2), mRNA [NM_021678]                                     | <b>18,404</b> |
| Pcgf3        | Rattus norvegicus polycomb group ring finger 3 (Pcgf3), mRNA [NM_001107245]                                                                  | <b>18,404</b> |
| Abi1         | Rattus norvegicus abl-interactor 1 (Abi1), mRNA [NM_024397]                                                                                  | <b>18,403</b> |
| 0            | HUMGLYSYN glycogen synthase kinase 3 {Homo sapiens} (exp=-1; wgp=0; cg=0), partial (4%) [TC645757]                                           | <b>18,401</b> |
| Klhl13       | Klhl13 protein [Source:UniProtKB/TrEMBL;Acc:Q3MHT7] [ENSRNOT00000067114]                                                                     | <b>18,396</b> |
| Trim31       | Rattus norvegicus tripartite motif-containing 31 (Trim31), mRNA [NM_001106376]                                                               | <b>18,393</b> |
| 0            | Unknown                                                                                                                                      | <b>18,385</b> |
| 0            | Unknown                                                                                                                                      | <b>18,382</b> |
| 0            | Similar to RIKEN cDNA B230206N24 (Predicted), isoform CRA_bUncharacterized protein [Source:UniProtKB/TrEMBL;Acc:D3ZQA9] [ENSRNOT00000056493] | <b>18,382</b> |
| Lrrc59       | Rattus norvegicus leucine rich repeat containing 59 (Lrrc59), mRNA [NM_001008280]                                                            | <b>18,377</b> |
| Cbln2        | Rattus norvegicus cerebellin 2 precursor (Cbln2), mRNA [NM_001012740]                                                                        | <b>18,367</b> |
| Ttbk2        | Rattus norvegicus tau tubulin kinase 2 (Ttbk2), mRNA [NM_001107766]                                                                          | <b>18,365</b> |
| Ovol2        | Rattus norvegicus ovo-like 2 (Drosophila) (Ovol2), mRNA [NM_001106519]                                                                       | <b>18,365</b> |
| Gys1         | Rattus norvegicus glycogen synthase 1, muscle (Gys1), mRNA [NM_001109615]                                                                    | <b>18,364</b> |
| Shh          | Rattus norvegicus sonic hedgehog (Shh), mRNA [NM_017221]                                                                                     | <b>18,363</b> |
| Atp11a       | Rattus norvegicus ATPase, class VI, type 11A (Atp11a), mRNA [NM_001107324]                                                                   | <b>18,363</b> |
| LOC690617    | Rattus norvegicus hypothetical protein LOC690617 (LOC690617), mRNA [NM_001109605]                                                            | <b>18,352</b> |
| Dlgap2       | Rattus norvegicus discs, large (Drosophila) homolog-associated protein 2 (Dlgap2), mRNA [NM_053901]                                          | <b>18,351</b> |
| 0            | Unknown                                                                                                                                      | <b>18,348</b> |
| Ppp2r5c      | Rattus norvegicus protein phosphatase 2, regulatory subunit B', gamma isoform (Ppp2r5c), mRNA [NM_001191112]                                 | <b>18,341</b> |
| Sbk1         | Rattus norvegicus SH3-binding domain kinase 1 (Sbk1), mRNA [NM_147135]                                                                       | <b>18,331</b> |
| 0            | Unknown                                                                                                                                      | <b>18,324</b> |
| 0            | Unknown                                                                                                                                      | <b>18,323</b> |
| LOC100366216 | PREDICTED: Rattus norvegicus nuclear antigen Sp100-like (LOC100366216), mRNA [XM_002727237]                                                  | <b>18,320</b> |
| Gstz1        | Rattus norvegicus glutathione transferase zeta 1 (Gstz1), mRNA [NM_001109445]                                                                | <b>18,319</b> |

|            |                                                                                                                                                                                              |               |
|------------|----------------------------------------------------------------------------------------------------------------------------------------------------------------------------------------------|---------------|
| 0          | Unknown                                                                                                                                                                                      | <b>18,315</b> |
| Ermap      | PREDICTED: Rattus norvegicus erythroblast membrane-associated protein (Ermap), mRNA [XM_001073566]                                                                                           | <b>18,313</b> |
| 0          | SOCS7_HUMAN (O14512) Suppressor of cytokine signaling 7 (SOCS-7) (Nck, Ash and phospholipase C gamma-binding protein) (Nck-associated protein 4) (NAP-4) (Fragment), partial (5%) [TC628777] | <b>18,312</b> |
| Lpo        | Rattus norvegicus lactoperoxidase (Lpo), mRNA [NM_001105829]                                                                                                                                 | <b>18,312</b> |
| Sdhaf2     | Rattus norvegicus succinate dehydrogenase complex assembly factor 2 (Sdhaf2), nuclear gene encoding mitochondrial protein, mRNA [NM_001008371]                                               | <b>18,311</b> |
| Rbm25      | Rattus norvegicus RNA binding motif protein 25 (Rbm25), mRNA [NM_001108984]                                                                                                                  | <b>18,309</b> |
| LOC688319  | PREDICTED: Rattus norvegicus similar to RAS-related C3 botulinum substrate 3 (LOC688319), mRNA [XM_001081814]                                                                                | <b>18,306</b> |
| Ulk3       | PREDICTED: Rattus norvegicus unc-51-like kinase 3 (C. elegans) (Ulk3), mRNA [XM_001077085]                                                                                                   | <b>18,302</b> |
| Pfas       | Rattus norvegicus phosphoribosylformylglycinamide synthase (Pfas), mRNA [NM_001105791]                                                                                                       | <b>18,302</b> |
| RGD1309313 | Rattus norvegicus similar to RIKEN cDNA 4930538D17 (RGD1309313), mRNA [NM_001014030]                                                                                                         | <b>18,302</b> |
| Olr23      | Rattus norvegicus olfactory receptor 23 (Olr23), mRNA [NM_001000119]                                                                                                                         | <b>18,299</b> |
| 0          | Uncharacterized protein [Source:UniProtKB/TrEMBL;Acc:D3Z839] [ENSRNOT00000043647]                                                                                                            | <b>18,298</b> |
| 0          | Unknown                                                                                                                                                                                      | <b>18,298</b> |
| Gpsm1      | Rattus norvegicus G-protein signaling modulator 1 (AGS3-like, C. elegans) (Gpsm1), transcript variant 1, mRNA [NM_144745]                                                                    | <b>18,296</b> |
| Mgat5      | Rattus norvegicus mannosyl (alpha-1,6-)-glycoprotein beta-1,6-N-acetyl-glucosaminyltransferase (Mgat5), mRNA [NM_023095]                                                                     | <b>18,295</b> |
| RGD1564927 | Rattus norvegicus similar to TGFB-induced factor 2 (RGD1564927), mRNA [NM_001134983]                                                                                                         | <b>18,292</b> |
| Olr168     | Rattus norvegicus olfactory receptor 168 (Olr168), mRNA [NM_001000174]                                                                                                                       | <b>18,279</b> |
| Kirrel     | Rattus norvegicus kin of IRRE like (Drosophila) (Kirrel), mRNA [NM_207606]                                                                                                                   | <b>18,278</b> |
| Hic2       | Rattus norvegicus hypermethylated in cancer 2 (Hic2), mRNA [NM_001105862]                                                                                                                    | <b>18,275</b> |
| Plcd4      | Rattus norvegicus phospholipase C, delta 4 (Plcd4), mRNA [NM_080688]                                                                                                                         | <b>18,272</b> |
| Nrxn3      | Rattus norvegicus neurexin 3 (Nrxn3), mRNA [NM_053817]                                                                                                                                       | <b>18,270</b> |
| LOC689065  | Rattus norvegicus hypothetical protein LOC689065 (LOC689065), mRNA [NM_001109521]                                                                                                            | <b>18,269</b> |
| Rufy3      | Rattus norvegicus RUN and FYVE domain containing 3 (Rufy3), mRNA [NM_001025127]                                                                                                              | <b>18,263</b> |
| 0          | Suppressor of Ty 5 homolog (S. cerevisiae), isoform CRA_aUncharacterized protein [Source:UniProtKB/TrEMBL;Acc:D3ZSS2] [ENSRNOT00000048905]                                                   | <b>18,259</b> |
| Zfp143     | Rattus norvegicus zinc finger protein 143 (Zfp143), mRNA [NM_001012169]                                                                                                                      | <b>18,258</b> |
| Cherp      | Rattus norvegicus calcium homeostasis endoplasmic reticulum protein (Cherp), mRNA [NM_001106064]                                                                                             | <b>18,254</b> |
| 0          | Uncharacterized protein [Source:UniProtKB/TrEMBL;Acc:D3ZU97] [ENSRNOT00000059797]                                                                                                            | <b>18,240</b> |
| Atf6       | Rattus norvegicus activating transcription factor 6 (Atf6), mRNA [NM_001107196]                                                                                                              | <b>18,237</b> |
| Sort1      | Rattus norvegicus sortilin 1 (Sort1), mRNA [NM_031767]                                                                                                                                       | <b>18,236</b> |
| 0          | HSN2_RAT (Q6IFS7) Protein HSN2 precursor, complete [TC618038]                                                                                                                                | <b>18,234</b> |
| 0          | Uncharacterized protein [Source:UniProtKB/TrEMBL;Acc:D3Z9J4] [ENSRNOT00000013418]                                                                                                            | <b>18,233</b> |

|            |                                                                                                                                                                                                                                                                 |        |
|------------|-----------------------------------------------------------------------------------------------------------------------------------------------------------------------------------------------------------------------------------------------------------------|--------|
| Plekhn1    | Rattus norvegicus pleckstrin homology domain containing, family N member 1 (Plekhn1), mRNA [NM_001134523]                                                                                                                                                       | 18,225 |
| Cadm3      | Rattus norvegicus cell adhesion molecule 3 (Cadm3), mRNA [NM_001047103]                                                                                                                                                                                         | 18,220 |
| Dda1       | Rattus norvegicus DET1 and DDB1 associated 1 (Dda1), mRNA [NM_001134790]                                                                                                                                                                                        | 18,220 |
| Zkscan2    | Uncharacterized protein [Source:UniProtKB/TrEMBL;Acc:D3ZXU0] [ENSRNOT00000020281]                                                                                                                                                                               | 18,218 |
| Rmnd1      | Rattus norvegicus required for meiotic nuclear division 1 homolog (S. cerevisiae) (Rmnd1), mRNA [NM_001040128]                                                                                                                                                  | 18,210 |
| Crispld2   | Rattus norvegicus cysteine-rich secretory protein LCCL domain containing 2 (Crispld2), mRNA [NM_138518]                                                                                                                                                         | 18,205 |
| 0          | 1PNS_B Chain B, Crystal Structure Of A Streptomycin Dependent Ribosome From E. Coli, 30s Subunit Of 70s Ribosome. This File, 1pns, Contains The 30s Subunit, Two Trnas, And One Mrna Molecule. The 50s Ribosomal Subunit Is In File 1pnu. {Escherichia coli} (e | 18,200 |
| 0          | Uncharacterized protein [Source:UniProtKB/TrEMBL;Acc:D4A3Y5] [ENSRNOT00000057785]                                                                                                                                                                               | 18,198 |
| 0          | Uncharacterized protein [Source:UniProtKB/TrEMBL;Acc:D3ZIV5] [ENSRNOT00000049602]                                                                                                                                                                               | 18,195 |
| 0          | Unknown                                                                                                                                                                                                                                                         | 18,194 |
| LOC363326  | Rattus norvegicus hypothetical LOC363326 (LOC363326), mRNA [NM_001126289]                                                                                                                                                                                       | 18,194 |
| Parp14     | Rattus norvegicus poly (ADP-ribose) polymerase family, member 14 (Parp14), mRNA [NM_001191659]                                                                                                                                                                  | 18,192 |
| Slc4a4     | Rattus norvegicus solute carrier family 4, sodium bicarbonate cotransporter, member 4 (Slc4a4), mRNA [NM_053424]                                                                                                                                                | 18,187 |
| Tmem97     | Rattus norvegicus transmembrane protein 97 (Tmem97), mRNA [NM_001008334]                                                                                                                                                                                        | 18,184 |
| Meaf6      | Rattus norvegicus MYST/Esa1-associated factor 6 (Meaf6), mRNA [NM_001113784]                                                                                                                                                                                    | 18,182 |
| LOC685608  | PREDICTED: Rattus norvegicus hypothetical protein LOC685608 (LOC685608), mRNA [XM_001065355]                                                                                                                                                                    | 18,182 |
| Fam162a    | Rattus norvegicus family with sequence similarity 162, member A (Fam162a), mRNA [NM_001029903]                                                                                                                                                                  | 18,182 |
| Fat4       | Rattus norvegicus FAT tumor suppressor homolog 4 (Drosophila) (Fat4), mRNA [NM_001191705]                                                                                                                                                                       | 18,173 |
| Ephb2      | Rattus norvegicus Eph receptor B2 (Ephb2), mRNA [NM_001127319]                                                                                                                                                                                                  | 18,173 |
| Mobk11b    | Rattus norvegicus MOB1, Mps One Binder kinase activator-like 1B (yeast) (Mobk11b), mRNA [NM_001033891]                                                                                                                                                          | 18,165 |
| Fam122a    | Rattus norvegicus family with sequence similarity 122A (Fam122a), mRNA [NM_001014029]                                                                                                                                                                           | 18,164 |
| Clip2      | Rattus norvegicus CAP-GLY domain containing linker protein 2 (Clip2), mRNA [NM_021997]                                                                                                                                                                          | 18,163 |
| Chn2       | Rattus norvegicus chimerin (chimaerin) 2 (Chn2), mRNA [NM_032084]                                                                                                                                                                                               | 18,160 |
| 0          | Transient receptor potential cation channel subfamily M member 7 [Source:UniProtKB/Swiss-Prot;Acc:Q925B3] [ENSRNOT00000048818]                                                                                                                                  | 18,160 |
| Eif2s3x    | Rattus norvegicus eukaryotic translation initiation factor 2, subunit 3, structural gene X-linked (Eif2s3x), mRNA [NM_001100542]                                                                                                                                | 18,159 |
| Ptges3     | Rattus norvegicus prostaglandin E synthase 3 (cytosolic) (Ptges3), mRNA [NM_001130989]                                                                                                                                                                          | 18,152 |
| 0          | Uncharacterized protein [Source:UniProtKB/TrEMBL;Acc:D4A7M0] [ENSRNOT00000011178]                                                                                                                                                                               | 18,146 |
| Rgr        | Rattus norvegicus retinal G protein coupled receptor (Rgr), mRNA [NM_001107299]                                                                                                                                                                                 | 18,144 |
| Apaf1      | Rattus norvegicus apoptotic peptidase activating factor 1 (Apaf1), mRNA [NM_023979]                                                                                                                                                                             | 18,142 |
| 0          | Unknown                                                                                                                                                                                                                                                         | 18,141 |
| Glg1       | Rattus norvegicus golgi apparatus protein 1 (Glg1), mRNA [NM_017211]                                                                                                                                                                                            | 18,139 |
| RGD1308134 | Rattus norvegicus similar to RIKEN cDNA 1110020A23 (RGD1308134), mRNA [NM_001127521]                                                                                                                                                                            | 18,137 |
| Ndor1      | Rattus norvegicus NADPH dependent diflavin oxidoreductase 1 (Ndor1), mRNA [NM_001107818]                                                                                                                                                                        | 18,127 |

|            |                                                                                                                                        |               |
|------------|----------------------------------------------------------------------------------------------------------------------------------------|---------------|
| Lrrc4b     | Leucine-rich repeat-containing protein 4B [Source:UniProtKB/Swiss-Prot;Acc:P0CC10] [ENSRNOT00000026259]                                | <b>18,126</b> |
| 0          | Unknown                                                                                                                                | <b>18,123</b> |
| 0          | Unknown                                                                                                                                | <b>18,123</b> |
| RGD1308026 | Rattus norvegicus similar to 2310047B19Rik protein (RGD1308026), mRNA [NM_001108755]                                                   | <b>18,122</b> |
| Rhbdl1     | Rattus norvegicus rhomboid, veinlet-like 1 (Drosophila) (Rhbdl1), mRNA [NM_001191822]                                                  | <b>18,122</b> |
| Slc6a2     | Rattus norvegicus solute carrier family 6 (neurotransmitter transporter, noradrenalin), member 2 (Slc6a2), mRNA [NM_031343]            | <b>18,121</b> |
| Polr2f     | DNA-directed RNA polymerases I, II, and III subunit RPABC2 [Source:UniProtKB/Swiss-Prot;Acc:O88828] [ENSRNOT00000015009]               | <b>18,119</b> |
| Gse1       | PREDICTED: Rattus norvegicus genetic suppressor element 1 (Gse1), mRNA [XM_001078877]                                                  | <b>18,119</b> |
| Znf474     | Rattus norvegicus zinc finger protein 474 (Znf474), mRNA [NM_001107380]                                                                | <b>18,113</b> |
| Pcdhga5    | Rattus norvegicus protocadherin gamma subfamily A, 5 (Pcdhga5), mRNA [NM_001037137]                                                    | <b>18,110</b> |
| Pygb       | Rattus norvegicus phosphorylase, glycogen; brain (Pygb), mRNA [NM_013188]                                                              | <b>18,108</b> |
| Tacc1      | Rattus norvegicus transforming, acidic coiled-coil containing protein 1 (Tacc1), mRNA [NM_001004107]                                   | <b>18,108</b> |
| Hmg20a     | Rattus norvegicus high mobility group 20A (Hmg20a), mRNA [NM_001108150]                                                                | <b>18,108</b> |
| 0          | Unknown                                                                                                                                | <b>18,104</b> |
| Noxa1      | Rattus norvegicus NADPH oxidase activator 1 (Noxa1), mRNA [NM_001100171]                                                               | <b>18,103</b> |
| Rab5c      | Rattus norvegicus RAB5C, member RAS oncogene family (Rab5c), mRNA [NM_001105840]                                                       | <b>18,102</b> |
| Ints9      | PREDICTED: Rattus norvegicus integrator complex subunit 9 (Ints9), mRNA [XM_001066109]                                                 | <b>18,101</b> |
| Commd10    | Rattus norvegicus COMM domain containing 10 (Commd10), mRNA [NM_001004276]                                                             | <b>18,101</b> |
| Atp11b     | Atp11b protein [Source:UniProtKB/TrEMBL;Acc:Q5RJS7] [ENSRNOT00000016961]                                                               | <b>18,099</b> |
| Pdha1      | Rattus norvegicus pyruvate dehydrogenase (lipoamide) alpha 1 (Pdha1), nuclear gene encoding mitochondrial protein, mRNA [NM_001004072] | <b>18,099</b> |
| Polr2e     | Rattus norvegicus polymerase (RNA) II (DNA directed) polypeptide E (Polr2e), mRNA [NM_001109614]                                       | <b>18,094</b> |
| Kcnk1      | Rattus norvegicus potassium channel, subfamily K, member 1 (Kcnk1), mRNA [NM_021688]                                                   | <b>18,093</b> |
| Ngb        | Rattus norvegicus neuroglobin (Ngb), mRNA [NM_033359]                                                                                  | <b>18,093</b> |
| Efr3a      | Rattus norvegicus EFR3 homolog A ( <i>S. cerevisiae</i> ) (Efr3a), mRNA [NM_001130564]                                                 | <b>18,087</b> |
| Apod       | Rattus norvegicus apolipoprotein D (Apod), mRNA [NM_012777]                                                                            | <b>18,085</b> |
| 0          | Unknown                                                                                                                                | <b>18,084</b> |
| Dhrs3      | Rattus norvegicus dehydrogenase/reductase (SDR family) member 3 (Dhrs3), mRNA [NM_001037199]                                           | <b>18,084</b> |
| Plekhg5    | Rattus norvegicus pleckstrin homology domain containing, family G (with RhoGef domain) member 5 (Plekhg5), mRNA [NM_201272]            | <b>18,081</b> |
| Syt3       | Rattus norvegicus synaptotagmin III (Syt3), mRNA [NM_019122]                                                                           | <b>18,080</b> |
| Entpd6     | Rattus norvegicus ectonucleoside triphosphate diphosphohydrolase 6 (Entpd6), mRNA [NM_053498]                                          | <b>18,079</b> |
| Crbn       | Rattus norvegicus cereblon (Crbn), mRNA [NM_001015003]                                                                                 | <b>18,077</b> |
| Znf286a    | Rattus norvegicus zinc finger protein 286A (Znf286a), mRNA [NM_001191921]                                                              | <b>18,077</b> |
| Ppargc1b   | Rattus norvegicus peroxisome proliferator-activated receptor gamma, coactivator 1 beta (Ppargc1b), mRNA [NM_176075]                    | <b>18,074</b> |
| 0          | Unknown                                                                                                                                | <b>18,074</b> |

|              |                                                                                                                                                   |        |
|--------------|---------------------------------------------------------------------------------------------------------------------------------------------------|--------|
| B3galt5      | Rattus norvegicus UDP-Gal:betaGlcNAc beta 1,3-galactosyltransferase, polypeptide 5 (B3galt5), mRNA [NM_001105887]                                 | 18,074 |
| 0            | Unknown                                                                                                                                           | 18,072 |
| Cln3         | Rattus norvegicus ceroid-lipofuscinosis, neuronal 3 (Cln3), mRNA [NM_001006971]                                                                   | 18,067 |
| Emilin1      | Rattus norvegicus elastin microfibril interfacer 1 (Emilin1), mRNA [NM_001106710]                                                                 | 18,067 |
| Map2k4       | Rattus norvegicus mitogen activated protein kinase kinase 4 (Map2k4), mRNA [NM_001030023]                                                         | 18,066 |
| Ptpn3        | Ptpn3 protein [Source:UniProtKB/TrEMBL;Acc:Q562B7] [ENSRNOT00000059627]                                                                           | 18,066 |
| Chaf1b       | Rattus norvegicus chromatin assembly factor 1, subunit B (p60) (Chaf1b), mRNA [NM_001024741]                                                      | 18,064 |
| LOC691777    | PREDICTED: Rattus norvegicus hypothetical protein LOC691777 (LOC691777), mRNA [XM_002724616]                                                      | 18,063 |
| Pigq         | Rattus norvegicus phosphatidylinositol glycan anchor biosynthesis, class Q (Pigq), mRNA [NM_001007607]                                            | 18,061 |
| Urb2         | Rattus norvegicus URB2 ribosome biogenesis 2 homolog (S. cerevisiae) (Urb2), mRNA [NM_001135708]                                                  | 18,057 |
| 0            | Unknown                                                                                                                                           | 18,055 |
| Pqlc3        | Rattus norvegicus PQ loop repeat containing 3 (Pqlc3), mRNA [NM_001034952]                                                                        | 18,053 |
| Sema3c       | Rattus norvegicus sema domain, immunoglobulin domain (Ig), short basic domain, secreted, (semaphorin) 3C (Sema3c), mRNA [NM_001106578]            | 18,052 |
| Foxg1        | Rattus norvegicus forkhead box G1 (Foxg1), mRNA [NM_012560]                                                                                       | 18,051 |
| Sox12        | Rattus norvegicus SRY (sex determining region Y)-box 12 (Sox12), mRNA [NM_001168650]                                                              | 18,045 |
| Sigmar1      | Rattus norvegicus sigma non-opioid intracellular receptor 1 (Sigmar1), mRNA [NM_030996]                                                           | 18,038 |
| Chmp1b       | Rattus norvegicus chromatin modifying protein 1B (Chmp1b), mRNA [NM_001109533]                                                                    | 18,029 |
| Mef2a        | Rattus norvegicus myocyte enhancer factor 2a (Mef2a), mRNA [NM_001014035]                                                                         | 18,029 |
| 0            | AF440762 septin SEPT8_v2 {Homo sapiens} (exp=-1; wgp=0; cg=0), partial (97%) [TC612969]                                                           | 18,027 |
| B4galt6      | Rattus norvegicus UDP-Gal:betaGlcNAc beta 1,4-galactosyltransferase, polypeptide 6 (B4galt6), mRNA [NM_031740]                                    | 18,022 |
| Garnl1       | Rattus norvegicus GTPase activating Rap/RanGAP domain-like 1 (Garnl1), mRNA [NM_020083]                                                           | 18,017 |
| Oxa1l        | Rattus norvegicus oxidase assembly 1-like (Oxa1l), mRNA [NM_001168583]                                                                            | 18,014 |
| Stap2        | Rattus norvegicus signal transducing adaptor family member 2 (Stap2), mRNA [NM_001025026]                                                         | 18,010 |
| Tmem119      | Rattus norvegicus transmembrane protein 119 (Tmem119), mRNA [NM_001107155]                                                                        | 18,005 |
| 0            | Unknown                                                                                                                                           | 18,005 |
| LOC100363290 | PREDICTED: Rattus norvegicus hypothetical protein LOC100363290 (LOC100363290), mRNA [XM_002728135]                                                | 18,004 |
| Ano1         | Rattus norvegicus anoctamin 1, calcium activated chloride channel (Ano1), mRNA [NM_001107564]                                                     | 18,001 |
| Ntrk2        | Rattus norvegicus neurotrophic tyrosine kinase, receptor, type 2 (Ntrk2), transcript variant 3, mRNA [NM_001163169]                               | 17,998 |
| 0            | Rattus norvegicus similar to RIKEN cDNA 1810009A15 (LOC293720), mRNA [XM_215148]                                                                  | 17,993 |
| Snx9         | Rattus norvegicus sorting nexin 9 (Snx9), mRNA [NM_001127637]                                                                                     | 17,990 |
| Serpina4     | Rattus norvegicus serine (or cysteine) proteinase inhibitor, clade A (alpha-1 antiproteinase, antitrypsin), member 4 (Serpina4), mRNA [NM_145097] | 17,990 |
| Kcnh1        | Rattus norvegicus potassium voltage-gated channel, subfamily H (eag-related), member 1 (Kcnh1), mRNA [NM_031742]                                  | 17,989 |
| Tmem88b      | Rattus norvegicus transmembrane protein 88B (Tmem88b), mRNA [NM_001109426]                                                                        | 17,989 |
| RGD1308106   | Rattus norvegicus LOC361719 (RGD1308106), mRNA [NM_001134575]                                                                                     | 17,989 |

|            |                                                                                                                                                                                |        |
|------------|--------------------------------------------------------------------------------------------------------------------------------------------------------------------------------|--------|
| Abhd6      | Rattus norvegicus abhydrolase domain containing 6 (Abhd6), mRNA [NM_001007680]                                                                                                 | 17,986 |
| Plekhf2    | Rattus norvegicus pleckstrin homology domain containing, family F (with FYVE domain) member 2 (Plekhf2), mRNA [NM_001108655]                                                   | 17,972 |
| Vcam1      | Rattus norvegicus vascular cell adhesion molecule 1 (Vcam1), mRNA [NM_012889]                                                                                                  | 17,966 |
| Pbx4       | Rattus norvegicus pre-B-cell leukemia homeobox 4 (Pbx4), mRNA [NM_001108399]                                                                                                   | 17,965 |
| RGD1563216 | Rattus norvegicus similar to HESB like domain containing 1 (RGD1563216), mRNA [NM_001109278]                                                                                   | 17,964 |
| Aldoc      | Rattus norvegicus aldolase C, fructose-bisphosphate (Aldoc), mRNA [NM_012497]                                                                                                  | 17,960 |
| 0          | Uncharacterized protein [Source:UniProtKB/TrEMBL;Acc:D3ZN05] [ENSRNOT00000052028]                                                                                              | 17,954 |
| Gm52       | Rattus norvegicus envelope glycoprotein syncytin-A (Gm52), mRNA [NM_001014771]                                                                                                 | 17,952 |
| Cops7b     | Rattus norvegicus COP9 constitutive photomorphogenic homolog subunit 7B (Arabidopsis) (Cops7b), mRNA [NM_001108807]                                                            | 17,945 |
| RGD1563108 | PREDICTED: Rattus norvegicus similar to chromosome 21 open reading frame 29 (RGD1563108), mRNA [XM_001079415]                                                                  | 17,938 |
| 0          | Uncharacterized protein [Source:UniProtKB/TrEMBL;Acc:D3ZMP1] [ENSRNOT00000044539]                                                                                              | 17,931 |
| 0          | Unknown                                                                                                                                                                        | 17,931 |
| Ankrd13c   | Rattus norvegicus ankyrin repeat domain 13C (Ankrd13c), mRNA [NM_001191570]                                                                                                    | 17,928 |
| Vps37c     | Rattus norvegicus vacuolar protein sorting 37 homolog C (S. cerevisiae) (Vps37c), mRNA [NM_001107463]                                                                          | 17,926 |
| 0          | Rattus norvegicus partial mRNA for immunoglobulin alpha heavy chain (partial), complete constant region. [AJ510151]                                                            | 17,926 |
| 0          | Unknown                                                                                                                                                                        | 17,921 |
| 0          | RCG43605, isoform CRA_aUncharacterized protein [Source:UniProtKB/TrEMBL;Acc:D3ZHC7] [ENSRNOT00000061670]                                                                       | 17,919 |
| Zfp455     | Rattus norvegicus zinc finger protein 455 (Zfp455), mRNA [NM_173314]                                                                                                           | 17,918 |
| Shc1       | Rattus norvegicus SHC (Src homology 2 domain containing) transforming protein 1 (Shc1), nuclear gene encoding mitochondrial protein, transcript variant 1, mRNA [NM_001164060] | 17,917 |
| Mfge8      | Rattus norvegicus milk fat globule-EGF factor 8 protein (Mfge8), transcript variant 2, mRNA [NM_012811]                                                                        | 17,909 |
| Vegfa      | Rattus norvegicus vascular endothelial growth factor A (Vegfa), transcript variant 1, mRNA [NM_031836]                                                                         | 17,909 |
| Pum2       | Rattus norvegicus pumilio homolog 2 (Drosophila) (Pum2), mRNA [NM_001106715]                                                                                                   | 17,906 |
| ErbB4      | Rattus norvegicus v-erb-a erythroblastic leukemia viral oncogene homolog 4 (avian) (ErbB4), mRNA [NM_021687]                                                                   | 17,906 |
| Nek4       | Rattus norvegicus NIMA (never in mitosis gene a)-related kinase 4 (Nek4), mRNA [NM_001013134]                                                                                  | 17,899 |
| Ldb2       | Rattus norvegicus LIM domain binding 2 (Ldb2), mRNA [NM_001106009]                                                                                                             | 17,898 |
| Gfra1      | Rattus norvegicus GDNF family receptor alpha 1 (Gfra1), mRNA [NM_012959]                                                                                                       | 17,894 |
| Zfp212     | Zfp212 protein [Source:UniProtKB/TrEMBL;Acc:Q52KK5] [ENSRNOT00000009054]                                                                                                       | 17,885 |
| Slc25a44   | Rattus norvegicus solute carrier family 25, member 44 (Slc25a44), mRNA [NM_001108947]                                                                                          | 17,884 |
| 0          | Unknown                                                                                                                                                                        | 17,884 |
| Klf3       | Rattus norvegicus Kruppel-like factor 3 (basic) (Klf3), mRNA [NM_001105742]                                                                                                    | 17,879 |
| Prpg1      | Rattus norvegicus proline-rich proteoglycan 1 (Prpg1), mRNA [NM_172064]                                                                                                        | 17,870 |
| Xiap       | Rattus norvegicus X-linked inhibitor of apoptosis (Xiap), mRNA [NM_022231]                                                                                                     | 17,866 |
| Supt16h    | Rattus norvegicus suppressor of Ty 16 homolog (S. cerevisiae) (Supt16h), mRNA [NM_001107261]                                                                                   | 17,860 |

|            |                                                                                                                                    |        |
|------------|------------------------------------------------------------------------------------------------------------------------------------|--------|
| Rspo2      | Rattus norvegicus R-spondin 2 homolog (Xenopus laevis) (Rspo2), mRNA [NM_001130575]                                                | 17,859 |
| 0          | RVL11956 Wackym-Soares normalized rat vestibular cDNA library Rattus norvegicus cDNA 5', mRNA sequence [DV720880]                  | 17,852 |
| Cpeb4      | Rattus norvegicus cytoplasmic polyadenylation element binding protein 4 (Cpeb4), mRNA [NM_001106992]                               | 17,851 |
| LOC685953  | Platelet glycoprotein 4 [Source:UniProtKB/Swiss-Prot;Acc:Q07969] [ENSRNOT00000066224]                                              | 17,845 |
| 0          | HSU97670 eukaryotic translation initiation factor eIF3, p35 subunit {Homo sapiens} (exp=-1; wgp=0; cg=0), partial (26%) [TC586860] | 17,845 |
| Pom121     | Rattus norvegicus nuclear pore membrane protein 121 (Pom121), mRNA [NM_053622]                                                     | 17,839 |
| Sgpl1      | Rattus norvegicus sphingosine-1-phosphate lyase 1 (Sgpl1), mRNA [NM_173116]                                                        | 17,833 |
| Tmem143    | Rattus norvegicus transmembrane protein 143 (Tmem143), mRNA [NM_001107513]                                                         | 17,827 |
| Ap1s2      | Rattus norvegicus adaptor-related protein complex 1, sigma 2 subunit (Ap1s2), mRNA [NM_001127531]                                  | 17,827 |
| Jak1       | Rattus norvegicus Janus kinase 1 (Jak1), mRNA [NM_053466]                                                                          | 17,827 |
| 0          | Unknown                                                                                                                            | 17,825 |
| Ahdc1      | Rattus norvegicus AT hook, DNA binding motif, containing 1 (Ahdc1), mRNA [NM_001134956]                                            | 17,821 |
| RGD1307410 | RGD1307410 protein [Source:UniProtKB/TrEMBL;Acc:Q5EB78] [ENSRNOT00000054978]                                                       | 17,817 |
| Acvr1      | Rattus norvegicus activin A receptor, type I (Acvr1), mRNA [NM_024486]                                                             | 17,812 |
| Znfx1      | Rattus norvegicus zinc finger, NFX1-type containing 1 (Znfx1), mRNA [NM_001047860]                                                 | 17,805 |
| Lmna       | Rattus norvegicus lamin A (Lmna), transcript variant 2, mRNA [NM_001002016]                                                        | 17,805 |
| Gzf1       | Rattus norvegicus GDNF-inducible zinc finger protein 1 (Gzf1), mRNA [NM_001107788]                                                 | 17,803 |
| Ppig       | Rattus norvegicus peptidylprolyl isomerase G (Ppig), mRNA [NM_031793]                                                              | 17,801 |
| LOC681186  | PREDICTED: Rattus norvegicus hypothetical protein LOC681186 (LOC681186), mRNA [XM_001060674]                                       | 17,800 |
| RGD1309104 | Rattus norvegicus similar to RIKEN cDNA 1700025G04 gene (RGD1309104), mRNA [NM_001105959]                                          | 17,799 |
| 0          | Myristoylated alanine-rich C-kinase substrate [Source:UniProtKB/Swiss-Prot;Acc:P30009] [ENSRNOT00000000707]                        | 17,791 |
| 0          | Rattus norvegicus similar to Pyruvate kinase, M2 isozyme (LOC301604), mRNA [XM_237391]                                             | 17,789 |
| 0          | Unknown                                                                                                                            | 17,788 |
| Hist2h2be  | Histone H2B [Source:UniProtKB/TrEMBL;Acc:D3ZZP9] [ENSRNOT00000028770]                                                              | 17,778 |
| Cby1       | Rattus norvegicus chibby homolog 1 (Drosophila) (Cby1), mRNA [NM_145676]                                                           | 17,773 |
| Syt11      | Rattus norvegicus synaptotagmin XI (Syt11), mRNA [NM_031667]                                                                       | 17,770 |
| Tmem25     | Rattus norvegicus transmembrane protein 25 (Tmem25), mRNA [NM_001109528]                                                           | 17,767 |
| Ambra1     | Rattus norvegicus autophagy/beclin 1 regulator 1 (Ambra1), mRNA [NM_001134341]                                                     | 17,765 |
| Rnf182     | Rattus norvegicus ring finger protein 182 (Rnf182), mRNA [NM_001109117]                                                            | 17,759 |
| 0          | PREDICTED: Rattus norvegicus similar to deleted in malignant brain tumors 1 isoform a precursor (LOC678825), mRNA [XM_001053354]   | 17,758 |
| Leng4      | Rattus norvegicus leukocyte receptor cluster (LRC) member 4 (Leng4), mRNA [NM_001134978]                                           | 17,756 |
| 0          | Unknown                                                                                                                            | 17,755 |
| Jsrp1      | Rattus norvegicus junctional sarcoplasmic reticulum protein 1 (Jsrp1), mRNA [NM_001109591]                                         | 17,755 |
| Suhw3      | Uncharacterized protein [Source:UniProtKB/TrEMBL;Acc:D3ZCC6] [ENSRNOT00000044435]                                                  | 17,754 |

|            |                                                                                                                                        |        |
|------------|----------------------------------------------------------------------------------------------------------------------------------------|--------|
| Rnd2       | Rattus norvegicus Rho family GTPase 2 (Rnd2), mRNA [NM_001010953]                                                                      | 17,752 |
| Klhl23     | Rattus norvegicus kelch-like 23 (Drosophila) (Klhl23), mRNA [NM_001134504]                                                             | 17,751 |
| Adora1     | Adenosine receptor A1 [Source:UniProtKB/Swiss-Prot;Acc:P25099] [ENSRNOT00000004602]                                                    | 17,750 |
| 0          | Rattus norvegicus TL0ADA38YF09 mRNA sequence. [FQ221288]                                                                               | 17,750 |
| Igsf9b     | Uncharacterized protein [Source:UniProtKB/TrEMBL;Acc:D3ZB51] [ENSRNOT00000012391]                                                      | 17,750 |
| 0          | Uncharacterized protein [Source:UniProtKB/TrEMBL;Acc:D4A1Q6] [ENSRNOT00000056074]                                                      | 17,750 |
| 0          | Unknown                                                                                                                                | 17,748 |
| 0          | Unknown                                                                                                                                | 17,736 |
| N4bp2l1    | Rattus norvegicus NEDD4 binding protein 2-like 1 (N4bp2l1), mRNA [NM_001035222]                                                        | 17,729 |
| 0          | Unknown                                                                                                                                | 17,725 |
| Ube2a      | Rattus norvegicus ubiquitin-conjugating enzyme E2A (RAD6 homolog) (Ube2a), mRNA [NM_001013933]                                         | 17,723 |
| Vps25      | Rattus norvegicus vacuolar protein sorting 25 homolog (S. cerevisiae) (Vps25), mRNA [NM_001173451]                                     | 17,719 |
| 0          | Unknown                                                                                                                                | 17,718 |
| 0          | PREDICTED: Rattus norvegicus similar to TDPOZ2 (RGD1563451), mRNA [XM_001053863]                                                       | 17,715 |
| LOC680787  | PREDICTED: Rattus norvegicus rCG56785-like (LOC680787), mRNA [XM_002730096]                                                            | 17,714 |
| Ddx41      | Rattus norvegicus DEAD (Asp-Glu-Ala-Asp) box polypeptide 41 (Ddx41), mRNA [NM_001108046]                                               | 17,714 |
| Usp22      | Ubiquitin carboxyl-terminal hydrolase [Source:UniProtKB/TrEMBL;Acc:D3ZTX7] [ENSRNOT00000050061]                                        | 17,708 |
| Senp5      | PREDICTED: Rattus norvegicus Sumo1/sentrin/SMT3 specific peptidase 5 (Senp5), mRNA [XM_221369]                                         | 17,707 |
| RGD1561410 | PREDICTED: Rattus norvegicus similar to sentrin 15 (RGD1559489), mRNA [XM_235207]                                                      | 17,703 |
| Farp1      | Rattus norvegicus FERM, RhoGEF (Arhgef) and pleckstrin domain protein 1 (chondrocyte-derived) (Farp1), mRNA [NM_001107287]             | 17,697 |
| Gpc1       | Rattus norvegicus glypican 1 (Gpc1), mRNA [NM_030828]                                                                                  | 17,696 |
| Adhfe1     | Rattus norvegicus alcohol dehydrogenase, iron containing, 1 (Adhfe1), nuclear gene encoding mitochondrial protein, mRNA [NM_001025423] | 17,691 |
| Dcxr       | Rattus norvegicus dicarbonyl L-xylulose reductase (Dcxr), mRNA [NM_134387]                                                             | 17,690 |
| Slc2a13    | Rattus norvegicus solute carrier family 2 (facilitated glucose transporter), member 13 (Slc2a13), mRNA [NM_133611]                     | 17,690 |
| Gad1       | Rattus norvegicus glutamate decarboxylase 1 (Gad1), mRNA [NM_017007]                                                                   | 17,685 |
| 0          | Uncharacterized protein [Source:UniProtKB/TrEMBL;Acc:D3ZEB9] [ENSRNOT00000066253]                                                      | 17,682 |
| Add3       | Rattus norvegicus adducin 3 (gamma) (Add3), transcript variant 1, mRNA [NM_001164103]                                                  | 17,669 |
| Arhgef9    | Rattus norvegicus Cdc42 guanine nucleotide exchange factor (GEF) 9 (Arhgef9), mRNA [NM_023957]                                         | 17,667 |
| 0          | Unknown                                                                                                                                | 17,664 |
| Slmo1      | Rattus norvegicus slowmo homolog 1 (Drosophila) (Slmo1), mRNA [NM_001109570]                                                           | 17,661 |
| Trappc9    | Rattus norvegicus trafficking protein particle complex 9 (Trappc9), mRNA [NM_001034156]                                                | 17,660 |
| Shc3       | Rattus norvegicus SHC (Src homology 2 domain containing) transforming protein 3 (Shc3), mRNA [NM_001105743]                            | 17,660 |
| 0          | beta 1,3-galactosyltransferase-like Gene [Source:MGI Symbol;Acc:MGI:2685903] [ENSRNOT00000001199]                                      | 17,655 |
| Phldb1     | Rattus norvegicus pleckstrin homology-like domain, family B, member 1 (Phldb1), mRNA [NM_001191578]                                    | 17,650 |



|            |                                                                                                                                                                               |               |
|------------|-------------------------------------------------------------------------------------------------------------------------------------------------------------------------------|---------------|
| Slc25a24   | Rattus norvegicus solute carrier family 25 (mitochondrial carrier, phosphate carrier), member 24 (Slc25a24), nuclear gene encoding mitochondrial protein, mRNA [NM_001127544] | <b>17,634</b> |
| Adcy5      | Rattus norvegicus adenylate cyclase 5 (Adcy5), mRNA [NM_022600]                                                                                                               | <b>17,632</b> |
| Pcdh11x    | Uncharacterized protein [Source:UniProtKB/TrEMBL;Acc:D4A497] [ENSRNOT00000045001]                                                                                             | <b>17,631</b> |
| Fam175b    | Rattus norvegicus family with sequence similarity 175, member B (Fam175b), mRNA [NM_001106307]                                                                                | <b>17,629</b> |
| Chtf8      | Rattus norvegicus CTF8, chromosome transmission fidelity factor 8 homolog (S. cerevisiae) (Chtf8), mRNA [NM_001194951]                                                        | <b>17,628</b> |
| 0          | Unknown                                                                                                                                                                       | <b>17,628</b> |
| Zfp238     | Rattus norvegicus zinc finger protein 238 (Zfp238), mRNA [NM_022678]                                                                                                          | <b>17,622</b> |
| Ttc4       | Rattus norvegicus tetratricopeptide repeat domain 4 (Ttc4), mRNA [NM_001013214]                                                                                               | <b>17,621</b> |
| Tubg2      | Rattus norvegicus tubulin, gamma 2 (Tubg2), mRNA [NM_001191075]                                                                                                               | <b>17,621</b> |
| 0          | Cytochrome c oxidase subunit 2 [Source:UniProtKB/Swiss-Prot;Acc:P00406] [ENSRNOT00000043693]                                                                                  | <b>17,620</b> |
| Gpsm3      | Rattus norvegicus G-protein signaling modulator 3 (AGS3-like, C. elegans) (Gpsm3), mRNA [NM_001003974]                                                                        | <b>17,619</b> |
| LOC688507  | PREDICTED: Rattus norvegicus similar to Spetex-2F protein (LOC688507), mRNA [XM_001067216]                                                                                    | <b>17,615</b> |
| Dctn4      | Dynactin subunit 4 [Source:UniProtKB/Swiss-Prot;Acc:Q9QUR2] [ENSRNOT00000026394]                                                                                              | <b>17,613</b> |
| Hrh3       | Rattus norvegicus histamine receptor H3 (Hrh3), mRNA [NM_053506]                                                                                                              | <b>17,613</b> |
| 0          | Q7TS76_MOUSE (Q7TS76) Sip1 protein, partial (13%) [TC617524]                                                                                                                  | <b>17,611</b> |
| RGD1306520 | Rattus norvegicus similar to receptor-interacting factor 1 (RGD1306520), mRNA [NM_001127485]                                                                                  | <b>17,609</b> |
| Lzic       | Rattus norvegicus leucine zipper and CTNNBIP1 domain containing (Lzic), mRNA [NM_001013241]                                                                                   | <b>17,609</b> |
| 0          | Unknown                                                                                                                                                                       | <b>17,608</b> |
| Htra3      | Uncharacterized protein [Source:UniProtKB/TrEMBL;Acc:D3ZA76] [ENSRNOT00000010852]                                                                                             | <b>17,608</b> |
| Baiap2l1   | Rattus norvegicus BAI1-associated protein 2-like 1 (Baiap2l1), mRNA [NM_001034140]                                                                                            | <b>17,605</b> |
| C7         | PREDICTED: Rattus norvegicus complement component 7 (C7), mRNA [XM_226803]                                                                                                    | <b>17,600</b> |
| Ar         | Rattus norvegicus androgen receptor (Ar), mRNA [NM_012502]                                                                                                                    | <b>17,600</b> |
| Hspb9      | Rattus norvegicus heat shock protein, alpha-crystallin-related, B9 (Hspb9), mRNA [NM_001108835]                                                                               | <b>17,598</b> |
| Map3k9     | PREDICTED: Rattus norvegicus mitogen-activated protein kinase kinase kinase 9 (Map3k9), mRNA [XM_002726763]                                                                   | <b>17,595</b> |
| Dmrtc1b    | PREDICTED: Rattus norvegicus DMRT-like family C1b (Dmrtc1b), mRNA [XM_001055549]                                                                                              | <b>17,595</b> |
| Dclre1a    | Rattus norvegicus DNA cross-link repair 1A, PSO2 homolog (S. cerevisiae) (Dclre1a), mRNA [NM_001106201]                                                                       | <b>17,588</b> |
| Mtch1      | Rattus norvegicus mitochondrial carrier homolog 1 (C. elegans) (Mtch1), nuclear gene encoding mitochondrial protein, mRNA [NM_001100833]                                      | <b>17,587</b> |
| Pldn       | Rattus norvegicus pallidin homolog (mouse) (Pldn), mRNA [NM_001025714]                                                                                                        | <b>17,584</b> |
| LOC683498  | PREDICTED: Rattus norvegicus similar to Actin, aortic smooth muscle (Alpha-actin-2) (LOC683498), mRNA [XM_001066215]                                                          | <b>17,582</b> |
| Tpcn1      | Rattus norvegicus two pore segment channel 1 (Tpcn1), mRNA [NM_139332]                                                                                                        | <b>17,582</b> |
| 0          | Unknown                                                                                                                                                                       | <b>17,579</b> |
| Camta2     | Rattus norvegicus calmodulin binding transcription activator 2 (Camta2), mRNA [NM_001105801]                                                                                  | <b>17,576</b> |
| Pgf        | Rattus norvegicus placental growth factor (Pgf), mRNA [NM_053595]                                                                                                             | <b>17,574</b> |

|            |                                                                                                                                                     |        |
|------------|-----------------------------------------------------------------------------------------------------------------------------------------------------|--------|
| Lin28      | Rattus norvegicus lin-28 homolog (C. elegans) (Lin28), mRNA [NM_001109269]                                                                          | 17,570 |
| Lipn       | Rattus norvegicus lipase, family member N (Lipn), mRNA [NM_001191955]                                                                               | 17,568 |
| Rpl29      | Rattus norvegicus ribosomal protein L29 (Rpl29), mRNA [NM_017150]                                                                                   | 17,565 |
| Grin2b     | Rattus norvegicus glutamate receptor, ionotropic, N-methyl D-aspartate 2B (Grin2b), mRNA [NM_012574]                                                | 17,565 |
| Olr125     | Rattus norvegicus olfactory receptor 125 (Olr125), mRNA [NM_001000740]                                                                              | 17,564 |
| 0          | Uncharacterized protein [Source:UniProtKB/TrEMBL;Acc:D3ZPQ3] [ENSRNOT00000056551]                                                                   | 17,561 |
| Chi3l1     | Rattus norvegicus chitinase 3-like 1 (Chi3l1), mRNA [NM_053560]                                                                                     | 17,558 |
| Olr260     | Rattus norvegicus olfactory receptor 260 (Olr260), mRNA [NM_001000946]                                                                              | 17,555 |
| Eif1ay     | Rattus norvegicus eukaryotic translation initiation factor 1A, Y-linked (Eif1ay), mRNA [NM_001106963]                                               | 17,555 |
| 0          | Unknown                                                                                                                                             | 17,555 |
| Dnajc17    | Rattus norvegicus DnaJ (Hsp40) homolog, subfamily C, member 17 (Dnajc17), mRNA [NM_001191740]                                                       | 17,554 |
| Ptp4a3     | Rattus norvegicus protein tyrosine phosphatase type IVA, member 3 (Ptp4a3), mRNA [NM_001114405]                                                     | 17,554 |
| 0          | SYT1_RAT (P21707) Synaptotagmin-1 (Synaptotagmin I) (Sytl) (p65), complete [TC577208]                                                               | 17,554 |
| Zfand3     | Rattus norvegicus zinc finger, AN1-type domain 3 (Zfand3), mRNA [NM_001012175]                                                                      | 17,551 |
| 0          | Q4QQW4_RAT (Q4QQW4) Histone deacetylase 1, partial (42%) [TC647523]                                                                                 | 17,550 |
| Eif3f      | Rattus norvegicus eukaryotic translation initiation factor 3, subunit F (Eif3f), mRNA [NM_001106292]                                                | 17,547 |
| Gpam       | Rattus norvegicus glycerol-3-phosphate acyltransferase, mitochondrial (Gpam), nuclear gene encoding mitochondrial protein, mRNA [NM_017274]         | 17,544 |
| Rnps1      | Rattus norvegicus ribonucleic acid binding protein S1 (Rnps1), mRNA [NM_001011890]                                                                  | 17,544 |
| Dmrta2     | Rattus norvegicus DMRT-like family A2 (Dmrta2), mRNA [NM_001107951]                                                                                 | 17,538 |
| Hp1bp3     | Rattus norvegicus heterochromatin protein 1, binding protein 3 (Hp1bp3), mRNA [NM_199108]                                                           | 17,537 |
| Rap2a      | RAS related protein 2a [Source:RefSeq peptide;Acc:NP_446193] [ENSRNOT00000032395]                                                                   | 17,536 |
| Olr19      | Rattus norvegicus olfactory receptor 19 (Olr19), mRNA [NM_001000117]                                                                                | 17,535 |
| Tmem229a   | Rattus norvegicus transmembrane protein 229A (Tmem229a), mRNA [NM_001109480]                                                                        | 17,534 |
| Ttc26      | Rattus norvegicus tetratricopeptide repeat domain 26 (Ttc26), mRNA [NM_001025045]                                                                   | 17,532 |
| Slc1a2     | Rattus norvegicus solute carrier family 1 (glial high affinity glutamate transporter), member 2 (Slc1a2), transcript variant 2, mRNA [NM_001035233] | 17,528 |
| 0          | Unknown                                                                                                                                             | 17,527 |
| Fut8       | Rattus norvegicus fucosyltransferase 8 (alpha (1,6) fucosyltransferase) (Fut8), mRNA [NM_001002289]                                                 | 17,517 |
| Ppp2r4     | Rattus norvegicus protein phosphatase 2A activator, regulatory subunit 4 (Ppp2r4), mRNA [NM_001108577]                                              | 17,513 |
| 0          | PWWP domain-containing protein 2A [Source:RefSeq peptide;Acc:NP_001120768] [ENSRNOT00000005227]                                                     | 17,512 |
| Utp15      | Rattus norvegicus UTP15, U3 small nucleolar ribonucleoprotein, homolog (S. cerevisiae) (Utp15), mRNA [NM_001107647]                                 | 17,511 |
| Man1a1     | Rattus norvegicus mannosidase, alpha, class 1A, member 1 (Man1a1), mRNA [NM_001033656]                                                              | 17,508 |
| RGD1308127 | Rattus norvegicus similar to 2700078E11Rik protein (RGD1308127), mRNA [NM_001014248]                                                                | 17,508 |
| Rqcd1      | Rattus norvegicus rcd1 (required for cell differentiation) homolog 1 (S. pombe) (Rqcd1), mRNA [NM_001009357]                                        | 17,506 |
| Slc6a17    | Rattus norvegicus solute carrier family 6 (neurotransmitter transporter), member 17 (Slc6a17), mRNA [NM_001033079]                                  | 17,500 |

|            |                                                                                                                                                    |        |
|------------|----------------------------------------------------------------------------------------------------------------------------------------------------|--------|
| 0          | Unknown                                                                                                                                            | 17,494 |
| 0          | Q9UL04_HUMAN (Q9UL04) Membrane protein CH1, partial (9%) [TC585082]                                                                                | 17,492 |
| Pkia       | Rattus norvegicus protein kinase (cAMP-dependent, catalytic) inhibitor alpha (Pkia), mRNA [NM_053772]                                              | 17,490 |
| Adrbk1     | Rattus norvegicus adrenergic, beta, receptor kinase 1 (Adrbk1), mRNA [NM_012776]                                                                   | 17,486 |
| Vcpip1     | Deubiquitinating protein VCIP135 [Source:UniProtKB/Swiss-Prot;Acc:Q8CF97] [ENSRNOT00000009136]                                                     | 17,484 |
| 0          | Unknown                                                                                                                                            | 17,483 |
| Cenpt      | Rattus norvegicus centromere protein T (Cenpt), mRNA [NM_001024257]                                                                                | 17,477 |
| Fkbp10     | Rattus norvegicus FK506 binding protein 10 (Fkbp10), mRNA [NM_001014120]                                                                           | 17,477 |
| LOC691684  | PREDICTED: Rattus norvegicus similar to MIC2 like 1 (LOC691684), mRNA [XM_001079259]                                                               | 17,476 |
| Thy1       | Rattus norvegicus Thy-1 cell surface antigen (Thy1), mRNA [NM_012673]                                                                              | 17,475 |
| Pcbd1      | Rattus norvegicus pterin-4 alpha-carbinolamine dehydratase/dimerization cofactor of hepatocyte nuclear factor 1 alpha (Pcbd1), mRNA [NM_001007601] | 17,473 |
| Tmem175    | Rattus norvegicus transmembrane protein 175 (Tmem175), mRNA [NM_001013991]                                                                         | 17,469 |
| Dot1l      | Rattus norvegicus DOT1-like, histone H3 methyltransferase ( <i>S. cerevisiae</i> ) (Dot1l), mRNA [NM_001108733]                                    | 17,468 |
| Osbp12     | Rattus norvegicus oxysterol binding protein-like 2 (Osbp12), mRNA [NM_001013079]                                                                   | 17,464 |
| Cntn4      | Rattus norvegicus contactin 4 (Cntn4), mRNA [NM_053879]                                                                                            | 17,459 |
| Tecta      | Rattus norvegicus tectorin alpha (Tecta), mRNA [NM_001106814]                                                                                      | 17,458 |
| Mynn       | Rattus norvegicus myoneurin (Mynn), mRNA [NM_001012178]                                                                                            | 17,454 |
| Pigh       | Rattus norvegicus phosphatidylinositol glycan anchor biosynthesis, class H (Pigh), mRNA [NM_001108714]                                             | 17,452 |
| RGD1562018 | Rattus norvegicus similar to Protein C14orf101 homolog (RGD1562018), mRNA [NM_001170475]                                                           | 17,446 |
| Rcc1       | Rattus norvegicus regulator of chromosome condensation 1 (Rcc1), mRNA [NM_001128189]                                                               | 17,444 |
| Rbbp9      | Rattus norvegicus retinoblastoma binding protein 9 (Rbbp9), mRNA [NM_019219]                                                                       | 17,444 |
| 0          | Uncharacterized protein [Source:UniProtKB/TrEMBL;Acc:D3ZML2] [ENSRNOT00000054868]                                                                  | 17,444 |
| Kb21       | Rattus norvegicus type II keratin Kb21 (Kb21), mRNA [NM_001008814]                                                                                 | 17,442 |
| Sp4        | Rattus norvegicus Sp4 transcription factor (Sp4), mRNA [NM_012761]                                                                                 | 17,442 |
| Stau1      | Rattus norvegicus staufen RNA binding protein homolog 1 ( <i>Drosophila</i> ) (Stau1), transcript variant 1, mRNA [NM_053436]                      | 17,440 |
| 0          | AGENCOURT_118864812 NIH_MGC_248 Rattus norvegicus cDNA clone IMAGE:9113290 5', mRNA sequence [EX491730]                                            | 17,440 |
| Dcun1d3    | Rattus norvegicus DCN1, defective in cullin neddylation 1, domain containing 3 ( <i>S. cerevisiae</i> ) (Dcun1d3), mRNA [NM_001024886]             | 17,437 |
| Gpr126     | PREDICTED: Rattus norvegicus G protein-coupled receptor 126 (Gpr126), mRNA [XM_218313]                                                             | 17,433 |
| 0          | Unknown                                                                                                                                            | 17,431 |
| Hmgb1      | Rattus norvegicus high mobility group box 1 (Hmgb1), mRNA [NM_012963]                                                                              | 17,430 |
| Phlda2     | Rattus norvegicus pleckstrin homology-like domain, family A, member 2 (Phlda2), transcript variant 1, mRNA [NM_001100521]                          | 17,429 |
| Chd4       | PREDICTED: Rattus norvegicus chromodomain helicase DNA binding protein 4 (Chd4), mRNA [XM_232354]                                                  | 17,422 |
| Tsku       | Rattus norvegicus tsukushin (Tsku), mRNA [NM_001009965]                                                                                            | 17,420 |

|            |                                                                                                                                    |               |
|------------|------------------------------------------------------------------------------------------------------------------------------------|---------------|
| 0          | Unknown                                                                                                                            | <b>17,419</b> |
| Rap1gds1   | Rattus norvegicus RAP1, GTP-GDP dissociation stimulator 1 (Rap1gds1), mRNA [NM_001107728]                                          | <b>17,413</b> |
| MGC125086  | Rattus norvegicus similar to RIKEN cDNA 5133401N09 (MGC125086), mRNA [NM_001037362]                                                | <b>17,410</b> |
| Dhrs1      | Rattus norvegicus dehydrogenase/reductase (SDR family) member 1 (Dhrs1), mRNA [NM_001007621]                                       | <b>17,409</b> |
| Robo2      | Rattus norvegicus roundabout homolog 2 (Drosophila) (Robo2), mRNA [NM_032106]                                                      | <b>17,404</b> |
| Lasp1      | Rattus norvegicus LIM and SH3 protein 1 (Lasp1), mRNA [NM_032613]                                                                  | <b>17,399</b> |
| 0          | Unknown                                                                                                                            | <b>17,399</b> |
| RGD1306502 | Rattus norvegicus similar to hypothetical protein FLJ11193 (RGD1306502), mRNA [NM_001107654]                                       | <b>17,399</b> |
| Gpr17      | Rattus norvegicus G protein-coupled receptor 17 (Gpr17), mRNA [NM_001071777]                                                       | <b>17,397</b> |
| Ccnt1      | Rattus norvegicus cyclin T1 (Ccnt1), mRNA [NM_001108110]                                                                           | <b>17,394</b> |
| 0          | Unknown                                                                                                                            | <b>17,394</b> |
| 0          | Q6P501_RAT (Q6P501) Lysosomal-associated protein transmembrane 4 alpha, partial (11%) [TC646831]                                   | <b>17,391</b> |
| Fbln7      | Uncharacterized protein [Source:UniProtKB/TrEMBL;Acc:D3ZSY7] [ENSRNOT00000023708]                                                  | <b>17,387</b> |
| Slco3a1    | Rattus norvegicus solute carrier organic anion transporter family, member 3a1 (Slco3a1), mRNA [NM_177481]                          | <b>17,382</b> |
| 0          | Unknown                                                                                                                            | <b>17,380</b> |
| Rgs17      | Rattus norvegicus regulator of G-protein signaling 17 (Rgs17), mRNA [NM_001107459]                                                 | <b>17,378</b> |
| Exoc4      | Rattus norvegicus exocyst complex component 4 (Exoc4), mRNA [NM_053875]                                                            | <b>17,377</b> |
| Ctnnd1     | Rattus norvegicus catenin (cadherin associated protein), delta 1 (Ctnnd1), mRNA [NM_001107740]                                     | <b>17,374</b> |
| Slc25a29   | Rattus norvegicus solute carrier family 25, member 29 (Slc25a29), nuclear gene encoding mitochondrial protein, mRNA [NM_001010958] | <b>17,366</b> |
| Tmem111    | Rattus norvegicus transmembrane protein 111 (Tmem111), mRNA [NM_001008355]                                                         | <b>17,360</b> |
| Vof16      | Rattus norvegicus ischemia related factor vof-16 (Vof16), non-coding RNA [NR_037614]                                               | <b>17,359</b> |
| Rasl10b    | Rattus norvegicus RAS-like, family 10, member B (Rasl10b), mRNA [NM_001191648]                                                     | <b>17,357</b> |
| Osbp2      | Rattus norvegicus oxysterol binding protein 2 (Osbp2), mRNA [NM_001107232]                                                         | <b>17,355</b> |
| Kitlg      | Rattus norvegicus KIT ligand (Kitlg), transcript variant 1, mRNA [NM_021843]                                                       | <b>17,354</b> |
| Ogfod1     | Rattus norvegicus 2-oxoglutarate and iron-dependent oxygenase domain containing 1 (Ogfod1), mRNA [NM_001107411]                    | <b>17,351</b> |
| Grpel2     | Rattus norvegicus GrpE-like 2, mitochondrial (Grpel2), nuclear gene encoding mitochondrial protein, mRNA [NM_001109513]            | <b>17,351</b> |
| Nox1       | Rattus norvegicus NADPH oxidase 1 (Nox1), mRNA [NM_053683]                                                                         | <b>17,348</b> |
| Qpctl      | Rattus norvegicus glutaminyl-peptide cyclotransferase-like (Qpctl), mRNA [NM_001106230]                                            | <b>17,345</b> |
| Igf1       | Rattus norvegicus insulin-like growth factor 1 (Igf1), transcript variant 2, mRNA [NM_178866]                                      | <b>17,337</b> |
| RGD1563973 | PREDICTED: Rattus norvegicus similar to Gene model 50 (RGD1563973), mRNA [XM_001056614]                                            | <b>17,336</b> |
| 0          | Unknown                                                                                                                            | <b>17,333</b> |
| Phf5a      | Rattus norvegicus PHD finger protein 5A (Phf5a), mRNA [NM_138888]                                                                  | <b>17,327</b> |
| Uhmk1      | Rattus norvegicus U2AF homology motif (UHM) kinase 1 (Uhmk1), mRNA [NM_017293]                                                     | <b>17,325</b> |
| Scrn3      | Rattus norvegicus secernin 3 (Scrn3), mRNA [NM_001013162]                                                                          | <b>17,325</b> |

|            |                                                                                                                                                   |        |
|------------|---------------------------------------------------------------------------------------------------------------------------------------------------|--------|
| Tmem222    | Rattus norvegicus transmembrane protein 222 (Tmem222), mRNA [NM_001113780]                                                                        | 17,323 |
| Zdhhc8     | Rattus norvegicus zinc finger, DHHC-type containing 8 (Zdhhc8), mRNA [NM_001039021]                                                               | 17,317 |
| Alpk3      | Rattus norvegicus alpha-kinase 3 (Alpk3), mRNA [NM_001191895]                                                                                     | 17,309 |
| Fxyd2      | Rattus norvegicus FXYD domain-containing ion transport regulator 2 (Fxyd2), transcript variant a, mRNA [NM_145717]                                | 17,307 |
| Rhod       | Rattus norvegicus ras homolog gene family, member D (Rhod), mRNA [NM_001106323]                                                                   | 17,306 |
| Slc7a1     | Rattus norvegicus solute carrier family 7 (cationic amino acid transporter, y+ system), member 1 (Slc7a1), mRNA [NM_013111]                       | 17,304 |
| 0          | Unknown                                                                                                                                           | 17,304 |
| Vsnl1      | Rattus norvegicus visinin-like 1 (Vsnl1), mRNA [NM_012686]                                                                                        | 17,303 |
| Mina       | Rattus norvegicus myc induced nuclear antigen (Mina), mRNA [NM_153309]                                                                            | 17,299 |
| Mt2A       | Rattus norvegicus metallothionein 2A (Mt2A), mRNA [NM_001137564]                                                                                  | 17,298 |
| Pabpc4     | Rattus norvegicus poly(A) binding protein, cytoplasmic 4 (Pabpc4), mRNA [NM_001100538]                                                            | 17,296 |
| LOC687144  | PREDICTED: Rattus norvegicus similar to RT1 class I, CE4 (LOC687144), mRNA [XM_001077245]                                                         | 17,294 |
| Heatr2     | Rattus norvegicus HEAT repeat containing 2 (Heatr2), mRNA [NM_001134857]                                                                          | 17,290 |
| 0          | Unknown                                                                                                                                           | 17,288 |
| RGD1565591 | Q6NV61_MOUSE (Q6NV61) Ski protein, partial (48%) [TC590169]                                                                                       | 17,287 |
| 0          | Rattus norvegicus similar to ubiquitin-conjugating enzyme E2D 1, UBC4/5 homolog; ubiquitin-conjugating enzyme E2D 1 (LOC361831), mRNA [XM_342125] | 17,287 |
| LOC304558  | Uncharacterized protein [Source:UniProtKB/TrEMBL;Acc:D3ZXP1] [ENSRNOT00000046920]                                                                 | 17,286 |
| Spag4l     | Rattus norvegicus sperm associated antigen 4-like (Spag4l), mRNA [NM_001106530]                                                                   | 17,284 |
| RGD1311564 | Rattus norvegicus LOC360590 (RGD1311564), mRNA [NM_001108286]                                                                                     | 17,279 |
| Xiap       | Rattus norvegicus X-linked inhibitor of apoptosis (Xiap), mRNA [NM_022231]                                                                        | 17,279 |
| Arpc5      | Rattus norvegicus actin related protein 2/3 complex, subunit 5 (Arpc5), mRNA [NM_001025717]                                                       | 17,277 |
| Enpp3      | Rattus norvegicus ectonucleotide pyrophosphatase/phosphodiesterase 3 (Enpp3), mRNA [NM_019370]                                                    | 17,276 |
| Olr522     | Rattus norvegicus olfactory receptor 522 (Olr522), mRNA [NM_001000562]                                                                            | 17,275 |
| RGD1309049 | Rattus norvegicus similar to RIKEN cDNA 4933415F23 (RGD1309049), mRNA [NM_001013956]                                                              | 17,272 |
| Syng1      | Rattus norvegicus synaptogyrin 1 (Syng1), mRNA [NM_019166]                                                                                        | 17,271 |
| Tle3       | Rattus norvegicus transducin-like enhancer of split 3 (E(sp1) homolog, Drosophila) (Tle3), mRNA [NM_053400]                                       | 17,267 |
| Cyp2j4     | Rattus norvegicus cytochrome P450, family 2, subfamily j, polypeptide 4 (Cyp2j4), mRNA [NM_023025]                                                | 17,262 |
| Pde7b      | Rattus norvegicus phosphodiesterase 7B (Pde7b), mRNA [NM_080894]                                                                                  | 17,262 |
| Ndr3       | Rattus norvegicus N-myc downstream regulated gene 3 (Ndr3), mRNA [NM_001013923]                                                                   | 17,262 |
| Gps1       | Rattus norvegicus G protein pathway suppressor 1 (Gps1), mRNA [NM_053969]                                                                         | 17,259 |
| Fam124a    | Fam124a protein [Source:UniProtKB/TrEMBL;Acc:Q6AXP0] [ENSRNOT00000012990]                                                                         | 17,259 |
| Pogz       | Rattus norvegicus pogo transposable element with ZNF domain (Pogz), mRNA [NM_001107693]                                                           | 17,256 |
| Aaas       | Rattus norvegicus achalasia, adrenocortical insufficiency, alacrimia (Allgrove, triple-A) (Aaas), mRNA [NM_001106795]                             | 17,253 |

|            |                                                                                                                            |        |
|------------|----------------------------------------------------------------------------------------------------------------------------|--------|
| Kank1      | Rattus norvegicus KN motif and ankyrin repeat domains 1 (Kank1), mRNA [NM_001037197]                                       | 17,251 |
| 0          | Uncharacterized protein [Source:UniProtKB/TrEMBL;Acc:D4A7X0] [ENSRNOT00000034908]                                          | 17,247 |
| Cnp        | Rattus norvegicus 2',3'-cyclic nucleotide 3' phosphodiesterase (Cnp), mRNA [NM_012809]                                     | 17,245 |
| Bbs4       | Rattus norvegicus Bardet-Biedl syndrome 4 (Bbs4), mRNA [NM_001106826]                                                      | 17,245 |
| Tnfaip8    | Rattus norvegicus tumor necrosis factor, alpha-induced protein 8 (Tnfaip8), mRNA [NM_001107387]                            | 17,243 |
| Ctf1       | Rattus norvegicus cardiotrophin 1 (Ctf1), mRNA [NM_017129]                                                                 | 17,240 |
| RGD1566033 | PREDICTED: Rattus norvegicus similar to BC003940 protein (RGD1566033), mRNA [XM_001070540]                                 | 17,240 |
| Kcnj12     | Rattus norvegicus potassium inwardly-rectifying channel, subfamily J, member 12 (Kcnj12), mRNA [NM_053981]                 | 17,238 |
| Mip        | Rattus norvegicus major intrinsic protein of lens fiber (Mip), mRNA [NM_001105719]                                         | 17,237 |
| Dpf1       | Rattus norvegicus D4, zinc and double PHD fingers family 1 (Dpf1), mRNA [NM_001105729]                                     | 17,232 |
| LOC691317  | Uncharacterized protein [Source:UniProtKB/TrEMBL;Acc:D3ZDG4] [ENSRNOT00000012080]                                          | 17,231 |
| Pcbp4      | Rattus norvegicus poly(rC) binding protein 4 (Pcbp4), mRNA [NM_001191883]                                                  | 17,231 |
| RGD1308019 | Rattus norvegicus similar to hypothetical protein FLJ20245 (RGD1308019), mRNA [NM_001107816]                               | 17,229 |
| Rbm25      | Rattus norvegicus RNA binding motif protein 25 (Rbm25), mRNA [NM_001108984]                                                | 17,229 |
| 0          | Unknown                                                                                                                    | 17,225 |
| Gbas       | Rattus norvegicus glioblastoma amplified sequence (Gbas), nuclear gene encoding mitochondrial protein, mRNA [NM_001017486] | 17,225 |
| Cd38       | Rattus norvegicus CD38 molecule (Cd38), mRNA [NM_013127]                                                                   | 17,224 |
| Carm1      | Rattus norvegicus coactivator-associated arginine methyltransferase 1 (Carm1), transcript variant 1, mRNA [NM_001030041]   | 17,222 |
| Ado        | Rattus norvegicus 2-aminoethanethiol (cysteamine) dioxygenase (Ado), mRNA [NM_001107626]                                   | 17,221 |
| Znf488     | Uncharacterized protein [Source:UniProtKB/TrEMBL;Acc:D4AAF0] [ENSRNOT00000031496]                                          | 17,220 |
| Nup210     | Rattus norvegicus nucleoporin 210 (Nup210), mRNA [NM_053322]                                                               | 17,219 |
| Mcm3       | Rattus norvegicus minichromosome maintenance complex component 3 (Mcm3), mRNA [NM_001191805]                               | 17,216 |
| RGD1559917 | Rattus norvegicus similar to SMT3 suppressor of mif two 3 homolog 2 (LOC287993), mRNA [XM_212687]                          | 17,215 |
| Dgat2      | Rattus norvegicus diacylglycerol O-acyltransferase homolog 2 (mouse) (Dgat2), mRNA [NM_001012345]                          | 17,211 |
| Fam13c1    | PREDICTED: Rattus norvegicus family with sequence similarity 13, member C1 (Fam13c1), mRNA [XM_001080212]                  | 17,205 |
| RGD1559864 | PREDICTED: Rattus norvegicus similar to mKIAA1045 protein, transcript variant 1 (RGD1559864), mRNA [XM_002729465]          | 17,202 |
| Cryl1      | Rattus norvegicus crystallin, lambda 1 (Cryl1), mRNA [NM_175757]                                                           | 17,202 |
| Chd3       | PREDICTED: Rattus norvegicus chromodomain helicase DNA binding protein 3 (Chd3), mRNA [XM_220602]                          | 17,195 |
| 0          | Unknown                                                                                                                    | 17,194 |
| Tmem106c   | Rattus norvegicus transmembrane protein 106C (Tmem106c), mRNA [NM_001008358]                                               | 17,191 |
| 0          | Unknown                                                                                                                    | 17,189 |
| RGD1303066 | Rattus norvegicus similar to RIKEN cDNA 2610110G12 (RGD1303066), mRNA [NM_212498]                                          | 17,188 |
| LOC689919  | PREDICTED: Rattus norvegicus similar to 40S ribosomal protein S26 (LOC689919), mRNA [XM_001072530]                         | 17,187 |
| Amac1      | Rattus norvegicus acyl-malonyl condensing enzyme 1 (Amac1), mRNA [NM_001127658]                                            | 17,179 |

|            |                                                                                                                                                       |               |
|------------|-------------------------------------------------------------------------------------------------------------------------------------------------------|---------------|
| Igfbp4     | Rattus norvegicus insulin-like growth factor binding protein 4 (Igfbp4), mRNA [NM_001004274]                                                          | <b>17,176</b> |
| Grin1      | Rattus norvegicus glutamate receptor, ionotropic, N-methyl D-aspartate 1 (Grin1), mRNA [NM_017010]                                                    | <b>17,174</b> |
| B3galt6    | Rattus norvegicus UDP-Gal:betaGal beta 1,3-galactosyltransferase, polypeptide 6 (B3galt6), mRNA [NM_001106699]                                        | <b>17,173</b> |
| 0          | Unknown                                                                                                                                               | <b>17,168</b> |
| Arhgap42   | PREDICTED: Rattus norvegicus similar to novel protein similar to human oligophrenin 1 (OPHN1), transcript variant 1 (RGD1564081), mRNA [XM_001073215] | <b>17,167</b> |
| Slitrk5    | Rattus norvegicus SLIT and NTRK-like family, member 5 (Slitrk5), mRNA [NM_001107284]                                                                  | <b>17,163</b> |
| 0          | Unknown                                                                                                                                               | <b>17,161</b> |
| Ndufb4     | Rattus norvegicus NADH dehydrogenase (ubiquinone) 1 beta subcomplex 4 (Ndufb4), nuclear gene encoding mitochondrial protein, mRNA [NM_001037338]      | <b>17,160</b> |
| 0          | Unknown                                                                                                                                               | <b>17,154</b> |
| Foxi1      | Rattus norvegicus forkhead box I1 (Foxi1), mRNA [NM_001105776]                                                                                        | <b>17,154</b> |
| Mak16      | Rattus norvegicus MAK16 homolog (S. cerevisiae) (Mak16), mRNA [NM_001014002]                                                                          | <b>17,152</b> |
| RGD1565149 | Rattus norvegicus similar to chromosome 16 open reading frame 7 (RGD1565149), mRNA [NM_001107440]                                                     | <b>17,150</b> |
| Ing4       | Rattus norvegicus inhibitor of growth family, member 4 (Ing4), mRNA [NM_001079887]                                                                    | <b>17,149</b> |
| 0          | Unknown                                                                                                                                               | <b>17,148</b> |
| LOC687746  | PREDICTED: Rattus norvegicus similar to Mitochondrial import inner membrane translocase subunit Tim17-B (LOC687746), mRNA [XM_001080001]              | <b>17,146</b> |
| Clstn2     | Rattus norvegicus calyntenin 2 (Clstn2), mRNA [NM_134377]                                                                                             | <b>17,145</b> |
| Abcc4      | Rattus norvegicus ATP-binding cassette, subfamily C (CFTR/MRP), member 4 (Abcc4), mRNA [NM_133411]                                                    | <b>17,145</b> |
| 0          | Unknown                                                                                                                                               | <b>17,141</b> |
| Tank       | Rattus norvegicus TRAF family member-associated NFKB activator (Tank), transcript variant 1, mRNA [NM_145788]                                         | <b>17,139</b> |
| Bcl7b      | Rattus norvegicus B-cell CLL/lymphoma 7B (Bcl7b), mRNA [NM_001109021]                                                                                 | <b>17,132</b> |
| Samd10     | Rattus norvegicus sterile alpha motif domain containing 10 (Samd10), mRNA [NM_001191967]                                                              | <b>17,128</b> |
| Dlg3       | Rattus norvegicus discs, large homolog 3 (Drosophila) (Dlg3), mRNA [NM_031639]                                                                        | <b>17,127</b> |
| Rnf114     | Rattus norvegicus ring finger protein 114 (Rnf114), mRNA [NM_001001517]                                                                               | <b>17,127</b> |
| Fcer1g     | Rattus norvegicus Fc fragment of IgE, high affinity I, receptor for; gamma polypeptide (Fcer1g), mRNA [NM_001131001]                                  | <b>17,127</b> |
| Vsig10l    | Unknown                                                                                                                                               | <b>17,127</b> |
| Kcnk13     | Rattus norvegicus potassium channel, subfamily K, member 13 (Kcnk13), mRNA [NM_022293]                                                                | <b>17,120</b> |
| 0          | Unknown                                                                                                                                               | <b>17,116</b> |
| 0          | Unknown                                                                                                                                               | <b>17,114</b> |
| Plxdc1     | Rattus norvegicus plexin domain containing 1 (Plxdc1), mRNA [NM_001107046]                                                                            | <b>17,112</b> |
| Sult1a1    | Rattus norvegicus sulfotransferase family, cytosolic, 1A, phenol-preferring, member 1 (Sult1a1), mRNA [NM_031834]                                     | <b>17,109</b> |
| Ubxn2a     | Rattus norvegicus UBX domain protein 2A (Ubxn2a), mRNA [NM_001109482]                                                                                 | <b>17,109</b> |

|           |                                                                                                                                          |               |
|-----------|------------------------------------------------------------------------------------------------------------------------------------------|---------------|
| Olr1238   | Rattus norvegicus olfactory receptor 1238 (Olr1238), mRNA [NM_001001013]                                                                 | <b>17,104</b> |
| Dnajb13   | Rattus norvegicus DnaJ (Hsp40) related, subfamily B, member 13 (Dnajb13), mRNA [NM_001005885]                                            | <b>17,102</b> |
| 0         | Unknown                                                                                                                                  | <b>17,102</b> |
| Gpr37     | Rattus norvegicus G protein-coupled receptor 37 (Gpr37), mRNA [NM_057201]                                                                | <b>17,093</b> |
| 0         | Uncharacterized protein [Source:UniProtKB/TrEMBL;Acc:D4A319] [ENSRNOT00000007828]                                                        | <b>17,090</b> |
| 0         | Unknown                                                                                                                                  | <b>17,088</b> |
| Mtvr2     | Rattus norvegicus mammary tumor virus receptor 2 (Mtvr2), mRNA [NM_001015013]                                                            | <b>17,085</b> |
| Sf3b1     | Rattus norvegicus splicing factor 3b, subunit 1 (Sf3b1), mRNA [NM_053426]                                                                | <b>17,085</b> |
| Foxj2     | Rattus norvegicus forkhead box J2 (Foxj2), mRNA [NM_001109352]                                                                           | <b>17,084</b> |
| 0         | Unknown                                                                                                                                  | <b>17,076</b> |
| Swap70    | Rattus norvegicus SWAP switching B-cell complex 70 (Swap70), mRNA [NM_001106288]                                                         | <b>17,073</b> |
| 0         | EST352678 Rat gene index, normalized rat, norvegicus, Bento Soares Rattus norvegicus cDNA clone RGIHT15 5' end, mRNA sequence [AW921374] | <b>17,072</b> |
| Eif4ebp1  | Rattus norvegicus eukaryotic translation initiation factor 4E binding protein 1 (Eif4ebp1), mRNA [NM_053857]                             | <b>17,070</b> |
| Dbp       | Rattus norvegicus D site of albumin promoter (albumin D-box) binding protein (Dbp), mRNA [NM_012543]                                     | <b>17,069</b> |
| Syng3     | Rattus norvegicus synaptogyrin 3 (Syng3), mRNA [NM_001106985]                                                                            | <b>17,064</b> |
| LOC685050 | PREDICTED: Rattus norvegicus hypothetical protein LOC685050 (LOC685050), mRNA [XM_001062068]                                             | <b>17,062</b> |
| Mettl2    | Rattus norvegicus methyltransferase like 2 (Mettl2), mRNA [NM_001108839]                                                                 | <b>17,061</b> |
| Abtb2     | Rattus norvegicus ankyrin repeat and BTB (POZ) domain containing 2 (Abtb2), mRNA [NM_134403]                                             | <b>17,057</b> |
| Hecw2     | Rattus norvegicus HECT, C2 and WW domain containing E3 ubiquitin protein ligase 2 (Hecw2), mRNA [NM_001108218]                           | <b>17,056</b> |
| Arrb2     | Rattus norvegicus arrestin, beta 2 (Arrb2), mRNA [NM_012911]                                                                             | <b>17,050</b> |
| Vgll4     | Rattus norvegicus vestigial like 4 (Drosophila) (Vgll4), mRNA [NM_001015004]                                                             | <b>17,049</b> |
| Ptk7      | Rattus norvegicus PTK7 protein tyrosine kinase 7 (Ptk7), mRNA [NM_001106889]                                                             | <b>17,048</b> |
| Mmp27     | Rattus norvegicus matrix metalloproteinase 27 (Mmp27), mRNA [NM_001106799]                                                               | <b>17,046</b> |
| 0         | Rattus norvegicus chromosome 1, 5 clones, strain BN/SsNHsdMCW RNOR03207167, whole genome shotgun sequence [AABR03001102]                 | <b>17,045</b> |
| Slc2a6    | Rattus norvegicus solute carrier family 2 (facilitated glucose transporter), member 6 (Slc2a6), mRNA [NM_001106562]                      | <b>17,044</b> |
| Tmed10    | Rattus norvegicus transmembrane emp24-like trafficking protein 10 (yeast) (Tmed10), mRNA [NM_053467]                                     | <b>17,042</b> |
| Trim9     | Rattus norvegicus tripartite motif-containing 9 (Trim9), mRNA [NM_130420]                                                                | <b>17,042</b> |
| 0         | Unknown                                                                                                                                  | <b>17,041</b> |
| 0         | Unknown                                                                                                                                  | <b>17,037</b> |
| Taf15     | Rattus norvegicus TAF15 RNA polymerase II, TATA box binding protein (TBP)-associated factor (Taf15), mRNA [NM_001105824]                 | <b>17,037</b> |
| Gria4     | Rattus norvegicus glutamate receptor, ionotropic, AMPA 4 (Gria4), transcript variant 3, mRNA [NM_001113185]                              | <b>17,037</b> |
| Tm9sf3    | PREDICTED: Rattus norvegicus transmembrane 9 superfamily member 3 (Tm9sf3), mRNA [XM_002725800]                                          | <b>17,036</b> |
| Adora1    | Rattus norvegicus adenosine A1 receptor (Adora1), mRNA [NM_017155]                                                                       | <b>17,035</b> |



|              |                                                                                                                                                      |        |
|--------------|------------------------------------------------------------------------------------------------------------------------------------------------------|--------|
| Slc26a11     | PREDICTED: Rattus norvegicus solute carrier family 26, member 11 (Slc26a11), partial mRNA [XM_340944]                                                | 17,031 |
| Gpr114       | Rattus norvegicus G protein-coupled receptor 114 (Gpr114), mRNA [NM_001107410]                                                                       | 17,031 |
| Fam193a      | Uncharacterized protein [Source:UniProtKB/TrEMBL;Acc:D3ZIG8] [ENSRNOT00000018616]                                                                    | 17,030 |
| Kcnv2        | Rattus norvegicus potassium channel, subfamily V, member 2 (Kcnv2), mRNA [NM_001106370]                                                              | 17,030 |
| Hccs         | Rattus norvegicus holocytochrome c synthetase (Hccs), mRNA [NM_001191732]                                                                            | 17,027 |
| Rpgr         | Rattus norvegicus retinitis pigmentosa GTPase regulator (Rpgr), mRNA [NM_001127601]                                                                  | 17,022 |
| Pi4k2a       | Rattus norvegicus phosphatidylinositol 4-kinase type 2 alpha (Pi4k2a), mRNA [NM_053735]                                                              | 17,020 |
| 0            | Rattus norvegicus similar to 60S RIBOSOMAL PROTEIN L29 (P23) (LOC294100), mRNA [XM_220073]                                                           | 17,017 |
| 0            | Unknown                                                                                                                                              | 17,017 |
| Dgki         | Rattus norvegicus diacylglycerol kinase, iota (Dgki), mRNA [NM_198782]                                                                               | 17,014 |
| Aifm2        | Rattus norvegicus apoptosis-inducing factor, mitochondrion-associated 2 (Aifm2), nuclear gene encoding mitochondrial protein, mRNA [NM_001139483]    | 17,012 |
| Sfrs6        | Rattus norvegicus splicing factor, arginine/serine-rich 6 (Sfrs6), mRNA [NM_001014185]                                                               | 17,010 |
| Rtkn         | Rattus norvegicus rhotekin (Rtkn), mRNA [NM_184046]                                                                                                  | 17,007 |
| 0            | Unknown                                                                                                                                              | 17,004 |
| Palm         | Rattus norvegicus paralemmin (Palm), mRNA [NM_130829]                                                                                                | 17,002 |
| 0            | Unknown                                                                                                                                              | 16,998 |
| Serinc4      | Rattus norvegicus serine incorporator 4 (Serinc4), mRNA [NM_001110811]                                                                               | 16,997 |
| 0            | Unknown                                                                                                                                              | 16,996 |
| Ccbe1        | Uncharacterized protein [Source:UniProtKB/TrEMBL;Acc:D4A1T8] [ENSRNOT00000034069]                                                                    | 16,995 |
| Cyp4f4       | Rattus norvegicus cytochrome P450, family 4, subfamily f, polypeptide 4 (Cyp4f4), mRNA [NM_173123]                                                   | 16,993 |
| 0            | BF284235 EST448826 Rat Gene Index, normalized rat, Rattus norvegicus cDNA Rattus norvegicus cDNA clone RGIEN17 3' sequence, mRNA sequence [BF284235] | 16,991 |
| 0            | Unknown                                                                                                                                              | 16,987 |
| Rhbdf2       | Rattus norvegicus rhomboid 5 homolog 2 (Drosophila) (Rhbdf2), mRNA [NM_001107067]                                                                    | 16,981 |
| Slc41a1      | Rattus norvegicus solute carrier family 41, member 1 (Slc41a1), mRNA [NM_001108855]                                                                  | 16,979 |
| Fam168b      | RCG22336, isoform CRA_bUncharacterized protein [Source:UniProtKB/TrEMBL;Acc:D4AEP3] [ENSRNOT00000039480]                                             | 16,978 |
| Gramd3       | Rattus norvegicus GRAM domain containing 3 (Gramd3), mRNA [NM_001014011]                                                                             | 16,978 |
| RGD1560792   | PREDICTED: Rattus norvegicus RGD1560792 (RGD1560792), mRNA [XM_001081860]                                                                            | 16,975 |
| Ablim3       | Rattus norvegicus actin binding LIM protein family, member 3 (Ablim3), mRNA [NM_001191698]                                                           | 16,974 |
| Tmcc3        | Rattus norvegicus transmembrane and coiled-coil domain family 3 (Tmcc3), mRNA [NM_001108084]                                                         | 16,971 |
| LOC100151767 | Rattus norvegicus hypothetical LOC100151767 (LOC100151767), mRNA [NM_001127503]                                                                      | 16,970 |
| LOC688708    | Uncharacterized protein [Source:UniProtKB/TrEMBL;Acc:D3ZP46] [ENSRNOT00000034463]                                                                    | 16,965 |
| RGD1306271   | Uncharacterized protein [Source:UniProtKB/TrEMBL;Acc:D3Z9D0] [ENSRNOT00000040391]                                                                    | 16,964 |

|            |                                                                                                                                                |        |
|------------|------------------------------------------------------------------------------------------------------------------------------------------------|--------|
| LOC682950  | PREDICTED: Rattus norvegicus similar to guanine nucleotide binding protein, alpha stimulating, olfactory type (LOC682950), mRNA [XM_001060921] | 16,962 |
| 0          | Unknown                                                                                                                                        | 16,954 |
| Npat       | Rattus norvegicus nuclear protein, ataxia-telangiectasia locus (Npat), mRNA [NM_001108147]                                                     | 16,948 |
| Vwa3a      | Rattus norvegicus von Willebrand factor A domain containing 3A (Vwa3a), transcript variant 2, mRNA [NM_001079885]                              | 16,948 |
| RGD1311634 | Rattus norvegicus similar to RIKEN cDNA 3200002M19 (RGD1311634), mRNA [NM_001170435]                                                           | 16,947 |
| Erc1       | Rattus norvegicus ELKS/RAB6-interacting/CAST family member 1 (Erc1), mRNA [NM_170788]                                                          | 16,944 |
| Gpm6b      | Rattus norvegicus glycoprotein m6b (Gpm6b), mRNA [NM_138846]                                                                                   | 16,944 |
| Msrb2      | Rattus norvegicus methionine sulfoxide reductase B2 (Msrb2), mRNA [NM_001031660]                                                               | 16,942 |
| Defb29     | Rattus norvegicus defensin beta 29 (Defb29), mRNA [NM_001037368]                                                                               | 16,941 |
| Snx27      | Rattus norvegicus sorting nexin family member 27 (Snx27), transcript variant 2, mRNA [NM_152847]                                               | 16,938 |
| LOC691522  | PREDICTED: Rattus norvegicus hypothetical protein LOC691522 (LOC691522), mRNA [XM_001078640]                                                   | 16,937 |
| Lysmd1     | Rattus norvegicus LysM, putative peptidoglycan-binding, domain containing 1 (Lysmd1), mRNA [NM_001024302]                                      | 16,936 |
| Rhoa       | Rattus norvegicus ras homolog gene family, member A (Rhoa), mRNA [NM_057132]                                                                   | 16,933 |
| Ppt2       | Rattus norvegicus palmitoyl-protein thioesterase 2 (Ppt2), mRNA [NM_019367]                                                                    | 16,932 |
| Pxmp4      | Rattus norvegicus peroxisomal membrane protein 4 (Pxmp4), mRNA [NM_172223]                                                                     | 16,930 |
| Mpzl1      | Rattus norvegicus myelin protein zero-like 1 (Mpzl1), mRNA [NM_001007728]                                                                      | 16,929 |
| Ctns       | Rattus norvegicus cystinosis, nephropathic (Ctns), mRNA [NM_001191647]                                                                         | 16,926 |
| Abcc2      | Rattus norvegicus ATP-binding cassette, subfamily C (CFTR/MRP), member 2 (Abcc2), mRNA [NM_012833]                                             | 16,920 |
| 0          | Unknown                                                                                                                                        | 16,917 |
| Hdac8      | Rattus norvegicus histone deacetylase 8 (Hdac8), mRNA [NM_001126373]                                                                           | 16,914 |
| Plxna2     | Rattus norvegicus plexin A2 (Plxna2), mRNA [NM_001105988]                                                                                      | 16,910 |
| Tacr1      | Rattus norvegicus tachykinin receptor 1 (Tacr1), mRNA [NM_012667]                                                                              | 16,905 |
| Vkorc111   | Rattus norvegicus vitamin K epoxide reductase complex, subunit 1-like 1 (Vkorc111), mRNA [NM_203338]                                           | 16,903 |
| Zinki      | Rattus norvegicus Arg3.1/Arc mRNA-binding zinc finger protein (Zinki), mRNA [NM_001142758]                                                     | 16,902 |
| Trib2      | Rattus norvegicus tribbles homolog 2 (Drosophila) (Trib2), mRNA [NM_001108015]                                                                 | 16,900 |
| Usp15      | Rattus norvegicus ubiquitin specific peptidase 15 (Usp15), mRNA [NM_145184]                                                                    | 16,900 |
| 0          | Uncharacterized protein [Source:UniProtKB/TrEMBL;Acc:D3ZGU0] [ENSRNOT00000041039]                                                              | 16,899 |
| RGD1311422 | PREDICTED: Rattus norvegicus similar to CG8841-PA (RGD1311422), mRNA [XM_001081678]                                                            | 16,893 |
| 0          | EPO_MOUSE (P07321) Erythropoietin precursor, partial (7%) [TC593578]                                                                           | 16,891 |
| Prdm10     | Uncharacterized protein [Source:UniProtKB/TrEMBL;Acc:D3ZQ79] [ENSRNOT00000010423]                                                              | 16,891 |
| LOC688311  | PREDICTED: Rattus norvegicus similar to ADP-ribosylation factor-like 1, transcript variant 1 (LOC688311), mRNA [XM_001081794]                  | 16,890 |
| 0          | Unknown                                                                                                                                        | 16,890 |
| 0          | Unknown                                                                                                                                        | 16,887 |

|            |                                                                                                                             |        |
|------------|-----------------------------------------------------------------------------------------------------------------------------|--------|
| Bcl2l1     | Rattus norvegicus Bcl2-like 1 (Bcl2l1), nuclear gene encoding mitochondrial protein, transcript variant 2, mRNA [NM_031535] | 16,886 |
| Zcchc3     | RCG37285Uncharacterized protein [Source:UniProtKB/TrEMBL;Acc:D3ZZ10] [ENSRNOT00000009859]                                   | 16,885 |
| Nr2f1      | Rattus norvegicus nuclear receptor subfamily 2, group F, member 1 (Nr2f1), mRNA [NM_031130]                                 | 16,881 |
| Fzd1       | Rattus norvegicus frizzled homolog 1 (Drosophila) (Fzd1), mRNA [NM_021266]                                                  | 16,879 |
| Capn5      | Rattus norvegicus calpain 5 (Capn5), mRNA [NM_134461]                                                                       | 16,878 |
| 0          | TBC1 domain family member 5 [Source:RefSeq peptide;Acc:NP_001128234] [ENSRNOT000000061800]                                  | 16,876 |
| Trmt61a    | Rattus norvegicus tRNA methyltransferase 61 homolog A (S. cerevisiae) (Trmt61a), mRNA [NM_001007706]                        | 16,873 |
| Sestd1     | Rattus norvegicus SEC14 and spectrin domains 1 (Sestd1), mRNA [NM_001134514]                                                | 16,871 |
| 0          | Unknown                                                                                                                     | 16,865 |
| Twsg1      | Rattus norvegicus twisted gastrulation homolog 1 (Drosophila) (Twsg1), mRNA [NM_001108811]                                  | 16,863 |
| RGD1311870 | Uncharacterized protein [Source:UniProtKB/TrEMBL;Acc:D3ZKN3] [ENSRNOT00000029077]                                           | 16,863 |
| Spry3      | Rattus norvegicus sprouty homolog 3 (Drosophila) (Spry3), mRNA [NM_001109063]                                               | 16,860 |
| Sik1       | Rattus norvegicus salt-inducible kinase 1 (Sik1), mRNA [NM_021693]                                                          | 16,860 |
| Slit2      | Rattus norvegicus slit homolog 2 (Drosophila) (Slit2), mRNA [NM_022632]                                                     | 16,860 |
| Pald       | Rattus norvegicus paladin (Pald), mRNA [NM_001034128]                                                                       | 16,859 |
| 0          | Uncharacterized protein [Source:UniProtKB/TrEMBL;Acc:D3ZGC8] [ENSRNOT000000068019]                                          | 16,853 |
| Bruno4     | CUGBP Elav-like family member 4 [Source:RefSeq peptide;Acc:NP_001100870] [ENSRNOT000000061151]                              | 16,851 |
| Sh2b3      | Rattus norvegicus SH2B adaptor protein 3 (Sh2b3), mRNA [NM_031621]                                                          | 16,850 |
| Ppp1r14c   | Rattus norvegicus protein phosphatase 1, regulatory (inhibitor) subunit 14c (Ppp1r14c), mRNA [NM_133425]                    | 16,849 |
| Rad23a     | Rattus norvegicus RAD23 homolog A (S. cerevisiae) (Rad23a), mRNA [NM_001013190]                                             | 16,835 |
| Dgkz       | Rattus norvegicus diacylglycerol kinase zeta (Dgkz), mRNA [NM_031143]                                                       | 16,829 |
| Rgs16      | Rattus norvegicus regulator of G-protein signaling 16 (Rgs16), mRNA [NM_001077589]                                          | 16,826 |
| LOC690126  | PREDICTED: Rattus norvegicus hypothetical protein LOC690126 (LOC690126), miscRNA [XR_006805]                                | 16,826 |
| Pax6       | Rattus norvegicus paired box 6 (Pax6), mRNA [NM_013001]                                                                     | 16,823 |
| Gmppa      | Rattus norvegicus GDP-mannose pyrophosphorylase A (Gmppa), mRNA [NM_001025056]                                              | 16,815 |
| 0          | Unknown                                                                                                                     | 16,810 |
| Eri1       | Rattus norvegicus exoribonuclease 1 (Eri1), mRNA [NM_001014143]                                                             | 16,807 |
| Rbpj       | Rattus norvegicus recombination signal binding protein for immunoglobulin kappa J region (Rbpj), mRNA [NM_001106631]        | 16,806 |
| Pef1       | Rattus norvegicus penta-EF hand domain containing 1 (Pef1), mRNA [NM_001007651]                                             | 16,805 |
| Slc29a3    | Rattus norvegicus solute carrier family 29 (nucleoside transporters), member 3 (Slc29a3), mRNA [NM_181639]                  | 16,803 |
| Ascc1      | Rattus norvegicus activating signal cointegrator 1 complex subunit 1 (Ascc1), mRNA [NM_001007632]                           | 16,801 |
| 0          | Limkain-b1 [Source:UniProtKB/Swiss-Prot;Acc:Q8VIG2] [ENSRNOT00000003193]                                                    | 16,794 |
| Bmpr1b     | Rattus norvegicus bone morphogenetic protein receptor, type IB (Bmpr1b), mRNA [NM_001024259]                                | 16,789 |
| Papd5      | Rattus norvegicus PAP associated domain containing 5 (Papd5), mRNA [NM_001107416]                                           | 16,787 |

|            |                                                                                                                                              |               |
|------------|----------------------------------------------------------------------------------------------------------------------------------------------|---------------|
| Cdc26      | Rattus norvegicus cell division cycle 26 (Cdc26), mRNA [NM_001013240]                                                                        | <b>16,785</b> |
| Rapgef1    | PREDICTED: Rattus norvegicus Rap guanine nucleotide exchange factor (GEF) 1 (Rapgef1), mRNA [XM_216018]                                      | <b>16,779</b> |
| Slc39a4    | Rattus norvegicus solute carrier family 39 (zinc transporter), member 4 (Slc39a4), mRNA [NM_001077669]                                       | <b>16,777</b> |
| Mepce      | Rattus norvegicus methylphosphate capping enzyme (Mepce), mRNA [NM_001100678]                                                                | <b>16,773</b> |
| Scly       | Rattus norvegicus selenocysteine lyase (Scly), mRNA [NM_001007755]                                                                           | <b>16,773</b> |
| 0          | Unknown                                                                                                                                      | <b>16,771</b> |
| 0          | PREDICTED: Rattus norvegicus similar to RIKEN cDNA 1700001F09 (RGD1562624), mRNA [XM_002742438]                                              | <b>16,771</b> |
| 0          | Unknown                                                                                                                                      | <b>16,768</b> |
| Trappc5    | Rattus norvegicus trafficking protein particle complex 5 (Trappc5), mRNA [NM_001108850]                                                      | <b>16,764</b> |
| Gria4      | Rattus norvegicus glutamate receptor, ionotropic, AMPA 4 (Gria4), transcript variant 1, mRNA [NM_017263]                                     | <b>16,764</b> |
| Pbx3       | Rattus norvegicus pre-B-cell leukemia homeobox 3 (Pbx3), mRNA [NM_001107834]                                                                 | <b>16,763</b> |
| Sall3      | Rattus norvegicus sal-like 3 (Drosophila) (Sall3), mRNA [NM_001108892]                                                                       | <b>16,763</b> |
| LOC690479  | PREDICTED: Rattus norvegicus hypothetical protein LOC690479 (LOC690479), mRNA [XM_001074561]                                                 | <b>16,759</b> |
| Arhgef3    | Rattus norvegicus Rho guanine nucleotide exchange factor (GEF) 3 (Arhgef3), mRNA [NM_001106061]                                              | <b>16,758</b> |
| Ptdss1     | Rattus norvegicus phosphatidylserine synthase 1 (Ptdss1), mRNA [NM_001012113]                                                                | <b>16,757</b> |
| 0          | PREDICTED: Rattus norvegicus similar to dachshund b (LOC680770), mRNA [XM_001058786]                                                         | <b>16,753</b> |
| Uqcrb      | Rattus norvegicus ubiquinol-cytochrome c reductase binding protein (Uqcrb), nuclear gene encoding mitochondrial protein, mRNA [NM_001127553] | <b>16,751</b> |
| Lypla2     | Rattus norvegicus lysophospholipase 2 (Lypla2), mRNA [NM_031342]                                                                             | <b>16,741</b> |
| Ms4a10     | Rattus norvegicus membrane-spanning 4-domains, subfamily A, member 10 (Ms4a10), mRNA [NM_001106336]                                          | <b>16,739</b> |
| 0          | Rattus norvegicus TL0AEA74YH08 mRNA sequence. [FQ231255]                                                                                     | <b>16,738</b> |
| 0          | TBC1 domain family, member 8B Gene [Source:MGI Symbol;Acc:MGI:1918101] [ENSRNOT00000051757]                                                  | <b>16,737</b> |
| LOC363306  | PREDICTED: Rattus norvegicus hypothetical protein LOC363306 (LOC363306), mRNA [XM_001068086]                                                 | <b>16,736</b> |
| Nr2c1      | Rattus norvegicus nuclear receptor subfamily 2, group C, member 1 (Nr2c1), mRNA [NM_145780]                                                  | <b>16,733</b> |
| Etl4       | PREDICTED: Rattus norvegicus similar to KIAA1217 (RGD1563437), mRNA [XM_001069190]                                                           | <b>16,731</b> |
| RGD1562608 | Rattus norvegicus similar to KIAA1328 protein (RGD1562608), mRNA [NM_001134607]                                                              | <b>16,728</b> |
| 0          | Unknown                                                                                                                                      | <b>16,726</b> |
| Ctdp1      | Rattus norvegicus CTD (carboxy-terminal domain, RNA polymerase II, polypeptide A) phosphatase, subunit 1 (Ctdp1), mRNA [NM_001106131]        | <b>16,723</b> |
| Xpo4       | Rattus norvegicus exportin 4 (Xpo4), mRNA [NM_001106042]                                                                                     | <b>16,718</b> |
| Plcxd2     | Rattus norvegicus phosphatidylinositol-specific phospholipase C, X domain containing 2 (Plcxd2), mRNA [NM_001134481]                         | <b>16,718</b> |
| 0          | Uncharacterized protein [Source:UniProtKB/TrEMBL;Acc:D3Z994] [ENSRNOT00000022945]                                                            | <b>16,712</b> |
| Doxl2      | Rattus norvegicus diamine oxidase-like protein 2 (Doxl2), mRNA [NM_199291]                                                                   | <b>16,711</b> |
| Pnpla5     | Rattus norvegicus patatin-like phospholipase domain containing 5 (Pnpla5), mRNA [NM_001130497]                                               | <b>16,710</b> |
| 0          | Unknown                                                                                                                                      | <b>16,708</b> |

|              |                                                                                                                                                             |               |
|--------------|-------------------------------------------------------------------------------------------------------------------------------------------------------------|---------------|
| Slc38a6      | Rattus norvegicus solute carrier family 38, member 6 (Slc38a6), mRNA [NM_001013099]                                                                         | <b>16,706</b> |
| Dnajc14      | Rattus norvegicus DnaJ (Hsp40) homolog, subfamily C, member 14 (Dnajc14), mRNA [NM_053690]                                                                  | <b>16,704</b> |
| Ube2d3       | Rattus norvegicus ubiquitin-conjugating enzyme E2D 3 (UBC4/5 homolog, yeast) (Ube2d3), mRNA [NM_031237]                                                     | <b>16,703</b> |
| Wars         | Rattus norvegicus tryptophanyl-tRNA synthetase (Wars), mRNA [NM_001013170]                                                                                  | <b>16,702</b> |
| LOC685079    | PREDICTED: Rattus norvegicus similar to Protein SYS1 homolog (LOC685079), mRNA [XM_001062200]                                                               | <b>16,698</b> |
| RGD1305415   | Uncharacterized protein [Source:UniProtKB/TrEMBL;Acc:D3ZQL6] [ENSRNOT00000036357]                                                                           | <b>16,694</b> |
| Nusap1       | Rattus norvegicus nucleolar and spindle associated protein 1 (Nusap1), mRNA [NM_001107762]                                                                  | <b>16,690</b> |
| Add1         | Rattus norvegicus adducin 1 (alpha) (Add1), mRNA [NM_016990]                                                                                                | <b>16,689</b> |
| Atp8b2       | Rattus norvegicus Atpase, class I, type 8B, member 2 (Atp8b2), mRNA [NM_001024798]                                                                          | <b>16,688</b> |
| LOC687675    | PREDICTED: Rattus norvegicus similar to heparan sulfate D-glucosaminyl 3-O-sulfotransferase 4 (LOC687675), mRNA [XM_001079681]                              | <b>16,688</b> |
| LOC100364346 | Uncharacterized protein [Source:UniProtKB/TrEMBL;Acc:D4ACG5] [ENSRNOT00000048875]                                                                           | <b>16,687</b> |
| 0            | Unknown                                                                                                                                                     | <b>16,685</b> |
| Ntrk3        | Rattus norvegicus neurotrophic tyrosine kinase, receptor, type 3 (Ntrk3), mRNA [NM_019248]                                                                  | <b>16,684</b> |
| Rhobtb1      | Rattus norvegicus Rho-related BTB domain containing 1 (Rhobtb1), mRNA [NM_001107622]                                                                        | <b>16,683</b> |
| Ftsj2        | Rattus norvegicus FtsJ homolog 2 (E. coli) (Ftsj2), mRNA [NM_001107125]                                                                                     | <b>16,673</b> |
| St3gal4      | Rattus norvegicus ST3 beta-galactoside alpha-2,3-sialyltransferase 4 (St3gal4), mRNA [NM_203337]                                                            | <b>16,672</b> |
| 0            | Unknown                                                                                                                                                     | <b>16,666</b> |
| 0            | Uncharacterized protein [Source:UniProtKB/TrEMBL;Acc:D4A7T3] [ENSRNOT00000002842]                                                                           | <b>16,659</b> |
| Wbp11        | Rattus norvegicus WW domain binding protein 11 (Wbp11), mRNA [NM_001009661]                                                                                 | <b>16,657</b> |
| Ficd         | Rattus norvegicus FIC domain containing (Ficd), mRNA [NM_001010946]                                                                                         | <b>16,656</b> |
| LOC363434    | PREDICTED: Rattus norvegicus similar to Discs large homolog 5 (Placenta and prostate DLG) (Discs large protein P-dlg) (LOC363434), partial mRNA [XM_343756] | <b>16,651</b> |
| RGD1562987   | Rattus norvegicus similar to cDNA sequence BC031181 (RGD1562987), mRNA [NM_001173472]                                                                       | <b>16,649</b> |
| Garnl1       | Rattus norvegicus GTPase activating Rap/RanGAP domain-like 1 (Garnl1), mRNA [NM_020083]                                                                     | <b>16,648</b> |
| Nadk         | Rattus norvegicus NAD kinase (Nadk), mRNA [NM_001109678]                                                                                                    | <b>16,643</b> |
| Znf641       | Rattus norvegicus zinc finger protein 641 (Znf641), mRNA [NM_001106792]                                                                                     | <b>16,641</b> |
| Slc6a7       | Rattus norvegicus solute carrier family 6 (neurotransmitter transporter, L-proline), member 7 (Slc6a7), mRNA [NM_053996]                                    | <b>16,639</b> |
| Lrrc8b       | Rattus norvegicus leucine rich repeat containing 8 family, member B (Lrrc8b), mRNA [NM_001107204]                                                           | <b>16,634</b> |
| Plod2        | Rattus norvegicus procollagen lysine, 2-oxoglutarate 5-dioxygenase 2 (Plod2), transcript variant 1, mRNA [NM_175869]                                        | <b>16,633</b> |
| Rreb1        | Rattus norvegicus ras responsive element binding protein 1 (Rreb1), mRNA [NM_001107348]                                                                     | <b>16,632</b> |
| Znf668       | Rattus norvegicus zinc finger protein 668 (Znf668), mRNA [NM_001107553]                                                                                     | <b>16,628</b> |
| Map6         | Rattus norvegicus microtubule-associated protein 6 (Map6), mRNA [NM_017204]                                                                                 | <b>16,627</b> |
| Abcb9        | Rattus norvegicus ATP-binding cassette, subfamily B (MDR/TAP), member 9 (Abcb9), mRNA [NM_022238]                                                           | <b>16,625</b> |
| 0            | Unknown                                                                                                                                                     | <b>16,624</b> |

|              |                                                                                                                                  |        |
|--------------|----------------------------------------------------------------------------------------------------------------------------------|--------|
| Plp2         | Rattus norvegicus proteolipid protein 2 (colonic epithelium-enriched) (Plp2), mRNA [NM_207601]                                   | 16,623 |
| Lrrc29       | Rattus norvegicus leucine rich repeat containing 29 (Lrrc29), mRNA [NM_001195616]                                                | 16,621 |
| 0            | PREDICTED: Rattus norvegicus mastermind like 2 (Drosophila) (Maml2), mRNA [XM_001072241]                                         | 16,614 |
| Stk38        | Rattus norvegicus serine/threonine kinase 38 (Stk38), mRNA [NM_001015025]                                                        | 16,613 |
| Col18a1      | Rattus norvegicus collagen, type XVIII, alpha 1 (Col18a1), mRNA [NM_053489]                                                      | 16,612 |
| 0            | Unknown                                                                                                                          | 16,610 |
| 0            | Rattus norvegicus RBSC-skeletrophin/dystrophin-like polypeptide (22100081k) mRNA, 22100081k-4E2 allele, complete cds. [AY675183] | 16,601 |
| 0            | Unknown                                                                                                                          | 16,597 |
| LOC100360801 | PREDICTED: Rattus norvegicus mCG11385-like (LOC100360801), mRNA [XM_002728402]                                                   | 16,594 |
| Gdf11        | PREDICTED: Rattus norvegicus growth differentiation factor 11 (Gdf11), mRNA [XM_343148]                                          | 16,593 |
| Asf1a        | Rattus norvegicus ASF1 anti-silencing function 1 homolog A (S. cerevisiae) (Asf1a), mRNA [NM_001106389]                          | 16,587 |
| Kpna1        | Rattus norvegicus karyopherin alpha 1/importin alpha 5 (Kpna1) mRNA, complete cds. [AY351984]                                    | 16,584 |
| 0            | AGENCOURT_31538552 NIH_MGC_270 Rattus norvegicus cDNA clone IMAGE:7442365 5', mRNA sequence [CV107694]                           | 16,583 |
| Tnrc6b       | Rattus norvegicus trinucleotide repeat containing 6B (Tnrc6b), mRNA [NM_138845]                                                  | 16,583 |
| Kab          | Uncharacterized protein [Source:UniProtKB/TrEMBL;Acc:D3ZET9] [ENSRNOT00000005532]                                                | 16,578 |
| Sfxn5        | Rattus norvegicus sideroflexin 5 (Sfxn5), nuclear gene encoding mitochondrial protein, mRNA [NM_153298]                          | 16,578 |
| Phf19        | Rattus norvegicus PHD finger protein 19 (Phf19), mRNA [NM_001106570]                                                             | 16,578 |
| Dazap1       | Rattus norvegicus DAZ associated protein 1 (Dazap1), mRNA [NM_001025742]                                                         | 16,574 |
| 0            | Unknown                                                                                                                          | 16,569 |
| Orai3        | Rattus norvegicus ORAI calcium release-activated calcium modulator 3 (Orai3), mRNA [NM_001014024]                                | 16,567 |
| 0            | Unknown                                                                                                                          | 16,565 |
| 0            | Unknown                                                                                                                          | 16,564 |
| Tppp         | Rattus norvegicus tubulin polymerization promoting protein (Tppp), mRNA [NM_001108461]                                           | 16,560 |
| Olr94        | Rattus norvegicus olfactory receptor 94 (Olr94), mRNA [NM_001001023]                                                             | 16,557 |
| Atp10d       | Uncharacterized protein [Source:UniProtKB/TrEMBL;Acc:D3ZN41] [ENSRNOT00000003146]                                                | 16,557 |
| RGD1306772   | Rattus norvegicus similar to RIKEN cDNA 1110008J03 (RGD1306772), mRNA [NM_001044226]                                             | 16,555 |
| Zbtb9        | Rattus norvegicus zinc finger and BTB domain containing 9 (Zbtb9), mRNA [NM_213564]                                              | 16,553 |
| Frmd8        | Rattus norvegicus FERM domain containing 8 (Frmd8), mRNA [NM_001008348]                                                          | 16,551 |
| Espn         | Rattus norvegicus espin (Espn), mRNA [NM_019622]                                                                                 | 16,549 |
| Anxa2        | Rattus norvegicus annexin A2 (Anxa2), mRNA [NM_019905]                                                                           | 16,548 |
| Crabp1       | Rattus norvegicus cellular retinoic acid binding protein 1 (Crabp1), mRNA [NM_001105716]                                         | 16,548 |
| B3galt1      | Rattus norvegicus UDP-Gal:betaGlcNAc beta 1,3-galactosyltransferase, polypeptide 1 (B3galt1), mRNA [NM_001108954]                | 16,547 |
| Herc3        | Rattus norvegicus hect domain and RLD 3 (Herc3), mRNA [NM_001108631]                                                             | 16,545 |
| Syp          | Synaptophysin [Source:UniProtKB/Swiss-Prot;Acc:P07825] [ENSRNOT00000013724]                                                      | 16,542 |

|              |                                                                                                                                |        |
|--------------|--------------------------------------------------------------------------------------------------------------------------------|--------|
| LOC500227    | Rattus norvegicus hypothetical gene supported by BC079424 (LOC500227), mRNA [NM_001024330]                                     | 16,540 |
| 0            | Productively rearranged V-lambda-2 [Source:UniProtKB/TrEMBL;Acc:A0N4E8] [ENSRNOT00000036565]                                   | 16,539 |
| Tsr2         | Rattus norvegicus TSR2, 20S rRNA accumulation, homolog (S. cerevisiae) (Tsr2), mRNA [NM_001115027]                             | 16,535 |
| 0            | Unknown                                                                                                                        | 16,533 |
| 0            | spectrin beta chain, brain 1 [Source:RefSeq peptide;Acc:NP_001013148] [ENSRNOT00000007441]                                     | 16,531 |
| Plagl1       | Rattus norvegicus pleiomorphic adenoma gene-like 1 (Plagl1), mRNA [NM_012760]                                                  | 16,530 |
| RGD1561931   | Uncharacterized protein [Source:UniProtKB/TrEMBL;Acc:D3ZGX1] [ENSRNOT00000035653]                                              | 16,527 |
| Pla2g3       | Rattus norvegicus phospholipase A2, group III (Pla2g3), mRNA [NM_001106015]                                                    | 16,524 |
| LOC681303    | PREDICTED: Rattus norvegicus similar to tumor endothelial marker 8 isoform 1 precursor (LOC681303), mRNA [XM_002725159]        | 16,519 |
| 0            | Uncharacterized protein [Source:UniProtKB/TrEMBL;Acc:D3ZS91] [ENSRNOT00000041424]                                              | 16,518 |
| Aph1a        | Rattus norvegicus anterior pharynx defective 1 homolog A (C. elegans) (Aph1a), mRNA [NM_001014255]                             | 16,518 |
| Cacnb2       | Rattus norvegicus calcium channel, voltage-dependent, beta 2 subunit (Cacnb2), mRNA [NM_053851]                                | 16,516 |
| Pgpep1       | Rattus norvegicus pyroglutamyl-peptidase I (Pgpep1), mRNA [NM_201988]                                                          | 16,514 |
| Rtn1         | Rattus norvegicus reticulon 1 (Rtn1), mRNA [NM_053865]                                                                         | 16,512 |
| Arpc5l       | Rattus norvegicus actin related protein 2/3 complex, subunit 5-like, mRNA (cDNA clone IMAGE:7377370), complete cds. [BC098820] | 16,512 |
| RGD1310862   | PREDICTED: Rattus norvegicus similar to adult retina protein (RGD1310862), mRNA [XM_001064739]                                 | 16,507 |
| Rhob         | Rattus norvegicus ras homolog gene family, member B (Rhob), mRNA [NM_022542]                                                   | 16,505 |
| Arfgap2      | Rattus norvegicus ADP-ribosylation factor GTPase activating protein 2 (Arfgap2), mRNA [NM_001033707]                           | 16,503 |
| 0            | MUSZFXAA zinc finger protein {Mus musculus} (exp=-1; wgp=0; cg=0), partial (15%) [TC614718]                                    | 16,499 |
| Pxk          | Rattus norvegicus PX domain containing serine/threonine kinase (Pxk), mRNA [NM_182821]                                         | 16,499 |
| Ache         | Rattus norvegicus acetylcholinesterase (Ache), mRNA [NM_172009]                                                                | 16,497 |
| 0            | Unknown                                                                                                                        | 16,492 |
| Tmem192      | Rattus norvegicus transmembrane protein 192 (Tmem192), mRNA [NM_001014141]                                                     | 16,488 |
| Tsg101       | Rattus norvegicus tumor susceptibility gene 101 (Tsg101), mRNA [NM_181628]                                                     | 16,488 |
| Btbd4        | Rattus norvegicus BTB (POZ) domain containing 4 (Btbd4), mRNA [NM_001107808]                                                   | 16,488 |
| Wdr51a       | Rattus norvegicus WD repeat domain 51A (Wdr51a), mRNA [NM_001109296]                                                           | 16,487 |
| Calr         | Rattus norvegicus calreticulin (Calr), mRNA [NM_022399]                                                                        | 16,474 |
| Sgce         | Rattus norvegicus sarcoglycan, epsilon (Sgce), mRNA [NM_001002023]                                                             | 16,473 |
| LOC100364372 | Uncharacterized protein [Source:UniProtKB/TrEMBL;Acc:D3Z844] [ENSRNOT00000058934]                                              | 16,470 |
| 0            | Uncharacterized protein [Source:UniProtKB/TrEMBL;Acc:D3ZFY7] [ENSRNOT00000018667]                                              | 16,468 |
| Syt4         | Rattus norvegicus synaptotagmin IV (Syt4), mRNA [NM_031693]                                                                    | 16,467 |
| Txndc12      | Rattus norvegicus thioredoxin domain containing 12 (endoplasmic reticulum) (Txndc12), mRNA [NM_001100840]                      | 16,465 |
| LOC606294    | Rattus norvegicus hypothetical protein LOC606294 (LOC606294), mRNA [NM_001031627]                                              | 16,463 |
| 0            | Q2ALT1_9BAC1 (Q2ALT1) Erythromycin esterase precursor, partial (5%) [TC641238]                                                 | 16,462 |

|          |                                                                                                                                                                                                                             |               |
|----------|-----------------------------------------------------------------------------------------------------------------------------------------------------------------------------------------------------------------------------|---------------|
| 0        | PREDICTED: Rattus norvegicus similar to SAM and SH3 domain containing protein 1 (Proline-glutamate repeat-containing protein) (RGD1566017), miscRNA [XR_085686]                                                             | <b>16,450</b> |
| 0        | Glyceraldehyde-3-phosphate dehydrogenase [Source:UniProtKB/TrEMBL;Acc:D3ZQ40] [ENSRNOT00000047010]                                                                                                                          | <b>16,448</b> |
| Dpf3     | Rattus norvegicus D4, zinc and double PHD fingers, family 3 (Dpf3), mRNA [NM_001191818]                                                                                                                                     | <b>16,448</b> |
| Scn3a    | Rattus norvegicus sodium channel, voltage-gated, type III, alpha (Scn3a), mRNA [NM_013119]                                                                                                                                  | <b>16,446</b> |
| Gabrq    | Rattus norvegicus gamma-aminobutyric acid (GABA) receptor, theta (Gabrq), mRNA [NM_031733]                                                                                                                                  | <b>16,445</b> |
| Bace1    | Rattus norvegicus beta-site APP cleaving enzyme 1 (Bace1), mRNA [NM_019204]                                                                                                                                                 | <b>16,445</b> |
| 0        | Unknown                                                                                                                                                                                                                     | <b>16,436</b> |
| Sh3d19   | Similar to SH3 domain protein D19 (Predicted)Uncharacterized protein [Source:UniProtKB/TrEMBL;Acc:D3Z8S0] [ENSRNOT00000015802]                                                                                              | <b>16,434</b> |
| 0        | Unknown                                                                                                                                                                                                                     | <b>16,434</b> |
| 0        | Cytochrome c oxidase subunit 1 [Source:UniProtKB/Swiss-Prot;Acc:P05503] [ENSRNOT00000050156]                                                                                                                                | <b>16,429</b> |
| Cdc42ep2 | Rattus norvegicus CDC42 effector protein (Rho GTPase binding) 2 (Cdc42ep2), mRNA [NM_001009689]                                                                                                                             | <b>16,425</b> |
| Setd7    | Rattus norvegicus SET domain containing (lysine methyltransferase) 7 (Setd7), mRNA [NM_001109558]                                                                                                                           | <b>16,424</b> |
| Zfp275   | Rattus norvegicus zinc finger protein 275 (Zfp275), mRNA [NM_001106343]                                                                                                                                                     | <b>16,421</b> |
| 0        | Unknown                                                                                                                                                                                                                     | <b>16,421</b> |
| Bid      | Rattus norvegicus BH3 interacting domain death agonist (Bid), mRNA [NM_022684]                                                                                                                                              | <b>16,419</b> |
| 0        | expressed sequence C86695 Gene [Source:MGI Symbol;Acc:MGI:2142877] [ENSRNOT00000066415]                                                                                                                                     | <b>16,413</b> |
| Cyb5d1   | Rattus norvegicus cytochrome b5 domain containing 1 (Cyb5d1), mRNA [NM_001191890]                                                                                                                                           | <b>16,409</b> |
| Slc17a8  | Rattus norvegicus solute carrier family 17 (sodium-dependent inorganic phosphate cotransporter), member 8 (Slc17a8), mRNA [NM_153725]                                                                                       | <b>16,404</b> |
| Pir      | Rattus norvegicus pirin (iron-binding nuclear protein) (Pir), mRNA [NM_001009474]                                                                                                                                           | <b>16,403</b> |
| Nap111   | Rattus norvegicus nucleosome assembly protein 1-like 1 (Nap111), mRNA [NM_053561]                                                                                                                                           | <b>16,402</b> |
| 0        | Q8BUD8_MOUSE (Q8BUD8) 10 days lactation, adult female mammary gland cDNA, RIKEN full-length enriched library, clone:D730020H24 product:ZINC FINGER PROTEIN homolog (Muscleblind-like 2, isoform 1), partial (9%) [TC592330] | <b>16,399</b> |
| Alkbh6   | Rattus norvegicus alkB, alkylation repair homolog 6 (E. coli) (Alkbh6), mRNA [NM_001127450]                                                                                                                                 | <b>16,397</b> |
| Adck4    | Rattus norvegicus aarF domain containing kinase 4 (Adck4), mRNA [NM_001012065]                                                                                                                                              | <b>16,395</b> |
| Atp2b3   | Rattus norvegicus ATPase, Ca <sup>++</sup> transporting, plasma membrane 3 (Atp2b3), mRNA [NM_133288]                                                                                                                       | <b>16,393</b> |
| 0        | PREDICTED: Rattus norvegicus similar to glycoprotein, synaptic 2 (RGD1560015), mRNA [XM_001062160]                                                                                                                          | <b>16,393</b> |
| Fam176a  | Rattus norvegicus family with sequence similarity 176, member A (Fam176a), mRNA [NM_001109243]                                                                                                                              | <b>16,391</b> |
| Tmed5    | Rattus norvegicus transmembrane emp24 protein transport domain containing 5 (Tmed5), mRNA [NM_001007619]                                                                                                                    | <b>16,391</b> |
| Mobkl1b  | Rattus norvegicus MOB1, Mps One Binder kinase activator-like 1B (yeast) (Mobkl1b), mRNA [NM_001033891]                                                                                                                      | <b>16,386</b> |
| Stk32b   | Rattus norvegicus serine/threonine kinase 32B (Stk32b), mRNA [NM_001107224]                                                                                                                                                 | <b>16,386</b> |
| Olr237   | Rattus norvegicus olfactory receptor 237 (Olr237), mRNA [NM_001000210]                                                                                                                                                      | <b>16,382</b> |
| Dab1     | Rattus norvegicus disabled homolog 1 (Drosophila) (Dab1), mRNA [NM_153621]                                                                                                                                                  | <b>16,380</b> |
| Arfip2   | Rattus norvegicus ADP-ribosylation factor interacting protein 2 (Arfip2), mRNA [NM_001004222]                                                                                                                               | <b>16,378</b> |



|            |                                                                                                                                    |               |
|------------|------------------------------------------------------------------------------------------------------------------------------------|---------------|
| RGD1563581 | PREDICTED: Rattus norvegicus similar to S100 calcium binding protein A11 (calizzarin) (RGD1563581), mRNA [XM_001064539]            | <b>16,377</b> |
| 0          | Unknown                                                                                                                            | <b>16,375</b> |
| Hnrnpul2   | Uncharacterized protein [Source:UniProtKB/TrEMBL;Acc:D4ABT8] [ENSRNOT00000026416]                                                  | <b>16,375</b> |
| 0          | Unknown                                                                                                                            | <b>16,373</b> |
| RGD1562846 | Rattus norvegicus similar to Docking protein 5 (Downstream of tyrosine kinase 5) (Protein dok-5) (RGD1562846), mRNA [NM_001109344] | <b>16,370</b> |
| Vom1r37    | Rattus norvegicus vomeronasal 1 receptor 37 (Vom1r37), mRNA [NM_001008923]                                                         | <b>16,370</b> |
| Ppm1l      | Rattus norvegicus protein phosphatase 1 (formerly 2C)-like (Ppm1l), mRNA [NM_001107681]                                            | <b>16,366</b> |
| Mtmr4      | Rattus norvegicus myotubularin related protein 4 (Mtmr4), mRNA [NM_001105827]                                                      | <b>16,364</b> |
| Tollip     | Rattus norvegicus toll interacting protein (Tollip), mRNA [NM_001109668]                                                           | <b>16,358</b> |
| RGD1561563 | PREDICTED: Rattus norvegicus similar to RIKEN cDNA 1700013B16 (RGD1561563), mRNA [XM_001066615]                                    | <b>16,357</b> |
| Rad52      | Rattus norvegicus RAD52 homolog (S. cerevisiae) (Rad52), mRNA [NM_001106617]                                                       | <b>16,352</b> |
| RGD1564019 | PREDICTED: Rattus norvegicus similar to GTPase activating RANGAP domain-like 3 (RGD1564019), mRNA [XM_001078585]                   | <b>16,348</b> |
| LOC690398  | PREDICTED: Rattus norvegicus hypothetical protein LOC690398 (LOC690398), mRNA [XM_001074336]                                       | <b>16,345</b> |
| 0          | Uncharacterized protein [Source:UniProtKB/TrEMBL;Acc:D3ZME9] [ENSRNOT00000056797]                                                  | <b>16,340</b> |
| Timd2      | Rattus norvegicus T-cell immunoglobulin and mucin domain containing 2 (Timd2), mRNA [NM_001013855]                                 | <b>16,337</b> |
| Sdc1       | Rattus norvegicus syndecan 1 (Sdc1), mRNA [NM_013026]                                                                              | <b>16,337</b> |
| Rbm4       | Rattus norvegicus RNA binding motif protein 4 (Rbm4), mRNA [NM_001170484]                                                          | <b>16,335</b> |
| Stxbp5l    | Uncharacterized protein [Source:UniProtKB/TrEMBL;Acc:D3ZDG1] [ENSRNOT00000041715]                                                  | <b>16,335</b> |
| Terf2      | Rattus norvegicus telomeric repeat binding factor 2 (Terf2), mRNA [NM_001108448]                                                   | <b>16,334</b> |
| 0          | AF155065 brain protein {Homo sapiens} (exp=-1; wgp=0; cg=0), partial (12%) [TC626613]                                              | <b>16,330</b> |
| Snx18      | Rattus norvegicus sorting nexin 18 (Snx18), mRNA [NM_001107652]                                                                    | <b>16,329</b> |
| Ergic3     | Rattus norvegicus ERGIC and golgi 3 (Ergic3), mRNA [NM_001106533]                                                                  | <b>16,328</b> |
| 0          | Unknown                                                                                                                            | <b>16,320</b> |
| Napepld    | Rattus norvegicus N-acyl phosphatidylethanolamine phospholipase D (Napepld), mRNA [NM_199381]                                      | <b>16,314</b> |
| Afap1l2    | PREDICTED: Rattus norvegicus actin filament associated protein 1-like 2 (Afap1l2), partial mRNA [XM_001064140]                     | <b>16,310</b> |
| 0          | Q3X9T6_METFL (Q3X9T6) CDP-diacylglycerol--serine O-phosphatidyltransferase , partial (6%) [TC628492]                               | <b>16,307</b> |
| Cux1       | Homeobox protein cut-like 1 [Source:UniProtKB/Swiss-Prot;Acc:P53565] [ENSRNOT00000001928]                                          | <b>16,306</b> |
| Larp1      | PREDICTED: Rattus norvegicus La ribonucleoprotein domain family, member 1 (Larp1), partial mRNA [XM_001075150]                     | <b>16,305</b> |
| Itgb3bp    | Rattus norvegicus integrin beta 3 binding protein (beta3-endonexin) (Itgb3bp), mRNA [NM_001013213]                                 | <b>16,301</b> |
| Dnajc18    | Rattus norvegicus DnaJ (Hsp40) homolog, subfamily C, member 18 (Dnajc18), mRNA [NM_001013887]                                      | <b>16,300</b> |
| Aldh3a1    | Rattus norvegicus aldehyde dehydrogenase 3 family, member A1 (Aldh3a1), mRNA [NM_031972]                                           | <b>16,294</b> |
| Lrrc37a    | PREDICTED: Rattus norvegicus leucine rich repeat containing 37, member A3 (Lrrc37a3), mRNA [XM_220928]                             | <b>16,293</b> |
| Plec       | Rattus norvegicus plectin (Plec), transcript variant 6, mRNA [NM_022401]                                                           | <b>16,291</b> |
| 0          | Unknown                                                                                                                            | <b>16,290</b> |

|            |                                                                                                                                             |        |
|------------|---------------------------------------------------------------------------------------------------------------------------------------------|--------|
| H1f0       | Rattus norvegicus H1 histone family, member 0 (H1f0), mRNA [NM_012578]                                                                      | 16,286 |
| Txn2       | Rattus norvegicus thioredoxin 2 (Txn2), nuclear gene encoding mitochondrial protein, mRNA [NM_053331]                                       | 16,285 |
| Nlgn1      | Rattus norvegicus neuroligin 1 (Nlgn1), mRNA [NM_053868]                                                                                    | 16,284 |
| Zfyve20    | Rattus norvegicus zinc finger, FYVE domain containing 20 (Zfyve20), mRNA [NM_001107875]                                                     | 16,284 |
| Hipk2      | Rattus norvegicus homeodomain interacting protein kinase 2 (Hipk2), mRNA [NM_001108622]                                                     | 16,282 |
| RGD1562342 | Rattus norvegicus similar to RIKEN cDNA 1110012D08 (RGD1562342), mRNA [NM_001109281]                                                        | 16,276 |
| Ecop       | Rattus norvegicus EGFR-coamplified and overexpressed protein (Ecop), mRNA [NM_001108630]                                                    | 16,274 |
| Snapc5     | Rattus norvegicus small nuclear RNA activating complex, polypeptide 5 (Snapc5), mRNA [NM_001109643]                                         | 16,271 |
| 0          | Uncharacterized protein [Source:UniProtKB/TrEMBL;Acc:D4A7E5] [ENSRNOT00000023364]                                                           | 16,270 |
| Opn1mw     | Rattus norvegicus opsin 1 (cone pigments), medium-wave-sensitive (Opn1mw), mRNA [NM_053548]                                                 | 16,267 |
| 0          | Unknown                                                                                                                                     | 16,267 |
| Rnf165     | Rattus norvegicus ring finger protein 165 (Rnf165), mRNA [NM_001164505]                                                                     | 16,266 |
| Lypd1      | Rattus norvegicus Ly6/Plaur domain containing 1 (Lypd1), mRNA [NM_001007727]                                                                | 16,263 |
| St6gal1    | Rattus norvegicus ST6 beta-galactosamide alpha-2,6-sialyltransferase 1 (St6gal1), transcript variant 2, mRNA [NM_147205]                    | 16,262 |
| Tceb2      | Rattus norvegicus transcription elongation factor B (SIII), polypeptide 2 (Tceb2), mRNA [NM_031129]                                         | 16,262 |
| Prrc1      | Rattus norvegicus proline-rich coiled-coil 1 (Prrc1), mRNA [NM_001033887]                                                                   | 16,260 |
| Gk         | Rattus norvegicus glycerol kinase (Gk), mRNA [NM_024381]                                                                                    | 16,252 |
| Mapk8      | Mitogen-activated protein kinase 8 [Source:UniProtKB/Swiss-Prot;Acc:P49185] [ENSRNOT00000027338]                                            | 16,249 |
| 0          | Uncharacterized protein [Source:UniProtKB/TrEMBL;Acc:D3ZMT2] [ENSRNOT00000044934]                                                           | 16,248 |
| Rcc2       | PREDICTED: Rattus norvegicus regulator of chromosome condensation 2 (Rcc2), mRNA [XM_216557]                                                | 16,247 |
| Nat8l      | Rattus norvegicus N-acetyltransferase 8-like (Nat8l), mRNA [NM_001191681]                                                                   | 16,247 |
| Thoc4      | Rattus norvegicus THO complex 4 (Thoc4), mRNA [NM_001109602]                                                                                | 16,245 |
| Ankhd1     | Rattus norvegicus ankyrin repeat and KH domain containing 1 (Ankhd1), mRNA [NM_001204053]                                                   | 16,241 |
| Med13      | Rattus norvegicus mediator complex subunit 13 (Med13), mRNA [NM_001107035]                                                                  | 16,239 |
| Slc35e3    | Rattus norvegicus solute carrier family 35, member E3 (Slc35e3), mRNA [NM_001134687]                                                        | 16,238 |
| Dapk2      | Rattus norvegicus death-associated kinase 2 (Dapk2), mRNA [NM_001013109]                                                                    | 16,236 |
| 0          | AGENCOURT_31541565 NIH_MGC_270 Rattus norvegicus cDNA clone IMAGE:7444018 5', mRNA sequence [CV110972]                                      | 16,235 |
| 0          | Unknown                                                                                                                                     | 16,234 |
| Large      | Rattus norvegicus like-glycosyltransferase (Large), mRNA [NM_001108439]                                                                     | 16,234 |
| MGC94190   | Rattus norvegicus similar to 0610007L01Rik protein (MGC94190), mRNA [NM_001004204]                                                          | 16,232 |
| 0          | Rattus norvegicus similar to glyceraldehyde-3-phosphate dehydrogenase (phosphorylating) (EC 1.2.1.12) - mouse (LOC302722), mRNA [XM_228999] | 16,231 |
| Ptpn1      | Tyrosine-protein phosphatase non-receptor type 1 [Source:UniProtKB/Swiss-Prot;Acc:P20417] [ENSRNOT00000014309]                              | 16,229 |
| Invs       | Rattus norvegicus inversin (Invs), mRNA [NM_001107932]                                                                                      | 16,229 |

|            |                                                                                                                                                |               |
|------------|------------------------------------------------------------------------------------------------------------------------------------------------|---------------|
| Hras       | Rattus norvegicus Harvey rat sarcoma virus oncogene (Hras), transcript variant 2, mRNA [NM_001098241]                                          | <b>16,227</b> |
| Rasgrf2    | Rattus norvegicus RAS protein-specific guanine nucleotide-releasing factor 2 (Rasgrf2), mRNA [NM_053721]                                       | <b>16,226</b> |
| Gstt2      | Rattus norvegicus glutathione S-transferase, theta 2 (Gstt2), mRNA [NM_012796]                                                                 | <b>16,224</b> |
| LOC686781  | PREDICTED: Rattus norvegicus similar to NFkB interacting protein 1 (LOC686781), mRNA [XM_001075705]                                            | <b>16,224</b> |
| Lrrc4c     | Rattus norvegicus leucine rich repeat containing 4C (Lrrc4c), mRNA [NM_001107753]                                                              | <b>16,221</b> |
| Fam65b     | Rattus norvegicus family with sequence similarity 65, member B (Fam65b), mRNA [NM_001014009]                                                   | <b>16,221</b> |
| Prex2      | Rattus norvegicus phosphatidylinositol-3,4,5-trisphosphate-dependent Rac exchange factor 2 (Prex2), mRNA [NM_001107899]                        | <b>16,219</b> |
| Mreg       | Rattus norvegicus melanoregulin (Mreg), mRNA [NM_001192002]                                                                                    | <b>16,218</b> |
| LOC690478  | Rattus norvegicus similar to keratin associated protein 10-7 (LOC690478), mRNA [NM_001109595]                                                  | <b>16,216</b> |
| Lpin2      | Rattus norvegicus lipin 2 (Lpin2), mRNA [NM_001108236]                                                                                         | <b>16,212</b> |
| Abi1       | Rattus norvegicus abl-interactor 1 (Abi1), mRNA [NM_024397]                                                                                    | <b>16,210</b> |
| Galnt2     | Rattus norvegicus UDP-N-acetyl-alpha-D-galactosamine:polypeptide N-acetylgalactosaminyltransferase 2 (GalNAc-T2) (Galnt2), mRNA [NM_001106196] | <b>16,208</b> |
| Rad18      | Rattus norvegicus RAD18 homolog (S. cerevisiae) (Rad18), mRNA [NM_001077673]                                                                   | <b>16,205</b> |
| RGD1306119 | Rattus norvegicus similar to transcriptional regulating protein 132 (RGD1306119), mRNA [NM_001169116]                                          | <b>16,203</b> |
| 0          | Unknown                                                                                                                                        | <b>16,201</b> |
| Suv39h1    | Rattus norvegicus suppressor of variegation 3-9 homolog 1 (Drosophila) (Suv39h1), mRNA [NM_001106956]                                          | <b>16,199</b> |
| Zdhhc22    | Rattus norvegicus zinc finger, DHHC-type containing 22 (Zdhhc22), mRNA [NM_001039325]                                                          | <b>16,197</b> |
| 0          | Unknown                                                                                                                                        | <b>16,197</b> |
| Gramd1b    | Rattus norvegicus GRAM domain containing 1B (Gramd1b), mRNA [NM_001191616]                                                                     | <b>16,197</b> |
| RGD1307041 | Rattus norvegicus similar to hypothetical protein FLJ11305 (RGD1307041), mRNA [NM_001169144]                                                   | <b>16,196</b> |
| 0          | Unknown                                                                                                                                        | <b>16,190</b> |
| Sgcz       | Rattus norvegicus sarcoglycan zeta (Sgcz), mRNA [NM_001108875]                                                                                 | <b>16,188</b> |
| 0          | Ras-related protein Rab-6A [Source:UniProtKB/Swiss-Prot;Acc:Q9WVB1] [ENSRNOT00000025104]                                                       | <b>16,186</b> |
| 0          | Ankyrin repeat and sterile alpha motif domain-containing protein 1B [Source:UniProtKB/Swiss-Prot;Acc:P0C6S7] [ENSRNOT00000038501]              | <b>16,182</b> |
| Znf23      | Rattus norvegicus zinc finger protein 23 (KOX 16) (Znf23), mRNA [NM_001107428]                                                                 | <b>16,179</b> |
| Prkcb      | Rattus norvegicus protein kinase C, beta (Prkcb), transcript variant 2, mRNA [NM_001172305]                                                    | <b>16,174</b> |
| Ubox5      | Rattus norvegicus U-box domain containing 5 (Ubox5), mRNA [NM_001033997]                                                                       | <b>16,174</b> |
| Kcnn3      | Rattus norvegicus potassium intermediate/small conductance calcium-activated channel, subfamily N, member 3 (Kcnn3), mRNA [NM_019315]          | <b>16,172</b> |
| LOC312502  | PREDICTED: Rattus norvegicus similar to RAB11 family interacting protein 5 (class I) isoform 1 (LOC312502), miscRNA [XR_085818]                | <b>16,168</b> |
| 0          | Uncharacterized protein [Source:UniProtKB/TrEMBL;Acc:D3ZP11] [ENSRNOT00000032583]                                                              | <b>16,168</b> |
| Irgq       | Rattus norvegicus immunity-related GTPase family, Q (Irgq), mRNA [NM_001135742]                                                                | <b>16,164</b> |
| 0          | Q6ZPJ1_MOUSE (Q6ZPJ1) MKIAA1736 protein (Fragment), partial (21%) [TC624205]                                                                   | <b>16,164</b> |
| Ppm1f      | Rattus norvegicus protein phosphatase 1F (PP2C domain containing) (Ppm1f), mRNA [NM_175755]                                                    | <b>16,160</b> |

|            |                                                                                                           |               |
|------------|-----------------------------------------------------------------------------------------------------------|---------------|
| Stat3      | Rattus norvegicus signal transducer and activator of transcription 3 (Stat3), mRNA [NM_012747]            | <b>16,160</b> |
| RGD1559513 | Uncharacterized protein [Source:UniProtKB/TrEMBL;Acc:D4ADJ9] [ENSRNOT00000033492]                         | <b>16,159</b> |
| Tcea2      | Rattus norvegicus transcription elongation factor A (SII), 2 (Tcea2), mRNA [NM_057098]                    | <b>16,157</b> |
| Vipr2      | Rattus norvegicus vasoactive intestinal peptide receptor 2 (Vipr2), mRNA [NM_017238]                      | <b>16,156</b> |
| Fnbp4      | Rattus norvegicus formin binding protein 4 (Fnbp4), mRNA [NM_001013159]                                   | <b>16,148</b> |
| U2af114    | Rattus norvegicus U2 small nuclear RNA auxiliary factor 1-like 4 (U2af114), mRNA [NM_001008775]           | <b>16,147</b> |
| Fam20b     | Rattus norvegicus family with sequence similarity 20, member B (Fam20b), mRNA [NM_001107187]              | <b>16,147</b> |
| Ezh1       | Rattus norvegicus enhancer of zeste homolog 1 (Drosophila) (Ezh1), mRNA [NM_001107051]                    | <b>16,145</b> |
| Lhb        | Rattus norvegicus luteinizing hormone beta (Lhb), transcript variant 1, mRNA [NM_012858]                  | <b>16,145</b> |
| Ramp2      | Rattus norvegicus receptor (G protein-coupled) activity modifying protein 2 (Ramp2), mRNA [NM_031646]     | <b>16,144</b> |
| Agpat3     | Rattus norvegicus 1-acylglycerol-3-phosphate O-acyltransferase 3 (Agpat3), mRNA [NM_001106378]            | <b>16,142</b> |
| Msl1       | Rattus norvegicus male-specific lethal 1 homolog (Drosophila) (Msl1), mRNA [NM_001107048]                 | <b>16,141</b> |
| Hdhd3      | Rattus norvegicus haloacid dehalogenase-like hydrolase domain containing 3 (Hdhd3), mRNA [NM_001109511]   | <b>16,139</b> |
| 0          | Uncharacterized protein [Source:UniProtKB/TrEMBL;Acc:D3Z9Y5] [ENSRNOT00000044331]                         | <b>16,137</b> |
| Rtn2       | Rattus norvegicus reticulon 2 (Rtn2), mRNA [NM_201562]                                                    | <b>16,136</b> |
| Trim8      | Rattus norvegicus tripartite motif-containing 8 (Trim8), mRNA [NM_001128083]                              | <b>16,135</b> |
| Pde5a      | Rattus norvegicus phosphodiesterase 5A, cGMP-specific (Pde5a), mRNA [NM_133584]                           | <b>16,135</b> |
| Ccnd2      | Rattus norvegicus cyclin D2 (Ccnd2), mRNA [NM_022267]                                                     | <b>16,134</b> |
| 0          | Unknown                                                                                                   | <b>16,133</b> |
| Wnt7b      | Rattus norvegicus wingless-type MMTV integration site family, member 7B (Wnt7b), mRNA [NM_001009695]      | <b>16,132</b> |
| Map3k13    | Rattus norvegicus mitogen-activated protein kinase kinase kinase 13 (Map3k13), mRNA [NM_001013978]        | <b>16,127</b> |
| Pglyrp4    | Rattus norvegicus peptidoglycan recognition protein 4 (Pglyrp4), mRNA [NM_001191708]                      | <b>16,125</b> |
| Grb7       | Rattus norvegicus growth factor receptor bound protein 7 (Grb7), mRNA [NM_053403]                         | <b>16,121</b> |
| 0          | Uncharacterized protein [Source:UniProtKB/TrEMBL;Acc:D3ZD87] [ENSRNOT00000046906]                         | <b>16,121</b> |
| 0          | Unknown                                                                                                   | <b>16,119</b> |
| 0          | Unknown                                                                                                   | <b>16,117</b> |
| 0          | BC052456 Fcho2 {Mus musculus} (exp=-1; wgp=0; cg=0), partial (11%) [TC610872]                             | <b>16,114</b> |
| Fam155a    | PREDICTED: Rattus norvegicus family with sequence similarity 155, member A (Fam155a), mRNA [XM_001076507] | <b>16,109</b> |
| 0          | Unknown                                                                                                   | <b>16,103</b> |
| Cplx3      | Rattus norvegicus complexin 3 (Cplx3), mRNA [NM_001109295]                                                | <b>16,101</b> |
| Nfya       | Rattus norvegicus nuclear transcription factor-Y alpha (Nfya), mRNA [NM_012865]                           | <b>16,100</b> |
| Tmem170b   | Rattus norvegicus transmembrane protein 170B (Tmem170b), mRNA [NM_001008774]                              | <b>16,097</b> |
| LOC360479  | Rattus norvegicus similar to hypothetical protein (LOC360479), mRNA [NM_001014115]                        | <b>16,091</b> |

|            |                                                                                                                                                 |               |
|------------|-------------------------------------------------------------------------------------------------------------------------------------------------|---------------|
| 0          | PREDICTED: Rattus norvegicus similar to RNA binding protein gene with multiple splicing, transcript variant 2 (RGD1561067), mRNA [XM_001059526] | <b>16,090</b> |
| 0          | Myeloid/lymphoid or mixed-lineage leukemia (Mapped)Uncharacterized protein [Source:UniProtKB/TrEMBL;Acc:D3ZLI0] [ENSRNOT00000040881]            | <b>16,090</b> |
| Car9       | Rattus norvegicus carbonic anhydrase 9 (Car9), mRNA [NM_001107956]                                                                              | <b>16,088</b> |
| Ctu1       | Rattus norvegicus cytosolic thiouridylase subunit 1 homolog (S. pombe) (Ctu1), mRNA [NM_001106251]                                              | <b>16,084</b> |
| Ankrd34b   | Rattus norvegicus ankyrin repeat domain 34B (Ankrd34b), mRNA [NM_001109174]                                                                     | <b>16,082</b> |
| Rgs8       | Rattus norvegicus regulator of G-protein signaling 8 (Rgs8), mRNA [NM_019344]                                                                   | <b>16,075</b> |
| Papolb     | Rattus norvegicus poly (A) polymerase beta (testis specific) (Papolb), mRNA [NM_001012020]                                                      | <b>16,074</b> |
| Zc3h14     | Rattus norvegicus zinc finger CCCH type containing 14 (Zc3h14), transcript variant 1, mRNA [NM_001033951]                                       | <b>16,073</b> |
| Mfhas1     | Rattus norvegicus malignant fibrous histiocytoma amplified sequence 1 (Mfhas1), mRNA [NM_001107316]                                             | <b>16,071</b> |
| Ppm1k      | Rattus norvegicus protein phosphatase 1K (PP2C domain containing) (Ppm1k), nuclear gene encoding mitochondrial protein, mRNA [NM_001107863]     | <b>16,066</b> |
| Sh2d3c     | Rattus norvegicus SH2 domain containing 3C (Sh2d3c), mRNA [NM_001108579]                                                                        | <b>16,066</b> |
| Rbm33      | Rattus norvegicus TL0AAA88YH13 mRNA sequence. [FQ211558]                                                                                        | <b>16,064</b> |
| Suv39h1    | Rattus norvegicus suppressor of variegation 3-9 homolog 1 (Drosophila) (Suv39h1), mRNA [NM_001106956]                                           | <b>16,058</b> |
| Ttc13      | Rattus norvegicus tetratricopeptide repeat domain 13 (Ttc13), mRNA [NM_001136162]                                                               | <b>16,057</b> |
| Map2k6     | Rattus norvegicus mitogen-activated protein kinase kinase 6 (Map2k6), mRNA [NM_053703]                                                          | <b>16,056</b> |
| Thsd1      | Rattus norvegicus thrombospondin, type I, domain containing 1 (Thsd1), mRNA [NM_001108878]                                                      | <b>16,055</b> |
| Qser1      | Rattus norvegicus glutamine and serine rich 1 (Qser1), mRNA [NM_001139493]                                                                      | <b>16,055</b> |
| 0          | AGENCOURT_31530923 NIH_MGC_270 Rattus norvegicus cDNA clone IMAGE:7445488 5', mRNA sequence [CV108834]                                          | <b>16,053</b> |
| Pppde1     | Rattus norvegicus PPPDE peptidase domain containing 1 (Pppde1), mRNA [NM_001013873]                                                             | <b>16,050</b> |
| RGD1305422 | PREDICTED: Rattus norvegicus similar to mKIAA0226 protein, transcript variant 2 (RGD1305422), mRNA [XM_002724728]                               | <b>16,050</b> |
| Adora2a    | Rattus norvegicus adenosine A2a receptor (Adora2a), mRNA [NM_053294]                                                                            | <b>16,048</b> |
| Glt25d2    | Uncharacterized protein [Source:UniProtKB/TrEMBL;Acc:D3Z9Z7] [ENSRNOT00000030109]                                                               | <b>16,047</b> |
| Olr1400    | Rattus norvegicus olfactory receptor 1400 (Olr1400), mRNA [NM_001001096]                                                                        | <b>16,047</b> |
| Abcc1      | Rattus norvegicus ATP-binding cassette, subfamily C (CFTR/MRP), member 1 (Abcc1), mRNA [NM_022281]                                              | <b>16,045</b> |
| 0          | Unknown                                                                                                                                         | <b>16,043</b> |
| Perp       | Rattus norvegicus PERP, TP53 apoptosis effector (Perp), mRNA [NM_001106265]                                                                     | <b>16,039</b> |
| Parp6      | Rattus norvegicus poly (ADP-ribose) polymerase family, member 6 (Parp6), mRNA [NM_001106828]                                                    | <b>16,031</b> |
| Rab4b      | Rattus norvegicus RAB4B, member RAS oncogene family (Rab4b), mRNA [NM_017355]                                                                   | <b>16,030</b> |
| 0          | Unknown                                                                                                                                         | <b>16,030</b> |
| LOC691632  | PREDICTED: Rattus norvegicus similar to MIC2 like 1 (LOC691632), mRNA [XM_001079095]                                                            | <b>16,027</b> |
| RGD1307439 | Rattus norvegicus similar to hypothetical protein MGC35138 (RGD1307439), mRNA [NM_001127540]                                                    | <b>16,025</b> |
| Lats2      | Rattus norvegicus large tumor suppressor 2 (Lats2), mRNA [NM_001107267]                                                                         | <b>16,021</b> |

|            |                                                                                                                                   |        |
|------------|-----------------------------------------------------------------------------------------------------------------------------------|--------|
| Setdb1     | Uncharacterized protein [Source:UniProtKB/TrEMBL;Acc:D3ZIW7] [ENSRNOT00000028709]                                                 | 16,019 |
| Rap1a      | Rattus norvegicus RAP1A, member of RAS oncogene family (Rap1a), mRNA [NM_001005765]                                               | 16,016 |
| Vom2r18    | Rattus norvegicus vomeronasal 2 receptor, 18 (Vom2r18), mRNA [NM_173318]                                                          | 16,016 |
| Pias1      | Rattus norvegicus protein inhibitor of activated STAT, 1 (Pias1), mRNA [NM_001106829]                                             | 16,016 |
| RGD1564018 | Uncharacterized protein [Source:UniProtKB/TrEMBL;Acc:D4A328] [ENSRNOT00000011092]                                                 | 16,014 |
| RGD1306151 | Rattus norvegicus similar to hypothetical protein DKFZp761D0211 (RGD1306151), mRNA [NM_001108652]                                 | 16,013 |
| Atp9b      | Rattus norvegicus ATPase, class II, type 9B (Atp9b), mRNA [NM_001106130]                                                          | 16,013 |
| Nefh       | Rattus norvegicus neurofilament, heavy polypeptide (Nefh), mRNA [NM_012607]                                                       | 16,010 |
| Wnt3a      | PREDICTED: Rattus norvegicus wingless-type MMTV integration site family, member 3A (Wnt3a), mRNA [XM_220546]                      | 16,008 |
| Impdh1     | Rattus norvegicus IMP (inosine monophosphate) dehydrogenase 1 (Impdh1), mRNA [NM_001108619]                                       | 16,006 |
| Dlg2       | Rattus norvegicus discs, large homolog 2 (Drosophila) (Dlg2), mRNA [NM_022282]                                                    | 16,001 |
| Degs1      | Rattus norvegicus degenerative spermatocyte homolog 1, lipid desaturase (Drosophila) (Degs1), mRNA [NM_053323]                    | 15,989 |
| Smad6      | Rattus norvegicus SMAD family member 6 (Smad6), mRNA [NM_001109002]                                                               | 15,988 |
| Kctd15     | Rattus norvegicus potassium channel tetramerisation domain containing 15 (Kctd15), mRNA [NM_001109141]                            | 15,986 |
| Phf11      | Rattus norvegicus PHD finger protein 11 (Phf11), mRNA [NM_001024272]                                                              | 15,985 |
| 0          | RCG32422, isoform CRA_aUncharacterized protein [Source:UniProtKB/TrEMBL;Acc:D4ABM7] [ENSRNOT00000021070]                          | 15,984 |
| Hps5       | Rattus norvegicus Hermansky-Pudlak syndrome 5 (Hps5), mRNA [NM_001135612]                                                         | 15,981 |
| Crk        | Rattus norvegicus v-crk sarcoma virus CT10 oncogene homolog (avian) (Crk), mRNA [NM_019302]                                       | 15,976 |
| Kbtbd3     | Rattus norvegicus kelch repeat and BTB (POZ) domain containing 3 (Kbtbd3), mRNA [NM_001108121]                                    | 15,975 |
| Tgs1       | Rattus norvegicus trimethylguanosine synthase homolog (S. cerevisiae) (Tgs1), mRNA [NM_001107904]                                 | 15,975 |
| 0          | Unknown                                                                                                                           | 15,972 |
| RGD1564031 | PREDICTED: Rattus norvegicus similar to transcription elongation factor B (SIII), polypeptide 2 (RGD1564031), mRNA [XM_001081217] | 15,970 |
| Lrrc26     | Rattus norvegicus leucine rich repeat containing 26 (Lrrc26), mRNA [NM_001014053]                                                 | 15,969 |
| Adarb2     | Rattus norvegicus adenosine deaminase, RNA-specific, B2 (Adarb2), mRNA [NM_133302]                                                | 15,969 |
| Lpar2      | Rattus norvegicus lysophosphatidic acid receptor 2 (Lpar2), mRNA [NM_001109109]                                                   | 15,968 |
| Glud1      | Rattus norvegicus glutamate dehydrogenase 1 (Glud1), nuclear gene encoding mitochondrial protein, mRNA [NM_012570]                | 15,968 |
| Cyp4f5     | Rattus norvegicus cytochrome P450, family 4, subfamily f, polypeptide 5 (Cyp4f5), mRNA [NM_173124]                                | 15,968 |
| 0          | PREDICTED: Rattus norvegicus similar to KIAA1447 protein (RGD1306500), mRNA [XM_001081783]                                        | 15,966 |
| Dkk1       | Rattus norvegicus dickkopf-like 1 (Dkk1), mRNA [NM_001109145]                                                                     | 15,965 |
| RGD1559808 | Uncharacterized protein [Source:UniProtKB/TrEMBL;Acc:D4AEB9] [ENSRNOT00000045419]                                                 | 15,963 |
| Sec23a     | Rattus norvegicus Sec23 homolog A (S. cerevisiae) (Sec23a), mRNA [NM_001105732]                                                   | 15,961 |
| Nxph3      | Rattus norvegicus neurexophilin 3 (Nxph3), mRNA [NM_021679]                                                                       | 15,958 |
| LOC687090  | Rattus norvegicus hypothetical protein LOC687090 (LOC687090), mRNA [NM_001110318]                                                 | 15,954 |
| Slc35b2    | Rattus norvegicus solute carrier family 35, member B2 (Slc35b2), mRNA [NM_001037215]                                              | 15,952 |

|            |                                                                                                                                                     |        |
|------------|-----------------------------------------------------------------------------------------------------------------------------------------------------|--------|
| Ptpn9      | Rattus norvegicus protein tyrosine phosphatase, non-receptor type 9 (Ptpn9), mRNA [NM_001013040]                                                    | 15,950 |
| Arsg       | Rattus norvegicus arylsulfatase G (Arsg), mRNA [NM_001047877]                                                                                       | 15,948 |
| Usp9x      | Rattus norvegicus ubiquitin specific peptidase 9, X-linked (Usp9x), transcript variant 2, mRNA [NM_001135923]                                       | 15,948 |
| 42248      | Rattus norvegicus selenoprotein 15 (Sep15), mRNA [NM_133297]                                                                                        | 15,942 |
| Klhl26     | Rattus norvegicus kelch-like 26 (Drosophila) (Klhl26), mRNA [NM_001106075]                                                                          | 15,941 |
| Adamts9    | Rattus norvegicus a disintegrin-like and metalloprotease (reprolysin type) with thrombospondin type 1 motif, 9 (Adamts9), mRNA [NM_001107877]       | 15,927 |
| Pigy       | Rattus norvegicus phosphatidylinositol glycan anchor biosynthesis, class Y (Pigy), nuclear gene encoding mitochondrial protein, mRNA [NM_001024370] | 15,925 |
| Maoa       | Rattus norvegicus monoamine oxidase A (Maoa), nuclear gene encoding mitochondrial protein, mRNA [NM_033653]                                         | 15,924 |
| Plcb1      | Rattus norvegicus phospholipase C, beta 1 (phosphoinositide-specific) (Plcb1), mRNA [NM_001077641]                                                  | 15,924 |
| Cdr2l      | Similar to paraneoplastic antigen (Predicted)Uncharacterized protein [Source:UniProtKB/TrEMBL;Acc:D4ABP3] [ENSRNOT00000035865]                      | 15,924 |
| Prss32     | Rattus norvegicus protease, serine, 32 (Prss32), mRNA [NM_001106983]                                                                                | 15,921 |
| Rfk        | Rattus norvegicus riboflavin kinase (Rfk), mRNA [NM_001014106]                                                                                      | 15,920 |
| Olr1341    | Rattus norvegicus olfactory receptor 1341 (Olr1341), mRNA [NM_001000482]                                                                            | 15,912 |
| Gpr135     | Rattus norvegicus G protein-coupled receptor 135 (Gpr135), mRNA [NM_181771]                                                                         | 15,910 |
| Zfp422     | Rattus norvegicus zinc finger protein 422 (Zfp422), mRNA [NM_001012745]                                                                             | 15,909 |
| Map4k1     | Rattus norvegicus mitogen activated protein kinase kinase kinase kinase 1 (Map4k1), mRNA [NM_001106243]                                             | 15,908 |
| 0          | PREDICTED: Rattus norvegicus similar to olfactory receptor Olr1374 (LOC690140), mRNA [XM_001073432]                                                 | 15,904 |
| Wnt7a      | Rattus norvegicus wingless-type MMTV integration site family, member 7A (Wnt7a), mRNA [NM_001100473]                                                | 15,903 |
| Suv420h2   | Rattus norvegicus suppressor of variegation 4-20 homolog 2 (Drosophila) (Suv420h2), mRNA [NM_001107475]                                             | 15,902 |
| 0          | Unknown                                                                                                                                             | 15,901 |
| LOC690311  | PREDICTED: Rattus norvegicus similar to Alpha-1-antitrypsin-related protein precursor (LOC690311), mRNA [XM_001074053]                              | 15,898 |
| Gimap1     | Rattus norvegicus GTPase, IMAP family member 1 (Gimap1), mRNA [NM_001034849]                                                                        | 15,897 |
| 0          | SRY-box containing gene 5 Gene [Source:MGI Symbol;Acc:MGI:98367] [ENSRNOT00000020729]                                                               | 15,894 |
| RGD1562211 | Rattus norvegicus similar to ubiquitin specific protease 51 (RGD1562211), mRNA [NM_001108252]                                                       | 15,893 |
| Wdr25l     | Rattus norvegicus WD repeat domain 25-like (Wdr25l), mRNA [NM_001135894]                                                                            | 15,891 |
| 0          | Uncharacterized protein [Source:UniProtKB/TrEMBL;Acc:D3ZKG2] [ENSRNOT00000043675]                                                                   | 15,889 |
| RGD1562618 | Rattus norvegicus similar to RIKEN cDNA 6030419C18 gene (RGD1562618), mRNA [NM_001113791]                                                           | 15,886 |
| Polk       | Rattus norvegicus polymerase (DNA directed) kappa (Polk), mRNA [NM_138516]                                                                          | 15,886 |
| Zc3h14     | Rattus norvegicus zinc finger CCCH type containing 14 (Zc3h14), transcript variant 2, mRNA [NM_138920]                                              | 15,885 |
| Tmem132e   | Rattus norvegicus transmembrane protein 132E (Tmem132e), mRNA [NM_001134410]                                                                        | 15,884 |
| 0          | PREDICTED: Rattus norvegicus similar to DUB-1 (RGD1562061), mRNA [XM_219062]                                                                        | 15,878 |
| Rasa3      | Rattus norvegicus RAS p21 protein activator 3 (Rasa3), mRNA [NM_031574]                                                                             | 15,878 |
| Dtx3       | Rattus norvegicus deltex homolog 3 (Drosophila) (Dtx3), mRNA [NM_001191989]                                                                         | 15,874 |

|            |                                                                                                                                             |        |
|------------|---------------------------------------------------------------------------------------------------------------------------------------------|--------|
| 0          | Q3QL41_9GAMM (Q3QL41) Phosphoesterase, PA-phosphatase related precursor, partial (13%) [TC587259]                                           | 15,870 |
| Gna12      | Rattus norvegicus guanine nucleotide binding protein (G protein) alpha 12 (Gna12), mRNA [NM_031034]                                         | 15,865 |
| 0          | Unknown                                                                                                                                     | 15,865 |
| Btf3       | Rattus norvegicus basic transcription factor 3 (Btf3), mRNA [NM_001008309]                                                                  | 15,863 |
| 0          | Unknown                                                                                                                                     | 15,859 |
| Tp53inp1   | Rattus norvegicus tumor protein p53 inducible nuclear protein 1 (Tp53inp1), mRNA [NM_181084]                                                | 15,854 |
| Foxl2      | Uncharacterized protein [Source:UniProtKB/TrEMBL;Acc:D4A0S1] [ENSRNOT00000023091]                                                           | 15,851 |
| Sox4       | PREDICTED: Rattus norvegicus SRY (sex determining region Y)-box 4 (Sox4), mRNA [XM_344594]                                                  | 15,847 |
| Synpo2l    | Uncharacterized protein [Source:UniProtKB/TrEMBL;Acc:D3ZZ68] [ENSRNOT00000011956]                                                           | 15,846 |
| 0          | Unknown                                                                                                                                     | 15,845 |
| 0          | Glycerol kinase [Source:UniProtKB/Swiss-Prot;Acc:Q63060] [ENSRNOT00000042729]                                                               | 15,836 |
| Pomt1      | Rattus norvegicus protein-O-mannosyltransferase 1 (Pomt1), mRNA [NM_053406]                                                                 | 15,831 |
| Cdh2       | Rattus norvegicus cadherin 2 (Cdh2), mRNA [NM_031333]                                                                                       | 15,830 |
| 0          | PREDICTED: Rattus norvegicus ubiquitination factor E4B (Ube4b), mRNA [XM_233679]                                                            | 15,828 |
| 0          | Rattus norvegicus similar to gtf2ird2 (LOC360795), mRNA [XM_341065]                                                                         | 15,825 |
| Fbxo17     | Rattus norvegicus F-box protein 17 (Fbxo17), mRNA [NM_001013064]                                                                            | 15,825 |
| RGD1565923 | PREDICTED: Rattus norvegicus similar to hypothetical protein FLJ20972 (RGD1565923), mRNA [XM_575900]                                        | 15,825 |
| Sephs1     | Rattus norvegicus selenophosphate synthetase 1 (Sephs1), mRNA [NM_001104630]                                                                | 15,824 |
| S100a11    | Rattus norvegicus S100 calcium binding protein A11 (calizzarin) (S100a11), mRNA [NM_001004095]                                              | 15,823 |
| Olr1335    | Rattus norvegicus olfactory receptor 1335 (Olr1335), mRNA [NM_001000479]                                                                    | 15,820 |
| 0          | Unknown                                                                                                                                     | 15,817 |
| RGD1306526 | Rattus norvegicus hypothetical LOC310764 (RGD1306526), mRNA [NM_001107713]                                                                  | 15,817 |
| Galnt1     | Rattus norvegicus UDP-N-acetyl-alpha-D-galactosamine:polypeptide N-acetylgalactosaminyltransferase 1 (GalNAc-T1) (Galnt1), mRNA [NM_024373] | 15,815 |
| Prpf18     | Rattus norvegicus PRP18 pre-mRNA processing factor 18 homolog (S. cerevisiae) (Prpf18), mRNA [NM_138523]                                    | 15,812 |
| 0          | Unknown                                                                                                                                     | 15,812 |
| Pxk        | Rattus norvegicus PX domain containing serine/threonine kinase (Pxk), mRNA [NM_182821]                                                      | 15,807 |
| Zdhhc2     | Rattus norvegicus zinc finger, DHHC-type containing 2 (Zdhhc2), mRNA [NM_145096]                                                            | 15,803 |
| Prickle2   | Rattus norvegicus prickle homolog 2 (Drosophila) (Prickle2), mRNA [NM_001107876]                                                            | 15,801 |
| Trank1     | Rattus norvegicus tetratricopeptide repeat and ankyrin repeat containing 1 (Trank1), mRNA [NM_001191799]                                    | 15,798 |
| Ank1       | Rattus norvegicus ankyrin 1, erythrocytic (Ank1), mRNA [NM_001107322]                                                                       | 15,795 |
| Tlx3       | PREDICTED: Rattus norvegicus T-cell leukemia, homeobox 3 (Tlx3), mRNA [XM_001064411]                                                        | 15,793 |
| Slc20a2    | Rattus norvegicus solute carrier family 20 (phosphate transporter), member 2 (Slc20a2), mRNA [NM_017223]                                    | 15,793 |
| Srfbp1     | Rattus norvegicus serum response factor binding protein 1 (Srfbp1), mRNA [NM_001005536]                                                     | 15,792 |



|            |                                                                                                                                        |        |
|------------|----------------------------------------------------------------------------------------------------------------------------------------|--------|
| Cabp4      | Rattus norvegicus calcium binding protein 4 (Cabp4), mRNA [NM_001108926]                                                               | 15,791 |
| Dnal1      | Rattus norvegicus dynein, axonemal, light chain 1 (Dnal1), mRNA [NM_001109477]                                                         | 15,791 |
| Olr1513    | Rattus norvegicus olfactory receptor 1513 (Olr1513), mRNA [NM_001000035]                                                               | 15,790 |
| Serinc5    | Rattus norvegicus serine incorporator 5 (Serinc5), mRNA [NM_133395]                                                                    | 15,784 |
| Pcdh19     | Rattus norvegicus protocadherin 19 (Pcdh19), mRNA [NM_001169129]                                                                       | 15,782 |
| Pitrm1     | Rattus norvegicus pitrilysin metallopeptidase 1 (Pitrm1), nuclear gene encoding mitochondrial protein, mRNA [NM_001107363]             | 15,777 |
| Mrps18a    | Rattus norvegicus mitochondrial ribosomal protein S18A (Mrps18a), nuclear gene encoding mitochondrial protein, mRNA [NM_198756]        | 15,777 |
| 0          | PREDICTED: Rattus norvegicus similar to zinc finger protein 617 (LOC684006), mRNA [XM_001068456]                                       | 15,767 |
| LOC682999  | Rattus norvegicus hypothetical protein LOC682999 (LOC682999), mRNA [NM_001127600]                                                      | 15,765 |
| Mrpl37     | Rattus norvegicus mitochondrial ribosomal protein L37 (Mrpl37), nuclear gene encoding mitochondrial protein, mRNA [NM_001004235]       | 15,762 |
| Man2b1     | Rattus norvegicus mannosidase, alpha, class 2B, member 1 (Man2b1), mRNA [NM_199404]                                                    | 15,762 |
| Optn       | Rattus norvegicus optineurin (Optn), mRNA [NM_145081]                                                                                  | 15,762 |
| Plscr3     | Rattus norvegicus phospholipid scramblase 3 (Plscr3), mRNA [NM_001012139]                                                              | 15,761 |
| Mpdu1      | Rattus norvegicus mannose-P-dolichol utilization defect 1 (Mpdu1), mRNA [NM_001107011]                                                 | 15,760 |
| 0          | Q99LS0_MOUSE (Q99LS0) Esophageal cancer related gene 4 protein, partial (13%) [TC630296]                                               | 15,754 |
| Cd22       | Rattus norvegicus CD22 molecule (Cd22), mRNA [NM_001107503]                                                                            | 15,747 |
| Txnip      | Rattus norvegicus thioredoxin interacting protein (Txnip), mRNA [NM_001008767]                                                         | 15,746 |
| Med14      | Rattus norvegicus mediator complex subunit 14 (Med14), mRNA [NM_001191727]                                                             | 15,740 |
| Sec61a2    | Rattus norvegicus Sec61 alpha 2 subunit (S. cerevisiae) (Sec61a2), mRNA [NM_001170343]                                                 | 15,735 |
| lpmk       | Rattus norvegicus inositol polyphosphate multikinase (lpmk), mRNA [NM_134417]                                                          | 15,735 |
| Zfp395     | Rattus norvegicus zinc finger protein 395 (Zfp395), mRNA [NM_001107271]                                                                | 15,734 |
| RGD1560175 | Putative uncharacterized protein RGD1560175_predictedUncharacterized protein [Source:UniProtKB/TrEMBL;Acc:D4ABR5] [ENSRNOT00000046208] | 15,733 |
| Dlx3       | Rattus norvegicus distal-less homeobox 3 (Dlx3), mRNA [NM_001105832]                                                                   | 15,729 |
| Sfrs11     | Rattus norvegicus splicing factor, arginine/serine-rich 11 (Sfrs11), mRNA [NM_001035255]                                               | 15,727 |
| Stk39      | Rattus norvegicus serine/threonine kinase 39, STE20/SPS1 homolog (yeast) (Stk39), mRNA [NM_019362]                                     | 15,725 |
| Ehd4       | Rattus norvegicus EH-domain containing 4 (Ehd4), mRNA [NM_139324]                                                                      | 15,723 |
| Slc38a1    | Rattus norvegicus solute carrier family 38, member 1 (Slc38a1), mRNA [NM_138832]                                                       | 15,722 |
| Nkx6-1     | Rattus norvegicus NK6 homeobox 1 (Nkx6-1), mRNA [NM_031737]                                                                            | 15,722 |
| RGD1564560 | Rattus norvegicus similar to RCK (RGD1564560), mRNA [NM_001109292]                                                                     | 15,721 |
| 0          | Unknown                                                                                                                                | 15,720 |
| Rock2      | Rattus norvegicus Rho-associated coiled-coil containing protein kinase 2 (Rock2), mRNA [NM_013022]                                     | 15,717 |
| LOC686809  | PREDICTED: Rattus norvegicus similar to protein 7 transactivated by hepatitis B virus X antigen (LOC686809), mRNA [XM_001075804]       | 15,715 |
| 0          | Unknown                                                                                                                                | 15,713 |

|            |                                                                                                                                       |        |
|------------|---------------------------------------------------------------------------------------------------------------------------------------|--------|
| Susd5      | Sushi domain containing 5 (Predicted)Uncharacterized protein [Source:UniProtKB/TrEMBL;Acc:D3ZSC1] [ENSRNOT00000028675]                | 15,710 |
| Tmem106b   | Rattus norvegicus transmembrane protein 106B (Tmem106b), mRNA [NM_001004267]                                                          | 15,709 |
| LOC681931  | PREDICTED: Rattus norvegicus similar to PRP19/PSO4 homolog (LOC681931), mRNA [XM_001059015]                                           | 15,708 |
| lfltd1     | Rattus norvegicus intermediate filament tail domain containing 1 (lfltd1), mRNA [NM_001191980]                                        | 15,706 |
| Arih1      | Rattus norvegicus ariadne ubiquitin-conjugating enzyme E2 binding protein homolog 1 (Drosophila) (Arih1), mRNA [NM_001013108]         | 15,704 |
| Rap2ip     | Rattus norvegicus Rap2 interacting protein (Rap2ip), mRNA [NM_198758]                                                                 | 15,703 |
| Fbxo21     | Rattus norvegicus F-box protein 21 (Fbxo21), mRNA [NM_001108338]                                                                      | 15,697 |
| Ceacam6    | Rattus norvegicus carcinoembryonic antigen-related cell adhesion molecule 6 (Ceacam6), mRNA [NM_001103358]                            | 15,696 |
| 0          | Unknown                                                                                                                               | 15,690 |
| Mx1        | Rattus norvegicus myxovirus (influenza virus) resistance 1 (Mx1), mRNA [NM_173096]                                                    | 15,690 |
| Ccnd3      | Rattus norvegicus cyclin D3 (Ccnd3), mRNA [NM_012766]                                                                                 | 15,689 |
| Zfp74      | PREDICTED: Rattus norvegicus zinc finger protein 569 (Znf569), mRNA [XM_001078778]                                                    | 15,687 |
| 0          | Unknown                                                                                                                               | 15,682 |
| Sry        | Rattus norvegicus sex determining region Y (Sry), mRNA [NM_012772]                                                                    | 15,682 |
| Ywhag      | Rattus norvegicus tyrosine 3-monooxygenase/tryptophan 5-monooxygenase activation protein, gamma polypeptide (Ywhag), mRNA [NM_019376] | 15,681 |
| Cnnm2      | Rattus norvegicus cyclin M2 (Cnnm2), mRNA [NM_001011942]                                                                              | 15,679 |
| Nfkb2      | Rattus norvegicus nuclear factor of kappa light polypeptide gene enhancer in B-cells 2, p49/p100 (Nfkb2), mRNA [NM_001008349]         | 15,679 |
| Shank2     | Rattus norvegicus SH3 and multiple ankyrin repeat domains 2 (Shank2), transcript variant 1, mRNA [NM_201350]                          | 15,679 |
| Atoh7      | Rattus norvegicus atonal homolog 7 (Drosophila) (Atoh7), mRNA [NM_001170482]                                                          | 15,677 |
| 0          | Unknown                                                                                                                               | 15,673 |
| 0          | Unknown                                                                                                                               | 15,669 |
| Tmem87b    | Rattus norvegicus transmembrane protein 87B (Tmem87b), mRNA [NM_001191854]                                                            | 15,668 |
| 0          | Rattus norvegicus similar to Nedd4 binding protein 1 (LOC365705), mRNA [XM_345172]                                                    | 15,668 |
| 0          | Unknown                                                                                                                               | 15,668 |
| 0          | Unknown                                                                                                                               | 15,668 |
| Spem1      | Rattus norvegicus spermatid maturation 1 (Spem1), mRNA [NM_001109653]                                                                 | 15,667 |
| Zbtb42     | Rattus norvegicus zinc finger and BTB domain containing 42 (Zbtb42), mRNA [NM_001126302]                                              | 15,665 |
| Spata2     | Rattus norvegicus spermatogenesis associated 2 (Spata2), mRNA [NM_053675]                                                             | 15,662 |
| RGD1563866 | PREDICTED: Rattus norvegicus RGD1563866, transcript variant 2 (RGD1563866), mRNA [XM_236231]                                          | 15,662 |
| Znf652     | Rattus norvegicus zinc finger protein 652 (Znf652), mRNA [NM_001080207]                                                               | 15,660 |
| Acot7      | Rattus norvegicus acyl-CoA thioesterase 7 (Acot7), transcript variant 1, mRNA [NM_001146061]                                          | 15,657 |
| RGD1306941 | Rattus norvegicus similar to CG31122-PA (RGD1306941), mRNA [NM_001108219]                                                             | 15,651 |
| 0          | Unknown                                                                                                                               | 15,650 |
| Slc35c2    | Rattus norvegicus solute carrier family 35, member C2 (Slc35c2), mRNA [NM_001107803]                                                  | 15,650 |

|            |                                                                                                                                                                                                |        |
|------------|------------------------------------------------------------------------------------------------------------------------------------------------------------------------------------------------|--------|
| 0          | Q3FJK6_9BURK (Q3FJK6) Biotin--acetyl-CoA-carboxylase ligase, partial (5%) [TC585832]                                                                                                           | 15,650 |
| LOC680319  | Rattus norvegicus hypothetical protein LOC680319 (LOC680319), mRNA [NM_001109401]                                                                                                              | 15,646 |
| RGD1311309 | PREDICTED: Rattus norvegicus similar to 2510002A14Rik protein, transcript variant 2 (RGD1311309), mRNA [XM_002724960]                                                                          | 15,645 |
| LOC688297  | PREDICTED: Rattus norvegicus similar to Retinal rod rhodopsin-sensitive cGMP 3,5-cyclic phosphodiesterase gamma-subunit (GMP-PDE gamma), transcript variant 1 (LOC688297), mRNA [XM_001081804] | 15,644 |
| Slc5a7     | Rattus norvegicus solute carrier family 5 (choline transporter), member 7 (Slc5a7), mRNA [NM_053521]                                                                                           | 15,643 |
| Phc2       | Rattus norvegicus polyhomeotic homolog 2 (Drosophila) (Phc2), mRNA [NM_001013169]                                                                                                              | 15,641 |
| Mvk        | Rattus norvegicus mevalonate kinase (Mvk), mRNA [NM_031063]                                                                                                                                    | 15,638 |
| Fgf5       | Rattus norvegicus fibroblast growth factor 5 (Fgf5), mRNA [NM_022211]                                                                                                                          | 15,637 |
| Dnajc30    | Rattus norvegicus DnaJ (Hsp40) homolog, subfamily C, member 30 (Dnajc30), mRNA [NM_001109024]                                                                                                  | 15,636 |
| Ercc1      | Rattus norvegicus excision repair cross-complementing rodent repair deficiency, complementation group 1 (Ercc1), mRNA [NM_001106228]                                                           | 15,635 |
| Acbd7      | Rattus norvegicus acyl-Coenzyme A binding domain containing 7 (Acbd7), mRNA [NM_001126079]                                                                                                     | 15,632 |
| Cdh11      | Rattus norvegicus cadherin 11 (Cdh11), mRNA [NM_053392]                                                                                                                                        | 15,630 |
| Cda        | Rattus norvegicus cytidine deaminase (Cda), mRNA [NM_001108688]                                                                                                                                | 15,629 |
| Gadd45b    | Rattus norvegicus growth arrest and DNA-damage-inducible, beta (Gadd45b), mRNA [NM_001008321]                                                                                                  | 15,628 |
| Iqgap1     | Rattus norvegicus IQ motif containing GTPase activating protein 1 (Iqgap1), mRNA [NM_001108489]                                                                                                | 15,623 |
| 0          | Unknown                                                                                                                                                                                        | 15,622 |
| 0          | Similar to HLA-B associated transcript-2 isoform aUncharacterized protein [Source:UniProtKB/TrEMBL;Acc:D3ZUK2] [ENSRNOT00000066368]                                                            | 15,620 |
| Cdk5r1     | Rattus norvegicus cyclin-dependent kinase 5, regulatory subunit 1 (Cdk5r1), mRNA [NM_053891]                                                                                                   | 15,618 |
| 0          | Uncharacterized protein [Source:UniProtKB/TrEMBL;Acc:D4AAV5] [ENSRNOT00000019301]                                                                                                              | 15,615 |
| Pias2      | Rattus norvegicus protein inhibitor of activated STAT, 2 (Pias2), mRNA [NM_053337]                                                                                                             | 15,614 |
| Slc1a7     | Rattus norvegicus solute carrier family 1 (glutamate transporter), member 7 (Slc1a7), mRNA [NM_001108973]                                                                                      | 15,614 |
| Cd2ap      | Rattus norvegicus CD2-associated protein (Cd2ap), mRNA [NM_181475]                                                                                                                             | 15,611 |
| Wnt4       | Rattus norvegicus wingless-type MMTV integration site family, member 4 (Wnt4), mRNA [NM_053402]                                                                                                | 15,610 |
| Armc1      | Rattus norvegicus armadillo repeat containing 1 (Armc1), mRNA [NM_001106425]                                                                                                                   | 15,608 |
| Rps6ka2    | Rattus norvegicus ribosomal protein S6 kinase polypeptide 2 (Rps6ka2), mRNA [NM_057128]                                                                                                        | 15,607 |
| 0          | Unknown                                                                                                                                                                                        | 15,604 |
| Hps5       | Rattus norvegicus Hermansky-Pudlak syndrome 5 (Hps5), mRNA [NM_001135612]                                                                                                                      | 15,601 |
| 0          | Unknown                                                                                                                                                                                        | 15,597 |
| 0          | Rattus norvegicus similar to hypothetical protein (LOC306346), mRNA [XM_224724]                                                                                                                | 15,595 |
| Krt25      | Rattus norvegicus keratin 25 (Krt25), mRNA [NM_001008822]                                                                                                                                      | 15,595 |
| 0          | Q4RDS8_TETNG (Q4RDS8) Chromosome undetermined SCAF15796, whole genome shotgun sequence. (Fragment), partial (6%) [TC625290]                                                                    | 15,595 |
| 0          | Unknown                                                                                                                                                                                        | 15,594 |
| RGD1561270 | PREDICTED: Rattus norvegicus similar to Zinc finger protein 248 (RGD1561270), mRNA [XM_001057394]                                                                                              | 15,591 |

|            |                                                                                                                                            |               |
|------------|--------------------------------------------------------------------------------------------------------------------------------------------|---------------|
| RGD1561672 | PREDICTED: Rattus norvegicus similar to novel protein (RGD1561672), mRNA [XM_001065540]                                                    | <b>15,590</b> |
| Zdhhc5     | Rattus norvegicus zinc finger, DHHC-type containing 5 (Zdhhc5), mRNA [NM_001039338]                                                        | <b>15,587</b> |
| Egr2       | Rattus norvegicus early growth response 2 (Egr2), mRNA [NM_053633]                                                                         | <b>15,586</b> |
| Fam171b    | Uncharacterized protein [Source:UniProtKB/TrEMBL;Acc:D3ZTG3] [ENSRNOT00000006504]                                                          | <b>15,584</b> |
| Khdrbs1    | Rattus norvegicus KH domain containing, RNA binding, signal transduction associated 1 (Khdrbs1), mRNA [NM_130405]                          | <b>15,577</b> |
| Sf3a2      | Rattus norvegicus splicing factor 3a, subunit 2 (Sf3a2), mRNA [NM_001011986]                                                               | <b>15,575</b> |
| Ap1s1      | Rattus norvegicus adaptor-related protein complex 1, sigma 1 subunit, mRNA (cDNA clone MGC:188494 IMAGE:5623505), complete cds. [BC168682] | <b>15,574</b> |
| RGD1562415 | Unknown                                                                                                                                    | <b>15,570</b> |
| LOC687707  | Rattus norvegicus hypothetical protein LOC687707 (LOC687707), mRNA [NM_001145538]                                                          | <b>15,569</b> |
| Rbm33      | Rattus norvegicus RNA binding motif protein 33 (Rbm33), mRNA [NM_001191859]                                                                | <b>15,566</b> |
| Acbd3      | Rattus norvegicus acyl-Coenzyme A binding domain containing 3 (Acbd3), mRNA [NM_182843]                                                    | <b>15,566</b> |
| Lancl3     | Rattus norvegicus LanC lantibiotic synthetase component C-like 3 (bacterial) (Lancl3), mRNA [NM_001191728]                                 | <b>15,557</b> |
| Dstyk      | Rattus norvegicus dual serine/threonine and tyrosine protein kinase (Dstyk), mRNA [NM_199463]                                              | <b>15,556</b> |
| Snx19      | Rattus norvegicus sorting nexin 19 (Snx19), mRNA [NM_001108131]                                                                            | <b>15,552</b> |
| Yipf5      | Rattus norvegicus Yip1 domain family, member 5 (Yipf5), mRNA [NM_001014150]                                                                | <b>15,552</b> |
| Cc2d1a     | Rattus norvegicus coiled-coil and C2 domain containing 1A (Cc2d1a), mRNA [NM_001013869]                                                    | <b>15,544</b> |
| Bcas1      | Rattus norvegicus breast carcinoma amplified sequence 1 (Bcas1), mRNA [NM_145670]                                                          | <b>15,542</b> |
| Vsx1       | Rattus norvegicus visual system homeobox 1 (Vsx1), mRNA [NM_001109546]                                                                     | <b>15,542</b> |
| Chrb2      | Rattus norvegicus cholinergic receptor, nicotinic, beta 2 (neuronal) (Chrb2), mRNA [NM_019297]                                             | <b>15,540</b> |
| Mbd2       | Rattus norvegicus methyl-CpG binding domain protein 2 (Mbd2), mRNA [NM_001115025]                                                          | <b>15,539</b> |
| Rgl3       | Rattus norvegicus ral guanine nucleotide dissociation stimulator-like 3 (Rgl3), mRNA [NM_001106805]                                        | <b>15,538</b> |
| Arl4c      | PREDICTED: Rattus norvegicus ADP-ribosylation factor-like 4C (Arl4c), miscRNA [XR_085918]                                                  | <b>15,538</b> |
| 0          | Unknown                                                                                                                                    | <b>15,536</b> |
| RGD1565096 | Rattus norvegicus similar to TSG118.1 (RGD1565096), mRNA [NM_001134611]                                                                    | <b>15,534</b> |
| Plxnb2     | Rattus norvegicus plexin B2 (Plxnb2), mRNA [NM_001108106]                                                                                  | <b>15,531</b> |
| RGD1306148 | PREDICTED: Rattus norvegicus similar to KIAA0368 (RGD1306148), miscRNA [XR_085838]                                                         | <b>15,531</b> |
| Cdca7l     | Rattus norvegicus cell division cycle associated 7 like (Cdca7l), mRNA [NM_001034953]                                                      | <b>15,529</b> |
| Pias4      | Rattus norvegicus protein inhibitor of activated STAT, 4 (Pias4), mRNA [NM_001100757]                                                      | <b>15,528</b> |
| 0          | Unknown                                                                                                                                    | <b>15,527</b> |
| Clec11a    | Rattus norvegicus C-type lectin domain family 11, member a (Clec11a), mRNA [NM_001012459]                                                  | <b>15,526</b> |
| Narg2      | Rattus norvegicus NMDA receptor regulated 2 (Narg2), mRNA [NM_001191108]                                                                   | <b>15,524</b> |
| RGD1310358 | Rattus norvegicus similar to NNX3 (RGD1310358), mRNA [NM_001107507]                                                                        | <b>15,520</b> |
| Isoc1      | Rattus norvegicus isochorismatase domain containing 1 (Isoc1), mRNA [NM_001014242]                                                         | <b>15,519</b> |

|              |                                                                                                               |        |
|--------------|---------------------------------------------------------------------------------------------------------------|--------|
| Pax2         | Rattus norvegicus paired box 2 (Pax2), mRNA [NM_001106361]                                                    | 15,518 |
| Slc27a4      | Rattus norvegicus solute carrier family 27 (fatty acid transporter), member 4 (Slc27a4), mRNA [NM_001100706]  | 15,517 |
| Prss53       | Rattus norvegicus protease, serine, 53 (Prss53), mRNA [NM_001109156]                                          | 15,516 |
| LOC100361585 | Uncharacterized protein [Source:UniProtKB/TrEMBL;Acc:D3ZA11] [ENSRNOT00000022866]                             | 15,515 |
| 0            | Unknown                                                                                                       | 15,513 |
| Sncap        | Rattus norvegicus synuclein, alpha interacting protein (Sncap), mRNA [NM_001107379]                           | 15,512 |
| 0            | Unknown                                                                                                       | 15,510 |
| Arhgap8      | Rattus norvegicus Rho GTPase activating protein 8 (Arhgap8), mRNA [NM_001004242]                              | 15,506 |
| LOC361128    | Rattus norvegicus similar to TR4 orphan receptor associated protein TRA16 (LOC361128), mRNA [NM_001047104]    | 15,506 |
| Chp          | Rattus norvegicus calcium binding protein p22 (Chp), mRNA [NM_024139]                                         | 15,504 |
| 0            | Unknown                                                                                                       | 15,500 |
| LOC688511    | PREDICTED: Rattus norvegicus similar to similar to 60S ribosomal protein L12 (LOC688511), miscRNA [XR_085815] | 15,499 |
| Dclk3        | Rattus norvegicus doublecortin-like kinase 3 (Dclk3), mRNA [NM_001191800]                                     | 15,495 |
| Cish         | Rattus norvegicus cytokine inducible SH2-containing protein (Cish), mRNA [NM_031804]                          | 15,491 |
| Rap1gap      | PREDICTED: Rattus norvegicus Rap1 GTPase-activating protein (Rap1gap), mRNA [XM_001070178]                    | 15,490 |
| Klf11        | Rattus norvegicus Kruppel-like factor 11 (Klf11), mRNA [NM_001037354]                                         | 15,482 |
| Scn8a        | Rattus norvegicus sodium channel, voltage gated, type VIII, alpha subunit (Scn8a), mRNA [NM_019266]           | 15,482 |
| 0            | Unknown                                                                                                       | 15,481 |
| Troap        | RCG50654Uncharacterized protein [Source:UniProtKB/TrEMBL;Acc:D3ZLZ9] [ENSRNOT00000043479]                     | 15,480 |
| Kalrn        | Rattus norvegicus kalirin, RhoGEF kinase (Kalrn), mRNA [NM_032062]                                            | 15,480 |
| Foxo6        | Uncharacterized protein [Source:UniProtKB/TrEMBL;Acc:D3ZV21] [ENSRNOT00000050941]                             | 15,476 |
| Ncor2        | Rattus norvegicus nuclear receptor co-repressor 2 (Ncor2), mRNA [NM_001108334]                                | 15,474 |
| Ccl9         | Rattus norvegicus chemokine (C-C motif) ligand 9 (Ccl9), mRNA [NM_001012357]                                  | 15,473 |
| 0            | Unknown                                                                                                       | 15,471 |
| 0            | Unknown                                                                                                       | 15,469 |
| 0            | Unknown                                                                                                       | 15,462 |
| Camlg        | Rattus norvegicus calcium modulating ligand (Camlg), mRNA [NM_053334]                                         | 15,461 |
| Gabra3       | Rattus norvegicus gamma-aminobutyric acid (GABA) A receptor, alpha 3 (Gabra3), mRNA [NM_017069]               | 15,460 |
| 0            | Unknown                                                                                                       | 15,458 |
| Zc3h18       | Rattus norvegicus zinc finger CCCH-type containing 18 (Zc3h18), mRNA [NM_201416]                              | 15,456 |
| 0            | Unknown                                                                                                       | 15,456 |
| 0            | Unknown                                                                                                       | 15,456 |
| 0            | Unknown                                                                                                       | 15,454 |
| Dcaf10       | Rattus norvegicus DDB1 and CUL4 associated factor 10 (Dcaf10), mRNA [NM_001107935]                            | 15,450 |

|              |                                                                                                                  |        |
|--------------|------------------------------------------------------------------------------------------------------------------|--------|
| Gabbr1       | Rattus norvegicus gamma-aminobutyric acid (GABA) B receptor 1 (Gabbr1), mRNA [NM_031028]                         | 15,449 |
| Lfn3         | Rattus norvegicus leucine rich repeat and fibronectin type III domain containing 3 (Lfn3), mRNA [NM_001107502]   | 15,449 |
| LOC498972    | PREDICTED: Rattus norvegicus similar to copine II (LOC498972), mRNA [XM_002725371]                               | 15,446 |
| Tmed7        | Rattus norvegicus transmembrane emp24 protein transport domain containing 7 (Tmed7), mRNA [NM_001105758]         | 15,444 |
| 0            | Unknown                                                                                                          | 15,442 |
| Ppp1cb       | Rattus norvegicus protein phosphatase 1, catalytic subunit, beta isoform (Ppp1cb), mRNA [NM_013065]              | 15,441 |
| Spry1        | Rattus norvegicus sprouty homolog 1, antagonist of FGF signaling (Drosophila) (Spry1), mRNA [NM_001106427]       | 15,439 |
| Park2        | Rattus norvegicus Parkinson disease (autosomal recessive, juvenile) 2, parkin (Park2), mRNA [NM_020093]          | 15,439 |
| Cd3eap       | Rattus norvegicus CD3e molecule, epsilon associated protein (Cd3eap), mRNA [NM_001109416]                        | 15,437 |
| Tmem176a     | Rattus norvegicus transmembrane protein 176A (Tmem176a), mRNA [NM_001039008]                                     | 15,436 |
| Dppa3l1      | PREDICTED: Rattus norvegicus similar to developmental pluripotency-associated 3 (LOC691014), mRNA [XM_001076514] | 15,434 |
| 0            | Unknown                                                                                                          | 15,433 |
| Kbtbd5       | Rattus norvegicus kelch repeat and BTB (POZ) domain containing 5 (Kbtbd5), mRNA [NM_001108195]                   | 15,432 |
| Dscam        | Rattus norvegicus Down syndrome cell adhesion molecule (Dscam), mRNA [NM_133587]                                 | 15,431 |
| Ap3b1        | Rattus norvegicus adaptor-related protein complex 3, beta 1 subunit (Ap3b1), mRNA [NM_001107646]                 | 15,431 |
| Ttbk1        | Uncharacterized protein [Source:UniProtKB/TrEMBL;Acc:D3ZAU7] [ENSRNOT00000024824]                                | 15,430 |
| Kif23        | Rattus norvegicus kinesin family member 23 (Kif23), mRNA [NM_001108155]                                          | 15,430 |
| 0            | Unknown                                                                                                          | 15,429 |
| Ppcdc        | Rattus norvegicus phosphopantothienoylcysteine decarboxylase (Ppcdc), mRNA [NM_001108763]                        | 15,428 |
| Xpo5         | Rattus norvegicus exportin 5 (Xpo5), mRNA [NM_001108789]                                                         | 15,426 |
| 0            | Unknown                                                                                                          | 15,425 |
| RGD1311517   | Rattus norvegicus similar to RIKEN cDNA 9430015G10 (RGD1311517), mRNA [NM_001014072]                             | 15,423 |
| Ptprj        | Rattus norvegicus protein tyrosine phosphatase, receptor type, J (Ptprj), mRNA [NM_017269]                       | 15,423 |
| Mobk1a       | Rattus norvegicus MOB1, Mps One Binder kinase activator-like 1A (yeast) (Mobk1a), mRNA [NM_001108357]            | 15,422 |
| LOC688786    | Rattus norvegicus similar to CG14483-PA (LOC688786), mRNA [NM_001195245]                                         | 15,420 |
| Spats2       | Rattus norvegicus spermatogenesis associated, serine-rich 2 (Spats2), mRNA [NM_001191614]                        | 15,419 |
| 0            | Uncharacterized protein [Source:UniProtKB/TrEMBL;Acc:D3ZKM8] [ENSRNOT00000030027]                                | 15,417 |
| Rassf2       | Rattus norvegicus Ras association (RalGDS/AF-6) domain family member 2 (Rassf2), mRNA [NM_001037096]             | 15,414 |
| Agk          | Rattus norvegicus acylglycerol kinase (Agk), nuclear gene encoding mitochondrial protein, mRNA [NM_001127497]    | 15,412 |
| Tmem87a      | Uncharacterized protein [Source:UniProtKB/TrEMBL;Acc:D3ZWX1] [ENSRNOT00000011280]                                | 15,411 |
| Tex261       | Rattus norvegicus testis expressed 261 (Tex261), mRNA [NM_001017537]                                             | 15,404 |
| LOC100363994 | PREDICTED: Rattus norvegicus zinc finger protein 455-like (LOC100363994), mRNA [XM_002725924]                    | 15,403 |
| Scn4b        | Rattus norvegicus sodium channel, voltage-gated, type IV, beta (Scn4b), mRNA [NM_001008880]                      | 15,401 |
| Kcnq3        | Rattus norvegicus potassium voltage-gated channel, KQT-like subfamily, member 3 (Kcnq3), mRNA [NM_031597]        | 15,400 |

|            |                                                                                                                                                                    |        |
|------------|--------------------------------------------------------------------------------------------------------------------------------------------------------------------|--------|
| Rab3a      | Rattus norvegicus RAB3A, member RAS oncogene family (Rab3a), mRNA [NM_013018]                                                                                      | 15,399 |
| RGD1564496 | PREDICTED: Rattus norvegicus RGD1564496 (RGD1564496), mRNA [XM_001073145]                                                                                          | 15,397 |
| Gng11      | Rattus norvegicus guanine nucleotide binding protein (G protein), gamma 11 (Gng11), mRNA [NM_022396]                                                               | 15,395 |
| 0          | Q5XIM8_RAT (Q5XIM8) Lipin 1 (Predicted), partial (4%) [TC586232]                                                                                                   | 15,395 |
| Dnajc4     | Rattus norvegicus DnaJ (Hsp40) homolog, subfamily C, member 4 (Dnajc4), mRNA [NM_001013196]                                                                        | 15,394 |
| LOC679651  | Rattus norvegicus hypothetical protein LOC679651 (LOC679651), mRNA [NM_001195277]                                                                                  | 15,391 |
| 0          | Unknown                                                                                                                                                            | 15,391 |
| Adam19     | Rattus norvegicus a disintegrin and metallopeptidase domain 19 (meltrin beta) (Adam19), mRNA [NM_001160228]                                                        | 15,388 |
| Srpr       | Rattus norvegicus signal recognition particle receptor ('docking protein') (Srpr), mRNA [NM_001034150]                                                             | 15,386 |
| Mlh3       | Rattus norvegicus mutL homolog 3 (E. coli) (Mlh3), mRNA [NM_001108043]                                                                                             | 15,385 |
| Yipf3      | Rattus norvegicus Yip1 domain family, member 3 (Yipf3), mRNA [NM_001007801]                                                                                        | 15,385 |
| LOC684776  | PREDICTED: Rattus norvegicus similar to immunoglobulin superfamily, member 21 (LOC684776), mRNA [XM_001071901]                                                     | 15,380 |
| Atrnl1     | PREDICTED: Rattus norvegicus attractin like 1 (Atrnl1), mRNA [XM_217657]                                                                                           | 15,376 |
| 0          | BM387339 UI-R-CN1-cjj-c-03-0-UI.s1 UI-R-CN1 Rattus norvegicus cDNA clone UI-R-CN1-cjj-c-03-0-UI 3', mRNA sequence [BM387339]                                       | 15,376 |
| Pdzd2      | Rattus norvegicus PDZ domain containing 2 (Pdzd2), mRNA [NM_022940]                                                                                                | 15,374 |
| RGD1564463 | Uncharacterized protein [Source:UniProtKB/TrEMBL;Acc:D3ZXB2] [ENSRNOT00000004815]                                                                                  | 15,372 |
| Pcdh18     | Rattus norvegicus protocadherin 18 (Pcdh18), mRNA [NM_001100524]                                                                                                   | 15,370 |
| Tpi1       | Rattus norvegicus triosephosphate isomerase 1 (Tpi1), mRNA [NM_022922]                                                                                             | 15,364 |
| Ptgr2      | Rattus norvegicus prostaglandin reductase 2 (Ptgr2), mRNA [NM_001015009]                                                                                           | 15,357 |
| 0          | Unknown                                                                                                                                                            | 15,352 |
| 0          | Unknown                                                                                                                                                            | 15,349 |
| Sftpb      | Rattus norvegicus surfactant protein B (Sftpb), mRNA [NM_138842]                                                                                                   | 15,349 |
| Tex11      | Uncharacterized protein [Source:UniProtKB/TrEMBL;Acc:D3Z868] [ENSRNOT00000041731]                                                                                  | 15,347 |
| Prc1       | Rattus norvegicus protein regulator of cytokinesis 1 (Prc1), mRNA [NM_001107529]                                                                                   | 15,345 |
| Duxbl      | Uncharacterized protein [Source:UniProtKB/TrEMBL;Acc:D3ZTT0] [ENSRNOT00000052224]                                                                                  | 15,343 |
| Tmem132b   | Rattus norvegicus transmembrane protein 132B (Tmem132b), mRNA [NM_001134536]                                                                                       | 15,342 |
| LOC678704  | Rattus norvegicus hypothetical protein LOC678704 (LOC678704), mRNA [NM_001109369]                                                                                  | 15,340 |
| Olr3       | Rattus norvegicus olfactory receptor 3 (Olr3), mRNA [NM_001000110]                                                                                                 | 15,337 |
| Man2a1     | Rattus norvegicus mannosidase, alpha, class 2A, member 1 (Man2a1), mRNA [NM_012979]                                                                                | 15,332 |
| 0          | RCG49325, isoform CRA_bUncharacterized protein [Source:UniProtKB/TrEMBL;Acc:D3ZR95] [ENSRNOT00000025495]                                                           | 15,332 |
| SytI5      | Rattus norvegicus synaptotagmin-like 5 (SytI5), mRNA [NM_178333]                                                                                                   | 15,332 |
| 0          | Solute carrier family 39 (Zinc transporter), member 10 (Predicted), isoform CRA_aUncharacterized protein [Source:UniProtKB/TrEMBL;Acc:D4A517] [ENSRNOT00000016262] | 15,331 |
| Vapa       | Rattus norvegicus VAMP (vesicle-associated membrane protein)-associated protein A (Vapa), mRNA [NM_031631]                                                         | 15,330 |

|           |                                                                                                                                      |        |
|-----------|--------------------------------------------------------------------------------------------------------------------------------------|--------|
| Foxi3     | Rattus norvegicus forkhead box I3 (Foxi3), mRNA [NM_001109349]                                                                       | 15,329 |
| Kpna4     | Rattus norvegicus karyopherin alpha 4 (importin alpha 3) (Kpna4), mRNA [NM_001014793]                                                | 15,325 |
| Cmpk1     | Rattus norvegicus cytidine monophosphate (UMP-CMP) kinase 1 (Cmpk1), mRNA [NM_001025655]                                             | 15,320 |
| Mb        | Rattus norvegicus myoglobin (Mb), mRNA [NM_021588]                                                                                   | 15,320 |
| Naaladl1  | Rattus norvegicus N-acetylated alpha-linked acidic dipeptidase-like 1 (Naaladl1), mRNA [NM_031759]                                   | 15,315 |
| Hus1      | Rattus norvegicus HUS1 checkpoint homolog (S. pombe) (Hus1), mRNA [NM_001109092]                                                     | 15,313 |
| 0         | Unknown                                                                                                                              | 15,313 |
| Nr1h4     | Rattus norvegicus nuclear receptor subfamily 1, group H, member 4 (Nr1h4), mRNA [NM_021745]                                          | 15,312 |
| Slc28a1   | Rattus norvegicus solute carrier family 28 (sodium-coupled nucleoside transporter), member 1 (Slc28a1), mRNA [NM_053863]             | 15,310 |
| Mta1      | Rattus norvegicus metastasis associated 1 (Mta1), mRNA [NM_022588]                                                                   | 15,307 |
| Luzp1     | Rattus norvegicus leucine zipper protein 1 (Luzp1), mRNA [NM_030830]                                                                 | 15,306 |
| Tbc1d10a  | Rattus norvegicus TBC1 domain family, member 10a (Tbc1d10a), mRNA [NM_001015022]                                                     | 15,306 |
| Clcf1     | Rattus norvegicus cardiotrophin-like cytokine factor 1 (Clcf1), mRNA [NM_207615]                                                     | 15,296 |
| Ttll3     | Rattus norvegicus tubulin tyrosine ligase-like family, member 3 (Ttll3), mRNA [NM_001108640]                                         | 15,296 |
| 0         | Myeloid/lymphoid or mixed-lineage leukemia (Mapped)Uncharacterized protein [Source:UniProtKB/TrEMBL;Acc:D3ZLI0] [ENSRNOT00000020573] | 15,295 |
| Ska2      | Rattus norvegicus spindle and kinetochore associated complex subunit 2 (Ska2), mRNA [NM_001009624]                                   | 15,295 |
| Rbm16     | Rattus norvegicus RNA binding motif protein 16 (Rbm16), mRNA [NM_139094]                                                             | 15,293 |
| Dusp5     | Rattus norvegicus dual specificity phosphatase 5 (Dusp5), mRNA [NM_133578]                                                           | 15,291 |
| LOC688289 | EGF-containing fibulin-like extracellular matrix protein 2 [Source:RefSeq peptide;Acc:NP_001005907] [ENSRNOT00000027971]             | 15,280 |
| Ube2z     | Rattus norvegicus ubiquitin-conjugating enzyme E2Z (Ube2z), mRNA [NM_001037643]                                                      | 15,279 |
| Fam172a   | Rattus norvegicus family with sequence similarity 172, member A (Fam172a), mRNA [NM_001106401]                                       | 15,279 |
| Dynll1    | Rattus norvegicus dynein light chain LC8-type 1 (Dynll1), mRNA [NM_053319]                                                           | 15,279 |
| Nek6      | Rattus norvegicus NIMA (never in mitosis gene a)-related kinase 6 (Nek6), mRNA [NM_182953]                                           | 15,273 |
| Sphk2     | Rattus norvegicus sphingosine kinase 2 (Sphk2), mRNA [NM_001012066]                                                                  | 15,271 |
| Qser1     | Rattus norvegicus glutamine and serine rich 1 (Qser1), mRNA [NM_001139493]                                                           | 15,271 |
| 0         | Unknown                                                                                                                              | 15,270 |
| 0         | Unknown                                                                                                                              | 15,270 |
| Vamp8     | Rattus norvegicus vesicle-associated membrane protein 8 (Vamp8), mRNA [NM_031827]                                                    | 15,268 |
| Igsf21    | Uncharacterized protein [Source:UniProtKB/TrEMBL;Acc:D3ZH04] [ENSRNOT00000051793]                                                    | 15,265 |
| Acy3      | Rattus norvegicus aspartoacylase (aminocyclase) 3 (Acy3), mRNA [NM_001009603]                                                        | 15,264 |
| 0         | Uncharacterized protein [Source:UniProtKB/TrEMBL;Acc:D4ADU3] [ENSRNOT00000014310]                                                    | 15,263 |
| Ncam2     | Rattus norvegicus neural cell adhesion molecule 2 (Ncam2), mRNA [NM_203409]                                                          | 15,262 |
| Abca2     | Rattus norvegicus ATP-binding cassette, subfamily A (ABC1), member 2 (Abca2), mRNA [NM_024396]                                       | 15,256 |
| Cdc25b    | Rattus norvegicus cell division cycle 25 homolog B (S. pombe) (Cdc25b), mRNA [NM_133572]                                             | 15,255 |



|            |                                                                                                                                                                            |        |
|------------|----------------------------------------------------------------------------------------------------------------------------------------------------------------------------|--------|
| 0          | Unknown                                                                                                                                                                    | 15,255 |
| 0          | Unknown                                                                                                                                                                    | 15,255 |
| Gpr56      | Rattus norvegicus G protein-coupled receptor 56 (Gpr56), mRNA [NM_152242]                                                                                                  | 15,251 |
| Lin37      | Rattus norvegicus lin-37 homolog (C. elegans) (Lin37), mRNA [NM_001106245]                                                                                                 | 15,251 |
| Cep120     | Rattus norvegicus centrosomal protein 120 (Cep120), mRNA [NM_001191697]                                                                                                    | 15,250 |
| RGD1305455 | Rattus norvegicus similar to hypothetical protein FLJ10925 (RGD1305455), mRNA [NM_001024969]                                                                               | 15,250 |
| Hdlbp      | Rattus norvegicus high density lipoprotein binding protein (Hdlbp), mRNA [NM_172039]                                                                                       | 15,250 |
| 0          | Uncharacterized protein [Source:UniProtKB/TrEMBL;Acc:D3ZA84] [ENSRNOT00000031988]                                                                                          | 15,245 |
| 0          | BC062892 brother of CDO {Mus musculus} (exp=-1; wgp=0; cg=0), partial (11%) [TC613432]                                                                                     | 15,243 |
| Hs6st2     | Rattus norvegicus heparan sulfate 6-O-sulfotransferase 2 (Hs6st2), mRNA [NM_001191726]                                                                                     | 15,241 |
| Aco1       | Rattus norvegicus aconitase 1, soluble (Aco1), mRNA [NM_017321]                                                                                                            | 15,240 |
| Znf496     | PREDICTED: Rattus norvegicus zinc finger protein 496 (Znf496), mRNA [XM_220512]                                                                                            | 15,239 |
| Rab3c      | Rattus norvegicus RAB3C, member RAS oncogene family (Rab3c), mRNA [NM_133536]                                                                                              | 15,239 |
| Rit2       | Rattus norvegicus Ras-like without CAAX 2 (Rit2), mRNA [NM_001013060]                                                                                                      | 15,235 |
| Grin1a     | Rattus norvegicus glutamate receptor, ionotropic, N-methyl D-aspartate-like 1A (Grin1a), mRNA [NM_183402]                                                                  | 15,234 |
| Dfna5      | Rattus norvegicus deafness, autosomal dominant 5 (human) (Dfna5), mRNA [NM_001191749]                                                                                      | 15,234 |
| Pgap1      | Rattus norvegicus post-GPI attachment to proteins 1 (Pgap1), mRNA [NM_201990]                                                                                              | 15,231 |
| Nedd1      | Rattus norvegicus neural precursor cell expressed, developmentally down-regulated 1 (Nedd1), mRNA [NM_001106779]                                                           | 15,230 |
| 36951      | Rattus norvegicus membrane-associated ring finger (C3HC4) 1 (March1), mRNA [NM_001135838]                                                                                  | 15,229 |
| Fundc1     | Rattus norvegicus FUN14 domain containing 1 (Fundc1), mRNA [NM_001025027]                                                                                                  | 15,229 |
| Anks1a     | Rattus norvegicus ankyrin repeat and sterile alpha motif domain containing 1A (Anks1a), mRNA [NM_001107613]                                                                | 15,225 |
| Ap2m1      | Rattus norvegicus adaptor-related protein complex 2, mu 1 subunit (Ap2m1), mRNA [NM_053837]                                                                                | 15,224 |
| Lrrc28     | Rattus norvegicus leucine rich repeat containing 28 (Lrrc28), mRNA [NM_001108486]                                                                                          | 15,222 |
| 0          | Unknown                                                                                                                                                                    | 15,221 |
| LOC498972  | PREDICTED: Rattus norvegicus similar to copine II (LOC498972), partial mRNA [XM_574259]                                                                                    | 15,221 |
| Sorcs3     | Rattus norvegicus sortilin-related VPS10 domain containing receptor 3 (Sorcs3), mRNA [NM_001106367]                                                                        | 15,217 |
| 0          | Unknown                                                                                                                                                                    | 15,216 |
| 0          | Unknown                                                                                                                                                                    | 15,213 |
| Mustn1     | Rattus norvegicus musculoskeletal, embryonic nuclear protein 1 (Mustn1), mRNA [NM_181368]                                                                                  | 15,213 |
| Gtpbp1     | Rattus norvegicus GTP binding protein 1 (Gtpbp1), mRNA [NM_001199315]                                                                                                      | 15,213 |
| Dzip3      | Similar to Ubiquitin ligase protein DZIP3 (DAZ-interacting protein 3 homolog) (Predicted)Uncharacterized protein [Source:UniProtKB/TrEMBL;Acc:D3ZY61] [ENSRNOT00000002678] | 15,213 |
| Pomc       | Rattus norvegicus proopiomelanocortin (Pomc), mRNA [NM_139326]                                                                                                             | 15,213 |
| 0          | Unknown                                                                                                                                                                    | 15,212 |

|            |                                                                                                                                                          |        |
|------------|----------------------------------------------------------------------------------------------------------------------------------------------------------|--------|
| Frmd3      | Rattus norvegicus FERM domain containing 3 (Frmd3), mRNA [NM_001106662]                                                                                  | 15,210 |
| Sox2       | Rattus norvegicus SRY (sex determining region Y)-box 2 (Sox2), mRNA [NM_001109181]                                                                       | 15,209 |
| 0          | Unknown                                                                                                                                                  | 15,207 |
| Cdx1       | PREDICTED: Rattus norvegicus caudal type homeo box 1 (Cdx1), mRNA [XM_344691]                                                                            | 15,206 |
| Traf6      | Rattus norvegicus Tnf receptor-associated factor 6 (Traf6), mRNA [NM_001107754]                                                                          | 15,204 |
| Grin1a     | Rattus norvegicus glutamate receptor, ionotropic, N-methyl D-aspartate-like 1A (Grin1a), mRNA [NM_183402]                                                | 15,202 |
| Cox15      | Rattus norvegicus COX15 homolog, cytochrome c oxidase assembly protein (yeast) (Cox15), nuclear gene encoding mitochondrial protein, mRNA [NM_001033699] | 15,194 |
| Morn1      | Rattus norvegicus MORN repeat containing 1 (Morn1), mRNA [NM_001005544]                                                                                  | 15,194 |
| P2rx6      | Rattus norvegicus purinergic receptor P2X, ligand-gated ion channel, 6 (P2rx6), mRNA [NM_012721]                                                         | 15,194 |
| 0          | UI-R-Y0-acg-g-03-0-UI.s1 UI-R-Y0 Rattus norvegicus cDNA clone UI-R-Y0-acg-g-03-0-UI 3', mRNA sequence [AI716836]                                         | 15,194 |
| Rnf2       | Rattus norvegicus ring finger protein 2 (Rnf2), mRNA [NM_001025667]                                                                                      | 15,192 |
| Qk         | Rattus norvegicus quaking (Qk), mRNA [NM_001115021]                                                                                                      | 15,191 |
| Rgl1       | Rattus norvegicus ral guanine nucleotide dissociation stimulator,-like 1 (Rgl1), mRNA [NM_001105957]                                                     | 15,188 |
| 0          | Unknown                                                                                                                                                  | 15,186 |
| Dpp10      | Rattus norvegicus dipeptidylpeptidase 10 (Dpp10), mRNA [NM_001012205]                                                                                    | 15,186 |
| Cds1       | Rattus norvegicus CDP-diacylglycerol synthase 1 (Cds1), mRNA [NM_031242]                                                                                 | 15,183 |
| Agrn       | Rattus norvegicus agrin (Agrn), mRNA [NM_175754]                                                                                                         | 15,182 |
| 0          | Unknown                                                                                                                                                  | 15,182 |
| Tubg2      | Rattus norvegicus tubulin, gamma 2 (Tubg2), mRNA [NM_001191075]                                                                                          | 15,181 |
| RGD1562963 | Rattus norvegicus similar to chromosome 6 open reading frame 52 (RGD1562963), mRNA [NM_001145021]                                                        | 15,181 |
| Ankrd46    | Rattus norvegicus ankyrin repeat domain 46 (Ankrd46), mRNA [NM_001013948]                                                                                | 15,180 |
| Paqr3      | Rattus norvegicus progesterin and adipoQ receptor family member III (Paqr3), mRNA [NM_001012033]                                                         | 15,176 |
| Prkar2a    | Rattus norvegicus protein kinase, cAMP dependent regulatory, type II alpha (Prkar2a), mRNA [NM_019264]                                                   | 15,170 |
| 0          | Unknown                                                                                                                                                  | 15,167 |
| M6prbp1    | PREDICTED: Rattus norvegicus mannose-6-phosphate receptor binding protein 1 (M6prbp1), mRNA [XM_236783]                                                  | 15,167 |
| 0          | Unknown                                                                                                                                                  | 15,164 |
| Nol9       | Nol9 protein [Source:UniProtKB/TrEMBL;Acc:Q4G021] [ENSRNOT00000013535]                                                                                   | 15,164 |
| LOC680426  | PREDICTED: Rattus norvegicus similar to CG7220-PA, isoform A (LOC680426), mRNA [XM_001057119]                                                            | 15,163 |
| Adam23     | Rattus norvegicus ADAM metallopeptidase domain 23 (Adam23), mRNA [NM_001029899]                                                                          | 15,162 |
| 0          | Unknown                                                                                                                                                  | 15,161 |
| RGD1562674 | PREDICTED: Rattus norvegicus similar to kinase suppressor of ras 2 (RGD1562674), mRNA [XM_222212]                                                        | 15,161 |
| Chd4       | PREDICTED: Rattus norvegicus chromodomain helicase DNA binding protein 4 (Chd4), mRNA [XM_001063352]                                                     | 15,160 |
| Alkbh7     | Rattus norvegicus alkB, alkylation repair homolog 7 (E. coli) (Alkbh7), mRNA [NM_001109384]                                                              | 15,159 |

|            |                                                                                                                             |        |
|------------|-----------------------------------------------------------------------------------------------------------------------------|--------|
| Snd1       | Rattus norvegicus staphylococcal nuclease and tudor domain containing 1 (Snd1), mRNA [NM_022694]                            | 15,158 |
| Gpr173     | Rattus norvegicus G-protein coupled receptor 173 (Gpr173), mRNA [NM_022255]                                                 | 15,152 |
| Ppia       | Rattus norvegicus peptidylprolyl isomerase A (cyclophilin A) (Ppia), mRNA [NM_017101]                                       | 15,152 |
| Slc12a3    | Rattus norvegicus solute carrier family 12 (sodium/chloride transporters), member 3 (Slc12a3), mRNA [NM_019345]             | 15,151 |
| 0          | Unknown                                                                                                                     | 15,150 |
| Vwce       | Uncharacterized protein [Source:UniProtKB/TrEMBL;Acc:D3ZSS3] [ENSRNOT00000028268]                                           | 15,142 |
| LOC303566  | Rattus norvegicus E2F1-inducible gene (LOC303566), mRNA [NM_001017988]                                                      | 15,142 |
| Tmed2      | Rattus norvegicus transmembrane emp24 domain trafficking protein 2 (Tmed2), mRNA [NM_031722]                                | 15,141 |
| Sf3b4      | Rattus norvegicus splicing factor 3b, subunit 4 (Sf3b4), mRNA [NM_001011951]                                                | 15,140 |
| RGD1561738 | PREDICTED: Rattus norvegicus similar to interferon induced transmembrane protein 2 (1-8D) (RGD1561738), miscRNA [XR_008822] | 15,139 |
| 0          | Unknown                                                                                                                     | 15,138 |
| Dnajc8     | Rattus norvegicus DnaJ (Hsp40) homolog, subfamily C, member 8 (Dnajc8), mRNA [NM_001013168]                                 | 15,138 |
| Lef1       | Lymphoid enhancer-binding factor 1 [Source:UniProtKB/Swiss-Prot;Acc:Q9QXN1] [ENSRNOT00000013694]                            | 15,138 |
| Hs1bp3     | Uncharacterized protein [Source:UniProtKB/TrEMBL;Acc:D4A6D9] [ENSRNOT00000007991]                                           | 15,134 |
| Lrrc28     | Rattus norvegicus leucine rich repeat containing 28 (Lrrc28), mRNA [NM_001108486]                                           | 15,133 |
| Cyp2t1     | Rattus norvegicus cytochrome P450, family 2, subfamily t, polypeptide 1 (Cyp2t1), mRNA [NM_134369]                          | 15,131 |
| Hist1h4b   | Rattus norvegicus histone cluster 1, H4b (Hist1h4b), mRNA [NM_022686]                                                       | 15,130 |
| 0          | Unknown                                                                                                                     | 15,129 |
| Mkks       | Rattus norvegicus McKusick-Kaufman syndrome (Mkks), mRNA [NM_001008353]                                                     | 15,125 |
| Tcf4       | Rattus norvegicus transcription factor 4 (Tcf4), mRNA [NM_053369]                                                           | 15,122 |
| Yif1       | Rattus norvegicus Yip1 interacting factor homolog (S. cerevisiae) (Yif1), mRNA [NM_172017]                                  | 15,120 |
| Taf2       | Rattus norvegicus TAF2 RNA polymerase II, TATA box binding protein (TBP)-associated factor (Taf2), mRNA [NM_133319]         | 15,119 |
| 0          | Uncharacterized protein [Source:UniProtKB/TrEMBL;Acc:D3ZK69] [ENSRNOT00000039927]                                           | 15,119 |
| Pbld       | Rattus norvegicus phenazine biosynthesis-like protein domain containing (Pbld), mRNA [NM_138530]                            | 15,118 |
| 0          | Uncharacterized protein [Source:UniProtKB/TrEMBL;Acc:D3Z8X2] [ENSRNOT00000066542]                                           | 15,113 |
| Pecam1     | Rattus norvegicus platelet/endothelial cell adhesion molecule 1 (Pecam1), mRNA [NM_031591]                                  | 15,112 |
| Seli       | Rattus norvegicus selenoprotein I (Seli), mRNA [NM_001134754]                                                               | 15,111 |
| Ubxn2b     | Rattus norvegicus UBX domain protein 2B (Ubxn2b), mRNA [NM_001107905]                                                       | 15,108 |
| Ghrl       | Rattus norvegicus ghrelin/obestatin prepropeptide (Ghrl), mRNA [NM_021669]                                                  | 15,108 |
| Cnot6l     | Rattus norvegicus CCR4-NOT transcription complex, subunit 6-like (Cnot6l), mRNA [NM_001108355]                              | 15,102 |
| RGD1559908 | PREDICTED: Rattus norvegicus similar to hypothetical protein (RGD1559908), miscRNA [XR_086058]                              | 15,099 |
| Scpep1     | Rattus norvegicus serine carboxypeptidase 1 (Scpep1), mRNA [NM_133383]                                                      | 15,099 |
| 0          | Unknown                                                                                                                     | 15,090 |
| 0          | Unknown                                                                                                                     | 15,090 |

|           |                                                                                                                                                                                    |               |
|-----------|------------------------------------------------------------------------------------------------------------------------------------------------------------------------------------|---------------|
| Numa1     | Numa1 protein [Source:UniProtKB/TrEMBL;Acc:Q4G051] [ENSRNOT00000000474]                                                                                                            | <b>15,088</b> |
| 0         | RCG33933Uncharacterized protein [Source:UniProtKB/TrEMBL;Acc:D3ZIT0] [ENSRNOT00000013706]                                                                                          | <b>15,086</b> |
| 0         | PREDICTED: Rattus norvegicus similar to MAP/microtubule affinity-regulating kinase 4 (MAP/microtubule affinity-regulating kinase like 1) (RGD1561231), partial mRNA [XM_001081347] | <b>15,086</b> |
| Tmem18    | Rattus norvegicus transmembrane protein 18 (Tmem18), mRNA [NM_001007748]                                                                                                           | <b>15,082</b> |
| Emx1      | PREDICTED: Rattus norvegicus empty spiracles homeobox 1 (Emx1), mRNA [XM_001073769]                                                                                                | <b>15,079</b> |
| Rnf121    | ring finger protein 121 [Source:RefSeq peptide;Acc:NP_001101010] [ENSRNOT00000027321]                                                                                              | <b>15,078</b> |
| Insr      | Rattus norvegicus insulin receptor (Insr), mRNA [NM_017071]                                                                                                                        | <b>15,078</b> |
| 0         | Unknown                                                                                                                                                                            | <b>15,075</b> |
| LOC365476 | PREDICTED: Rattus norvegicus similar to chromosome 10 open reading frame 79 (LOC365476), mRNA [XM_345041]                                                                          | <b>15,072</b> |
| Cdkn1b    | Rattus norvegicus cyclin-dependent kinase inhibitor 1B (Cdkn1b), mRNA [NM_031762]                                                                                                  | <b>15,065</b> |
| 0         | Unknown                                                                                                                                                                            | <b>15,063</b> |
| 0         | Rattus norvegicus similar to 60S ribosomal protein L23a (LOC365309), mRNA [XM_344922]                                                                                              | <b>15,063</b> |
| Lrig2     | Rattus norvegicus leucine-rich repeats and immunoglobulin-like domains 2 (Lrig2), mRNA [NM_001107710]                                                                              | <b>15,055</b> |
| Gnrhr     | Rattus norvegicus gonadotropin releasing hormone receptor (Gnrhr), mRNA [NM_031038]                                                                                                | <b>15,054</b> |
| Pvalb     | Rattus norvegicus parvalbumin (Pvalb), mRNA [NM_022499]                                                                                                                            | <b>15,053</b> |
| Gucy1a3   | Guanylate cyclase soluble subunit alpha-3 [Source:UniProtKB/Swiss-Prot;Acc:P19686] [ENSRNOT00000017190]                                                                            | <b>15,053</b> |
| Syt1      | Rattus norvegicus synaptotagmin I (Syt1), mRNA [NM_001033680]                                                                                                                      | <b>15,052</b> |
| Stmn1     | Rattus norvegicus stathmin 1 (Stmn1), mRNA [NM_017166]                                                                                                                             | <b>15,051</b> |
| Agfg2     | Rattus norvegicus ArfGAP with FG repeats 2 (Agfg2), mRNA [NM_001107131]                                                                                                            | <b>15,051</b> |
| Tmod4     | Rattus norvegicus tropomodulin 4 (Tmod4), mRNA [NM_001106449]                                                                                                                      | <b>15,050</b> |
| Ttc23     | Rattus norvegicus tetratricopeptide repeat domain 23 (Ttc23), mRNA [NM_001025681]                                                                                                  | <b>15,043</b> |
| Ubp1      | Rattus norvegicus upstream binding protein 1 (LBP-1a) (Ubp1), mRNA [NM_001191819]                                                                                                  | <b>15,042</b> |
| 0         | R-spondin-2 [Source:RefSeq peptide;Acc:NP_001124047] [ENSRNOT00000007526]                                                                                                          | <b>15,042</b> |
| 0         | Unknown                                                                                                                                                                            | <b>15,037</b> |
| Mpp3      | PREDICTED: Rattus norvegicus membrane protein, palmitoylated 3 (MAGUK p55 subfamily member 3) (Mpp3), mRNA [XM_340911]                                                             | <b>15,037</b> |
| Rlbp1l2   | Rattus norvegicus retinaldehyde binding protein 1-like 2 (Rlbp1l2), mRNA [NM_001108459]                                                                                            | <b>15,034</b> |
| 0         | Unknown                                                                                                                                                                            | <b>15,034</b> |
| 0         | Unknown                                                                                                                                                                            | <b>15,033</b> |
| Mapkap1   | Rattus norvegicus mitogen-activated protein kinase associated protein 1 (Mapkap1), mRNA [NM_001011964]                                                                             | <b>15,032</b> |
| Fam194a   | Rattus norvegicus family with sequence similarity 194, member A (Fam194a), mRNA [NM_001024300]                                                                                     | <b>15,032</b> |
| Col3a1    | Rattus norvegicus collagen, type III, alpha 1 (Col3a1), mRNA [NM_032085]                                                                                                           | <b>15,029</b> |
| Tshz3     | Rattus norvegicus teashirt zinc finger homeobox 3 (Tshz3), mRNA [NM_001107506]                                                                                                     | <b>15,027</b> |
| Il1rap    | Rattus norvegicus interleukin 1 receptor accessory protein (Il1rap), transcript variant 2, mRNA [NM_001167840]                                                                     | <b>15,022</b> |

|            |                                                                                                                                             |        |
|------------|---------------------------------------------------------------------------------------------------------------------------------------------|--------|
| 0          | Ubiquitin carboxyl-terminal hydrolase [Source:UniProtKB/TrEMBL;Acc:D3ZGB0] [ENSRNOT00000003800]                                             | 15,018 |
| Fam13b1    | Rattus norvegicus family with sequence similarity 13, member B1 (Fam13b1), mRNA [NM_001106158]                                              | 15,018 |
| 0          | HECT domain containing 2 Gene [Source:MGI Symbol;Acc:MGI:2442663] [ENSRNOT00000024963]                                                      | 15,017 |
| Ttl13      | Rattus norvegicus tubulin tyrosine ligase-like family, member 13 (Ttl13), mRNA [NM_001134962]                                               | 15,006 |
| LOC688786  | Rattus norvegicus similar to CG14483-PA (LOC688786), mRNA [NM_001195245]                                                                    | 15,006 |
| 0          | Unknown                                                                                                                                     | 15,005 |
| 0          | Unknown                                                                                                                                     | 15,005 |
| 0          | Unknown                                                                                                                                     | 15,004 |
| Vom1r54    | Rattus norvegicus vomeronasal 1 receptor 54 (Vom1r54), mRNA [NM_001008963]                                                                  | 15,002 |
| Osbp17     | Rattus norvegicus oxysterol binding protein-like 7 (Osbp17), mRNA [NM_001107044]                                                            | 15,000 |
| Samd5      | Rattus norvegicus sterile alpha motif domain containing 5 (Samd5), mRNA [NM_001108901]                                                      | 14,996 |
| 0          | Unknown                                                                                                                                     | 14,993 |
| LOC679199  | PREDICTED: Rattus norvegicus similar to LanC lantibiotic synthetase component C-like 3 (LOC679199), mRNA [XM_001055199]                     | 14,991 |
| 0          | Unknown                                                                                                                                     | 14,986 |
| Glb1l      | Rattus norvegicus galactosidase, beta 1-like (Glb1l), mRNA [NM_001127529]                                                                   | 14,984 |
| nod3l      | Rattus norvegicus NOD3-like protein (nod3l), mRNA [NM_001024360]                                                                            | 14,982 |
| Znf467     | Rattus norvegicus zinc finger protein 467 (Znf467), mRNA [NM_001024327]                                                                     | 14,982 |
| Brd3       | Rattus norvegicus bromodomain containing 3 (Brd3), mRNA [NM_001108575]                                                                      | 14,976 |
| Epn2       | Rattus norvegicus epsin 2 (Epn2), transcript variant 2, mRNA [NM_001033914]                                                                 | 14,974 |
| Olr1431    | Rattus norvegicus olfactory receptor 1431 (Olr1431), mRNA [NM_001000778]                                                                    | 14,974 |
| RGD1305689 | Rattus norvegicus similar to DNA segment, Chr 14, ERATO Doi 449, expressed (RGD1305689), mRNA [NM_001008297]                                | 14,973 |
| Plxnd1     | Rattus norvegicus plexin D1 (Plxnd1), mRNA [NM_001107881]                                                                                   | 14,973 |
| 0          | Rattus norvegicus similar to 60S ribosomal protein L10 (QM protein homolog) (LOC289691), mRNA [XM_223490]                                   | 14,973 |
| 0          | Uncharacterized protein [Source:UniProtKB/TrEMBL;Acc:D3ZSU2] [ENSRNOT00000023777]                                                           | 14,971 |
| Stard13    | Rattus norvegicus StAR-related lipid transfer (START) domain containing 13 (Stard13), mRNA [NM_001109060]                                   | 14,971 |
| Zwilch     | PREDICTED: Rattus norvegicus Zwilch, kinetochore associated, homolog (Drosophila) (Zwilch), mRNA [XM_001078534]                             | 14,970 |
| Bpgm       | Rattus norvegicus 2,3-bisphosphoglycerate mutase (Bpgm), mRNA [NM_199382]                                                                   | 14,969 |
| Kdm5b      | Rattus norvegicus lysine (K)-specific demethylase 5B (Kdm5b), mRNA [NM_001107177]                                                           | 14,967 |
| 0          | Unknown                                                                                                                                     | 14,966 |
| Sparc      | Rattus norvegicus secreted protein, acidic, cysteine-rich (osteonectin) (Sparc), mRNA [NM_012656]                                           | 14,963 |
| Pcdhb10    | Rattus norvegicus protocadherin beta 10 (Pcdhb10), mRNA [NM_001114603]                                                                      | 14,963 |
| 0          | Rattus norvegicus similar to glyceraldehyde-3-phosphate dehydrogenase (phosphorylating) (EC 1.2.1.12) - mouse (LOC288024), mRNA [XM_221353] | 14,962 |
| 0          | neurobeachin Gene [Source:MGI Symbol;Acc:MGI:1347075] [ENSRNOT00000020916]                                                                  | 14,955 |

|           |                                                                                                                                                  |        |
|-----------|--------------------------------------------------------------------------------------------------------------------------------------------------|--------|
| LOC687611 | PREDICTED: Rattus norvegicus similar to transmembrane protein induced by tumor necrosis factor alpha (LOC687611), mRNA [XM_001079386]            | 14,952 |
| Crip2     | Rattus norvegicus cysteine-rich protein 2 (Crip2), mRNA [NM_022501]                                                                              | 14,949 |
| Tsc22d2   | Rattus norvegicus TSC22 domain family, member 2 (Tsc22d2), mRNA [NM_001191960]                                                                   | 14,947 |
| Acap2     | Rattus norvegicus ArfGAP with coiled-coil, ankyrin repeat and PH domains 2 (Acap2), mRNA [NM_001034006]                                          | 14,946 |
| 0         | Rattus norvegicus chromosome 8, 32 clones, strain BN/SsNHsdMCW RNOR03312986, whole genome shotgun sequence [AABR03063211]                        | 14,944 |
| Zfp148    | Rattus norvegicus zinc finger protein 148 (Zfp148), mRNA [NM_031615]                                                                             | 14,944 |
| Stard7    | Rattus norvegicus StAR-related lipid transfer (START) domain containing 7 (Stard7), mRNA [NM_001106503]                                          | 14,943 |
| LOC688778 | PREDICTED: Rattus norvegicus similar to fatty aldehyde dehydrogenase-like (LOC688778), mRNA [XM_001068253]                                       | 14,940 |
| Neu3      | Rattus norvegicus sialidase 3 (membrane sialidase) (Neu3), mRNA [NM_054010]                                                                      | 14,937 |
| 0         | Rattus norvegicus similar to RIKEN cDNA 4933431D05 (LOC287855), mRNA [XM_221162]                                                                 | 14,936 |
| Ubqln4    | Rattus norvegicus ubiquilin 4 (Ubqln4), mRNA [NM_001107688]                                                                                      | 14,932 |
| LOC686143 | PREDICTED: Rattus norvegicus similar to keratinocytes proline-rich protein, transcript variant 1 (LOC686143), mRNA [XM_001066677]                | 14,932 |
| Slc1a2    | Rattus norvegicus solute carrier family 1 (glial high affinity glutamate transporter), member 2 (Slc1a2), transcript variant 1, mRNA [NM_017215] | 14,930 |
| 0         | Unknown                                                                                                                                          | 14,928 |
| 0         | Q87X10_PSESM (Q87X10) Cobalamin synthesis protein/P47K family protein, partial (7%) [TC596564]                                                   | 14,924 |
| 0         | Unknown                                                                                                                                          | 14,924 |
| 0         | Unknown                                                                                                                                          | 14,919 |
| Garnl4    | Rattus norvegicus GTPase activating Rap/RanGAP domain-like 4 (Garnl4), mRNA [NM_001107019]                                                       | 14,916 |
| Fam63b    | PREDICTED: Rattus norvegicus family with sequence similarity 63, member B, transcript variant 1 (Fam63b), mRNA [XM_001054973]                    | 14,914 |
| Dlx4      | Rattus norvegicus distal-less homeobox 4 (Dlx4), mRNA [NM_001107040]                                                                             | 14,908 |
| Cks1b     | Rattus norvegicus CDC28 protein kinase regulatory subunit 1B (Cks1b), mRNA [NM_001135749]                                                        | 14,907 |
| Stxbp4    | Rattus norvegicus syntaxin binding protein 4 (Stxbp4), mRNA [NM_001107038]                                                                       | 14,907 |
| Ep400     | Rattus norvegicus E1A binding protein p400 (Ep400), mRNA [NM_001107149]                                                                          | 14,905 |
| Golga2    | Rattus norvegicus golgi autoantigen, golgin subfamily a, 2 (Golga2), mRNA [NM_022596]                                                            | 14,903 |
| Atf2      | Rattus norvegicus activating transcription factor 2 (Atf2), mRNA [NM_031018]                                                                     | 14,902 |
| 0         | Uncharacterized protein [Source:UniProtKB/TrEMBL;Acc:D4A1U8] [ENSRNOT00000007843]                                                                | 14,901 |
| Map6      | Rattus norvegicus microtubule-associated protein 6 (Map6), mRNA [NM_017204]                                                                      | 14,901 |
| 0         | Unknown                                                                                                                                          | 14,898 |
| Rgs4      | Rattus norvegicus regulator of G-protein signaling 4 (Rgs4), mRNA [NM_017214]                                                                    | 14,895 |
| Prlh      | Rattus norvegicus prolactin releasing hormone (Prlh), mRNA [NM_022222]                                                                           | 14,894 |
| Efna1     | Rattus norvegicus ephrin A1 (Efna1), mRNA [NM_053599]                                                                                            | 14,892 |
| Olr386    | Rattus norvegicus olfactory receptor 386 (Olr386), mRNA [NM_001000856]                                                                           | 14,890 |
| Jarid1a   | PREDICTED: Rattus norvegicus jumonji, AT rich interactive domain 1A (Rbp2 like) (Jarid1a), mRNA [XM_002729425]                                   | 14,890 |
| 0         | Unknown                                                                                                                                          | 14,888 |

|            |                                                                                                                         |        |
|------------|-------------------------------------------------------------------------------------------------------------------------|--------|
| RGD1309414 | Uncharacterized protein [Source:UniProtKB/TrEMBL;Acc:D3ZG24] [ENSRNOT00000012696]                                       | 14,886 |
| Lrrc58     | Rattus norvegicus leucine rich repeat containing 58 (Lrrc58), mRNA [NM_001195558]                                       | 14,882 |
| 0          | Unknown                                                                                                                 | 14,879 |
| Itgb8      | Rattus norvegicus integrin, beta 8 (Itgb8), mRNA [NM_001108726]                                                         | 14,877 |
| Zfp94      | Rattus norvegicus zinc finger protein 94 (Zfp94), mRNA [NM_001037212]                                                   | 14,871 |
| Gck        | Rattus norvegicus glucokinase (Gck), mRNA [NM_012565]                                                                   | 14,869 |
| Slc12a5    | Rattus norvegicus solute carrier family 12 (potassium-chloride transporter), member 5 (Slc12a5), mRNA [NM_134363]       | 14,868 |
| Upk1a      | Rattus norvegicus uroplakin 1A (Upk1a), mRNA [NM_001108911]                                                             | 14,866 |
| Tceb2      | Rattus norvegicus transcription elongation factor B (SIII), polypeptide 2 (Tceb2), mRNA [NM_031129]                     | 14,865 |
| 0          | Unknown                                                                                                                 | 14,865 |
| RGD1564379 | Rattus norvegicus RGD1564379 (RGD1564379), mRNA [NM_001126295]                                                          | 14,855 |
| Bcl7c      | Rattus norvegicus B-cell CLL/lymphoma 7C (Bcl7c), mRNA [NM_001106298]                                                   | 14,854 |
| Nkd2       | Rattus norvegicus naked cuticle homolog 2 (Drosophila) (Nkd2), mRNA [NM_001107454]                                      | 14,851 |
| 0          | Unknown                                                                                                                 | 14,850 |
| 0          | Q8R4C3_CRIGR (Q8R4C3) Csr1, partial (32%) [TC596558]                                                                    | 14,845 |
| Olr1227    | Rattus norvegicus olfactory receptor 1227 (Olr1227), mRNA [NM_001000443]                                                | 14,843 |
| Ybx1       | Rattus norvegicus Y box binding protein 1 (Ybx1), mRNA [NM_031563]                                                      | 14,840 |
| 0          | probable histone-lysine N-methyltransferase NSD2 [Source:RefSeq peptide;Acc:NP_001178481] [ENSRNOT00000050238]          | 14,838 |
| Pacsin1    | Rattus norvegicus protein kinase C and casein kinase substrate in neurons 1 (Pacsin1), mRNA [NM_017294]                 | 14,833 |
| Kif1b      | Rattus norvegicus kinesin family member 1B (Kif1b), mRNA [NM_057200]                                                    | 14,833 |
| Flywch1    | PREDICTED: Rattus norvegicus FLYWCH-type zinc finger 1 (Flywch1), mRNA [XM_001056224]                                   | 14,831 |
| Ghr        | Rattus norvegicus growth hormone receptor (Ghr), mRNA [NM_017094]                                                       | 14,826 |
| Spinlw1    | Rattus norvegicus serine peptidase inhibitor-like, with Kunitz and WAP domains 1 (eppin) (Spinlw1), mRNA [NM_001109457] | 14,826 |
| 0          | Unknown                                                                                                                 | 14,822 |
| Trappc1    | Rattus norvegicus trafficking protein particle complex 1 (Trappc1), mRNA [NM_001039378]                                 | 14,819 |
| 0          | Unknown                                                                                                                 | 14,818 |
| 0          | Unknown                                                                                                                 | 14,816 |
| Dmtf1      | Rattus norvegicus cyclin D binding myb-like transcription factor 1 (Dmtf1), mRNA [NM_053693]                            | 14,814 |
| 0          | Unknown                                                                                                                 | 14,812 |
| Cdig2      | Rattus norvegicus Cdig2 protein (Cdig2), mRNA [NM_153624]                                                               | 14,809 |
| Fat4       | Rattus norvegicus FAT tumor suppressor homolog 4 (Drosophila) (Fat4), mRNA [NM_001191705]                               | 14,809 |
| RGD1311739 | Rattus norvegicus similar to RIKEN cDNA 1700037H04 (RGD1311739), mRNA [NM_001025691]                                    | 14,804 |
| Aqp4       | Rattus norvegicus aquaporin 4 (Aqp4), transcript variant 2, mRNA [NM_001142366]                                         | 14,804 |
| Kcnc4      | Rattus norvegicus potassium voltage gated channel, Shaw-related subfamily, member 4 (Kcnc4), mRNA [NM_001122776]        | 14,803 |

|            |                                                                                                                                                   |        |
|------------|---------------------------------------------------------------------------------------------------------------------------------------------------|--------|
| Ubl5       | Rattus norvegicus ubiquitin-like 5 (Ubl5), mRNA [NM_001048243]                                                                                    | 14,799 |
| Gipc1      | Rattus norvegicus GIPC PDZ domain containing family, member 1 (Gipc1), mRNA [NM_053341]                                                           | 14,798 |
| App        | Rattus norvegicus amyloid beta (A4) precursor protein (App), mRNA [NM_019288]                                                                     | 14,797 |
| Best1      | Rattus norvegicus bestrophin 1 (Best1), mRNA [NM_001011940]                                                                                       | 14,795 |
| 0          | RCG37698, isoform CRA_aUncharacterized protein [Source:UniProtKB/TrEMBL;Acc:D4AAY1] [ENSRNOT00000037022]                                          | 14,795 |
| Csnk1g3    | Rattus norvegicus casein kinase 1, gamma 3 (Csnk1g3), mRNA [NM_022855]                                                                            | 14,793 |
| RGD1566001 | Rattus norvegicus similar to DNA segment, Chr 4, Brigham & Womens Genetics 0951 expressed (RGD1566001), mRNA [NM_001109263]                       | 14,787 |
| Grm1       | Rattus norvegicus glutamate receptor, metabotropic 1 (Grm1), transcript variant 1, mRNA [NM_017011]                                               | 14,787 |
| Xpnpep1    | Rattus norvegicus X-prolyl aminopeptidase (aminopeptidase P) 1, soluble (Xpnpep1), mRNA [NM_131913]                                               | 14,785 |
| Klhl26     | Rattus norvegicus kelch-like 26 (Drosophila) (Klhl26), mRNA [NM_001106075]                                                                        | 14,785 |
| Csnk2a1    | Rattus norvegicus casein kinase 2, alpha 1 polypeptide (Csnk2a1), mRNA [NM_053824]                                                                | 14,784 |
| LOC681380  | PREDICTED: Rattus norvegicus similar to spermatogenesis associated glutamate (E)-rich protein 4b (LOC681380), mRNA [XM_002727269]                 | 14,780 |
| LOC681647  | PREDICTED: Rattus norvegicus similar to F43G9.2 (LOC681647), mRNA [XM_001057182]                                                                  | 14,778 |
| Rtn4rl2    | Rattus norvegicus reticulon 4 receptor-like 2 (Rtn4rl2), mRNA [NM_181380]                                                                         | 14,777 |
| Bmi1       | Rattus norvegicus Bmi1 polycomb ring finger oncogene (Bmi1), mRNA [NM_001107368]                                                                  | 14,777 |
| Dusp22     | Rattus norvegicus dual specificity phosphatase 22 (Dusp22), mRNA [NM_001108412]                                                                   | 14,772 |
| Clec2l     | Rattus norvegicus C-type lectin domain family 2, member L (Clec2l), mRNA [NM_001044233]                                                           | 14,771 |
| Flrt2      | Rattus norvegicus fibronectin leucine rich transmembrane protein 2 (Flrt2), mRNA [NM_001106750]                                                   | 14,770 |
| Lrch1      | Rattus norvegicus leucine-rich repeats and calponin homology (CH) domain containing 1 (Lrch1), mRNA [NM_001134727]                                | 14,765 |
| Bbx        | Rattus norvegicus bobby sox homolog (Drosophila) (Bbx), mRNA [NM_001079938]                                                                       | 14,763 |
| Pbxip1     | Rattus norvegicus pre-B-cell leukemia homeobox interacting protein 1 (Pbxip1), mRNA [NM_001100976]                                                | 14,763 |
| Gng12      | Guanine nucleotide binding protein gamma 12 subunit [Source:UniProtKB/TrEMBL;Acc:O35359] [ENSRNOT00000007403]                                     | 14,761 |
| Entpd2     | Rattus norvegicus ectonucleoside triphosphate diphosphohydrolase 2 (Entpd2), mRNA [NM_172030]                                                     | 14,760 |
| Pcdhgb7    | Rattus norvegicus protocadherin gamma subfamily B, 7 (Pcdhgb7), mRNA [NM_001012215]                                                               | 14,757 |
| Tcea1      | Rattus norvegicus transcription elongation factor A (SII) 1 (Tcea1), mRNA [NM_001025735]                                                          | 14,756 |
| Haus1      | HAUS augmin-like complex subunit 1 [Source:UniProtKB/Swiss-Prot;Acc:Q9R0A8] [ENSRNOT00000023101]                                                  | 14,753 |
| Lix1       | Rattus norvegicus Lix1 homolog (chicken) (Lix1), mRNA [NM_001106214]                                                                              | 14,750 |
| 0          | Unknown                                                                                                                                           | 14,749 |
| Srd5a2     | Rattus norvegicus steroid-5-alpha-reductase, alpha polypeptide 2 (3-oxo-5 alpha-steroid delta 4-dehydrogenase alpha 2) (Srd5a2), mRNA [NM_022711] | 14,749 |
| Unc5a      | Rattus norvegicus unc-5 homolog A (C. elegans) (Unc5a), mRNA [NM_022206]                                                                          | 14,745 |
| Fam160b2   | Rattus norvegicus family with sequence similarity 160, member B2 (Fam160b2), mRNA [NM_001170474]                                                  | 14,744 |
| Rspo3      | Rattus norvegicus R-spondin 3 homolog (Xenopus laevis) (Rspo3), mRNA [NM_001100990]                                                               | 14,742 |
| Hps4       | Rattus norvegicus Hermansky-Pudlak syndrome 4 homolog (human) (Hps4), mRNA [NM_001107148]                                                         | 14,740 |



|              |                                                                                                                               |        |
|--------------|-------------------------------------------------------------------------------------------------------------------------------|--------|
| Gigyf1       | Rattus norvegicus GRB10 interacting GYF protein 1 (Gigyf1), mRNA [NM_001107133]                                               | 14,739 |
| 0            | Stathmin [Source:UniProtKB/TrEMBL;Acc:D3Z8V0] [ENSRNOT00000050325]                                                            | 14,737 |
| Ak3          | Rattus norvegicus adenylate kinase 3 (Ak3), nuclear gene encoding mitochondrial protein, mRNA [NM_013218]                     | 14,729 |
| Slc16a2      | Rattus norvegicus solute carrier family 16, member 2 (monocarboxylic acid transporter 8) (Slc16a2), mRNA [NM_147216]          | 14,726 |
| 0            | Unknown                                                                                                                       | 14,726 |
| LOC680160    | PREDICTED: Rattus norvegicus similar to keratin associated protein 4-7, transcript variant 2 (LOC680160), mRNA [XM_001055726] | 14,726 |
| Eno1         | Rattus norvegicus enolase 1, (alpha) (Eno1), transcript variant 2, mRNA [NM_001109908]                                        | 14,724 |
| Msl2         | PREDICTED: Rattus norvegicus male-specific lethal 2-like 1 (Drosophila) (Msl2l1), mRNA [XM_236567]                            | 14,721 |
| Mmd2         | Rattus norvegicus monocyte to macrophage differentiation-associated 2 (Mmd2), mRNA [NM_001037217]                             | 14,716 |
| Znf213       | Rattus norvegicus zinc finger protein 213 (Znf213), mRNA [NM_001105764]                                                       | 14,715 |
| Gnptab       | Uncharacterized protein [Source:UniProtKB/TrEMBL;Acc:D3ZJS1] [ENSRNOT00000006946]                                             | 14,715 |
| Bcdin3d      | Rattus norvegicus BCDIN3 domain containing (Bcdin3d), mRNA [NM_001108751]                                                     | 14,715 |
| Pggt1b       | Rattus norvegicus protein geranylgeranyltransferase type I, beta subunit (Pggt1b), mRNA [NM_031082]                           | 14,714 |
| Lrfn5        | Rattus norvegicus leucine rich repeat and fibronectin type III domain containing 5 (Lrfn5), mRNA [NM_001108024]               | 14,714 |
| Znf703       | Rattus norvegicus zinc finger protein 703 (Znf703), mRNA [NM_001109425]                                                       | 14,713 |
| Fam118a      | Rattus norvegicus family with sequence similarity 118, member A (Fam118a), mRNA [NM_001173336]                                | 14,713 |
| 0            | predicted gene 6924 Gene [Source:MGI Symbol;Acc:MGI:3647600] [ENSRNOT00000043774]                                             | 14,706 |
| Lhfpl4       | Rattus norvegicus lipoma HMGIC fusion partner-like 4 (Lhfpl4), mRNA [NM_181387]                                               | 14,706 |
| LOC100366258 | Uncharacterized protein [Source:UniProtKB/TrEMBL;Acc:D3ZL26] [ENSRNOT00000051182]                                             | 14,704 |
| Mertk        | Rattus norvegicus c-mer proto-oncogene tyrosine kinase (Mertk), mRNA [NM_022943]                                              | 14,703 |
| Ube2k        | Rattus norvegicus ubiquitin-conjugating enzyme E2K (UBC1 homolog, yeast) (Ube2k), mRNA [NM_001106006]                         | 14,703 |
| Hspa12a      | Rattus norvegicus heat shock protein 12A (Hspa12a), mRNA [NM_001107445]                                                       | 14,696 |
| RGD1304728   | Uncharacterized protein [Source:UniProtKB/TrEMBL;Acc:D3ZNS7] [ENSRNOT00000018808]                                             | 14,694 |
| Chkb         | Rattus norvegicus choline kinase beta (Chkb), mRNA [NM_017177]                                                                | 14,692 |
| Gstcd        | Rattus norvegicus glutathione S-transferase, C-terminal domain containing (Gstcd), mRNA [NM_001107725]                        | 14,691 |
| Prkd3        | Rattus norvegicus protein kinase D3 (Prkd3), mRNA [NM_001024263]                                                              | 14,689 |
| Pold4        | Rattus norvegicus polymerase (DNA-directed), delta 4 (Pold4), mRNA [NM_001013195]                                             | 14,689 |
| RGD1565785   | Rattus norvegicus similar to chromosome X open reading frame 21 (RGD1565785), mRNA [NM_001109318]                             | 14,687 |
| Tnfrsf21     | Rattus norvegicus tumor necrosis factor receptor superfamily, member 21 (Tnfrsf21), mRNA [NM_001108207]                       | 14,684 |
| Wdr5         | Rattus norvegicus WD repeat domain 5 (Wdr5), mRNA [NM_001039034]                                                              | 14,684 |
| 0            | Nuclear receptor corepressor 1 [Source:UniProtKB/Swiss-Prot;Acc:Q9WUB5] [ENSRNOT00000057679]                                  | 14,680 |
| Cd320        | Rattus norvegicus CD320 molecule (Cd320), mRNA [NM_001014201]                                                                 | 14,680 |
| Hgf          | Rattus norvegicus hepatocyte growth factor (Hgf), mRNA [NM_017017]                                                            | 14,676 |
| Hcrtr1       | Rattus norvegicus hypocretin (orexin) receptor 1 (Hcrtr1), mRNA [NM_013064]                                                   | 14,676 |

|            |                                                                                                                  |        |
|------------|------------------------------------------------------------------------------------------------------------------|--------|
| Rhoj       | Rattus norvegicus ras homolog gene family, member J (Rhoj), mRNA [NM_001008320]                                  | 14,676 |
| Dlx5       | Rattus norvegicus distal-less homeobox 5 (Dlx5), mRNA [NM_012943]                                                | 14,676 |
| 0          | Unknown                                                                                                          | 14,672 |
| Prr14      | PREDICTED: Rattus norvegicus proline rich 14 (Prr14), mRNA [XM_001080025]                                        | 14,671 |
| Unc5c      | Rattus norvegicus unc-5 homolog C (C. elegans) (Unc5c), mRNA [NM_199407]                                         | 14,657 |
| Acot2      | Rattus norvegicus acyl-CoA thioesterase 2 (Acot2), nuclear gene encoding mitochondrial protein, mRNA [NM_138907] | 14,657 |
| 0          | Unknown                                                                                                          | 14,648 |
| Fam129b    | Rattus norvegicus family with sequence similarity 129, member B (Fam129b), mRNA [NM_001109885]                   | 14,645 |
| Braf       | V-raf murine sarcoma viral oncogene B1-like protein [Source:UniProtKB/TrEMBL;Acc:Q99MC6] [ENSRNOT00000014604]    | 14,644 |
| LOC685125  | Rattus norvegicus cDNA clone IMAGE:7132976. [BC166431]                                                           | 14,644 |
| Usp24      | Putative uncharacterized protein [Source:UniProtKB/TrEMBL;Acc:Q4G007] [ENSRNOT00000029228]                       | 14,643 |
| Tex19      | Rattus norvegicus testis expressed 19 (Tex19), mRNA [NM_001109622]                                               | 14,641 |
| RGD1560784 | Uncharacterized protein [Source:UniProtKB/TrEMBL;Acc:D3ZL45] [ENSRNOT00000049864]                                | 14,637 |
| Ubap1      | Rattus norvegicus ubiquitin-associated protein 1 (Ubap1), mRNA [NM_001012190]                                    | 14,635 |
| Sumo2      | Rattus norvegicus SMT3 suppressor of mif two 3 homolog 2 (S. cerevisiae) (Sumo2), mRNA [NM_133594]               | 14,633 |
| Mtap       | Rattus norvegicus methylthioadenosine phosphorylase (Mtap), mRNA [NM_001047867]                                  | 14,631 |
| Cpeb3      | Uncharacterized protein [Source:UniProtKB/TrEMBL;Acc:D3Z9M2] [ENSRNOT00000047387]                                | 14,627 |
| Zfp174     | Uncharacterized protein [Source:UniProtKB/TrEMBL;Acc:D3ZNW1] [ENSRNOT00000010059]                                | 14,627 |
| Jagn1      | Rattus norvegicus jagunal homolog 1 (Drosophila) (Jagn1), mRNA [NM_001044272]                                    | 14,627 |
| Fbxo3      | Rattus norvegicus F-box protein 3 (Fbxo3), mRNA [NM_001109606]                                                   | 14,626 |
| 0          | Uncharacterized protein [Source:UniProtKB/TrEMBL;Acc:D3ZE14] [ENSRNOT00000027981]                                | 14,623 |
| Ccl24      | Rattus norvegicus chemokine (C-C motif) ligand 24 (Ccl24), mRNA [NM_001013045]                                   | 14,623 |
| Giyd2      | Rattus norvegicus GIY-YIG domain containing 2 (Giyd2), mRNA [NM_001009292]                                       | 14,623 |
| 0          | Unknown                                                                                                          | 14,622 |
| Ptchd1     | Rattus norvegicus patched domain containing 1 (Ptchd1), mRNA [NM_001191734]                                      | 14,621 |
| Sdr39u1    | Rattus norvegicus short chain dehydrogenase/reductase family 39U, member 1 (Sdr39u1), mRNA [NM_001108378]        | 14,617 |
| Srprb      | Rattus norvegicus signal recognition particle receptor, B subunit (Srprb), mRNA [NM_001013252]                   | 14,617 |
| 0          | Unknown                                                                                                          | 14,617 |
| Vgll3      | Uncharacterized protein [Source:UniProtKB/TrEMBL;Acc:D3ZZ09] [ENSRNOT00000042316]                                | 14,615 |
| Cish       | Rattus norvegicus cytokine inducible SH2-containing protein (Cish), mRNA [NM_031804]                             | 14,613 |
| 0          | PREDICTED: Rattus norvegicus similar to novel protein (RGD1560386), partial mRNA [XM_001069736]                  | 14,611 |
| 0          | Unknown                                                                                                          | 14,610 |
| Prepl      | Rattus norvegicus prolyl endopeptidase-like (Prepl), mRNA [NM_001010951]                                         | 14,607 |
| Zdhhc8     | Rattus norvegicus zinc finger, DHHC-type containing 8 (Zdhhc8), mRNA [NM_001039021]                              | 14,605 |

|              |                                                                                                                                                                        |        |
|--------------|------------------------------------------------------------------------------------------------------------------------------------------------------------------------|--------|
| Rogdi        | Rattus norvegicus roghi homolog (Drosophila) (Rogdi), mRNA [NM_001024864]                                                                                              | 14,604 |
| Fxyd6        | Rattus norvegicus FXYD domain-containing ion transport regulator 6 (Fxyd6), mRNA [NM_022005]                                                                           | 14,598 |
| Selm         | Rattus norvegicus selenoprotein M (Selm), mRNA [NM_001115013]                                                                                                          | 14,598 |
| Ctnna2       | Rattus norvegicus catenin (cadherin associated protein), alpha 2 (Ctnna2), mRNA [NM_001106598]                                                                         | 14,597 |
| Chek1        | Rattus norvegicus CHK1 checkpoint homolog (S. pombe) (Chek1), mRNA [NM_080400]                                                                                         | 14,596 |
| Zmat4        | Rattus norvegicus zinc finger, matrin type 4 (Zmat4), mRNA [NM_001134747]                                                                                              | 14,592 |
| Ifitm1       | Rattus norvegicus interferon induced transmembrane protein 1 (Ifitm1), mRNA [NM_001106314]                                                                             | 14,588 |
| 0            | Unknown                                                                                                                                                                | 14,587 |
| Oaf          | Rattus norvegicus OAF homolog (Drosophila) (Oaf), mRNA [NM_001014090]                                                                                                  | 14,585 |
| 0            | Unknown                                                                                                                                                                | 14,584 |
| 0            | SMR1 proteinSMR1-related undecapeptideSMR1-related hexapeptideSialorphinSubmandibular gland peptide T [Source:UniProtKB/Swiss-Prot;Acc:P13432]<br>[ENSRNOT00000002664] | 14,583 |
| Klhdc5       | Rattus norvegicus kelch domain containing 5 (Klhdc5), mRNA [NM_001109257]                                                                                              | 14,578 |
| Gal3st3      | Rattus norvegicus galactose-3-O-sulfotransferase 3 (Gal3st3), mRNA [NM_001024290]                                                                                      | 14,577 |
| 0            | Rattus norvegicus TL0AAA45YD16 mRNA sequence. [FQ213860]                                                                                                               | 14,576 |
| Narg1        | Rattus norvegicus NMDA receptor regulated 1 (Narg1), mRNA [NM_001107674]                                                                                               | 14,576 |
| Ptpn21       | Rattus norvegicus protein tyrosine phosphatase, non-receptor type 21 (Ptpn21), mRNA [NM_133545]                                                                        | 14,575 |
| Nkain3       | Rattus norvegicus Na <sup>+</sup> /K <sup>+</sup> transporting ATPase interacting 3 (Nkain3), mRNA [NM_001109540]                                                      | 14,571 |
| Lrp6         | Rattus norvegicus low density lipoprotein receptor-related protein 6 (Lrp6), mRNA [NM_001107892]                                                                       | 14,570 |
| RGD1304770   | Rattus norvegicus similar to Na <sup>+</sup> dependent glucose transporter 1 (RGD1304770), mRNA [NM_001134547]                                                         | 14,568 |
| RGD1307155   | Rattus norvegicus similar to CG18661-PA (RGD1307155), mRNA [NM_001037188]                                                                                              | 14,563 |
| Nop10        | Rattus norvegicus NOP10 ribonucleoprotein homolog (yeast) (Nop10), mRNA [NM_001126100]                                                                                 | 14,561 |
| Ralbp1       | Rattus norvegicus ralA binding protein 1 (Ralbp1), mRNA [NM_032067]                                                                                                    | 14,561 |
| Hap1         | Rattus norvegicus huntingtin-associated protein 1 (Hap1), transcript variant 1, mRNA [NM_024133]                                                                       | 14,560 |
| Pdha1        | Rattus norvegicus pyruvate dehydrogenase (lipoamide) alpha 1 (Pdha1), nuclear gene encoding mitochondrial protein, mRNA [NM_001004072]                                 | 14,560 |
| Fdft1        | Rattus norvegicus farnesyl diphosphate farnesyl transferase 1 (Fdft1), mRNA [NM_019238]                                                                                | 14,548 |
| Gabarap      | Rattus norvegicus GABA(A) receptor-associated protein (Gabarap), mRNA [NM_172036]                                                                                      | 14,547 |
| Slc6a12      | Rattus norvegicus solute carrier family 6 (neurotransmitter transporter, betaine/GABA), member 12 (Slc6a12), mRNA [NM_017335]                                          | 14,546 |
| Mdm2         | Rattus norvegicus Mdm2 p53 binding protein homolog (mouse) (Mdm2), mRNA [NM_001108099]                                                                                 | 14,545 |
| RGD1564482   | Rattus norvegicus RGD1564482 (RGD1564482), non-coding RNA [NR_036617]                                                                                                  | 14,545 |
| Mrps21       | Rattus norvegicus mitochondrial ribosomal protein S21 (Mrps21), nuclear gene encoding mitochondrial protein, mRNA [NM_001126094]                                       | 14,539 |
| Tapt1        | PREDICTED: Rattus norvegicus transmembrane anterior posterior transformation 1 (Tapt1), mRNA [XM_001059604]                                                            | 14,538 |
| Lrrc20       | Rattus norvegicus leucine rich repeat containing 20 (Lrrc20), mRNA [NM_001109171]                                                                                      | 14,536 |
| LOC100188936 | Rattus norvegicus hypothetical protein LOC100188936 (LOC100188936), mRNA [NM_001134704]                                                                                | 14,536 |

|            |                                                                                                                                                      |               |
|------------|------------------------------------------------------------------------------------------------------------------------------------------------------|---------------|
| 0          | Tmem216 protein [Source:UniProtKB/TrEMBL;Acc:B6ID01] [ENSRNOT00000065430]                                                                            | <b>14,535</b> |
| Sprr3      | Rattus norvegicus small proline-rich protein 3 (Sprr3), mRNA [NM_001107686]                                                                          | <b>14,534</b> |
| Mpped2     | Rattus norvegicus metallophosphoesterase domain containing 2 (Mpped2), mRNA [NM_198778]                                                              | <b>14,534</b> |
| Nhej1      | Rattus norvegicus nonhomologous end-joining factor 1 (Nhej1), mRNA [NM_001014217]                                                                    | <b>14,532</b> |
| Omg        | Rattus norvegicus oligodendrocyte-myelin glycoprotein (Omg), mRNA [NM_001005898]                                                                     | <b>14,530</b> |
| Mier2      | Rattus norvegicus mesoderm induction early response 1, family member 2 (Mier2), mRNA [NM_001108737]                                                  | <b>14,528</b> |
| Sypl2      | Rattus norvegicus synaptophysin-like 2 (Sypl2), mRNA [NM_001108563]                                                                                  | <b>14,528</b> |
| RGD1561843 | Uncharacterized protein [Source:UniProtKB/TrEMBL;Acc:D3ZIJ2] [ENSRNOT00000045791]                                                                    | <b>14,527</b> |
| Anxa10     | Rattus norvegicus annexin A10 (Anxa10), mRNA [NM_001109110]                                                                                          | <b>14,525</b> |
| Anxa9      | PREDICTED: Rattus norvegicus annexin A9 (Anxa9), mRNA [XM_002726022]                                                                                 | <b>14,521</b> |
| Hif3a      | Rattus norvegicus hypoxia inducible factor 3, alpha subunit (Hif3a), mRNA [NM_022528]                                                                | <b>14,521</b> |
| RGD1565059 | Rattus norvegicus similar to hypothetical protein E130311K13 (RGD1565059), mRNA [NM_001127562]                                                       | <b>14,517</b> |
| Fkrp       | Rattus norvegicus fukutin related protein (Fkrp), mRNA [NM_001025678]                                                                                | <b>14,516</b> |
| 0          | Unknown                                                                                                                                              | <b>14,515</b> |
| Ermp1      | Rattus norvegicus endoplasmic reticulum metallopeptidase 1 (Ermp1), mRNA [NM_184050]                                                                 | <b>14,515</b> |
| Snrnp70    | Rattus norvegicus small nuclear ribonucleoprotein 70 (U1) (Snrnp70), mRNA [NM_001108483]                                                             | <b>14,514</b> |
| Wdr45      | Rattus norvegicus WD repeat domain 45 (Wdr45), mRNA [NM_001013958]                                                                                   | <b>14,514</b> |
| RGD1309922 | Rattus norvegicus similar to 2610301G19Rik protein (RGD1309922), mRNA [NM_001170472]                                                                 | <b>14,513</b> |
| Necap1     | Rattus norvegicus NECAP endocytosis associated 1 (Necap1), mRNA [NM_001029919]                                                                       | <b>14,509</b> |
| Kcnmb2     | Rattus norvegicus potassium large conductance calcium-activated channel, subfamily M, beta member 2 (Kcnmb2), mRNA [NM_176861]                       | <b>14,508</b> |
| Nanos3     | Rattus norvegicus nanos homolog 3 (Drosophila) (Nanos3), mRNA [NM_001105945]                                                                         | <b>14,507</b> |
| 0          | Uncharacterized protein [Source:UniProtKB/TrEMBL;Acc:D3Z919] [ENSRNOT00000068178]                                                                    | <b>14,505</b> |
| RGD1306233 | Rattus norvegicus similar to hypothetical protein MGC29761 (RGD1306233), mRNA [NM_001106564]                                                         | <b>14,504</b> |
| Cln5       | Rattus norvegicus ceroid-lipofuscinosis, neuronal 5 (Cln5), mRNA [NM_001191689]                                                                      | <b>14,502</b> |
| Atpaf1     | Rattus norvegicus ATP synthase mitochondrial F1 complex assembly factor 1 (Atpaf1), nuclear gene encoding mitochondrial protein, mRNA [NM_001107959] | <b>14,501</b> |
| Ccrn4l     | Rattus norvegicus CCR4 carbon catabolite repression 4-like (S. cerevisiae) (Ccrn4l), mRNA [NM_138526]                                                | <b>14,499</b> |
| Lpcat4     | Rattus norvegicus lysophosphatidylcholine acyltransferase 4 (Lpcat4), mRNA [NM_001106494]                                                            | <b>14,497</b> |
| 0          | Unknown                                                                                                                                              | <b>14,488</b> |
| KIFC2      | Rattus norvegicus kinesin family member C2 (KIFC2), mRNA [NM_198752]                                                                                 | <b>14,487</b> |
| Mapk9      | Rattus norvegicus mitogen-activated protein kinase 9 (Mapk9), mRNA [NM_017322]                                                                       | <b>14,486</b> |
| 0          | Unknown                                                                                                                                              | <b>14,485</b> |
| Epdr1      | Rattus norvegicus ependymin related protein 1 (zebrafish) (Epdr1), mRNA [NM_001007625]                                                               | <b>14,484</b> |
| Kcna2      | Rattus norvegicus potassium voltage-gated channel, shaker-related subfamily, member 2 (Kcna2), mRNA [NM_012970]                                      | <b>14,477</b> |

|            |                                                                                                                                                 |        |
|------------|-------------------------------------------------------------------------------------------------------------------------------------------------|--------|
| Tmem67     | Rattus norvegicus transmembrane protein 67 (Tmem67), mRNA [NM_001107916]                                                                        | 14,477 |
| Spry2      | Rattus norvegicus sprouty homolog 2 (Drosophila) (Spry2), mRNA [NM_001012046]                                                                   | 14,475 |
| Cdh23      | Rattus norvegicus cadherin 23 (otocadherin) (Cdh23), mRNA [NM_053644]                                                                           | 14,471 |
| Tril       | Rattus norvegicus TLR4 interactor with leucine-rich repeats (Tril), mRNA [NM_001034010]                                                         | 14,464 |
| 0          | Uncharacterized protein [Source:UniProtKB/TrEMBL;Acc:D3ZSM9] [ENSRNOT00000001661]                                                               | 14,456 |
| Hoxc5      | Rattus norvegicus homeo box C5 (Hoxc5), mRNA [NM_001108116]                                                                                     | 14,454 |
| 0          | CB544318 AMGNNUC:NRDG1-00127-B11-A nrdg1 (10855) Rattus norvegicus cDNA clone nrdg1-00127-b11 5', mRNA sequence [CB544318]                      | 14,453 |
| Olr1405    | Rattus norvegicus olfactory receptor 1405 (Olr1405), mRNA [NM_001001012]                                                                        | 14,448 |
| Gapdh      | Rattus norvegicus glyceraldehyde-3-phosphate dehydrogenase (Gapdh), mRNA [NM_017008]                                                            | 14,447 |
| Zdhhc18    | Rattus norvegicus zinc finger, DHHC-type containing 18 (Zdhhc18), mRNA [NM_001039339]                                                           | 14,447 |
| Dbp        | Rattus norvegicus D site of albumin promoter (albumin D-box) binding protein (Dbp), mRNA [NM_012543]                                            | 14,443 |
| 0          | Unknown                                                                                                                                         | 14,442 |
| Zdbf2      | PREDICTED: Rattus norvegicus zinc finger, DBF-type containing 2 (Zdbf2), mRNA [XM_576579]                                                       | 14,442 |
| Zfp141     | PREDICTED: Rattus norvegicus similar to zinc finger protein 420 (LOC690343), mRNA [XM_001074160]                                                | 14,440 |
| Fstl3      | Follistatin-related protein 3 [Source:UniProtKB/Swiss-Prot;Acc:Q99PW7] [ENSRNOT00000012578]                                                     | 14,440 |
| Fam86a     | Rattus norvegicus family with sequence similarity 86, member A (Fam86a), mRNA [NM_001106975]                                                    | 14,439 |
| Ankrd13c   | Rattus norvegicus ankyrin repeat domain 13C (Ankrd13c), mRNA [NM_001191570]                                                                     | 14,436 |
| 0          | Q6IE24_RAT (Q6IE24) Ubiquitin specific protease 54, complete [TC592916]                                                                         | 14,435 |
| Ubxn8      | Rattus norvegicus UBX domain protein 8 (Ubxn8), mRNA [NM_001106086]                                                                             | 14,434 |
| 0          | Uncharacterized protein [Source:UniProtKB/TrEMBL;Acc:D3ZMD5] [ENSRNOT00000056810]                                                               | 14,429 |
| Ppp2r2c    | Rattus norvegicus protein phosphatase 2 (formerly 2A), regulatory subunit B, gamma isoform (Ppp2r2c), mRNA [NM_057116]                          | 14,426 |
| Bag2       | Rattus norvegicus Bcl2-associated athanogene 2 (Bag2), mRNA [NM_001128195]                                                                      | 14,424 |
| Scd        | Rattus norvegicus stearoyl-CoA desaturase (delta-9-desaturase) (Scd), mRNA [NM_031841]                                                          | 14,423 |
| Ears2      | Rattus norvegicus glutamyl-tRNA synthetase 2 mitochondrial (putative) (Ears2), nuclear gene encoding mitochondrial protein, mRNA [NM_001159493] | 14,423 |
| Rfx3       | Rattus norvegicus regulatory factor X, 3 (influences HLA class II expression) (Rfx3), mRNA [NM_001012172]                                       | 14,419 |
| Tubgcp3    | Rattus norvegicus tubulin, gamma complex associated protein 3 (Tubgcp3), mRNA [NM_001107323]                                                    | 14,418 |
| Cntn2      | Rattus norvegicus contactin 2 (axonal) (Cntn2), mRNA [NM_012884]                                                                                | 14,416 |
| Trim25     | Rattus norvegicus tripartite motif-containing 25 (Trim25), mRNA [NM_001009536]                                                                  | 14,410 |
| 0          | Uncharacterized protein [Source:UniProtKB/TrEMBL;Acc:D3ZAT9] [ENSRNOT00000013599]                                                               | 14,409 |
| RGD1307443 | Rattus norvegicus similar to mKIAA0319 protein (RGD1307443), mRNA [NM_001197023]                                                                | 14,409 |
| Zbtb25     | Rattus norvegicus zinc finger and BTB domain containing 25 (Zbtb25), mRNA [NM_199496]                                                           | 14,408 |
| Thrsp      | Rattus norvegicus thyroid hormone responsive (Thrsp), mRNA [NM_012703]                                                                          | 14,407 |
| Insr       | Rattus norvegicus insulin receptor (Insr), mRNA [NM_017071]                                                                                     | 14,404 |

|           |                                                                                                                      |        |
|-----------|----------------------------------------------------------------------------------------------------------------------|--------|
| 0         | PREDICTED: Rattus norvegicus similar to procollagen, type IV, alpha 6 (LOC363458), partial miscRNA [XR_086365]       | 14,404 |
| Eci3      | Rattus norvegicus enoyl-Coenzyme A delta isomerase 3 (Eci3), mRNA [NM_001009275]                                     | 14,401 |
| 0         | Unknown                                                                                                              | 14,400 |
| Wipi1     | Rattus norvegicus WD repeat domain, phosphoinositide interacting 1 (Wipi1), mRNA [NM_001127297]                      | 14,400 |
| Cacna1a   | Rattus norvegicus calcium channel, voltage-dependent, P/Q type, alpha 1A subunit (Cacna1a), mRNA [NM_012918]         | 14,399 |
| Kcnh7     | Rattus norvegicus potassium voltage-gated channel, subfamily H (eag-related), member 7 (Kcnh7), mRNA [NM_131912]     | 14,396 |
| 0         | LRRG00114LRRGT00001 [Source:UniProtKB/TrEMBL;Acc:Q6QI94] [ENSRNOT00000046112]                                        | 14,395 |
| 0         | Unknown                                                                                                              | 14,389 |
| Mmp15     | Rattus norvegicus matrix metalloproteinase 15 (Mmp15), mRNA [NM_001106168]                                           | 14,389 |
| 0         | Unknown                                                                                                              | 14,382 |
| Rasa3     | Rattus norvegicus mRNA for R-ras GTPase activating protein, partial cds. [AB028626]                                  | 14,381 |
| Atp2b1    | Rattus norvegicus ATPase, Ca <sup>++</sup> transporting, plasma membrane 1 (Atp2b1), mRNA [NM_053311]                | 14,381 |
| Snai3     | Rattus norvegicus snail homolog 3 (Drosophila) (Snai3), mRNA [NM_001107439]                                          | 14,379 |
| Prom1     | Rattus norvegicus prominin 1 (Prom1), transcript variant 1, mRNA [NM_021751]                                         | 14,379 |
| Atf4      | Rattus norvegicus activating transcription factor 4 (tax-responsive enhancer element B67) (Atf4), mRNA [NM_024403]   | 14,377 |
| Mettl7a   | Rattus norvegicus methyltransferase like 7A (Mettl7a), mRNA [NM_001037355]                                           | 14,377 |
| 0         | ATP synthase subunit a [Source:UniProtKB/Swiss-Prot;Acc:P05504] [ENSRNOT00000046108]                                 | 14,374 |
| Cpne6     | Rattus norvegicus copine VI (Cpne6), mRNA [NM_001191113]                                                             | 14,371 |
| 0         | Unknown                                                                                                              | 14,370 |
| 0         | Unknown                                                                                                              | 14,369 |
| Pcdhb4    | Rattus norvegicus protocadherin beta 4 (Pcdhb4), mRNA [NM_001114601]                                                 | 14,367 |
| Rtbdn     | Rattus norvegicus retbindin (Rtbdn), mRNA [NM_001107165]                                                             | 14,366 |
| Pfkl      | Rattus norvegicus phosphofructokinase, liver (Pfkl), mRNA [NM_013190]                                                | 14,366 |
| Itga10    | Rattus norvegicus integrin, alpha 10 (Itga10), mRNA [NM_001107699]                                                   | 14,365 |
| 0         | Unknown                                                                                                              | 14,363 |
| LOC680549 | Rattus norvegicus TL0ADA40YE19 mRNA sequence. [FQ221048]                                                             | 14,361 |
| Leng1     | Rattus norvegicus leukocyte receptor cluster (LRC) member 1 (Leng1), mRNA [NM_001106218]                             | 14,361 |
| 0         | Unknown                                                                                                              | 14,357 |
| Rag1ap1   | Rattus norvegicus recombination activating gene 1 activating protein 1 (Rag1ap1), mRNA [NM_001106445]                | 14,357 |
| 0         | AW143110 EST293406 Normalized rat brain, Bento Soares Rattus sp. cDNA clone RGIBD54 5' end, mRNA sequence [AW143110] | 14,357 |
| Rab34     | Rattus norvegicus RAB34, member RAS oncogene family (Rab34), mRNA [NM_001012140]                                     | 14,356 |
| Lyplal1   | Rattus norvegicus lysophospholipase-like 1 (Lyplal1), mRNA [NM_001105986]                                            | 14,354 |
| Gulp1     | Rattus norvegicus GULP, engulfment adaptor PTB domain containing 1 (Gulp1), mRNA [NM_001013171]                      | 14,351 |
| LOC681766 | Rattus norvegicus hypothetical protein LOC681766 (LOC681766), mRNA [NM_001163562]                                    | 14,351 |

|            |                                                                                                                               |        |
|------------|-------------------------------------------------------------------------------------------------------------------------------|--------|
| Dda1       | Rattus norvegicus DET1 and DDB1 associated 1 (Dda1), mRNA [NM_001134790]                                                      | 14,348 |
| Mef2b      | Rattus norvegicus myocyte enhancer factor 2B (Mef2b), mRNA [NM_001017507]                                                     | 14,346 |
| LOC302680  | Rattus norvegicus similar to CXORF15 (LOC302680), mRNA [NM_001037187]                                                         | 14,339 |
| Vom1r55    | Rattus norvegicus vomeronasal 1 receptor 55 (Vom1r55), mRNA [NM_001166763]                                                    | 14,338 |
| Kcnk2      | Rattus norvegicus potassium channel, subfamily K, member 2 (Kcnk2), transcript variant 1, mRNA [NM_172041]                    | 14,336 |
| 0          | Unknown                                                                                                                       | 14,335 |
| Ube2q2     | Uncharacterized protein [Source:UniProtKB/TrEMBL;Acc:D4A1G2] [ENSRNOT00000019539]                                             | 14,331 |
| 0          | inverted formin, FH2 and WH2 domain containing Gene [Source:MGI Symbol;Acc:MGI:1917685] [ENSRNOT00000031962]                  | 14,331 |
| Slc26a10   | solute carrier family 26 member 10 [Source:RefSeq peptide;Acc:NP_001128067] [ENSRNOT00000052288]                              | 14,327 |
| Prtg       | Rattus norvegicus protogenin homolog (Gallus gallus) (Prtg), mRNA [NM_001037651]                                              | 14,327 |
| Foxk1      | Rattus norvegicus forkhead box K1 (Foxk1), mRNA [NM_001037219]                                                                | 14,326 |
| Tyrobp     | Rattus norvegicus Tyro protein tyrosine kinase binding protein (Tyrobp), mRNA [NM_212525]                                     | 14,325 |
| 0          | Q53UD0_BRABE (Q53UD0) Paired box protein Pax2/5/8 (Fragment), partial (9%) [TC618096]                                         | 14,323 |
| Gpd1       | Rattus norvegicus glycerol-3-phosphate dehydrogenase 1 (soluble) (Gpd1), mRNA [NM_022215]                                     | 14,321 |
| Ugt1a9     | Rattus norvegicus UDP glucuronosyltransferase 1 family, polypeptide A9 (Ugt1a9), mRNA [NM_201425]                             | 14,321 |
| RGD1565693 | PREDICTED: Rattus norvegicus similar to GLE1-like, RNA export mediator isoform 1 (RGD1565693), mRNA [XM_001059991]            | 14,319 |
| Cnr1       | Rattus norvegicus cannabinoid receptor 1 (brain) (Cnr1), mRNA [NM_012784]                                                     | 14,319 |
| Rab7b      | Rattus norvegicus Rab7b, member RAS oncogene family (Rab7b), mRNA [NM_001109328]                                              | 14,318 |
| Cdh4       | PREDICTED: Rattus norvegicus cadherin 4 (Cdh4), mRNA [XM_001061943]                                                           | 14,314 |
| Bpil1      | Rattus norvegicus bactericidal/permeability-increasing protein-like 1 (Bpil1), mRNA [NM_001106531]                            | 14,314 |
| 0          | Unknown                                                                                                                       | 14,312 |
| Maob       | Rattus norvegicus monoamine oxidase B (Maob), nuclear gene encoding mitochondrial protein, mRNA [NM_013198]                   | 14,311 |
| RGD1311946 | Rattus norvegicus similar to RIKEN cDNA 1810055G02 (RGD1311946), mRNA [NM_001025683]                                          | 14,311 |
| Krcc1      | Rattus norvegicus lysine-rich coiled-coil 1 (Krcc1), mRNA [NM_001009413]                                                      | 14,310 |
| 0          | Unknown                                                                                                                       | 14,309 |
| 0          | Rattus norvegicus similar to Glyceraldehyde 3-phosphate dehydrogenase (GAPDH) (LOC293022), mRNA [XM_218807]                   | 14,305 |
| 0          | ADAMTS-like 5 (Predicted), isoform CRA_cUncharacterized protein [Source:UniProtKB/TrEMBL;Acc:D3ZG32] [ENSRNOT00000042159]     | 14,304 |
| 0          | Unknown                                                                                                                       | 14,300 |
| Sod2       | Rattus norvegicus superoxide dismutase 2, mitochondrial (Sod2), nuclear gene encoding mitochondrial protein, mRNA [NM_017051] | 14,299 |
| RGD1308154 | PREDICTED: Rattus norvegicus similar to CG11388-PA (RGD1308154), mRNA [XM_344027]                                             | 14,295 |
| Zmynd11    | Rattus norvegicus zinc finger, MYND domain containing 11 (Zmynd11), transcript variant 2, mRNA [NM_203367]                    | 14,294 |
| Btnl5      | Rattus norvegicus butyrophilin-like 5 (Btnl5), mRNA [NM_001166351]                                                            | 14,293 |
| Abhd3      | Rattus norvegicus abhydrolase domain containing 3 (Abhd3), mRNA [NM_001106162]                                                | 14,292 |
| Fmnl1      | Rattus norvegicus formin-like 1 (Fmnl1), mRNA [NM_001105846]                                                                  | 14,290 |

|            |                                                                                                                                          |        |
|------------|------------------------------------------------------------------------------------------------------------------------------------------|--------|
| Ednrb      | Rattus norvegicus endothelin receptor type B (Ednrb), mRNA [NM_017333]                                                                   | 14,290 |
| 0          | Q7TQF0_MOUSE (Q7TQF0) Nid2 protein, partial (17%) [TC601702]                                                                             | 14,290 |
| Rnf180     | Rattus norvegicus ring finger protein 180 (Rnf180), mRNA [NM_001134986]                                                                  | 14,284 |
| 0          | Unknown                                                                                                                                  | 14,277 |
| RGD1311703 | Rattus norvegicus similar to sid2057p (RGD1311703), mRNA [NM_001013898]                                                                  | 14,277 |
| Ripk1      | Rattus norvegicus receptor (TNFRSF)-interacting serine-threonine kinase 1 (Ripk1), mRNA [NM_001107350]                                   | 14,276 |
| Alpi       | Rattus norvegicus alkaline phosphatase, intestinal (Alpi), mRNA [NM_022665]                                                              | 14,275 |
| Gtf2e1     | Rattus norvegicus general transcription factor IIE, polypeptide 1 (alpha subunit) (Gtf2e1), mRNA [NM_001100556]                          | 14,274 |
| 0          | Unknown                                                                                                                                  | 14,269 |
| Clasp1     | PREDICTED: Rattus norvegicus cytoplasmic linker associated protein 1 (Clasp1), mRNA [XM_001053715]                                       | 14,268 |
| 0          | Unknown                                                                                                                                  | 14,266 |
| Gpr146     | Rattus norvegicus G protein-coupled receptor 146 (Gpr146), mRNA [NM_001109062]                                                           | 14,265 |
| RGD1563941 | Rattus norvegicus similar to hypothetical protein FLJ20010 (RGD1563941), mRNA [NM_001109293]                                             | 14,264 |
| Galntl6    | Rattus norvegicus UDP-N-acetyl-alpha-D-galactosamine:polypeptide N-acetylgalactosaminyltransferase-like 6 (Galntl6), mRNA [NM_001135756] | 14,263 |
| 0          | Unknown                                                                                                                                  | 14,261 |
| RGD1307222 | Uncharacterized protein [Source:UniProtKB/TrEMBL;Acc:D3ZKG9] [ENSRNOT00000003687]                                                        | 14,259 |
| C2cd2l     | Rattus norvegicus C2 calcium-dependent domain containing 2-like (C2cd2l), mRNA [NM_001011996]                                            | 14,257 |
| Dnajc15    | Rattus norvegicus DnaJ (Hsp40) homolog, subfamily C, member 15 (Dnajc15), mRNA [NM_001106050]                                            | 14,255 |
| Ppp2r4     | Rattus norvegicus protein phosphatase 2A activator, regulatory subunit 4 (Ppp2r4), mRNA [NM_001108577]                                   | 14,251 |
| 0          | Unknown                                                                                                                                  | 14,250 |
| Aldh5a1    | Succinate-semialdehyde dehydrogenase, mitochondrial [Source:UniProtKB/Swiss-Prot;Acc:P51650] [ENSRNOT000000031384]                       | 14,250 |
| 0          | Unknown                                                                                                                                  | 14,250 |
| LOC365723  | PREDICTED: Rattus norvegicus similar to zinc finger protein 458 (LOC365723), miscRNA [XR_086165]                                         | 14,250 |
| 0          | Unknown                                                                                                                                  | 14,249 |
| Zkscan2    | PREDICTED: Rattus norvegicus zinc finger with KRAB and SCAN domains 2 (Zkscan2), mRNA [XM_001079250]                                     | 14,243 |
| 0          | Unknown                                                                                                                                  | 14,241 |
| Tox2       | Rattus norvegicus TOX high mobility group box family member 2 (Tox2), mRNA [NM_199392]                                                   | 14,240 |
| Cck        | Rattus norvegicus cholecystokinin (Cck), mRNA [NM_012829]                                                                                | 14,232 |
| Plekhf2    | Rattus norvegicus pleckstrin homology domain containing, family F (with FYVE domain) member 2 (Plekhf2), mRNA [NM_001108655]             | 14,227 |
| Cbx6       | Rattus norvegicus chromobox homolog 6 (Cbx6), mRNA [NM_001012119]                                                                        | 14,222 |
| 0          | Uncharacterized protein [Source:UniProtKB/TrEMBL;Acc:D3ZP34] [ENSRNOT000000061713]                                                       | 14,222 |
| Pdgfc      | Rattus norvegicus platelet derived growth factor C (Pdgfc), mRNA [NM_031317]                                                             | 14,220 |
| Tmem185a   | Rattus norvegicus transmembrane protein 185A (Tmem185a), mRNA [NM_001135712]                                                             | 14,219 |
| Dnah17     | Uncharacterized protein [Source:UniProtKB/TrEMBL;Acc:D4A2Y8] [ENSRNOT00000004035]                                                        | 14,216 |



|            |                                                                                                                                        |        |
|------------|----------------------------------------------------------------------------------------------------------------------------------------|--------|
| Nsg2       | Rattus norvegicus neuron specific gene family member 2 (Nsg2), mRNA [NM_001034152]                                                     | 14,213 |
| Ets2       | Rattus norvegicus v-ets erythroblastosis virus E26 oncogene homolog 2 (avian) (Ets2), mRNA [NM_001107107]                              | 14,213 |
| 0          | Unknown                                                                                                                                | 14,212 |
| 0          | Unknown                                                                                                                                | 14,211 |
| Mbnl2      | Rattus norvegicus muscleblind-like 2 (Mbnl2), mRNA [NM_001111064]                                                                      | 14,211 |
| Actl7a     | Rattus norvegicus actin-like 7a (Actl7a), mRNA [NM_001011973]                                                                          | 14,209 |
| RGD1561678 | PREDICTED: Rattus norvegicus similar to Ten-m1 (RGD1561678), mRNA [XM_002730177]                                                       | 14,205 |
| Cpne3      | Rattus norvegicus copine III (Cpne3), mRNA [NM_001107917]                                                                              | 14,205 |
| Clybl      | Rattus norvegicus citrate lyase beta like (Clybl), mRNA [NM_001100685]                                                                 | 14,201 |
| Gpr158     | Rattus norvegicus G protein-coupled receptor 158 (Gpr158), mRNA [NM_001170326]                                                         | 14,197 |
| Setd5      | Rattus norvegicus SET domain containing 5 (Setd5), mRNA [NM_001106614]                                                                 | 14,196 |
| Egr4       | Rattus norvegicus early growth response 4 (Egr4), mRNA [NM_019137]                                                                     | 14,195 |
| Ppm1h      | Protein phosphatase 1H [Source:UniProtKB/Swiss-Prot;Acc:Q5M821] [ENSRNOT00000005798]                                                   | 14,194 |
| Mecr       | Rattus norvegicus mitochondrial trans-2-enoyl-CoA reductase (Mecr), nuclear gene encoding mitochondrial protein, mRNA [NM_017209]      | 14,194 |
| 0          | Rattus norvegicus TL0ADA44YP20 mRNA sequence. [FQ219888]                                                                               | 14,193 |
| 0          | Unknown                                                                                                                                | 14,187 |
| Lrrtm4     | Rattus norvegicus leucine rich repeat transmembrane neuronal 4 (Lrrtm4), mRNA [NM_001134746]                                           | 14,183 |
| Trim41     | Rattus norvegicus tripartite motif-containing 41 (Trim41), mRNA [NM_001134737]                                                         | 14,181 |
| Actr1b     | Rattus norvegicus ARP1 actin-related protein 1 homolog B (yeast) (Actr1b), mRNA [NM_001039028]                                         | 14,179 |
| Wnt5a      | Rattus norvegicus wingless-type MMTV integration site family, member 5A (Wnt5a), mRNA [NM_022631]                                      | 14,176 |
| 0          | Unknown                                                                                                                                | 14,175 |
| Slc2a12    | Rattus norvegicus solute carrier family 2 (facilitated glucose transporter), member 12 (Slc2a12), mRNA [NM_001107451]                  | 14,174 |
| Alg6       | Rattus norvegicus asparagine-linked glycosylation 6, alpha-1,3-glucosyltransferase homolog (S. cerevisiae) (Alg6), mRNA [NM_001033709] | 14,173 |
| Snx3       | Rattus norvegicus sorting nexin 3 (Snx3), mRNA [NM_001044283]                                                                          | 14,172 |
| 0          | Unknown                                                                                                                                | 14,170 |
| Chmp4b     | PREDICTED: Rattus norvegicus chromatin modifying protein 4B (Chmp4b), mRNA [XM_002726259]                                              | 14,169 |
| Rtn3       | Rattus norvegicus reticulon 3 (Rtn3), transcript variant 2, mRNA [NM_001009953]                                                        | 14,169 |
| Zfp41      | Uncharacterized protein [Source:UniProtKB/TrEMBL;Acc:D3ZZK5] [ENSRNOT00000009823]                                                      | 14,168 |
| Pex10      | Rattus norvegicus peroxisomal biogenesis factor 10 (Pex10), mRNA [NM_001109405]                                                        | 14,166 |
| Tube1      | Rattus norvegicus tubulin, epsilon 1 (Tube1), mRNA [NM_001108536]                                                                      | 14,164 |
| Irs1       | Rattus norvegicus insulin receptor substrate 1 (Irs1), mRNA [NM_012969]                                                                | 14,164 |
| Reps1      | Rattus norvegicus RALBP1 associated Eps domain containing 1 (Reps1), mRNA [NM_001106264]                                               | 14,163 |
| Angptl6    | Rattus norvegicus angiopoietin-like 6 (Angptl6), mRNA [NM_001106702]                                                                   | 14,159 |
| Ccdc86     | Rattus norvegicus coiled-coil domain containing 86 (Ccdc86), mRNA [NM_001006974]                                                       | 14,159 |

|            |                                                                                                                              |               |
|------------|------------------------------------------------------------------------------------------------------------------------------|---------------|
| Arl15      | BC026093 ADP-ribosylation factor related protein 2 {Homo sapiens} (exp=-1; wgp=0; cg=0), complete [TC622058]                 | <b>14,159</b> |
| Zbtb41     | Rattus norvegicus zinc finger and BTB domain containing 41 (Zbtb41), mRNA [NM_001191670]                                     | <b>14,157</b> |
| 0          | AMGNNUC:NRHY6-00002-H8-A W Rat hypothalamus (10470) Rattus norvegicus cDNA clone nrhy6-00002-h8 5', mRNA sequence [CB750240] | <b>14,156</b> |
| Mtcp1      | PREDICTED: Rattus norvegicus mature T-cell proliferation 1 (Mtcp1), mRNA [XM_001070795]                                      | <b>14,156</b> |
| 0          | Uncharacterized protein [Source:UniProtKB/TrEMBL;Acc:D4A3M9] [ENSRNOT00000023028]                                            | <b>14,155</b> |
| Ptprs      | Rattus norvegicus protein tyrosine phosphatase, receptor type, S (Ptprs), mRNA [NM_019140]                                   | <b>14,155</b> |
| Zfp318     | PREDICTED: Rattus norvegicus zinc finger protein 318 (Zfp318), mRNA [XM_002727181]                                           | <b>14,154</b> |
| Arhgef7    | Rattus norvegicus Rho guanine nucleotide exchange factor (GEF7) (Arhgef7), transcript variant 3, mRNA [NM_053740]            | <b>14,153</b> |
| 0          | Rattus norvegicus similar to UBE2I protein (LOC305375), mRNA [XM_223442]                                                     | <b>14,149</b> |
| Pdzd7      | Rattus norvegicus PDZ domain containing 7 (Pdzd7), mRNA [NM_001106362]                                                       | <b>14,148</b> |
| Tmub1      | Rattus norvegicus transmembrane and ubiquitin-like domain containing 1 (Tmub1), transcript variant 2, mRNA [NM_001080153]    | <b>14,141</b> |
| 0          | Neuronal acetylcholine receptor subunit alpha-7 [Source:UniProtKB/Swiss-Prot;Acc:Q05941] [ENSRNOT00000020760]                | <b>14,138</b> |
| 0          | Rattus norvegicus similar to Pyruvate kinase, M2 isozyme (LOC290412), mRNA [XM_224416]                                       | <b>14,138</b> |
| Slamf8     | Rattus norvegicus SLAM family member 8 (Slamf8), mRNA [NM_001105973]                                                         | <b>14,138</b> |
| Arhgap29   | Rattus norvegicus Rho GTPase activating protein 29 (Arhgap29), mRNA [NM_001009405]                                           | <b>14,136</b> |
| 0          | Uncharacterized protein [Source:UniProtKB/TrEMBL;Acc:D4A7E7] [ENSRNOT00000011386]                                            | <b>14,135</b> |
| Olr1343    | Rattus norvegicus olfactory receptor 1343 (Olr1343), mRNA [NM_001001088]                                                     | <b>14,135</b> |
| Prr3       | Rattus norvegicus proline rich 3 (Prr3), mRNA [NM_212544]                                                                    | <b>14,134</b> |
| LOC497899  | Rattus norvegicus similar to hypothetical protein 4930503F14 (LOC497899), mRNA [NM_001017472]                                | <b>14,131</b> |
| RGD1563996 | PREDICTED: Rattus norvegicus similar to Protein UNQ9166/PRO28631 precursor (RGD1563996), mRNA [XM_001077526]                 | <b>14,125</b> |
| 0          | Uncharacterized protein [Source:UniProtKB/TrEMBL;Acc:D4AAK9] [ENSRNOT00000038851]                                            | <b>14,124</b> |
| 0          | Unknown                                                                                                                      | <b>14,124</b> |
| Kcnq1      | Rattus norvegicus potassium voltage-gated channel, KQT-like subfamily, member 1 (Kcnq1), mRNA [NM_032073]                    | <b>14,123</b> |
| Sgpp1      | PREDICTED: Rattus norvegicus sphingosine-1-phosphate phosphatase 1 (Sgpp1), mRNA [XM_001080791]                              | <b>14,122</b> |
| Zik1       | PREDICTED: Rattus norvegicus zinc finger protein interacting with K protein 1 homolog (mouse) (Zik1), mRNA [XM_001076034]    | <b>14,121</b> |
| Selplg     | Rattus norvegicus selectin P ligand (Selplg), mRNA [NM_001013230]                                                            | <b>14,119</b> |
| 0          | Unknown                                                                                                                      | <b>14,118</b> |
| Cant1      | Rattus norvegicus calcium activated nucleotidase 1 (Cant1), mRNA [NM_144754]                                                 | <b>14,115</b> |
| Aqp2       | Rattus norvegicus aquaporin 2 (collecting duct) (Aqp2), mRNA [NM_012909]                                                     | <b>14,113</b> |
| Pde2a      | Rattus norvegicus phosphodiesterase 2A, cGMP-stimulated (Pde2a), transcript variant 2, mRNA [NM_031079]                      | <b>14,113</b> |
| Tbx2       | Rattus norvegicus T-box 2 (Tbx2), mRNA [NM_001107033]                                                                        | <b>14,112</b> |
| RGD1309710 | Rattus norvegicus similar to RIKEN cDNA 0610038D11 (RGD1309710), mRNA [NM_001106330]                                         | <b>14,109</b> |
| Grik5      | Rattus norvegicus glutamate receptor, ionotropic, kainate 5 (Grik5), mRNA [NM_031508]                                        | <b>14,108</b> |
| LOC690146  | PREDICTED: Rattus norvegicus similar to zinc finger protein 11B (LOC690146), mRNA [XM_001073454]                             | <b>14,107</b> |

|            |                                                                                                                                                                                              |               |
|------------|----------------------------------------------------------------------------------------------------------------------------------------------------------------------------------------------|---------------|
| Rbp4       | Rattus norvegicus retinol binding protein 4, plasma (Rbp4), mRNA [NM_013162]                                                                                                                 | <b>14,106</b> |
| LOC683469  | Rattus norvegicus similar to RNA polymerase II transcription factor SIII subunit A2 (Elongin A2) (EloA2) (Transcription elongation factor B polypeptide 3B) (LOC683469), mRNA [NM_001115040] | <b>14,105</b> |
| RGD1564016 | PREDICTED: Rattus norvegicus RGD1564016 (RGD1564016), mRNA [XM_579897]                                                                                                                       | <b>14,103</b> |
| Kcnk13     | Rattus norvegicus potassium channel, subfamily K, member 13 (Kcnk13), mRNA [NM_022293]                                                                                                       | <b>14,103</b> |
| Ambra1     | Rattus norvegicus autophagy/beclin 1 regulator 1 (Ambra1), mRNA [NM_001134341]                                                                                                               | <b>14,100</b> |
| 0          | Rattus norvegicus similar to 60S ribosomal protein L23a (LOC292743), mRNA [XM_218374]                                                                                                        | <b>14,095</b> |
| Myo1c      | Rattus norvegicus myosin IC (Myo1c), mRNA [NM_023092]                                                                                                                                        | <b>14,094</b> |
| 0          | Unknown                                                                                                                                                                                      | <b>14,093</b> |
| Rab15      | Rattus norvegicus RAB, member RAS oncogene family-like 5 (Rab15), mRNA [NM_001011902]                                                                                                        | <b>14,091</b> |
| Card6      | Rattus norvegicus caspase recruitment domain family, member 6 (Card6), mRNA [NM_001106413]                                                                                                   | <b>14,090</b> |
| 0          | Unknown                                                                                                                                                                                      | <b>14,089</b> |
| Rab22a     | Rattus norvegicus RAB22A, member RAS oncogene family (Rab22a), mRNA [NM_001108966]                                                                                                           | <b>14,083</b> |
| Calcoco2   | PREDICTED: Rattus norvegicus calcium binding and coiled-coil domain 2 (Calcoco2), mRNA [XM_220903]                                                                                           | <b>14,082</b> |
| Bard1      | Rattus norvegicus BRCA1 associated RING domain 1 (Bard1), mRNA [NM_022622]                                                                                                                   | <b>14,082</b> |
| Dusp9      | Rattus norvegicus dual specificity phosphatase 9 (Dusp9), mRNA [NM_001037973]                                                                                                                | <b>14,081</b> |
| Fusip1     | Rattus norvegicus FUS interacting protein (serine-arginine rich) 1 (Fusip1), mRNA [NM_001025738]                                                                                             | <b>14,081</b> |
| Rnase1     | Rattus norvegicus ribonuclease, RNase A family, 1 (pancreatic) (Rnase1), mRNA [NM_001029904]                                                                                                 | <b>14,081</b> |
| Ccdc109a   | Rattus norvegicus coiled-coil domain containing 109A (Ccdc109a), mRNA [NM_001106398]                                                                                                         | <b>14,079</b> |
| Rab30      | Rattus norvegicus RAB30, member RAS oncogene family (Rab30), mRNA [NM_001015012]                                                                                                             | <b>14,078</b> |
| 0          | Unknown                                                                                                                                                                                      | <b>14,075</b> |
| Gbbp1      | Rattus norvegicus GC-rich promoter binding protein 1 (Gbbp1), mRNA [NM_001106410]                                                                                                            | <b>14,072</b> |
| Ptov1      | Rattus norvegicus prostate tumor overexpressed 1 (Ptov1), mRNA [NM_001008304]                                                                                                                | <b>14,071</b> |
| Dd25       | Rattus norvegicus hypothetical protein Dd25 (Dd25), mRNA [NM_199403]                                                                                                                         | <b>14,070</b> |
| Klhdc10    | Rattus norvegicus kelch domain containing 10 (Klhdc10), mRNA [NM_001017456]                                                                                                                  | <b>14,067</b> |
| Gtdc1      | Rattus norvegicus glycosyltransferase-like domain containing 1 (Gtdc1), mRNA [NM_001024274]                                                                                                  | <b>14,065</b> |
| 0          | Unknown                                                                                                                                                                                      | <b>14,064</b> |
| Synj2bp    | Rattus norvegicus synaptojanin 2 binding protein (Synj2bp), mRNA [NM_022599]                                                                                                                 | <b>14,061</b> |
| 0          | Uncharacterized protein [Source:UniProtKB/TrEMBL;Acc:D4A0A1] [ENSRNOT00000016712]                                                                                                            | <b>14,060</b> |
| Lipe       | Rattus norvegicus lipase, hormone sensitive (Lipe), mRNA [NM_012859]                                                                                                                         | <b>14,059</b> |
| Apool      | Rattus norvegicus apolipoprotein O-like (Apool), mRNA [NM_001014105]                                                                                                                         | <b>14,058</b> |
| Mest       | Rattus norvegicus mesoderm specific transcript homolog (mouse) (Mest), mRNA [NM_001009617]                                                                                                   | <b>14,053</b> |
| Slc24a6    | Rattus norvegicus solute carrier family 24 (sodium/potassium/calcium exchanger), member 6 (Slc24a6), mRNA [NM_001017488]                                                                     | <b>14,053</b> |
| 0          | Unknown                                                                                                                                                                                      | <b>14,051</b> |

|           |                                                                                                                           |        |
|-----------|---------------------------------------------------------------------------------------------------------------------------|--------|
| LOC687739 | PREDICTED: Rattus norvegicus hypothetical protein LOC687739 (LOC687739), mRNA [XM_001079981]                              | 14,051 |
| 0         | Unknown                                                                                                                   | 14,051 |
| Top1      | Rattus norvegicus topoisomerase (DNA) I (Top1), mRNA [NM_022615]                                                          | 14,047 |
| Pgam1     | Rattus norvegicus phosphoglycerate mutase 1 (brain) (Pgam1), mRNA [NM_053290]                                             | 14,044 |
| 0         | Uncharacterized protein [Source:UniProtKB/TrEMBL;Acc:D3ZRA7] [ENSRNOT00000025489]                                         | 14,043 |
| Xrcc6     | Rattus norvegicus X-ray repair complementing defective repair in Chinese hamster cells 6 (Xrcc6), mRNA [NM_139080]        | 14,043 |
| Trem12    | PREDICTED: Rattus norvegicus triggering receptor expressed on myeloid cells-like 2 (Trem12), mRNA [XM_001059150]          | 14,041 |
| Agrn      | Rattus norvegicus agrin (Agrn), mRNA [NM_175754]                                                                          | 14,040 |
| 0         | Unknown                                                                                                                   | 14,039 |
| LOC682469 | PREDICTED: Rattus norvegicus similar to jumonji domain containing 1B (LOC682469), mRNA [XM_001061636]                     | 14,039 |
| Slc8a1    | Rattus norvegicus solute carrier family 8 (sodium/calcium exchanger), member 1 (Slc8a1), mRNA [NM_019268]                 | 14,039 |
| Crtc3     | PREDICTED: Rattus norvegicus CREB regulated transcription coactivator 3 (Crtc3), mRNA [XM_001066604]                      | 14,036 |
| Gpc2      | Rattus norvegicus glypican 2 (Gpc2), mRNA [NM_138511]                                                                     | 14,035 |
| 0         | Unknown                                                                                                                   | 14,033 |
| LOC302228 | PREDICTED: Rattus norvegicus similar to Spindlin-like protein 2 (SPIN-2) (LOC302228), mRNA [XM_229842]                    | 14,032 |
| Utp14a    | Rattus norvegicus UTP14, U3 small nucleolar ribonucleoprotein, homolog A (yeast) (Utp14a), mRNA [NM_001014113]            | 14,021 |
| Grip2     | Rattus norvegicus glutamate receptor interacting protein 2 (Grip2), mRNA [NM_138535]                                      | 14,019 |
| Aak1      | Rattus norvegicus AP2 associated kinase 1 (Aak1), mRNA [NM_001173450]                                                     | 14,017 |
| Cnot7     | Rattus norvegicus CCR4-NOT transcription complex, subunit 7 (Cnot7), mRNA [NM_001107313]                                  | 14,015 |
| 0         | Unknown                                                                                                                   | 14,014 |
| Klf10     | Rattus norvegicus Kruppel-like factor 10 (Klf10), mRNA [NM_031135]                                                        | 14,012 |
| Nfatc4    | Rattus norvegicus nuclear factor of activated T-cells, cytoplasmic, calcineurin-dependent 4 (Nfatc4), mRNA [NM_001107264] | 14,012 |
| Hpse      | Rattus norvegicus heparanase (Hpse), mRNA [NM_022605]                                                                     | 14,009 |
| Lmo4      | Rattus norvegicus LIM domain only 4 (Lmo4), mRNA [NM_001009708]                                                           | 14,008 |
| Ncald     | Rattus norvegicus neurocalcin delta (Ncald), mRNA [NM_001024371]                                                          | 14,007 |
| Stx16     | syntaxin-16 [Source:RefSeq peptide;Acc:NP_001102080] [ENSRNOT00000007054]                                                 | 14,007 |
| 0         | Rattus norvegicus similar to glyceraldehyde-3-phosphate dehydrogenase (LOC294447), mRNA [XM_228217]                       | 14,007 |
| Ehmt1     | Rattus norvegicus euchromatic histone-lysine N-methyltransferase 1 (Ehmt1), mRNA [NM_001108572]                           | 14,006 |
| Bhlhe23   | Rattus norvegicus basic helix-loop-helix family, member e23 (Bhlhe23), mRNA [NM_001109211]                                | 14,005 |
| 0         | Unknown                                                                                                                   | 14,005 |
| LOC690347 | PREDICTED: Rattus norvegicus hypothetical protein LOC690347 (LOC690347), mRNA [XM_001074177]                              | 14,003 |
| Eif4enif1 | Rattus norvegicus eukaryotic translation initiation factor 4E nuclear import factor 1 (Eif4enif1), mRNA [NM_001107230]    | 14,001 |
| 0         | Uncharacterized protein [Source:UniProtKB/TrEMBL;Acc:D3ZSR6] [ENSRNOT000000064626]                                        | 14,000 |
| 0         | Uncharacterized protein [Source:UniProtKB/TrEMBL;Acc:D4A5N6] [ENSRNOT000000050854]                                        | 13,999 |

|              |                                                                                                                               |               |
|--------------|-------------------------------------------------------------------------------------------------------------------------------|---------------|
| Kctd6        | Rattus norvegicus potassium channel tetramerisation domain containing 6 (Kctd6), mRNA [NM_001107253]                          | <b>13,997</b> |
| Thra         | Rattus norvegicus thyroid hormone receptor alpha (Thra), transcript variant TRalpha1, mRNA [NM_001017960]                     | <b>13,996</b> |
| LOC689919    | PREDICTED: Rattus norvegicus similar to 40S ribosomal protein S26 (LOC689919), mRNA [XM_001072530]                            | <b>13,994</b> |
| Slc30a7      | Rattus norvegicus solute carrier family 30 (zinc transporter), member 7 (Slc30a7), mRNA [NM_001191715]                        | <b>13,994</b> |
| Lipa         | Rattus norvegicus lipase A, lysosomal acid, cholesterol esterase (Lipa), mRNA [NM_012732]                                     | <b>13,992</b> |
| LOC498154    | Rattus norvegicus hypothetical protein LOC498154 (LOC498154), mRNA [NM_001025033]                                             | <b>13,991</b> |
| Slc23a2      | Rattus norvegicus solute carrier family 23 (nucleobase transporters), member 2 (Slc23a2), mRNA [NM_017316]                    | <b>13,987</b> |
| Serpine2     | Rattus norvegicus serine (or cysteine) peptidase inhibitor, clade E, member 2 (Serpine2), mRNA [NM_019197]                    | <b>13,987</b> |
| Larp5        | Rattus norvegicus La ribonucleoprotein domain family, member 5 (Larp5), mRNA [NM_001107361]                                   | <b>13,978</b> |
| Brpf3        | Rattus norvegicus bromodomain and PHD finger containing, 3 (Brpf3), mRNA [NM_001107615]                                       | <b>13,975</b> |
| Nr3c2        | Rattus norvegicus nuclear receptor subfamily 3, group C, member 2 (Nr3c2), mRNA [NM_013131]                                   | <b>13,973</b> |
| Wdr45l       | Rattus norvegicus Wdr45 like (Wdr45l), mRNA [NM_001039587]                                                                    | <b>13,972</b> |
| Hiatl1       | Rattus norvegicus hippocampus abundant transcript-like 1 (Hiatl1), mRNA [NM_001107334]                                        | <b>13,970</b> |
| LOC680874    | PREDICTED: Rattus norvegicus hypothetical protein LOC680874 (LOC680874), miscRNA [XR_005897]                                  | <b>13,969</b> |
| Nek1         | Rattus norvegicus NIMA (never in mitosis gene a)-related kinase 1 (Nek1), mRNA [NM_001106082]                                 | <b>13,966</b> |
| Fuz          | Rattus norvegicus fuzzy homolog (Drosophila) (Fuz), mRNA [NM_001037646]                                                       | <b>13,960</b> |
| MGC116197    | Rattus norvegicus similar to RIKEN cDNA 1700001E04 (MGC116197), mRNA [NM_001025755]                                           | <b>13,959</b> |
| Pla2g12a     | Rattus norvegicus phospholipase A2, group XIIA (Pla2g12a), mRNA [NM_001108565]                                                | <b>13,957</b> |
| 0            | Collagen alpha-1(XI) chain [Source:UniProtKB/Swiss-Prot;Acc:P20909] [ENSRNOT00000024138]                                      | <b>13,953</b> |
| Plekhh2      | Rattus norvegicus pleckstrin homology domain containing, family H (with MyTH4 domain) member 2 (Plekhh2), mRNA [NM_001191770] | <b>13,951</b> |
| Homer3       | Rattus norvegicus homer homolog 3 (Drosophila) (Homer3), mRNA [NM_053310]                                                     | <b>13,950</b> |
| Npff         | Rattus norvegicus neuropeptide FF-amide peptide precursor (Npff), mRNA [NM_022586]                                            | <b>13,949</b> |
| Radil        | Rattus norvegicus Ras association and DIL domains (Radil), mRNA [NM_001037218]                                                | <b>13,949</b> |
| 0            | Uncharacterized protein [Source:UniProtKB/TrEMBL;Acc:D3ZHI0] [ENSRNOT00000061428]                                             | <b>13,944</b> |
| Apol3        | Rattus norvegicus apolipoprotein L, 3 (Apol3), mRNA [NM_001013175]                                                            | <b>13,943</b> |
| LOC619574    | Rattus norvegicus hypothetical protein LOC619574 (LOC619574), mRNA [NM_001034959]                                             | <b>13,942</b> |
| Dio2         | Rattus norvegicus deiodinase, iodothyronine, type II (Dio2), mRNA [NM_031720]                                                 | <b>13,942</b> |
| Klhl30       | PREDICTED: Rattus norvegicus kelch-like 30 (Drosophila) (Klhl30), mRNA [XM_237394]                                            | <b>13,942</b> |
| Rdh11        | Rattus norvegicus retinol dehydrogenase 11 (all-trans/9-cis/11-cis) (Rdh11), mRNA [NM_001012193]                              | <b>13,940</b> |
| lqcf2        | PREDICTED: Rattus norvegicus IQ motif containing F2 (lqcf2), mRNA [XM_001070183]                                              | <b>13,939</b> |
| Olr733       | Rattus norvegicus olfactory receptor 733 (Olr733), mRNA [NM_001000618]                                                        | <b>13,939</b> |
| Fam149b1     | Rattus norvegicus family with sequence similarity 149, member B1 (Fam149b1), mRNA [NM_001013878]                              | <b>13,937</b> |
| LOC100294508 | Rattus norvegicus dyslexia susceptibility 2-like (LOC100294508), mRNA [NM_001159655]                                          | <b>13,937</b> |
| Pigm         | Rattus norvegicus phosphatidylinositol glycan anchor biosynthesis, class M (Pigm), mRNA [NM_024144]                           | <b>13,935</b> |

|            |                                                                                                                                          |               |
|------------|------------------------------------------------------------------------------------------------------------------------------------------|---------------|
| Tspan33    | Rattus norvegicus tetraspanin 33 (Tspan33), mRNA [NM_001109227]                                                                          | <b>13,935</b> |
| MAST1      | Rattus norvegicus microtubule associated serine/threonine kinase 1 (MAST1), mRNA [NM_181089]                                             | <b>13,931</b> |
| Ghrh       | Rattus norvegicus growth hormone releasing hormone (Ghrh), mRNA [NM_031577]                                                              | <b>13,931</b> |
| Anapc11    | Rattus norvegicus anaphase promoting complex subunit 11 (Anapc11), mRNA [NM_001126082]                                                   | <b>13,929</b> |
| Aldh4a1    | Rattus norvegicus aldehyde dehydrogenase 4 family, member A1 (Aldh4a1), nuclear gene encoding mitochondrial protein, mRNA [NM_001134698] | <b>13,928</b> |
| Phtf2      | Rattus norvegicus putative homeodomain transcription factor 2 (Phtf2), mRNA [NM_001106577]                                               | <b>13,927</b> |
| Cecr6      | PREDICTED: Rattus norvegicus cat eye syndrome chromosome region, candidate 6 homolog (human) (Cecr6), mRNA [XM_575656]                   | <b>13,924</b> |
| Lman2l     | VIP36-like protein [Source:RefSeq peptide;Acc:NP_001100370] [ENSRNOT00000021111]                                                         | <b>13,922</b> |
| Hiat1      | Rattus norvegicus hippocampus abundant gene transcript 1 (Hiat1), mRNA [NM_001106467]                                                    | <b>13,919</b> |
| Oxa1l      | Rattus norvegicus oxidase assembly 1-like (Oxa1l), mRNA [NM_001168583]                                                                   | <b>13,918</b> |
| 0          | Glyceraldehyde-3-phosphate dehydrogenase [Source:UniProtKB/TrEMBL;Acc:D3Z7Z7] [ENSRNOT00000038921]                                       | <b>13,918</b> |
| RGD1561318 | PREDICTED: Rattus norvegicus similar to SET domain-containing protein (RGD1561318), mRNA [XM_001066702]                                  | <b>13,915</b> |
| Slc39a14   | Rattus norvegicus solute carrier family 39 (zinc transporter), member 14 (Slc39a14), mRNA [NM_001107275]                                 | <b>13,914</b> |
| 0          | Uncharacterized protein [Source:UniProtKB/TrEMBL;Acc:D3ZH31] [ENSRNOT00000010612]                                                        | <b>13,912</b> |
| 0          | zinc finger protein 866 Gene [Source:MGI Symbol;Acc:MGI:3584369] [ENSRNOT00000034446]                                                    | <b>13,911</b> |
| Gpr180     | Rattus norvegicus G protein-coupled receptor 180 (Gpr180), mRNA [NM_001006994]                                                           | <b>13,905</b> |
| Nolc1      | Rattus norvegicus nucleolar and coiled-body phosphoprotein 1 (Nolc1), mRNA [NM_022869]                                                   | <b>13,903</b> |
| RGD1559917 | Rattus norvegicus similar to SMT3 suppressor of mif two 3 homolog 2 (LOC287993), mRNA [XM_212687]                                        | <b>13,902</b> |
| Ints7      | Rattus norvegicus integrator complex subunit 7 (Ints7), mRNA [NM_001191675]                                                              | <b>13,901</b> |
| Raver2     | Rattus norvegicus ribonucleoprotein, PTB-binding 2 (Raver2), mRNA [NM_001191867]                                                         | <b>13,901</b> |
| Vti1a      | Rattus norvegicus vesicle transport through interaction with t-SNAREs homolog 1A (yeast) (Vti1a), mRNA [NM_023101]                       | <b>13,900</b> |
| Gpr158     | Rattus norvegicus G protein-coupled receptor 158 (Gpr158), mRNA [NM_001170326]                                                           | <b>13,896</b> |
| RGD1563680 | Uncharacterized protein [Source:UniProtKB/TrEMBL;Acc:D3ZYC4] [ENSRNOT00000006177]                                                        | <b>13,895</b> |
| 0          | Unknown                                                                                                                                  | <b>13,895</b> |
| Tnrc6a     | Rattus norvegicus trinucleotide repeat containing 6a (Tnrc6a), mRNA [NM_001107549]                                                       | <b>13,893</b> |
| Nr2c2      | Rattus norvegicus nuclear receptor subfamily 2, group C, member 2 (Nr2c2), mRNA [NM_017323]                                              | <b>13,890</b> |
| Acta1      | Rattus norvegicus actin, alpha 1, skeletal muscle (Acta1), mRNA [NM_019212]                                                              | <b>13,888</b> |
| Ablim2     | Rattus norvegicus actin binding LIM protein family, member 2 (Ablim2), transcript variant 1, mRNA [NM_001177695]                         | <b>13,887</b> |
| 0          | Unknown                                                                                                                                  | <b>13,887</b> |
| Sox15      | Rattus norvegicus SRY (sex determining region Y)-box 15 (Sox15), mRNA [NM_001108830]                                                     | <b>13,885</b> |
| Gcc2       | Rattus norvegicus GRIP and coiled-coil domain containing 2 (Gcc2), mRNA [NM_001107633]                                                   | <b>13,885</b> |
| Lypd5      | Rattus norvegicus Ly6/Plaur domain containing 5 (Lypd5), mRNA [NM_001192010]                                                             | <b>13,881</b> |
| 0          | Q4BL67_BURVI (Q4BL67) Phospholipase/Carboxylesterase, partial (5%) [TC592585]                                                            | <b>13,881</b> |
| 0          | PREDICTED: Rattus norvegicus dynein, axonemal, heavy polypeptide 9 (Dnah9), mRNA [XM_002727722]                                          | <b>13,881</b> |

|            |                                                                                                                  |        |
|------------|------------------------------------------------------------------------------------------------------------------|--------|
| Znf496     | Rattus norvegicus similar to D130067D09 protein (LOC287361), mRNA [XM_220512]                                    | 13,880 |
| Cd47       | Rattus norvegicus Cd47 molecule (Cd47), mRNA [NM_019195]                                                         | 13,880 |
| Olr1714    | Rattus norvegicus olfactory receptor 1714 (Olr1714), mRNA [NM_214456]                                            | 13,877 |
| Fgfr1op2   | Rattus norvegicus FGFR1 oncogene partner 2 (Fgfr1op2), mRNA [NM_201421]                                          | 13,876 |
| Gipr       | Rattus norvegicus gastric inhibitory polypeptide receptor (Gipr), mRNA [NM_012714]                               | 13,875 |
| 0          | Uncharacterized protein [Source:UniProtKB/TrEMBL;Acc:D3ZI73] [ENSRNOT00000026047]                                | 13,875 |
| 0          | Unknown                                                                                                          | 13,874 |
| 0          | PREDICTED: Rattus norvegicus similar to SET domain-containing protein (RGD1561853), mRNA [XM_001064143]          | 13,871 |
| 0          | Unknown                                                                                                          | 13,871 |
| 0          | Unknown                                                                                                          | 13,870 |
| Ubr7       | Rattus norvegicus ubiquitin protein ligase E3 component n-recognin 7 (putative) (Ubr7), mRNA [NM_001007705]      | 13,870 |
| Nipa2      | Rattus norvegicus non imprinted in Prader-Willi/Angelman syndrome 2 homolog (human) (Nipa2), mRNA [NM_001107518] | 13,869 |
| 0          | Unknown                                                                                                          | 13,867 |
| Lpin1      | Rattus norvegicus lipin 1 (Lpin1), mRNA [NM_001012111]                                                           | 13,867 |
| RGD1312026 | Rattus norvegicus similar to RIKEN cDNA C230081A13 (RGD1312026), mRNA [NM_001108149]                             | 13,865 |
| Zfp868     | Rattus norvegicus zinc finger protein 868 (Zfp868), mRNA [NM_001009538]                                          | 13,864 |
| Tmem88     | Rattus norvegicus transmembrane protein 88 (Tmem88), mRNA [NM_001128155]                                         | 13,864 |
| Zc3h3      | Rattus norvegicus zinc finger CCCH type containing 3 (Zc3h3), mRNA [NM_001134865]                                | 13,863 |
| 0          | Unknown                                                                                                          | 13,861 |
| 0          | Unknown                                                                                                          | 13,857 |
| 0          | Unknown                                                                                                          | 13,855 |
| RGD1563982 | similar to F-box only protein 27 (RGD1563982), mRNA [Source:RefSeq DNA;Acc:NM_001110491] [ENSRNOT00000026997]    | 13,854 |
| Tmem43     | Rattus norvegicus transmembrane protein 43 (Tmem43), mRNA [NM_001007745]                                         | 13,854 |
| Spa17      | Rattus norvegicus sperm autoantigenic protein 17 (Spa17), mRNA [NM_053482]                                       | 13,852 |
| RGD1563888 | Rattus norvegicus similar to DNA segment, Chr 16, ERATO Doi 472, expressed (RGD1563888), mRNA [NM_001108312]     | 13,851 |
| Larp1      | BC001460 la related protein {Homo sapiens} (exp=-1; wgp=0; cg=0), partial (3%) [TC629660]                        | 13,850 |
| Capn6      | Rattus norvegicus calpain 6 (Capn6), mRNA [NM_031808]                                                            | 13,850 |
| Zfp426     | Rattus norvegicus zinc finger protein 426 (Zfp426), mRNA [NM_001079943]                                          | 13,849 |
| Mcf2l      | Rattus norvegicus MCF.2 cell line derived transforming sequence-like (Mcf2l), mRNA [NM_053951]                   | 13,847 |
| Cyb5d2     | Rattus norvegicus cytochrome b5 domain containing 2 (Cyb5d2), mRNA [NM_001007671]                                | 13,841 |
| lapp       | Islet amyloid polypeptide [Source:UniProtKB/Swiss-Prot;Acc:P12969] [ENSRNOT00000016614]                          | 13,838 |
| Aak1       | Rattus norvegicus AP2 associated kinase 1 (Aak1), mRNA [NM_001173450]                                            | 13,836 |
| Tfip11     | Rattus norvegicus tuftelin interacting protein 11 (Tfip11), mRNA [NM_001008291]                                  | 13,835 |
| 0          | Ubiquitin carboxyl-terminal hydrolase [Source:UniProtKB/TrEMBL;Acc:D3Z8K5] [ENSRNOT00000035084]                  | 13,834 |

|          |                                                                                                                                                                                       |        |
|----------|---------------------------------------------------------------------------------------------------------------------------------------------------------------------------------------|--------|
| Tbc1d14  | Rattus norvegicus TBC1 domain family, member 14 (Tbc1d14), transcript variant 1, mRNA [NM_001012152]                                                                                  | 13,833 |
| Mtpap    | Rattus norvegicus mitochondrial poly(A) polymerase (Mtpap), nuclear gene encoding mitochondrial protein, mRNA [NM_001107359]                                                          | 13,833 |
| 0        | Unknown                                                                                                                                                                               | 13,828 |
| Abhd8    | Rattus norvegicus abhydrolase domain containing 8 (Abhd8), mRNA [NM_001107301]                                                                                                        | 13,828 |
| Acvr2b   | Rattus norvegicus activin A receptor, type IIB (Acvr2b), mRNA [NM_031554]                                                                                                             | 13,826 |
| Sec63    | Rattus norvegicus SEC63 homolog (S. cerevisiae) (Sec63), mRNA [NM_001107637]                                                                                                          | 13,823 |
| Rab32    | Rattus norvegicus RAB32, member RAS oncogene family (Rab32), mRNA [NM_001108902]                                                                                                      | 13,821 |
| G7c      | Rattus norvegicus G7c protein (G7c), mRNA [NM_212499]                                                                                                                                 | 13,821 |
| Fam195b  | Rattus norvegicus family with sequence similarity 195, member B (Fam195b), mRNA [NM_001108311]                                                                                        | 13,820 |
| Lipf3    | Uncharacterized protein [Source:UniProtKB/TrEMBL;Acc:D4AA61] [ENSRNOT00000026219]                                                                                                     | 13,819 |
| Hsbp1    | Rattus norvegicus heat shock factor binding protein 1 (Hsbp1), mRNA [NM_173119]                                                                                                       | 13,818 |
| Fam65a   | Protein FAM65A [Source:UniProtKB/Swiss-Prot;Acc:Q4FZU8] [ENSRNOT00000023710]                                                                                                          | 13,817 |
| Elovl6   | Rattus norvegicus ELOVL family member 6, elongation of long chain fatty acids (yeast) (Elovl6), mRNA [NM_134383]                                                                      | 13,815 |
| 0        | Unknown                                                                                                                                                                               | 13,814 |
| Rnf39    | Rattus norvegicus ring finger protein 39 (Rnf39), mRNA [NM_134374]                                                                                                                    | 13,812 |
| Nrg1     | Rattus norvegicus neuregulin 1 (Nrg1), mRNA [NM_031588]                                                                                                                               | 13,811 |
| Ralbp1   | Rattus norvegicus ralA binding protein 1 (Ralbp1), mRNA [NM_032067]                                                                                                                   | 13,809 |
| Dip2c    | Rattus norvegicus DIP2 disco-interacting protein 2 homolog C (Drosophila) (Dip2c), mRNA [NM_001107360]                                                                                | 13,807 |
| Golph3   | Rattus norvegicus golgi phosphoprotein 3 (coat-protein) (Golph3), mRNA [NM_023977]                                                                                                    | 13,804 |
| Ndel1    | Rattus norvegicus nudE nuclear distribution gene E homolog (A. nidulans)-like 1 (Ndel1), mRNA [NM_133320]                                                                             | 13,804 |
| Ppm1l    | Rattus norvegicus protein phosphatase 1 (formerly 2C)-like (Ppm1l), mRNA [NM_001107681]                                                                                               | 13,798 |
| Arhgef12 | Rattus norvegicus Rho guanine nucleotide exchange factor (GEF) 12 (Arhgef12), mRNA [NM_001013246]                                                                                     | 13,798 |
| Dedd     | Rattus norvegicus death effector domain-containing (Dedd), mRNA [NM_031800]                                                                                                           | 13,796 |
| Ctbp2    | Rattus norvegicus C-terminal binding protein 2 (Ctbp2), mRNA [NM_053335]                                                                                                              | 13,796 |
| Arrdc3   | Rattus norvegicus arrestin domain containing 3 (Arrdc3), mRNA [NM_001007797]                                                                                                          | 13,795 |
| Dlgap1   | Rattus norvegicus discs, large (Drosophila) homolog-associated protein 1 (Dlgap1), mRNA [NM_022946]                                                                                   | 13,791 |
| Caprin1  | Rattus norvegicus cell cycle associated protein 1 (Caprin1), mRNA [NM_001012185]                                                                                                      | 13,791 |
| Son      | Rattus norvegicus Son DNA binding protein (Son), transcript variant 2, mRNA [NM_001170328]                                                                                            | 13,791 |
| Senp7    | Rattus norvegicus SUMO1/sentrin specific peptidase 7 (Senp7), mRNA [NM_001105888]                                                                                                     | 13,789 |
| Thap7    | Rattus norvegicus THAP domain containing 7 (Thap7), mRNA [NM_001105863]                                                                                                               | 13,789 |
| Atp5g2   | Rattus norvegicus ATP synthase, H <sup>+</sup> transporting, mitochondrial F0 complex, subunit C2 (subunit 9) (Atp5g2), nuclear gene encoding mitochondrial protein, mRNA [NM_133556] | 13,788 |
| Stag2    | Rattus norvegicus stromal antigen 2 (Stag2), mRNA [NM_001173507]                                                                                                                      | 13,782 |
| lldr2    | Uncharacterized protein [Source:UniProtKB/TrEMBL;Acc:D3ZGJ1] [ENSRNOT00000031367]                                                                                                     | 13,781 |



|            |                                                                                                                       |        |
|------------|-----------------------------------------------------------------------------------------------------------------------|--------|
| Stxbp6     | Rattus norvegicus syntaxin binding protein 6 (amisyn) (Stxbp6), mRNA [NM_001191872]                                   | 13,781 |
| LOC497952  | PREDICTED: Rattus norvegicus similar to Ubiquitin-associated protein 2-like (LOC497952), miscRNA [XR_005763]          | 13,780 |
| Tmem211    | Uncharacterized protein [Source:UniProtKB/TrEMBL;Acc:D3Z827] [ENSRNOT00000043717]                                     | 13,778 |
| 0          | Q571D7_MOUSE (Q571D7) MKIAA0268 protein (Fragment), partial (20%) [TC587453]                                          | 13,778 |
| Vps13b     | Rattus norvegicus vacuolar protein sorting 13 homolog B (yeast) (Vps13b), mRNA [NM_001134886]                         | 13,776 |
| 0          | RGD1304924 protein [Source:UniProtKB/TrEMBL;Acc:B0BNI8] [ENSRNOT00000064652]                                          | 13,775 |
| 0          | Unknown                                                                                                               | 13,773 |
| 0          | AA944379 EST199878 Normalized rat embryo, Bento Soares Rattus sp. cDNA clone REMAG24 3' end, mRNA sequence [AA944379] | 13,772 |
| RGD1310773 | Rattus norvegicus similar to hypothetical protein FLJ31810 (RGD1310773), mRNA [NM_001107926]                          | 13,771 |
| Fem1a      | Rattus norvegicus fem-1 homolog a (C. elegans) (Fem1a), mRNA [NM_001025706]                                           | 13,763 |
| Tgfbr2     | Rattus norvegicus transforming growth factor, beta receptor II (Tgfbr2), mRNA [NM_031132]                             | 13,759 |
| Trim16     | Rattus norvegicus tripartite motif-containing 16 (Trim16), mRNA [NM_001135033]                                        | 13,755 |
| Galt       | Rattus norvegicus galactose-1-phosphate uridylyltransferase (Galt), mRNA [NM_001013089]                               | 13,755 |
| Rxfp1      | Rattus norvegicus relaxin/insulin-like family peptide receptor 1 (Rxfp1), mRNA [NM_201417]                            | 13,753 |
| 0          | Unknown                                                                                                               | 13,753 |
| 0          | Uncharacterized protein [Source:UniProtKB/TrEMBL;Acc:D3ZJB6] [ENSRNOT00000040584]                                     | 13,753 |
| Dgat2l6    | Rattus norvegicus diacylglycerol O-acyltransferase 2-like 6 (Dgat2l6), mRNA [NM_001109370]                            | 13,753 |
| Dpp6       | Rattus norvegicus dipeptidylpeptidase 6 (Dpp6), mRNA [NM_022850]                                                      | 13,752 |
| Phka2      | Rattus norvegicus phosphorylase kinase, alpha 2 (Phka2), mRNA [NM_001190994]                                          | 13,751 |
| Rhobtb3    | Rattus norvegicus Rho-related BTB domain containing 3 (Rhobtb3), mRNA [NM_001107645]                                  | 13,751 |
| Ict1       | Rattus norvegicus immature colon carcinoma transcript 1 (Ict1), mRNA [NM_001191656]                                   | 13,749 |
| Il17d      | PREDICTED: Rattus norvegicus interleukin 17D (Il17d), mRNA [XM_001079675]                                             | 13,748 |
| 0          | Unknown                                                                                                               | 13,747 |
| Nptn       | Rattus norvegicus neuroplastin (Nptn), mRNA [NM_019380]                                                               | 13,747 |
| Zcchc2     | Rattus norvegicus zinc finger, CCHC domain containing 2 (Zcchc2), mRNA [NM_001122677]                                 | 13,744 |
| 0          | Catenin delta-2 [Source:UniProtKB/Swiss-Prot;Acc:O35116] [ENSRNOT00000044871]                                         | 13,743 |
| Ankrd13c   | Rattus norvegicus ankyrin repeat domain 13C (Ankrd13c), mRNA [NM_001191570]                                           | 13,736 |
| 0          | Unknown                                                                                                               | 13,731 |
| Thsd7b     | Rattus norvegicus thrombospondin, type I, domain containing 7B (Thsd7b), mRNA [NM_001191669]                          | 13,728 |
| Guca2a     | Rattus norvegicus guanylate cyclase activator 2a (guanylin) (Guca2a), mRNA [NM_013118]                                | 13,727 |
| Scyl2      | Rattus norvegicus SCY1-like 2 (S. cerevisiae) (Scyl2), mRNA [NM_001191780]                                            | 13,727 |
| Map1s      | Rattus norvegicus microtubule-associated protein 1S (Map1s), mRNA [NM_001106070]                                      | 13,726 |
| Fbxl19     | Rattus norvegicus F-box and leucine-rich repeat protein 19 (Fbxl19), mRNA [NM_001107552]                              | 13,725 |
| Olr1598    | Rattus norvegicus olfactory receptor 1598 (Olr1598), mRNA [NM_001000910]                                              | 13,723 |

|              |                                                                                                                                                          |               |
|--------------|----------------------------------------------------------------------------------------------------------------------------------------------------------|---------------|
| Porf-2       | Rattus norvegicus preoptic regulatory factor-2 (Porf-2), mRNA [NM_173122]                                                                                | <b>13,721</b> |
| Gls          | Rattus norvegicus glutaminase (Gls), nuclear gene encoding mitochondrial protein, transcript variant 1, mRNA [NM_012569]                                 | <b>13,720</b> |
| Kcnh3        | Rattus norvegicus potassium voltage-gated channel, subfamily H (eag-related), member 3 (Kcnh3), mRNA [NM_017108]                                         | <b>13,719</b> |
| Fam155a      | PREDICTED: Rattus norvegicus family with sequence similarity 155, member A (Fam155a), mRNA [XM_001076507]                                                | <b>13,718</b> |
| Suv420h1     | Rattus norvegicus suppressor of variegation 4-20 homolog 1 (Drosophila) (Suv420h1), mRNA [NM_001108512]                                                  | <b>13,713</b> |
| LOC684773    | PREDICTED: Rattus norvegicus similar to histone 2a (LOC684773), mRNA [XM_001071887]                                                                      | <b>13,712</b> |
| LOC100362255 | PREDICTED: Rattus norvegicus G protein-coupled receptor 98 (LOC100362255), mRNA [XM_002729130]                                                           | <b>13,708</b> |
| Pla2g4b      | Rattus norvegicus phospholipase A2, group IVB (cytosolic) (Pla2g4b), mRNA [NM_001107764]                                                                 | <b>13,708</b> |
| Gucy1a2      | Rattus norvegicus guanylate cyclase 1, soluble, alpha 2 (Gucy1a2), mRNA [NM_023956]                                                                      | <b>13,707</b> |
| Clip1        | Rattus norvegicus CAP-GLY domain containing linker protein 1 (Clip1), mRNA [NM_031745]                                                                   | <b>13,707</b> |
| Pex12        | Rattus norvegicus peroxisomal biogenesis factor 12 (Pex12), mRNA [NM_053921]                                                                             | <b>13,706</b> |
| LOC684993    | Rattus norvegicus hypothetical protein LOC684993 (LOC684993), mRNA [NM_001109451]                                                                        | <b>13,701</b> |
| 0            | Unknown                                                                                                                                                  | <b>13,698</b> |
| Casc4        | Uncharacterized protein [Source:UniProtKB/TrEMBL;Acc:D3Z812] [ENSRNOT00000038291]                                                                        | <b>13,698</b> |
| Gp1bb        | Rattus norvegicus glycoprotein Ib (platelet), beta polypeptide (Gp1bb), mRNA [NM_053930]                                                                 | <b>13,697</b> |
| Arrb1        | Rattus norvegicus arrestin, beta 1 (Arrb1), mRNA [NM_012910]                                                                                             | <b>13,696</b> |
| Nrsn2        | Rattus norvegicus neurensin 2 (Nrsn2), mRNA [NM_001109561]                                                                                               | <b>13,695</b> |
| Rbbp5        | Rattus norvegicus retinoblastoma binding protein 5 (Rbbp5), mRNA [NM_001107174]                                                                          | <b>13,693</b> |
| 0            | PREDICTED: Rattus norvegicus rCG53928-like (LOC100364438), mRNA [XM_002725571]                                                                           | <b>13,692</b> |
| Mylk         | Rattus norvegicus myosin light chain kinase (Mylk), mRNA [NM_001105874]                                                                                  | <b>13,691</b> |
| Strn         | Rattus norvegicus striatin, calmodulin binding protein (Strn), mRNA [NM_019148]                                                                          | <b>13,689</b> |
| Arl8b        | Rattus norvegicus ADP-ribosylation factor-like 8B (Arl8b), mRNA [NM_001024332]                                                                           | <b>13,688</b> |
| Cox11        | Rattus norvegicus COX11 homolog, cytochrome c oxidase assembly protein (yeast) (Cox11), nuclear gene encoding mitochondrial protein, mRNA [NM_001109575] | <b>13,686</b> |
| Rnf144b      | Rattus norvegicus ring finger protein 144B (Rnf144b), mRNA [NM_001108881]                                                                                | <b>13,684</b> |
| Sf3a1        | Rattus norvegicus splicing factor 3a, subunit 1 (Sf3a1), mRNA [NM_001107235]                                                                             | <b>13,681</b> |
| RGD1559682   | PREDICTED: Rattus norvegicus similar to peptidylprolyl isomerase A (cyclophilin A)) (RGD1559682), mRNA [XM_341363]                                       | <b>13,680</b> |
| Znf512b      | Rattus norvegicus zinc finger protein 512B (Znf512b), mRNA [NM_001107809]                                                                                | <b>13,680</b> |
| Pex11b       | Rattus norvegicus peroxisomal biogenesis factor 11 beta (Pex11b), mRNA [NM_001025684]                                                                    | <b>13,679</b> |
| 0            | Unknown                                                                                                                                                  | <b>13,673</b> |
| Slitrk1      | Rattus norvegicus SLIT and NTRK-like family, member 1 (Slitrk1), mRNA [NM_001107283]                                                                     | <b>13,673</b> |
| Srek1ip1     | Rattus norvegicus splicing regulatory glutamine/lysine-rich protein 1 interacting protein 1 (Srek1ip1), mRNA [NM_001008373]                              | <b>13,672</b> |
| Nkx3-1       | Rattus norvegicus NK3 homeobox 1 (Nkx3-1), mRNA [NM_001034144]                                                                                           | <b>13,671</b> |
| Commd6       | Rattus norvegicus COMM domain containing 6 (Commd6), mRNA [NM_001109105]                                                                                 | <b>13,670</b> |

|            |                                                                                                                                                   |               |
|------------|---------------------------------------------------------------------------------------------------------------------------------------------------|---------------|
| Mtmr2      | Rattus norvegicus myotubularin related protein 2 (Mtmr2), mRNA [NM_001108123]                                                                     | <b>13,668</b> |
| LOC499465  | Rattus norvegicus hypothetical protein LOC499465 (LOC499465), mRNA [NM_001025038]                                                                 | <b>13,667</b> |
| Gtpbp3     | tRNA modification GTPase GTPBP3, mitochondrial [Source:UniProtKB/Swiss-Prot;Acc:Q5PQQ1] [ENSRNOT00000060355]                                      | <b>13,666</b> |
| Fam198a    | AMGNNUC:TRBA2-00002-F12-WZE trba2 (10286) Rattus norvegicus cDNA clone trba2-00002-f12, mRNA sequence [CB606389]                                  | <b>13,665</b> |
| Ogn        | Rattus norvegicus osteoglycin (Ogn), mRNA [NM_001106103]                                                                                          | <b>13,663</b> |
| Ap1s1      | Rattus norvegicus adaptor-related protein complex 1, sigma 1 subunit (Ap1s1), mRNA [NM_001108331]                                                 | <b>13,663</b> |
| B3gnt1     | Rattus norvegicus UDP-GlcNAc:betaGal beta-1,3-N-acetylglucosaminyltransferase-like 1 (B3gnt1), mRNA [NM_001015035]                                | <b>13,659</b> |
| Rras2      | Rattus norvegicus related RAS viral (r-ras) oncogene homolog 2 (Rras2), mRNA [NM_001013434]                                                       | <b>13,658</b> |
| Trappc10   | Rattus norvegicus trafficking protein particle complex 10 (Trappc10), mRNA [NM_001173528]                                                         | <b>13,657</b> |
| Ddo        | Rattus norvegicus D-aspartate oxidase (Ddo), mRNA [NM_001109465]                                                                                  | <b>13,649</b> |
| RGD1562218 | Rattus norvegicus similar to RIKEN cDNA 0610039J04 (RGD1562218), mRNA [NM_001034919]                                                              | <b>13,646</b> |
| Rinl       | Rattus norvegicus Ras and Rab interactor-like (Rinl), mRNA [NM_001106241]                                                                         | <b>13,646</b> |
| Cln8       | Rattus norvegicus ceroid-lipofuscinosis, neuronal 8 (Cln8), mRNA [NM_001007686]                                                                   | <b>13,645</b> |
| 0          | Unknown                                                                                                                                           | <b>13,644</b> |
| Pnmt       | Rattus norvegicus phenylethanolamine-N-methyltransferase (Pnmt), mRNA [NM_031526]                                                                 | <b>13,639</b> |
| 0          | Unknown                                                                                                                                           | <b>13,638</b> |
| LOC680448  | Uncharacterized protein [Source:UniProtKB/TrEMBL;Acc:D4ACU2] [ENSRNOT00000060468]                                                                 | <b>13,637</b> |
| Ifit2      | Rattus norvegicus interferon-induced protein with tetratricopeptide repeats 2 (Ifit2), mRNA [NM_001024753]                                        | <b>13,636</b> |
| Yaf2       | Rattus norvegicus YY1 associated factor 2 (Yaf2), mRNA [NM_001134871]                                                                             | <b>13,636</b> |
| 0          | Unknown                                                                                                                                           | <b>13,634</b> |
| Peli1      | Rattus norvegicus pellino 1 (Peli1), mRNA [NM_001100565]                                                                                          | <b>13,633</b> |
| Gabrg1     | Rattus norvegicus gamma-aminobutyric acid (GABA) A receptor, gamma 1 (Gabrg1), mRNA [NM_080586]                                                   | <b>13,632</b> |
| 0          | PREDICTED: Rattus norvegicus similar to translocating chain-associating membrane protein 2, transcript variant 1 (LOC684534), mRNA [XM_001070862] | <b>13,625</b> |
| Abl2       | Rattus norvegicus v-abl Abelson murine leukemia viral oncogene homolog 2 (arg, Abelson-related gene) (Abl2), mRNA [NM_001107186]                  | <b>13,625</b> |
| 0          | PREDICTED: Rattus norvegicus TRAF domain and POZ/BTB containing protein T1-like (LOC100365687), partial mRNA [XM_002725996]                       | <b>13,623</b> |
| Ghr        | Rattus norvegicus growth hormone receptor (Ghr), mRNA [NM_017094]                                                                                 | <b>13,622</b> |
| Mphosph9   | Rattus norvegicus M-phase phosphoprotein 9 (Mphosph9), mRNA [NM_001170554]                                                                        | <b>13,621</b> |
| Nlr1       | Rattus norvegicus NLR family member X1 (Nlr1), mRNA [NM_001025010]                                                                                | <b>13,620</b> |
| 0          | Unknown                                                                                                                                           | <b>13,618</b> |
| Hrh2       | Rattus norvegicus histamine receptor H 2 (Hrh2), mRNA [NM_012965]                                                                                 | <b>13,616</b> |
| Wibg       | Rattus norvegicus within bgcn homolog (Drosophila) (Wibg), mRNA [NM_001108986]                                                                    | <b>13,616</b> |
| RGD1566033 | PREDICTED: Rattus norvegicus similar to BC003940 protein (RGD1566033), mRNA [XM_001070540]                                                        | <b>13,612</b> |
| Odz3       | Rattus norvegicus odz, odd Oz/ten-m homolog 3 (Drosophila) (Odz3), mRNA [NM_001169133]                                                            | <b>13,612</b> |

|            |                                                                                                                                                                                                                                                               |        |
|------------|---------------------------------------------------------------------------------------------------------------------------------------------------------------------------------------------------------------------------------------------------------------|--------|
| Npr2       | Rattus norvegicus natriuretic peptide receptor B/guanylate cyclase B (atrionatriuretic peptide receptor B) (Npr2), mRNA [NM_053838]                                                                                                                           | 13,612 |
| 0          | Unknown                                                                                                                                                                                                                                                       | 13,610 |
| Kitlg      | Rattus norvegicus KIT ligand (Kitlg), transcript variant 1, mRNA [NM_021843]                                                                                                                                                                                  | 13,609 |
| 0          | Uncharacterized protein [Source:UniProtKB/TrEMBL;Acc:D4A553] [ENSRNOT00000016227]                                                                                                                                                                             | 13,607 |
| 0          | Unknown                                                                                                                                                                                                                                                       | 13,606 |
| Ivd        | Rattus norvegicus isovaleryl coenzyme A dehydrogenase (Ivd), nuclear gene encoding mitochondrial protein, mRNA [NM_012592]                                                                                                                                    | 13,602 |
| 0          | Glyceraldehyde-3-phosphate dehydrogenase [Source:UniProtKB/TrEMBL;Acc:D3ZEN2] [ENSRNOT00000022122]                                                                                                                                                            | 13,602 |
| Nalcn      | Rattus norvegicus sodium leak channel, non-selective (Nalcn), mRNA [NM_153630]                                                                                                                                                                                | 13,600 |
| Gria3      | Rattus norvegicus glutamate receptor, ionotropic, AMPA 3 (Gria3), transcript variant 1, mRNA [NM_032990]                                                                                                                                                      | 13,599 |
| 0          | Unknown                                                                                                                                                                                                                                                       | 13,593 |
| 0          | Unknown                                                                                                                                                                                                                                                       | 13,591 |
| Tbc1d5     | Rattus norvegicus TBC1 domain family, member 5 (Tbc1d5), mRNA [NM_001134762]                                                                                                                                                                                  | 13,591 |
| Isoc2b     | Rattus norvegicus isochorismatase domain containing 2b (Isoc2b), mRNA [NM_001008367]                                                                                                                                                                          | 13,587 |
| Flt4       | Rattus norvegicus fms-related tyrosine kinase 4 (Flt4), mRNA [NM_053652]                                                                                                                                                                                      | 13,584 |
| Mt1a       | Rattus norvegicus metallothionein 1a (Mt1a), mRNA [NM_138826]                                                                                                                                                                                                 | 13,584 |
| LOC688146  | PREDICTED: Rattus norvegicus similar to radical S-adenosyl methionine domain containing 1 (LOC688146), mRNA [XM_001081294]                                                                                                                                    | 13,582 |
| Ctnbp2nl   | Rattus norvegicus CTTNBP2 N-terminal like (Ctnbp2nl), mRNA [NM_001107712]                                                                                                                                                                                     | 13,580 |
| Nkx2-5     | Rattus norvegicus NK2 transcription factor related, locus 5 (Drosophila) (Nkx2-5), mRNA [NM_053651]                                                                                                                                                           | 13,580 |
| Car14      | Rattus norvegicus carbonic anhydrase 14 (Car14), mRNA [NM_001109655]                                                                                                                                                                                          | 13,576 |
| Atp2b1     | Rattus norvegicus ATPase, Ca <sup>++</sup> transporting, plasma membrane 1 (Atp2b1), mRNA [NM_053311]                                                                                                                                                         | 13,575 |
| Frmpd4     | Rattus norvegicus FERM and PDZ domain containing 4 (Frmpd4), mRNA [NM_001106960]                                                                                                                                                                              | 13,575 |
| LOC684558  | AGENCOURT_113686907 NIH_MGC_431 Rattus norvegicus cDNA clone IMAGE:9088341 5', mRNA sequence [EV775254]                                                                                                                                                       | 13,572 |
| 0          | Rattus norvegicus similar to CG17293-PA (LOC289641), mRNA [XM_223435]                                                                                                                                                                                         | 13,571 |
| 0          | Uncharacterized protein [Source:UniProtKB/TrEMBL;Acc:D3ZP37] [ENSRNOT00000060917]                                                                                                                                                                             | 13,571 |
| Znf618     | PREDICTED: Rattus norvegicus zinc finger protein 618 (Znf618), mRNA [XM_233016]                                                                                                                                                                               | 13,567 |
| Atp11c-ps1 | Uncharacterized protein [Source:UniProtKB/TrEMBL;Acc:D3Z9J3] [ENSRNOT00000049120]                                                                                                                                                                             | 13,566 |
| 0          | Q3UXV4_MOUSE (Q3UXV4) 12 days embryo male wolffian duct includes surrounding region cDNA, RIKEN full-length enriched library, clone:6720421K10 product:protein phosphatase 3, catalytic subunit, beta isoform, full insert sequence, partial (47%) [TC597142] | 13,566 |
| Pik3r5     | Rattus norvegicus phosphoinositide-3-kinase, regulatory subunit 5 (Pik3r5), mRNA [NM_001191923]                                                                                                                                                               | 13,565 |
| Ano10      | PREDICTED: Rattus norvegicus anoctamin 10 (Ano10), mRNA [XM_236774]                                                                                                                                                                                           | 13,564 |
| Arpc2      | Rattus norvegicus actin related protein 2/3 complex, subunit 2 (Arpc2), mRNA [NM_001106919]                                                                                                                                                                   | 13,563 |
| Tmprss7    | Rattus norvegicus transmembrane serine protease 7 (Tmprss7), mRNA [NM_001105882]                                                                                                                                                                              | 13,561 |
| Grk4       | Rattus norvegicus G protein-coupled receptor kinase 4 (Grk4), mRNA [NM_022928]                                                                                                                                                                                | 13,560 |
| Eid2b      | PREDICTED: Rattus norvegicus similar to hypothetical protein FLJ38944 (RGD1560818), mRNA [XM_002725600]                                                                                                                                                       | 13,559 |

|           |                                                                                                                                                                             |               |
|-----------|-----------------------------------------------------------------------------------------------------------------------------------------------------------------------------|---------------|
| Alkbh5    | Uncharacterized protein [Source:UniProtKB/TrEMBL;Acc:D3ZKD3] [ENSRNOT00000034006]                                                                                           | <b>13,559</b> |
| 0         | Rattus norvegicus TL0AAA49YL04 mRNA sequence. [FQ213104]                                                                                                                    | <b>13,555</b> |
| Lmtk2     | Rattus norvegicus lemur tyrosine kinase 2 (Lmtk2), mRNA [NM_001137641]                                                                                                      | <b>13,553</b> |
| Kcng1     | Rattus norvegicus potassium voltage-gated channel, subfamily G, member 1 (Kcng1), mRNA [NM_001106545]                                                                       | <b>13,551</b> |
| Fam5b     | Rattus norvegicus family with sequence similarity 5, member B (Fam5b), mRNA [NM_173115]                                                                                     | <b>13,550</b> |
| Tnpo2     | Rattus norvegicus transportin 2 (Tnpo2), mRNA [NM_001107166]                                                                                                                | <b>13,548</b> |
| Pcdhg@    | Protocadherin-T1 [Source:UniProtKB/TrEMBL;Acc:Q9JIU6] [ENSRNOT00000067185]                                                                                                  | <b>13,547</b> |
| Slc39a6   | Rattus norvegicus solute carrier family 39 (zinc transporter), member 6 (Slc39a6), mRNA [NM_001024745]                                                                      | <b>13,546</b> |
| Ppp1r12b  | Rattus norvegicus protein phosphatase 1, regulatory (inhibitor) subunit 12B (Ppp1r12b), mRNA [NM_001107178]                                                                 | <b>13,545</b> |
| Trmt6     | Rattus norvegicus tRNA methyltransferase 6 homolog (S. cerevisiae) (Trmt6), mRNA [NM_001107779]                                                                             | <b>13,545</b> |
| Cenpq     | Rattus norvegicus centromere protein Q (Cenpq), mRNA [NM_001014215]                                                                                                         | <b>13,544</b> |
| Isg20I2   | Rattus norvegicus interferon stimulated exonuclease gene 20-like 2 (Isg20I2), mRNA [NM_001007741]                                                                           | <b>13,542</b> |
| 0         | Mitogen-activated protein kinase 4 [Source:UniProtKB/Swiss-Prot;Acc:Q63454] [ENSRNOT00000020851]                                                                            | <b>13,542</b> |
| EII       | Rattus norvegicus elongation factor RNA polymerase II (EII), mRNA [NM_001107304]                                                                                            | <b>13,541</b> |
| Serpina11 | Rattus norvegicus serine (or cysteine) peptidase inhibitor, clade A (alpha-1 antiproteinase, antitrypsin), member 11 (Serpina11), transcript variant 2, mRNA [NM_001166352] | <b>13,537</b> |
| Paqr9     | PREDICTED: Rattus norvegicus progesterin and adipoQ receptor family member IX (Paqr9), partial mRNA [XM_236503]                                                             | <b>13,536</b> |
| Tmem107   | Rattus norvegicus transmembrane protein 107 (Tmem107), mRNA [NM_001109648]                                                                                                  | <b>13,533</b> |
| Ndp       | Rattus norvegicus Norrie disease (pseudoglioma) (human) (Ndp), mRNA [NM_001108814]                                                                                          | <b>13,532</b> |
| Tgfb2     | Rattus norvegicus transforming growth factor, beta 2 (Tgfb2), mRNA [NM_031131]                                                                                              | <b>13,530</b> |
| LOC498675 | Rattus norvegicus hypothetical LOC498675 (LOC498675), mRNA [NM_001109113]                                                                                                   | <b>13,527</b> |
| 0         | sprouty homolog 3 [Source:RefSeq peptide;Acc:NP_001102533] [ENSRNOT00000011128]                                                                                             | <b>13,524</b> |
| Kcnc2     | Rattus norvegicus potassium voltage gated channel, Shaw-related subfamily, member 2 (Kcnc2), transcript variant a, mRNA [NM_139216]                                         | <b>13,524</b> |
| Nt5m      | Rattus norvegicus 5',3'-nucleotidase, mitochondrial (Nt5m), nuclear gene encoding mitochondrial protein, mRNA [NM_001105785]                                                | <b>13,523</b> |
| 0         | Unknown                                                                                                                                                                     | <b>13,522</b> |
| Spag8     | Rattus norvegicus sperm associated antigen 8 (Spag8), mRNA [NM_001173555]                                                                                                   | <b>13,521</b> |
| LOC690079 | Rattus norvegicus hypothetical protein LOC690079 (LOC690079), mRNA [NM_001109566]                                                                                           | <b>13,521</b> |
| 0         | fetal Alzheimer antigen [Source:RefSeq peptide;Acc:NP_001121007] [ENSRNOT00000055100]                                                                                       | <b>13,520</b> |
| Sumf1     | Rattus norvegicus sulfatase modifying factor 1 (Sumf1), mRNA [NM_001108639]                                                                                                 | <b>13,519</b> |
| Gnb1      | Rattus norvegicus guanine nucleotide binding protein (G protein), beta polypeptide 1 (Gnb1), mRNA [NM_030987]                                                               | <b>13,519</b> |
| Lsm3      | Rattus norvegicus LSM3 homolog, U6 small nuclear RNA associated (S. cerevisiae) (Lsm3), mRNA [NM_001106611]                                                                 | <b>13,515</b> |
| 0         | Unknown                                                                                                                                                                     | <b>13,513</b> |
| PVR       | Rattus norvegicus poliovirus receptor (PVR), mRNA [NM_017076]                                                                                                               | <b>13,513</b> |
| 0         | Unknown                                                                                                                                                                     | <b>13,508</b> |

|            |                                                                                                                                      |               |
|------------|--------------------------------------------------------------------------------------------------------------------------------------|---------------|
| Rpap1      | Rattus norvegicus RNA polymerase II associated protein 1 (Rpap1), mRNA [NM_001033999]                                                | <b>13,508</b> |
| Megf9      | Rattus norvegicus multiple EGF-like-domains 9 (Megf9), mRNA [NM_001107940]                                                           | <b>13,508</b> |
| Ddx42      | Rattus norvegicus DEAD (Asp-Glu-Ala-Asp) box polypeptide 42 (Ddx42), mRNA [NM_001107059]                                             | <b>13,508</b> |
| Rnf170     | PREDICTED: Rattus norvegicus ring finger protein 170 (Rnf170), mRNA [XM_001061874]                                                   | <b>13,507</b> |
| Tbc1d22a   | PREDICTED: Rattus norvegicus TBC1 domain family, member 22a (Tbc1d22a), mRNA [XM_001078492]                                          | <b>13,505</b> |
| Rabep2     | Rattus norvegicus rabaptin, RAB GTPase binding effector protein 2 (Rabep2), mRNA [NM_030585]                                         | <b>13,500</b> |
| 0          | Uncharacterized protein [Source:UniProtKB/TrEMBL;Acc:D4AAW3] [ENSRNOT00000055945]                                                    | <b>13,500</b> |
| LOC679580  | PREDICTED: Rattus norvegicus similar to MIC2 like 1 (LOC679580), mRNA [XM_001053578]                                                 | <b>13,500</b> |
| 0          | Uncharacterized protein [Source:UniProtKB/TrEMBL;Acc:D4ACX2] [ENSRNOT00000047604]                                                    | <b>13,500</b> |
| Txndc11    | Rattus norvegicus thioredoxin domain containing 11 (Txndc11), mRNA [NM_001127532]                                                    | <b>13,495</b> |
| 0          | Unknown                                                                                                                              | <b>13,494</b> |
| LOC684558  | PREDICTED: Rattus norvegicus similar to regulator of nonsense transcripts 1 (LOC684558), mRNA [XM_001070971]                         | <b>13,492</b> |
| Nav2       | Rattus norvegicus neuron navigator 2 (Nav2), mRNA [NM_138529]                                                                        | <b>13,487</b> |
| Ppp1r16b   | Rattus norvegicus protein phosphatase 1, regulatory (inhibitor) subunit 16B (Ppp1r16b), mRNA [NM_001191072]                          | <b>13,487</b> |
| Map4       | Rattus norvegicus microtubule-associated protein 4 (Map4), mRNA [NM_001024278]                                                       | <b>13,486</b> |
| Etv5       | Rattus norvegicus ets variant 5 (Etv5), mRNA [NM_001107082]                                                                          | <b>13,486</b> |
| Acsl4      | Rattus norvegicus acyl-CoA synthetase long-chain family member 4 (Acsl4), mRNA [NM_053623]                                           | <b>13,483</b> |
| Fkbp5      | Rattus norvegicus FK506 binding protein 5 (Fkbp5), mRNA [NM_001012174]                                                               | <b>13,483</b> |
| Schip1     | Rattus norvegicus schwannomin interacting protein 1 (Schip1), mRNA [NM_001100666]                                                    | <b>13,481</b> |
| Grik4      | Rattus norvegicus glutamate receptor, ionotropic, kainate 4 (Grik4), mRNA [NM_012572]                                                | <b>13,480</b> |
| Gpr26      | Rattus norvegicus G protein-coupled receptor 26 (Gpr26), mRNA [NM_138841]                                                            | <b>13,479</b> |
| Zhx2       | Zinc fingers and homeoboxes protein 2 [Source:UniProtKB/Swiss-Prot;Acc:Q80VX4] [ENSRNOT00000007326]                                  | <b>13,479</b> |
| RGD1564400 | Rattus norvegicus similar to Eukaryotic translation initiation factor 5 (eIF-5) (LOC295660), mRNA [XM_212955]                        | <b>13,478</b> |
| 0          | Unknown                                                                                                                              | <b>13,478</b> |
| Myo6       | PREDICTED: Rattus norvegicus myosin VI (Myo6), mRNA [XM_001061392]                                                                   | <b>13,474</b> |
| Lrp6       | Rattus norvegicus low density lipoprotein receptor-related protein 6 (Lrp6), mRNA [NM_001107892]                                     | <b>13,473</b> |
| RGD1308923 | Rattus norvegicus LOC362678 (RGD1308923), mRNA [NM_001108698]                                                                        | <b>13,473</b> |
| Hibch      | Rattus norvegicus 3-hydroxyisobutyryl-Coenzyme A hydrolase (Hibch), nuclear gene encoding mitochondrial protein, mRNA [NM_001013112] | <b>13,472</b> |
| Pnma2      | Rattus norvegicus paraneoplastic antigen MA2 (Pnma2), mRNA [NM_001107272]                                                            | <b>13,471</b> |
| Slc29a4    | Rattus norvegicus solute carrier family 29 (nucleoside transporters), member 4 (Slc29a4), mRNA [NM_001105911]                        | <b>13,470</b> |
| 0          | Uncharacterized protein [Source:UniProtKB/TrEMBL;Acc:D3ZES7] [ENSRNOT00000017536]                                                    | <b>13,466</b> |
| Rnls       | Rattus norvegicus renalase, FAD-dependent amine oxidase (Rnls), mRNA [NM_001014167]                                                  | <b>13,463</b> |
| Zfp748     | Rattus norvegicus TL0AAA77YJ08 mRNA sequence. [FQ211879]                                                                             | <b>13,462</b> |
| Tnrc6b     | Rattus norvegicus trinucleotide repeat containing 6B (Tnrc6b), mRNA [NM_138845]                                                      | <b>13,462</b> |

|            |                                                                                                                                                            |               |
|------------|------------------------------------------------------------------------------------------------------------------------------------------------------------|---------------|
| Sgcb       | Rattus norvegicus sarcoglycan, beta (dystrophin-associated glycoprotein) (Sgcb), mRNA [NM_001191068]                                                       | <b>13,461</b> |
| Trim65     | Rattus norvegicus tripartite motif-containing 65 (Trim65), mRNA [NM_001135714]                                                                             | <b>13,458</b> |
| Maged1     | Rattus norvegicus melanoma antigen, family D, 1 (Maged1), mRNA [NM_053409]                                                                                 | <b>13,458</b> |
| Plid2      | Rattus norvegicus phospholipase D2 (Plid2), mRNA [NM_033299]                                                                                               | <b>13,456</b> |
| Sema6b     | Rattus norvegicus sema domain, transmembrane domain (TM), and cytoplasmic domain, (semaphorin) 6B (Sema6b), mRNA [NM_053471]                               | <b>13,455</b> |
| Ddi2       | Rattus norvegicus DNA-damage inducible protein 2 (Ddi2), mRNA [NM_001034149]                                                                               | <b>13,452</b> |
| Hs2st1     | Rattus norvegicus heparan sulfate 2-O-sulfotransferase 1 (Hs2st1), mRNA [NM_001100518]                                                                     | <b>13,448</b> |
| 0          | Rattus norvegicus similar to hypothetical protein MGC31495 (LOC360655), mRNA [XM_340932]                                                                   | <b>13,446</b> |
| Dpy30      | Rattus norvegicus dpy-30 homolog (C. elegans) (Dpy30), transcript variant 1, mRNA [NM_173117]                                                              | <b>13,446</b> |
| Pitpna     | Rattus norvegicus phosphatidylinositol transfer protein, alpha (Pitpna), mRNA [NM_017231]                                                                  | <b>13,446</b> |
| Slc39a14   | Rattus norvegicus solute carrier family 39 (zinc transporter), member 14 (Slc39a14), mRNA [NM_001107275]                                                   | <b>13,445</b> |
| Mrrf       | Rattus norvegicus mitochondrial ribosome recycling factor (Mrrf), nuclear gene encoding mitochondrial protein, mRNA [NM_001008354]                         | <b>13,443</b> |
| Fam76b     | Rattus norvegicus family with sequence similarity 76, member B (Fam76b), mRNA [NM_001108994]                                                               | <b>13,443</b> |
| 0          | Unknown                                                                                                                                                    | <b>13,441</b> |
| Fbxo11     | Rattus norvegicus F-box protein 11 (Fbxo11), mRNA [NM_181631]                                                                                              | <b>13,440</b> |
| Jakmip3    | Rattus norvegicus janus kinase and microtubule interacting protein 3 (Jakmip3), mRNA [NM_001163277]                                                        | <b>13,438</b> |
| Amz2       | Rattus norvegicus archaelysin family metallopeptidase 2 (Amz2), mRNA [NM_001014121]                                                                        | <b>13,434</b> |
| Nrip3      | Rattus norvegicus nuclear receptor interacting protein 3 (Nrip3), mRNA [NM_001108498]                                                                      | <b>13,433</b> |
| 0          | Unknown                                                                                                                                                    | <b>13,431</b> |
| Rnf44      | Rattus norvegicus ring finger protein 44 (Rnf44), mRNA [NM_001024795]                                                                                      | <b>13,431</b> |
| Mkl1       | PREDICTED: Rattus norvegicus megakaryoblastic leukemia (translocation) 1 (Mkl1), mRNA [XM_001077101]                                                       | <b>13,430</b> |
| Crygd      | Rattus norvegicus crystallin, gamma D (Crygd), mRNA [NM_033095]                                                                                            | <b>13,424</b> |
| LOC688807  | PREDICTED: Rattus norvegicus hypothetical protein LOC688807 (LOC688807), mRNA [XM_001068381]                                                               | <b>13,424</b> |
| Dpagt1     | Rattus norvegicus dolichyl-phosphate (UDP-N-acetylglucosamine) N-acetylglucosaminophosphotransferase 1 (GlcNAc-1-P transferase) (Dpagt1), mRNA [NM_199388] | <b>13,423</b> |
| Fcho2      | Rattus norvegicus FCH domain only 2 (Fcho2), mRNA [NM_001191632]                                                                                           | <b>13,420</b> |
| Rras       | Rattus norvegicus Harvey rat sarcoma virus oncogene, subgroup R (Rras), mRNA [NM_001108481]                                                                | <b>13,419</b> |
| Ath1       | Uncharacterized protein [Source:UniProtKB/TrEMBL;Acc:D3ZR78] [ENSRNOT00000020004]                                                                          | <b>13,419</b> |
| Htr6       | Rattus norvegicus 5-hydroxytryptamine (serotonin) receptor 6 (Htr6), mRNA [NM_024365]                                                                      | <b>13,419</b> |
| Mapk1      | Rattus norvegicus mitogen activated protein kinase 1 (Mapk1), mRNA [NM_053842]                                                                             | <b>13,419</b> |
| RGD1308134 | Rattus norvegicus similar to RIKEN cDNA 1110020A23 (RGD1308134), mRNA [NM_001127521]                                                                       | <b>13,416</b> |
| 0          | Unknown                                                                                                                                                    | <b>13,414</b> |
| 0          | PREDICTED: Rattus norvegicus similar to glyceraldehyde-3-phosphate dehydrogenase (RGD1560826), mRNA [XM_001075200]                                         | <b>13,414</b> |
| LOC501224  | PREDICTED: Rattus norvegicus similar to RIKEN cDNA 2610042L04 (LOC501224), miscRNA [XR_005447]                                                             | <b>13,413</b> |

|            |                                                                                                                                               |               |
|------------|-----------------------------------------------------------------------------------------------------------------------------------------------|---------------|
| C1qtnf5    | Rattus norvegicus C1q and tumor necrosis factor related protein 5 (C1qtnf5), mRNA [NM_001012123]                                              | <b>13,411</b> |
| Wars2      | Rattus norvegicus tryptophanyl tRNA synthetase 2 (mitochondrial) (Wars2), nuclear gene encoding mitochondrial protein, mRNA [NM_001168641]    | <b>13,409</b> |
| Hrasls5    | Rattus norvegicus HRAS-like suppressor family, member 5 (Hrasls5), mRNA [NM_001039007]                                                        | <b>13,408</b> |
| Slc22a6    | Rattus norvegicus solute carrier family 22 (organic anion transporter), member 6 (Slc22a6), mRNA [NM_017224]                                  | <b>13,406</b> |
| Mlec       | Rattus norvegicus malectin (Mlec), mRNA [NM_001013983]                                                                                        | <b>13,404</b> |
| Kcnk4      | Rattus norvegicus potassium channel, subfamily K, member 4 (Kcnk4), mRNA [NM_053804]                                                          | <b>13,396</b> |
| Gpc5       | Rattus norvegicus glypican 5 (Gpc5), mRNA [NM_001107285]                                                                                      | <b>13,396</b> |
| 0          | Unknown                                                                                                                                       | <b>13,395</b> |
| Ptger3     | Rattus norvegicus prostaglandin E receptor 3 (subtype EP3) (Ptger3), mRNA [NM_012704]                                                         | <b>13,394</b> |
| 0          | Unknown                                                                                                                                       | <b>13,394</b> |
| Cntn6      | Rattus norvegicus contactin 6 (Cntn6), mRNA [NM_013225]                                                                                       | <b>13,390</b> |
| Pcp4       | Rattus norvegicus Purkinje cell protein 4 (Pcp4), mRNA [NM_013002]                                                                            | <b>13,390</b> |
| Slc18a1    | Rattus norvegicus solute carrier family 18 (vesicular monoamine), member 1 (Slc18a1), mRNA [NM_013152]                                        | <b>13,388</b> |
| Btg2       | Rattus norvegicus BTG family, member 2 (Btg2), mRNA [NM_017259]                                                                               | <b>13,387</b> |
| Gpx1       | Rattus norvegicus glutathione peroxidase 1 (Gpx1), mRNA [NM_030826]                                                                           | <b>13,385</b> |
| Ppp1r13b   | Rattus norvegicus protein phosphatase 1, regulatory (inhibitor) subunit 13B (Ppp1r13b), mRNA [NM_001108062]                                   | <b>13,384</b> |
| Pcyt1a     | Choline-phosphate cytidyltransferase A [Source:UniProtKB/Swiss-Prot;Acc:P19836] [ENSRNOT00000002403]                                          | <b>13,382</b> |
| Znf23      | Rattus norvegicus zinc finger protein 23 (KOX 16) (Znf23), mRNA [NM_001107428]                                                                | <b>13,382</b> |
| Ptprd      | PREDICTED: Rattus norvegicus protein tyrosine phosphatase, receptor type, D (Ptprd), mRNA [XM_233065]                                         | <b>13,380</b> |
| Dgcr8      | Rattus norvegicus DiGeorge syndrome critical region gene 8 (Dgcr8), mRNA [NM_001105865]                                                       | <b>13,380</b> |
| 0          | Unknown                                                                                                                                       | <b>13,379</b> |
| Mpst       | Rattus norvegicus mercaptopyruvate sulfurtransferase (Mpst), nuclear gene encoding mitochondrial protein, mRNA [NM_138843]                    | <b>13,379</b> |
| RGD1565095 | Rattus norvegicus similar to hypothetical protein MGC52110 (RGD1565095), mRNA [NM_001195488]                                                  | <b>13,378</b> |
| Apoc4      | Rattus norvegicus apolipoprotein C-IV (Apoc4), mRNA [NM_001109419]                                                                            | <b>13,377</b> |
| Rap2a      | Rattus norvegicus RAS related protein 2a (Rap2a), mRNA [NM_053741]                                                                            | <b>13,376</b> |
| Nppc       | Rattus norvegicus natriuretic peptide precursor C (Nppc), mRNA [NM_053750]                                                                    | <b>13,376</b> |
| Tbc1d5     | Rattus norvegicus TBC1 domain family, member 5 (Tbc1d5), mRNA [NM_001134762]                                                                  | <b>13,375</b> |
| Rnf167     | Rattus norvegicus ring finger protein 167 (Rnf167), mRNA [NM_001008361]                                                                       | <b>13,371</b> |
| Lrig1      | Uncharacterized protein [Source:UniProtKB/TrEMBL;Acc:D3ZD84] [ENSRNOT00000017384]                                                             | <b>13,369</b> |
| RGD1308154 | Uncharacterized protein [Source:UniProtKB/TrEMBL;Acc:D4ADL7] [ENSRNOT00000002356]                                                             | <b>13,367</b> |
| LOC361914  | Rattus norvegicus similar to solute carrier family 7 (cationic amino acid transporter, y+ system), member 12 (LOC361914), mRNA [NM_001017465] | <b>13,365</b> |
| Sar1b      | Rattus norvegicus SAR1 homolog B (S. cerevisiae) (Sar1b), mRNA [NM_001009622]                                                                 | <b>13,364</b> |
| Ppp1r3a    | Rattus norvegicus protein phosphatase 1, regulatory (inhibitor) subunit 3A (Ppp1r3a), mRNA [NM_001109222]                                     | <b>13,363</b> |



|           |                                                                                                                                      |               |
|-----------|--------------------------------------------------------------------------------------------------------------------------------------|---------------|
| Pigz      | Rattus norvegicus phosphatidylinositol glycan anchor biosynthesis, class Z (Pigz), mRNA [NM_001109525]                               | <b>13,360</b> |
| Megf11    | PREDICTED: Rattus norvegicus multiple EGF-like-domains 11 (Megf11), mRNA [XM_001078620]                                              | <b>13,358</b> |
| Map7d2    | PREDICTED: Rattus norvegicus MAP7 domain containing 2 (Map7d2), mRNA [XM_001054594]                                                  | <b>13,356</b> |
| Arhgef18  | Rattus norvegicus rho/rac guanine nucleotide exchange factor (GEF) 18 (Arhgef18), mRNA [NM_001107115]                                | <b>13,351</b> |
| Nkg7      | Rattus norvegicus natural killer cell group 7 sequence (Nkg7), mRNA [NM_133540]                                                      | <b>13,351</b> |
| Mapk1ip1l | Rattus norvegicus mitogen-activated protein kinase 1 interacting protein 1-like (Mapk1ip1l), mRNA [NM_001108373]                     | <b>13,348</b> |
| Slc11a2   | Rattus norvegicus solute carrier family 11 (proton-coupled divalent metal ion transporters), member 2 (Slc11a2), mRNA [NM_013173]    | <b>13,346</b> |
| 0         | Unknown                                                                                                                              | <b>13,346</b> |
| Col1a1    | Rattus norvegicus collagen, type I, alpha 1 (Col1a1), mRNA [NM_053304]                                                               | <b>13,345</b> |
| Tbc1d2b   | Rattus norvegicus TBC1 domain family, member 2B (Tbc1d2b), mRNA [NM_001108175]                                                       | <b>13,343</b> |
| Prokr2    | Rattus norvegicus prokineticin receptor 2 (Prokr2), mRNA [NM_138978]                                                                 | <b>13,343</b> |
| Nnt       | Rattus norvegicus nicotinamide nucleotide transhydrogenase (Nnt), nuclear gene encoding mitochondrial protein, mRNA [NM_001013157]   | <b>13,343</b> |
| LOC499602 | Rattus norvegicus hypothetical protein LOC499602 (LOC499602), mRNA [NM_001025039]                                                    | <b>13,342</b> |
| Cdipt     | Rattus norvegicus CDP-diacylglycerol--inositol 3-phosphatidyltransferase (phosphatidylinositol synthase) (Cdipt), mRNA [NM_138899]   | <b>13,341</b> |
| MGC72627  | Rattus norvegicus similar to RIKEN cDNA A330021E22, mRNA (cDNA clone MGC:72627 IMAGE:5600085), complete cds. [BC061963]              | <b>13,339</b> |
| Etv5      | Rattus norvegicus ets variant 5 (Etv5), mRNA [NM_001107082]                                                                          | <b>13,336</b> |
| Samsn1    | Rattus norvegicus SAM domain, SH3 domain and nuclear localization signals, 1 (Samsn1), mRNA [NM_130821]                              | <b>13,336</b> |
| Fam76a    | Rattus norvegicus family with sequence similarity 76, member A (Fam76a), mRNA [NM_001108686]                                         | <b>13,333</b> |
| Znf688    | Uncharacterized protein Zinc finger protein 688 (Predicted), isoform CRA_b [Source:UniProtKB/TrEMBL;Acc:D3ZAB7] [ENSRNOT00000024858] | <b>13,332</b> |
| Pdpk1     | Rattus norvegicus 3-phosphoinositide dependent protein kinase-1 (Pdpk1), mRNA [NM_031081]                                            | <b>13,330</b> |
| 0         | Rod-derived cone viability factor (RCG38817) [Source:UniProtKB/TrEMBL;Acc:B5LNR2] [ENSRNOT00000024434]                               | <b>13,329</b> |
| Mlx       | Rattus norvegicus MAX-like protein X (Mlx), mRNA [NM_001034112]                                                                      | <b>13,329</b> |
| Steap3    | Rattus norvegicus STEAP family member 3 (Steap3), mRNA [NM_133314]                                                                   | <b>13,329</b> |
| Polb      | DNA polymerase beta [Source:UniProtKB/Swiss-Prot;Acc:P06766] [ENSRNOT00000026039]                                                    | <b>13,327</b> |
| LOC680443 | PREDICTED: Rattus norvegicus hypothetical protein LOC680443 (LOC680443), mRNA [XM_002727352]                                         | <b>13,327</b> |
| 0         | Unknown                                                                                                                              | <b>13,326</b> |
| 0         | Unknown                                                                                                                              | <b>13,325</b> |
| Dos       | Rattus norvegicus downstream of Stk11 (Dos), mRNA [NM_001108070]                                                                     | <b>13,322</b> |
| Birc6     | Rattus norvegicus baculoviral IAP repeat-containing 6 (Birc6), mRNA [NM_001170596]                                                   | <b>13,320</b> |
| LOC691684 | PREDICTED: Rattus norvegicus similar to MIC2 like 1 (LOC691684), mRNA [XM_001079259]                                                 | <b>13,320</b> |
| Rgs7      | Rattus norvegicus regulator of G-protein signaling 7 (Rgs7), mRNA [NM_019343]                                                        | <b>13,319</b> |
| Fam49b    | Rattus norvegicus family with sequence similarity 49, member B (Fam49b), mRNA [NM_001126267]                                         | <b>13,318</b> |
| Rprd1a    | Uncharacterized protein [Source:UniProtKB/TrEMBL;Acc:D4AAU4] [ENSRNOT00000021624]                                                    | <b>13,318</b> |
| Casc5     | Rattus norvegicus cancer susceptibility candidate 5 (Casc5), mRNA [NM_001170594]                                                     | <b>13,316</b> |

|            |                                                                                                                                                                                        |        |
|------------|----------------------------------------------------------------------------------------------------------------------------------------------------------------------------------------|--------|
| Reep4      | Rattus norvegicus receptor accessory protein 4 (Reep4), mRNA [NM_001025279]                                                                                                            | 13,315 |
| Isl2       | Rattus norvegicus ISL LIM homeobox 2 (Isl2), mRNA [NM_020471]                                                                                                                          | 13,313 |
| 0          | Unknown                                                                                                                                                                                | 13,308 |
| Cnrip1     | Rattus norvegicus cannabinoid receptor interacting protein 1 (Cnrip1), mRNA [NM_001014232]                                                                                             | 13,306 |
| lcmt       | Rattus norvegicus isoprenylcysteine carboxyl methyltransferase (lcmt), mRNA [NM_133310]                                                                                                | 13,303 |
| Plxdc2     | Rattus norvegicus plexin domain containing 2 (Plxdc2), mRNA [NM_001108422]                                                                                                             | 13,301 |
| RGD1559643 | Rattus norvegicus similar to hypothetical protein A430031N04 (RGD1559643), mRNA [NM_001109056]                                                                                         | 13,300 |
| Tfpt       | Rattus norvegicus TCF3 (E2A) fusion partner (Tfpt), mRNA [NM_138870]                                                                                                                   | 13,297 |
| Gpkow      | Rattus norvegicus G patch domain and KOW motifs (Gpkow), mRNA [NM_001109381]                                                                                                           | 13,296 |
| 0          | Unknown                                                                                                                                                                                | 13,295 |
| Mcam       | Rattus norvegicus melanoma cell adhesion molecule (Mcam), transcript variant 1, mRNA [NM_023983]                                                                                       | 13,295 |
| 0          | Unknown                                                                                                                                                                                | 13,295 |
| Panx2      | Rattus norvegicus pannexin 2 (Panx2), mRNA [NM_199409]                                                                                                                                 | 13,295 |
| Lingo4     | Rattus norvegicus leucine rich repeat and Ig domain containing 4 (Lingo4), mRNA [NM_001109189]                                                                                         | 13,294 |
| Zfpm2      | Rattus norvegicus zinc finger protein, multitype 2 (Zfpm2), mRNA [NM_001130501]                                                                                                        | 13,292 |
| 0          | Unknown                                                                                                                                                                                | 13,291 |
| 0          | Uncharacterized protein [Source:UniProtKB/TrEMBL;Acc:D3ZDF2] [ENSRNOT00000042956]                                                                                                      | 13,287 |
| Slc25a16   | Rattus norvegicus solute carrier family 25 (mitochondrial carrier, Graves disease autoantigen), member 16 (Slc25a16), nuclear gene encoding mitochondrial protein, mRNA [NM_001100860] | 13,287 |
| 0          | AGENCOURT_109870696 NIH_MGC_418 Rattus norvegicus cDNA clone IMAGE:9022683 5', mRNA sequence [EV763695]                                                                                | 13,286 |
| Hyal1      | Rattus norvegicus hyaluronoglucosaminidase 1 (Hyal1), mRNA [NM_207616]                                                                                                                 | 13,283 |
| Limch1     | Rattus norvegicus LIM and calponin homology domains 1 (Limch1), mRNA [NM_001191678]                                                                                                    | 13,283 |
| LOC680813  | PREDICTED: Rattus norvegicus hypothetical protein LOC680813 (LOC680813), partial mRNA [XM_001058991]                                                                                   | 13,280 |
| Eif4ebp3   | Rattus norvegicus eukaryotic translation initiation factor 4E binding protein 3 (Eif4ebp3), mRNA [NM_001202552]                                                                        | 13,280 |
| 0          | Unknown                                                                                                                                                                                | 13,277 |
| Olr1051    | Rattus norvegicus olfactory receptor 1051 (Olr1051), mRNA [NM_001001364]                                                                                                               | 13,277 |
| 0          | Unknown                                                                                                                                                                                | 13,275 |
| Np         | Rattus norvegicus nucleoside phosphorylase (Np), mRNA [NM_001106031]                                                                                                                   | 13,274 |
| Spryd3     | Rattus norvegicus SPRY domain containing 3 (Spryd3), mRNA [NM_001191790]                                                                                                               | 13,273 |
| Plcb3      | Rattus norvegicus phospholipase C, beta 3 (phosphatidylinositol-specific) (Plcb3), mRNA [NM_033350]                                                                                    | 13,272 |
| Stau2      | Rattus norvegicus staufen, RNA binding protein, homolog 2 (Drosophila) (Stau2), transcript variant LS, mRNA [NM_134466]                                                                | 13,269 |
| Itgbl1     | Rattus norvegicus integrin, beta-like 1 (Itgbl1), mRNA [NM_001017505]                                                                                                                  | 13,268 |
| Hnrnpab    | Rattus norvegicus heterogeneous nuclear ribonucleoprotein A/B (Hnrnpab), mRNA [NM_031330]                                                                                              | 13,264 |
| LOC257650  | Rattus norvegicus hippyragranin (LOC257650), mRNA [NM_147142]                                                                                                                          | 13,264 |

|           |                                                                                                                                             |               |
|-----------|---------------------------------------------------------------------------------------------------------------------------------------------|---------------|
| Creb3l3   | Rattus norvegicus cAMP responsive element binding protein 3-like 3 (Creb3l3), mRNA [NM_001012115]                                           | <b>13,263</b> |
| Abce1     | Rattus norvegicus ATP-binding cassette, subfamily E (OABP), member 1 (Abce1), mRNA [NM_001108446]                                           | <b>13,263</b> |
| Pfkfb2    | Rattus norvegicus 6-phosphofructo-2-kinase/fructose-2,6-biphosphatase 2 (Pfkfb2), transcript variant 3, mRNA [NM_080477]                    | <b>13,261</b> |
| 0         | AB211061 ES cell associated transcript 8 {Mus musculus} (exp=-1; wgp=0; cg=0), partial (32%) [TC600461]                                     | <b>13,260</b> |
| Armc8     | Rattus norvegicus armadillo repeat containing 8 (Armc8), mRNA [NM_001173354]                                                                | <b>13,255</b> |
| Kif12     | Rattus norvegicus kinesin family member 12 (Kif12), mRNA [NM_001012102]                                                                     | <b>13,255</b> |
| 0         | Uncharacterized protein [Source:UniProtKB/TrEMBL;Acc:D3ZKR7] [ENSRNOT00000050021]                                                           | <b>13,255</b> |
| LOC690082 | PREDICTED: Rattus norvegicus similar to melanoma ubiquitous mutated protein (LOC690082), mRNA [XM_001073181]                                | <b>13,249</b> |
| Zfc3h1    | PREDICTED: Rattus norvegicus proline/serine-rich coiled-coil 2, transcript variant 2 (Psrc2), mRNA [XM_001078700]                           | <b>13,248</b> |
| Nans      | Rattus norvegicus N-acetylneuraminic acid synthase (Nans), mRNA [NM_001106655]                                                              | <b>13,247</b> |
| 0         | Calsyntenin-1 Soluble Alc-alphaCTF1-alpha [Source:UniProtKB/Swiss-Prot;Acc:Q6Q0N0] [ENSRNOT00000022100]                                     | <b>13,245</b> |
| Znf865    | Rattus norvegicus zinc finger protein 865 (Znf865), mRNA [NM_001134544]                                                                     | <b>13,241</b> |
| Znf574    | Rattus norvegicus zinc finger protein 574 (Znf574), mRNA [NM_001024258]                                                                     | <b>13,241</b> |
| 0         | Rattus norvegicus similar to glyceraldehyde-3-phosphate dehydrogenase (phosphorylating) (EC 1.2.1.12) - mouse (LOC363090), mRNA [XM_343421] | <b>13,238</b> |
| Fat1      | Rattus norvegicus FAT tumor suppressor homolog 1 (Drosophila) (Fat1), mRNA [NM_031819]                                                      | <b>13,236</b> |
| Aptx      | Rattus norvegicus aprataxin (Aptx), mRNA [NM_148889]                                                                                        | <b>13,235</b> |
| Pak1      | Rattus norvegicus p21 protein (Cdc42/Rac)-activated kinase 1 (Pak1), mRNA [NM_017198]                                                       | <b>13,233</b> |
| Ddt       | Rattus norvegicus D-dopachrome tautomerase (Ddt), mRNA [NM_024131]                                                                          | <b>13,232</b> |
| Eif4b     | Rattus norvegicus eukaryotic translation initiation factor 4B (Eif4b), mRNA [NM_001008324]                                                  | <b>13,232</b> |
| 0         | Unknown                                                                                                                                     | <b>13,232</b> |
| 0         | Unknown                                                                                                                                     | <b>13,219</b> |
| Olr297    | Rattus norvegicus olfactory receptor 297 (Olr297), mRNA [NM_001000234]                                                                      | <b>13,218</b> |
| 0         | Rattus norvegicus TL0ADA43YL03 mRNA sequence. [FQ220235]                                                                                    | <b>13,211</b> |
| 0         | Unknown                                                                                                                                     | <b>13,208</b> |
| Banp      | Rattus norvegicus Btg3 associated nuclear protein (Banp), mRNA [NM_001106191]                                                               | <b>13,207</b> |
| Rgs3      | Rattus norvegicus regulator of G-protein signaling 3 (Rgs3), mRNA [NM_019340]                                                               | <b>13,207</b> |
| 0         | Uncharacterized protein [Source:UniProtKB/TrEMBL;Acc:D3ZS52] [ENSRNOT00000050090]                                                           | <b>13,204</b> |
| 0         | AF326545 syntaxin binding protein 1 {Mus musculus} (exp=-1; wgp=0; cg=0), partial (5%) [TC627900]                                           | <b>13,204</b> |
| 0         | Rattus norvegicus perlecan mRNA, partial cds. [U75305]                                                                                      | <b>13,202</b> |
| Slc35a5   | Rattus norvegicus solute carrier family 35, member A5 (Slc35a5), mRNA [NM_001191927]                                                        | <b>13,199</b> |
| Rexo2     | Rattus norvegicus REX2, RNA exonuclease 2 homolog (S. cerevisiae) (Rexo2), mRNA [NM_001008326]                                              | <b>13,198</b> |
| Pcdhga11  | Rattus norvegicus protocadherin gamma subfamily A, 11 (Pcdhga11), mRNA [NM_001037153]                                                       | <b>13,197</b> |
| Noxo1     | Rattus norvegicus NADPH oxidase organizer 1 (Noxo1), mRNA [NM_001106986]                                                                    | <b>13,197</b> |

|            |                                                                                                                                            |               |
|------------|--------------------------------------------------------------------------------------------------------------------------------------------|---------------|
| Mfng       | Rattus norvegicus MFNG O-fucosylpeptide 3-beta-N-acetylglucosaminyltransferase (Mfng), mRNA [NM_199110]                                    | <b>13,196</b> |
| Nipa1      | Rattus norvegicus non imprinted in Prader-Willi/Angelman syndrome 1 homolog (human) (Nipa1), mRNA [NM_001107519]                           | <b>13,196</b> |
| Prkacb     | Rattus norvegicus protein kinase, cAMP dependent, catalytic, beta (Prkacb), mRNA [NM_001077645]                                            | <b>13,192</b> |
| RGD1304694 | Uncharacterized protein C22orf9 homolog [Source:UniProtKB/Swiss-Prot;Acc:Q4G008] [ENSRNOT00000042070]                                      | <b>13,192</b> |
| Lpcat1     | Rattus norvegicus lysophosphatidylcholine acyltransferase 1 (Lpcat1), mRNA [NM_001100735]                                                  | <b>13,182</b> |
| Mfsd9      | Rattus norvegicus major facilitator superfamily domain containing 9 (Mfsd9), mRNA [NM_001108215]                                           | <b>13,181</b> |
| Prkcdbp    | Rattus norvegicus protein kinase C, delta binding protein (Prkcdbp), mRNA [NM_134449]                                                      | <b>13,181</b> |
| Usp9x      | Rattus norvegicus ubiquitin specific peptidase 9, X-linked (Usp9x), transcript variant 1, mRNA [NM_001135893]                              | <b>13,180</b> |
| 0          | Unknown                                                                                                                                    | <b>13,179</b> |
| Cadm2      | Rattus norvegicus cell adhesion molecule 2 (Cadm2), mRNA [NM_001047102]                                                                    | <b>13,179</b> |
| Extl3      | Rattus norvegicus exostoses (multiple)-like 3 (Extl3), mRNA [NM_020097]                                                                    | <b>13,178</b> |
| 0          | RVL6921 Wackym-Soares normalized rat vestibular cDNA library Rattus norvegicus cDNA 5', mRNA sequence [DV716564]                           | <b>13,176</b> |
| Elk4       | Rattus norvegicus ELK4, ETS-domain protein (SRF accessory protein 1) (Elk4), mRNA [NM_001107173]                                           | <b>13,175</b> |
| Pdzd4      | Rattus norvegicus PDZ domain containing 4 (Pdzd4), mRNA [NM_001135836]                                                                     | <b>13,173</b> |
| Crmp1      | Rattus norvegicus collapsin response mediator protein 1 (Crmp1), mRNA [NM_012932]                                                          | <b>13,170</b> |
| 0          | UI-R-DZ1-cne-j-11-0-UI.s1 UI-R-DZ1 Rattus norvegicus cDNA clone UI-R-DZ1-cne-j-11-0-UI 3', mRNA sequence [CN543219]                        | <b>13,169</b> |
| LOC682999  | Rattus norvegicus hypothetical protein LOC682999 (LOC682999), mRNA [NM_001127600]                                                          | <b>13,169</b> |
| 0          | Thyroid hormone receptor associated protein 2 (Predicted)Uncharacterized protein [Source:UniProtKB/TrEMBL;Acc:D3ZJC6] [ENSRNOT00000042331] | <b>13,167</b> |
| 0          | Unknown                                                                                                                                    | <b>13,166</b> |
| Pragmin    | Rattus norvegicus pragma of Rnd2 (Pragmin), mRNA [NM_001107315]                                                                            | <b>13,166</b> |
| Stip1      | Rattus norvegicus stress-induced phosphoprotein 1 (Stip1), mRNA [NM_138911]                                                                | <b>13,162</b> |
| 0          | PREDICTED: Rattus norvegicus zinc finger protein 407 (Zfp407), mRNA [XM_001061052]                                                         | <b>13,162</b> |
| 0          | Unknown                                                                                                                                    | <b>13,158</b> |
| Zfp365     | Rattus norvegicus zinc finger protein 365 (Zfp365), mRNA [NM_001025145]                                                                    | <b>13,158</b> |
| RGD1563034 | PREDICTED: Rattus norvegicus similar to ETS domain transcription factor ERF (Ets2 repressor factor) (RGD1563034), mRNA [XM_218458]         | <b>13,157</b> |
| Grin2a     | Rattus norvegicus glutamate receptor, ionotropic, N-methyl D-aspartate 2A (Grin2a), mRNA [NM_012573]                                       | <b>13,156</b> |
| 0          | Glyceraldehyde-3-phosphate dehydrogenase [Source:UniProtKB/TrEMBL;Acc:D3ZME3] [ENSRNOT00000032908]                                         | <b>13,156</b> |
| Akt2       | Rattus norvegicus v-akt murine thymoma viral oncogene homolog 2 (Akt2), mRNA [NM_017093]                                                   | <b>13,151</b> |
| Zfp800     | Rattus norvegicus zinc finger protein 800 (Zfp800), mRNA [NM_001109225]                                                                    | <b>13,150</b> |
| Fcgbp1     | Rattus norvegicus Fc fragment of IgG binding protein-like 1 (Fcgbp1), mRNA [NM_001164656]                                                  | <b>13,149</b> |
| 0          | Unknown                                                                                                                                    | <b>13,145</b> |
| Tpm1       | Rattus norvegicus tropomyosin 1, alpha (Tpm1), transcript variant 1, mRNA [NM_001034068]                                                   | <b>13,141</b> |
| Adnp       | Rattus norvegicus activity-dependent neuroprotector homeobox (Adnp), mRNA [NM_022681]                                                      | <b>13,138</b> |

|           |                                                                                                                                   |               |
|-----------|-----------------------------------------------------------------------------------------------------------------------------------|---------------|
| 0         | BF521738 UI-R-C2-mt-d-06-0-UI.r2 UI-R-C2 Rattus norvegicus cDNA clone UI-R-C2-mt-d-06-0-UI 5', mRNA sequence [BF521738]           | <b>13,136</b> |
| C1galt1   | Rattus norvegicus core 1 synthase, glycoprotein-N-acetylgalactosamine 3-beta-galactosyltransferase, 1 (C1galt1), mRNA [NM_022950] | <b>13,135</b> |
| Gpr68     | Rattus norvegicus G protein-coupled receptor 68 (Gpr68), mRNA [NM_001108049]                                                      | <b>13,134</b> |
| LOC685079 | RCG32134, isoform CRA_aUncharacterized protein [Source:UniProtKB/TrEMBL;Acc:D3ZY25] [ENSRNOT00000030054]                          | <b>13,134</b> |
| LOC363306 | PREDICTED: Rattus norvegicus hypothetical protein LOC363306 (LOC363306), mRNA [XM_001068086]                                      | <b>13,131</b> |
| Myh10     | Rattus norvegicus myosin, heavy chain 10, non-muscle (Myh10), mRNA [NM_031520]                                                    | <b>13,129</b> |
| 0         | Unknown                                                                                                                           | <b>13,128</b> |
| Ppp2r5b   | Rattus norvegicus protein phosphatase 2, regulatory subunit B', beta isoform (Ppp2r5b), mRNA [NM_181379]                          | <b>13,127</b> |
| Gabarapl1 | Rattus norvegicus GABA(A) receptor-associated protein like 1 (Gabarapl1), mRNA [NM_001044294]                                     | <b>13,126</b> |
| 0         | Dedicator of cyto-kinesis 3 (Predicted)Uncharacterized protein [Source:UniProtKB/TrEMBL;Acc:D4A998] [ENSRNOT00000019867]          | <b>13,126</b> |
| 0         | Unknown                                                                                                                           | <b>13,125</b> |
| Shbg      | Rattus norvegicus sex hormone binding globulin (Shbg), mRNA [NM_012650]                                                           | <b>13,125</b> |
| Bin1      | Rattus norvegicus bridging integrator 1 (Bin1), mRNA [NM_053959]                                                                  | <b>13,123</b> |
| Fzd7      | Uncharacterized protein [Source:UniProtKB/TrEMBL;Acc:D4ADM3] [ENSRNOT00000033707]                                                 | <b>13,121</b> |
| Amigo1    | Rattus norvegicus adhesion molecule with Ig like domain 1 (Amigo1), mRNA [NM_206881]                                              | <b>13,120</b> |
| Stra6     | Rattus norvegicus stimulated by retinoic acid gene 6 (Stra6), mRNA [NM_001029924]                                                 | <b>13,117</b> |
| Met       | Rattus norvegicus met proto-oncogene (Met), mRNA [NM_031517]                                                                      | <b>13,117</b> |
| Spns2     | Rattus norvegicus spinster homolog 2 (Spns2), mRNA [NM_001144991]                                                                 | <b>13,117</b> |
| Ccl27     | Rattus norvegicus chemokine (C-C motif) ligand 27 (Ccl27), mRNA [NM_001108660]                                                    | <b>13,116</b> |
| Tmsb10    | Rattus norvegicus thymosin, beta 10 (Tmsb10), mRNA [NM_021261]                                                                    | <b>13,112</b> |
| Spc25     | Rattus norvegicus SPC25, NDC80 kinetochore complex component, homolog (S. cerevisiae) (Spc25), mRNA [NM_001009654]                | <b>13,111</b> |
| Pfkfb3    | Rattus norvegicus 6-phosphofructo-2-kinase/fructose-2,6-biphosphatase 3 (Pfkfb3), mRNA [NM_057135]                                | <b>13,111</b> |
| Kcnk9     | Rattus norvegicus potassium channel, subfamily K, member 9 (Kcnk9), mRNA [NM_053405]                                              | <b>13,110</b> |
| 0         | Unknown                                                                                                                           | <b>13,110</b> |
| 0         | Unknown                                                                                                                           | <b>13,109</b> |
| 0         | Unknown                                                                                                                           | <b>13,104</b> |
| Elavl4    | Rattus norvegicus ELAV (embryonic lethal, abnormal vision, Drosophila)-like 4 (Hu antigen D) (Elavl4), mRNA [NM_001077651]        | <b>13,103</b> |
| Cmtm4     | Rattus norvegicus CKLF-like MARVEL transmembrane domain containing 4 (Cmtm4), mRNA [NM_001172151]                                 | <b>13,103</b> |
| Zfp36l2   | Rattus norvegicus zinc finger protein 36, C3H type-like 2 (Zfp36l2), mRNA [NM_001036626]                                          | <b>13,102</b> |
| LOC688019 | Uncharacterized protein [Source:UniProtKB/TrEMBL;Acc:D3ZAX9] [ENSRNOT00000005443]                                                 | <b>13,102</b> |
| Fubp3     | Rattus norvegicus far upstream element (FUSE) binding protein 3 (Fubp3), mRNA [NM_001039337]                                      | <b>13,102</b> |
| Ksr1      | Rattus norvegicus kinase suppressor of ras 1 (Ksr1), mRNA [NM_001108284]                                                          | <b>13,100</b> |
| Olr528    | Rattus norvegicus olfactory receptor 528 (Olr528), mRNA [NM_001000319]                                                            | <b>13,099</b> |
| Asam      | Rattus norvegicus adipocyte-specific adhesion molecule (Asam), mRNA [NM_173154]                                                   | <b>13,098</b> |

|            |                                                                                                                                                           |               |
|------------|-----------------------------------------------------------------------------------------------------------------------------------------------------------|---------------|
| Pcdha2     | Rattus norvegicus protocadherin alpha 2 (Pcdha2), mRNA [NM_199504]                                                                                        | <b>13,097</b> |
| Inpp4a     | Rattus norvegicus inositol polyphosphate-4-phosphatase, type 1 (Inpp4a), mRNA [NM_031002]                                                                 | <b>13,097</b> |
| Siae       | Rattus norvegicus sialic acid acetyltransferase (Siae), mRNA [NM_001108759]                                                                               | <b>13,096</b> |
| 0          | Rattus norvegicus TL0AEA14YL01 mRNA sequence. [FQ227170]                                                                                                  | <b>13,096</b> |
| Pitx3      | Rattus norvegicus paired-like homeodomain 3 (Pitx3), mRNA [NM_019247]                                                                                     | <b>13,094</b> |
| Msi1       | Rattus norvegicus Musashi homolog 1(Drosophila) (Msi1), mRNA [NM_148890]                                                                                  | <b>13,093</b> |
| Unc119     | Rattus norvegicus UNC-119 homolog (C. elegans) (Unc119), mRNA [NM_017188]                                                                                 | <b>13,092</b> |
| Calhm2     | Rattus norvegicus calcium homeostasis modulator 2 (Calhm2), mRNA [NM_001008306]                                                                           | <b>13,092</b> |
| Mrm1       | Rattus norvegicus mitochondrial rRNA methyltransferase 1 homolog (S. cerevisiae) (Mrm1), nuclear gene encoding mitochondrial protein, mRNA [NM_001108832] | <b>13,086</b> |
| 0          | Unknown                                                                                                                                                   | <b>13,084</b> |
| 0          | Histone deacetylase 7 [Source:UniProtKB/Swiss-Prot;Acc:Q99P96] [ENSRNOT00000011159]                                                                       | <b>13,084</b> |
| 0          | Rattus norvegicus similar to olfactory receptor MOR111-1 (LOC288810), mRNA [XM_222344]                                                                    | <b>13,082</b> |
| Rps6ka3    | Rattus norvegicus ribosomal protein S6 kinase polypeptide 3 (Rps6ka3), mRNA [NM_001192004]                                                                | <b>13,079</b> |
| RGD1564657 | PREDICTED: Rattus norvegicus similar to cathepsin 1 precursor (RGD1564657), mRNA [XM_001065135]                                                           | <b>13,076</b> |
| Prkab1     | Rattus norvegicus protein kinase, AMP-activated, beta 1 non-catalytic subunit (Prkab1), mRNA [NM_031976]                                                  | <b>13,073</b> |
| Klf9       | Rattus norvegicus Kruppel-like factor 9 (Klf9), mRNA [NM_057211]                                                                                          | <b>13,073</b> |
| Fam96b     | Rattus norvegicus family with sequence similarity 96, member B (Fam96b), mRNA [NM_001144854]                                                              | <b>13,072</b> |
| RGD1562720 | Rattus norvegicus similar to hypothetical protein FLJ25369 (RGD1562720), mRNA [NM_001109240]                                                              | <b>13,071</b> |
| Tmem50b    | Rattus norvegicus transmembrane protein 50B (Tmem50b), mRNA [NM_001025014]                                                                                | <b>13,069</b> |
| Gprc5a     | Rattus norvegicus G protein-coupled receptor, family C, group 5, member A (Gprc5a), mRNA [NM_001079890]                                                   | <b>13,069</b> |
| Adamts7    | Rattus norvegicus ADAM metalloproteinase with thrombospondin type 1 motif, 7 (Adamts7), mRNA [NM_001047101]                                               | <b>13,068</b> |
| Plekhb2    | Rattus norvegicus pleckstrin homology domain containing, family B (evectins) member 2 (Plekhb2), mRNA [NM_001106899]                                      | <b>13,065</b> |
| 0          | Unknown                                                                                                                                                   | <b>13,063</b> |
| Entpd2     | Rattus norvegicus ectonucleoside triphosphate diphosphohydrolase 2 (Entpd2), mRNA [NM_172030]                                                             | <b>13,057</b> |
| Med12      | Rattus norvegicus mediator complex subunit 12 (Med12), mRNA [NM_001193292]                                                                                | <b>13,057</b> |
| Fgfr2      | Rattus norvegicus fibroblast growth factor receptor 2 (Fgfr2), transcript variant a, mRNA [NM_012712]                                                     | <b>13,056</b> |
| Adh4       | Rattus norvegicus alcohol dehydrogenase 4 (class II), pi polypeptide (Adh4), mRNA [NM_017270]                                                             | <b>13,056</b> |
| LOC361646  | Rattus norvegicus similar to K04F10.2 (LOC361646), mRNA [NM_001134574]                                                                                    | <b>13,055</b> |
| Mtss1      | Rattus norvegicus metastasis suppressor 1 (Mtss1), mRNA [NM_001130563]                                                                                    | <b>13,052</b> |
| 0          | predicted gene 101 Pseudogene [Source:MGI Symbol;Acc:MGI:2684947] [ENSRNOT00000039049]                                                                    | <b>13,052</b> |
| Prps1      | Rattus norvegicus phosphoribosyl pyrophosphate synthetase 1 (Prps1), mRNA [NM_017243]                                                                     | <b>13,052</b> |
| Trim62     | PREDICTED: Rattus norvegicus tripartite motif-containing 62 (Trim62), mRNA [XM_001060201]                                                                 | <b>13,052</b> |
| Psm11      | Rattus norvegicus proteasome (prosome, macropain) 26S subunit, non-ATPase, 11 (Psm11), mRNA [NM_001107027]                                                | <b>13,048</b> |

|            |                                                                                                                                        |               |
|------------|----------------------------------------------------------------------------------------------------------------------------------------|---------------|
| Pltp       | Rattus norvegicus phospholipid transfer protein (Pltp), mRNA [NM_001168543]                                                            | <b>13,043</b> |
| Acn9       | Rattus norvegicus ACN9 homolog ( <i>S. cerevisiae</i> ) (Acn9), mRNA [NM_001047914]                                                    | <b>13,043</b> |
| Narg1      | Rattus norvegicus NMDA receptor regulated 1 (Narg1), mRNA [NM_001107674]                                                               | <b>13,040</b> |
| Adck2      | Rattus norvegicus aarF domain containing kinase 2 (Adck2), mRNA [NM_001107855]                                                         | <b>13,040</b> |
| Meis3      | Rattus norvegicus Meis homeobox 3 (Meis3), mRNA [NM_001108472]                                                                         | <b>13,038</b> |
| Pfas       | Rattus norvegicus phosphoribosylformylglycinamide synthase (Pfas), mRNA [NM_001105791]                                                 | <b>13,038</b> |
| Itpkc      | Rattus norvegicus inositol 1,4,5-trisphosphate 3-kinase C (Itpkc), mRNA [NM_178094]                                                    | <b>13,037</b> |
| LOC682329  | PREDICTED: Rattus norvegicus similar to Homeobox protein Nkx-3.2 (Bagpipe homeobox protein homolog 1) (LOC682329), mRNA [XM_001061045] | <b>13,036</b> |
| Htra1      | Rattus norvegicus HtrA serine peptidase 1 (Htra1), mRNA [NM_031721]                                                                    | <b>13,035</b> |
| Cbx7       | Rattus norvegicus chromobox homolog 7 (Cbx7), mRNA [NM_199117]                                                                         | <b>13,033</b> |
| Cym        | Rattus norvegicus chymosin (Cym), mRNA [NM_020091]                                                                                     | <b>13,032</b> |
| 0          | PREDICTED: Rattus norvegicus adenomatosis polyposis coli down-regulated 1 (Apcdd1), mRNA [XM_001071384]                                | <b>13,028</b> |
| 0          | Unknown                                                                                                                                | <b>13,025</b> |
| 0          | Unknown                                                                                                                                | <b>13,025</b> |
| RGD1308601 | Rattus norvegicus similar to hypothetical protein (RGD1308601), mRNA [NM_001107374]                                                    | <b>13,024</b> |
| Clip1      | Rattus norvegicus CAP-GLY domain containing linker protein 1 (Clip1), mRNA [NM_031745]                                                 | <b>13,024</b> |
| Vom1r23    | Rattus norvegicus vomeronasal 1 receptor 23 (Vom1r23), mRNA [NM_001008941]                                                             | <b>13,024</b> |
| 0          | Unknown                                                                                                                                | <b>13,023</b> |
| Deaf1      | Rattus norvegicus deformed epidermal autoregulatory factor 1 ( <i>Drosophila</i> ) (Deaf1), mRNA [NM_031801]                           | <b>13,022</b> |
| RGD1562755 | Uncharacterized protein [Source:UniProtKB/TrEMBL;Acc:D3ZNM1] [ENSRNOT00000051559]                                                      | <b>13,021</b> |
| 0          | Rattus norvegicus zinc finger protein 1 (DZF1) mRNA, partial cds. [U78129]                                                             | <b>13,021</b> |
| Galp       | Rattus norvegicus galanin-like peptide (Galp), mRNA [NM_022633]                                                                        | <b>13,019</b> |
| Axin1      | Rattus norvegicus axin 1 (Axin1), mRNA [NM_024405]                                                                                     | <b>13,019</b> |
| 0          | Unknown                                                                                                                                | <b>13,018</b> |
| 0          | Unknown                                                                                                                                | <b>13,016</b> |
| Myo9a      | Rattus norvegicus myosin IXA (Myo9a), mRNA [NM_134335]                                                                                 | <b>13,015</b> |
| Cdkn3      | Rattus norvegicus cyclin-dependent kinase inhibitor 3 (Cdkn3), mRNA [NM_001106028]                                                     | <b>13,013</b> |
| Rec8       | Rattus norvegicus REC8 homolog (yeast) (Rec8), mRNA [NM_001011916]                                                                     | <b>13,008</b> |
| Map2k5     | Rattus norvegicus mitogen activated protein kinase kinase 5 (Map2k5), transcript variant 2, mRNA [NM_017246]                           | <b>13,007</b> |
| LOC683674  | PREDICTED: Rattus norvegicus similar to Protein C7orf26 homolog (LOC683674), mRNA [XM_001064018]                                       | <b>13,007</b> |
| 0          | Condensin complex subunit 2 [Source:UniProtKB/TrEMBL;Acc:D4A8M7] [ENSRNOT00000016157]                                                  | <b>13,003</b> |
| Tecpr1     | Rattus norvegicus tectonin beta-propeller repeat containing 1 (Tecpr1), mRNA [NM_001037191]                                            | <b>13,001</b> |
| Ubn2       | Rattus norvegicus ubinuclein 2 (Ubn2), mRNA [NM_001134553]                                                                             | <b>12,998</b> |

|              |                                                                                                                                                                   |               |
|--------------|-------------------------------------------------------------------------------------------------------------------------------------------------------------------|---------------|
| Rxrg         | Rattus norvegicus retinoid X receptor gamma (Rxrg), mRNA [NM_031765]                                                                                              | <b>12,995</b> |
| LOC680441    | Uncharacterized protein [Source:UniProtKB/TrEMBL;Acc:D3ZSR8] [ENSRNOT00000051510]                                                                                 | <b>12,995</b> |
| RGD1306286   | Uncharacterized protein [Source:UniProtKB/TrEMBL;Acc:D3ZLP7] [ENSRNOT00000022767]                                                                                 | <b>12,995</b> |
| Uqcc         | Rattus norvegicus ubiquinol-cytochrome c reductase complex chaperone (Uqcc), nuclear gene encoding mitochondrial protein, mRNA [NM_001109446]                     | <b>12,994</b> |
| 0            | Unknown                                                                                                                                                           | <b>12,992</b> |
| Dnm1         | Rattus norvegicus dynamin 1 (Dnm1), mRNA [NM_080689]                                                                                                              | <b>12,991</b> |
| Chchd5       | Rattus norvegicus coiled-coil-helix-coiled-coil-helix domain containing 5 (Chchd5), mRNA [NM_001106509]                                                           | <b>12,991</b> |
| 0            | Uncharacterized protein [Source:UniProtKB/TrEMBL;Acc:D3ZG23] [ENSRNOT00000046737]                                                                                 | <b>12,991</b> |
| LOC682967    | PREDICTED: Rattus norvegicus similar to Protein disulfide-isomerase TXNDC10 precursor (Thioredoxin domain-containing protein 10) (LOC682967), mRNA [XM_001063895] | <b>12,989</b> |
| Pprc1        | Rattus norvegicus peroxisome proliferator-activated receptor gamma, coactivator-related 1 (Pprc1), mRNA [NM_001106363]                                            | <b>12,985</b> |
| Dclre1c      | Rattus norvegicus DNA cross-link repair 1C, PSO2 homolog (S. cerevisiae) (Dclre1c), mRNA [NM_147145]                                                              | <b>12,983</b> |
| Magea11      | Rattus norvegicus melanoma antigen family A, 11 (Magea11), mRNA [NM_001013962]                                                                                    | <b>12,982</b> |
| Csnk2b       | Rattus norvegicus casein kinase 2, beta polypeptide (Csnk2b), transcript variant 1, mRNA [NM_031021]                                                              | <b>12,982</b> |
| 0            | Q80V97_MOUSE (Q80V97) Itga9 protein (Fragment), partial (67%) [TC615359]                                                                                          | <b>12,978</b> |
| Arl6ip1      | Rattus norvegicus ADP-ribosylation factor-like 6 interacting protein 1 (Arl6ip1), mRNA [NM_198737]                                                                | <b>12,976</b> |
| Ctdspl2      | Rattus norvegicus CTD (carboxy-terminal domain, RNA polymerase II, polypeptide A) small phosphatase like 2 (Ctdspl2), mRNA [NM_001014048]                         | <b>12,975</b> |
| 0            | Unknown                                                                                                                                                           | <b>12,973</b> |
| 0            | Unknown                                                                                                                                                           | <b>12,972</b> |
| Polr3g       | Rattus norvegicus polymerase (RNA) III (DNA directed) polypeptide G (Polr3g), mRNA [NM_001109468]                                                                 | <b>12,970</b> |
| Ring1        | Rattus norvegicus ring finger protein 1 (Ring1), mRNA [NM_212549]                                                                                                 | <b>12,969</b> |
| Leprot       | Rattus norvegicus leptin receptor overlapping transcript (Leprot), mRNA [NM_020099]                                                                               | <b>12,969</b> |
| Elf2         | Rattus norvegicus E74-like factor 2 (Elf2), transcript variant 2, mRNA [NM_001012181]                                                                             | <b>12,968</b> |
| Pyy          | Rattus norvegicus peptide YY (mapped) (Pyy), mRNA [NM_001034080]                                                                                                  | <b>12,967</b> |
| LOC100359999 | PREDICTED: Rattus norvegicus hypothetical protein LOC100359999 (LOC100359999), partial mRNA [XM_002729469]                                                        | <b>12,967</b> |
| Acadm        | Rattus norvegicus acyl-Coenzyme A dehydrogenase, C-4 to C-12 straight chain (Acadm), nuclear gene encoding mitochondrial protein, mRNA [NM_016986]                | <b>12,966</b> |
| 0            | Rattus norvegicus cDNA clone IMAGE:7318973. [BC091362]                                                                                                            | <b>12,966</b> |
| Zeb1         | Rattus norvegicus zinc finger E-box binding homeobox 1 (Zeb1), mRNA [NM_013164]                                                                                   | <b>12,964</b> |
| Dmd          | Rattus norvegicus dystrophin (Dmd), transcript variant Dp71a, mRNA [NM_012698]                                                                                    | <b>12,963</b> |
| Pptc7        | Rattus norvegicus PTC7 protein phosphatase homolog (S. cerevisiae) (Pptc7), mRNA [NM_001107141]                                                                   | <b>12,962</b> |
| RGD1304953   | Rattus norvegicus similar to SSTK-interacting protein (RGD1304953), mRNA [NM_001108556]                                                                           | <b>12,959</b> |
| Lrrn4cl      | Rattus norvegicus LRRN4 C-terminal like (Lrrn4cl), mRNA [NM_001109579]                                                                                            | <b>12,958</b> |



|         |                                                                                                                |        |
|---------|----------------------------------------------------------------------------------------------------------------|--------|
| Jph3    | Rattus norvegicus junctophilin 3 (Jph3), mRNA [NM_001107437]                                                   | 12,957 |
| Ephb1   | Rattus norvegicus Eph receptor B1 (Ephb1), mRNA [NM_001104528]                                                 | 12,955 |
| Scd1    | Rattus norvegicus stearyl-Coenzyme A desaturase 1 (Scd1), mRNA [NM_139192]                                     | 12,951 |
| Napg    | Rattus norvegicus N-ethylmaleimide-sensitive factor attachment protein, gamma (Napg), mRNA [NM_001107384]      | 12,951 |
| 0       | Unknown                                                                                                        | 12,950 |
| Pinx1   | Rattus norvegicus PIN2-interacting protein 1 (Pinx1), mRNA [NM_001083337]                                      | 12,942 |
| 0       | Q6QAQ5_PIG (Q6QAQ5) 60S ribosomal protein P1 (Fragment), partial (22%) [TC645425]                              | 12,940 |
| Grhl2   | Rattus norvegicus grainyhead-like 2 (Drosophila) (Grhl2), mRNA [NM_001134527]                                  | 12,940 |
| Bsdc1   | Rattus norvegicus BSD domain containing 1 (Bsdc1), mRNA [NM_001106636]                                         | 12,940 |
| 0       | Unknown                                                                                                        | 12,935 |
| Atg14   | Rattus norvegicus ATG14 autophagy related 14 homolog (S. cerevisiae) (Atg14), mRNA [NM_001107258]              | 12,934 |
| Plekha7 | Rattus norvegicus pleckstrin homology domain containing, family A member 7 (Plekha7), mRNA [NM_001144861]      | 12,930 |
| 0       | PREDICTED: Rattus norvegicus similar to MIC2 like 1 (LOC501437), partial mRNA [XM_001074315]                   | 12,930 |
| Fgd6    | Rattus norvegicus FYVE, RhoGEF and PH domain containing 6 (Fgd6), mRNA [NM_001137645]                          | 12,930 |
| Ntrk3   | Rattus norvegicus neurotrophic tyrosine kinase, receptor, type 3 (Ntrk3), mRNA [NM_019248]                     | 12,930 |
| Utp14a  | Rattus norvegicus UTP14, U3 small nucleolar ribonucleoprotein, homolog A (yeast) (Utp14a), mRNA [NM_001014113] | 12,927 |
| Ubiad1  | Rattus norvegicus UbiA prenyltransferase domain containing 1 (Ubiad1), mRNA [NM_001107993]                     | 12,927 |
| Ebp     | Rattus norvegicus emopamil binding protein (sterol isomerase) (Ebp), mRNA [NM_057137]                          | 12,923 |
| Kcnj9   | Rattus norvegicus potassium inwardly-rectifying channel, subfamily J, member 9 (Kcnj9), mRNA [NM_053834]       | 12,921 |
| 0       | Uncharacterized protein [Source:UniProtKB/TrEMBL;Acc:D3Z9L4] [ENSRNOT00000057467]                              | 12,921 |
| Otud7b  | Rattus norvegicus OTU domain containing 7B (Otud7b), mRNA [NM_001107697]                                       | 12,920 |
| Spred1  | Rattus norvegicus sprouty-related, EVH1 domain containing 1 (Spred1), mRNA [NM_001047089]                      | 12,918 |
| Car4    | Rattus norvegicus carbonic anhydrase 4 (Car4), mRNA [NM_019174]                                                | 12,917 |
| 0       | Unknown                                                                                                        | 12,916 |
| Chfr    | Rattus norvegicus checkpoint with forkhead and ring finger domains (Chfr), mRNA [NM_001009258]                 | 12,915 |
| Dusp3   | Rattus norvegicus dual specificity phosphatase 3 (Dusp3), mRNA [NM_001173376]                                  | 12,914 |
| Tmod2   | Rattus norvegicus tropomodulin 2 (Tmod2), mRNA [NM_031613]                                                     | 12,914 |
| Olr1688 | Rattus norvegicus olfactory receptor 1688 (Olr1688), mRNA [NM_001000275]                                       | 12,911 |
| Lyl1    | Rattus norvegicus lymphoblastic leukemia derived sequence 1 (Lyl1), mRNA [NM_001007677]                        | 12,911 |
| 0       | Uncharacterized protein [Source:UniProtKB/TrEMBL;Acc:D3ZI73] [ENSRNOT00000026047]                              | 12,908 |
| Itga4   | Rattus norvegicus integrin, alpha 4 (Itga4), mRNA [NM_001107737]                                               | 12,907 |
| Syt16   | Uncharacterized protein [Source:UniProtKB/TrEMBL;Acc:D3ZB68] [ENSRNOT00000012374]                              | 12,906 |
| Krt84   | Rattus norvegicus keratin 84 (Krt84), mRNA [NM_001008812]                                                      | 12,905 |
| Bzw1    | Rattus norvegicus basic leucine zipper and W2 domains 1 (Bzw1), mRNA [NM_198789]                               | 12,903 |

|            |                                                                                                                                                                                                                   |        |
|------------|-------------------------------------------------------------------------------------------------------------------------------------------------------------------------------------------------------------------|--------|
| Pcdhb9     | Rattus norvegicus protocadherin beta 9 (Pcdhb9), mRNA [NM_001109390]                                                                                                                                              | 12,903 |
| 0          | Uncharacterized protein [Source:UniProtKB/TrEMBL;Acc:D3ZRM8] [ENSRNOT00000018544]                                                                                                                                 | 12,902 |
| Dip2b      | PREDICTED: Rattus norvegicus DIP2 disco-interacting protein 2 homolog B (Drosophila) (Dip2b), mRNA [XM_001063280]                                                                                                 | 12,899 |
| Rcan1      | Rattus norvegicus regulator of calcineurin 1 (Rcan1), mRNA [NM_153724]                                                                                                                                            | 12,897 |
| 40603      | Rattus norvegicus membrane-associated ring finger (C3HC4) 11 (March11), mRNA [NM_001101828]                                                                                                                       | 12,897 |
| RGD1560470 | Uncharacterized protein [Source:UniProtKB/TrEMBL;Acc:D3ZTF0] [ENSRNOT00000040995]                                                                                                                                 | 12,895 |
| RGD1305235 | Rattus norvegicus similar to RIKEN cDNA 1700052N19 (RGD1305235), mRNA [NM_001017447]                                                                                                                              | 12,894 |
| 0          | Steroidogenic factor 1 [Source:UniProtKB/Swiss-Prot;Acc:P50569] [ENSRNOT00000042720]                                                                                                                              | 12,892 |
| Lxn        | Rattus norvegicus latexin (Lxn), mRNA [NM_031655]                                                                                                                                                                 | 12,889 |
| Dynll1     | Rattus norvegicus dynein light chain LC8-type 1 (Dynll1), mRNA [NM_053319]                                                                                                                                        | 12,887 |
| Crtc2      | Rattus norvegicus CREB regulated transcription coactivator 2 (Crtc2), mRNA [NM_001033895]                                                                                                                         | 12,885 |
| Cndp2      | Rattus norvegicus CNDP dipeptidase 2 (metallopeptidase M20 family) (Cndp2), mRNA [NM_001010920]                                                                                                                   | 12,884 |
| Pcdhga3    | Rattus norvegicus protocadherin gamma subfamily A, 3 (Pcdhga3), mRNA [NM_001037154]                                                                                                                               | 12,882 |
| 0          | Q3U6G1_MOUSE (Q3U6G1) Bone marrow macrophage cDNA, RIKEN full-length enriched library, clone:I830125G18 product:biliverdin reductase B (flavin reductase (NADPH)), full insert sequence, partial (78%) [TC609126] | 12,882 |
| 0          | PREDICTED: Rattus norvegicus similar to cactin CG1676-PA (LOC303590), miscRNA [XR_006385]                                                                                                                         | 12,881 |
| 0          | Unknown                                                                                                                                                                                                           | 12,880 |
| Lypd2      | Rattus norvegicus Ly6/Plaur domain containing 2 (Lypd2), mRNA [NM_001130545]                                                                                                                                      | 12,880 |
| 0          | Uncharacterized protein [Source:UniProtKB/TrEMBL;Acc:D3ZE32] [ENSRNOT00000015993]                                                                                                                                 | 12,877 |
| Tmem47     | Rattus norvegicus transmembrane protein 47 (Tmem47), mRNA [NM_001109317]                                                                                                                                          | 12,877 |
| Lrrc16a    | Rattus norvegicus leucine rich repeat containing 16A (Lrrc16a), mRNA [NM_001191692]                                                                                                                               | 12,876 |
| 0          | Q920N8_MOUSE (Q920N8) Protein kinase C thetall, partial (79%) [TC595074]                                                                                                                                          | 12,876 |
| Lyst       | Rattus norvegicus lysosomal trafficking regulator (Lyst), mRNA [NM_053518]                                                                                                                                        | 12,875 |
| LOC682033  | Rattus norvegicus similar to Protein phosphatase 2A, 59 kDa regulatory subunit B (PP2A PR59) (PP2A B-PR59) (LOC682033), mRNA [NM_001139492]                                                                       | 12,875 |
| Lin7c      | Rattus norvegicus lin-7 homolog C (C. elegans) (Lin7c), mRNA [NM_021851]                                                                                                                                          | 12,874 |
| 0          | Unknown                                                                                                                                                                                                           | 12,872 |
| Mpp3       | MAGUK p55 subfamily member 3 [Source:UniProtKB/Swiss-Prot;Acc:O88954] [ENSRNOT00000028264]                                                                                                                        | 12,872 |
| Slc22a12   | Rattus norvegicus solute carrier family 22 (organic anion/urate transporter), member 12 (Slc22a12), mRNA [NM_001034943]                                                                                           | 12,866 |
| RGD1562291 | PREDICTED: Rattus norvegicus similar to Human T-cell leukemia virus enhancer factor (Forkhead box protein N2) (RGD1562291), mRNA [XM_237502]                                                                      | 12,866 |
| Taf1       | Rattus norvegicus TAF1 RNA polymerase II, TATA box binding protein (TBP)-associated factor (Taf1), mRNA [NM_001191723]                                                                                            | 12,865 |
| Pafah1b1   | Rattus norvegicus platelet-activating factor acetylhydrolase, isoform 1b, subunit 1 (Pafah1b1), mRNA [NM_031763]                                                                                                  | 12,861 |
| 0          | Unknown                                                                                                                                                                                                           | 12,861 |

|            |                                                                                                                                     |        |
|------------|-------------------------------------------------------------------------------------------------------------------------------------|--------|
| 0          | Uncharacterized protein [Source:UniProtKB/TrEMBL;Acc:D3ZDX5] [ENSRNOT00000043345]                                                   | 12,859 |
| Chn1       | Rattus norvegicus chimerin (chimaerin) 1 (Chn1), mRNA [NM_032083]                                                                   | 12,854 |
| 0          | Unknown                                                                                                                             | 12,853 |
| Mdh2       | Rattus norvegicus malate dehydrogenase 2, NAD (mitochondrial) (Mdh2), nuclear gene encoding mitochondrial protein, mRNA [NM_031151] | 12,849 |
| 0          | Unknown                                                                                                                             | 12,844 |
| 0          | Unknown                                                                                                                             | 12,843 |
| LOC687270  | PREDICTED: Rattus norvegicus similar to glyceraldehyde-3-phosphate dehydrogenase (LOC687270), miscRNA [XR_085886]                   | 12,841 |
| Raly1      | Rattus norvegicus RALY RNA binding protein-like (Raly1), mRNA [NM_001024978]                                                        | 12,839 |
| Chd8       | Rattus norvegicus chromodomain helicase DNA binding protein 8 (Chd8), mRNA [NM_022933]                                              | 12,839 |
| Mkrn1      | Rattus norvegicus makorin ring finger protein 1 (Mkrn1), mRNA [NM_001004233]                                                        | 12,835 |
| RGD1563986 | Rattus norvegicus similar to RIKEN cDNA E330009J07 gene (RGD1563986), mRNA [NM_001044701]                                           | 12,834 |
| Tpo        | Rattus norvegicus thyroid peroxidase (Tpo), mRNA [NM_019353]                                                                        | 12,834 |
| Cap2       | Rattus norvegicus CAP, adenylate cyclase-associated protein, 2 (yeast) (Cap2), mRNA [NM_053874]                                     | 12,831 |
| Zfp187     | Uncharacterized protein [Source:UniProtKB/TrEMBL;Acc:D3ZFY2] [ENSRNOT00000024693]                                                   | 12,830 |
| 0          | Unknown                                                                                                                             | 12,828 |
| Adamts15   | Rattus norvegicus ADAM metallopeptidase with thrombospondin type 1 motif, 15 (Adamts15), mRNA [NM_001106810]                        | 12,827 |
| Rad23b     | Rattus norvegicus RAD23 homolog B (S. cerevisiae) (Rad23b), mRNA [NM_001025275]                                                     | 12,821 |
| Larp5      | Rattus norvegicus La ribonucleoprotein domain family, member 5 (Larp5), mRNA [NM_001107361]                                         | 12,820 |
| Pdik1l     | Rattus norvegicus PDLIM1 interacting kinase 1 like (Pdik1l), mRNA [NM_001107984]                                                    | 12,820 |
| Sgsm1      | small G protein signaling modulator 1 [Source:RefSeq peptide;Acc:NP_001099407] [ENSRNOT00000056824]                                 | 12,815 |
| Grhl1      | Uncharacterized protein [Source:UniProtKB/TrEMBL;Acc:D3ZZW4] [ENSRNOT00000038519]                                                   | 12,810 |
| Plcb2      | 1-phosphatidylinositol-4,5-bisphosphate phosphodiesterase beta-2 [Source:UniProtKB/Swiss-Prot;Acc:O89040] [ENSRNOT00000011911]      | 12,808 |
| Olr687     | Rattus norvegicus olfactory receptor 687 (Olr687), mRNA [NM_001000356]                                                              | 12,807 |
| Aer61      | Rattus norvegicus glycosyltransferase Aer61 (Aer61), mRNA [NM_001009502]                                                            | 12,803 |
| RGD1561849 | Rattus norvegicus similar to RIKEN cDNA 3110035E14 (RGD1561849), mRNA [NM_001109260]                                                | 12,802 |
| 0          | Oct 2 Pou-Homeo domain protein [Source:UniProtKB/TrEMBL;Acc:Q63388] [ENSRNOT00000027655]                                            | 12,802 |
| Pabpn1     | Rattus norvegicus poly(A) binding protein, nuclear 1 (Pabpn1), mRNA [NM_001135008]                                                  | 12,801 |
| Muc4       | PREDICTED: Rattus norvegicus mucin 4, cell surface associated (Muc4), mRNA [XM_221384]                                              | 12,801 |
| Ranbp1     | Rattus norvegicus RAN binding protein 1 (Ranbp1), mRNA [NM_001108324]                                                               | 12,800 |
| LOC684822  | PREDICTED: Rattus norvegicus similar to transcription elongation factor B (SIII), polypeptide 2 (LOC684822), mRNA [XM_002729867]    | 12,800 |
| Intu       | Uncharacterized protein [Source:UniProtKB/TrEMBL;Acc:D4ACE5] [ENSRNOT00000014116]                                                   | 12,796 |
| Rpp21      | Rattus norvegicus ribonuclease P 21 subunit (human) (Rpp21), mRNA [NM_001002831]                                                    | 12,796 |
| RGD1560527 | PREDICTED: Rattus norvegicus similar to serine/threonine kinase (RGD1560527), mRNA [XM_001055752]                                   | 12,794 |
| Mapk10     | Rattus norvegicus mitogen activated protein kinase 10 (Mapk10), mRNA [NM_012806]                                                    | 12,791 |

|            |                                                                                                                                     |        |
|------------|-------------------------------------------------------------------------------------------------------------------------------------|--------|
| Pdk3       | Rattus norvegicus pyruvate dehydrogenase kinase, isozyme 3 (Pdk3), nuclear gene encoding mitochondrial protein, mRNA [NM_001106581] | 12,790 |
| Nat15      | Rattus norvegicus N-acetyltransferase 15 (GCN5-related, putative) (Nat15), mRNA [NM_001014226]                                      | 12,785 |
| Cisd2      | Rattus norvegicus CDGSH iron sulfur domain 2 (Cisd2), mRNA [NM_001191608]                                                           | 12,785 |
| Trim7      | PREDICTED: Rattus norvegicus tripartite motif-containing 7, transcript variant 2 (Trim7), mRNA [XM_002724489]                       | 12,780 |
| Ppp3cc     | Rattus norvegicus protein phosphatase 3, catalytic subunit, gamma isoform (Ppp3cc), mRNA [NM_134367]                                | 12,780 |
| Lcat       | Rattus norvegicus lecithin cholesterol acyltransferase (Lcat), mRNA [NM_017024]                                                     | 12,780 |
| Efs        | Rattus norvegicus embryonal Fyn-associated substrate (Efs), mRNA [NM_001106033]                                                     | 12,780 |
| Ykt6       | Rattus norvegicus YKT6 v-SNARE homolog (S. cerevisiae) (Ykt6), mRNA [NM_031692]                                                     | 12,777 |
| Unc84b     | PREDICTED: Rattus norvegicus unc-84 homolog B (C. elegans) (Unc84b), mRNA [XM_235483]                                               | 12,777 |
| Rcvrn      | Rattus norvegicus recoverin (Rcvrn), mRNA [NM_080901]                                                                               | 12,776 |
| Cryga      | Rattus norvegicus crystallin, gamma A (Cryga), mRNA [NM_001080936]                                                                  | 12,775 |
| RGD1565117 | Uncharacterized protein [Source:UniProtKB/TrEMBL;Acc:D3ZJ54] [ENSRNOT00000045687]                                                   | 12,774 |
| Man2c1     | Rattus norvegicus mannosidase, alpha, class 2C, member 1 (Man2c1), mRNA [NM_139256]                                                 | 12,773 |
| Sgk196     | Rattus norvegicus protein kinase-like protein SgK196 (Sgk196), mRNA [NM_001024883]                                                  | 12,773 |
| LOC688657  | PREDICTED: Rattus norvegicus similar to Olfactory receptor 5D13 (LOC688657), mRNA [XM_001067781]                                    | 12,773 |
| Taok3      | Rattus norvegicus TAO kinase 3 (Taok3), mRNA [NM_001024254]                                                                         | 12,771 |
| Amigo2     | Rattus norvegicus adhesion molecule with Ig like domain 2 (Amigo2), mRNA [NM_182816]                                                | 12,766 |
| 0          | Unknown                                                                                                                             | 12,765 |
| Psrc1      | Rattus norvegicus proline/serine-rich coiled-coil 1 (Psrc1), mRNA [NM_001044302]                                                    | 12,762 |
| 0          | Unknown                                                                                                                             | 12,759 |
| Nr1i2      | Rattus norvegicus nuclear receptor subfamily 1, group I, member 2 (Nr1i2), mRNA [NM_052980]                                         | 12,757 |
| Nedd9      | Rattus norvegicus neural precursor cell expressed, developmentally down-regulated 9 (Nedd9), mRNA [NM_001011922]                    | 12,754 |
| Eif2s3x    | Rattus norvegicus eukaryotic translation initiation factor 2, subunit 3, structural gene X-linked (Eif2s3x), mRNA [NM_001100542]    | 12,753 |
| ST7        | Rattus norvegicus suppression of tumorigenicity 7 (ST7), transcript variant 1, mRNA [NM_001004102]                                  | 12,753 |
| Gnal       | Rattus norvegicus guanine nucleotide binding protein, alpha stimulating, olfactory type (Gnal), mRNA [NM_001191836]                 | 12,751 |
| Ces2a      | Rattus norvegicus carboxylesterase 2A (Ces2a), mRNA [NM_144743]                                                                     | 12,751 |
| Fosl1      | Rattus norvegicus fos-like antigen 1 (Fosl1), mRNA [NM_012953]                                                                      | 12,751 |
| Ppp2r3c    | Rattus norvegicus protein phosphatase 2, regulatory subunit B", gamma (Ppp2r3c), mRNA [NM_001014196]                                | 12,749 |
| Chd6       | Rattus norvegicus chromodomain helicase DNA binding protein 6 (Chd6), mRNA [NM_001107797]                                           | 12,749 |
| Adrbk2     | Rattus norvegicus adrenergic, beta, receptor kinase 2 (Adrbk2), mRNA [NM_012897]                                                    | 12,748 |
| LOC690096  | Uncharacterized protein [Source:UniProtKB/TrEMBL;Acc:D3ZEI0] [ENSRNOT00000012255]                                                   | 12,747 |
| Slmap      | Rattus norvegicus sarcolemma associated protein (Slmap), mRNA [NM_001106060]                                                        | 12,743 |
| Tbc1d20    | Rattus norvegicus TBC1 domain family, member 20 (Tbc1d20), mRNA [NM_001004281]                                                      | 12,743 |
| Mapt       | Rattus norvegicus microtubule-associated protein tau (Mapt), mRNA [NM_017212]                                                       | 12,740 |

|            |                                                                                                                                                                           |               |
|------------|---------------------------------------------------------------------------------------------------------------------------------------------------------------------------|---------------|
| RGD1304982 | Rattus norvegicus similar to RIKEN cDNA 2810025M15 (RGD1304982), mRNA [NM_001113775]                                                                                      | <b>12,739</b> |
| Ecel1      | Rattus norvegicus endothelin converting enzyme-like 1 (Ecel1), mRNA [NM_021776]                                                                                           | <b>12,739</b> |
| 0          | Uncharacterized protein [Source:UniProtKB/TrEMBL;Acc:D3ZC05] [ENSRNOT00000046525]                                                                                         | <b>12,739</b> |
| Ns5atp9    | Rattus norvegicus NS5A (hepatitis C virus) transactivated protein 9 (Ns5atp9), mRNA [NM_201418]                                                                           | <b>12,737</b> |
| 0          | Unknown                                                                                                                                                                   | <b>12,736</b> |
| Usp32      | Rattus norvegicus ubiquitin specific peptidase 32 (Usp32), mRNA [NM_001107032]                                                                                            | <b>12,735</b> |
| Slc4a8     | Rattus norvegicus solute carrier family 4, sodium bicarbonate cotransporter, member 8 (Slc4a8), mRNA [NM_199497]                                                          | <b>12,735</b> |
| Ret        | Rattus norvegicus ret proto-oncogene (Ret), transcript variant 2, mRNA [NM_001110099]                                                                                     | <b>12,730</b> |
| LOC685634  | RCG31132Uncharacterized protein [Source:UniProtKB/TrEMBL;Acc:D4ACP2] [ENSRNOT00000019224]                                                                                 | <b>12,729</b> |
| 0          | Rattus norvegicus similar to glyceraldehyde-3-phosphate dehydrogenase (phosphorylating) (EC 1.2.1.12) - mouse (LOC302809), mRNA [XM_229109]                               | <b>12,729</b> |
| Ap3m2      | Rattus norvegicus adaptor-related protein complex 3, mu 2 subunit (Ap3m2), mRNA [NM_133305]                                                                               | <b>12,729</b> |
| Epb4.1l5   | Rattus norvegicus erythrocyte protein band 4.1-like 5 (Epb4.1l5), mRNA [NM_001012023]                                                                                     | <b>12,729</b> |
| Col6a1     | PREDICTED: Rattus norvegicus collagen, type VI, alpha 1 (Col6a1), mRNA [XM_001079629]                                                                                     | <b>12,729</b> |
| Olr1002    | Rattus norvegicus olfactory receptor 1002 (Olr1002), mRNA [NM_001001371]                                                                                                  | <b>12,728</b> |
| Ankib1     | Rattus norvegicus ankyrin repeat and IBR domain containing 1 (Ankib1), mRNA [NM_001134781]                                                                                | <b>12,727</b> |
| RGD1305713 | Rattus norvegicus similar to RIKEN cDNA 3110040N11 (RGD1305713), mRNA [NM_001024749]                                                                                      | <b>12,727</b> |
| Nmt2       | Rattus norvegicus N-myristoyltransferase 2 (Nmt2), mRNA [NM_207590]                                                                                                       | <b>12,724</b> |
| Got2       | Rattus norvegicus glutamic-oxaloacetic transaminase 2, mitochondrial (aspartate aminotransferase 2) (Got2), nuclear gene encoding mitochondrial protein, mRNA [NM_013177] | <b>12,721</b> |
| Basp1      | Rattus norvegicus brain abundant, membrane attached signal protein 1 (Basp1), mRNA [NM_022300]                                                                            | <b>12,720</b> |
| 0          | Unknown                                                                                                                                                                   | <b>12,718</b> |
| Il33       | Rattus norvegicus interleukin 33 (Il33), mRNA [NM_001014166]                                                                                                              | <b>12,718</b> |
| Sema6c     | Rattus norvegicus sema domain, transmembrane domain (TM), and cytoplasmic domain, (semaphorin) 6C (Sema6c), mRNA [NM_017308]                                              | <b>12,716</b> |
| Fis1       | Rattus norvegicus fission 1 (mitochondrial outer membrane) homolog (S. cerevisiae) (Fis1), nuclear gene encoding mitochondrial protein, mRNA [NM_001105919]               | <b>12,712</b> |
| Fam32a     | Rattus norvegicus family with sequence similarity 32, member A (Fam32a), mRNA [NM_001128078]                                                                              | <b>12,710</b> |
| Fgfbp3     | Rattus norvegicus fibroblast growth factor binding protein 3 (Fgfbp3), mRNA [NM_001109165]                                                                                | <b>12,709</b> |
| Gpx2       | Rattus norvegicus glutathione peroxidase 2 (Gpx2), mRNA [NM_183403]                                                                                                       | <b>12,708</b> |
| RGD1563217 | Rattus norvegicus similar to RIKEN cDNA 4930451I11 (RGD1563217), mRNA [NM_001109155]                                                                                      | <b>12,706</b> |
| Usp30      | Rattus norvegicus ubiquitin specific peptidase 30 (Usp30), mRNA [NM_001107153]                                                                                            | <b>12,703</b> |
| C1ql2      | Rattus norvegicus complement component 1, q subcomponent-like 2 (C1ql2), mRNA [NM_001105949]                                                                              | <b>12,703</b> |
| 0          | Gdpd5 protein [Source:UniProtKB/TrEMBL;Acc:B5DF39] [ENSRNOT00000055321]                                                                                                   | <b>12,703</b> |
| 0          | Uncharacterized protein [Source:UniProtKB/TrEMBL;Acc:D3ZFK7] [ENSRNOT00000050217]                                                                                         | <b>12,703</b> |

|            |                                                                                                                                           |        |
|------------|-------------------------------------------------------------------------------------------------------------------------------------------|--------|
| Lass1      | Rattus norvegicus LAG1 homolog, ceramide synthase 1 (Lass1), mRNA [NM_001044230]                                                          | 12,700 |
| Bat1       | Rattus norvegicus HLA-B associated transcript 1 (Bat1), mRNA [NM_133300]                                                                  | 12,699 |
| Nfkb1      | Nuclear factor NF-kappa-B p105 subunitNuclear factor NF-kappa-B p50 subunit [Source:UniProtKB/Swiss-Prot;Acc:Q63369] [ENSRNOT00000036838] | 12,693 |
| Snx12      | Rattus norvegicus sorting nexin 12 (Snx12), mRNA [NM_001108817]                                                                           | 12,693 |
| Znf511     | Rattus norvegicus zinc finger protein 511 (Znf511), mRNA [NM_001106309]                                                                   | 12,692 |
| Brsk2      | PREDICTED: Rattus norvegicus brain serine/threonine kinase 2 (Brsk2), mRNA [XM_001063734]                                                 | 12,690 |
| Foxd4      | Forkhead box protein D4 [Source:UniProtKB/Swiss-Prot;Acc:Q63249] [ENSRNOT00000066752]                                                     | 12,689 |
| Gfra2      | Rattus norvegicus GDNF family receptor alpha 2 (Gfra2), mRNA [NM_012750]                                                                  | 12,687 |
| Hm13       | Rattus norvegicus histocompatibility 13 (Hm13), mRNA [NM_001107789]                                                                       | 12,687 |
| Rpl23a     | Rattus norvegicus ribosomal protein L23a (Rpl23a), mRNA [NM_001108283]                                                                    | 12,684 |
| LOC679580  | PREDICTED: Rattus norvegicus similar to MIC2 like 1 (LOC679580), mRNA [XM_001053578]                                                      | 12,684 |
| Kcnmb2     | Rattus norvegicus potassium large conductance calcium-activated channel, subfamily M, beta member 2 (Kcnmb2), mRNA [NM_176861]            | 12,681 |
| Eya2       | Rattus norvegicus eyes absent homolog 2 (Drosophila) (Eya2), mRNA [NM_130427]                                                             | 12,679 |
| Col9a1     | Rattus norvegicus collagen, type IX, alpha 1 (Col9a1), mRNA [NM_001100842]                                                                | 12,679 |
| Eif5       | Rattus norvegicus eukaryotic translation initiation factor 5 (Eif5), mRNA [NM_020075]                                                     | 12,678 |
| H2afy2     | Rattus norvegicus H2A histone family, member Y2 (H2afy2), mRNA [NM_001135807]                                                             | 12,678 |
| Ppp2r2a    | Rattus norvegicus protein phosphatase 2 (formerly 2A), regulatory subunit B, alpha isoform (Ppp2r2a), mRNA [NM_053999]                    | 12,676 |
| Colq       | Acetylcholinesterase collagenic tail peptide [Source:UniProtKB/Swiss-Prot;Acc:O35167] [ENSRNOT00000026550]                                | 12,674 |
| Bmpr2      | Rattus norvegicus bone morphogenetic protein receptor, type II (serine/threonine kinase) (Bmpr2), mRNA [NM_080407]                        | 12,673 |
| Cyb5r1     | Rattus norvegicus cytochrome b5 reductase 1 (Cyb5r1), mRNA [NM_001013126]                                                                 | 12,673 |
| 0          | Uncharacterized protein [Source:UniProtKB/TrEMBL;Acc:D3ZDF4] [ENSRNOT00000024704]                                                         | 12,672 |
| LOC684755  | PREDICTED: Rattus norvegicus similar to zinc finger like protein 1, transcript variant 3 (LOC684755), mRNA [XM_001075288]                 | 12,670 |
| LOC688452  | Rattus norvegicus hypothetical protein LOC688452 (LOC688452), mRNA [NM_001135720]                                                         | 12,668 |
| Tmem136    | Rattus norvegicus transmembrane protein 136 (Tmem136), mRNA [NM_001108136]                                                                | 12,668 |
| 0          | Unknown                                                                                                                                   | 12,666 |
| Tmem134    | Rattus norvegicus transmembrane protein 134 (Tmem134), transcript variant 2, mRNA [NM_001078648]                                          | 12,666 |
| 0          | Unknown                                                                                                                                   | 12,665 |
| Mtmr9      | Rattus norvegicus myotubularin related protein 9 (Mtmr9), mRNA [NM_001005761]                                                             | 12,660 |
| RGD1563870 | PREDICTED: Rattus norvegicus similar to CG3104-PA, isoform A (RGD1563870), miscRNA [XR_086302]                                            | 12,656 |
| 0          | Unknown                                                                                                                                   | 12,654 |
| Aagab      | Rattus norvegicus alpha- and gamma-adaptin binding protein (Aagab), mRNA [NM_134398]                                                      | 12,651 |
| 0          | Unknown                                                                                                                                   | 12,647 |
| RGD1562174 | Uncharacterized protein [Source:UniProtKB/TrEMBL;Acc:D3Z8I3] [ENSRNOT00000038543]                                                         | 12,647 |

|           |                                                                                                                                                     |               |
|-----------|-----------------------------------------------------------------------------------------------------------------------------------------------------|---------------|
| Mrps18b   | Rattus norvegicus mitochondrial ribosomal protein S18B (Mrps18b), nuclear gene encoding mitochondrial protein, mRNA [NM_212534]                     | <b>12,646</b> |
| Fbxo7     | Rattus norvegicus F-box protein 7 (Fbxo7), mRNA [NM_001012222]                                                                                      | <b>12,644</b> |
| Bok       | Rattus norvegicus BCL2-related ovarian killer (Bok), mRNA [NM_017312]                                                                               | <b>12,643</b> |
| 0         | Q6GQU6_MOUSE (Q6GQU6) CDNA sequence BC072620, partial (56%) [TC612613]                                                                              | <b>12,642</b> |
| Lyg2      | PREDICTED: Rattus norvegicus lysozyme G-like 2 (Lyg2), mRNA [XM_578787]                                                                             | <b>12,642</b> |
| Narf      | Rattus norvegicus nuclear prelamin A recognition factor (Narf), mRNA [NM_001039207]                                                                 | <b>12,641</b> |
| Rsb66     | Rattus norvegicus Rsb-66 protein (Rsb66), mRNA [NM_181694]                                                                                          | <b>12,639</b> |
| Wbscr27   | Rattus norvegicus Williams Beuren syndrome chromosome region 27 (Wbscr27), mRNA [NM_001109499]                                                      | <b>12,639</b> |
| Adamts12  | Rattus norvegicus ADAM metallopeptidase with thrombospondin type 1 motif, 12 (Adamts12), mRNA [NM_001106420]                                        | <b>12,638</b> |
| 0         | Unknown                                                                                                                                             | <b>12,633</b> |
| Homer1    | Rattus norvegicus homer homolog 1 (Drosophila) (Homer1), mRNA [NM_031707]                                                                           | <b>12,631</b> |
| Apoc1     | Rattus norvegicus apolipoprotein C-I (Apoc1), transcript variant 1, mRNA [NM_012824]                                                                | <b>12,629</b> |
| Nell2     | Rattus norvegicus NEL-like 2 (chicken) (Nell2), mRNA [NM_031070]                                                                                    | <b>12,629</b> |
| Eif1ay    | Rattus norvegicus eukaryotic translation initiation factor 1A, Y-linked (Eif1ay), mRNA [NM_001106963]                                               | <b>12,627</b> |
| 0         | Unknown                                                                                                                                             | <b>12,626</b> |
| Slc2a1    | Rattus norvegicus solute carrier family 2 (facilitated glucose transporter), member 1 (Slc2a1), mRNA [NM_138827]                                    | <b>12,625</b> |
| Olr1509   | Rattus norvegicus olfactory receptor 1509 (Olr1509), mRNA [NM_001000528]                                                                            | <b>12,624</b> |
| 0         | AW918633 EST349937 Rat gene index, normalized rat, norvegicus, Bento Soares Rattus norvegicus cDNA clone RGIEV66 5' end, mRNA sequence [AW918633]   | <b>12,623</b> |
| 0         | Unknown                                                                                                                                             | <b>12,622</b> |
| Orai2     | Rattus norvegicus ORAI calcium release-activated calcium modulator 2 (Orai2), mRNA [NM_001170403]                                                   | <b>12,620</b> |
| Dhtkd1    | Rattus norvegicus dehydrogenase E1 and transketolase domain containing 1 (Dhtkd1), nuclear gene encoding mitochondrial protein, mRNA [NM_001025720] | <b>12,618</b> |
| Lrp4      | Rattus norvegicus low density lipoprotein receptor-related protein 4 (Lrp4), mRNA [NM_031322]                                                       | <b>12,618</b> |
| Zwint     | Rattus norvegicus ZW10 interactor (Zwint), mRNA [NM_147138]                                                                                         | <b>12,615</b> |
| Olr1411   | Rattus norvegicus olfactory receptor 1411 (Olr1411), mRNA [NM_001000783]                                                                            | <b>12,615</b> |
| LOC501391 | Rattus norvegicus cDNA clone IMAGE:7456737. [BC158634]                                                                                              | <b>12,610</b> |
| Bves      | Rattus norvegicus blood vessel epicardial substance (Bves), mRNA [NM_001077590]                                                                     | <b>12,610</b> |
| Trim26    | Rattus norvegicus tripartite motif-containing 26 (Trim26), mRNA [NM_001011665]                                                                      | <b>12,608</b> |
| Ifi35     | Rattus norvegicus interferon-induced protein 35 (Ifi35), mRNA [NM_001009625]                                                                        | <b>12,606</b> |
| Vars2     | Rattus norvegicus valyl-tRNA synthetase 2, mitochondrial (putative) (Vars2), nuclear gene encoding mitochondrial protein, mRNA [NM_213563]          | <b>12,606</b> |
| Add2      | Rattus norvegicus adducin 2 (beta) (Add2), transcript variant 2, mRNA [NM_012491]                                                                   | <b>12,605</b> |
| LOC679651 | Rattus norvegicus hypothetical protein LOC679651 (LOC679651), mRNA [NM_001195277]                                                                   | <b>12,604</b> |
| Fam185a   | Rattus norvegicus family with sequence similarity 185, member A (Fam185a), mRNA [NM_001128188]                                                      | <b>12,603</b> |

|           |                                                                                                                                                     |               |
|-----------|-----------------------------------------------------------------------------------------------------------------------------------------------------|---------------|
| 0         | Rattus norvegicus similar to Pyruvate kinase, M2 isozyme (LOC315231), mRNA [XM_235589]                                                              | <b>12,602</b> |
| 0         | Rattus norvegicus chromosome 1 strain BN/SsNHsdMCW RNOR03207803, whole genome shotgun sequence [AABR03002941]                                       | <b>12,601</b> |
| Lrp8      | Uncharacterized protein [Source:UniProtKB/TrEMBL;Acc:D3ZE47] [ENSRNOT00000017575]                                                                   | <b>12,601</b> |
| Ndst2     | Rattus norvegicus N-deacetylase/N-sulfotransferase (heparan glucosaminy) 2 (Ndst2), mRNA [NM_001105740]                                             | <b>12,598</b> |
| Arrdc4    | Rattus norvegicus arrestin domain containing 4 (Arrdc4), mRNA [NM_001047853]                                                                        | <b>12,598</b> |
| Akirin1   | Rattus norvegicus akirin 1 (Akirin1), mRNA [NM_001030054]                                                                                           | <b>12,597</b> |
| Prm3      | Rattus norvegicus protamine 3 (Prm3), mRNA [NM_001002855]                                                                                           | <b>12,593</b> |
| 0         | Unknown                                                                                                                                             | <b>12,590</b> |
| Syt7      | Rattus norvegicus synaptotagmin VII (Syt7), mRNA [NM_021659]                                                                                        | <b>12,587</b> |
| Tcfe2a    | Rattus norvegicus transcription factor E2a (Tcfe2a), transcript variant 1, mRNA [NM_133524]                                                         | <b>12,584</b> |
| Dlg1      | Rattus norvegicus discs, large homolog 1 (Drosophila) (Dlg1), mRNA [NM_012788]                                                                      | <b>12,581</b> |
| LOC683746 | PREDICTED: Rattus norvegicus similar to thyroid autoantigen (LOC683746), mRNA [XM_001067309]                                                        | <b>12,580</b> |
| LOC501251 | PREDICTED: Rattus norvegicus similar to Discs large homolog 5 (Placenta and prostate DLG) (Discs large protein P-dlg) (LOC501251), mRNA [XM_576670] | <b>12,580</b> |
| Jakmip3   | Rattus norvegicus janus kinase and microtubule interacting protein 3 (Jakmip3), mRNA [NM_001163277]                                                 | <b>12,580</b> |
| 0         | Unknown                                                                                                                                             | <b>12,579</b> |
| Cd3d      | Rattus norvegicus CD3 molecule, delta (Cd3d), mRNA [NM_013169]                                                                                      | <b>12,577</b> |
| 0         | Unknown                                                                                                                                             | <b>12,577</b> |
| Dhx37     | probable ATP-dependent RNA helicase DHX37 [Source:RefSeq peptide;Acc:NP_001099396] [ENSRNOT00000030823]                                             | <b>12,570</b> |
| Set       | Rattus norvegicus SET nuclear oncogene (Set), mRNA [NM_001012504]                                                                                   | <b>12,569</b> |
| LOC685437 | PREDICTED: Rattus norvegicus hypothetical protein LOC685437 (LOC685437), mRNA [XM_001063788]                                                        | <b>12,565</b> |
| Nebi      | Uncharacterized protein [Source:UniProtKB/TrEMBL;Acc:D4A164] [ENSRNOT00000037601]                                                                   | <b>12,565</b> |
| C2        | Rattus norvegicus complement component 2 (C2), mRNA [NM_172222]                                                                                     | <b>12,564</b> |
| Pspn      | Rattus norvegicus persephin (Pspn), mRNA [NM_013014]                                                                                                | <b>12,562</b> |
| Vwa1      | Rattus norvegicus von Willebrand factor A domain containing 1 (Vwa1), mRNA [NM_001013938]                                                           | <b>12,562</b> |
| 0         | Ras-related protein Rab-28 [Source:UniProtKB/Swiss-Prot;Acc:P51158] [ENSRNOT00000041310]                                                            | <b>12,554</b> |
| Nfatc3    | Rattus norvegicus nuclear factor of activated T-cells, cytoplasmic, calcineurin-dependent 3 (Nfatc3), mRNA [NM_001108447]                           | <b>12,553</b> |
| Clock     | Rattus norvegicus clock homolog (mouse) (Clock), mRNA [NM_021856]                                                                                   | <b>12,551</b> |
| Atg9a     | Rattus norvegicus ATG9 autophagy related 9 homolog A (S. cerevisiae) (Atg9a), mRNA [NM_001014218]                                                   | <b>12,550</b> |
| Rasgrp4   | Rattus norvegicus RAS guanyl releasing protein 4 (Rasgrp4), mRNA [NM_130824]                                                                        | <b>12,549</b> |
| Pak1ip1   | Rattus norvegicus PAK1 interacting protein 1 (Pak1ip1), mRNA [NM_001037356]                                                                         | <b>12,548</b> |
| Eps8l2    | Rattus norvegicus EPS8-like 2 (Eps8l2), mRNA [NM_001108508]                                                                                         | <b>12,547</b> |
| Mea1      | Rattus norvegicus male-enhanced antigen 1 (Mea1), mRNA [NM_001044286]                                                                               | <b>12,547</b> |
| 0         | Unknown                                                                                                                                             | <b>12,547</b> |



|            |                                                                                                                    |        |
|------------|--------------------------------------------------------------------------------------------------------------------|--------|
| Akna       | Rattus norvegicus AT-hook transcription factor (Akna), mRNA [NM_001108668]                                         | 12,546 |
| Pdp2       | Rattus norvegicus pyruvate dehydrogenase phosphatase catalytic subunit 2 (Pdp2), mRNA [NM_145091]                  | 12,545 |
| 0          | Unknown                                                                                                            | 12,541 |
| Vom2r35    | Rattus norvegicus vomeronasal 2 receptor, 35 (Vom2r35), mRNA [NM_001099473]                                        | 12,541 |
| 0          | Q29A56_DROPS (Q29A56) GA18264-PA (Fragment), partial (3%) [TC648872]                                               | 12,540 |
| RGD1562136 | Rattus norvegicus similar to D1Ert622e protein (RGD1562136), mRNA [NM_001109086]                                   | 12,539 |
| Col15a1    | Col15a1 protein [Source:UniProtKB/TrEMBL;Acc:Q4G024] [ENSRNOT00000017217]                                          | 12,539 |
| Mex3d      | PREDICTED: Rattus norvegicus ring finger (C3HC4 type) and KH domain containing 1 (Rkhd1), mRNA [XM_234921]         | 12,539 |
| 0          | RIKEN cDNA D430041D05 gene Gene [Source:MGI Symbol;Acc:MGI:2181743] [ENSRNOT00000015073]                           | 12,534 |
| Cd6        | Rattus norvegicus Cd6 molecule (Cd6), mRNA [NM_175577]                                                             | 12,532 |
| Cnm4       | Metal transporter CNM4 [Source:UniProtKB/Swiss-Prot;Acc:P0C588] [ENSRNOT00000021434]                               | 12,529 |
| Sord       | Rattus norvegicus sorbitol dehydrogenase (Sord), mRNA [NM_017052]                                                  | 12,528 |
| G2e3       | Rattus norvegicus G2/M-phase specific E3 ubiquitin ligase (G2e3), mRNA [NM_001106726]                              | 12,528 |
| Phf1       | Rattus norvegicus PHD finger protein 1 (Phf1), mRNA [NM_212538]                                                    | 12,526 |
| LOC246295  | Rattus norvegicus glycine-, glutamate-, thienylcyclohexylpiperidine-binding protein (LOC246295), mRNA [NM_145082]  | 12,526 |
| Fibp       | Rattus norvegicus fibroblast growth factor (acidic) intracellular binding protein (Fibp), mRNA [NM_172334]         | 12,520 |
| Tbc1d13    | Uncharacterized protein [Source:UniProtKB/TrEMBL;Acc:D4AEG7] [ENSRNOT00000021431]                                  | 12,517 |
| 0          | Rattus norvegicus similar to glyceraldehyde-3-phosphate dehydrogenase (LOC305750), mRNA [XM_223850]                | 12,517 |
| 0          | Rattus norvegicus similar to glyceraldehyde-3-phosphate dehydrogenase (LOC291543), mRNA [XM_225871]                | 12,515 |
| Nlgn2      | Rattus norvegicus neuroligin 2 (Nlgn2), mRNA [NM_053992]                                                           | 12,515 |
| Adrm1      | Rattus norvegicus adhesion regulating molecule 1 (Adrm1), mRNA [NM_031708]                                         | 12,514 |
| 0          | Unknown                                                                                                            | 12,512 |
| Slc35e2    | Rattus norvegicus solute carrier family 35, member E2 (Slc35e2), mRNA [NM_001107998]                               | 12,510 |
| Eif3h      | Eukaryotic translation initiation factor 3 subunit H [Source:UniProtKB/Swiss-Prot;Acc:Q6P9U8] [ENSRNOT00000005786] | 12,508 |
| 0          | Unknown                                                                                                            | 12,506 |
| Fbxw11     | Rattus norvegicus F-box and WD repeat domain containing 11 (Fbxw11), mRNA [NM_001106993]                           | 12,506 |
| RGD1560846 | Rattus norvegicus similar to hypothetical protein MGC40178 (RGD1560846), mRNA [NM_001134603]                       | 12,505 |
| Nfyb       | Rattus norvegicus nuclear transcription factor-Y beta (Nfyb), mRNA [NM_031553]                                     | 12,504 |
| Dstn       | Rattus norvegicus destrin (Dstn), mRNA [NM_001033666]                                                              | 12,504 |
| Pdpr       | Rattus norvegicus pyruvate dehydrogenase phosphatase regulatory subunit (Pdpr), mRNA [NM_001107430]                | 12,504 |
| Otof       | Otoferlin [Source:UniProtKB/Swiss-Prot;Acc:Q9ERC5] [ENSRNOT00000013712]                                            | 12,503 |
| RGD1311358 | Rattus norvegicus similar to RIKEN cDNA 2410017P07 (RGD1311358), mRNA [NM_001017448]                               | 12,501 |
| LOC686139  | PREDICTED: Rattus norvegicus similar to abhydrolase domain containing 11 (LOC686139), mRNA [XM_001066660]          | 12,499 |
| Vom2r8     | Rattus norvegicus vomeronasal 2 receptor, 8 (Vom2r8), mRNA [NM_001099464]                                          | 12,498 |

|            |                                                                                                                                                                         |        |
|------------|-------------------------------------------------------------------------------------------------------------------------------------------------------------------------|--------|
| Eno1       | Rattus norvegicus enolase 1, (alpha), mRNA (cDNA clone MGC:93770 IMAGE:7108936), complete cds. [BC090069]                                                               | 12,496 |
| Lrrtm2     | Rattus norvegicus leucine rich repeat transmembrane neuronal 2 (Lrrtm2), mRNA [NM_001109469]                                                                            | 12,495 |
| Atp6v1f    | Rattus norvegicus ATPase, H transporting, lysosomal V1 subunit F (Atp6v1f), mRNA [NM_053884]                                                                            | 12,494 |
| Kctd17     | Rattus norvegicus potassium channel tetramerisation domain containing 17 (Kctd17), mRNA [NM_001134529]                                                                  | 12,491 |
| Elmo2      | Rattus norvegicus engulfment and cell motility 2 (Elmo2), mRNA [NM_001134955]                                                                                           | 12,491 |
| Arf5       | Rattus norvegicus ADP-ribosylation factor 5 (Arf5), mRNA [NM_024149]                                                                                                    | 12,482 |
| RGD1563263 | Rattus norvegicus similar to RIKEN cDNA 1700029I15 (RGD1563263), mRNA [NM_001109201]                                                                                    | 12,482 |
| 0          | RNGZAL4 guanine nucleotide-binding protein {Rattus norvegicus} (exp=-1; wgp=0; cg=0), complete [TC578187]                                                               | 12,478 |
| RGD1562551 | Rattus norvegicus similar to C20orf82 (RGD1562551), mRNA [NM_001134552]                                                                                                 | 12,478 |
| 0          | Unknown                                                                                                                                                                 | 12,477 |
| 0          | Unknown                                                                                                                                                                 | 12,476 |
| RGD1561238 | PREDICTED: Rattus norvegicus similar to ring finger protein 122 homolog (RGD1561238), mRNA [XM_001069254]                                                               | 12,475 |
| RGD1566359 | Uncharacterized protein [Source:UniProtKB/TrEMBL;Acc:D4ADM9] [ENSRNOT00000029899]                                                                                       | 12,470 |
| Mesp1      | Rattus norvegicus mesoderm posterior 1 homolog (mouse) (Mesp1), mRNA [NM_001107531]                                                                                     | 12,470 |
| 0          | RVL6632 Wackym-Soares normalized rat vestibular cDNA library Rattus norvegicus cDNA 5', mRNA sequence [DV716430]                                                        | 12,470 |
| Agk        | Rattus norvegicus acylglycerol kinase (Agk), nuclear gene encoding mitochondrial protein, mRNA [NM_001127497]                                                           | 12,469 |
| 0          | Stathmin [Source:UniProtKB/Swiss-Prot;Acc:P13668] [ENSRNOT00000022574]                                                                                                  | 12,468 |
| Elovl5     | Rattus norvegicus ELOVL family member 5, elongation of long chain fatty acids (yeast) (Elovl5), mRNA [NM_134382]                                                        | 12,468 |
| 0          | Rattus norvegicus similar to Glyceraldehyde 3-phosphate dehydrogenase (GAPDH) (38 kDa BFA-dependent ADP-ribosylation substrate) (BARS-38) (LOC364400), mRNA [XM_344418] | 12,467 |
| RGD1565819 | Rattus norvegicus similar to C20orf174 (RGD1565819), mRNA [NM_001171096]                                                                                                | 12,464 |
| LOC500034  | Rattus norvegicus similar to CG3570-PA (LOC500034), mRNA [NM_001109221]                                                                                                 | 12,464 |
| Man1b1     | Endoplasmic reticulum mannosyl-oligosaccharide 1,2-alpha-mannosidase [Source:UniProtKB/Swiss-Prot;Acc:B2GUY0] [ENSRNOT00000016846]                                      | 12,464 |
| 0          | Unknown                                                                                                                                                                 | 12,461 |
| Stag2      | Rattus norvegicus stromal antigen 2 (Stag2), mRNA [NM_001173507]                                                                                                        | 12,461 |
| Bbs4       | Rattus norvegicus Bardet-Biedl syndrome 4 (Bbs4), mRNA [NM_001106826]                                                                                                   | 12,459 |
| Ptp4a1     | Rattus norvegicus protein tyrosine phosphatase type IVA, member 1 (Ptp4a1), mRNA [NM_031579]                                                                            | 12,457 |
| 0          | Unknown                                                                                                                                                                 | 12,456 |
| Abca8a     | PREDICTED: Rattus norvegicus ATP-binding cassette, sub-family A (ABC1), member 8a (Abca8a), mRNA [XM_221100]                                                            | 12,452 |
| Tet2       | Uncharacterized protein [Source:UniProtKB/TrEMBL;Acc:D4AC33] [ENSRNOT00000046775]                                                                                       | 12,452 |
| Stt3b      | Rattus norvegicus STT3, subunit of the oligosaccharyltransferase complex, homolog B (S. cerevisiae) (Stt3b), mRNA [NM_001170539]                                        | 12,452 |
| Gyg1       | Rattus norvegicus glycogenin 1 (Gyg1), mRNA [NM_031043]                                                                                                                 | 12,450 |
| Olr7       | Rattus norvegicus olfactory receptor 7 (Olr7), mRNA [NM_001000768]                                                                                                      | 12,448 |
| 0          | Rattus norvegicus TL0AEA6YG01 mRNA sequence. [FQ231471]                                                                                                                 | 12,448 |

|            |                                                                                                                                                 |        |
|------------|-------------------------------------------------------------------------------------------------------------------------------------------------|--------|
| Rab23      | Rattus norvegicus RAB23, member RAS oncogene family (Rab23), mRNA [NM_001109005]                                                                | 12,448 |
| Rpl28      | Rattus norvegicus ribosomal protein L28 (Rpl28), mRNA [NM_022697]                                                                               | 12,447 |
| Sprr1b     | PREDICTED: Rattus norvegicus small proline-rich protein 1B (cornifin) (Sprr1b), mRNA [XM_001065728]                                             | 12,445 |
| Cacna2d2   | Rattus norvegicus calcium channel, voltage-dependent, alpha 2/delta subunit 2 (Cacna2d2), mRNA [NM_175592]                                      | 12,444 |
| 0          | Unknown                                                                                                                                         | 12,439 |
| Usp48      | Rattus norvegicus ubiquitin specific peptidase 48 (Usp48), mRNA [NM_198785]                                                                     | 12,439 |
| Znf672     | Rattus norvegicus zinc finger protein 672 (Znf672), mRNA [NM_001007669]                                                                         | 12,439 |
| Pcsk7      | Rattus norvegicus proprotein convertase subtilisin/kexin type 7 (Pcsk7), mRNA [NM_019246]                                                       | 12,437 |
| Bad        | Rattus norvegicus BCL2-associated agonist of cell death (Bad), mRNA [NM_022698]                                                                 | 12,436 |
| RGD1563235 | Rattus norvegicus similar to 1700054N08Rik protein (RGD1563235), mRNA [NM_001107441]                                                            | 12,436 |
| Pap0lg     | Rattus norvegicus poly(A) polymerase gamma (Pap0lg), mRNA [NM_001107244]                                                                        | 12,436 |
| Aif1       | Rattus norvegicus allograft inflammatory factor 1 (Aif1), mRNA [NM_017196]                                                                      | 12,436 |
| Sh3gl1     | Rattus norvegicus SH3-domain GRB2-like 1 (Sh3gl1), mRNA [NM_031239]                                                                             | 12,434 |
| Olr1091    | Rattus norvegicus olfactory receptor 1091 (Olr1091), mRNA [NM_001000593]                                                                        | 12,433 |
| 0          | Unknown                                                                                                                                         | 12,432 |
| Lrrtm3     | Rattus norvegicus leucine rich repeat transmembrane neuronal 3 (Lrrtm3), mRNA [NM_001106387]                                                    | 12,431 |
| Pear1      | Rattus norvegicus platelet endothelial aggregation receptor 1 (Pear1), mRNA [NM_001134959]                                                      | 12,430 |
| Efcab4b    | PREDICTED: Rattus norvegicus EF-hand calcium binding domain 4B (Efcab4b), mRNA [XM_575675]                                                      | 12,428 |
| Tmem132d   | Rattus norvegicus transmembrane protein 132D (Tmem132d), mRNA [NM_198727]                                                                       | 12,427 |
| 0          | Rattus norvegicus TL0AAA52YK09 mRNA sequence. [FQ212560]                                                                                        | 12,424 |
| 0          | AGENCOURT_118846637 NIH_MGC_248 Rattus norvegicus cDNA clone IMAGE:9112865 5', mRNA sequence [EX493553]                                         | 12,422 |
| 0          | Rattus norvegicus TL0ADA16YE04 mRNA sequence. [FQ223021]                                                                                        | 12,421 |
| Maf        | Rattus norvegicus v-maf musculoaponeurotic fibrosarcoma oncogene homolog (avian) (Maf), mRNA [NM_019318]                                        | 12,421 |
| 0          | Unknown                                                                                                                                         | 12,420 |
| Exph5      | PREDICTED: Rattus norvegicus exophilin 5, transcript variant 2 (Exph5), mRNA [XM_002727059]                                                     | 12,418 |
| Crim1      | Rattus norvegicus cysteine rich transmembrane BMP regulator 1 (chordin like) (Crim1), mRNA [NM_001169103]                                       | 12,414 |
| Agpat5     | Rattus norvegicus 1-acylglycerol-3-phosphate O-acyltransferase 5 (lysophosphatidic acid acyltransferase, epsilon) (Agpat5), mRNA [NM_001134744] | 12,414 |
| Ptar1      | Rattus norvegicus protein prenyltransferase alpha subunit repeat containing 1 (Ptar1), mRNA [NM_001105760]                                      | 12,412 |
| Faah       | Rattus norvegicus fatty acid amide hydrolase (Faah), mRNA [NM_024132]                                                                           | 12,411 |
| 0          | Unknown                                                                                                                                         | 12,410 |
| Dot1l      | Rattus norvegicus DOT1-like, histone H3 methyltransferase (S. cerevisiae) (Dot1l), mRNA [NM_001108733]                                          | 12,409 |
| Ddhd1      | Rattus norvegicus DDHD domain containing 1 (Ddhd1), mRNA [NM_001033066]                                                                         | 12,408 |
| 0          | Uncharacterized protein [Source:UniProtKB/TrEMBL;Acc:D3ZRC6] [ENSRNOT00000050943]                                                               | 12,408 |

|            |                                                                                                                                  |        |
|------------|----------------------------------------------------------------------------------------------------------------------------------|--------|
| Bpgm       | Rattus norvegicus 2,3-bisphosphoglycerate mutase (Bpgm), mRNA [NM_199382]                                                        | 12,407 |
| Ythdf2     | Rattus norvegicus YTH domain family, member 2 (Ythdf2), mRNA [NM_001047099]                                                      | 12,407 |
| Clec4b2    | Rattus norvegicus C-type lectin domain family 4, member b2 (Clec4b2), mRNA [NM_001005896]                                        | 12,406 |
| Slc4a2     | Rattus norvegicus solute carrier family 4 (anion exchanger), member 2 (Slc4a2), mRNA [NM_017048]                                 | 12,406 |
| Igsf1      | Rattus norvegicus immunoglobulin superfamily, member 1 (Igsf1), mRNA [NM_175763]                                                 | 12,405 |
| RGD1563296 | PREDICTED: Rattus norvegicus similar to component of oligomeric golgi complex 5 isoform 1 (RGD1563296), mRNA [XM_001076141]      | 12,405 |
| Dguok      | Rattus norvegicus deoxyguanosine kinase (Dguok), nuclear gene encoding mitochondrial protein, mRNA [NM_001106602]                | 12,402 |
| Slc30a6    | Rattus norvegicus solute carrier family 30 (zinc transporter), member 6 (Slc30a6), mRNA [NM_001106708]                           | 12,400 |
| Large      | Rattus norvegicus like-glycosyltransferase (Large), mRNA [NM_001108439]                                                          | 12,400 |
| 0          | Unknown                                                                                                                          | 12,399 |
| Tmem150c   | Rattus norvegicus transmembrane protein 150C (Tmem150c), mRNA [NM_001108354]                                                     | 12,398 |
| Evpl       | Rattus norvegicus envoplakin (Evpl), mRNA [NM_001107066]                                                                         | 12,397 |
| Bahd1      | Similar to mKIAA0945 protein (Predicted)Uncharacterized protein [Source:UniProtKB/TrEMBL;Acc:D3ZHT3] [ENSRNOT00000013878]        | 12,396 |
| Dusp16     | Rattus norvegicus dual specificity phosphatase 16 (Dusp16), mRNA [NM_001106624]                                                  | 12,395 |
| Znrf2      | Rattus norvegicus zinc and ring finger 2 (Znrf2), mRNA [NM_001108628]                                                            | 12,394 |
| Alg10      | Rattus norvegicus asparagine-linked glycosylation 10, alpha-1,2-glucosyltransferase homolog (S. pombe) (Alg10), mRNA [NM_139101] | 12,393 |
| 0          | Uncharacterized protein [Source:UniProtKB/TrEMBL;Acc:D3ZWB3] [ENSRNOT00000018647]                                                | 12,391 |
| 0          | Unknown                                                                                                                          | 12,390 |
| Prkci      | Rattus norvegicus protein kinase C, iota (Prkci), mRNA [NM_032059]                                                               | 12,390 |
| 0          | Rattus norvegicus similar to small GTPase (LOC287708), mRNA [XM_213475]                                                          | 12,390 |
| Otud6b     | Rattus norvegicus OTU domain containing 6B (Otud6b), mRNA [NM_001106639]                                                         | 12,385 |
| Gpr45      | Rattus norvegicus G protein-coupled receptor 45 (Gpr45), mRNA [NM_001106906]                                                     | 12,384 |
| 0          | Q8R0G6_MOUSE (Q8R0G6) Ttc19 protein (Fragment), partial (56%) [TC585660]                                                         | 12,383 |
| Fert2      | Rattus norvegicus fer (fms/fps related) protein kinase, testis specific 2 (Fert2), mRNA [NM_001106928]                           | 12,383 |
| Lpxn       | Rattus norvegicus leupaxin (Lpxn), mRNA [NM_001009649]                                                                           | 12,383 |
| 0          | Unknown                                                                                                                          | 12,383 |
| Aasdhppt   | Rattus norvegicus amino adipate-semialdehyde dehydrogenase-phosphopantetheinyl transferase (Aasdhppt), mRNA [NM_001106798]       | 12,381 |
| Mboat2     | Rattus norvegicus membrane bound O-acyltransferase domain containing 2 (Mboat2), mRNA [NM_001108016]                             | 12,380 |
| Btg4       | Rattus norvegicus B-cell translocation gene 4 (Btg4), mRNA [NM_001013176]                                                        | 12,380 |
| RGD1306880 | RCG50366Uncharacterized protein [Source:UniProtKB/TrEMBL;Acc:D4A7C3] [ENSRNOT00000011586]                                        | 12,378 |
| 0          | Unknown                                                                                                                          | 12,378 |
| 0          | Unknown                                                                                                                          | 12,378 |
| Rreb1      | Rattus norvegicus ras responsive element binding protein 1 (Rreb1), mRNA [NM_001107348]                                          | 12,377 |
| Rfk        | Rattus norvegicus riboflavin kinase (Rfk), mRNA [NM_001014106]                                                                   | 12,376 |

|            |                                                                                                                                             |        |
|------------|---------------------------------------------------------------------------------------------------------------------------------------------|--------|
| Mtmr7      | Rattus norvegicus myotubularin related protein 7 (Mtmr7), mRNA [NM_001107312]                                                               | 12,373 |
| Vpreb3     | Rattus norvegicus pre-B lymphocyte 3 (Vpreb3), mRNA [NM_001108930]                                                                          | 12,364 |
| Vom2r34    | Rattus norvegicus vomeronasal 2 receptor, 34 (Vom2r34), mRNA [NM_001099657]                                                                 | 12,364 |
| Rfc5       | Rattus norvegicus replication factor C (activator 1) 5 (Rfc5), mRNA [NM_001107146]                                                          | 12,363 |
| Nucb1      | Rattus norvegicus nucleobindin 1 (Nucb1), mRNA [NM_053463]                                                                                  | 12,362 |
| 0          | Unknown                                                                                                                                     | 12,359 |
| Terf2ip    | Rattus norvegicus telomeric repeat binding factor 2, interacting protein (Terf2ip), mRNA [NM_001013143]                                     | 12,354 |
| Grid2ip    | Rattus norvegicus glutamate receptor, ionotropic, delta 2 (Grid2) interacting protein (Grid2ip), mRNA [NM_001105910]                        | 12,353 |
| LOC652955  | Rattus norvegicus goliath (LOC652955), mRNA [NM_001037658]                                                                                  | 12,352 |
| RGD1309188 | Rattus norvegicus similar to hypothetical protein BC011833 (RGD1309188), mRNA [NM_001108129]                                                | 12,347 |
| Slc7a13    | Rattus norvegicus solute carrier family 7, (cationic amino acid transporter, y+ system) member 13 (Slc7a13), mRNA [NM_001012100]            | 12,346 |
| Ttc14      | Rattus norvegicus tetratricopeptide repeat domain 14 (Ttc14), mRNA [NM_001107666]                                                           | 12,345 |
| 0          | Unknown                                                                                                                                     | 12,344 |
| Fastk      | Rattus norvegicus Fas-activated serine/threonine kinase (Fastk), mRNA [NM_001011967]                                                        | 12,344 |
| 0          | Unknown                                                                                                                                     | 12,343 |
| LOC684996  | Rattus norvegicus similar to chromosome 7 open reading frame 11 (LOC684996), mRNA [NM_001109452]                                            | 12,342 |
| Grin1      | Rattus norvegicus glutamate receptor, ionotropic, N-methyl D-aspartate 1 (Grin1), mRNA [NM_017010]                                          | 12,341 |
| Vps26a     | Rattus norvegicus vacuolar protein sorting 26 homolog A (S. pombe) (Vps26a), mRNA [NM_001007740]                                            | 12,338 |
| Prickle1   | Rattus norvegicus prickly homolog 1 (Drosophila) (Prickle1), mRNA [NM_199396]                                                               | 12,337 |
| LOC686921  | PREDICTED: Rattus norvegicus hypothetical protein LOC686921 (LOC686921), mRNA [XM_001076338]                                                | 12,334 |
| Sfxn2      | sideroflexin 2 [Source:RefSeq peptide;Acc:NP_001013090] [ENSRNOT00000027112]                                                                | 12,334 |
| Kcnh3      | Rattus norvegicus potassium voltage-gated channel, subfamily H (eag-related), member 3 (Kcnh3), mRNA [NM_017108]                            | 12,333 |
| 0          | Q5BK04_RAT (Q5BK04) LOC363306 protein (Fragment), partial (78%) [TC626013]                                                                  | 12,332 |
| 0          | Rattus norvegicus similar to glyceraldehyde-3-phosphate dehydrogenase (phosphorylating) (EC 1.2.1.12) - mouse (LOC289157), mRNA [XM_222813] | 12,330 |
| RGD1564167 | PREDICTED: Rattus norvegicus similar to basic transcription factor 3 (RGD1564167), mRNA [XM_002727687]                                      | 12,327 |
| Lrrc8d     | Rattus norvegicus leucine rich repeat containing 8 family, member D (Lrrc8d), mRNA [NM_001008338]                                           | 12,327 |
| RGD1564228 | PREDICTED: Rattus norvegicus similar to Naglu (RGD1564228), mRNA [XM_001081442]                                                             | 12,323 |
| Agpat3     | Rattus norvegicus 1-acylglycerol-3-phosphate O-acyltransferase 3 (Agpat3), mRNA [NM_001106378]                                              | 12,321 |
| RGD1564676 | Rattus norvegicus similar to NF-X1 type zinc finger containing protein (2J511) (LOC364700), mRNA [XM_344589]                                | 12,321 |
| 0          | AW527166 UI-R-BO1-ajm-c-07-0-UI.s1 UI-R-BO1 Rattus norvegicus cDNA clone UI-R-BO1-ajm-c-07-0-UI 3', mRNA sequence [AW527166]                | 12,316 |
| Golt1b     | Rattus norvegicus golgi transport 1 homolog B (S. cerevisiae) (Golt1b), mRNA [NM_001113783]                                                 | 12,315 |
| Dpy19l1    | Rattus norvegicus dpy-19-like 1 (C. elegans) (Dpy19l1), mRNA [NM_001191791]                                                                 | 12,313 |
| Flnb       | Rattus norvegicus filamin, beta (Flnb), mRNA [NM_001107288]                                                                                 | 12,311 |

|            |                                                                                                                                      |               |
|------------|--------------------------------------------------------------------------------------------------------------------------------------|---------------|
| Ttc33      | Rattus norvegicus tetratricopeptide repeat domain 33 (Ttc33), mRNA [NM_001106414]                                                    | <b>12,309</b> |
| Pfdn2      | Rattus norvegicus prefoldin subunit 2 (Pfdn2), mRNA [NM_001109476]                                                                   | <b>12,308</b> |
| 0          | Rattus norvegicus similar to glyceraldehyde-3-phosphate dehydrogenase (LOC302351), mRNA [XM_228478]                                  | <b>12,305</b> |
| LOC678708  | PREDICTED: Rattus norvegicus similar to histone 1, H2ai (LOC678708), mRNA [XM_002724915]                                             | <b>12,305</b> |
| RGD1306941 | Rattus norvegicus similar to CG31122-PA (RGD1306941), mRNA [NM_001108219]                                                            | <b>12,304</b> |
| Stk24      | Rattus norvegicus serine/threonine kinase 24 (STE20 homolog, yeast) (Stk24), mRNA [NM_001127494]                                     | <b>12,302</b> |
| 0          | Unknown                                                                                                                              | <b>12,300</b> |
| Nav2       | Rattus norvegicus neuron navigator 2 (Nav2), mRNA [NM_138529]                                                                        | <b>12,298</b> |
| Rab33b     | Rattus norvegicus RAB33B, member of RAS oncogene family (Rab33b), mRNA [NM_001108944]                                                | <b>12,297</b> |
| 0          | Unknown                                                                                                                              | <b>12,296</b> |
| Rnf32      | Rattus norvegicus ring finger protein 32 (Rnf32), mRNA [NM_001012095]                                                                | <b>12,296</b> |
| 0          | Q4IH13_GIBZE (Q4IH13) Predicted protein, partial (6%) [TC640504]                                                                     | <b>12,296</b> |
| 0          | Unknown                                                                                                                              | <b>12,295</b> |
| Ywhaz      | Rattus norvegicus tyrosine 3-monooxygenase/tryptophan 5-monooxygenase activation protein, zeta polypeptide (Ywhaz), mRNA [NM_013011] | <b>12,290</b> |
| 0          | PREDICTED: Rattus norvegicus similar to hypothetical protein 4932411N23 (RGD1561151), mRNA [XM_001066024]                            | <b>12,290</b> |
| RGD1359634 | Rattus norvegicus similar to RIKEN cDNA 1700088E04 (RGD1359634), mRNA [NM_001007708]                                                 | <b>12,289</b> |
| 0          | Unknown                                                                                                                              | <b>12,289</b> |
| 0          | Unknown                                                                                                                              | <b>12,289</b> |
| 0          | Unknown                                                                                                                              | <b>12,289</b> |
| 0          | Unknown                                                                                                                              | <b>12,287</b> |
| RGD1309374 | Uncharacterized protein [Source:UniProtKB/TrEMBL;Acc:D3ZU62] [ENSRNOT00000020492]                                                    | <b>12,285</b> |
| 0          | RIKEN cDNA 2510006D16 gene Gene [Source:MGI Symbol;Acc:MGI:1924049] [ENSRNOT00000000136]                                             | <b>12,284</b> |
| Scamp1     | Rattus norvegicus secretory carrier membrane protein 1 (Scamp1), mRNA [NM_001100636]                                                 | <b>12,283</b> |
| Htr7       | 5-hydroxytryptamine receptor 7 [Source:UniProtKB/Swiss-Prot;Acc:P32305] [ENSRNOT00000025493]                                         | <b>12,283</b> |
| Olr1606    | Rattus norvegicus olfactory receptor 1606 (Olr1606), mRNA [NM_001000502]                                                             | <b>12,269</b> |
| LOC317165  | Rattus norvegicus similar to Set alpha isoform (LOC317165), mRNA [NM_001047892]                                                      | <b>12,265</b> |
| Kat5       | Rattus norvegicus K(lysine) acetyltransferase 5 (Kat5), mRNA [NM_001005872]                                                          | <b>12,262</b> |
| 0          | RIKEN cDNA 9430031J16 gene Gene [Source:MGI Symbol;Acc:MGI:2443135] [ENSRNOT00000041337]                                             | <b>12,261</b> |
| 0          | Unknown                                                                                                                              | <b>12,258</b> |
| 0          | Ankyrin repeat and SOCS box protein 14 [Source:UniProtKB/Swiss-Prot;Acc:P0C927] [ENSRNOT00000017887]                                 | <b>12,257</b> |
| RGD1309759 | PREDICTED: Rattus norvegicus similar to cDNA sequence BC013529, transcript variant 2 (RGD1309759), mRNA [XM_001059157]               | <b>12,257</b> |
| Tshr       | Rattus norvegicus thyroid stimulating hormone receptor (Tshr), mRNA [NM_012888]                                                      | <b>12,257</b> |
| 0          | Uncharacterized protein [Source:UniProtKB/TrEMBL;Acc:D3ZHQ7] [ENSRNOT00000057958]                                                    | <b>12,256</b> |
| Csad       | Rattus norvegicus cysteine sulfinic acid decarboxylase (Csad), transcript variant 1, mRNA [NM_021750]                                | <b>12,251</b> |

|           |                                                                                                                                                                  |        |
|-----------|------------------------------------------------------------------------------------------------------------------------------------------------------------------|--------|
| LOC691849 | Rattus norvegicus hypothetical protein LOC691849 (LOC691849), mRNA [NM_001198796]                                                                                | 12,247 |
| Wfikkn1   | Rattus norvegicus WAP, follistatin/kazal, immunoglobulin, kunitz and netrin domain containing 1 (Wfikkn1), mRNA [NM_001129776]                                   | 12,241 |
| Pramef8   | Rattus norvegicus PRAME family member 8 (Pramef8), mRNA [NM_001135782]                                                                                           | 12,240 |
| Tceal1    | Rattus norvegicus transcription elongation factor A (SII)-like 1 (Tceal1), mRNA [NM_001009675]                                                                   | 12,239 |
| 0         | Uncharacterized protein [Source:UniProtKB/TrEMBL;Acc:D3ZKN0] [ENSRNOT00000045362]                                                                                | 12,237 |
| Rab11fip4 | Rattus norvegicus RAB11 family interacting protein 4 (class II) (Rab11fip4), mRNA [NM_001107023]                                                                 | 12,237 |
| Cbx3      | Rattus norvegicus chromobox homolog 3 (HP1 gamma homolog, Drosophila) (Cbx3), mRNA [NM_001008313]                                                                | 12,235 |
| Pclo      | Rattus norvegicus piccolo (presynaptic cytomatrix protein) (Pclo), transcript variant 1, mRNA [NM_020098]                                                        | 12,234 |
| E2f1      | Rattus norvegicus E2F transcription factor 1 (E2f1), mRNA [NM_001100778]                                                                                         | 12,233 |
| 0         | Uncharacterized protein [Source:UniProtKB/TrEMBL;Acc:D3ZDF4] [ENSRNOT00000024704]                                                                                | 12,233 |
| Rcbtb1    | Rattus norvegicus regulator of chromosome condensation (RCC1) and BTB (POZ) domain containing protein 1 (Rcbtb1), mRNA [NM_001108380]                            | 12,233 |
| Ophn1     | Rattus norvegicus oligophrenin 1 (Ophn1), mRNA [NM_001107848]                                                                                                    | 12,233 |
| LOC692032 | Uncharacterized protein [Source:UniProtKB/TrEMBL;Acc:D4A4N1] [ENSRNOT00000039400]                                                                                | 12,233 |
| LOC680119 | PREDICTED: Rattus norvegicus hypothetical protein LOC680119 (LOC680119), mRNA [XM_001055803]                                                                     | 12,230 |
| Csnk1e    | Rattus norvegicus casein kinase 1, epsilon (Csnk1e), mRNA [NM_031617]                                                                                            | 12,230 |
| App12     | Rattus norvegicus adaptor protein, phosphotyrosine interaction, PH domain and leucine zipper containing 2 (App12), mRNA [NM_001108741]                           | 12,228 |
| Fstl1     | Rattus norvegicus follistatin-like 1 (Fstl1), mRNA [NM_024369]                                                                                                   | 12,228 |
| Rala      | Rattus norvegicus v-ral simian leukemia viral oncogene homolog A (ras related) (Rala), mRNA [NM_031093]                                                          | 12,222 |
| LOC366449 | PREDICTED: Rattus norvegicus hypothetical LOC366449 (LOC366449), miscRNA [XR_006808]                                                                             | 12,221 |
| Drd2      | Rattus norvegicus dopamine receptor D2 (Drd2), mRNA [NM_012547]                                                                                                  | 12,221 |
| Bola3     | Rattus norvegicus bolaA homolog 3 (E. coli) (Bola3), mRNA [NM_001106601]                                                                                         | 12,220 |
| 0         | Unknown                                                                                                                                                          | 12,218 |
| Grm7      | Rattus norvegicus glutamate receptor, metabotropic 7 (Grm7), mRNA [NM_031040]                                                                                    | 12,217 |
| 0         | Unknown                                                                                                                                                          | 12,216 |
| Marcks    | PREDICTED: Rattus norvegicus myristoylated alanine rich protein kinase C substrate (Marcks), mRNA [XM_002728965]                                                 | 12,216 |
| Pold2     | Rattus norvegicus polymerase (DNA directed), delta 2, regulatory subunit (Pold2), mRNA [NM_001013050]                                                            | 12,214 |
| Gpr12     | Rattus norvegicus G protein-coupled receptor 12 (Gpr12), transcript variant 2, mRNA [NM_030831]                                                                  | 12,214 |
| LOC684529 | PREDICTED: Rattus norvegicus similar to cathepsin O (LOC684529), mRNA [XM_001070844]                                                                             | 12,213 |
| Plcd4     | Rattus norvegicus phospholipase C, delta 4 (Plcd4), mRNA [NM_080688]                                                                                             | 12,213 |
| Ndufaf4   | Rattus norvegicus NADH dehydrogenase (ubiquinone) 1 alpha subcomplex, assembly factor 4 (Ndufaf4), nuclear gene encoding mitochondrial protein, mRNA [NM_198783] | 12,213 |
| Cyp27b1   | Rattus norvegicus cytochrome P450, family 27, subfamily b, polypeptide 1 (Cyp27b1), nuclear gene encoding mitochondrial protein, mRNA [NM_053763]                | 12,212 |
| Tdpoz1    | PREDICTED: Rattus norvegicus TD and POZ domain containing 1 (Tdpoz1), mRNA [XM_345239]                                                                           | 12,211 |

|           |                                                                                                                            |        |
|-----------|----------------------------------------------------------------------------------------------------------------------------|--------|
| Krtap31-1 | Rattus norvegicus keratin associated protein 31-1 (Krtap31-1), mRNA [NM_001109409]                                         | 12,210 |
| Mgat5     | Rattus norvegicus mannosyl (alpha-1,6-)-glycoprotein beta-1,6-N-acetyl-glucosaminyltransferase (Mgat5), mRNA [NM_023095]   | 12,210 |
| 0         | Unknown                                                                                                                    | 12,207 |
| 0         | predicted gene 71 Gene [Source:MGI Symbol;Acc:MGI:2684917] [ENSRNOT00000033412]                                            | 12,207 |
| Vdac2     | Rattus norvegicus voltage-dependent anion channel 2 (Vdac2), nuclear gene encoding mitochondrial protein, mRNA [NM_031354] | 12,207 |
| Zfp426l2  | Rattus norvegicus zinc finger protein 426-like 2 (Zfp426l2), mRNA [NM_001134585]                                           | 12,207 |
| 0         | Unknown                                                                                                                    | 12,207 |
| 0         | Unknown                                                                                                                    | 12,204 |
| Vps13d    | Rattus norvegicus vacuolar protein sorting 13 homolog D (S. cerevisiae) (Vps13d), mRNA [NM_001108006]                      | 12,204 |
| 0         | Unknown                                                                                                                    | 12,203 |
| Cabp7     | Rattus norvegicus calcium binding protein 7 (Cabp7), mRNA [NM_001007730]                                                   | 12,202 |
| Btd       | Rattus norvegicus biotinidase (Btd), mRNA [NM_001012047]                                                                   | 12,199 |
| Dtx4      | Rattus norvegicus deltex homolog 4 (Drosophila) (Dtx4), mRNA [NM_001047855]                                                | 12,198 |
| 0         | Glyceraldehyde-3-phosphate dehydrogenase [Source:UniProtKB/TrEMBL;Acc:D3Z7Z7] [ENSRNOT00000038921]                         | 12,195 |
| Gabpa     | Rattus norvegicus GA binding protein transcription factor, alpha subunit (Gabpa), mRNA [NM_001108841]                      | 12,192 |
| 0         | Uncharacterized protein [Source:UniProtKB/TrEMBL;Acc:D3ZU53] [ENSRNOT00000001469]                                          | 12,191 |
| Adamts18  | Rattus norvegicus ADAM metalloproteinase with thrombospondin type 1 motif, 18 (Adamts18), mRNA [NM_001191944]              | 12,190 |
| Jub       | Rattus norvegicus jub, ajuba homolog (Xenopus laevis) (Jub), mRNA [NM_053503]                                              | 12,190 |
| Gemin5    | Rattus norvegicus gem (nuclear organelle) associated protein 5 (Gemin5), mRNA [NM_001172089]                               | 12,188 |
| Heatr5b   | Rattus norvegicus HEAT repeat containing 5B (Heatr5b), mRNA [NM_001191064]                                                 | 12,187 |
| 0         | Unknown                                                                                                                    | 12,186 |
| 0         | Unknown                                                                                                                    | 12,185 |
| 0         | Unknown                                                                                                                    | 12,185 |
| 0         | integrin alpha V Gene [Source:MGI Symbol;Acc:MGI:96608] [ENSRNOT00000006961]                                               | 12,185 |
| Msx2      | Rattus norvegicus msh homeobox 2 (Msx2), mRNA [NM_012982]                                                                  | 12,184 |
| Vom1r24   | Rattus norvegicus vomeronasal 1 receptor 24 (Vom1r24), mRNA [NM_001008936]                                                 | 12,181 |
| Srxn1     | Rattus norvegicus sulfiredoxin 1 homolog (S. cerevisiae) (Srxn1), mRNA [NM_001047858]                                      | 12,179 |
| Mad111    | Rattus norvegicus MAD1 mitotic arrest deficient-like 1 (yeast) (Mad111), mRNA [NM_001109387]                               | 12,175 |
| Olr1615   | Rattus norvegicus olfactory receptor 1615 (Olr1615), mRNA [NM_001001003]                                                   | 12,173 |
| Abr       | Rattus norvegicus active BCR-related gene (Abr), mRNA [NM_001105814]                                                       | 12,173 |
| 0         | Uncharacterized protein [Source:UniProtKB/TrEMBL;Acc:D4ACN9] [ENSRNOT00000018433]                                          | 12,172 |
| Vkorc1    | Rattus norvegicus vitamin K epoxide reductase complex, subunit 1 (Vkorc1), mRNA [NM_203335]                                | 12,171 |
| 39142     | Rattus norvegicus membrane-associated ring finger (C3HC4) 7 (March7), mRNA [NM_001012087]                                  | 12,170 |
| 0         | Unknown                                                                                                                    | 12,169 |



|              |                                                                                                                                                   |               |
|--------------|---------------------------------------------------------------------------------------------------------------------------------------------------|---------------|
| Stmn2        | Rattus norvegicus stathmin-like 2 (Stmn2), mRNA [NM_053440]                                                                                       | <b>12,164</b> |
| Sh3rf1       | Rattus norvegicus SH3 domain containing ring finger 1 (Sh3rf1), mRNA [NM_198764]                                                                  | <b>12,163</b> |
| Rpl18a       | Rattus norvegicus ribosomal protein L18A (Rpl18a), mRNA [NM_212510]                                                                               | <b>12,161</b> |
| Gpr61        | Rattus norvegicus G protein-coupled receptor 61 (Gpr61), mRNA [NM_001107715]                                                                      | <b>12,160</b> |
| Gpr22        | Rattus norvegicus G protein-coupled receptor 22 (Gpr22), mRNA [NM_001106722]                                                                      | <b>12,159</b> |
| RGD1561537   | PREDICTED: Rattus norvegicus similar to putative repair and recombination helicase RAD26L, transcript variant 1 (RGD1561537), mRNA [XM_001058999] | <b>12,157</b> |
| LOC100362820 | PREDICTED: Rattus norvegicus Protein FAM186A-like (LOC100362820), mRNA [XM_002729856]                                                             | <b>12,156</b> |
| Samd8        | Rattus norvegicus sterile alpha motif domain containing 8 (Samd8), mRNA [NM_001012040]                                                            | <b>12,154</b> |
| LOC683415    | PREDICTED: Rattus norvegicus similar to adrenal mitochondrial protease (LOC683415), mRNA [XM_001065830]                                           | <b>12,153</b> |
| Chsy1        | Rattus norvegicus chondroitin sulfate synthase 1 (Chsy1), mRNA [NM_001106268]                                                                     | <b>12,153</b> |
| Ciz1         | Rattus norvegicus CDKN1A interacting zinc finger protein 1 (Ciz1), mRNA [NM_001106568]                                                            | <b>12,153</b> |
| 0            | EST450602 Rat Gene Index, normalized rat, Rattus norvegicus cDNA Rattus norvegicus cDNA clone RGIFL60, mRNA sequence [BF286011]                   | <b>12,153</b> |
| Elf2         | Rattus norvegicus E74-like factor 2 (Elf2), transcript variant 2, mRNA [NM_001012181]                                                             | <b>12,152</b> |
| LOC678918    | PREDICTED: Rattus norvegicus similar to NADH dehydrogenase (ubiquinone) 1 beta subcomplex 3 (LOC678918), mRNA [XM_001053805]                      | <b>12,152</b> |
| Col12a1      | Collagen alpha-1(XII) chain [Source:UniProtKB/Swiss-Prot;Acc:P70560] [ENSRNOT00000051159]                                                         | <b>12,152</b> |
| Rgs19        | Rattus norvegicus regulator of G-protein signaling 19 (Rgs19), mRNA [NM_021661]                                                                   | <b>12,146</b> |
| Nqo2         | Rattus norvegicus NAD(P)H dehydrogenase, quinone 2 (Nqo2), mRNA [NM_001004214]                                                                    | <b>12,145</b> |
| 0            | Unknown                                                                                                                                           | <b>12,145</b> |
| 0            | Unknown                                                                                                                                           | <b>12,143</b> |
| RGD1309903   | Uncharacterized protein [Source:UniProtKB/TrEMBL;Acc:D3ZF86] [ENSRNOT00000015927]                                                                 | <b>12,142</b> |
| Insig1       | Rattus norvegicus insulin induced gene 1 (Insig1), mRNA [NM_022392]                                                                               | <b>12,141</b> |
| Lipe         | Rattus norvegicus lipase, hormone sensitive (Lipe), mRNA [NM_012859]                                                                              | <b>12,141</b> |
| Myh9         | Rattus norvegicus myosin, heavy chain 9, non-muscle (Myh9), mRNA [NM_013194]                                                                      | <b>12,137</b> |
| Folh1        | Rattus norvegicus folate hydrolase 1 (Folh1), mRNA [NM_057185]                                                                                    | <b>12,137</b> |
| Twistnb      | Rattus norvegicus TWIST neighbor (Twistnb), mRNA [NM_001108707]                                                                                   | <b>12,137</b> |
| 0            | Unknown                                                                                                                                           | <b>12,136</b> |
| RGD1307225   | Rattus norvegicus similar to MEGF6 (RGD1307225), mRNA [NM_001107663]                                                                              | <b>12,136</b> |
| 0            | Unknown                                                                                                                                           | <b>12,136</b> |
| Muc6         | Uncharacterized protein [Source:UniProtKB/TrEMBL;Acc:D4A0Z2] [ENSRNOT00000026749]                                                                 | <b>12,135</b> |
| Lrrc51       | Rattus norvegicus leucine rich repeat containing 51 (Lrrc51), mRNA [NM_001106284]                                                                 | <b>12,132</b> |
| 0            | Unknown                                                                                                                                           | <b>12,131</b> |
| Klf5         | Rattus norvegicus Kruppel-like factor 5 (Klf5), mRNA [NM_053394]                                                                                  | <b>12,130</b> |
| Mtfr1        | Rattus norvegicus TL0ACA31YL20 mRNA sequence. [FQ217237]                                                                                          | <b>12,130</b> |

|            |                                                                                                                                  |        |
|------------|----------------------------------------------------------------------------------------------------------------------------------|--------|
| Ctsd       | Rattus norvegicus cathepsin D (Ctsd), mRNA [NM_134334]                                                                           | 12,129 |
| 0          | Unknown                                                                                                                          | 12,125 |
| Uprt       | Uncharacterized protein [Source:UniProtKB/TrEMBL;Acc:D4ABC7] [ENSRNOT00000033494]                                                | 12,124 |
| Vom2r16    | Rattus norvegicus vomeronasal 2 receptor, 16 (Vom2r16), mRNA [NM_001099655]                                                      | 12,119 |
| Fam19a5    | Rattus norvegicus family with sequence similarity 19 (chemokine (C-C motif)-like), member A5 (Fam19a5), mRNA [NM_001191991]      | 12,119 |
| Cdc27      | Rattus norvegicus cell division cycle 27 homolog (S. cerevisiae) (Cdc27), mRNA [NM_001024793]                                    | 12,117 |
| Hist1h1d   | Rattus norvegicus histone cluster 1, H1d (Hist1h1d), mRNA [NM_133285]                                                            | 12,117 |
| Prkd3      | Rattus norvegicus protein kinase D3 (Prkd3), mRNA [NM_001024263]                                                                 | 12,116 |
| Sez6       | Rattus norvegicus seizure related 6 homolog (mouse) (Sez6), mRNA [NM_001105754]                                                  | 12,116 |
| Map2k4     | Rattus norvegicus mitogen activated protein kinase kinase 4 (Map2k4), mRNA [NM_001030023]                                        | 12,116 |
| Nfasc      | Rattus norvegicus neurofascin (Nfasc), transcript variant 4, mRNA [NM_001160315]                                                 | 12,115 |
| Ttc4       | tetratricopeptide repeat domain 4 [Source:RefSeq peptide;Acc:NP_001013232] [ENSRNOT00000010229]                                  | 12,114 |
| Olr859     | Rattus norvegicus olfactory receptor 859 (Olr859), mRNA [NM_001000585]                                                           | 12,114 |
| 0          | Uncharacterized protein [Source:UniProtKB/TrEMBL;Acc:D3ZH07] [ENSRNOT00000049215]                                                | 12,114 |
| Rbpj       | Rattus norvegicus recombination signal binding protein for immunoglobulin kappa J region (Rbpj), mRNA [NM_001106631]             | 12,110 |
| Olr1415    | Rattus norvegicus olfactory receptor 1415 (Olr1415), mRNA [NM_001000781]                                                         | 12,108 |
| Edem3      | Rattus norvegicus ER degradation enhancer, mannosidase alpha-like 3 (Edem3), mRNA [NM_001191671]                                 | 12,108 |
| Smurf2     | Rattus norvegicus SMAD specific E3 ubiquitin protein ligase 2 (Smurf2), mRNA [NM_001107061]                                      | 12,107 |
| Adipor2    | Rattus norvegicus adiponectin receptor 2 (Adipor2), mRNA [NM_001037979]                                                          | 12,105 |
| Eif2a      | Rattus norvegicus eukaryotic translation initiation factor 2A (Eif2a), mRNA [NM_001109339]                                       | 12,104 |
| LOC679534  | PREDICTED: Rattus norvegicus hypothetical protein LOC679534 (LOC679534), mRNA [XM_002726891]                                     | 12,101 |
| LOC500532  | PREDICTED: Rattus norvegicus hypothetical LOC500532 (LOC500532), miscRNA [XR_008784]                                             | 12,100 |
| Gpr19      | Rattus norvegicus G protein-coupled receptor 19 (Gpr19), mRNA [NM_080579]                                                        | 12,098 |
| Lrrc7      | Rattus norvegicus leucine rich repeat containing 7 (Lrrc7), mRNA [NM_057142]                                                     | 12,098 |
| Rpusd3     | Rattus norvegicus RNA pseudouridylate synthase domain containing 3 (Rpusd3), mRNA [NM_001108641]                                 | 12,096 |
| Aurkaip1   | Rattus norvegicus aurora kinase A interacting protein 1 (Aurkaip1), mRNA [NM_001004237]                                          | 12,096 |
| Gfm2       | Ribosome-releasing factor 2, mitochondrial [Source:UniProtKB/Swiss-Prot;Acc:Q5BJP6] [ENSRNOT00000052072]                         | 12,095 |
| 0          | Unknown                                                                                                                          | 12,095 |
| RGD1564788 | PREDICTED: Rattus norvegicus similar to Werner syndrome helicase homolog, transcript variant 1 (RGD1564788), mRNA [XM_001059940] | 12,092 |
| 0          | BC075646 Luzp2 protein {Mus musculus} (exp=-1; wgp=0; cg=0), partial (83%) [TC635744]                                            | 12,090 |
| Prr22      | Rattus norvegicus proline rich 22 (Prr22), mRNA [NM_001126375]                                                                   | 12,089 |
| Rps6kb2    | Rattus norvegicus ribosomal protein S6 kinase, polypeptide 2 (Rps6kb2), mRNA [NM_001010962]                                      | 12,088 |
| Olr757     | Rattus norvegicus olfactory receptor 757 (Olr757), mRNA [NM_001000613]                                                           | 12,086 |
| Rya3       | Rattus norvegicus antimicrobial peptide RYA3 (Rya3), mRNA [NM_001109208]                                                         | 12,084 |

|              |                                                                                                                                                        |        |
|--------------|--------------------------------------------------------------------------------------------------------------------------------------------------------|--------|
| Adnp2        | Rattus norvegicus ADNP homeobox 2 (Adnp2), mRNA [NM_001127373]                                                                                         | 12,081 |
| 0            | Unknown                                                                                                                                                | 12,080 |
| LOC365985    | Rattus norvegicus similar to adenylate kinase 5 isoform 1 (LOC365985), mRNA [NM_001108951]                                                             | 12,077 |
| Tctn3        | PREDICTED: Rattus norvegicus tectonic family member 3 (Tctn3), mRNA [XM_001053561]                                                                     | 12,076 |
| Ibtk         | Uncharacterized protein [Source:UniProtKB/TrEMBL;Acc:D3ZAK7] [ENSRNOT00000056930]                                                                      | 12,075 |
| Smarca2      | Rattus norvegicus SWI/SNF related, matrix associated, actin dependent regulator of chromatin, subfamily a, member 2 (Smarca2), mRNA [NM_001004446]     | 12,072 |
| Smndc1       | Rattus norvegicus survival motor neuron domain containing 1 (Smndc1), transcript variant 2, mRNA [NM_001025400]                                        | 12,072 |
| Cabc1        | Rattus norvegicus chaperone, ABC1 activity of bc1 complex homolog (S. pombe) (Cabc1), nuclear gene encoding mitochondrial protein, mRNA [NM_001013185] | 12,071 |
| Cdh7         | Rattus norvegicus cadherin 7, type 2 (Cdh7), mRNA [NM_001012737]                                                                                       | 12,071 |
| Pgm3         | Rattus norvegicus phosphoglucomutase 3 (Pgm3), mRNA [NM_001108772]                                                                                     | 12,069 |
| Ret          | Rattus norvegicus ret proto-oncogene (Ret), transcript variant 1, mRNA [NM_012643]                                                                     | 12,069 |
| Fbxw5        | Rattus norvegicus F-box and WD repeat domain containing 5 (Fbxw5), mRNA [NM_001025730]                                                                 | 12,069 |
| 0            | Uncharacterized protein [Source:UniProtKB/TrEMBL;Acc:D3ZUL0] [ENSRNOT00000013651]                                                                      | 12,067 |
| Ugt8         | Rattus norvegicus UDP glycosyltransferase 8 (Ugt8), mRNA [NM_019276]                                                                                   | 12,066 |
| Sprn         | Rattus norvegicus shadow of prion protein homolog (zebrafish) (Sprn), mRNA [NM_001031845]                                                              | 12,064 |
| 0            | Unknown                                                                                                                                                | 12,059 |
| Rbm24        | Rattus norvegicus RNA binding motif protein 24 (Rbm24), mRNA [NM_001191100]                                                                            | 12,057 |
| Baat         | Rattus norvegicus bile acid Coenzyme A: amino acid N-acyltransferase (glycine N-choloyltransferase) (Baat), mRNA [NM_017300]                           | 12,057 |
| Pigu         | Rattus norvegicus phosphatidylinositol glycan anchor biosynthesis, class U (Pigu), mRNA [NM_181637]                                                    | 12,056 |
| 0            | Unknown                                                                                                                                                | 12,055 |
| 0            | Unknown                                                                                                                                                | 12,054 |
| Pum1         | Rattus norvegicus pumilio homolog 1 (Drosophila) (Pum1), mRNA [NM_001108684]                                                                           | 12,049 |
| Sc5dl        | Rattus norvegicus sterol-C5-desaturase (ERG3 delta-5-desaturase homolog, S. cerevisiae)-like (Sc5dl), mRNA [NM_053642]                                 | 12,048 |
| Umod         | Rattus norvegicus uromodulin (Umod), mRNA [NM_017082]                                                                                                  | 12,048 |
| Myt1         | Rattus norvegicus myelin transcription factor 1 (Myt1), mRNA [NM_001108615]                                                                            | 12,043 |
| Ggt7         | Rattus norvegicus gamma-glutamyltransferase 7 (Ggt7), mRNA [NM_130423]                                                                                 | 12,043 |
| Tuba3a       | Rattus norvegicus tubulin, alpha 3A (Tuba3a), mRNA [NM_001040008]                                                                                      | 12,041 |
| Chmp1a       | Rattus norvegicus chromatin modifying protein 1A (Chmp1a), mRNA [NM_001083313]                                                                         | 12,041 |
| 0            | Rattus norvegicus similar to glyceraldehyde-3-phosphate dehydrogenase (LOC296027), mRNA [XM_215798]                                                    | 12,040 |
| Adam15       | Rattus norvegicus a disintegrin and metallopeptidase domain 15 (metargidin) (Adam15), mRNA [NM_020308]                                                 | 12,040 |
| 0            | roundabout 2 [Source:RefSeq peptide;Acc:NP_115289] [ENSRNOT00000044546]                                                                                | 12,036 |
| LOC100365115 | PREDICTED: Rattus norvegicus LY6/PLAUR domain containing 6B-like (LOC100365115), mRNA [XM_002726150]                                                   | 12,035 |

|            |                                                                                                                                                      |        |
|------------|------------------------------------------------------------------------------------------------------------------------------------------------------|--------|
| Bscl2      | Rattus norvegicus Bernardinelli-Seip congenital lipodystrophy 2 homolog (human) (Bscl2), mRNA [NM_001012171]                                         | 12,035 |
| Cyp2j3     | Rattus norvegicus cytochrome P450, family 2, subfamily j, polypeptide 3 (Cyp2j3), mRNA [NM_175766]                                                   | 12,032 |
| Pgbd5      | Rattus norvegicus piggyBac transposable element derived 5 (Pgbd5), mRNA [NM_001106198]                                                               | 12,032 |
| Rg9mtd1    | Rattus norvegicus RNA (guanine-9-) methyltransferase domain containing 1 (Rg9mtd1), nuclear gene encoding mitochondrial protein, mRNA [NM_001008337] | 12,032 |
| 0          | PREDICTED: Rattus norvegicus similar to stathmin 1/oncoprotein 18) (RGD1565395), mRNA [XM_001081318]                                                 | 12,031 |
| Arsk       | Rattus norvegicus arylsulfatase family, member K (Arsk), mRNA [NM_001047917]                                                                         | 12,025 |
| Far2       | Uncharacterized protein [Source:UniProtKB/TrEMBL;Acc:D4A2S1] [ENSRNOT00000002528]                                                                    | 12,023 |
| Irs2       | Rattus norvegicus insulin receptor substrate 2 (Irs2), mRNA [NM_001168633]                                                                           | 12,022 |
| Itpk1      | Rattus norvegicus inositol 1,3,4-triphosphate 5/6 kinase (Itpk1), mRNA [NM_001191985]                                                                | 12,021 |
| RGD1563669 | Rattus norvegicus similar to Mediator of RNA polymerase II transcription, subunit 9 homolog (RGD1563669), mRNA [NM_001127302]                        | 12,021 |
| 0          | Unknown                                                                                                                                              | 12,018 |
| 0          | Unknown                                                                                                                                              | 12,018 |
| Ccnc       | Rattus norvegicus cyclin C (Ccnc), mRNA [NM_001100472]                                                                                               | 12,014 |
| 0          | Unknown                                                                                                                                              | 12,014 |
| 0          | Unknown                                                                                                                                              | 12,014 |
| Ccdc39     | Rattus norvegicus coiled-coil domain containing 39 (Ccdc39), mRNA [NM_001107667]                                                                     | 12,011 |
| Mlxip      | PREDICTED: Rattus norvegicus MLX interacting protein (Mlxip), mRNA [XM_001079320]                                                                    | 12,010 |
| Zfr        | Zinc finger RNA-binding protein [Source:UniProtKB/Swiss-Prot;Acc:Q562A2] [ENSRNOT00000016196]                                                        | 12,008 |
| Olr1516    | Rattus norvegicus olfactory receptor 1516 (Olr1516), mRNA [NM_001000038]                                                                             | 12,006 |
| Lhx6       | Rattus norvegicus LIM homeobox 6 (Lhx6), mRNA [NM_001107837]                                                                                         | 12,004 |
| LOC302192  | PREDICTED: Rattus norvegicus similar to RIKEN cDNA 1700001E04 (LOC302192), mRNA [XM_001065392]                                                       | 12,001 |
| Csda       | Rattus norvegicus cold shock domain protein A (Csda), mRNA [NM_031979]                                                                               | 12,000 |
| Slc6a9     | Rattus norvegicus solute carrier family 6 (neurotransmitter transporter, glycine), member 9 (Slc6a9), mRNA [NM_053818]                               | 12,000 |
| 0          | Uncharacterized protein [Source:UniProtKB/TrEMBL;Acc:D3ZK01] [ENSRNOT00000045607]                                                                    | 11,998 |
| Myo9b      | Rattus norvegicus myosin IXb (Myo9b), mRNA [NM_012984]                                                                                               | 11,997 |
| LOC500028  | Rattus norvegicus hypothetical protein LOC500028 (LOC500028), mRNA [NM_001047954]                                                                    | 11,996 |
| Stk3       | Rattus norvegicus serine/threonine kinase 3 (STE20 homolog, yeast) (Stk3), mRNA [NM_031735]                                                          | 11,995 |
| Lmln       | Rattus norvegicus leishmanolysin-like (metallopeptidase M8 family) (Lmln), mRNA [NM_001108843]                                                       | 11,995 |
| 0          | Unknown                                                                                                                                              | 11,994 |
| 0          | Rattus norvegicus similar to Pyruvate kinase, M2 isozyme (LOC315231), mRNA [XM_235589]                                                               | 11,993 |
| 0          | Unknown                                                                                                                                              | 11,993 |
| Tmem41b    | Rattus norvegicus transmembrane protein 41B (Tmem41b), mRNA [NM_001012358]                                                                           | 11,993 |
| 0          | Unknown                                                                                                                                              | 11,988 |

|            |                                                                                                                                  |        |
|------------|----------------------------------------------------------------------------------------------------------------------------------|--------|
| RGD1359600 | Rattus norvegicus LEA_4 domain containing protein RGD1359600 (RGD1359600), mRNA [NM_001007688]                                   | 11,987 |
| Actr3      | Rattus norvegicus ARP3 actin-related protein 3 homolog (yeast) (Actr3), mRNA [NM_031068]                                         | 11,984 |
| Nelf       | Rattus norvegicus nasal embryonic LHRH factor (Nelf), mRNA [NM_057190]                                                           | 11,984 |
| Camk2d     | Rattus norvegicus calcium/calmodulin-dependent protein kinase II delta (Camk2d), mRNA [NM_012519]                                | 11,984 |
| Pex5l      | Rattus norvegicus peroxisomal biogenesis factor 5-like (Pex5l), mRNA [NM_173152]                                                 | 11,982 |
| Rybp       | Rattus norvegicus RING1 and YY1 binding protein (Rybp), mRNA [NM_001107879]                                                      | 11,980 |
| LOC502894  | Rattus norvegicus hypothetical protein LOC502894 (LOC502894), mRNA [NM_001025064]                                                | 11,979 |
| Hdac1      | Rattus norvegicus histone deacetylase 1 (Hdac1), mRNA [NM_001025409]                                                             | 11,978 |
| 0          | PREDICTED: Rattus norvegicus similar to putative nucleic acid binding protein RY-1 (LOC685367), mRNA [XM_001063506]              | 11,977 |
| Idi2       | Rattus norvegicus isopentenyl-diphosphate delta isomerase 2 (Idi2), mRNA [NM_001192008]                                          | 11,977 |
| Ror2       | Rattus norvegicus receptor tyrosine kinase-like orphan receptor 2 (Ror2), mRNA [NM_001107339]                                    | 11,977 |
| Armc7      | Rattus norvegicus armadillo repeat containing 7 (Armc7), mRNA [NM_001127522]                                                     | 11,974 |
| Fhl3       | Rattus norvegicus four and a half LIM domains 3 (Fhl3), mRNA [NM_001107979]                                                      | 11,974 |
| Crebl2     | Rattus norvegicus cAMP responsive element binding protein-like 2 (Crebl2), mRNA [NM_001015027]                                   | 11,974 |
| 0          | Unknown                                                                                                                          | 11,973 |
| Kirrel3    | Rattus norvegicus kin of IRRE like 3 (Drosophila) (Kirrel3), mRNA [NM_001048215]                                                 | 11,972 |
| Clptm1l    | Rattus norvegicus CLPTM1-like (Clptm1l), mRNA [NM_001108240]                                                                     | 11,971 |
| Smpd3      | Rattus norvegicus sphingomyelin phosphodiesterase 3, neutral membrane (Smpd3), mRNA [NM_053605]                                  | 11,970 |
| Plekho1    | Rattus norvegicus pleckstrin homology domain containing, family O member 1 (Plekho1), mRNA [NM_001025119]                        | 11,970 |
| Sh3bp5     | Rattus norvegicus SH3-domain binding protein 5 (BTK-associated) (Sh3bp5), mRNA [NM_054011]                                       | 11,967 |
| LOC684122  | PREDICTED: Rattus norvegicus similar to development and differentiation enhancing factor-like 1 (LOC684122), mRNA [XM_001069024] | 11,967 |
| Csrnp2     | Rattus norvegicus cysteine-serine-rich nuclear protein 2 (Csrnp2), mRNA [NM_001108113]                                           | 11,966 |
| 0          | Unknown                                                                                                                          | 11,966 |
| Gja8       | Rattus norvegicus gap junction membrane channel protein alpha 8 (Gja8), mRNA [NM_153465]                                         | 11,965 |
| Dhx33      | Rattus norvegicus DEAH (Asp-Glu-Ala-His) box polypeptide 33 (Dhx33), mRNA [NM_001105802]                                         | 11,965 |
| C8g        | Rattus norvegicus complement component 8, gamma polypeptide (C8g), mRNA [NM_001106555]                                           | 11,963 |
| Ttyh1      | Rattus norvegicus tweety homolog 1 (Drosophila) (Ttyh1), mRNA [NM_001106225]                                                     | 11,957 |
| 0          | Uncharacterized protein [Source:UniProtKB/TrEMBL;Acc:D4A0B5] [ENSRNOT00000064837]                                                | 11,956 |
| Dusp3      | Rattus norvegicus dual specificity phosphatase 3 (Dusp3), mRNA [NM_001173376]                                                    | 11,955 |
| Psme4      | Rattus norvegicus proteasome (prosome, macropain) activator subunit 4 (Psme4), mRNA [NM_001025140]                               | 11,952 |
| Rptn       | Uncharacterized protein [Source:UniProtKB/TrEMBL;Acc:D3ZRF0] [ENSRNOT00000025249]                                                | 11,948 |
| B3gnt4     | Rattus norvegicus UDP-GlcNAc:betaGal beta-1,3-N-acetylglucosaminyltransferase 4 (B3gnt4), mRNA [NM_001105938]                    | 11,945 |
| Phactr3    | Rattus norvegicus phosphatase and actin regulator 3 (Phactr3), mRNA [NM_214459]                                                  | 11,945 |
| Slc24a1    | Rattus norvegicus solute carrier family 24 (sodium/potassium/calcium exchanger), member 1 (Slc24a1), mRNA [NM_020090]            | 11,945 |

|            |                                                                                                                              |        |
|------------|------------------------------------------------------------------------------------------------------------------------------|--------|
| Elmo2      | Rattus norvegicus engulfment and cell motility 2 (Elmo2), mRNA [NM_001134955]                                                | 11,945 |
| RGD1306215 | Rattus norvegicus similar to hypothetical protein MGC36831 (RGD1306215), mRNA [NM_001106556]                                 | 11,944 |
| 0          | Unknown                                                                                                                      | 11,943 |
| Coro7      | Rattus norvegicus coronin 7 (Coro7), mRNA [NM_001191639]                                                                     | 11,940 |
| 0          | Uncharacterized protein [Source:UniProtKB/TrEMBL;Acc:D3ZFF7] [ENSRNOT00000020342]                                            | 11,939 |
| 0          | Uncharacterized protein [Source:UniProtKB/TrEMBL;Acc:D3ZFV6] [ENSRNOT00000068346]                                            | 11,939 |
| Rpl10      | Rattus norvegicus ribosomal protein L10 (Rpl10), mRNA [NM_031100]                                                            | 11,937 |
| Rab15      | Rattus norvegicus RAB15, member RAS oncogene family (Rab15), mRNA [NM_198749]                                                | 11,934 |
| H1foo      | Rattus norvegicus H1 histone family, member O, oocyte-specific (H1foo), mRNA [NM_001109351]                                  | 11,931 |
| Ccdc49     | Rattus norvegicus coiled-coil domain containing 49 (Ccdc49), mRNA [NM_001108295]                                             | 11,931 |
| Akap7      | A-kinase anchoring protein 18 ,isoform delta [Source:RefSeq peptide;Acc:NP_001001801] [ENSRNOT00000017617]                   | 11,929 |
| 0          | Unknown                                                                                                                      | 11,929 |
| Trim3      | Rattus norvegicus tripartite motif-containing 3 (Trim3), mRNA [NM_031786]                                                    | 11,928 |
| 0          | Unknown                                                                                                                      | 11,926 |
| Top1       | Rattus norvegicus topoisomerase (DNA) I (Top1), mRNA [NM_022615]                                                             | 11,921 |
| Ccdc135    | Rattus norvegicus coiled-coil domain containing 135 (Ccdc135), mRNA [NM_001106169]                                           | 11,921 |
| Zfp748     | PREDICTED: Rattus norvegicus zinc finger protein 748 (Zfp748), mRNA [XM_001056356]                                           | 11,921 |
| F2r1       | Rattus norvegicus coagulation factor II (thrombin) receptor-like 1 (F2r1), mRNA [NM_053897]                                  | 11,918 |
| Rrbp1      | PREDICTED: Rattus norvegicus ribosome binding protein 1, transcript variant 3 (Rrbp1), mRNA [XM_001053669]                   | 11,916 |
| Eps8       | Uncharacterized protein [Source:UniProtKB/TrEMBL;Acc:D3ZWU6] [ENSRNOT00000009328]                                            | 11,915 |
| 0          | Unknown                                                                                                                      | 11,915 |
| 0          | Unknown                                                                                                                      | 11,915 |
| Padi1      | Rattus norvegicus peptidyl arginine deiminase, type I (Padi1), mRNA [NM_019332]                                              | 11,913 |
| RGD1306926 | Uncharacterized protein [Source:UniProtKB/TrEMBL;Acc:D3ZX03] [ENSRNOT00000054974]                                            | 11,913 |
| 0          | Unknown                                                                                                                      | 11,907 |
| RGD1306556 | PREDICTED: Rattus norvegicus similar to hypothetical protein A530094D01 (RGD1306556), mRNA [XM_001080521]                    | 11,906 |
| Pten       | Rattus norvegicus phosphatase and tensin homolog (Pten), mRNA [NM_031606]                                                    | 11,906 |
| Bin3       | Rattus norvegicus bridging integrator 3 (Bin3), mRNA [NM_001013186]                                                          | 11,905 |
| Rabgap1l   | Rattus norvegicus RAB GTPase activating protein 1-like (Rabgap1l), mRNA [NM_001107190]                                       | 11,904 |
| Mtss1      | Rattus norvegicus metastasis suppressor 1 (Mtss1), mRNA [NM_001130563]                                                       | 11,904 |
| Amn1       | Rattus norvegicus antagonist of mitotic exit network 1 homolog (S. cerevisiae) (Amn1), mRNA [NM_001008333]                   | 11,903 |
| Fam122b    | Rattus norvegicus family with sequence similarity 122B (Fam122b), mRNA [NM_001166586]                                        | 11,903 |
| Pcmdt2     | Rattus norvegicus protein-L-isoaspartate (D-aspartate) O-methyltransferase domain containing 2 (Pcmdt2), mRNA [NM_001107810] | 11,903 |
| Slc20a2    | Rattus norvegicus solute carrier family 20 (phosphate transporter), member 2 (Slc20a2), mRNA [NM_017223]                     | 11,903 |

|            |                                                                                                                                             |        |
|------------|---------------------------------------------------------------------------------------------------------------------------------------------|--------|
| Hist1h1b   | Rattus norvegicus histone cluster 1, H1b (Hist1h1b), mRNA [NM_001109417]                                                                    | 11,899 |
| 0          | Rattus norvegicus similar to glyceraldehyde-3-phosphate dehydrogenase (phosphorylating) (EC 1.2.1.12) - mouse (LOC313443), mRNA [XM_233295] | 11,898 |
| Neu1       | Rattus norvegicus sialidase 1 (lysosomal sialidase) (Neu1), mRNA [NM_031522]                                                                | 11,897 |
| Dgkg       | Rattus norvegicus diacylglycerol kinase, gamma (Dgkg), mRNA [NM_013126]                                                                     | 11,894 |
| Fhdc1      | Rattus norvegicus FH2 domain containing 1 (Fhdc1), mRNA [NM_001106437]                                                                      | 11,892 |
| Cyp2s1     | Rattus norvegicus cytochrome P450, family 2, subfamily s, polypeptide 1 (Cyp2s1), mRNA [NM_001107495]                                       | 11,890 |
| 0          | Rattus norvegicus similar to 60S ribosomal protein L23a (LOC299190), mRNA [XM_234397]                                                       | 11,888 |
| Ttc7b      | Rattus norvegicus tetratricopeptide repeat domain 7B (Ttc7b), mRNA [NM_001108719]                                                           | 11,887 |
| Atp7b      | Rattus norvegicus ATPase, Cu <sup>++</sup> transporting, beta polypeptide (Atp7b), mRNA [NM_012511]                                         | 11,887 |
| Lrfn2      | Rattus norvegicus leucine rich repeat and fibronectin type III domain containing 2 (Lrfn2), mRNA [NM_001039699]                             | 11,885 |
| M6prbp1    | PREDICTED: Rattus norvegicus mannose-6-phosphate receptor binding protein 1 (M6prbp1), mRNA [XM_001061015]                                  | 11,883 |
| Znf667     | Rattus norvegicus zinc finger protein 667 (Znf667), mRNA [NM_001008557]                                                                     | 11,882 |
| 0          | STML1_MOUSE (Q8CI66) Stomatin-like protein 1 (SLP-1), partial (6%) [TC590815]                                                               | 11,880 |
| Pqlc1      | Rattus norvegicus PQ loop repeat containing 1 (Pqlc1), mRNA [NM_001013189]                                                                  | 11,879 |
| 0          | Uncharacterized protein [Source:UniProtKB/TrEMBL;Acc:D3ZU50] [ENSRNOT0000001479]                                                            | 11,878 |
| Kcnb1      | Rattus norvegicus potassium voltage gated channel, Shab-related subfamily, member 1 (Kcnb1), mRNA [NM_013186]                               | 11,878 |
| Tspyl4     | Rattus norvegicus TSPY-like 4 (Tspyl4), mRNA [NM_001012075]                                                                                 | 11,876 |
| 0          | Unknown                                                                                                                                     | 11,875 |
| 0          | Unknown                                                                                                                                     | 11,875 |
| Spcs2      | Rattus norvegicus signal peptidase complex subunit 2 homolog ( <i>S. cerevisiae</i> ) (Spcs2), mRNA [NM_001191601]                          | 11,871 |
| RGD1561678 | PREDICTED: Rattus norvegicus similar to Ten-m1 (RGD1561678), mRNA [XM_002730177]                                                            | 11,871 |
| Ift80      | Rattus norvegicus intraflagellar transport 80 homolog ( <i>Chlamydomonas</i> ) (Ift80), mRNA [NM_001013911]                                 | 11,870 |
| 0          | Unknown                                                                                                                                     | 11,870 |
| Pigs       | Rattus norvegicus phosphatidylinositol glycan anchor biosynthesis, class S (Pigs), mRNA [NM_001006602]                                      | 11,870 |
| RGD1307722 | Rattus norvegicus similar to hypothetical protein MGC20700 (RGD1307722), mRNA [NM_001108730]                                                | 11,868 |
| Tox4       | Rattus norvegicus TOX high mobility group box family member 4 (Tox4), mRNA [NM_173324]                                                      | 11,866 |
| Cd200      | Rattus norvegicus Cd200 molecule (Cd200), mRNA [NM_031518]                                                                                  | 11,865 |
| 0          | Unknown                                                                                                                                     | 11,865 |
| Sorcs2     | Rattus norvegicus sortilin-related VPS10 domain containing receptor 2 (Sorcs2), mRNA [NM_001107225]                                         | 11,864 |
| Ccdc147    | Uncharacterized protein [Source:UniProtKB/TrEMBL;Acc:D3ZGP0] [ENSRNOT00000017283]                                                           | 11,864 |
| Casp9      | Rattus norvegicus caspase 9, apoptosis-related cysteine peptidase (Casp9), mRNA [NM_031632]                                                 | 11,863 |
| Ng23       | Rattus norvegicus Ng23 protein (Ng23), mRNA [NM_001004069]                                                                                  | 11,862 |
| Atp6v0a2   | Rattus norvegicus ATPase, H <sup>+</sup> transporting, lysosomal V0 subunit A2 (Atp6v0a2), mRNA [NM_053775]                                 | 11,859 |

|            |                                                                                                                                                                                                                                                                  |        |
|------------|------------------------------------------------------------------------------------------------------------------------------------------------------------------------------------------------------------------------------------------------------------------|--------|
| LOC683713  | Rattus norvegicus similar to Galactosylceramide sulfotransferase (GalCer sulfotransferase) (Cerebroside sulfotransferase) (3-phosphoadenylylsulfate:galactosylceramide 3-sulfotransferase) (3-phosphoadenosine-5-phosphosulfate:GalCer sulfotransferase) (LOC683 | 11,858 |
| Tram1      | Rattus norvegicus translocation associated membrane protein 1 (Tram1), mRNA [NM_001007701]                                                                                                                                                                       | 11,858 |
| 0          | Unknown                                                                                                                                                                                                                                                          | 11,855 |
| Npap60     | Rattus norvegicus nuclear pore associated protein (Npap60), mRNA [NM_012991]                                                                                                                                                                                     | 11,854 |
| Cnr1       | Rattus norvegicus cannabinoid receptor 1 (brain) (Cnr1), mRNA [NM_012784]                                                                                                                                                                                        | 11,851 |
| Rftn2      | Uncharacterized protein [Source:UniProtKB/TrEMBL;Acc:D3ZD65] [ENSRNOT00000020910]                                                                                                                                                                                | 11,850 |
| RGD1559971 | PREDICTED: Rattus norvegicus similar to Na <sup>+</sup> dependent glucose transporter 1 (RGD1559971), mRNA [XM_001062835]                                                                                                                                        | 11,848 |
| Phf20I1    | Rattus norvegicus PHD finger protein 20-like 1, mRNA (cDNA clone IMAGE:7389535), complete cds. [BC096896]                                                                                                                                                        | 11,847 |
| Ppm1e      | Rattus norvegicus protein phosphatase 1E (PP2C domain containing) (Ppm1e), mRNA [NM_198773]                                                                                                                                                                      | 11,846 |
| Siah1a     | Rattus norvegicus seven in absentia 1A (Siah1a), mRNA [NM_080905]                                                                                                                                                                                                | 11,846 |
| Lypd6b     | Rattus norvegicus LY6/PLAUR domain containing 6B (Lypd6b), mRNA [NM_001134580]                                                                                                                                                                                   | 11,845 |
| 0          | PREDICTED: Rattus norvegicus similar to monoacylglycerol O-acyltransferase 2 (LOC687054), mRNA [XM_001076877]                                                                                                                                                    | 11,845 |
| LOC691797  | PREDICTED: Rattus norvegicus similar to developmental pluripotency-associated 3 (LOC691797), mRNA [XM_001079667]                                                                                                                                                 | 11,844 |
| RT1-CE11   | Rattus norvegicus RT1 class I, locus CE11 (RT1-CE11), mRNA [NM_001008834]                                                                                                                                                                                        | 11,843 |
| 0          | Unknown                                                                                                                                                                                                                                                          | 11,843 |
| RGD1562989 | PREDICTED: Rattus norvegicus similar to serine/threonine kinase (RGD1562989), mRNA [XM_229637]                                                                                                                                                                   | 11,839 |
| 0          | Unknown                                                                                                                                                                                                                                                          | 11,838 |
| Sdsl       | Rattus norvegicus serine dehydratase-like (Sdsl), mRNA [NM_001108336]                                                                                                                                                                                            | 11,837 |
| Vdac3      | Rattus norvegicus voltage-dependent anion channel 3 (Vdac3), mRNA [NM_031355]                                                                                                                                                                                    | 11,834 |
| Lmod2      | Rattus norvegicus leiomodoin 2 (cardiac) (Lmod2), mRNA [NM_001100964]                                                                                                                                                                                            | 11,829 |
| RGD1306613 | Rattus norvegicus similar to RIKEN cDNA 1600012F09 (RGD1306613), mRNA [NM_001107356]                                                                                                                                                                             | 11,826 |
| Hnrnpu     | Rattus norvegicus heterogeneous nuclear ribonucleoprotein U (Hnrnpu), mRNA [NM_057139]                                                                                                                                                                           | 11,826 |
| LOC691365  | Uncharacterized protein [Source:UniProtKB/TrEMBL;Acc:D3ZMI8] [ENSRNOT00000048115]                                                                                                                                                                                | 11,825 |
| Lgi4       | Rattus norvegicus leucine-rich repeat LGI family, member 4 (Lgi4), mRNA [NM_199499]                                                                                                                                                                              | 11,823 |
| Scn1b      | Rattus norvegicus sodium channel, voltage-gated, type I, beta (Scn1b), mRNA [NM_017288]                                                                                                                                                                          | 11,819 |
| Zfp385c    | Uncharacterized protein [Source:UniProtKB/TrEMBL;Acc:D3ZE95] [ENSRNOT00000067868]                                                                                                                                                                                | 11,818 |
| Usp53      | Rattus norvegicus ubiquitin specific peptidase 53 (Usp53), mRNA [NM_001106468]                                                                                                                                                                                   | 11,818 |
| Tm9sf4     | Rattus norvegicus transmembrane 9 superfamily protein member 4 (Tm9sf4), mRNA [NM_001025649]                                                                                                                                                                     | 11,818 |
| Mrgprb13   | Rattus norvegicus MAS-related GPR, member B13 (Mrgprb13), mRNA [NM_001002283]                                                                                                                                                                                    | 11,817 |
| Chmp4b     | PREDICTED: Rattus norvegicus chromatin modifying protein 4B (Chmp4b), mRNA [XM_001073409]                                                                                                                                                                        | 11,815 |
| Dnmt3b     | Rattus norvegicus DNA (cytosine-5-)-methyltransferase 3 beta (Dnmt3b), mRNA [NM_001003959]                                                                                                                                                                       | 11,814 |
| 0          | Rattus norvegicus similar to glyceraldehyde-3-phosphate dehydrogenase (phosphorylating) (EC 1.2.1.12) - mouse (LOC365427), mRNA [XM_345008]                                                                                                                      | 11,814 |



|         |                                                                                                                                                 |        |
|---------|-------------------------------------------------------------------------------------------------------------------------------------------------|--------|
| Kif3b   | Rattus norvegicus kinesin family member 3B (Kif3b), mRNA [NM_001106529]                                                                         | 11,812 |
| 0       | Uncharacterized protein [Source:UniProtKB/TrEMBL;Acc:D3ZKR7] [ENSRNOT00000046075]                                                               | 11,809 |
| Ranbp10 | Rattus norvegicus RAN binding protein 10 (Ranbp10), mRNA [NM_001135875]                                                                         | 11,808 |
| 0       | PREDICTED: Rattus norvegicus similar to centromere autoantigen H (LOC684611), mRNA [XM_001071235]                                               | 11,807 |
| Tmx1    | Rattus norvegicus thioredoxin-related transmembrane protein 1 (Tmx1), mRNA [NM_001024800]                                                       | 11,805 |
| Xpnpep3 | Rattus norvegicus X-prolyl aminopeptidase (aminopeptidase P) 3, putative (Xpnpep3), mRNA [NM_001130582]                                         | 11,805 |
| Pank2   | Rattus norvegicus pantothenate kinase 2 (Hallervorden-Spatz syndrome) (Pank2), nuclear gene encoding mitochondrial protein, mRNA [NM_001106513] | 11,802 |
| Pip5k1a | Rattus norvegicus phosphatidylinositol-4-phosphate 5-kinase, type 1, alpha (Pip5k1a), mRNA [NM_001042621]                                       | 11,802 |
| 0       | Unknown                                                                                                                                         | 11,801 |
| Kcnk2   | Rattus norvegicus potassium channel, subfamily K, member 2 (Kcnk2), transcript variant 2, mRNA [NM_172042]                                      | 11,801 |
| Uap1    | Rattus norvegicus UDP-N-acteylglucosamine pyrophosphorylase 1 (Uap1), mRNA [NM_001191930]                                                       | 11,800 |
| Aup1    | Rattus norvegicus ancient ubiquitous protein 1 (Aup1), mRNA [NM_001079899]                                                                      | 11,800 |
| Prkd2   | Rattus norvegicus protein kinase D2 (Prkd2), mRNA [NM_001013895]                                                                                | 11,799 |
| Tmx2    | Rattus norvegicus thioredoxin-related transmembrane protein 2 (Tmx2), mRNA [NM_001007643]                                                       | 11,799 |
| Yipf2   | Rattus norvegicus Yip1 domain family, member 2 (Yipf2), mRNA [NM_001014208]                                                                     | 11,798 |
| 0       | Unknown                                                                                                                                         | 11,798 |
| Spred3  | Rattus norvegicus sprouty-related, EVH1 domain containing 3 (Spred3), mRNA [NM_001173344]                                                       | 11,797 |
| 0       | Unknown                                                                                                                                         | 11,794 |
| Vom2r41 | Rattus norvegicus vomeronasal 2 receptor, 41 (Vom2r41), mRNA [NM_001099500]                                                                     | 11,793 |
| Gca     | Rattus norvegicus grancalcin (Gca), mRNA [NM_001106483]                                                                                         | 11,791 |
| Gnas    | Rattus norvegicus GNAS complex locus (Gnas), transcript variant 3, mRNA [NM_019132]                                                             | 11,791 |
| 0       | Unknown                                                                                                                                         | 11,790 |
| Fam110a | Rattus norvegicus family with sequence similarity 110, member A (Fam110a), mRNA [NM_001014050]                                                  | 11,788 |
| Olr689  | Rattus norvegicus olfactory receptor 689 (Olr689), mRNA [NM_001000997]                                                                          | 11,787 |
| Cyp4x1  | Rattus norvegicus cytochrome P450, family 4, subfamily x, polypeptide 1 (Cyp4x1), mRNA [NM_145675]                                              | 11,787 |
| Znf76   | Rattus norvegicus zinc finger protein 76 (expressed in testis) (Znf76), mRNA [NM_001134755]                                                     | 11,785 |
| Scnm1   | Rattus norvegicus sodium channel modifier 1 (Scnm1), mRNA [NM_001107696]                                                                        | 11,785 |
| Fzd3    | Rattus norvegicus frizzled homolog 3 (Drosophila) (Fzd3), mRNA [NM_153474]                                                                      | 11,783 |
| Acad11  | Rattus norvegicus acyl-Coenzyme A dehydrogenase family, member 11 (Acad11), mRNA [NM_001108181]                                                 | 11,782 |
| Parp6   | Rattus norvegicus poly (ADP-ribose) polymerase family, member 6 (Parp6), mRNA [NM_001106828]                                                    | 11,782 |
| Apaf1   | Rattus norvegicus apoptotic peptidase activating factor 1 (Apaf1), mRNA [NM_023979]                                                             | 11,778 |
| Dock9   | Rattus norvegicus dedicator of cytokinesis 9 (Dock9), mRNA [NM_001105759]                                                                       | 11,775 |
| Pcdhb15 | PREDICTED: Rattus norvegicus protocadherin beta 15 (Pcdhb15), mRNA [XM_001055818]                                                               | 11,774 |

|            |                                                                                                                                |        |
|------------|--------------------------------------------------------------------------------------------------------------------------------|--------|
| Traf4      | Rattus norvegicus Tnf receptor associated factor 4 (Traf4), mRNA [NM_001107017]                                                | 11,774 |
| Thrap3     | Rattus norvegicus thyroid hormone receptor associated protein 3 (Thrap3), mRNA [NM_001009693]                                  | 11,771 |
| Hyal3      | Rattus norvegicus hyaluronoglucosaminidase 3 (Hyal3), mRNA [NM_207599]                                                         | 11,771 |
| Ptma       | Rattus norvegicus prothymosin alpha (Ptma), mRNA [NM_021740]                                                                   | 11,771 |
| Grifin     | Rattus norvegicus galectin-related inter-fiber protein (Grifin), mRNA [NM_057187]                                              | 11,770 |
| Ncoa6      | Nuclear receptor coactivator 6 [Source:UniProtKB/Swiss-Prot;Acc:Q9JLI4] [ENSRNOT00000024714]                                   | 11,768 |
| Pacrg      | Rattus norvegicus Park2 co-regulated (Pacrg), mRNA [NM_001077677]                                                              | 11,768 |
| LOC682215  | PREDICTED: Rattus norvegicus hypothetical protein LOC682215 (LOC682215), mRNA [XM_001060486]                                   | 11,767 |
| Slc22a8    | Rattus norvegicus solute carrier family 22 (organic anion transporter), member 8 (Slc22a8), mRNA [NM_031332]                   | 11,767 |
| RGD1304878 | PREDICTED: Rattus norvegicus similar to 2410024A21Rik protein (RGD1304878), miscRNA [XR_005460]                                | 11,766 |
| Pftk1      | Rattus norvegicus PFTAIRES protein kinase 1 (Pftk1), mRNA [NM_001108617]                                                       | 11,763 |
| 0          | protein phosphatase 2, regulatory subunit B (B56), delta isoform Gene [Source:MGI Symbol;Acc:MGI:2388481] [ENSRNOT00000022862] | 11,761 |
| LOC690000  | Uncharacterized protein [Source:UniProtKB/TrEMBL;Acc:D3ZWS2] [ENSRNOT00000020079]                                              | 11,761 |
| 0          | Uncharacterized protein [Source:UniProtKB/TrEMBL;Acc:D3ZEZ6] [ENSRNOT00000066536]                                              | 11,758 |
| Sstr5      | Rattus norvegicus somatostatin receptor 5 (Sstr5), mRNA [NM_012882]                                                            | 11,757 |
| Slc36a4    | Rattus norvegicus solute carrier family 36 (proton/amino acid symporter), member 4 (Slc36a4), mRNA [NM_001108127]              | 11,757 |
| Nek9       | Rattus norvegicus NIMA (never in mitosis gene a)- related kinase 9 (Nek9), mRNA [NM_001106747]                                 | 11,755 |
| Pofut1     | Rattus norvegicus protein O-fucosyltransferase 1 (Pofut1), mRNA [NM_001002278]                                                 | 11,755 |
| Brms1l     | Rattus norvegicus breast cancer metastasis-suppressor 1-like (Brms1l), mRNA [NM_001106731]                                     | 11,755 |
| Vasn       | Rattus norvegicus vasorin (Vasn), mRNA [NM_001109382]                                                                          | 11,755 |
| Slc43a2    | Rattus norvegicus solute carrier family 43, member 2 (Slc43a2), mRNA [NM_001105812]                                            | 11,746 |
| 0          | Unknown                                                                                                                        | 11,745 |
| 0          | Rattus norvegicus TL0ABA36YD02 mRNA sequence. [FQ210020]                                                                       | 11,744 |
| Pnoc       | Rattus norvegicus prepronociceptin (Pnoc), mRNA [NM_013007]                                                                    | 11,742 |
| Mast3      | Rattus norvegicus microtubule associated serine/threonine kinase 3 (Mast3), mRNA [NM_001134796]                                | 11,741 |
| LOC688459  | Rattus norvegicus hypothetical protein LOC688459 (LOC688459), mRNA [NM_001109502]                                              | 11,741 |
| Cbp        | Rattus norvegicus Csk binding protein (Cbp), mRNA [NM_022253]                                                                  | 11,741 |
| Efha2      | Rattus norvegicus EF hand domain family, member A2 (Efha2), mRNA [NM_001191892]                                                | 11,741 |
| Chst15     | Rattus norvegicus carbohydrate (N-acetylgalactosamine 4-sulfate 6-O) sulfotransferase 15 (Chst15), mRNA [NM_173310]            | 11,740 |
| 0          | Unknown                                                                                                                        | 11,740 |
| Fam120b    | Rattus norvegicus family with sequence similarity 120B (Fam120b), mRNA [NM_001107466]                                          | 11,740 |
| Cdk6       | Rattus norvegicus cyclin-dependent kinase 6 (Cdk6), mRNA [NM_001191861]                                                        | 11,739 |
| LOC686295  | PREDICTED: Rattus norvegicus similar to CG17293-PA (LOC686295), mRNA [XM_001073342]                                            | 11,739 |
| Ikkkb      | Rattus norvegicus inhibitor of kappa light polypeptide gene enhancer in B-cells, kinase beta (Ikkkb), mRNA [NM_053355]         | 11,739 |

|            |                                                                                                                                                |        |
|------------|------------------------------------------------------------------------------------------------------------------------------------------------|--------|
| Myf5       | Rattus norvegicus myogenic factor 5 (Myf5), mRNA [NM_001106783]                                                                                | 11,737 |
| Kras       | Rattus norvegicus v-Ki-ras2 Kirsten rat sarcoma viral oncogene homolog (Kras), mRNA [NM_031515]                                                | 11,734 |
| RGD1559513 | PREDICTED: Rattus norvegicus similar to DEAD (Asp-Glu-Ala-Asp) box polypeptide 41 (RGD1559513), mRNA [XM_001059856]                            | 11,730 |
| Gpr108     | Rattus norvegicus G protein-coupled receptor 108 (Gpr108), mRNA [NM_199399]                                                                    | 11,730 |
| RGD1563307 | Uncharacterized protein [Source:UniProtKB/TrEMBL;Acc:D4A466] [ENSRNOT00000030832]                                                              | 11,726 |
| Adam10     | PREDICTED: Rattus norvegicus ADAM metallopeptidase domain 10 (Adam10), mRNA [XM_217197]                                                        | 11,722 |
| 0          | Unknown                                                                                                                                        | 11,721 |
| Ubac2      | Rattus norvegicus UBA domain containing 2 (Ubac2), mRNA [NM_001034937]                                                                         | 11,721 |
| 0          | Unknown                                                                                                                                        | 11,721 |
| Spata6     | Rattus norvegicus spermatogenesis associated 6 (Spata6), mRNA [NM_134392]                                                                      | 11,721 |
| 0          | Unknown                                                                                                                                        | 11,720 |
| Fam84a     | Rattus norvegicus family with sequence similarity 84, member A (Fam84a), mRNA [NM_001127299]                                                   | 11,719 |
| 0          | PREDICTED: Rattus norvegicus similar to Mblk1-related protein-2 (LOC679031), mRNA [XM_001054322]                                               | 11,717 |
| Arl2       | Rattus norvegicus ADP-ribosylation factor-like 2 (Arl2), mRNA [NM_031711]                                                                      | 11,717 |
| Rin2       | Rattus norvegicus Ras and Rab interactor 2 (Rin2), mRNA [NM_001107786]                                                                         | 11,716 |
| Znf593     | Rattus norvegicus zinc finger protein 593 (Znf593), mRNA [NM_001106689]                                                                        | 11,715 |
| Fads6      | Rattus norvegicus fatty acid desaturase domain family, member 6 (Fads6), mRNA [NM_001107064]                                                   | 11,714 |
| Pcdhb13    | Protocadherin-T4 [Source:UniProtKB/TrEMBL;Acc:Q9JIU1] [ENSRNOT00000027172]                                                                     | 11,713 |
| Abcb7      | Rattus norvegicus ATP-binding cassette, subfamily B (MDR/TAP), member 7 (Abcb7), nuclear gene encoding mitochondrial protein, mRNA [NM_212518] | 11,713 |
| M6pr       | Rattus norvegicus mannose-6-phosphate receptor, cation dependent (M6pr), mRNA [NM_001007700]                                                   | 11,712 |
| 0          | AGENCOURT_26626347 NIH_MGC_253 Rattus norvegicus cDNA clone IMAGE:7301841 5', mRNA sequence [CO388903]                                         | 11,712 |
| G3bp1      | Rattus norvegicus GTPase activating protein (SH3 domain) binding protein 1 (G3bp1), mRNA [NM_133565]                                           | 11,710 |
| Zdhhc1     | Rattus norvegicus zinc finger, DHHC-type containing 1 (Zdhhc1), mRNA [NM_001039099]                                                            | 11,710 |
| Zfp426     | Rattus norvegicus zinc finger protein 426 (Zfp426), mRNA [NM_001079943]                                                                        | 11,707 |
| 0          | Uncharacterized protein [Source:UniProtKB/TrEMBL;Acc:D3ZUZ3] [ENSRNOT00000045859]                                                              | 11,707 |
| 0          | Unknown                                                                                                                                        | 11,706 |
| Ndufaf1    | Rattus norvegicus NADH dehydrogenase (ubiquinone) 1 alpha subcomplex, assembly factor 1 (Ndufaf1), mRNA [NM_001106500]                         | 11,704 |
| Cyp2s1     | Rattus norvegicus cytochrome P450, family 2, subfamily s, polypeptide 1 (Cyp2s1), mRNA [NM_001107495]                                          | 11,704 |
| 0          | Unknown                                                                                                                                        | 11,703 |
| 0          | Tetratricopeptide repeat protein GNN [Source:UniProtKB/Swiss-Prot;Acc:Q6P3V7] [ENSRNOT00000059545]                                             | 11,700 |
| Pdap1      | Rattus norvegicus PDGFA associated protein 1 (Pdap1), mRNA [NM_022595]                                                                         | 11,699 |
| Def8       | Rattus norvegicus differentially expressed in FDCP 8 homolog (mouse) (Def8), mRNA [NM_001024774]                                               | 11,699 |
| 0          | Unknown                                                                                                                                        | 11,698 |

|           |                                                                                                                                                                        |        |
|-----------|------------------------------------------------------------------------------------------------------------------------------------------------------------------------|--------|
| Zfp53     | Rattus norvegicus zinc finger protein 53 (Zfp53), mRNA [NM_001107468]                                                                                                  | 11,698 |
| Zar1l     | PREDICTED: Rattus norvegicus similar to Zygote arrest 1 (Oocyte-specific maternal effect factor) (LOC689594), mRNA [XM_001071298]                                      | 11,697 |
| Chtf8     | Rattus norvegicus CTF8, chromosome transmission fidelity factor 8 homolog (S. cerevisiae) (Chtf8), mRNA [NM_001194951]                                                 | 11,695 |
| Kif1b     | Rattus norvegicus kinesin family member 1B (Kif1b), mRNA [NM_057200]                                                                                                   | 11,694 |
| Gimap9    | Rattus norvegicus GTPase, IMAP family member 9 (Gimap9), mRNA [NM_001008398]                                                                                           | 11,694 |
| Timp2     | Rattus norvegicus TIMP metalloproteinase inhibitor 2 (Timp2), mRNA [NM_021989]                                                                                         | 11,692 |
| Dcun1d1   | Rattus norvegicus DCN1, defective in cullin neddylation 1, domain containing 1 (S. cerevisiae) (Dcun1d1), mRNA [NM_001107668]                                          | 11,690 |
| Cacnb4    | Rattus norvegicus calcium channel, voltage-dependent, beta 4 subunit (Cacnb4), mRNA [NM_001105733]                                                                     | 11,688 |
| Zfp322a   | Rattus norvegicus zinc finger protein 322a (Zfp322a), mRNA [NM_001135084]                                                                                              | 11,687 |
| 0         | Q8CHN9_RAT (Q8CHN9) Transcription factor 1, complete [TC573664]                                                                                                        | 11,686 |
| Oprm1     | Rattus norvegicus opioid receptor, mu 1 (Oprm1), transcript variant MOR-1A, mRNA [NM_001038597]                                                                        | 11,686 |
| Abo       | Rattus norvegicus ABO blood group (transferase A, alpha 1-3-N-acetylgalactosaminyltransferase; transferase B, alpha 1-3-galactosyltransferase) (Abo), mRNA [NM_023094] | 11,685 |
| Ccdc28a   | Rattus norvegicus coiled-coil domain containing 28A (Ccdc28a), mRNA [NM_001037789]                                                                                     | 11,685 |
| Birc5     | Rattus norvegicus baculoviral IAP repeat-containing 5 (Birc5), mRNA [NM_022274]                                                                                        | 11,682 |
| Rpl28     | Rattus norvegicus ribosomal protein L28 (Rpl28), mRNA [NM_022697]                                                                                                      | 11,681 |
| Rgs2      | Rattus norvegicus regulator of G-protein signaling 2 (Rgs2), mRNA [NM_053453]                                                                                          | 11,679 |
| Clcn5     | Rattus norvegicus chloride channel 5 (Clcn5), mRNA [NM_017106]                                                                                                         | 11,678 |
| Fabp12    | Rattus norvegicus fatty acid binding protein 12 (Fabp12), mRNA [NM_001134614]                                                                                          | 11,677 |
| Sppl2a    | Rattus norvegicus signal peptide peptidase-like 2A (Sppl2a), mRNA [NM_001107770]                                                                                       | 11,675 |
| Xpnpep3   | Rattus norvegicus X-prolyl aminopeptidase (aminopeptidase P) 3, putative (Xpnpep3), mRNA [NM_001130582]                                                                | 11,675 |
| Il20      | Rattus norvegicus interleukin 20 (Il20), mRNA [NM_001143881]                                                                                                           | 11,674 |
| Armc5     | Rattus norvegicus armadillo repeat containing 5 (Armc5), mRNA [NM_001009455]                                                                                           | 11,674 |
| Slc4a10   | Rattus norvegicus solute carrier family 4, sodium bicarbonate transporter, member 10 (Slc4a10), mRNA [NM_178092]                                                       | 11,671 |
| 0         | Unknown                                                                                                                                                                | 11,670 |
| B2m       | Rattus norvegicus beta-2 microglobulin (B2m), mRNA [NM_012512]                                                                                                         | 11,669 |
| Ccr9      | Rattus norvegicus chemokine (C-C motif) receptor 9 (Ccr9), mRNA [NM_172329]                                                                                            | 11,667 |
| Nacc1     | Rattus norvegicus nucleus accumbens associated 1, BEN and BTB (POZ) domain containing (Nacc1), mRNA [NM_134413]                                                        | 11,665 |
| LOC691786 | PREDICTED: Rattus norvegicus similar to Stannin (LOC691786), mRNA [XM_001079624]                                                                                       | 11,664 |
| Kctd5     | Rattus norvegicus potassium channel tetramerisation domain containing 5 (Kctd5), mRNA [NM_001105768]                                                                   | 11,664 |
| 0         | Unknown                                                                                                                                                                | 11,660 |
| 0         | Rattus norvegicus similar to RIKEN cDNA A830059I20 (LOC299265), mRNA [XM_234480]                                                                                       | 11,659 |
| RT1-DMb   | Rattus norvegicus RT1 class II, locus DMb (RT1-DMb), mRNA [NM_198740]                                                                                                  | 11,659 |
| Rap1b     | Rattus norvegicus RAP1B, member of RAS oncogene family (Rap1b), mRNA [NM_134346]                                                                                       | 11,658 |

|              |                                                                                                                                       |        |
|--------------|---------------------------------------------------------------------------------------------------------------------------------------|--------|
| Grpr         | Rattus norvegicus gastrin releasing peptide receptor (Grpr), mRNA [NM_012706]                                                         | 11,658 |
| LOC100364244 | PREDICTED: Rattus norvegicus rCG43589-like (LOC100364244), mRNA [XM_002727401]                                                        | 11,657 |
| Map3k10      | Rattus norvegicus mitogen activated protein kinase kinase kinase 10 (Map3k10), mRNA [NM_001191621]                                    | 11,655 |
| 0            | Unknown                                                                                                                               | 11,654 |
| 0            | Unknown                                                                                                                               | 11,653 |
| Arpp21       | Rattus norvegicus cAMP-regulated phosphoprotein 21 (Arpp21), transcript variant 1, mRNA [NM_001135046]                                | 11,653 |
| 0            | Uncharacterized protein [Source:UniProtKB/TrEMBL;Acc:D3ZUQ8] [ENSRNOT00000032636]                                                     | 11,653 |
| Arhgef6      | Rattus norvegicus Rac/Cdc42 guanine nucleotide exchange factor (GEF) 6 (Arhgef6), mRNA [NM_001005565]                                 | 11,652 |
| Camk2b       | Rattus norvegicus calcium/calmodulin-dependent protein kinase II beta (Camk2b), transcript variant 1, mRNA [NM_001042354]             | 11,651 |
| Rufy3        | Rattus norvegicus RUN and FYVE domain containing 3 (Rufy3), mRNA [NM_001025127]                                                       | 11,650 |
| Abcc10       | Rattus norvegicus ATP-binding cassette, subfamily C (CFTR/MRP), member 10 (Abcc10), mRNA [NM_001108201]                               | 11,649 |
| Efhc1        | Rattus norvegicus EF-hand domain (C-terminal) containing 1 (Efhc1), mRNA [NM_001122947]                                               | 11,648 |
| LOC500893    | Rattus norvegicus similar to GLI-Kruppel family member GLI4 (LOC500893), mRNA [NM_001029926]                                          | 11,646 |
| Capn2        | Rattus norvegicus calpain 2 (Capn2), mRNA [NM_017116]                                                                                 | 11,646 |
| Dnm2         | Rattus norvegicus dynamin 2 (Dnm2), mRNA [NM_013199]                                                                                  | 11,645 |
| Tef          | Rattus norvegicus thyrotrophic embryonic factor (Tef), mRNA [NM_019194]                                                               | 11,645 |
| Ptpro        | Rattus norvegicus protein tyrosine phosphatase, receptor type, O (Ptpro), mRNA [NM_017336]                                            | 11,644 |
| Dnmbp        | PREDICTED: Rattus norvegicus dynamin binding protein (Dnmbp), mRNA [XM_219860]                                                        | 11,641 |
| LOC690137    | PREDICTED: Rattus norvegicus similar to transmembrane protein induced by tumor necrosis factor alpha (LOC690137), mRNA [XM_001073419] | 11,640 |
| Chdh         | Rattus norvegicus choline dehydrogenase (Chdh), nuclear gene encoding mitochondrial protein, mRNA [NM_198731]                         | 11,638 |
| 0            | Unknown                                                                                                                               | 11,638 |
| Parp16       | Rattus norvegicus poly (ADP-ribose) polymerase family, member 16 (Parp16), mRNA [NM_001014093]                                        | 11,638 |
| Rpgr         | Rattus norvegicus retinitis pigmentosa GTPase regulator (Rpgr), mRNA [NM_001127601]                                                   | 11,636 |
| Oxr1         | Rattus norvegicus oxidation resistance 1 (Oxr1), transcript variant 1, mRNA [NM_001197907]                                            | 11,636 |
| Slc13a5      | Rattus norvegicus solute carrier family 13 (sodium-dependent citrate transporter), member 5 (Slc13a5), mRNA [NM_170668]               | 11,636 |
| Epb49        | Rattus norvegicus erythrocyte membrane protein band 4.9 (dematin) (Epb49), mRNA [NM_001108385]                                        | 11,635 |
| 0            | Unknown                                                                                                                               | 11,635 |
| 0            | Uncharacterized protein [Source:UniProtKB/TrEMBL;Acc:D3ZV94] [ENSRNOT00000064107]                                                     | 11,634 |
| Nudt16       | Rattus norvegicus nudix (nucleoside diphosphate linked moiety X)-type motif 16 (Nudt16), mRNA [NM_001127554]                          | 11,633 |
| Pcnx13       | Uncharacterized protein [Source:UniProtKB/TrEMBL;Acc:D3ZSQ1] [ENSRNOT00000064136]                                                     | 11,633 |
| RGD1562339   | Uncharacterized protein [Source:UniProtKB/TrEMBL;Acc:D4AC80] [ENSRNOT00000002408]                                                     | 11,631 |
| Cpg1         | Rattus norvegicus candidate plasticity gene 1 (Cpg1), mRNA [NM_178104]                                                                | 11,630 |
| 0            | Uncharacterized protein [Source:UniProtKB/TrEMBL;Acc:D3ZT95] [ENSRNOT00000004563]                                                     | 11,629 |
| LOC691920    | PREDICTED: Rattus norvegicus similar to kinesin-like motor protein C20orf23 (LOC691920), mRNA [XM_001080099]                          | 11,629 |

|            |                                                                                                                                                                            |        |
|------------|----------------------------------------------------------------------------------------------------------------------------------------------------------------------------|--------|
| Bre        | Rattus norvegicus brain and reproductive organ-expressed protein (Bre), mRNA [NM_199270]                                                                                   | 11,628 |
| Vezf1      | PREDICTED: Rattus norvegicus vascular endothelial zinc finger 1 (Vezf1), partial mRNA [XM_001081191]                                                                       | 11,626 |
| Fam120a    | Rattus norvegicus family with sequence similarity 120A (Fam120a), mRNA [NM_001191816]                                                                                      | 11,625 |
| Ing3       | Rattus norvegicus inhibitor of growth family, member 3 (Ing3), mRNA [NM_001034107]                                                                                         | 11,623 |
| 0          | Unknown                                                                                                                                                                    | 11,622 |
| 0          | Unknown                                                                                                                                                                    | 11,622 |
| Dctn5      | Rattus norvegicus dynactin 5 (Dctn5), mRNA [NM_001037778]                                                                                                                  | 11,622 |
| 0          | Uncharacterized protein [Source:UniProtKB/TrEMBL;Acc:D4A105] [ENSRNOT00000026728]                                                                                          | 11,620 |
| Pcp2       | Rattus norvegicus Purkinje cell protein 2 (Pcp2), mRNA [NM_001107116]                                                                                                      | 11,619 |
| Gpr68      | Rattus norvegicus G protein-coupled receptor 68 (Gpr68), mRNA [NM_001108049]                                                                                               | 11,618 |
| 0          | P53 PG-III protein [Source:UniProtKB/TrEMBL;Acc:Q6I9N3] [ENSRNOT00000049514]                                                                                               | 11,616 |
| Znf521     | zinc finger protein 521 [Source:RefSeq peptide;Acc:NP_001100873] [ENSRNOT00000022637]                                                                                      | 11,616 |
| Ptgdr1     | Rattus norvegicus prostaglandin D receptor-like (Ptgdr1), mRNA [NM_022241]                                                                                                 | 11,615 |
| Rhox2      | Rattus norvegicus reproductive homeobox on X chromosome 2 (Rhox2), mRNA [NM_001025746]                                                                                     | 11,615 |
| 0          | Unknown                                                                                                                                                                    | 11,614 |
| Klk11      | Rattus norvegicus kallikrein related-peptidase 11 (Klk11), mRNA [NM_001106252]                                                                                             | 11,612 |
| Ccdc94     | Rattus norvegicus coiled-coil domain containing 94 (Ccdc94), mRNA [NM_001109673]                                                                                           | 11,610 |
| LOC689996  | Uncharacterized protein [Source:UniProtKB/TrEMBL;Acc:D3Z801] [ENSRNOT00000058976]                                                                                          | 11,610 |
| Il6r       | Rattus norvegicus interleukin 6 receptor (Il6r), mRNA [NM_017020]                                                                                                          | 11,609 |
| 0          | Unknown                                                                                                                                                                    | 11,608 |
| LOC502876  | PREDICTED: Rattus norvegicus similar to protein phosphatase 1, regulatory subunit 15B (LOC502876), miscRNA [XR_086238]                                                     | 11,608 |
| Ttf1       | Similar to RNA polymerase I transcription termination factor 1 (Predicted), isoform CRA_bUncharacterized protein [Source:UniProtKB/TrEMBL;Acc:D4A1Z7] [ENSRNOT00000061029] | 11,607 |
| Pdzrn3     | PREDICTED: Rattus norvegicus PDZ domain containing RING finger 3 (Pdzrn3), mRNA [XM_232226]                                                                                | 11,607 |
| Zdhhc17    | Rattus norvegicus zinc finger, DHHC-type containing 17 (Zdhhc17), mRNA [NM_001039340]                                                                                      | 11,603 |
| 0          | Uncharacterized protein [Source:UniProtKB/TrEMBL;Acc:D3ZKV4] [ENSRNOT00000022344]                                                                                          | 11,603 |
| Olr1720    | Rattus norvegicus olfactory receptor 1720 (Olr1720), mRNA [NM_001001116]                                                                                                   | 11,602 |
| RGD1561916 | Uncharacterized protein [Source:UniProtKB/TrEMBL;Acc:D3ZGG6] [ENSRNOT00000017903]                                                                                          | 11,597 |
| Pqlc1      | Rattus norvegicus PQ loop repeat containing 1 (Pqlc1), mRNA [NM_001013189]                                                                                                 | 11,596 |
| 0          | Unknown                                                                                                                                                                    | 11,593 |
| Napg       | Rattus norvegicus N-ethylmaleimide-sensitive factor attachment protein, gamma (Napg), mRNA [NM_001107384]                                                                  | 11,592 |
| Arhgap23   | PREDICTED: Rattus norvegicus Rho GTPase activating protein 23 (Arhgap23), mRNA [XM_001081375]                                                                              | 11,590 |
| RGD1305254 | Uncharacterized protein [Source:UniProtKB/TrEMBL;Acc:D3ZWI0] [ENSRNOT00000036343]                                                                                          | 11,589 |
| LOC497978  | Rattus norvegicus similar to diacylglycerol kinase epsilon (LOC497978), mRNA [NM_001039341]                                                                                | 11,588 |

|            |                                                                                                                                                     |               |
|------------|-----------------------------------------------------------------------------------------------------------------------------------------------------|---------------|
| N4bp2l2    | Rattus norvegicus NEDD4 binding protein 2-like 2 (N4bp2l2), mRNA [NM_001005533]                                                                     | <b>11,587</b> |
| Cltc       | Rattus norvegicus clathrin, heavy chain (Hc) (Cltc), mRNA [NM_019299]                                                                               | <b>11,587</b> |
| 0          | Uncharacterized protein [Source:UniProtKB/TrEMBL;Acc:D3ZKR7] [ENSRNOT00000046075]                                                                   | <b>11,587</b> |
| Hdhd2      | Rattus norvegicus haloacid dehalogenase-like hydrolase domain containing 2 (Hdhd2), mRNA [NM_001014151]                                             | <b>11,585</b> |
| Psgb1      | Rattus norvegicus pregnancy-specific beta 1-glycoprotein (Psgb1), mRNA [NM_021677]                                                                  | <b>11,583</b> |
| Mzf1       | Rattus norvegicus myeloid zinc finger 1 (Mzf1), mRNA [NM_001108470]                                                                                 | <b>11,582</b> |
| Commd9     | Rattus norvegicus COMM domain containing 9 (Commd9), mRNA [NM_001033692]                                                                            | <b>11,582</b> |
| RGD1563070 | Rattus norvegicus similar to hypothetical protein (RGD1563070), mRNA [NM_001134541]                                                                 | <b>11,582</b> |
| 0          | Rattus norvegicus similar to glyceraldehyde-3-phosphate dehydrogenase (LOC305194), mRNA [XM_223212]                                                 | <b>11,581</b> |
| Cdkl3      | Rattus norvegicus cyclin-dependent kinase-like 3 (Cdkl3), transcript variant 2, mRNA [NM_021772]                                                    | <b>11,580</b> |
| Hrh3       | Rattus norvegicus histamine receptor H3 (Hrh3), mRNA [NM_053506]                                                                                    | <b>11,580</b> |
| LOC501089  | PREDICTED: Rattus norvegicus similar to Discs large homolog 5 (Placenta and prostate DLG) (Discs large protein P-dlg) (LOC501089), mRNA [XM_576504] | <b>11,579</b> |
| Gnaz       | Rattus norvegicus guanine nucleotide binding protein (G protein), alpha z polypeptide (Gnaz), mRNA [NM_013189]                                      | <b>11,576</b> |
| Vamp4      | Rattus norvegicus vesicle-associated membrane protein 4 (Vamp4), mRNA [NM_001108856]                                                                | <b>11,575</b> |
| Olr741     | Rattus norvegicus olfactory receptor 741 (Olr741), mRNA [NM_001000575]                                                                              | <b>11,575</b> |
| Yes1       | Rattus norvegicus Yamaguchi sarcoma viral (v-yes) oncogene homolog 1 (Yes1), mRNA [NM_033298]                                                       | <b>11,574</b> |
| 0          | Uncharacterized protein [Source:UniProtKB/TrEMBL;Acc:D3ZJU2] [ENSRNOT00000004966]                                                                   | <b>11,571</b> |
| Agt        | Rattus norvegicus angiotensinogen (serpin peptidase inhibitor, clade A, member 8) (Agt), mRNA [NM_134432]                                           | <b>11,570</b> |
| RGD1564224 | PREDICTED: Rattus norvegicus similar to hypothetical protein MGC18079 (RGD1564224), mRNA [XM_577106]                                                | <b>11,570</b> |
| RGD1306682 | Rattus norvegicus similar to RIKEN cDNA 1810046J19 (RGD1306682), mRNA [NM_001108296]                                                                | <b>11,569</b> |
| Rnf2       | Rattus norvegicus ring finger protein 2 (Rnf2), mRNA [NM_001025667]                                                                                 | <b>11,567</b> |
| 0          | Unknown                                                                                                                                             | <b>11,566</b> |
| RGD1306282 | PREDICTED: Rattus norvegicus similar to RIKEN cDNA 4432406C05 (RGD1306282), mRNA [XM_235171]                                                        | <b>11,565</b> |
| Nrip3      | Rattus norvegicus nuclear receptor interacting protein 3 (Nrip3), mRNA [NM_001108498]                                                               | <b>11,559</b> |
| Tmem218    | Rattus norvegicus transmembrane protein 218 (Tmem218), mRNA [NM_001008325]                                                                          | <b>11,556</b> |
| Numbl      | Rattus norvegicus numb homolog (Drosophila)-like (Numbl), mRNA [NM_001033888]                                                                       | <b>11,554</b> |
| 0          | Unknown                                                                                                                                             | <b>11,554</b> |
| 0          | BC012801 gamma tubulin ring complex protein (76p gene) {Homo sapiens} (exp=-1; wgp=0; cg=0), partial (7%) [TC627508]                                | <b>11,553</b> |
| Vsig8      | Rattus norvegicus V-set and immunoglobulin domain containing 8 (Vsig8), mRNA [NM_001105972]                                                         | <b>11,552</b> |
| 0          | Unknown                                                                                                                                             | <b>11,551</b> |
| Usp8       | Rattus norvegicus ubiquitin specific peptidase 8 (Usp8), mRNA [NM_001106502]                                                                        | <b>11,549</b> |
| RGD1310727 | Rattus norvegicus LOC363070 (RGD1310727), mRNA [NM_001108764]                                                                                       | <b>11,549</b> |
| Alpi       | Rattus norvegicus alkaline phosphatase, intestinal (Alpi), mRNA [NM_022665]                                                                         | <b>11,548</b> |

|            |                                                                                                                                     |        |
|------------|-------------------------------------------------------------------------------------------------------------------------------------|--------|
| 0          | Unknown                                                                                                                             | 11,547 |
| Rab9b      | Rattus norvegicus RAB9B, member RAS oncogene family (Rab9b), mRNA [NM_001109018]                                                    | 11,547 |
| 0          | Unknown                                                                                                                             | 11,545 |
| Phex       | Rattus norvegicus phosphate regulating endopeptidase homolog, X-linked (Phex), mRNA [NM_013004]                                     | 11,544 |
| Brcc3      | Rattus norvegicus BRCA1/BRCA2-containing complex, subunit 3 (Brcc3), mRNA [NM_001127300]                                            | 11,543 |
| Rundc1     | PREDICTED: Rattus norvegicus RUN domain containing 1 (Rundc1), mRNA [XM_001081465]                                                  | 11,541 |
| Olr1347    | Rattus norvegicus olfactory receptor 1347 (Olr1347), mRNA [NM_001001121]                                                            | 11,540 |
| Rpl10a     | Rattus norvegicus ribosomal protein L10A (Rpl10a), mRNA [NM_031065]                                                                 | 11,540 |
| Olr1439    | Rattus norvegicus olfactory receptor 1439 (Olr1439), mRNA [NM_001000016]                                                            | 11,539 |
| Txndc16    | Uncharacterized protein [Source:UniProtKB/TrEMBL;Acc:D3ZQK4] [ENSRNOT00000008372]                                                   | 11,538 |
| RGD1565752 | Uncharacterized protein [Source:UniProtKB/TrEMBL;Acc:D3ZE25] [ENSRNOT00000058376]                                                   | 11,535 |
| 0          | Unknown                                                                                                                             | 11,532 |
| 0          | Unknown                                                                                                                             | 11,530 |
| Bnc1       | Rattus norvegicus basonuclein 1 (Bnc1), mRNA [NM_001108916]                                                                         | 11,529 |
| RGD1308626 | Rattus norvegicus similar to 9630044O09Rik protein (RGD1308626), mRNA [NM_001014139]                                                | 11,529 |
| Zfp365     | Rattus norvegicus zinc finger protein 365 (Zfp365), mRNA [NM_001025145]                                                             | 11,528 |
| 0          | Rattus norvegicus similar to dJ1070B1.1 (similar to KIAA0316 and KIAA0967 proteins) (LOC315916), mRNA [XM_236515]                   | 11,528 |
| RGD1307365 | PREDICTED: Rattus norvegicus similar to KIAA1009 protein (RGD1307365), mRNA [XM_001054857]                                          | 11,525 |
| Cacna1b    | Rattus norvegicus calcium channel, voltage-dependent, N type, alpha 1B subunit (Cacna1b), transcript variant 1, mRNA [NM_001195199] | 11,523 |
| Plod3      | Rattus norvegicus procollagen-lysine, 2-oxoglutarate 5-dioxygenase 3 (Plod3), mRNA [NM_178101]                                      | 11,520 |
| Cnih       | Rattus norvegicus cornichon homolog (Drosophila) (Cnih), mRNA [NM_001106029]                                                        | 11,519 |
| Wnt9b      | Rattus norvegicus wingless-type MMTV integration site family, member 9B (Wnt9b), mRNA [NM_001107055]                                | 11,517 |
| Myl9       | Rattus norvegicus myosin, light chain 9, regulatory (Myl9), mRNA [NM_001100885]                                                     | 11,517 |
| Oaz2       | Rattus norvegicus ornithine decarboxylase antizyme 2 (Oaz2), mRNA [NM_001109899]                                                    | 11,517 |
| Rpl36a     | Rattus norvegicus ribosomal protein L36a (Rpl36a), mRNA [NM_001128065]                                                              | 11,512 |
| Ctrb1      | Rattus norvegicus chymotrypsinogen B1 (Ctrb1), mRNA [NM_012536]                                                                     | 11,511 |
| Dgcr2      | Rattus norvegicus DiGeorge syndrome critical region gene 2 (Dgcr2), mRNA [NM_001012146]                                             | 11,510 |
| Ppm1b      | Rattus norvegicus protein phosphatase 1B, magnesium dependent, beta isoform (Ppm1b), mRNA [NM_033096]                               | 11,509 |
| Rnase111   | Rattus norvegicus ribonuclease, RNase A family, 1-like 1 (pancreatic) (Rnase111), mRNA [NM_001013232]                               | 11,508 |
| Akap10     | Rattus norvegicus A kinase (PRKA) anchor protein 10 (Akap10), nuclear gene encoding mitochondrial protein, mRNA [NM_001114606]      | 11,508 |
| Rbmx2      | Rattus norvegicus RNA binding motif protein, X-linked 2 (Rbmx2), mRNA [NM_001113786]                                                | 11,507 |
| Atp11b     | Atp11b protein [Source:UniProtKB/TrEMBL;Acc:Q5RJS7] [ENSRNOT00000016961]                                                            | 11,506 |
| Epha4      | Rattus norvegicus Eph receptor A4 (Epha4), mRNA [NM_001162411]                                                                      | 11,504 |
| 0          | Unknown                                                                                                                             | 11,504 |



|              |                                                                                                                                                                                                          |               |
|--------------|----------------------------------------------------------------------------------------------------------------------------------------------------------------------------------------------------------|---------------|
| 0            | A disintegrin-like and metalloprotease (Reprolysin type) with thrombospondin type 1 motif, 6 (Predicted), isoform CRA_aUncharacterized protein [Source:UniProtKB/TrEMBL;Acc:D3ZZF9] [ENSRNOT00000035876] | <b>11,501</b> |
| RGD1309707   | Rattus norvegicus similar to RIKEN cDNA 4930431E10 (RGD1309707), mRNA [NM_001109598]                                                                                                                     | <b>11,501</b> |
| Tmem38b      | Rattus norvegicus transmembrane protein 38B (Tmem38b), mRNA [NM_001014191]                                                                                                                               | <b>11,500</b> |
| Purb         | Rattus norvegicus purine rich element binding protein B (Purb), mRNA [NM_001017503]                                                                                                                      | <b>11,499</b> |
| LOC100125385 | Rattus norvegicus hypothetical protein LOC100125385 (LOC100125385), mRNA [NM_001103364]                                                                                                                  | <b>11,498</b> |
| 0            | Unknown                                                                                                                                                                                                  | <b>11,496</b> |
| Mrpl35       | Rattus norvegicus mitochondrial ribosomal protein L35 (Mrpl35), nuclear gene encoding mitochondrial protein, mRNA [NM_001106596]                                                                         | <b>11,494</b> |
| H6pd         | Rattus norvegicus hexose-6-phosphate dehydrogenase (glucose 1-dehydrogenase) (H6pd), mRNA [NM_001106698]                                                                                                 | <b>11,493</b> |
| Apc2         | Rattus norvegicus adenomatosis polyposis coli 2 (Apc2), mRNA [NM_001106769]                                                                                                                              | <b>11,492</b> |
| Adra2a       | Rattus norvegicus adrenergic, alpha-2A-, receptor (Adra2a), mRNA [NM_012739]                                                                                                                             | <b>11,492</b> |
| Olr1459      | Rattus norvegicus olfactory receptor 1459 (Olr1459), mRNA [NM_001000770]                                                                                                                                 | <b>11,491</b> |
| 0            | Unknown                                                                                                                                                                                                  | <b>11,489</b> |
| Ascc2        | Rattus norvegicus activating signal cointegrator 1 complex subunit 2 (Ascc2), mRNA [NM_001109091]                                                                                                        | <b>11,486</b> |
| 0            | Rattus norvegicus similar to mKIAA1511 protein (LOC298457), mRNA [XM_233446]                                                                                                                             | <b>11,484</b> |
| Suv420h1     | Rattus norvegicus suppressor of variegation 4-20 homolog 1 (Drosophila) (Suv420h1), mRNA [NM_001108512]                                                                                                  | <b>11,483</b> |
| Rnf151       | Rattus norvegicus ring finger protein 151 (Rnf151), mRNA [NM_001106987]                                                                                                                                  | <b>11,483</b> |
| Acads        | Rattus norvegicus acyl-Coenzyme A dehydrogenase, C-2 to C-3 short chain (Acads), nuclear gene encoding mitochondrial protein, mRNA [NM_022512]                                                           | <b>11,482</b> |
| Dom3z        | Rattus norvegicus DOM-3 homolog Z (C. elegans) (Dom3z), mRNA [NM_212497]                                                                                                                                 | <b>11,481</b> |
| Ndufaf4      | Rattus norvegicus NADH dehydrogenase (ubiquinone) 1 alpha subcomplex, assembly factor 4 (Ndufaf4), nuclear gene encoding mitochondrial protein, mRNA [NM_198783]                                         | <b>11,481</b> |
| Dlat         | Rattus norvegicus dihydrolipoamide S-acetyltransferase (Dlat), nuclear gene encoding mitochondrial protein, mRNA [NM_031025]                                                                             | <b>11,478</b> |
| Doc2g        | Rattus norvegicus double C2, gamma (Doc2g), mRNA [NM_001011937]                                                                                                                                          | <b>11,477</b> |
| 0            | Unknown                                                                                                                                                                                                  | <b>11,476</b> |
| Cyp4v3       | Rattus norvegicus cytochrome P450, family 4, subfamily v, polypeptide 3 (Cyp4v3), mRNA [NM_001135600]                                                                                                    | <b>11,476</b> |
| 0            | Rattus norvegicus similar to glyceraldehyde-3-phosphate dehydrogenase (phosphorylating) (EC 1.2.1.12) - mouse (LOC293386), mRNA [XM_219208]                                                              | <b>11,475</b> |
| Tlcd1        | Rattus norvegicus TLC domain containing 1 (Tlcd1), mRNA [NM_001013858]                                                                                                                                   | <b>11,474</b> |
| Has1         | Rattus norvegicus hyaluronan synthase 1 (Has1), mRNA [NM_172323]                                                                                                                                         | <b>11,470</b> |
| ST7          | Rattus norvegicus suppression of tumorigenicity 7 (ST7), transcript variant 1, mRNA [NM_001004102]                                                                                                       | <b>11,467</b> |
| Tmtc4        | Rattus norvegicus transmembrane and tetratricopeptide repeat containing 4 (Tmtc4), mRNA [NM_001134414]                                                                                                   | <b>11,466</b> |
| Tstd2        | Rattus norvegicus thiosulfate sulfurtransferase (rhodanese)-like domain containing 2 (Tstd2), mRNA [NM_001108663]                                                                                        | <b>11,462</b> |
| Tmie         | Rattus norvegicus transmembrane inner ear (Tmie), mRNA [NM_001109299]                                                                                                                                    | <b>11,462</b> |

|           |                                                                                                                                                                 |        |
|-----------|-----------------------------------------------------------------------------------------------------------------------------------------------------------------|--------|
| Git2      | Rattus norvegicus G protein-coupled receptor kinase interacting ArfGAP 2 (Git2), mRNA [NM_001005553]                                                            | 11,462 |
| Olr337    | Rattus norvegicus olfactory receptor 337 (Olr337), mRNA [NM_001000507]                                                                                          | 11,462 |
| Fam55b    | Rattus norvegicus family with sequence similarity 55, member B (Fam55b), mRNA [NM_001025055]                                                                    | 11,460 |
| 0         | TOP1_RAT (Q9WUL0) DNA topoisomerase 1 (DNA topoisomerase I) , complete [TC575805]                                                                               | 11,459 |
| 0         | Rattus norvegicus similar to glyceraldehyde-3-phosphate dehydrogenase (phosphorylating) (EC 1.2.1.12) - mouse (LOC315007), mRNA [XM_235346]                     | 11,459 |
| 0         | PREDICTED: Rattus norvegicus similar to glyceraldehyde-3-phosphate dehydrogenase (RGD1565238), partial mRNA [XM_001081651]                                      | 11,455 |
| LOC687553 | PREDICTED: Rattus norvegicus similar to Forkhead box protein L1 (Forkhead-related protein FKHL11) (Transcription factor FKH-6) (LOC687553), mRNA [XM_001079078] | 11,453 |
| Lrp1      | Rattus norvegicus low density lipoprotein-related protein 1 (alpha-2-macroglobulin receptor) (Lrp1), mRNA [NM_001130490]                                        | 11,453 |
| Rps6ka5   | Rattus norvegicus ribosomal protein S6 kinase, polypeptide 5 (Rps6ka5), mRNA [NM_001108048]                                                                     | 11,452 |
| Syt6      | Rattus norvegicus synaptotagmin VI (Syt6), mRNA [NM_022191]                                                                                                     | 11,451 |
| LOC686921 | PREDICTED: Rattus norvegicus hypothetical protein LOC686921 (LOC686921), mRNA [XM_001076338]                                                                    | 11,451 |
| Rft1      | Rattus norvegicus RFT1 homolog (S. cerevisiae) (Rft1), mRNA [NM_001135866]                                                                                      | 11,451 |
| Sbsn      | Rattus norvegicus suprabasin (Sbsn), transcript variant 2, mRNA [NM_001044231]                                                                                  | 11,450 |
| Orc5l     | Rattus norvegicus origin recognition complex, subunit 5-like (yeast) (Orc5l), mRNA [NM_001014186]                                                               | 11,449 |
| Hk2       | Rattus norvegicus hexokinase 2 (Hk2), mRNA [NM_012735]                                                                                                          | 11,449 |
| Tcf20     | Rattus norvegicus transcription factor 20 (Tcf20), mRNA [NM_001130574]                                                                                          | 11,447 |
| Tmem169   | Rattus norvegicus transmembrane protein 169 (Tmem169), mRNA [NM_001109574]                                                                                      | 11,445 |
| Bnip3l    | Rattus norvegicus BCL2/adenovirus E1B interacting protein 3-like (Bnip3l), mRNA [NM_080888]                                                                     | 11,444 |
| Cdgap     | Rattus norvegicus Cdc42 GTPase-activating protein (Cdgap), mRNA [NM_001105879]                                                                                  | 11,444 |
| 0         | PREDICTED: Rattus norvegicus polymerase (DNA directed) nu (Poln), miscRNA [XR_085614]                                                                           | 11,443 |
| Igfbp1    | Rattus norvegicus insulin-like growth factor binding protein 1 (Igfbp1), mRNA [NM_013144]                                                                       | 11,441 |
| 0         | Unknown                                                                                                                                                         | 11,440 |
| Zfp410    | Rattus norvegicus zinc finger protein 410 (Zfp410), mRNA [NM_001108042]                                                                                         | 11,440 |
| Prkrip1   | Rattus norvegicus Prkr interacting protein 1 (IL11 inducible) (Prkrip1), mRNA [NM_001098793]                                                                    | 11,437 |
| 0         | Unknown                                                                                                                                                         | 11,435 |
| 0         | Unknown                                                                                                                                                         | 11,434 |
| Tle4      | Rattus norvegicus transducin-like enhancer of split 4 (E(sp1) homolog, Drosophila) (Tle4), mRNA [NM_019141]                                                     | 11,434 |
| Olr1519   | Rattus norvegicus olfactory receptor 1519 (Olr1519), mRNA [NM_001000037]                                                                                        | 11,433 |
| 0         | Rattus norvegicus unknown protein mRNA, partial cds. [U89745]                                                                                                   | 11,433 |
| Ptms      | Rattus norvegicus parathyrosin (Ptms), mRNA [NM_031975]                                                                                                         | 11,433 |
| Yap1      | Rattus norvegicus yes-associated protein 1 (Yap1), mRNA [NM_001034002]                                                                                          | 11,432 |
| 0         | Unknown                                                                                                                                                         | 11,432 |

|            |                                                                                                                                                                  |               |
|------------|------------------------------------------------------------------------------------------------------------------------------------------------------------------|---------------|
| 0          | Unknown                                                                                                                                                          | <b>11,431</b> |
| Rragc      | Rattus norvegicus Ras-related GTP binding C (Rragc), mRNA [NM_001048184]                                                                                         | <b>11,430</b> |
| 0          | Unknown                                                                                                                                                          | <b>11,428</b> |
| LOC689442  | PREDICTED: Rattus norvegicus hypothetical protein LOC689442 (LOC689442), mRNA [XM_001070806]                                                                     | <b>11,427</b> |
| Gfap       | Rattus norvegicus glial fibrillary acidic protein (Gfap), mRNA [NM_017009]                                                                                       | <b>11,421</b> |
| LOC681994  | PREDICTED: Rattus norvegicus similar to developmental endothelial locus-1 isoform b, transcript variant 3 (LOC681994), mRNA [XM_001057753]                       | <b>11,420</b> |
| 0          | Unknown                                                                                                                                                          | <b>11,419</b> |
| Arhgef3    | Rattus norvegicus Rho guanine nucleotide exchange factor (GEF) 3 (Arhgef3), mRNA [NM_001106061]                                                                  | <b>11,418</b> |
| Leng8      | Rattus norvegicus leukocyte receptor cluster (LRC) member 8 (Leng8), mRNA [NM_001037790]                                                                         | <b>11,415</b> |
| Rftn1      | Rattus norvegicus raftlin lipid raft linker 1 (Rftn1), mRNA [NM_001135011]                                                                                       | <b>11,415</b> |
| RGD1305704 | PREDICTED: Rattus norvegicus similar to c-Mpl binding protein (RGD1305704), miscRNA [XR_006033]                                                                  | <b>11,415</b> |
| LOC500077  | Rattus norvegicus similar to RIKEN cDNA 3110062M04 (LOC500077), mRNA [NM_001024325]                                                                              | <b>11,414</b> |
| Pfkfb3     | Rattus norvegicus 6-phosphofructo-2-kinase/fructose-2,6-biphosphatase 3 (Pfkfb3), mRNA [NM_057135]                                                               | <b>11,411</b> |
| Gabra5     | Rattus norvegicus gamma-aminobutyric acid (GABA) A receptor, alpha 5 (Gabra5), mRNA [NM_017295]                                                                  | <b>11,411</b> |
| Apc2       | Rattus norvegicus adenomatosis polyposis coli 2 (Apc2), mRNA [NM_001106769]                                                                                      | <b>11,407</b> |
| LOC690402  | Rattus norvegicus similar to Short palate, lung and nasal epithelium carcinoma-associated protein 3 homolog precursor (LOC690402), mRNA [NM_001109588]           | <b>11,407</b> |
| Sdhc       | Rattus norvegicus succinate dehydrogenase complex, subunit C, integral membrane protein (Sdhc), nuclear gene encoding mitochondrial protein, mRNA [NM_001005534] | <b>11,403</b> |
| St3gal5    | Rattus norvegicus ST3 beta-galactoside alpha-2,3-sialyltransferase 5 (St3gal5), mRNA [NM_031337]                                                                 | <b>11,401</b> |
| 0          | Rattus norvegicus similar to glyceraldehyde-3-phosphate dehydrogenase (LOC311121), mRNA [XM_230014]                                                              | <b>11,400</b> |
| 0          | Rattus norvegicus TL0ADA6YC10 mRNA sequence. [FQ228611]                                                                                                          | <b>11,399</b> |
| Prkci      | Rattus norvegicus protein kinase C, iota (Prkci), mRNA [NM_032059]                                                                                               | <b>11,399</b> |
| Trerf1     | Rattus norvegicus transcriptional regulating factor 1 (Trerf1), mRNA [NM_001108199]                                                                              | <b>11,398</b> |
| Tmem51     | Rattus norvegicus transmembrane protein 51 (Tmem51), mRNA [NM_001109273]                                                                                         | <b>11,398</b> |
| Cytsa      | Rattus norvegicus cytospin A (Cytsa), mRNA [NM_001039455]                                                                                                        | <b>11,396</b> |
| Epha3      | Rattus norvegicus Eph receptor A3 (Epha3), mRNA [NM_031564]                                                                                                      | <b>11,395</b> |
| Ppp1r1b    | Rattus norvegicus protein phosphatase 1, regulatory (inhibitor) subunit 1B (Ppp1r1b), mRNA [NM_138521]                                                           | <b>11,395</b> |
| Olr1248    | Rattus norvegicus olfactory receptor 1248 (Olr1248), mRNA [NM_001000452]                                                                                         | <b>11,395</b> |
| LOC690096  | PREDICTED: Rattus norvegicus similar to ribosomal protein L28 (LOC690096), mRNA [XM_001073240]                                                                   | <b>11,395</b> |
| RGD1307830 | Uncharacterized protein [Source:UniProtKB/TrEMBL;Acc:D3ZN01] [ENSRNOT00000059984]                                                                                | <b>11,393</b> |
| Gpr176     | Probable G-protein coupled receptor 176 [Source:UniProtKB/Swiss-Prot;Acc:Q64017] [ENSRNOT00000007882]                                                            | <b>11,392</b> |
| Syt13      | Rattus norvegicus synaptotagmin XIII (Syt13), mRNA [NM_030839]                                                                                                   | <b>11,391</b> |
| Mrps36     | Rattus norvegicus mitochondrial ribosomal protein S36 (Mrps36), nuclear gene encoding mitochondrial protein, mRNA [NM_001191605]                                 | <b>11,389</b> |

|            |                                                                                                                                             |        |
|------------|---------------------------------------------------------------------------------------------------------------------------------------------|--------|
| Phkb       | Rattus norvegicus phosphorylase kinase, beta (Phkb), mRNA [NM_001014152]                                                                    | 11,389 |
| Pcdhb18    | PREDICTED: Rattus norvegicus protocadherin beta 18 (Pcdhb18), mRNA [XM_001055991]                                                           | 11,389 |
| Tcte4      | Rattus norvegicus t-complex-associated testis expressed 4 (Tcte4), mRNA [NM_001166303]                                                      | 11,388 |
| Olr132     | Rattus norvegicus olfactory receptor 132 (Olr132), mRNA [NM_001001273]                                                                      | 11,388 |
| 0          | DNA-binding protein A [Source:UniProtKB/Swiss-Prot;Acc:Q62764] [ENSRNOT00000007347]                                                         | 11,385 |
| RGD1559979 | PREDICTED: Rattus norvegicus similar to APH1B homolog (C.elegans) (RGD1559979), mRNA [XM_001081687]                                         | 11,384 |
| Ghdc       | Rattus norvegicus GH3 domain containing (Ghdc), mRNA [NM_001191651]                                                                         | 11,384 |
| 0          | Unknown                                                                                                                                     | 11,382 |
| Nhlrc3     | Uncharacterized protein [Source:UniProtKB/TrEMBL;Acc:D4A2F6] [ENSRNOT00000014562]                                                           | 11,382 |
| Tmed7      | Rattus norvegicus transmembrane emp24 protein transport domain containing 7 (Tmed7), mRNA [NM_001105758]                                    | 11,381 |
| Akr1a1     | Rattus norvegicus aldo-keto reductase family 1, member A1 (aldehyde reductase) (Akr1a1), mRNA [NM_031000]                                   | 11,381 |
| Nos3       | Rattus norvegicus nitric oxide synthase 3, endothelial cell (Nos3), mRNA [NM_021838]                                                        | 11,378 |
| Blzf1      | Rattus norvegicus basic leucine zipper nuclear factor 1 (Blzf1), mRNA [NM_001017494]                                                        | 11,378 |
| Bbs1       | Rattus norvegicus Bardet-Biedl syndrome 1 (Bbs1), mRNA [NM_001107569]                                                                       | 11,376 |
| 0          | Unknown                                                                                                                                     | 11,375 |
| Slc19a2    | Rattus norvegicus solute carrier family 19 (thiamine transporter), member 2 (Slc19a2), mRNA [NM_001030024]                                  | 11,374 |
| Zdhhc24    | Rattus norvegicus zinc finger, DHHC-type containing 24 (Zdhhc24), mRNA [NM_001039100]                                                       | 11,374 |
| Gk5        | Uncharacterized protein [Source:UniProtKB/TrEMBL;Acc:D3ZN47] [ENSRNOT00000067835]                                                           | 11,374 |
| RGD1564419 | Rattus norvegicus similar to hypothetical gene supported by BC025338 (RGD1564419), mRNA [NM_001109234]                                      | 11,373 |
| Pdgfb      | Rattus norvegicus platelet-derived growth factor beta polypeptide (simian sarcoma viral (v-sis) oncogene homolog) (Pdgfb), mRNA [NM_031524] | 11,373 |
| Rbp1       | Rattus norvegicus retinol binding protein 1, cellular (Rbp1), mRNA [NM_012733]                                                              | 11,367 |
| 0          | BC052076 expressed sequence AW050020 {Mus musculus} (exp=-1; wgp=0; cg=0), partial (32%) [TC589792]                                         | 11,366 |
| Osbp1a     | Rattus norvegicus oxysterol binding protein-like 1A (Osbp1a), mRNA [NM_172023]                                                              | 11,365 |
| Zg16       | Rattus norvegicus zymogen granule protein 16 (Zg16), mRNA [NM_134409]                                                                       | 11,365 |
| Rps19bp1   | Rattus norvegicus ribosomal protein S19 binding protein 1 (Rps19bp1), mRNA [NM_001130578]                                                   | 11,365 |
| Osbp16     | Rattus norvegicus oxysterol binding protein-like 6 (Osbp16), mRNA [NM_001107735]                                                            | 11,364 |
| Eif4h      | Rattus norvegicus eukaryotic translation initiation factor 4H (Eif4h), mRNA [NM_001006957]                                                  | 11,364 |
| Ptbp2      | Rattus norvegicus polypyrimidine tract binding protein 2 (Ptbp2), mRNA [NM_001005555]                                                       | 11,361 |
| Atp4b      | Rattus norvegicus ATPase, H <sup>+</sup> /K <sup>+</sup> exchanging, beta polypeptide (Atp4b), mRNA [NM_012510]                             | 11,361 |
| Olr1401    | Rattus norvegicus olfactory receptor 1401 (Olr1401), mRNA [NM_001000003]                                                                    | 11,359 |
| Rexo4      | Rattus norvegicus REX4, RNA exonuclease 4 homolog (S. cerevisiae) (Rexo4), mRNA [NM_001033884]                                              | 11,357 |
| Slc25a28   | Rattus norvegicus solute carrier family 25, member 28 (Slc25a28), mRNA [NM_001109515]                                                       | 11,352 |
| RGD621352  | Rattus norvegicus similar to RIKEN cDNA 1500031L02 (RGD621352), mRNA [NM_138865]                                                            | 11,351 |
| Eml1       | Rattus norvegicus echinoderm microtubule associated protein like 1 (Eml1), mRNA [NM_001025741]                                              | 11,349 |

|            |                                                                                                                                                                                                                   |        |
|------------|-------------------------------------------------------------------------------------------------------------------------------------------------------------------------------------------------------------------|--------|
| 0          | Unknown                                                                                                                                                                                                           | 11,347 |
| Adam22     | PREDICTED: Rattus norvegicus a disintegrin and metalloprotease domain (ADAM) 22 (Adam22), mRNA [XM_002726324]                                                                                                     | 11,346 |
| Nop56      | Rattus norvegicus NOP56 ribonucleoprotein homolog (yeast) (Nop56), mRNA [NM_001025732]                                                                                                                            | 11,346 |
| Ager       | Rattus norvegicus advanced glycosylation end product-specific receptor (Ager), mRNA [NM_053336]                                                                                                                   | 11,346 |
| RGD1309730 | Rattus norvegicus similar to RIKEN cDNA B230118H07 (RGD1309730), mRNA [NM_001106491]                                                                                                                              | 11,345 |
| Olr425     | Rattus norvegicus olfactory receptor 425 (Olr425), mRNA [NM_001000393]                                                                                                                                            | 11,342 |
| Olr1280    | Rattus norvegicus olfactory receptor 1280 (Olr1280), mRNA [NM_001000517]                                                                                                                                          | 11,342 |
| Cspg5      | Rattus norvegicus chondroitin sulfate proteoglycan 5 (Cspg5), transcript variant 1, mRNA [NM_019284]                                                                                                              | 11,340 |
| Prnp       | Rattus norvegicus prion protein (Prnp), mRNA [NM_012631]                                                                                                                                                          | 11,337 |
| Neo1       | PREDICTED: Rattus norvegicus neogenin homolog 1 (chicken) (Neo1), mRNA [XM_001074913]                                                                                                                             | 11,336 |
| Vash1      | Uncharacterized protein [Source:UniProtKB/TrEMBL;Acc:D4AE85] [ENSRNOT00000014017]                                                                                                                                 | 11,331 |
| Scgb1c1    | Rattus norvegicus secretoglobin, family 1C, member 1 (Scgb1c1), mRNA [NM_001107561]                                                                                                                               | 11,325 |
| Dsel       | RCG24512Uncharacterized protein [Source:UniProtKB/TrEMBL;Acc:D3ZYE3] [ENSRNOT00000043890]                                                                                                                         | 11,325 |
| 0          | Unknown                                                                                                                                                                                                           | 11,323 |
| Sptbn1     | Rattus norvegicus spectrin, beta, non-erythrocytic 1 (Sptbn1), mRNA [NM_001013130]                                                                                                                                | 11,322 |
| 0          | Rattus norvegicus similar to KIAA0856 protein (LOC315676), mRNA [XM_236249]                                                                                                                                       | 11,322 |
| Hbg1       | Rattus norvegicus hemoglobin, gamma A (Hbg1), mRNA [NM_172093]                                                                                                                                                    | 11,322 |
| Gna11      | Rattus norvegicus guanine nucleotide binding protein, alpha 11 (Gna11), mRNA [NM_031033]                                                                                                                          | 11,321 |
| 0          | Q3UKK2_MOUSE (Q3UKK2) 15 days pregnant adult female placenta cDNA, RIKEN full-length enriched library, clone:I530020K06 product:pregnancy-specific glycoprotein 30, full insert sequence, partial (9%) [TC612990] | 11,321 |
| 0          | Tudor domain-containing protein PHF20L1 [Source:UniProtKB/Swiss-Prot;Acc:Q4V9H5] [ENSRNOT00000007564]                                                                                                             | 11,320 |
| Xpc        | Rattus norvegicus xeroderma pigmentosum, complementation group C (Xpc), mRNA [NM_001107874]                                                                                                                       | 11,320 |
| She        | PREDICTED: Rattus norvegicus Src homology 2 domain containing E (She), mRNA [XM_001062249]                                                                                                                        | 11,320 |
| Scyl3      | Rattus norvegicus SCY1-like 3 (S. cerevisiae) (Scyl3), mRNA [NM_001191828]                                                                                                                                        | 11,320 |
| Dnajb4     | Rattus norvegicus DnaJ (Hsp40) homolog, subfamily B, member 4 (Dnajb4), mRNA [NM_001013076]                                                                                                                       | 11,319 |
| Rps26      | Rattus norvegicus ribosomal protein S26 (Rps26), mRNA [NM_013224]                                                                                                                                                 | 11,317 |
| 0          | Unknown                                                                                                                                                                                                           | 11,317 |
| Pnrc2      | Rattus norvegicus proline-rich nuclear receptor coactivator 2 (Pnrc2), mRNA [NM_001103360]                                                                                                                        | 11,317 |
| 0          | Rattus norvegicus similar to glyceraldehyde-3-phosphate dehydrogenase (phosphorylating) (EC 1.2.1.12) - mouse (LOC301496), mRNA [XM_237274]                                                                       | 11,315 |
| Rpl15      | Rattus norvegicus ribosomal protein L15 (Rpl15), mRNA [NM_139114]                                                                                                                                                 | 11,315 |
| Diaph2     | PREDICTED: Rattus norvegicus diaphanous homolog 2 (Drosophila) (Diaph2), mRNA [XM_001066898]                                                                                                                      | 11,312 |
| Heatr6     | Rattus norvegicus HEAT repeat containing 6 (Heatr6), mRNA [NM_001079897]                                                                                                                                          | 11,312 |
| 0          | Unknown                                                                                                                                                                                                           | 11,311 |

|            |                                                                                                                      |        |
|------------|----------------------------------------------------------------------------------------------------------------------|--------|
| Kcnh8      | Rattus norvegicus potassium voltage-gated channel, subfamily H (eag-related), member 8 (Kcnh8), mRNA [NM_145095]     | 11,310 |
| 0          | Unknown                                                                                                              | 11,309 |
| 0          | AI407942 EST236232 Normalized rat ovary, Bento Soares Rattus sp. cDNA clone ROVEE68 3' end, mRNA sequence [AI407942] | 11,308 |
| 0          | Unknown                                                                                                              | 11,308 |
| LOC690415  | Rattus norvegicus hypothetical protein LOC690415 (LOC690415), mRNA [NM_001109590]                                    | 11,308 |
| RGD1559731 | Uncharacterized protein [Source:UniProtKB/TrEMBL;Acc:D3ZCG1] [ENSRNOT00000005659]                                    | 11,308 |
| Wdr13      | Rattus norvegicus WD repeat domain 13 (Wdr13), mRNA [NM_001108247]                                                   | 11,308 |
| Bet1l      | Rattus norvegicus blocked early in transport 1 homolog (S. cerevisiae) like (Bet1l), mRNA [NM_019368]                | 11,307 |
| Cyth2      | Rattus norvegicus cytohesin 2 (Cyth2), mRNA [NM_053911]                                                              | 11,305 |
| RGD1310899 | Rattus norvegicus similar to CGI-35 protein (RGD1310899), mRNA [NM_001044235]                                        | 11,305 |
| 0          | Uncharacterized protein [Source:UniProtKB/TrEMBL;Acc:D3ZL75] [ENSRNOT00000022583]                                    | 11,304 |
| 0          | Unknown                                                                                                              | 11,303 |
| 0          | Uncharacterized protein [Source:UniProtKB/TrEMBL;Acc:D3ZD60] [ENSRNOT00000038336]                                    | 11,303 |
| 0          | Uncharacterized protein [Source:UniProtKB/TrEMBL;Acc:D3ZXZ9] [ENSRNOT00000020215]                                    | 11,302 |
| 0          | Unknown                                                                                                              | 11,302 |
| Klhl14     | Rattus norvegicus kelch-like 14 (Drosophila) (Klhl14), mRNA [NM_001108885]                                           | 11,302 |
| Pmm2       | Rattus norvegicus phosphomannomutase 2 (Pmm2), mRNA [NM_001106973]                                                   | 11,301 |
| Tmem115    | Rattus norvegicus transmembrane protein 115 (Tmem115), mRNA [NM_001108779]                                           | 11,301 |
| Tnfsf8     | PREDICTED: Rattus norvegicus tumor necrosis factor (ligand) superfamily, member 8 (Tnfsf8), mRNA [XM_001064723]      | 11,301 |
| Btbd6      | Rattus norvegicus BTB (POZ) domain containing 6 (Btbd6), mRNA [NM_001077683]                                         | 11,301 |
| Me1        | Rattus norvegicus malic enzyme 1, NADP(+)-dependent, cytosolic (Me1), mRNA [NM_012600]                               | 11,301 |
| Alkbh4     | Rattus norvegicus alkB, alkylation repair homolog 4 (E. coli) (Alkbh4), mRNA [NM_001105920]                          | 11,301 |
| Rasal2     | Rattus norvegicus RAS protein activator like 2 (Rasal2), mRNA [NM_001107188]                                         | 11,298 |
| 0          | Uncharacterized protein [Source:UniProtKB/TrEMBL;Acc:D4ACN9] [ENSRNOT00000037120]                                    | 11,298 |
| Ttyh2      | PREDICTED: Rattus norvegicus tweety homolog 2 (Drosophila) (Ttyh2), mRNA [XM_001081641]                              | 11,297 |
| Mttr2      | Rattus norvegicus myotubularin related protein 2 (Mttr2), mRNA [NM_001108123]                                        | 11,297 |
| RGD1309808 | Rattus norvegicus similar to apolipoprotein L2; apolipoprotein L-II (RGD1309808), mRNA [NM_001134801]                | 11,296 |
| Crkrs      | Rattus norvegicus Cdc2-related kinase, arginine/serine-rich (Crkrs), transcript variant 2, mRNA [NM_138916]          | 11,295 |
| Fgfr2      | Rattus norvegicus fibroblast growth factor receptor 2 (Fgfr2), transcript variant a, mRNA [NM_012712]                | 11,294 |
| Kdsr       | Rattus norvegicus 3-ketodihydrosphingosine reductase (Kdsr), mRNA [NM_001108342]                                     | 11,294 |
| Eif5a2     | Rattus norvegicus eukaryotic translation initiation factor 5A2 (Eif5a2), mRNA [NM_001100697]                         | 11,294 |
| Egr3       | Rattus norvegicus early growth response 3 (Egr3), mRNA [NM_017086]                                                   | 11,292 |
| Bles03     | Rattus norvegicus basophilic leukemia expressed protein BLES03 (Bles03), transcript variant 1, mRNA [NM_001024233]   | 11,292 |
| Marveld1   | Rattus norvegicus MARVEL domain containing 1 (Marveld1), mRNA [NM_001107590]                                         | 11,291 |

|              |                                                                                                                                                                |        |
|--------------|----------------------------------------------------------------------------------------------------------------------------------------------------------------|--------|
| Rcor2        | Rattus norvegicus REST corepressor 2 (Rcor2), mRNA [NM_001013994]                                                                                              | 11,290 |
| Mtmr12       | Rattus norvegicus myotubularin related protein 12 (Mtmr12), mRNA [NM_001012077]                                                                                | 11,287 |
| RGD1309492   | Rattus norvegicus similar to mKIAA1737 protein (RGD1309492), mRNA [NM_001108044]                                                                               | 11,287 |
| St13         | Rattus norvegicus suppression of tumorigenicity 13 (St13), mRNA [NM_031122]                                                                                    | 11,287 |
| Matn2        | PREDICTED: Rattus norvegicus matrilin 2 (Matn2), mRNA [XM_216941]                                                                                              | 11,285 |
| LOC100360737 | PREDICTED: Rattus norvegicus rCG54380-like (LOC100360737), mRNA [XM_002725537]                                                                                 | 11,282 |
| 0            | Unknown                                                                                                                                                        | 11,282 |
| 0            | Unknown                                                                                                                                                        | 11,282 |
| 0            | Unknown                                                                                                                                                        | 11,282 |
| Stat1        | Rattus norvegicus signal transducer and activator of transcription 1 (Stat1), transcript variant alpha, mRNA [NM_032612]                                       | 11,281 |
| Vamp7        | Rattus norvegicus vesicle-associated membrane protein 7 (Vamp7), mRNA [NM_053531]                                                                              | 11,278 |
| Gtf3c4       | Rattus norvegicus general transcription factor IIIc, polypeptide 4 (Gtf3c4), mRNA [NM_001109473]                                                               | 11,277 |
| Bgn          | Rattus norvegicus biglycan (Bgn), mRNA [NM_017087]                                                                                                             | 11,277 |
| Ndufv3       | Rattus norvegicus NADH dehydrogenase (ubiquinone) flavoprotein 3 (Ndufv3), nuclear gene encoding mitochondrial protein, transcript variant 1, mRNA [NM_022607] | 11,274 |
| Strc         | Uncharacterized protein [Source:UniProtKB/TrEMBL;Acc:D3ZUE8] [ENSRNOT00000020130]                                                                              | 11,274 |
| Tcfap2d      | Rattus norvegicus transcription factor AP-2, delta (Tcfap2d), mRNA [NM_001106895]                                                                              | 11,272 |
| RGD1309139   | Rattus norvegicus similar to CG5435-PA (RGD1309139), mRNA [NM_001134578]                                                                                       | 11,269 |
| Coq4         | Rattus norvegicus coenzyme Q4 homolog (S. cerevisiae) (Coq4), nuclear gene encoding mitochondrial protein, mRNA [NM_001031662]                                 | 11,265 |
| RGD1311892   | Rattus norvegicus similar to hypothetical protein FLJ10901 (RGD1311892), mRNA [NM_001134502]                                                                   | 11,264 |
| Dnhd1        | PREDICTED: Rattus norvegicus dynein heavy chain domain 1 (Dnhd1), miscRNA [XR_085725]                                                                          | 11,259 |
| 0            | Unknown                                                                                                                                                        | 11,259 |
| Gbp5         | Rattus norvegicus guanylate binding protein 5 (Gbp5), mRNA [NM_001108569]                                                                                      | 11,257 |
| Set          | Rattus norvegicus SET nuclear oncogene (Set), mRNA [NM_001012504]                                                                                              | 11,256 |
| RGD1306000   | Rattus norvegicus similar to CG8043-PA (RGD1306000), mRNA [NM_001108827]                                                                                       | 11,255 |
| 0            | Unknown                                                                                                                                                        | 11,251 |
| LOC688459    | Rattus norvegicus hypothetical protein LOC688459 (LOC688459), mRNA [NM_001109502]                                                                              | 11,250 |
| 0            | Unknown                                                                                                                                                        | 11,249 |
| Itpr2        | Rattus norvegicus inositol 1,4,5-triphosphate receptor, type 2 (Itpr2), mRNA [NM_031046]                                                                       | 11,248 |
| Ppapdc3      | Rattus norvegicus phosphatidic acid phosphatase type 2 domain containing 3 (Ppapdc3), mRNA [NM_001012349]                                                      | 11,247 |
| 0            | Unknown                                                                                                                                                        | 11,247 |
| Khyn         | PREDICTED: Rattus norvegicus similar to mKIAA0323 protein (RGD1565688), miscRNA [XR_085623]                                                                    | 11,246 |
| Olr1309      | Rattus norvegicus olfactory receptor 1309 (Olr1309), mRNA [NM_001000466]                                                                                       | 11,245 |
| Lrrc4        | Rattus norvegicus leucine rich repeat containing 4 (Lrrc4), mRNA [NM_001037336]                                                                                | 11,244 |

|            |                                                                                                                                        |        |
|------------|----------------------------------------------------------------------------------------------------------------------------------------|--------|
| Etv6       | Rattus norvegicus ets variant 6 (Etv6), mRNA [NM_001037353]                                                                            | 11,244 |
| 0          | Q6C5E2_YARLI (Q6C5E2) Similarity (Fragment), partial (11%) [TC594916]                                                                  | 11,241 |
| Snrk       | Rattus norvegicus SNF related kinase (Snrk), mRNA [NM_138833]                                                                          | 11,240 |
| Tpra1      | Transmembrane protein adipocyte-associated 1 [Source:UniProtKB/Swiss-Prot;Acc:Q791F6] [ENSRNOT00000022534]                             | 11,240 |
| Gzf1       | Rattus norvegicus GDNF-inducible zinc finger protein 1 (Gzf1), mRNA [NM_001107788]                                                     | 11,238 |
| 0          | Unknown                                                                                                                                | 11,237 |
| Phldb2     | PREDICTED: Rattus norvegicus pleckstrin homology-like domain, family B, member 2 (Phldb2), mRNA [XM_001064525]                         | 11,237 |
| Uba6       | Rattus norvegicus ubiquitin-like modifier activating enzyme 6 (Uba6), mRNA [NM_001107213]                                              | 11,236 |
| 0          | Unknown                                                                                                                                | 11,236 |
| Prr19      | Rattus norvegicus proline rich 19 (Prr19), mRNA [NM_001173428]                                                                         | 11,236 |
| Flot1      | Rattus norvegicus flotillin 1 (Flot1), mRNA [NM_022701]                                                                                | 11,233 |
| Ppp1cb     | Rattus norvegicus protein phosphatase 1, catalytic subunit, beta isoform (Ppp1cb), mRNA [NM_013065]                                    | 11,233 |
| Gstk1      | Rattus norvegicus glutathione S-transferase kappa 1 (Gstk1), nuclear gene encoding mitochondrial protein, mRNA [NM_181371]             | 11,231 |
| Senp1      | PREDICTED: Rattus norvegicus Sumo1/sentrin/SMT3 specific peptidase 1 (Senp1), mRNA [XM_001060796]                                      | 11,230 |
| RGD1307537 | Rattus norvegicus similar to RIKEN cDNA 4933417A18 (RGD1307537), mRNA [NM_001013885]                                                   | 11,230 |
| Sema3g     | Rattus norvegicus sema domain, immunoglobulin domain (Ig), short basic domain, secreted, (semaphorin) 3G (Sema3g), mRNA [NM_001100882] | 11,228 |
| 0          | Q2H348_CHAGB (Q2H348) Predicted protein, partial (5%) [TC596046]                                                                       | 11,227 |
| Cdk5rap2   | Rattus norvegicus CDK5 regulatory subunit associated protein 2 (Cdk5rap2), mRNA [NM_173134]                                            | 11,227 |
| Ociad1     | Rattus norvegicus OCIA domain containing 1 (Ociad1), mRNA [NM_001013874]                                                               | 11,226 |
| Ankrd13a   | Rattus norvegicus ankyrin repeat domain 13a (Ankrd13a), mRNA [NM_001012148]                                                            | 11,223 |
| 0          | Unknown                                                                                                                                | 11,222 |
| LOC688173  | PREDICTED: Rattus norvegicus similar to Telethonin (Titin cap protein) (LOC688173), mRNA [XM_001081394]                                | 11,222 |
| 0          | Unknown                                                                                                                                | 11,221 |
| LOC298138  | PREDICTED: Rattus norvegicus similar to RAS and EF hand domain containing (LOC298138), miscRNA [XR_006670]                             | 11,219 |
| Baz2b      | Rattus norvegicus bromodomain adjacent to zinc finger domain, 2B (Baz2b), mRNA [NM_001108260]                                          | 11,217 |
| Fnbp1l     | Rattus norvegicus formin binding protein 1-like (Fnbp1l), mRNA [NM_001039609]                                                          | 11,211 |
| Irx1       | Rattus norvegicus iroquois homeobox 1 (Irx1), mRNA [NM_001107331]                                                                      | 11,209 |
| Tmem39b    | Rattus norvegicus transmembrane protein 39b (Tmem39b), mRNA [NM_001014192]                                                             | 11,206 |
| 0          | Uncharacterized protein [Source:UniProtKB/TrEMBL;Acc:D3ZQI7] [ENSRNOT00000043346]                                                      | 11,206 |
| Eef1e1     | Rattus norvegicus eukaryotic translation elongation factor 1 epsilon 1 (Eef1e1), mRNA [NM_001106106]                                   | 11,200 |
| LOC686428  | PREDICTED: Rattus norvegicus similar to Emu2 (LOC686428), mRNA [XM_001069996]                                                          | 11,199 |
| 0          | Uncharacterized protein [Source:UniProtKB/TrEMBL;Acc:D4A119] [ENSRNOT00000066634]                                                      | 11,199 |
| Josd1      | Rattus norvegicus Josephin domain containing 1 (Josd1), mRNA [NM_001025009]                                                            | 11,195 |
| Tial1      | Rattus norvegicus Tia1 cytotoxic granule-associated RNA binding protein-like 1 (Tial1), mRNA [NM_001013193]                            | 11,194 |



|              |                                                                                                                                                             |        |
|--------------|-------------------------------------------------------------------------------------------------------------------------------------------------------------|--------|
| Poldip3      | Rattus norvegicus polymerase (DNA-directed), delta interacting protein 3 (Poldip3), mRNA [NM_001130506]                                                     | 11,194 |
| Prg2         | Rattus norvegicus proteoglycan 2, bone marrow (Prg2), mRNA [NM_031619]                                                                                      | 11,192 |
| Slc24a2      | Rattus norvegicus solute carrier family 24 (sodium/potassium/calcium exchanger), member 2 (Slc24a2), mRNA [NM_031743]                                       | 11,192 |
| Wdr19        | Rattus norvegicus WD repeat domain 19 (Wdr19), mRNA [NM_001191679]                                                                                          | 11,188 |
| Cdh10        | Rattus norvegicus cadherin 10 (Cdh10), mRNA [NM_001168631]                                                                                                  | 11,188 |
| Coq9         | Rattus norvegicus coenzyme Q9 homolog (S. cerevisiae) (Coq9), nuclear gene encoding mitochondrial protein, mRNA [NM_001035257]                              | 11,188 |
| Slc9a5       | Rattus norvegicus solute carrier family 9 (sodium/hydrogen exchanger), member 5 (Slc9a5), mRNA [NM_138858]                                                  | 11,187 |
| LOC689207    | PREDICTED: Rattus norvegicus similar to proteoglycan 4 (LOC689207), mRNA [XM_001069975]                                                                     | 11,187 |
| Ip6k1        | Rattus norvegicus inositol hexakisphosphate kinase 1 (Ip6k1), mRNA [NM_053316]                                                                              | 11,185 |
| Rgs17        | Rattus norvegicus regulator of G-protein signaling 17 (Rgs17), mRNA [NM_001107459]                                                                          | 11,184 |
| Zfp395       | Rattus norvegicus zinc finger protein 395 (Zfp395), mRNA [NM_001107271]                                                                                     | 11,184 |
| LOC501375    | PREDICTED: Rattus norvegicus similar to glutamate receptor, ionotropic, N-methyl D-aspartate-like 1A (LOC501375), mRNA [XM_576788]                          | 11,183 |
| Usp10        | Rattus norvegicus ubiquitin specific peptidase 10 (Usp10), mRNA [NM_001034146]                                                                              | 11,183 |
| LOC100364957 | PREDICTED: Rattus norvegicus RGD1560755 protein-like (LOC100364957), mRNA [XM_002725203]                                                                    | 11,183 |
| 0            | Unknown                                                                                                                                                     | 11,181 |
| 0            | Rattus norvegicus TL0AEA54YG18 mRNA sequence. [FQ225308]                                                                                                    | 11,181 |
| 0            | Putative uncharacterized proteinUncharacterized protein [Source:UniProtKB/TrEMBL;Acc:D4A5B2] [ENSRNOT00000004034]                                           | 11,181 |
| 0            | Unknown                                                                                                                                                     | 11,176 |
| 0            | Unknown                                                                                                                                                     | 11,171 |
| 0            | Unknown                                                                                                                                                     | 11,167 |
| Tmem33       | Rattus norvegicus transmembrane protein 33 (Tmem33), transcript variant 1, mRNA [NM_021671]                                                                 | 11,167 |
| 0            | Clasp1 protein [Source:UniProtKB/TrEMBL;Acc:Q5M928] [ENSRNOT000000061516]                                                                                   | 11,167 |
| Ak7          | Rattus norvegicus adenylate kinase 7 (Ak7), mRNA [NM_001108055]                                                                                             | 11,167 |
| Ttc19        | Rattus norvegicus tetratricopeptide repeat domain 19 (Ttc19), mRNA [NM_001109644]                                                                           | 11,163 |
| Ccdc142      | Uncharacterized protein [Source:UniProtKB/TrEMBL;Acc:D3ZV00] [ENSRNOT000000035329]                                                                          | 11,162 |
| Mgat4b       | Rattus norvegicus mannosyl (alpha-1,3-)-glycoprotein beta-1,4-N-acetylglucosaminyltransferase, isozyme B (Mgat4b), mRNA [NM_001127533]                      | 11,160 |
| Ube2i        | Rattus norvegicus ubiquitin-conjugating enzyme E2I (UBC9 homolog, yeast) (Ube2i), mRNA [NM_013050]                                                          | 11,158 |
| Prmt6        | Rattus norvegicus protein arginine methyltransferase 6 (Prmt6), mRNA [NM_001106466]                                                                         | 11,157 |
| LOC678704    | Rattus norvegicus similar to Probable cation-transporting ATPase 3 (ATPase family homolog up-regulated in senescence cells 1) (LOC360728), mRNA [XM_341001] | 11,157 |
| Pax8         | Rattus norvegicus paired box 8 (Pax8), mRNA [NM_031141]                                                                                                     | 11,157 |
| Nid67        | Rattus norvegicus putative small membrane protein NID67 (Nid67), mRNA [NM_173126]                                                                           | 11,156 |
| Abhd13       | Rattus norvegicus abhydrolase domain containing 13 (Abhd13), mRNA [NM_001107327]                                                                            | 11,155 |
| Dok3         | Rattus norvegicus docking protein 3 (Dok3), mRNA [NM_001107336]                                                                                             | 11,154 |

|            |                                                                                                                                                 |        |
|------------|-------------------------------------------------------------------------------------------------------------------------------------------------|--------|
| Pak2       | Rattus norvegicus p21 protein (Cdc42/Rac)-activated kinase 2 (Pak2), mRNA [NM_053306]                                                           | 11,152 |
| Pcdha3     | Rattus norvegicus protocadherin alpha 3 (Pcdha3), mRNA [NM_053941]                                                                              | 11,152 |
| St5        | Rattus norvegicus suppression of tumorigenicity 5 (St5), mRNA [NM_001107547]                                                                    | 11,152 |
| Olr1144    | Rattus norvegicus olfactory receptor 1144 (Olr1144), mRNA [NM_001000876]                                                                        | 11,152 |
| 0          | Unknown                                                                                                                                         | 11,151 |
| Mmp1a      | Rattus norvegicus matrix metalloproteinase 1a (interstitial collagenase) (Mmp1a), mRNA [NM_001134530]                                           | 11,149 |
| 0          | Unknown                                                                                                                                         | 11,146 |
| Dffb       | Rattus norvegicus DNA fragmentation factor, beta polypeptide (caspase-activated DNase) (Dffb), mRNA [NM_053362]                                 | 11,146 |
| 0          | Unknown                                                                                                                                         | 11,144 |
| Ppargc1a   | Rattus norvegicus peroxisome proliferator-activated receptor gamma, coactivator 1 alpha (Ppargc1a), mRNA [NM_031347]                            | 11,144 |
| Zbtb8os    | PREDICTED: Rattus norvegicus zinc finger and BTB domain containing 8 opposite strand (Zbtb8os), miscRNA [XR_086264]                             | 11,144 |
| Nat13      | Rattus norvegicus N-acetyltransferase 13 (Nat13), mRNA [NM_001105881]                                                                           | 11,143 |
| 0          | Unknown                                                                                                                                         | 11,142 |
| Ppp6c      | Rattus norvegicus protein phosphatase 6, catalytic subunit (Ppp6c), mRNA [NM_133589]                                                            | 11,141 |
| RGD1563302 | Rattus norvegicus RGD1563302 (RGD1563302), mRNA [NM_001162899]                                                                                  | 11,137 |
| Alg8       | Rattus norvegicus asparagine-linked glycosylation 8, alpha-1,3-glucosyltransferase homolog (S. cerevisiae) (Alg8), mRNA [NM_001034127]          | 11,136 |
| 0          | Unknown                                                                                                                                         | 11,134 |
| Insc       | Rattus norvegicus inscuteable homolog (Drosophila) (Insc), mRNA [NM_001106285]                                                                  | 11,133 |
| Mllt10     | Rattus norvegicus myeloid/lymphoid or mixed-lineage leukemia (trithorax homolog, Drosophila); translocated to, 10 (Mllt10), mRNA [NM_001012162] | 11,133 |
| Rsb1       | Rattus norvegicus round spermatid basic protein 1 (Rsb1), mRNA [NM_001191710]                                                                   | 11,132 |
| Olr789     | Rattus norvegicus olfactory receptor 789 (Olr789), mRNA [NM_001000377]                                                                          | 11,130 |
| Chn1       | Rattus norvegicus chimerin (chimaerin) 1 (Chn1), mRNA [NM_032083]                                                                               | 11,129 |
| Rnase13    | Rattus norvegicus ribonuclease, RNase A family, 13 (non-active) (Rnase13), mRNA [NM_001012231]                                                  | 11,127 |
| Fancl      | Rattus norvegicus Fanconi anemia, complementation group L (Fancl), mRNA [NM_001191684]                                                          | 11,124 |
| Hps1       | Rattus norvegicus Hermansky-Pudlak syndrome 1 homolog (human) (Hps1), mRNA [NM_040669]                                                          | 11,122 |
| Zfp26      | Rattus norvegicus zinc finger protein 26 (Zfp26), mRNA [NM_001108995]                                                                           | 11,122 |
| Dll3       | Rattus norvegicus delta-like 3 (Drosophila) (Dll3), mRNA [NM_053666]                                                                            | 11,121 |
| 37500      | Rattus norvegicus septin 2 (Sept2), mRNA [NM_057148]                                                                                            | 11,121 |
| Mllt4      | Rattus norvegicus myeloid/lymphoid or mixed-lineage leukemia (trithorax homolog, Drosophila); translocated to, 4 (Mllt4), mRNA [NM_013217]      | 11,120 |
| Gtf2h3     | Rattus norvegicus general transcription factor IIH, polypeptide 3 (Gtf2h3), mRNA [NM_001024236]                                                 | 11,119 |
| 0          | Transcription factor E2F5 [Source:UniProtKB/Swiss-Prot;Acc:Q62814] [ENSRNOT00000014361]                                                         | 11,117 |
| 0          | Exportin 7, isoform CRA_a Uncharacterized protein [Source:UniProtKB/TrEMBL;Acc:D3ZBB4] [ENSRNOT00000018440]                                     | 11,114 |
| Araf       | Rattus norvegicus v-raf murine sarcoma 3611 viral oncogene homolog (Araf), transcript variant 1, mRNA [NM_022532]                               | 11,114 |

|              |                                                                                                               |        |
|--------------|---------------------------------------------------------------------------------------------------------------|--------|
| Calm3        | Rattus norvegicus calmodulin 3 (Calm3), mRNA [NM_012518]                                                      | 11,113 |
| 0            | Uncharacterized protein [Source:UniProtKB/TrEMBL;Acc:D3ZBI5] [ENSRNOT00000042103]                             | 11,113 |
| 0            | Unknown                                                                                                       | 11,111 |
| Olr92        | Rattus norvegicus olfactory receptor 92 (Olr92), mRNA [NM_001000140]                                          | 11,111 |
| Kcnk16       | Rattus norvegicus potassium channel, subfamily K, member 16 (Kcnk16), mRNA [NM_001109520]                     | 11,111 |
| Cenpv        | Uncharacterized protein [Source:UniProtKB/TrEMBL;Acc:D4A9A3] [ENSRNOT00000004127]                             | 11,109 |
| Epha4        | Rattus norvegicus Eph receptor A4 (Epha4), mRNA [NM_001162411]                                                | 11,108 |
| St8sia1      | Rattus norvegicus ST8 alpha-N-acetyl-neuraminide alpha-2,8-sialyltransferase 1 (St8sia1), mRNA [NM_012813]    | 11,107 |
| LOC100365635 | PREDICTED: Rattus norvegicus ankyrin repeat domain 49-like (LOC100365635), miscRNA [XR_085597]                | 11,105 |
| 0            | Putative uncharacterized protein vp130S [Source:UniProtKB/TrEMBL;Acc:Q810D7] [ENSRNOT00000037528]             | 11,104 |
| Rnf183       | Uncharacterized protein [Source:UniProtKB/TrEMBL;Acc:D4A718] [ENSRNOT00000019924]                             | 11,103 |
| Arhgap20     | Rattus norvegicus Rho GTPase activating protein 20 (Arhgap20), mRNA [NM_213629]                               | 11,101 |
| LOC303448    | Rattus norvegicus similar to glyceraldehyde-3-phosphate dehydrogenase (LOC303448), mRNA [NM_001037190]        | 11,099 |
| Tmem37       | Rattus norvegicus transmembrane protein 37 (Tmem37), mRNA [NM_139095]                                         | 11,098 |
| 0            | Unknown                                                                                                       | 11,097 |
| Smad1        | Rattus norvegicus SMAD family member 1 (Smad1), mRNA [NM_013130]                                              | 11,096 |
| Cd44         | Rattus norvegicus Cd44 molecule (Cd44), mRNA [NM_012924]                                                      | 11,094 |
| 0            | Histone H2B-3 [Source:UniProtKB/TrEMBL;Acc:Q9Z2Q9] [ENSRNOT00000042005]                                       | 11,094 |
| LOC100361049 | LRRGT00168 [Source:UniProtKB/TrEMBL;Acc:Q6QI40] [ENSRNOT00000044735]                                          | 11,092 |
| Med29        | Rattus norvegicus mediator complex subunit 29 (Med29), mRNA [NM_001106237]                                    | 11,092 |
| Sumo1        | Rattus norvegicus SMT3 suppressor of mif two 3 homolog 1 (S. cerevisiae) (Sumo1), mRNA [NM_001009672]         | 11,091 |
| 0            | Uncharacterized protein [Source:UniProtKB/TrEMBL;Acc:D3ZEL6] [ENSRNOT00000045639]                             | 11,090 |
| Tollip       | Rattus norvegicus toll interacting protein (Tollip), mRNA [NM_001109668]                                      | 11,090 |
| RGD1307615   | Rattus norvegicus similar to hypothetical protein FLJ13045 (RGD1307615), mRNA [NM_001108573]                  | 11,089 |
| E2f7         | Rattus norvegicus E2F transcription factor 7 (E2f7), mRNA [NM_001108092]                                      | 11,089 |
| 0            | Unknown                                                                                                       | 11,089 |
| 0            | Unknown                                                                                                       | 11,087 |
| 0            | Unknown                                                                                                       | 11,086 |
| Pitx1        | Rattus norvegicus paired-like homeodomain 1 (Pitx1), mRNA [NM_053624]                                         | 11,086 |
| Pcdh7        | Rattus norvegicus protocadherin 7 (Pcdh7), mRNA [NM_001004087]                                                | 11,084 |
| Kcnd2        | Rattus norvegicus potassium voltage-gated channel, Shal-related subfamily, member 2 (Kcnd2), mRNA [NM_031730] | 11,084 |
| Mansc1       | Rattus norvegicus MANSC domain containing 1 (Mansc1), mRNA [NM_001109603]                                     | 11,083 |
| Nat15        | Rattus norvegicus N-acetyltransferase 15 (GCN5-related, putative) (Nat15), mRNA [NM_001014226]                | 11,083 |
| Stx12        | Rattus norvegicus syntaxin 12 (Stx12), mRNA [NM_022939]                                                       | 11,081 |

|              |                                                                                                                                                           |               |
|--------------|-----------------------------------------------------------------------------------------------------------------------------------------------------------|---------------|
| Acsf2        | Rattus norvegicus acyl-CoA synthetase family member 2 (Acsf2), mRNA [NM_001034951]                                                                        | <b>11,079</b> |
| 0            | similar to RIKEN cDNA 1700081O22 (LOC363337), mRNA [Source:RefSeq DNA;Acc:NM_001014221] [ENSRNOT00000041051]                                              | <b>11,079</b> |
| RGD1308759   | Rattus norvegicus similar to KIAA0892 protein (RGD1308759), mRNA [NM_001106077]                                                                           | <b>11,078</b> |
| Chodl        | Rattus norvegicus chondrolectin (Chodl), mRNA [NM_001105894]                                                                                              | <b>11,077</b> |
| 0            | Unknown                                                                                                                                                   | <b>11,074</b> |
| Rfc1         | Rattus norvegicus replication factor C (activator 1) 1 (Rfc1), mRNA [NM_053547]                                                                           | <b>11,071</b> |
| Ccnyl1       | PREDICTED: Rattus norvegicus cyclin Y-like 1 (Ccnyl1), mRNA [XM_237211]                                                                                   | <b>11,068</b> |
| Doxl1        | Rattus norvegicus diamine oxidase-like protein 1 (Doxl1), mRNA [NM_199233]                                                                                | <b>11,065</b> |
| Bmp3         | Rattus norvegicus bone morphogenetic protein 3 (Bmp3), mRNA [NM_017105]                                                                                   | <b>11,064</b> |
| 0            | Unknown                                                                                                                                                   | <b>11,062</b> |
| Toag1        | Rattus norvegicus tolerance-associated gene 1 (Toag1), mRNA [NM_001110838]                                                                                | <b>11,062</b> |
| LOC100361389 | PREDICTED: Rattus norvegicus hypothetical protein LOC100361389 (LOC100361389), mRNA [XM_002727821]                                                        | <b>11,058</b> |
| 0            | MMU18644 methyltransferase-like protein 1 {Mus musculus} (exp=-1; wgp=0; cg=0), partial (30%) [TC638589]                                                  | <b>11,058</b> |
| Mrpl10       | Rattus norvegicus mitochondrial ribosomal protein L10 (Mrpl10), nuclear gene encoding mitochondrial protein, mRNA [NM_001109620]                          | <b>11,055</b> |
| 0            | Unknown                                                                                                                                                   | <b>11,055</b> |
| Ppfia2       | Rattus norvegicus protein tyrosine phosphatase, receptor type, f polypeptide (PTPRF), interacting protein (liprin), alpha 2 (Ppfia2), mRNA [NM_001108745] | <b>11,055</b> |
| LOC688090    | Rattus norvegicus similar to RT1 class II histocompatibility antigen, B-1 beta chain precursor (RT1.B-beta(1)) (LOC688090), mRNA [NM_001101017]           | <b>11,049</b> |
| Gucy1a2      | Rattus norvegicus guanylate cyclase 1, soluble, alpha 2 (Gucy1a2), mRNA [NM_023956]                                                                       | <b>11,049</b> |
| Vegfa        | Rattus norvegicus vascular endothelial growth factor A (Vegfa), transcript variant 3, mRNA [NM_001110334]                                                 | <b>11,048</b> |
| 0            | Unknown                                                                                                                                                   | <b>11,047</b> |
| 0            | Unknown                                                                                                                                                   | <b>11,047</b> |
| Olr325       | Rattus norvegicus olfactory receptor 325 (Olr325), mRNA [NM_001000247]                                                                                    | <b>11,045</b> |
| 0            | Unknown                                                                                                                                                   | <b>11,044</b> |
| Slc7a12      | Rattus norvegicus solute carrier family 7 (cationic amino acid transporter, y+ system), member 12 (Slc7a12), mRNA [NM_001011948]                          | <b>11,040</b> |
| Tmem49       | Rattus norvegicus transmembrane protein 49 (Tmem49), mRNA [NM_138839]                                                                                     | <b>11,039</b> |
| 0            | CCD13_HUMAN (Q8IYE1) Coiled-coil domain-containing protein 13, partial (11%) [TC590118]                                                                   | <b>11,038</b> |
| Nat12        | Rattus norvegicus N-acetyltransferase 12 (GCN5-related, putative) (Nat12), mRNA [NM_001109099]                                                            | <b>11,038</b> |
| Olr1605      | Rattus norvegicus olfactory receptor 1605 (Olr1605), mRNA [NM_001000088]                                                                                  | <b>11,035</b> |
| 0            | Glyceraldehyde-3-phosphate dehydrogenase [Source:UniProtKB/TrEMBL;Acc:D3ZKR3] [ENSRNOT00000008094]                                                        | <b>11,034</b> |
| 0            | Unknown                                                                                                                                                   | <b>11,032</b> |
| RGD1561766   | PREDICTED: Rattus norvegicus similar to basic transcription factor 3 (RGD1561766), miscRNA [XR_009374]                                                    | <b>11,030</b> |
| Mgat1        | Rattus norvegicus mannosyl (alpha-1,3-)-glycoprotein beta-1,2-N-acetylglucosaminyltransferase (Mgat1), mRNA [NM_030861]                                   | <b>11,029</b> |

|              |                                                                                                                                 |        |
|--------------|---------------------------------------------------------------------------------------------------------------------------------|--------|
| Senp8        | Rattus norvegicus SUMO/sentrin specific peptidase family member 8 (Senp8), mRNA [NM_001012355]                                  | 11,027 |
| P4hb         | Rattus norvegicus prolyl 4-hydroxylase, beta polypeptide (P4hb), mRNA [NM_012998]                                               | 11,026 |
| 0            | Unknown                                                                                                                         | 11,025 |
| Abl1         | Rattus norvegicus c-abl oncogene 1, receptor tyrosine kinase (Abl1), mRNA [NM_001100850]                                        | 11,024 |
| Mier3        | Rattus norvegicus mesoderm induction early response 1, family member 3 (Mier3), mRNA [NM_001168000]                             | 11,023 |
| Derl3        | Rattus norvegicus Der1-like domain family, member 3 (Derl3), mRNA [NM_001109577]                                                | 11,023 |
| Gpr112l      | PREDICTED: Rattus norvegicus G protein-coupled receptor 112 like (Gpr112l), mRNA [XM_001058470]                                 | 11,022 |
| Ube3a        | Rattus norvegicus ubiquitin protein ligase E3A (Ube3a), mRNA [NM_001191837]                                                     | 11,022 |
| Cbfa2t2      | Rattus norvegicus core-binding factor, runt domain, alpha subunit 2; translocated to, 2 (Cbfa2t2), mRNA [NM_001168542]          | 11,017 |
| Galr3        | Rattus norvegicus galanin receptor 3 (Galr3), mRNA [NM_019173]                                                                  | 11,016 |
| Sycn         | Rattus norvegicus syncollin (Sycn), mRNA [NM_139086]                                                                            | 11,015 |
| Nanp         | Rattus norvegicus N-acetylneuraminic acid phosphatase (Nanp), mRNA [NM_001009409]                                               | 11,015 |
| Tpst1        | Rattus norvegicus tyrosylprotein sulfotransferase 1 (Tpst1), mRNA [NM_001011903]                                                | 11,014 |
| LOC100363969 | PREDICTED: Rattus norvegicus zinc finger protein 457-like (LOC100363969), miscRNA [XR_085746]                                   | 11,014 |
| B4galt5      | Rattus norvegicus UDP-Gal:betaGlcNAc beta 1,4-galactosyltransferase, polypeptide 5 (B4galt5), mRNA [NM_001108608]               | 11,014 |
| Xkr4         | Rattus norvegicus XK, Kell blood group complex subunit-related family, member 4 (Xkr4), mRNA [NM_001011971]                     | 11,014 |
| Rps6ka3      | Rattus norvegicus ribosomal protein S6 kinase polypeptide 3 (Rps6ka3), mRNA [NM_001192004]                                      | 11,014 |
| LOC683923    | PREDICTED: Rattus norvegicus hypothetical protein LOC683923 (LOC683923), mRNA [XM_001068075]                                    | 11,011 |
| Sphkap       | Rattus norvegicus SPHK1 interactor, AKAP domain containing (Sphkap), mRNA [NM_001127492]                                        | 11,010 |
| Pelp1        | Rattus norvegicus proline, glutamate and leucine rich protein 1 (Pelp1), mRNA [NM_001024270]                                    | 11,010 |
| Ttl          | Rattus norvegicus tubulin tyrosine ligase (Ttl), mRNA [NM_138536]                                                               | 11,010 |
| Dixdc1       | Rattus norvegicus DIX domain containing 1 (Dixdc1), mRNA [NM_001037654]                                                         | 11,010 |
| 0            | Unknown                                                                                                                         | 11,009 |
| 0            | Uncharacterized protein [Source:UniProtKB/TrEMBL;Acc:D3ZD32] [ENSRNOT00000067364]                                               | 11,009 |
| LOC687118    | PREDICTED: Rattus norvegicus similar to death effector domain-containing DNA binding protein 2 (LOC687118), mRNA [XM_001077155] | 11,002 |
| 0            | Unknown                                                                                                                         | 11,002 |
| Pcnx         | Rattus norvegicus pecanex homolog (Drosophila) (Pcnx), mRNA [NM_001170347]                                                      | 10,998 |
| Zfp828       | Rattus norvegicus zinc finger protein 828 (Zfp828), mRNA [NM_001107329]                                                         | 10,996 |
| Artn         | Rattus norvegicus artemin (Artn), mRNA [NM_053397]                                                                              | 10,995 |
| Cacna1i      | Rattus norvegicus calcium channel, voltage-dependent, T type, alpha 1i subunit (Cacna1i), mRNA [NM_020084]                      | 10,995 |
| Fance        | Rattus norvegicus Fanconi anemia, complementation group E (Fance), mRNA [NM_001191718]                                          | 10,993 |
| 0            | Unknown                                                                                                                         | 10,990 |
| Dppa3        | Rattus norvegicus developmental pluripotency-associated 3 (Dppa3), mRNA [NM_001047864]                                          | 10,990 |

|           |                                                                                                                                                            |        |
|-----------|------------------------------------------------------------------------------------------------------------------------------------------------------------|--------|
| Coq5      | Rattus norvegicus coenzyme Q5 homolog, methyltransferase ( <i>S. cerevisiae</i> ) (Coq5), nuclear gene encoding mitochondrial protein, mRNA [NM_001039022] | 10,988 |
| 0         | Unknown                                                                                                                                                    | 10,987 |
| Usp32     | Rattus norvegicus ubiquitin specific peptidase 32 (Usp32), mRNA [NM_001107032]                                                                             | 10,985 |
| Dmrta2    | Rattus norvegicus DMRT-like family A2 (Dmrta2), mRNA [NM_001107951]                                                                                        | 10,983 |
| 0         | Unknown                                                                                                                                                    | 10,983 |
| Fbxo25    | Rattus norvegicus F-box protein 25 (Fbxo25), mRNA [NM_001014239]                                                                                           | 10,982 |
| 0         | Unknown                                                                                                                                                    | 10,981 |
| Sfrs2ip   | Uncharacterized protein [Source:UniProtKB/TrEMBL;Acc:D4ABH1] [ENSRNOT00000007003]                                                                          | 10,981 |
| Mapk8ip3  | Rattus norvegicus mitogen-activated protein kinase 8 interacting protein 3 (Mapk8ip3), mRNA [NM_001100673]                                                 | 10,980 |
| Map3k1    | Rattus norvegicus mitogen activated protein kinase kinase kinase 1 (Map3k1), mRNA [NM_053887]                                                              | 10,979 |
| 0         | Rattus norvegicus cDNA clone IMAGE:7323401. [BC088301]                                                                                                     | 10,978 |
| Atp6v1c1  | Rattus norvegicus ATPase, H <sup>+</sup> transporting, lysosomal V1 subunit C1 (Atp6v1c1), mRNA [NM_001011992]                                             | 10,975 |
| Cox8a     | Rattus norvegicus cytochrome c oxidase subunit VIIIa (Cox8a), mRNA [NM_134345]                                                                             | 10,975 |
| Slc16a13  | Rattus norvegicus solute carrier family 16, member 13 (monocarboxylic acid transporter 13) (Slc16a13), mRNA [NM_001005530]                                 | 10,974 |
| Nrbp2     | Rattus norvegicus nuclear receptor binding protein 2 (Nrbp2), mRNA [NM_001135007]                                                                          | 10,974 |
| 0         | AT rich interactive domain 1B (SWI-like) Gene [Source:MGI Symbol;Acc:MGI:1926129] [ENSRNOT00000022939]                                                     | 10,969 |
| Dmwd      | PREDICTED: Rattus norvegicus dystrophia myotonica, WD repeat containing (Dmwd), mRNA [XM_002725588]                                                        | 10,968 |
| 0         | ubiquitin protein ligase E3 component n-recognin 2 [Source:RefSeq peptide;Acc:NP_001171542] [ENSRNOT00000061531]                                           | 10,967 |
| 0         | Unknown                                                                                                                                                    | 10,966 |
| Ttll12    | Rattus norvegicus tubulin tyrosine ligase-like family, member 12 (Ttll12), mRNA [NM_001135922]                                                             | 10,965 |
| 0         | Unknown                                                                                                                                                    | 10,964 |
| Gpkow     | Rattus norvegicus G patch domain and KOW motifs (Gpkow), mRNA [NM_001109381]                                                                               | 10,962 |
| Ankk1     | Rattus norvegicus ankyrin repeat and kinase domain containing 1 (Ankk1), mRNA [NM_001108999]                                                               | 10,961 |
| Eif2ak2   | Rattus norvegicus eukaryotic translation initiation factor 2-alpha kinase 2 (Eif2ak2), mRNA [NM_019335]                                                    | 10,961 |
| 0         | Unknown                                                                                                                                                    | 10,960 |
| Slc34a1   | Rattus norvegicus solute carrier family 34 (sodium phosphate), member 1 (Slc34a1), mRNA [NM_013030]                                                        | 10,960 |
| Gorab     | Rattus norvegicus golgin, RAB6-interacting (Gorab), mRNA [NM_001100563]                                                                                    | 10,956 |
| Sh3bp5    | Rattus norvegicus SH3-domain binding protein 5 (BTK-associated) (Sh3bp5), mRNA [NM_054011]                                                                 | 10,956 |
| LOC681989 | Rattus norvegicus similar to defective SPERmatogenesis family member (spe-39) (LOC681989), mRNA [NM_001101004]                                             | 10,956 |
| Bok       | Rattus norvegicus BCL2-related ovarian killer (Bok), mRNA [NM_017312]                                                                                      | 10,955 |
| 0         | Unknown                                                                                                                                                    | 10,953 |
| Cbl       | PREDICTED: Rattus norvegicus Cas-Br-M (murine) ecotropic retroviral transforming sequence, transcript variant 1 (Cbl), mRNA [XM_001066453]                 | 10,952 |
| Nnat      | Rattus norvegicus neuronatin (Nnat), transcript variant 1, mRNA [NM_053601]                                                                                | 10,951 |

|            |                                                                                                                                                                |        |
|------------|----------------------------------------------------------------------------------------------------------------------------------------------------------------|--------|
| 0          | Unknown                                                                                                                                                        | 10,948 |
| 0          | Unknown                                                                                                                                                        | 10,946 |
| 0          | Unknown                                                                                                                                                        | 10,945 |
| 0          | Unknown                                                                                                                                                        | 10,945 |
| Dtd1       | Rattus norvegicus D-tyrosyl-tRNA deacylase 1 homolog ( <i>S. cerevisiae</i> ) (Dtd1), nuclear gene encoding mitochondrial protein, mRNA [NM_001108594]         | 10,944 |
| Pfdn1      | Rattus norvegicus prefoldin subunit 1 (Pfdn1), mRNA [NM_001108427]                                                                                             | 10,944 |
| 0          | Unknown                                                                                                                                                        | 10,943 |
| Mtpn       | Rattus norvegicus myotrophin (Mtpn), mRNA [NM_024374]                                                                                                          | 10,943 |
| Timm17b    | Rattus norvegicus translocase of inner mitochondrial membrane 17 homolog B (yeast) (Timm17b), nuclear gene encoding mitochondrial protein, mRNA [NM_001108249] | 10,940 |
| Tm4sf4     | Rattus norvegicus transmembrane 4 L six family member 4 (Tm4sf4), mRNA [NM_053785]                                                                             | 10,940 |
| RGD1309708 | Rattus norvegicus similar to RIKEN cDNA 4930455F23 (RGD1309708), mRNA [NM_001014131]                                                                           | 10,938 |
| 0          | Glyceraldehyde-3-phosphate dehydrogenase [Source:UniProtKB/TrEMBL;Acc:D3ZDX2] [ENSRNOT00000051605]                                                             | 10,937 |
| Rab5a      | Rattus norvegicus RAB5A, member RAS oncogene family (Rab5a), mRNA [NM_022692]                                                                                  | 10,935 |
| Coro7      | Rattus norvegicus coronin 7 (Coro7), mRNA [NM_001191639]                                                                                                       | 10,933 |
| Prr7       | Rattus norvegicus proline rich 7 (synaptic) (Prr7), mRNA [NM_001109116]                                                                                        | 10,930 |
| Snph       | Rattus norvegicus syntaphilin (Snph), mRNA [NM_001106525]                                                                                                      | 10,930 |
| Gsdmd      | Rattus norvegicus gasdermin D (Gsdmd), mRNA [NM_001130553]                                                                                                     | 10,928 |
| 0          | Unknown                                                                                                                                                        | 10,925 |
| Ufl1       | Rattus norvegicus E3 UFM1-protein ligase 1 (Ufl1), mRNA [NM_001126279]                                                                                         | 10,924 |
| Asb3       | Rattus norvegicus ankyrin repeat and SOCS box-containing 3 (Asb3), mRNA [NM_001108864]                                                                         | 10,921 |
| 0          | Unknown                                                                                                                                                        | 10,919 |
| Pknox1     | Rattus norvegicus PBX/knotted 1 homeobox 1 (Pknox1), mRNA [NM_001013074]                                                                                       | 10,916 |
| Pthlh      | Rattus norvegicus parathyroid hormone-like hormone (Pthlh), mRNA [NM_012636]                                                                                   | 10,915 |
| 0          | Unknown                                                                                                                                                        | 10,915 |
| Map7       | Rattus norvegicus microtubule-associated protein 7 (Map7), transcript variant 2, mRNA [NM_001198638]                                                           | 10,915 |
| 0          | Uncharacterized protein [Source:UniProtKB/TrEMBL;Acc:D3ZZI9] [ENSRNOT00000043132]                                                                              | 10,913 |
| 0          | Unknown                                                                                                                                                        | 10,912 |
| Rab8b      | Rattus norvegicus RAB8B, member RAS oncogene family (Rab8b), mRNA [NM_153317]                                                                                  | 10,911 |
| RGD1562127 | PREDICTED: Rattus norvegicus similar to chromosome 11 open reading frame 9 (RGD1562127), mRNA [XM_001080934]                                                   | 10,911 |
| 0          | Unknown                                                                                                                                                        | 10,910 |
| Dctn4      | Rattus norvegicus dynactin 4 (Dctn4), mRNA [NM_053404]                                                                                                         | 10,908 |
| RGD1309748 | Rattus norvegicus similar to CG4768-PA (RGD1309748), mRNA [NM_001106972]                                                                                       | 10,902 |

|           |                                                                                                                                       |        |
|-----------|---------------------------------------------------------------------------------------------------------------------------------------|--------|
| Spats1    | Rattus norvegicus spermatogenesis associated, serine-rich 1 (Spats1), mRNA [NM_181376]                                                | 10,900 |
| Phyhd1    | Rattus norvegicus phytanoyl-CoA dioxygenase domain containing 1 (Phyhd1), mRNA [NM_001013081]                                         | 10,900 |
| Fbxl12    | Rattus norvegicus F-box and leucine-rich repeat protein 12 (Fbxl12), mRNA [NM_001025700]                                              | 10,899 |
| 0         | Unknown                                                                                                                               | 10,897 |
| 0         | PREDICTED: Rattus norvegicus hypothetical protein LOC687735 (LOC687735), mRNA [XM_001079963]                                          | 10,896 |
| 0         | Uncharacterized protein [Source:UniProtKB/TrEMBL;Acc:D3ZHS3] [ENSRNOT00000013881]                                                     | 10,894 |
| Rspry1    | Rattus norvegicus ring finger and SPRY domain containing 1 (Rspry1), mRNA [NM_001100945]                                              | 10,893 |
| 0         | Unknown                                                                                                                               | 10,893 |
| Foxk2     | Rattus norvegicus forkhead box K2 (Foxk2), mRNA [NM_001107075]                                                                        | 10,892 |
| Zfp12     | PREDICTED: Rattus norvegicus zinc finger protein 12 (Zfp12), mRNA [XM_001072483]                                                      | 10,890 |
| Zp3r      | Rattus norvegicus zona pellucida 3 receptor (Zp3r), mRNA [NM_182815]                                                                  | 10,889 |
| Kifap3    | Rattus norvegicus kinesin-associated protein 3 (Kifap3), mRNA [NM_001105964]                                                          | 10,889 |
| Kcnrg     | Rattus norvegicus potassium channel regulator (Kcnrg), mRNA [NM_001191687]                                                            | 10,887 |
| Dnah8     | PREDICTED: Rattus norvegicus dynein, axonemal, heavy chain 8 (Dnah8), mRNA [XM_228058]                                                | 10,886 |
| Zmym3     | Rattus norvegicus zinc finger, MYM-type 3 (Zmym3), mRNA [NM_001040155]                                                                | 10,885 |
| Sdccag3   | Rattus norvegicus serologically defined colon cancer antigen 3 (Sdccag3), mRNA [NM_001013135]                                         | 10,885 |
| Yod1      | Rattus norvegicus YOD1 OTU deubiquinating enzyme 1 homolog (S. cerevisiae) (Yod1), mRNA [NM_001008889]                                | 10,885 |
| Cmtm4     | Rattus norvegicus CKLF-like MARVEL transmembrane domain containing 4 (Cmtm4), mRNA [NM_001172151]                                     | 10,885 |
| Dyrk2     | Rattus norvegicus dual-specificity tyrosine-(Y)-phosphorylation regulated kinase 2 (Dyrk2), mRNA [NM_001108100]                       | 10,883 |
| Gabarapl1 | Rattus norvegicus GABA(A) receptor-associated protein like 1 (Gabarapl1), mRNA [NM_001044294]                                         | 10,883 |
| Secisbp2l | Rattus norvegicus SECIS binding protein 2-like (Secisbp2l), mRNA [NM_001168527]                                                       | 10,881 |
| Rhbdl3    | Rattus norvegicus rhomboid, veinlet-like 3 (Drosophila) (Rhbdl3), mRNA [NM_001105819]                                                 | 10,881 |
| Ywhaq     | Rattus norvegicus tyrosine 3-monooxygenase/tryptophan 5-monooxygenase activation protein, theta polypeptide (Ywhaq), mRNA [NM_013053] | 10,881 |
| Taf1c     | Rattus norvegicus TATA box binding protein (Tbp)-associated factor, RNA polymerase I, C (Taf1c), mRNA [NM_001014155]                  | 10,880 |
| Epn3      | Rattus norvegicus epsin 3 (Epn3), mRNA [NM_001024791]                                                                                 | 10,880 |
| Rab13     | Rattus norvegicus RAB13, member RAS oncogene family (Rab13), mRNA [NM_031092]                                                         | 10,879 |
| Sfrp5     | Rattus norvegicus secreted frizzled-related protein 5 (Sfrp5), mRNA [NM_001107591]                                                    | 10,877 |
| Ccno      | Rattus norvegicus cyclin O (Ccno), mRNA [NM_001109175]                                                                                | 10,877 |
| Dtnb      | Rattus norvegicus dystrobrevin, beta (Dtnb), mRNA [NM_001012191]                                                                      | 10,876 |
| LOC361990 | Rattus norvegicus similar to DKFZP547E1010 protein (LOC361990), mRNA [NM_001014175]                                                   | 10,874 |
| 0         | PREDICTED: Rattus norvegicus rCG56028-like (LOC100363825), miscRNA [XR_085819]                                                        | 10,873 |
| Slc19a1   | Rattus norvegicus solute carrier family 19 (folate transporter), member 1 (Slc19a1), transcript variant 1, mRNA [NM_017299]           | 10,871 |
| Olr1070   | Rattus norvegicus olfactory receptor 1070 (Olr1070), mRNA [NM_001000591]                                                              | 10,870 |
| 0         | Uncharacterized protein [Source:UniProtKB/TrEMBL;Acc:D3Z930] [ENSRNOT00000031558]                                                     | 10,866 |



|            |                                                                                                                                                    |        |
|------------|----------------------------------------------------------------------------------------------------------------------------------------------------|--------|
| Ciapin1    | Rattus norvegicus cytokine induced apoptosis inhibitor 1 (Ciapin1), mRNA [NM_001007689]                                                            | 10,865 |
| Tp63       | Rattus norvegicus tumor protein p63 (Tp63), transcript variant 3, mRNA [NM_001127341]                                                              | 10,864 |
| Far1       | Rattus norvegicus TL0ADA37YA18 mRNA sequence. [FQ221385]                                                                                           | 10,864 |
| Nfat5      | Rattus norvegicus nuclear factor of activated T-cells 5 (Nfat5), mRNA [NM_001107425]                                                               | 10,864 |
| RGD1562143 | PREDICTED: Rattus norvegicus similar to Ctps protein (RGD1562143), mRNA [XM_001062088]                                                             | 10,863 |
| Dnajb1     | Rattus norvegicus DnaJ (Hsp40) homolog, subfamily B, member 1 (Dnajb1), mRNA [NM_001108441]                                                        | 10,858 |
| 0          | Unknown                                                                                                                                            | 10,856 |
| Wdfy1      | Rattus norvegicus WD repeat and FYVE domain containing 1 (Wdfy1), mRNA [NM_001008331]                                                              | 10,856 |
| Hoxa9l     | RCG52500, isoform CRA_aUncharacterized protein [Source:UniProtKB/TrEMBL;Acc:D3ZSU5] [ENSRNOT00000009487]                                           | 10,854 |
| Zfp354c    | Rattus norvegicus zinc finger protein 354C (Zfp354c), mRNA [NM_023988]                                                                             | 10,853 |
| 0          | Unknown                                                                                                                                            | 10,852 |
| Dnaja3     | Rattus norvegicus DnaJ (Hsp40) homolog, subfamily A, member 3 (Dnaja3), transcript variant 1, mRNA [NM_001038595]                                  | 10,852 |
| LOC311578  | Rattus norvegicus mRNA for CSG142, partial cds. [AB190506]                                                                                         | 10,850 |
| Sorl1      | Rattus norvegicus sortilin-related receptor, LDLR class A repeats-containing (Sorl1), mRNA [NM_053519]                                             | 10,850 |
| Ppapdc1a   | Rattus norvegicus phosphatidic acid phosphatase type 2 domain containing 1A (Ppapdc1a), mRNA [NM_001191631]                                        | 10,848 |
| Elmod2     | Rattus norvegicus ELMO/CED-12 domain containing 2 (Elmod2), mRNA [NM_001109506]                                                                    | 10,846 |
| 0          | Rattus norvegicus similar to glyceraldehyde-3-phosphate dehydrogenase (LOC317168), mRNA [XM_228411]                                                | 10,845 |
| RGD1561832 | PREDICTED: Rattus norvegicus similar to CDNA sequence BC043301 (RGD1561832), mRNA [XM_001080370]                                                   | 10,844 |
| Zfand2a    | Rattus norvegicus zinc finger, AN1-type domain 2A (Zfand2a), mRNA [NM_001008363]                                                                   | 10,843 |
| Sepx1      | Rattus norvegicus selenoprotein X, 1 (Sepx1), mRNA [NM_001044285]                                                                                  | 10,842 |
| 0          | Rattus norvegicus similar to glyceraldehyde-3-phosphate dehydrogenase (phosphorylating) (EC 1.2.1.12) - mouse (LOC295452), mRNA [XM_227696]        | 10,842 |
| LOC688776  | Uncharacterized protein [Source:UniProtKB/TrEMBL;Acc:D4AAL7] [ENSRNOT00000049703]                                                                  | 10,840 |
| 0          | PREDICTED: Rattus norvegicus zinc finger protein 770 (Znf770), mRNA [XM_001079020]                                                                 | 10,839 |
| Smarcc1    | Rattus norvegicus SWI/SNF related, matrix associated, actin dependent regulator of chromatin, subfamily c, member 1 (Smarcc1), mRNA [NM_001106861] | 10,837 |
| Rpl18a     | Rattus norvegicus ribosomal protein L18A (Rpl18a), mRNA [NM_212510]                                                                                | 10,837 |
| 0          | Unknown                                                                                                                                            | 10,833 |
| Cbfb       | Rattus norvegicus core-binding factor, beta subunit (Cbfb), mRNA [NM_001013191]                                                                    | 10,832 |
| 0          | Q2U0J3_ASPOR (Q2U0J3) Synaptic vesicle transporter SVOP and related transporters, partial (3%) [TC622715]                                          | 10,829 |
| 0          | Uncharacterized protein [Source:UniProtKB/TrEMBL;Acc:D4ADG6] [ENSRNOT00000045033]                                                                  | 10,828 |
| 0          | Unknown                                                                                                                                            | 10,826 |
| 0          | Unknown                                                                                                                                            | 10,826 |

|            |                                                                                                                                                                 |               |
|------------|-----------------------------------------------------------------------------------------------------------------------------------------------------------------|---------------|
| Cdc2l5     | PREDICTED: Rattus norvegicus cell division cycle 2-like 5 (cholinesterase-related cell division controller), transcript variant 2 (Cdc2l5), mRNA [XM_001053609] | <b>10,824</b> |
| LOC681849  | Uncharacterized protein [Source:UniProtKB/TrEMBL;Acc:D4A3C4] [ENSRNOT00000007809]                                                                               | <b>10,824</b> |
| Fam84a     | Rattus norvegicus family with sequence similarity 84, member A (Fam84a), mRNA [NM_001127299]                                                                    | <b>10,824</b> |
| 0          | Unknown                                                                                                                                                         | <b>10,822</b> |
| 0          | Unknown                                                                                                                                                         | <b>10,821</b> |
| 0          | Unknown                                                                                                                                                         | <b>10,820</b> |
| 0          | voltage-dependent anion channel 1 (Vdac1), nuclear gene encoding mitochondrial protein, mRNA [Source:RefSeq DNA;Acc:NM_031353] [ENSRNOT00000006775]             | <b>10,819</b> |
| ErbB2      | Rattus norvegicus v-erb-b2 erythroblastic leukemia viral oncogene homolog 2, neuro/glioblastoma derived oncogene homolog (avian) (ErbB2), mRNA [NM_017003]      | <b>10,815</b> |
| Lcmt2      | Rattus norvegicus leucine carboxyl methyltransferase 2 (Lcmt2), mRNA [NM_001011956]                                                                             | <b>10,812</b> |
| Cpsf2      | Rattus norvegicus cleavage and polyadenylation specific factor 2 (Cpsf2), mRNA [NM_001106753]                                                                   | <b>10,811</b> |
| Agfg1      | Rattus norvegicus ArfGAP with FG repeats 1 (Agfg1), mRNA [NM_001135596]                                                                                         | <b>10,809</b> |
| Evx1       | Rattus norvegicus even-skipped homeobox 1 (Evx1), mRNA [NM_001191972]                                                                                           | <b>10,809</b> |
| Col9a1     | Rattus norvegicus collagen, type IX, alpha 1 (Col9a1), mRNA [NM_001100842]                                                                                      | <b>10,808</b> |
| Smpd4      | Rattus norvegicus sphingomyelin phosphodiesterase 4, neutral membrane (Smpd4), mRNA [NM_001167806]                                                              | <b>10,806</b> |
| Hibch      | Rattus norvegicus 3-hydroxyisobutyryl-Coenzyme A hydrolase (Hibch), nuclear gene encoding mitochondrial protein, mRNA [NM_001013112]                            | <b>10,805</b> |
| Ddx19a     | Rattus norvegicus DEAD (Asp-Glu-Ala-Asp) box polypeptide 19a (Ddx19a), mRNA [NM_001005381]                                                                      | <b>10,805</b> |
| Ldlr       | Rattus norvegicus low density lipoprotein receptor (Ldlr), mRNA [NM_175762]                                                                                     | <b>10,804</b> |
| 0          | U1 small nuclear ribonucleoprotein C [Source:UniProtKB/TrEMBL;Acc:D3ZCL3] [ENSRNOT00000000586]                                                                  | <b>10,801</b> |
| Fgfr3      | Rattus norvegicus fibroblast growth factor receptor 3 (Fgfr3), mRNA [NM_053429]                                                                                 | <b>10,799</b> |
| Med24      | Rattus norvegicus mediator complex subunit 24 (Med24), mRNA [NM_001034079]                                                                                      | <b>10,798</b> |
| Ucma       | Rattus norvegicus upper zone of growth plate and cartilage matrix associated (Ucma), mRNA [NM_001106121]                                                        | <b>10,798</b> |
| Olr1750    | Rattus norvegicus olfactory receptor 1750 (Olr1750), mRNA [NM_212493]                                                                                           | <b>10,798</b> |
| Smarca1    | Rattus norvegicus SWI/SNF related, matrix associated, actin dependent regulator of chromatin, subfamily e, member 1 (Smarca1), mRNA [NM_001024993]              | <b>10,797</b> |
| Atp2a2     | Rattus norvegicus ATPase, Ca <sup>++</sup> transporting, cardiac muscle, slow twitch 2 (Atp2a2), transcript variant 2, mRNA [NM_001110139]                      | <b>10,796</b> |
| Pkm2       | Rattus norvegicus pyruvate kinase, muscle (Pkm2), mRNA [NM_053297]                                                                                              | <b>10,796</b> |
| RGD1306613 | Rattus norvegicus similar to RIKEN cDNA 1600012F09 (RGD1306613), mRNA [NM_001107356]                                                                            | <b>10,794</b> |
| Dync1li2   | Rattus norvegicus dynein, cytoplasmic 1 light intermediate chain 2 (Dync1li2), mRNA [NM_031026]                                                                 | <b>10,793</b> |
| Ng35       | Rattus norvegicus Ng35 pseudogene (Ng35), mRNA [NM_001134991]                                                                                                   | <b>10,793</b> |
| 0          | BQ210707 UI-R-DY1-com-a-24-0-UI.s1 NCI_CGAP_DY1 Rattus norvegicus cDNA clone IMAGE:7337090 3', mRNA sequence [BQ210707]                                         | <b>10,792</b> |
| Lrrc36     | Rattus norvegicus leucine rich repeat containing 36 (Lrrc36), mRNA [NM_001004088]                                                                               | <b>10,790</b> |

|            |                                                                                                                                                                            |        |
|------------|----------------------------------------------------------------------------------------------------------------------------------------------------------------------------|--------|
| Wee1       | Rattus norvegicus wee 1 homolog (S. pombe) (Wee1), mRNA [NM_001012742]                                                                                                     | 10,789 |
| Iqgap1     | Rattus norvegicus IQ motif containing GTPase activating protein 1 (Iqgap1), mRNA [NM_001108489]                                                                            | 10,787 |
| RGD1563194 | PREDICTED: Rattus norvegicus similar to ribosomal protein L13 (RGD1563194), miscRNA [XR_009316]                                                                            | 10,787 |
| Dnajc14    | Rattus norvegicus DnaJ (Hsp40) homolog, subfamily C, member 14 (Dnajc14), mRNA [NM_053690]                                                                                 | 10,785 |
| 0          | Uncharacterized protein [Source:UniProtKB/TrEMBL;Acc:D4A268] [ENSRNOT00000007350]                                                                                          | 10,785 |
| Hes6       | Rattus norvegicus hairy and enhancer of split 6 (Drosophila) (Hes6), mRNA [NM_001013179]                                                                                   | 10,785 |
| Nme4       | Rattus norvegicus non-metastatic cells 4, protein expressed in (Nme4), nuclear gene encoding mitochondrial protein, mRNA [NM_001109478]                                    | 10,785 |
| Nfkbil2    | Rattus norvegicus nuclear factor of kappa light polypeptide gene enhancer in B-cells inhibitor-like 2 (Nfkbil2), mRNA [NM_001130572]                                       | 10,779 |
| RGD1306410 | Rattus norvegicus similar to CG14980-PB (RGD1306410), mRNA [NM_001014126]                                                                                                  | 10,778 |
| 0          | TBC domain-containing protein kinase-like protein [Source:RefSeq peptide;Acc:NP_001127985] [ENSRNOT00000015502]                                                            | 10,777 |
| 0          | Unknown                                                                                                                                                                    | 10,777 |
| Ttc39a     | Rattus norvegicus tetratricopeptide repeat domain 39A (Ttc39a), mRNA [NM_001134519]                                                                                        | 10,775 |
| Slc25a25   | Rattus norvegicus solute carrier family 25 (mitochondrial carrier, phosphate carrier), member 25 (Slc25a25), nuclear gene encoding mitochondrial protein, mRNA [NM_145677] | 10,774 |
| Slc2a4     | Rattus norvegicus solute carrier family 2 (facilitated glucose transporter), member 4 (Slc2a4), mRNA [NM_012751]                                                           | 10,773 |
| Snrnp27    | Rattus norvegicus small nuclear ribonucleoprotein 27 (U4/U6.U5) (Snrnp27), mRNA [NM_001108636]                                                                             | 10,770 |
| Mospd1     | Rattus norvegicus motile sperm domain containing 1 (Mospd1), mRNA [NM_001014107]                                                                                           | 10,769 |
| Cep164     | PREDICTED: Rattus norvegicus centrosomal protein 164kDa (Cep164), mRNA [XM_001064241]                                                                                      | 10,768 |
| 0          | Unknown                                                                                                                                                                    | 10,768 |
| Fgfr1      | Rattus norvegicus fibroblast growth factor receptor-like 1 (Fgfr1), mRNA [NM_199114]                                                                                       | 10,767 |
| Atp1b1     | Rattus norvegicus ATPase, Na <sup>+</sup> /K <sup>+</sup> transporting, beta 1 polypeptide (Atp1b1), mRNA [NM_013113]                                                      | 10,762 |
| 0          | Unknown                                                                                                                                                                    | 10,761 |
| LOC683753  | PREDICTED: Rattus norvegicus hypothetical protein LOC683753 (LOC683753), mRNA [XM_001067334]                                                                               | 10,761 |
| Lix1l      | Rattus norvegicus Lix1 homolog (mouse)-like (Lix1l), mRNA [NM_001024303]                                                                                                   | 10,761 |
| Myo9b      | Rattus norvegicus myosin IXb (Myo9b), mRNA [NM_012984]                                                                                                                     | 10,760 |
| Mapk1ip1   | Rattus norvegicus mitogen-activated protein kinase 1 interacting protein 1 (Mapk1ip1), mRNA [NM_001122782]                                                                 | 10,760 |
| 0          | Q7TQ74_RAT (Q7TQ74) Ac1573, partial (11%) [TC600249]                                                                                                                       | 10,758 |
| Nid2       | Rattus norvegicus nidogen 2 (Nid2), mRNA [NM_001012005]                                                                                                                    | 10,757 |
| Ccdc80     | Rattus norvegicus coiled-coil domain containing 80 (Ccdc80), mRNA [NM_022543]                                                                                              | 10,755 |
| 0          | Uncharacterized protein [Source:UniProtKB/TrEMBL;Acc:D3Z1Y8] [ENSRNOT00000029667]                                                                                          | 10,755 |
| Abhd14a    | Rattus norvegicus abhydrolase domain containing 14A (Abhd14a), mRNA [NM_001009670]                                                                                         | 10,754 |
| Bai2       | Rattus norvegicus brain-specific angiogenesis inhibitor 2 (Bai2), mRNA [NM_001107914]                                                                                      | 10,753 |
| 42248      | Rattus norvegicus selenoprotein 15 (Sep15), mRNA [NM_133297]                                                                                                               | 10,753 |
| Ube2j1     | Rattus norvegicus ubiquitin-conjugating enzyme E2, J1 (UBC6 homolog, yeast) (Ube2j1), mRNA [NM_001106642]                                                                  | 10,752 |

|            |                                                                                                                                        |        |
|------------|----------------------------------------------------------------------------------------------------------------------------------------|--------|
| Pacsin2    | Rattus norvegicus protein kinase C and casein kinase substrate in neurons 2 (Pacsin2), mRNA [NM_130740]                                | 10,752 |
| 0          | Unknown                                                                                                                                | 10,751 |
| Rtp4       | Rattus norvegicus receptor (chemosensory) transporter protein 4 (Rtp4), mRNA [NM_001108321]                                            | 10,751 |
| Fpgs       | Rattus norvegicus folylpolyglutamate synthase (Fpgs), nuclear gene encoding mitochondrial protein, mRNA [NM_001146125]                 | 10,750 |
| 0          | Unknown                                                                                                                                | 10,749 |
| Sgms1      | Rattus norvegicus sphingomyelin synthase 1 (Sgms1), mRNA [NM_181386]                                                                   | 10,749 |
| Cycs       | Rattus norvegicus cytochrome c, somatic (Cycs), nuclear gene encoding mitochondrial protein, mRNA [NM_012839]                          | 10,748 |
| Kel        | Rattus norvegicus Kell blood group, metallo-endopeptidase (Kel), mRNA [NM_001191611]                                                   | 10,747 |
| RT1-EC2    | Rattus norvegicus RT1 class Ib, locus EC2 (RT1-EC2), mRNA [NM_012645]                                                                  | 10,745 |
| 0          | Uncharacterized protein [Source:UniProtKB/TrEMBL;Acc:D4A2X3] [ENSRNOT00000038101]                                                      | 10,743 |
| 0          | Uncharacterized protein [Source:UniProtKB/TrEMBL;Acc:D3ZKL6] [ENSRNOT00000044160]                                                      | 10,741 |
| Rhoq       | Rattus norvegicus ras homolog gene family, member Q (Rhoq), mRNA [NM_053522]                                                           | 10,741 |
| Anks6      | Rattus norvegicus ankyrin repeat and sterile alpha motif domain containing 6 (Anks6), mRNA [NM_001015028]                              | 10,740 |
| Zfand1     | PREDICTED: Rattus norvegicus zinc finger, AN1-type domain 1 (Zfand1), mRNA [XM_342213]                                                 | 10,739 |
| Ptgir      | Rattus norvegicus prostaglandin I2 (prostacyclin) receptor (IP) (Ptgir), mRNA [NM_001077644]                                           | 10,739 |
| Olr1681    | Rattus norvegicus olfactory receptor 1681 (Olr1681), mRNA [NM_001001006]                                                               | 10,736 |
| RGD1308319 | Uncharacterized protein [Source:UniProtKB/TrEMBL;Acc:D3ZBT5] [ENSRNOT00000050012]                                                      | 10,734 |
| Rngtt      | Rattus norvegicus RNA guanylyltransferase and 5'-phosphatase (Rngtt), mRNA [NM_001107923]                                              | 10,734 |
| Reck       | Rattus norvegicus reversion-inducing-cysteine-rich protein with kazal motifs (Reck), mRNA [NM_001107954]                               | 10,734 |
| Bbs9       | PREDICTED: Rattus norvegicus Bardet-Biedl syndrome 9 (Bbs9), mRNA [XM_235942]                                                          | 10,733 |
| 0          | Unknown                                                                                                                                | 10,730 |
| Havcr1     | Rattus norvegicus hepatitis A virus cellular receptor 1 (Havcr1), mRNA [NM_173149]                                                     | 10,730 |
| Tacr2      | Rattus norvegicus tachykinin receptor 2 (Tacr2), mRNA [NM_080768]                                                                      | 10,728 |
| 0          | Unknown                                                                                                                                | 10,726 |
| 0          | Unknown                                                                                                                                | 10,725 |
| Prpf38b    | Rattus norvegicus PRP38 pre-mRNA processing factor 38 (yeast) domain containing B (Prpf38b), mRNA [NM_001024305]                       | 10,725 |
| Inpp4a     | Rattus norvegicus inositol polyphosphate-4-phosphatase, type 1 (Inpp4a), mRNA [NM_031002]                                              | 10,725 |
| Ppp1r15a   | Rattus norvegicus protein phosphatase 1, regulatory (inhibitor) subunit 15A (Ppp1r15a), mRNA [NM_133546]                               | 10,723 |
| Fkbp4      | Rattus norvegicus FK506 binding protein 4 (Fkbp4), mRNA [NM_001191863]                                                                 | 10,720 |
| Zfand1     | Putative uncharacterized protein RGD1309519_predictedUncharacterized protein [Source:UniProtKB/TrEMBL;Acc:D3ZQI4] [ENSRNOT00000013905] | 10,719 |
| Pitpnc1    | Uncharacterized protein [Source:UniProtKB/TrEMBL;Acc:D4AE57] [ENSRNOT00000021498]                                                      | 10,719 |
| Ddx3x      | Rattus norvegicus DEAD (Asp-Glu-Ala-Asp) box polypeptide 3, X-linked (Ddx3x), mRNA [NM_001108246]                                      | 10,716 |
| Prom2      | Rattus norvegicus prominin 2 (Prom2), mRNA [NM_138857]                                                                                 | 10,715 |

|            |                                                                                                                                         |               |
|------------|-----------------------------------------------------------------------------------------------------------------------------------------|---------------|
| 0          | Unknown                                                                                                                                 | <b>10,715</b> |
| Etnk2      | Rattus norvegicus ethanolamine kinase 2 (Etnk2), mRNA [NM_001108343]                                                                    | <b>10,714</b> |
| Ptprz1     | Rattus norvegicus protein tyrosine phosphatase, receptor-type, Z polypeptide 1 (Ptprz1), transcript variant 1, mRNA [NM_013080]         | <b>10,714</b> |
| 0          | Unknown                                                                                                                                 | <b>10,713</b> |
| Hes1       | Rattus norvegicus hairy and enhancer of split 1 (Drosophila) (Hes1), mRNA [NM_024360]                                                   | <b>10,713</b> |
| LOC679715  | PREDICTED: Rattus norvegicus similar to ribosomal protein L13 (LOC679715), mRNA [XM_001054162]                                          | <b>10,713</b> |
| 0          | Unknown                                                                                                                                 | <b>10,713</b> |
| Ptprm      | Rattus norvegicus protein tyrosine phosphatase, receptor type, M (Ptprm), mRNA [NM_001168632]                                           | <b>10,711</b> |
| 0          | Unknown                                                                                                                                 | <b>10,710</b> |
| Fam104a    | Rattus norvegicus family with sequence similarity 104, member A (Fam104a), mRNA [NM_001034958]                                          | <b>10,709</b> |
| Polr3f     | Rattus norvegicus polymerase (RNA) III (DNA directed) polypeptide F (Polr3f), mRNA [NM_001107784]                                       | <b>10,709</b> |
| Tmem104    | Rattus norvegicus transmembrane protein 104 (Tmem104), mRNA [NM_001191655]                                                              | <b>10,709</b> |
| Camk2b     | Rattus norvegicus calcium/calmodulin-dependent protein kinase II beta (Camk2b), transcript variant 2, mRNA [NM_021739]                  | <b>10,706</b> |
| Tmem106b   | Rattus norvegicus transmembrane protein 106B (Tmem106b), mRNA [NM_001004267]                                                            | <b>10,706</b> |
| Wnt16      | Rattus norvegicus wingless-type MMTV integration site family, member 16 (Wnt16), mRNA [NM_001109223]                                    | <b>10,704</b> |
| Rpl23a     | Rattus norvegicus ribosomal protein L23a (Rpl23a), mRNA [NM_001108283]                                                                  | <b>10,701</b> |
| Fam18a     | Rattus norvegicus family with sequence similarity 18, member A (Fam18a), mRNA [NM_001108263]                                            | <b>10,701</b> |
| Ncf1       | Rattus norvegicus neutrophil cytosolic factor 1 (Ncf1), mRNA [NM_053734]                                                                | <b>10,697</b> |
| Peg10      | PREDICTED: Rattus norvegicus paternally expressed 10 (Peg10), mRNA [XM_001053454]                                                       | <b>10,696</b> |
| Ttc38      | Rattus norvegicus tetratricopeptide repeat domain 38 (Ttc38), mRNA [NM_001130499]                                                       | <b>10,696</b> |
| Ccr10      | Rattus norvegicus chemokine (C-C motif) receptor 10 (Ccr10), mRNA [NM_001108836]                                                        | <b>10,695</b> |
| Cyp4v3     | Rattus norvegicus cytochrome P450, family 4, subfamily v, polypeptide 3 (Cyp4v3), mRNA [NM_001135600]                                   | <b>10,695</b> |
| Tmem82     | Putative uncharacterized protein RGD1566169_predictedUncharacterized protein [Source:UniProtKB/TrEMBL;Acc:D4A8K4] [ENSRNOT00000016176]  | <b>10,693</b> |
| 0          | Unknown                                                                                                                                 | <b>10,693</b> |
| 0          | SC23A_MOUSE (Q01405) Protein transport protein Sec23A (SEC23-related protein A), complete [TC596010]                                    | <b>10,692</b> |
| RGD1560151 | PREDICTED: Rattus norvegicus similar to predicted CDS, mechanosensory transduction channel NOMPC (1O503) (RGD1560151), mRNA [XM_576520] | <b>10,692</b> |
| Znf629     | Rattus norvegicus zinc finger protein-like mRNA, complete sequence. [AY589489]                                                          | <b>10,686</b> |
| 0          | Unknown                                                                                                                                 | <b>10,684</b> |
| Gprc5c     | G-protein coupled receptor family C group 5 member C [Source:UniProtKB/Swiss-Prot;Acc:Q3KRC4] [ENSRNOT00000004256]                      | <b>10,681</b> |
| Slc30a4    | Rattus norvegicus solute carrier family 30 (zinc transporter), member 4 (Slc30a4), mRNA [NM_172066]                                     | <b>10,681</b> |
| Dennd5a    | Rattus norvegicus DENN/MADD domain containing 5A (Dennd5a), mRNA [NM_001107546]                                                         | <b>10,678</b> |
| Mpz        | Rattus norvegicus myelin protein zero (Mpz), mRNA [NM_017027]                                                                           | <b>10,677</b> |

|            |                                                                                                                                            |        |
|------------|--------------------------------------------------------------------------------------------------------------------------------------------|--------|
| 0          | Uncharacterized protein [Source:UniProtKB/TrEMBL;Acc:D4AA66] [ENSRNOT00000056882]                                                          | 10,676 |
| Rfc1       | Rattus norvegicus replication factor C (activator 1) 1 (Rfc1), mRNA [NM_053547]                                                            | 10,675 |
| 0          | Uncharacterized protein [Source:UniProtKB/TrEMBL;Acc:D3ZAF9] [ENSRNOT00000005478]                                                          | 10,673 |
| Cyth1      | Rattus norvegicus cytohesin 1 (Cyth1), mRNA [NM_053910]                                                                                    | 10,672 |
| RGD1304810 | Rattus norvegicus similar to 6430573F11Rik protein (RGD1304810), mRNA [NM_001107314]                                                       | 10,672 |
| 0          | Uncharacterized protein [Source:UniProtKB/TrEMBL;Acc:D3ZHU8] [ENSRNOT00000001891]                                                          | 10,670 |
| Nptx2      | Rattus norvegicus neuronal pentraxin 2 (Nptx2), mRNA [NM_001034199]                                                                        | 10,666 |
| LOC680200  | Rattus norvegicus similar to zinc finger protein 455 (LOC680200), mRNA [NM_001139491]                                                      | 10,664 |
| Tmem35     | Rattus norvegicus transmembrane protein 35 (Tmem35), mRNA [NM_001001799]                                                                   | 10,662 |
| RGD1565469 | Rattus norvegicus RGD1565469 (RGD1565469), mRNA [NM_001109340]                                                                             | 10,662 |
| 0          | Unknown                                                                                                                                    | 10,661 |
| 0          | Uncharacterized protein [Source:UniProtKB/TrEMBL;Acc:D3Z969] [ENSRNOT00000036676]                                                          | 10,660 |
| Cgref1     | Rattus norvegicus cell growth regulator with EF hand domain 1 (Cgref1), mRNA [NM_139087]                                                   | 10,658 |
| Abcc5      | Rattus norvegicus ATP-binding cassette, subfamily C (CFTR/MRP), member 5 (Abcc5), mRNA [NM_053924]                                         | 10,657 |
| Wars2      | Rattus norvegicus tryptophanyl tRNA synthetase 2 (mitochondrial) (Wars2), nuclear gene encoding mitochondrial protein, mRNA [NM_001168641] | 10,657 |
| Vash2      | Rattus norvegicus vasohibin 2 (Vash2), mRNA [NM_001109082]                                                                                 | 10,657 |
| Mbp        | Rattus norvegicus myelin basic protein (Mbp), transcript variant 6, mRNA [NM_001025289]                                                    | 10,655 |
| Aldh18a1   | Rattus norvegicus aldehyde dehydrogenase 18 family, member A1 (Aldh18a1), nuclear gene encoding mitochondrial protein, mRNA [NM_001108524] | 10,655 |
| Col19a1    | Uncharacterized protein [Source:UniProtKB/TrEMBL;Acc:D3ZCQ0] [ENSRNOT00000017169]                                                          | 10,654 |
| Sh3bp2     | Rattus norvegicus SH3-domain binding protein 2 (Sh3bp2), mRNA [NM_001100684]                                                               | 10,653 |
| Ide        | Rattus norvegicus insulin degrading enzyme (Ide), mRNA [NM_013159]                                                                         | 10,652 |
| LOC680799  | Rattus norvegicus hypothetical protein LOC680799 (LOC680799), transcript variant 2, mRNA [NM_001163519]                                    | 10,650 |
| 0          | Rattus norvegicus TL0AEA97YK17 mRNA sequence. [FQ230487]                                                                                   | 10,648 |
| 0          | Unknown                                                                                                                                    | 10,646 |
| Crip       | Rattus norvegicus cysteine-rich intestinal protein (Crip), mRNA [NM_001134933]                                                             | 10,645 |
| 0          | PREDICTED: Rattus norvegicus similar to TDPOZ3 (RGD1564313), mRNA [XM_578051]                                                              | 10,642 |
| 0          | Unknown                                                                                                                                    | 10,641 |
| Ythdf3     | Rattus norvegicus YTH domain family, member 3 (Ythdf3), mRNA [NM_001108546]                                                                | 10,640 |
| Setl1      | Rattus norvegicus SET translocation-like 1 (Setl1), mRNA [NM_194353]                                                                       | 10,639 |
| Rpl37a     | Rattus norvegicus ribosomal protein L37a (Rpl37a), transcript variant 2, mRNA [NM_001108801]                                               | 10,638 |
| 0          | Unknown                                                                                                                                    | 10,637 |
| Phc1       | Rattus norvegicus polyhomeotic homolog 1 (Drosophila) (Phc1), mRNA [NM_001107886]                                                          | 10,637 |
| Mafb       | Rattus norvegicus v-maf musculoaponeurotic fibrosarcoma oncogene homolog B (avian) (Mafb), mRNA [NM_019316]                                | 10,636 |

|              |                                                                                                                                              |               |
|--------------|----------------------------------------------------------------------------------------------------------------------------------------------|---------------|
| RGD1311458   | Rattus norvegicus similar to cDNA sequence BC027231; hypothetical protein MGC27931 (RGD1311458), mRNA [NM_001009678]                         | <b>10,632</b> |
| Btbd9        | Rattus norvegicus BTB (POZ) domain containing 9 (Btbd9), mRNA [NM_001013073]                                                                 | <b>10,630</b> |
| Fmr1         | Rattus norvegicus fragile X mental retardation 1 (Fmr1), mRNA [NM_052804]                                                                    | <b>10,630</b> |
| 0            | Rattus norvegicus similar to splicing-related factor RNPS1 (LOC312994), mRNA [XM_232688]                                                     | <b>10,627</b> |
| 0            | Unknown                                                                                                                                      | <b>10,626</b> |
| 0            | YLP motif-containing protein 1 [Source:UniProtKB/Swiss-Prot;Acc:P0CB49] [ENSRNOT00000047060]                                                 | <b>10,626</b> |
| 0            | Rattus norvegicus similar to glyceraldehyde-3-phosphate dehydrogenase (phosphorylating) (EC 1.2.1.12) - mouse (LOC291545), mRNA [XM_225859]  | <b>10,626</b> |
| Snta1        | Rattus norvegicus syntrophin, acidic 1 (Snta1), mRNA [NM_001100901]                                                                          | <b>10,626</b> |
| LOC641520    | Rattus norvegicus popeye domain-containing 3 (LOC641520), mRNA [NM_001037369]                                                                | <b>10,625</b> |
| Olr702       | PREDICTED: Rattus norvegicus olfactory receptor 702 (Olr702), partial mRNA [XM_001077079]                                                    | <b>10,622</b> |
| Tmem200b     | Uncharacterized protein [Source:UniProtKB/TrEMBL;Acc:D3Z9B6] [ENSRNOT00000047917]                                                            | <b>10,621</b> |
| Rgs6         | PREDICTED: Rattus norvegicus regulator of G-protein signaling 6 (Rgs6), mRNA [XM_001063200]                                                  | <b>10,620</b> |
| Hipk1        | Rattus norvegicus homeodomain interacting protein kinase 1 (Hipk1), mRNA [NM_001100986]                                                      | <b>10,618</b> |
| 0            | Uncharacterized protein [Source:UniProtKB/TrEMBL;Acc:D3ZKK0] [ENSRNOT00000062088]                                                            | <b>10,618</b> |
| Tmem56       | Rattus norvegicus transmembrane protein 56 (Tmem56), mRNA [NM_001135879]                                                                     | <b>10,618</b> |
| 0            | Q9NRI8_HUMAN (Q9NRI8) HT014, complete [TC634078]                                                                                             | <b>10,618</b> |
| Kdm4a        | Rattus norvegicus lysine (K)-specific demethylase 4A (Kdm4a), mRNA [NM_001107966]                                                            | <b>10,617</b> |
| Apobec3f     | Rattus norvegicus apolipoprotein B mRNA editing enzyme, catalytic polypeptide-like 3F (Apobec3f), mRNA [NM_001033703]                        | <b>10,616</b> |
| Gng5         | Rattus norvegicus guanine nucleotide binding protein (G protein), gamma 5 (Gng5), mRNA [NM_024377]                                           | <b>10,614</b> |
| Nde1         | Rattus norvegicus nudE nuclear distribution gene E homolog 1 (A. nidulans) (Nde1), mRNA [NM_053347]                                          | <b>10,613</b> |
| 0            | Unknown                                                                                                                                      | <b>10,611</b> |
| 0            | Unknown                                                                                                                                      | <b>10,611</b> |
| Batf2        | Similar to RIKEN cDNA 4933430F08 (Predicted), isoform CRA_bUncharacterized protein [Source:UniProtKB/TrEMBL;Acc:D3ZT85] [ENSRNOT00000028527] | <b>10,610</b> |
| RGD1563556   | Uncharacterized protein [Source:UniProtKB/TrEMBL;Acc:D3ZT87] [ENSRNOT00000029887]                                                            | <b>10,610</b> |
| Ppp1r1a      | Rattus norvegicus protein phosphatase 1, regulatory (inhibitor) subunit 1A (Ppp1r1a), mRNA [NM_022676]                                       | <b>10,609</b> |
| 0            | Unknown                                                                                                                                      | <b>10,609</b> |
| Glce         | RCG57892Uncharacterized protein [Source:UniProtKB/TrEMBL;Acc:D3ZIK0] [ENSRNOT00000038641]                                                    | <b>10,609</b> |
| LOC100364959 | PREDICTED: Rattus norvegicus basic transcription factor 3-like (LOC100364959), mRNA [XM_002727692]                                           | <b>10,609</b> |
| 0            | Uncharacterized protein [Source:UniProtKB/TrEMBL;Acc:D3ZVJ6] [ENSRNOT00000037445]                                                            | <b>10,608</b> |
| Sdpr         | Rattus norvegicus serum deprivation response (Sdpr), mRNA [NM_001007712]                                                                     | <b>10,604</b> |
| Vcan         | Rattus norvegicus versican (Vcan), transcript variant 2, mRNA [NM_053663]                                                                    | <b>10,604</b> |
| Znf282       | Rattus norvegicus zinc finger protein 282 (Znf282), mRNA [NM_001106592]                                                                      | <b>10,604</b> |

|            |                                                                                                                           |        |
|------------|---------------------------------------------------------------------------------------------------------------------------|--------|
| Tcea1      | Rattus norvegicus transcription elongation factor A (SII) 1 (Tcea1), mRNA [NM_001025735]                                  | 10,603 |
| 0          | Protein tyrosine phosphatase delta [Source:UniProtKB/TrEMBL;Acc:Q62990] [ENSRNOT00000025426]                              | 10,602 |
| Plce1      | Rattus norvegicus phospholipase C, epsilon 1 (Plce1), mRNA [NM_053758]                                                    | 10,600 |
| Arl6       | Rattus norvegicus ADP-ribosylation factor-like 6 (Arl6), mRNA [NM_001108842]                                              | 10,597 |
| 0          | predicted gene 12258 Gene [Source:MGI Symbol;Acc:MGI:3651534] [ENSRNOT00000067580]                                        | 10,597 |
| 0          | Uncharacterized protein [Source:UniProtKB/TrEMBL;Acc:D4A0Y6] [ENSRNOT00000038176]                                         | 10,597 |
| Eif4a1     | Rattus norvegicus eukaryotic translation initiation factor 4A, isoform 1 (Eif4a1), mRNA [NM_199372]                       | 10,597 |
| Zc3h12c    | Rattus norvegicus zinc finger CCCH type containing 12C (Zc3h12c), mRNA [NM_001108146]                                     | 10,594 |
| LOC690206  | Rattus norvegicus hypothetical protein LOC690206 (LOC690206), mRNA [NM_001109567]                                         | 10,593 |
| Dnajc21    | Rattus norvegicus DnaJ (Hsp40) homolog, subfamily C, member 21 (Dnajc21), mRNA [NM_138856]                                | 10,592 |
| 0          | Unknown                                                                                                                   | 10,592 |
| Wnk4       | Rattus norvegicus WNK lysine deficient protein kinase 4 (Wnk4), mRNA [NM_175579]                                          | 10,587 |
| 0          | Unknown                                                                                                                   | 10,587 |
| Tmem90b    | Rattus norvegicus transmembrane protein 90B (Tmem90b), mRNA [NM_001025020]                                                | 10,586 |
| Slc16a8    | Monocarboxylate transporter 3 [Source:UniProtKB/Swiss-Prot;Acc:O70461] [ENSRNOT00000016247]                               | 10,586 |
| Mzf1       | Rattus norvegicus myeloid zinc finger 1 (Mzf1), mRNA [NM_001108470]                                                       | 10,584 |
| 0          | LRRG00123LRRGT00103RCG65927 [Source:UniProtKB/TrEMBL;Acc:Q6QI85] [ENSRNOT00000043973]                                     | 10,583 |
| Ppard      | Rattus norvegicus peroxisome proliferator-activated receptor delta (Ppard), mRNA [NM_013141]                              | 10,582 |
| Trub2      | Rattus norvegicus TruB pseudouridine (psi) synthase homolog 2 (E. coli) (Trub2), mRNA [NM_001014257]                      | 10,582 |
| Cask       | Rattus norvegicus calcium/calmodulin-dependent serine protein kinase (MAGUK family) (Cask), mRNA [NM_022184]              | 10,579 |
| 0          | Unknown                                                                                                                   | 10,577 |
| 0          | Rattus norvegicus similar to glyceraldehyde-3-phosphate dehydrogenase (LOC294417), mRNA [XM_228193]                       | 10,577 |
| Mrps21l    | PREDICTED: Rattus norvegicus mitochondrial ribosomal protein S21-like (Mrps21l), mRNA [XM_001057655]                      | 10,575 |
| 0          | Unknown                                                                                                                   | 10,574 |
| Prdx3      | Rattus norvegicus peroxiredoxin 3 (Prdx3), nuclear gene encoding mitochondrial protein, mRNA [NM_022540]                  | 10,574 |
| RGD1565705 | PREDICTED: Rattus norvegicus similar to chr2 synaptotagmin (RGD1565705), mRNA [XM_002726849]                              | 10,571 |
| 0          | Uncharacterized protein [Source:UniProtKB/TrEMBL;Acc:D3ZKR7] [ENSRNOT00000059076]                                         | 10,571 |
| 0          | Uncharacterized protein [Source:UniProtKB/TrEMBL;Acc:D3ZM66] [ENSRNOT00000042277]                                         | 10,569 |
| 0          | Unknown                                                                                                                   | 10,568 |
| 0          | Ribosomal protein [Source:UniProtKB/TrEMBL;Acc:D3Z9F6] [ENSRNOT00000045023]                                               | 10,568 |
| Ptdss2     | Rattus norvegicus phosphatidylserine synthase 2 (Ptdss2), mRNA [NM_001106316]                                             | 10,568 |
| Cacna1a    | Rattus norvegicus calcium channel, voltage-dependent, P/Q type, alpha 1A subunit (Cacna1a), mRNA [NM_012918]              | 10,566 |
| 0          | Uncharacterized protein [Source:UniProtKB/TrEMBL;Acc:D3ZIH7] [ENSRNOT00000033109]                                         | 10,565 |
| Slc12a2    | Rattus norvegicus solute carrier family 12 (sodium/potassium/chloride transporters), member 2 (Slc12a2), mRNA [NM_031798] | 10,564 |



|            |                                                                                                                        |               |
|------------|------------------------------------------------------------------------------------------------------------------------|---------------|
| Vwf        | von Willebrand factor [Source:UniProtKB/Swiss-Prot;Acc:Q62935] [ENSRNOT00000026643]                                    | <b>10,563</b> |
| Olr68      | Rattus norvegicus olfactory receptor 68 (Olr68), mRNA [NM_001000133]                                                   | <b>10,562</b> |
| Usp53      | Rattus norvegicus ubiquitin specific peptidase 53 (Usp53), mRNA [NM_001106468]                                         | <b>10,562</b> |
| Itsn1      | Rattus norvegicus intersectin 1 (SH3 domain protein) (Itsn1), transcript variant 1, mRNA [NM_001136096]                | <b>10,561</b> |
| Vom2r75    | Rattus norvegicus vomeronasal 2 receptor, 75 (Vom2r75), mRNA [NM_173320]                                               | <b>10,560</b> |
| Aqp11      | Rattus norvegicus aquaporin 11 (Aqp11), mRNA [NM_173105]                                                               | <b>10,560</b> |
| Spata20    | Rattus norvegicus spermatogenesis associated 20 (Spata20), mRNA [NM_199402]                                            | <b>10,554</b> |
| 0          | Unknown                                                                                                                | <b>10,554</b> |
| Nt5c3      | Rattus norvegicus 5'-nucleotidase, cytosolic III (Nt5c3), mRNA [NM_001107862]                                          | <b>10,551</b> |
| Slc22a3    | Rattus norvegicus solute carrier family 22 (extraneuronal monoamine transporter), member 3 (Slc22a3), mRNA [NM_019230] | <b>10,551</b> |
| Tyro3      | Rattus norvegicus TYRO3 protein tyrosine kinase (Tyro3), mRNA [NM_017092]                                              | <b>10,550</b> |
| LOC499746  | LOC499746 protein [Source:UniProtKB/TrEMBL;Acc:Q498T7] [ENSRNOT00000013278]                                            | <b>10,544</b> |
| Exosc2     | Rattus norvegicus exosome component 2 (Exosc2), mRNA [NM_001108952]                                                    | <b>10,543</b> |
| Osbpl9     | Rattus norvegicus oxysterol binding protein-like 9 (Osbp19), mRNA [NM_001044234]                                       | <b>10,543</b> |
| Cdc25a     | Rattus norvegicus cell division cycle 25 homolog A (S. pombe) (Cdc25a), mRNA [NM_133571]                               | <b>10,543</b> |
| Ranbp1     | Rattus norvegicus RAN binding protein 1 (Ranbp1), mRNA [NM_001108324]                                                  | <b>10,542</b> |
| Mdk        | Rattus norvegicus midkine (Mdk), mRNA [NM_030859]                                                                      | <b>10,539</b> |
| Hba-a2     | Rattus norvegicus hemoglobin alpha, adult chain 2 (Hba-a2), mRNA [NM_013096]                                           | <b>10,538</b> |
| Dock7      | Rattus norvegicus dedicator of cytokinesis 7 (Dock7), mRNA [NM_001191574]                                              | <b>10,537</b> |
| 0          | RVL6519 Wackym-Soares normalized rat vestibular cDNA library Rattus norvegicus cDNA 5', mRNA sequence [DV716357]       | <b>10,537</b> |
| RGD1561557 | Rattus norvegicus similar to chromosome 21 open reading frame 29 (RGD1561557), mRNA [NM_001108929]                     | <b>10,537</b> |
| Clmn       | Rattus norvegicus calmin (Clmn), mRNA [NM_001106755]                                                                   | <b>10,536</b> |
| RGD1310553 | Rattus norvegicus similar to expressed sequence AI597479 (RGD1310553), mRNA [NM_001008517]                             | <b>10,535</b> |
| Otud5      | Rattus norvegicus OTU domain containing 5 (Otud5), mRNA [NM_001037496]                                                 | <b>10,534</b> |
| Mtx1       | Rattus norvegicus Metaxin 1 (Mtx1), nuclear gene encoding mitochondrial protein, mRNA [NM_001100667]                   | <b>10,533</b> |
| Tm6sf2     | Rattus norvegicus transmembrane 6 superfamily member 2 (Tm6sf2), mRNA [NM_001127654]                                   | <b>10,532</b> |
| B4galt2    | Rattus norvegicus UDP-Gal:betaGlcNAc beta 1,4- galactosyltransferase, polypeptide 2 (B4galt2), mRNA [NM_001107965]     | <b>10,530</b> |
| Eri2       | Rattus norvegicus exoribonuclease 2 (Eri2), mRNA [NM_001191114]                                                        | <b>10,529</b> |
| RGD1561662 | Uncharacterized protein [Source:UniProtKB/TrEMBL;Acc:D3ZVE5] [ENSRNOT00000020516]                                      | <b>10,529</b> |
| Mag        | Rattus norvegicus myelin-associated glycoprotein (Mag), mRNA [NM_017190]                                               | <b>10,527</b> |
| Cul4b      | Rattus norvegicus cullin 4B (Cul4b), mRNA [NM_001106951]                                                               | <b>10,524</b> |
| RT1-CE2    | Rattus norvegicus RT1 class I, locus CE2 (RT1-CE2), mRNA [NM_001008840]                                                | <b>10,522</b> |
| A26c2      | PREDICTED: Rattus norvegicus ANKRD26-like family C, member 2 (A26c2), mRNA [XM_001055615]                              | <b>10,521</b> |
| Znf763     | Rattus norvegicus zinc finger protein 763 (Znf763), mRNA [NM_001108063]                                                | <b>10,519</b> |

|            |                                                                                                             |        |
|------------|-------------------------------------------------------------------------------------------------------------|--------|
| Hltf       | Rattus norvegicus helicase-like transcription factor (Hltf), mRNA [NM_001106478]                            | 10,518 |
| Olr1734    | Rattus norvegicus olfactory receptor 1734 (Olr1734), mRNA [NM_001001119]                                    | 10,517 |
| Mll4       | Uncharacterized protein [Source:UniProtKB/TrEMBL;Acc:D3ZKG0] [ENSRNOT00000046359]                           | 10,514 |
| Kif16b     | Rattus norvegicus kinesin family member 16B (Kif16b), mRNA [NM_001107783]                                   | 10,512 |
| Caprin1    | Rattus norvegicus cell cycle associated protein 1 (Caprin1), mRNA [NM_001012185]                            | 10,511 |
| RGD1565432 | Small VCP/p97-interacting protein [Source:UniProtKB/Swiss-Prot;Acc:P0C0A9] [ENSRNOT00000056024]             | 10,510 |
| Vipr1      | Rattus norvegicus vasoactive intestinal peptide receptor 1 (Vipr1), mRNA [NM_012685]                        | 10,510 |
| Rasgrp1    | Rattus norvegicus RAS guanyl releasing protein 1 (calcium and DAG-regulated) (Rasgrp1), mRNA [NM_019211]    | 10,506 |
| Tmem39a    | Rattus norvegicus transmembrane protein 39a (Tmem39a), mRNA [NM_001013865]                                  | 10,504 |
| 0          | T-cell receptor beta, variable 5.2 Gene [Source:MGI Symbol;Acc:MGI:98602] [ENSRNOT00000067917]              | 10,503 |
| 0          | Unknown                                                                                                     | 10,503 |
| Rapgef5    | Rattus norvegicus Rap guanine nucleotide exchange factor (GEF) 5 (Rapgef5), mRNA [NM_001047915]             | 10,502 |
| Acin1      | Rattus norvegicus apoptotic chromatin condensation inducer 1 (Acin1), mRNA [NM_001170468]                   | 10,500 |
| Hopx       | Rattus norvegicus HOP homeobox (Hopx), mRNA [NM_133621]                                                     | 10,499 |
| Zfp469     | Rattus norvegicus zinc finger protein 469 (Zfp469), mRNA [NM_001107123]                                     | 10,495 |
| Ssfa2      | Rattus norvegicus sperm specific antigen 2 (Ssfa2), mRNA [NM_001107738]                                     | 10,495 |
| Erh        | Rattus norvegicus enhancer of rudimentary homolog (Drosophila) (Erh), mRNA [NM_001109442]                   | 10,494 |
| S1pr3      | Cardiac sphingosine-1-phosphate specific receptor [Source:UniProtKB/TrEMBL;Acc:Q9QZG4] [ENSRNOT00000019473] | 10,494 |
| Wfs1       | Rattus norvegicus Wolfram syndrome 1 homolog (human) (Wfs1), mRNA [NM_031823]                               | 10,493 |
| LOC314600  | Rattus norvegicus similar to zinc finger protein 422, related sequence 1 (LOC314600), mRNA [NM_001126281]   | 10,489 |
| Pex14      | Rattus norvegicus peroxisomal biogenesis factor 14 (Pex14), mRNA [NM_172063]                                | 10,488 |
| Zswim3     | Rattus norvegicus zinc finger, SWIM-type containing 3 (Zswim3), mRNA [NM_001107801]                         | 10,488 |
| 0          | Unknown                                                                                                     | 10,486 |
| 0          | Unknown                                                                                                     | 10,486 |
| RGD1309362 | Rattus norvegicus similar to interferon-inducible GTPase (RGD1309362), mRNA [NM_001024884]                  | 10,480 |
| Rg9mtd2    | Rattus norvegicus RNA (guanine-9-) methyltransferase domain containing 2 (Rg9mtd2), mRNA [NM_001044232]     | 10,479 |
| Fbxw8      | Rattus norvegicus F-box and WD repeat domain containing 8 (Fbxw8), mRNA [NM_001107145]                      | 10,475 |
| 0          | Unknown                                                                                                     | 10,474 |
| 0          | Uncharacterized protein [Source:UniProtKB/TrEMBL;Acc:D3ZD85] [ENSRNOT00000017383]                           | 10,474 |
| 0          | Unknown                                                                                                     | 10,473 |
| Sh2b1      | Rattus norvegicus SH2B adaptor protein 1 (Sh2b1), transcript variant 1, mRNA [NM_134456]                    | 10,473 |
| 0          | Unknown                                                                                                     | 10,472 |
| Atg7       | Rattus norvegicus ATG7 autophagy related 7 homolog (S. cerevisiae) (Atg7), mRNA [NM_001012097]              | 10,471 |
| Rnf14      | Rattus norvegicus ring finger protein 14 (Rnf14), mRNA [NM_001034995]                                       | 10,469 |

|            |                                                                                                                                                                                                  |               |
|------------|--------------------------------------------------------------------------------------------------------------------------------------------------------------------------------------------------|---------------|
| RGD1561231 | PREDICTED: Rattus norvegicus similar to MAP/microtubule affinity-regulating kinase 4 (MAP/microtubule affinity-regulating kinase like 1) (RGD1561231), mRNA [XM_225619]                          | <b>10,469</b> |
| Pramel7    | PREDICTED: Rattus norvegicus similar to PRAMEI7 (RGD1565990), mRNA [XM_001074348]                                                                                                                | <b>10,468</b> |
| Rpgrip1l   | Rattus norvegicus Rpgrip1-like (Rpgrip1l), mRNA [NM_001107414]                                                                                                                                   | <b>10,468</b> |
| Efna5      | Rattus norvegicus ephrin A5 (Efna5), mRNA [NM_053903]                                                                                                                                            | <b>10,468</b> |
| 0          | Unknown                                                                                                                                                                                          | <b>10,466</b> |
| 0          | Sirtuin 1 ((Silent mating type information regulation 2, homolog) 1 (S. cerevisiae) (Predicted), isoform CRA_a)Uncharacterized protein [Source:UniProtKB/TrEMBL;Acc:D4A0K3] [ENSRNOT00000067413] | <b>10,465</b> |
| Olr1555    | Rattus norvegicus olfactory receptor 1555 (Olr1555), mRNA [NM_001000726]                                                                                                                         | <b>10,465</b> |
| 0          | Rattus norvegicus hypothetical gene supported by NM_022920 (LOC360236), mRNA [XM_346394]                                                                                                         | <b>10,464</b> |
| 0          | Unknown                                                                                                                                                                                          | <b>10,464</b> |
| Sfrs2      | Rattus norvegicus splicing factor, arginine/serine-rich 2 (Sfrs2), mRNA [NM_001009720]                                                                                                           | <b>10,462</b> |
| Wwp1       | Rattus norvegicus WW domain containing E3 ubiquitin protein ligase 1 (Wwp1), mRNA [NM_001024757]                                                                                                 | <b>10,462</b> |
| Rbm14      | RNA binding motif protein 4 [Source:RefSeq peptide;Acc:NP_001163955] [ENSRNOT00000026621]                                                                                                        | <b>10,461</b> |
| Icmt       | Rattus norvegicus isoprenylcysteine carboxyl methyltransferase (Icmt), mRNA [NM_133310]                                                                                                          | <b>10,460</b> |
| RGD1306924 | RCG27015, isoform CRA_aUncharacterized protein [Source:UniProtKB/TrEMBL;Acc:D3ZVR0] [ENSRNOT00000018460]                                                                                         | <b>10,459</b> |
| 0          | similar to RIKEN cDNA 1700001E04 (MGC116197), mRNA [Source:RefSeq DNA;Acc:NM_001025755] [ENSRNOT00000043269]                                                                                     | <b>10,459</b> |
| Mterfd2    | Rattus norvegicus MTERF domain containing 2 (Mterfd2), mRNA [NM_001037209]                                                                                                                       | <b>10,456</b> |
| 0          | Uncharacterized protein [Source:UniProtKB/TrEMBL;Acc:D4ADA8] [ENSRNOT00000012904]                                                                                                                | <b>10,456</b> |
| Rtdr1      | Rattus norvegicus rhabdoid tumor deletion region gene 1 (Rtdr1), mRNA [NM_001127557]                                                                                                             | <b>10,456</b> |
| Bcl11b     | Rattus norvegicus B-cell CLL/lymphoma 11B (zinc finger protein) (Bcl11b), mRNA [NM_001108057]                                                                                                    | <b>10,454</b> |
| 0          | Uncharacterized protein [Source:UniProtKB/TrEMBL;Acc:D4ABL4] [ENSRNOT00000060251]                                                                                                                | <b>10,454</b> |
| Ptpn11     | Rattus norvegicus protein tyrosine phosphatase, non-receptor type 11 (Ptpn11), transcript variant 1, mRNA [NM_001177593]                                                                         | <b>10,454</b> |
| Pacsin1    | Rattus norvegicus protein kinase C and casein kinase substrate in neurons 1 (Pacsin1), mRNA [NM_017294]                                                                                          | <b>10,453</b> |
| Capza2     | Rattus norvegicus capping protein (actin filament) muscle Z-line, alpha 2 (Capza2), mRNA [NM_001009180]                                                                                          | <b>10,450</b> |
| Glb1       | Rattus norvegicus galactosidase, beta 1 (Glb1), mRNA [NM_001108192]                                                                                                                              | <b>10,449</b> |
| Jmjd8      | Rattus norvegicus jumonji domain containing 8 (Jmjd8), mRNA [NM_001014116]                                                                                                                       | <b>10,448</b> |
| Trim44     | Rattus norvegicus tripartite motif-containing 44 (Trim44), mRNA [NM_001013203]                                                                                                                   | <b>10,448</b> |
| LOC685994  | PREDICTED: Rattus norvegicus similar to Spetex-2C protein (LOC685994), mRNA [XM_001066107]                                                                                                       | <b>10,447</b> |
| Mettl4     | Rattus norvegicus methyltransferase like 4 (Mettl4), mRNA [NM_001191814]                                                                                                                         | <b>10,442</b> |
| 0          | Unknown                                                                                                                                                                                          | <b>10,442</b> |
| Farp2      | Rattus norvegicus FERM, RhoGEF and pleckstrin domain protein 2 (Farp2), mRNA [NM_001108233]                                                                                                      | <b>10,440</b> |
| Ogg1       | Rattus norvegicus 8-oxoguanine DNA glycosylase (Ogg1), nuclear gene encoding mitochondrial protein, mRNA [NM_030870]                                                                             | <b>10,440</b> |
| Thsd7a     | Rattus norvegicus thrombospondin, type I, domain containing 7A (Thsd7a), mRNA [NM_001191970]                                                                                                     | <b>10,439</b> |

|              |                                                                                                                                           |               |
|--------------|-------------------------------------------------------------------------------------------------------------------------------------------|---------------|
| Atf6b        | Rattus norvegicus activating transcription factor 6 beta (Atf6b), mRNA [NM_001002809]                                                     | <b>10,436</b> |
| Sel1i3       | PREDICTED: Rattus norvegicus similar to RIKEN cDNA 2310045A20 (RGD1562860), mRNA [XM_341223]                                              | <b>10,436</b> |
| Me2          | Rattus norvegicus malic enzyme 2, NAD(+)-dependent, mitochondrial (Me2), nuclear gene encoding mitochondrial protein, mRNA [NM_001107376] | <b>10,435</b> |
| Fam107b      | Rattus norvegicus family with sequence similarity 107, member B (Fam107b), mRNA [NM_001025034]                                            | <b>10,433</b> |
| 0            | PCTK2_RAT (O35831) Serine/threonine-protein kinase PCTAIRE-2 (PCTAIRE-motif protein kinase 2) , complete [TC581304]                       | <b>10,433</b> |
| LOC685179    | Uncharacterized protein [Source:UniProtKB/TrEMBL;Acc:D3ZPF5] [ENSRNOT00000061933]                                                         | <b>10,432</b> |
| 0            | Unknown                                                                                                                                   | <b>10,432</b> |
| Cstf2        | Rattus norvegicus cleavage stimulation factor, 3' pre-RNA subunit 2 (Cstf2), mRNA [NM_001131014]                                          | <b>10,428</b> |
| Robo2        | Rattus norvegicus roundabout homolog 2 (Drosophila) (Robo2), mRNA [NM_032106]                                                             | <b>10,428</b> |
| Fam116a      | Rattus norvegicus family with sequence similarity 116, member A (Fam116a), mRNA [NM_001134467]                                            | <b>10,425</b> |
| Ttc30b       | Rattus norvegicus tetratricopeptide repeat domain 30B (Ttc30b), mRNA [NM_001127607]                                                       | <b>10,423</b> |
| Slc35a4      | Rattus norvegicus solute carrier family 35, member A4 (Slc35a4), mRNA [NM_147140]                                                         | <b>10,420</b> |
| Dcun1d1      | Rattus norvegicus DCN1, defective in cullin neddylation 1, domain containing 1 (S. cerevisiae) (Dcun1d1), mRNA [NM_001107668]             | <b>10,417</b> |
| 0            | Uncharacterized protein [Source:UniProtKB/TrEMBL;Acc:D3ZBC5] [ENSRNOT00000035888]                                                         | <b>10,416</b> |
| Brwd3        | Uncharacterized protein [Source:UniProtKB/TrEMBL;Acc:D3Z8C5] [ENSRNOT00000050336]                                                         | <b>10,416</b> |
| Olr1454      | Rattus norvegicus olfactory receptor 1454 (Olr1454), mRNA [NM_001000020]                                                                  | <b>10,415</b> |
| 0            | Unknown                                                                                                                                   | <b>10,413</b> |
| Cbx1         | PREDICTED: Rattus norvegicus chromobox homolog 1 (HP1 beta homolog Drosophila ) (Cbx1), mRNA [XM_001081346]                               | <b>10,412</b> |
| Elovl1       | Rattus norvegicus elongation of very long chain fatty acids (FEN1/Elo2, SUR4/Elo3, yeast)-like 1 (Elovl1), mRNA [NM_001044275]            | <b>10,409</b> |
| Alox12b      | Rattus norvegicus arachidonate 12-lipoxygenase, 12R type (Alox12b), mRNA [NM_001039377]                                                   | <b>10,408</b> |
| Pnpla6       | PREDICTED: Rattus norvegicus patatin-like phospholipase domain containing 6 (Pnpla6), mRNA [XM_001057249]                                 | <b>10,407</b> |
| MGC93975     | Rattus norvegicus similar to 2310044H10Rik protein (MGC93975), mRNA [NM_001004221]                                                        | <b>10,406</b> |
| 0            | Unknown                                                                                                                                   | <b>10,405</b> |
| LOC498933    | Rattus norvegicus LOC498933 (LOC498933), mRNA [NM_001025764]                                                                              | <b>10,404</b> |
| RGD1310429   | Rattus norvegicus similar to Protein Njmu-R1 (RGD1310429), mRNA [NM_001139506]                                                            | <b>10,404</b> |
| Ccdc15       | PREDICTED: Rattus norvegicus coiled-coil domain containing 15 (Ccdc15), mRNA [XM_001061074]                                               | <b>10,402</b> |
| Defb25       | Rattus norvegicus defensin beta 25 (Defb25), mRNA [NM_001037516]                                                                          | <b>10,402</b> |
| Kcnk12       | Rattus norvegicus potassium channel, subfamily K, member 12 (Kcnk12), mRNA [NM_022292]                                                    | <b>10,401</b> |
| Rab27b       | Rattus norvegicus RAB27B, member RAS oncogene family (Rab27b), mRNA [NM_053459]                                                           | <b>10,400</b> |
| 0            | Unknown                                                                                                                                   | <b>10,395</b> |
| Murc         | Rattus norvegicus muscle-related coiled-coil protein (Murc), mRNA [NM_001107931]                                                          | <b>10,394</b> |
| LOC100363412 | Uncharacterized protein [Source:UniProtKB/TrEMBL;Acc:D3ZGD4] [ENSRNOT00000064810]                                                         | <b>10,391</b> |
| Bcan         | Rattus norvegicus brevican (Bcan), transcript variant 1, mRNA [NM_001033665]                                                              | <b>10,390</b> |

|            |                                                                                                                                                                                       |               |
|------------|---------------------------------------------------------------------------------------------------------------------------------------------------------------------------------------|---------------|
| 0          | Rattus norvegicus similar to DNA methyltransferase 3A (LOC289651), mRNA [XM_223446]                                                                                                   | <b>10,390</b> |
| Abhd13     | Rattus norvegicus abhydrolase domain containing 13 (Abhd13), mRNA [NM_001107327]                                                                                                      | <b>10,389</b> |
| Hsp90aa1   | Rattus norvegicus heat shock protein 90, alpha (cytosolic), class A member 1 (Hsp90aa1), mRNA [NM_175761]                                                                             | <b>10,388</b> |
| 0          | Unknown                                                                                                                                                                               | <b>10,386</b> |
| Cmtm3      | Rattus norvegicus CKLF-like MARVEL transmembrane domain containing 3 (Cmtm3), mRNA [NM_001106164]                                                                                     | <b>10,386</b> |
| Calu       | Rattus norvegicus calumenin (Calu), transcript variant 2, mRNA [NM_001033898]                                                                                                         | <b>10,384</b> |
| 0          | Rattus norvegicus similar to NHP2-like protein 1 (High mobility group-like nuclear protein 2 homolog 1) ([U4/U6.U5] tri-snRNP 15.5 kDa protein) (OTK27) (LOC298245), mRNA [XM_233180] | <b>10,384</b> |
| Defa10     | Rattus norvegicus defensin alpha 10 (Defa10), mRNA [NM_001033074]                                                                                                                     | <b>10,383</b> |
| 0          | TCDD-inducible poly(ADP-ribose) polymerase (Predicted)Uncharacterized protein [Source:UniProtKB/TrEMBL;Acc:D3ZMH5] [ENSRNOT00000015387]                                               | <b>10,383</b> |
| 0          | FM054771 etcmhea Rattus norvegicus cDNA clone etcmheaP0020N18 5', mRNA sequence [FM054771]                                                                                            | <b>10,382</b> |
| Apbb1      | Rattus norvegicus amyloid beta (A4) precursor protein-binding, family B, member 1 (Fe65) (Apbb1), mRNA [NM_080478]                                                                    | <b>10,379</b> |
| Ap2b1      | Rattus norvegicus adaptor-related protein complex 2, beta 1 subunit (Ap2b1), mRNA [NM_080583]                                                                                         | <b>10,379</b> |
| 0          | Unknown                                                                                                                                                                               | <b>10,376</b> |
| Kdelr2     | Rattus norvegicus KDEL (Lys-Asp-Glu-Leu) endoplasmic reticulum protein retention receptor 2 (Kdelr2), mRNA [NM_001013122]                                                             | <b>10,375</b> |
| LOC684035  | PREDICTED: Rattus norvegicus similar to arginyl aminopeptidase (aminopeptidase B)-like 1 (LOC684035), miscRNA [XR_085919]                                                             | <b>10,374</b> |
| Gtf3c1     | Rattus norvegicus general transcription factor IIIC, polypeptide 1, alpha (Gtf3c1), mRNA [NM_133541]                                                                                  | <b>10,373</b> |
| Bmp1       | Rattus norvegicus bone morphogenetic protein 1 (Bmp1), mRNA [NM_031323]                                                                                                               | <b>10,371</b> |
| 0          | Unknown                                                                                                                                                                               | <b>10,371</b> |
| Glis2      | Rattus norvegicus GLIS family zinc finger 2 (Glis2), mRNA [NM_001106978]                                                                                                              | <b>10,369</b> |
| Vdac1      | Rattus norvegicus voltage-dependent anion channel 1 (Vdac1), nuclear gene encoding mitochondrial protein, mRNA [NM_031353]                                                            | <b>10,368</b> |
| Tead3      | Rattus norvegicus TEA domain family member 3 (Tead3), mRNA [NM_001098216]                                                                                                             | <b>10,363</b> |
| Lass1      | Rattus norvegicus LAG1 homolog, ceramide synthase 1 (Lass1), mRNA [NM_001044230]                                                                                                      | <b>10,363</b> |
| Cntn1      | Rattus norvegicus contactin 1 (Cntn1), mRNA [NM_057118]                                                                                                                               | <b>10,363</b> |
| RGD1565947 | Rattus norvegicus similar to netrin 4 (RGD1565947), mRNA [NM_001106780]                                                                                                               | <b>10,362</b> |
| Uqcrcq     | Rattus norvegicus ubiquinol-cytochrome c reductase, complex III subunit VII (Uqcrcq), nuclear gene encoding mitochondrial protein, mRNA [NM_001025134]                                | <b>10,361</b> |
| Fth1       | Rattus norvegicus ferritin, heavy polypeptide 1 (Fth1), mRNA [NM_012848]                                                                                                              | <b>10,361</b> |
| 0          | Unknown                                                                                                                                                                               | <b>10,361</b> |
| Lkap       | Rattus norvegicus limkain b1 (Lkap), mRNA [NM_133421]                                                                                                                                 | <b>10,360</b> |
| Dmrct1b    | PREDICTED: Rattus norvegicus DMRT-like family C1b (Dmrct1b), mRNA [XM_001055549]                                                                                                      | <b>10,360</b> |
| Vps35      | Rattus norvegicus vacuolar protein sorting 35 homolog (S. cerevisiae) (Vps35), mRNA [NM_001105718]                                                                                    | <b>10,358</b> |
| 0          | Unknown                                                                                                                                                                               | <b>10,352</b> |

|            |                                                                                                                                                                             |        |
|------------|-----------------------------------------------------------------------------------------------------------------------------------------------------------------------------|--------|
| Lrrc43     | Rattus norvegicus leucine rich repeat containing 43 (Lrrc43), mRNA [NM_001170396]                                                                                           | 10,352 |
| 0          | LRRG00131 [Source:UniProtKB/TrEMBL;Acc:Q6QI77] [ENSRNOT00000051980]                                                                                                         | 10,352 |
| Dnajb2     | Rattus norvegicus DnaJ (Hsp40) homolog, subfamily B, member 2 (Dnajb2), mRNA [NM_001109541]                                                                                 | 10,351 |
| RGD1307071 | Uncharacterized protein [Source:UniProtKB/TrEMBL;Acc:D4A8C1] [ENSRNOT00000036527]                                                                                           | 10,351 |
| Smarcal1   | Rattus norvegicus Swi/SNF related matrix associated, actin dependent regulator of chromatin, subfamily a-like 1 (Smarcal1), mRNA [NM_001108222]                             | 10,350 |
| 0          | PREDICTED: Rattus norvegicus similar to glyceraldehyde-3-phosphate dehydrogenase (RGD1560797), mRNA [XM_001076325]                                                          | 10,350 |
| Arsa       | Rattus norvegicus arylsulfatase A (Arsa), mRNA [NM_001034933]                                                                                                               | 10,349 |
| 0          | RVL7343 Wackym-Soares normalized rat vestibular cDNA library Rattus norvegicus cDNA 5', mRNA sequence [DV716912]                                                            | 10,349 |
| Cenpa      | Rattus norvegicus centromere protein A (Cenpa), mRNA [NM_001106711]                                                                                                         | 10,346 |
| Hbegf      | Rattus norvegicus heparin-binding EGF-like growth factor (Hbegf), mRNA [NM_012945]                                                                                          | 10,346 |
| Creb1      | Rattus norvegicus cAMP responsive element binding protein 1 (Creb1), transcript variant A, mRNA [NM_134443]                                                                 | 10,346 |
| Dapk1      | Rattus norvegicus death associated protein kinase 1 (Dapk1), mRNA [NM_001107335]                                                                                            | 10,344 |
| N6amt2     | Rattus norvegicus N-6 adenine-specific DNA methyltransferase 2 (putative) (N6amt2), mRNA [NM_001134990]                                                                     | 10,344 |
| 0          | Uncharacterized protein [Source:UniProtKB/TrEMBL;Acc:D4A9C5] [ENSRNOT00000011365]                                                                                           | 10,344 |
| Rhoc       | Rattus norvegicus ras homolog gene family, member C (Rhoc), mRNA [NM_001106461]                                                                                             | 10,343 |
| LOC690340  | PREDICTED: Rattus norvegicus similar to spermatogenesis associated glutamate (E)-rich protein 4d (LOC690340), mRNA [XM_001074151]                                           | 10,343 |
| Cd82       | Rattus norvegicus Cd82 molecule (Cd82), mRNA [NM_031797]                                                                                                                    | 10,343 |
| Sertad3    | Rattus norvegicus SERTA domain containing 3 (Sertad3), mRNA [NM_001017513]                                                                                                  | 10,342 |
| Scgn       | Rattus norvegicus secretagogin, EF-hand calcium binding protein (Scgn), mRNA [NM_201561]                                                                                    | 10,342 |
| Pklr       | Rattus norvegicus pyruvate kinase, liver and RBC (Pklr), nuclear gene encoding mitochondrial protein, mRNA [NM_012624]                                                      | 10,342 |
| 0          | RVL9296 Wackym-Soares normalized rat vestibular cDNA library Rattus norvegicus cDNA 5', mRNA sequence [DV718677]                                                            | 10,341 |
| 0          | Unknown                                                                                                                                                                     | 10,340 |
| Atp5d      | Rattus norvegicus ATP synthase, H <sup>+</sup> transporting, mitochondrial F1 complex, delta subunit (Atp5d), nuclear gene encoding mitochondrial protein, mRNA [NM_139106] | 10,337 |
| Gdpd4      | PREDICTED: Rattus norvegicus glycerophosphodiester phosphodiesterase domain containing 4 (Gdpd4), mRNA [XM_001059822]                                                       | 10,337 |
| 0          | Unknown                                                                                                                                                                     | 10,336 |
| Cstf1      | Rattus norvegicus cleavage stimulation factor, 3' pre-RNA, subunit 1 (Cstf1), mRNA [NM_001013161]                                                                           | 10,335 |
| Ril        | Rattus norvegicus reversion induced LIM gene (Ril), mRNA [NM_017062]                                                                                                        | 10,335 |
| Zmynd8     | Rattus norvegicus zinc finger, MYND-type containing 8 (Zmynd8), mRNA [NM_001100838]                                                                                         | 10,331 |
| Kif18a     | Rattus norvegicus kinesin family member 18A (Kif18a), mRNA [NM_001137642]                                                                                                   | 10,331 |
| 0          | Unknown                                                                                                                                                                     | 10,330 |
| 0          | Unknown                                                                                                                                                                     | 10,329 |
| 0          | Unknown                                                                                                                                                                     | 10,328 |

|           |                                                                                                                                              |        |
|-----------|----------------------------------------------------------------------------------------------------------------------------------------------|--------|
| Picalm    | Rattus norvegicus phosphatidylinositol binding clathrin assembly protein (Picalm), mRNA [NM_053554]                                          | 10,328 |
| Smchd1    | Uncharacterized protein [Source:UniProtKB/TrEMBL;Acc:D4AAG8] [ENSRNOT00000019359]                                                            | 10,327 |
| Ppp1r12a  | Rattus norvegicus protein phosphatase 1, regulatory (inhibitor) subunit 12A (Ppp1r12a), mRNA [NM_053890]                                     | 10,327 |
| Fech      | Rattus norvegicus ferrochelatase (Fech), nuclear gene encoding mitochondrial protein, mRNA [NM_001108434]                                    | 10,326 |
| Slc9a8    | Rattus norvegicus solute carrier family 9 (sodium/hydrogen exchanger), member 8 (Slc9a8), mRNA [NM_001025281]                                | 10,324 |
| LOC685300 | AGENCOURT_17644684 NIH_MGC_237 Rattus norvegicus cDNA clone IMAGE:7115807 5', mRNA sequence [CK471043]                                       | 10,323 |
| Pou3f3    | Rattus norvegicus POU class 3 homeobox 3 (Pou3f3), mRNA [NM_138837]                                                                          | 10,322 |
| Kif13a    | Rattus norvegicus kinesin family member 13A (Kif13a), mRNA [NM_001107462]                                                                    | 10,321 |
| 0         | Unknown                                                                                                                                      | 10,319 |
| Bin1      | Rattus norvegicus bridging integrator 1 (Bin1), mRNA [NM_053959]                                                                             | 10,319 |
| Fbxo33    | Rattus norvegicus F-box protein 33 (Fbxo33), mRNA [NM_001108023]                                                                             | 10,318 |
| Pet112l   | Uncharacterized protein [Source:UniProtKB/TrEMBL;Acc:D3ZJF6] [ENSRNOT00000057128]                                                            | 10,318 |
| Ngfr      | Rattus norvegicus nerve growth factor receptor (TNFR superfamily, member 16) (Ngfr), mRNA [NM_012610]                                        | 10,317 |
| Bpi       | Rattus norvegicus bactericidal/permeability-increasing protein (Bpi), mRNA [NM_001004079]                                                    | 10,312 |
| Rpl28     | Rattus norvegicus ribosomal protein L28 (Rpl28), mRNA [NM_022697]                                                                            | 10,311 |
| Cpne7     | Rattus norvegicus copine VII (Cpne7), mRNA [NM_001108454]                                                                                    | 10,311 |
| Wsb2      | Rattus norvegicus WD repeat and SOCS box-containing 2 (Wsb2), mRNA [NM_001007616]                                                            | 10,311 |
| Stk4      | Rattus norvegicus serine/threonine kinase 4 (Stk4), mRNA [NM_001107800]                                                                      | 10,307 |
| Tbc1d14   | Rattus norvegicus TBC1 domain family, member 14 (Tbc1d14), transcript variant 1, mRNA [NM_001012152]                                         | 10,307 |
| 0         | Unknown                                                                                                                                      | 10,306 |
| LOC292543 | Rattus norvegicus similar to solute carrier family 7 (cationic amino acid transporter, y+ system), member 3 (LOC292543), mRNA [NM_001025639] | 10,306 |
| 0         | Uncharacterized protein [Source:UniProtKB/TrEMBL;Acc:D4A538] [ENSRNOT00000016240]                                                            | 10,305 |
| 0         | RNA binding motif, single stranded interacting protein Gene [Source:MGI Symbol;Acc:MGI:2444477] [ENSRNOT00000039904]                         | 10,302 |
| Tmem183a  | Rattus norvegicus transmembrane protein 183A (Tmem183a), mRNA [NM_001013871]                                                                 | 10,302 |
| Tmem174   | Rattus norvegicus transmembrane protein 174 (Tmem174), mRNA [NM_001024298]                                                                   | 10,301 |
| 0         | Uncharacterized protein [Source:UniProtKB/TrEMBL;Acc:D4A814] [ENSRNOT00000030906]                                                            | 10,298 |
| Vps13d    | Rattus norvegicus vacuolar protein sorting 13 homolog D (S. cerevisiae) (Vps13d), mRNA [NM_001108006]                                        | 10,295 |
| Golga3    | Rattus norvegicus golgi autoantigen, golgin subfamily a, 3 (Golga3), mRNA [NM_001107847]                                                     | 10,293 |
| LOC681371 | PREDICTED: Rattus norvegicus hypothetical protein LOC681371 (LOC681371), miscRNA [XR_085969]                                                 | 10,292 |
| Olr80     | Rattus norvegicus olfactory receptor 80 (Olr80), mRNA [NM_001001270]                                                                         | 10,292 |
| Tacc2     | Rattus norvegicus transforming, acidic coiled-coil containing protein 2 (Tacc2), transcript variant 1, mRNA [NM_001004415]                   | 10,291 |
| 0         | NADH-ubiquinone oxidoreductase chain 4 [Source:UniProtKB/Swiss-Prot;Acc:P05508] [ENSRNOT00000042928]                                         | 10,291 |
| 0         | GTPase KRasGTPase KRas, N-terminally processed [Source:UniProtKB/Swiss-Prot;Acc:P08644] [ENSRNOT00000012588]                                 | 10,290 |
| Dffa      | Rattus norvegicus DNA fragmentation factor, alpha subunit (Dffa), mRNA [NM_053679]                                                           | 10,289 |

|            |                                                                                                                                                               |        |
|------------|---------------------------------------------------------------------------------------------------------------------------------------------------------------|--------|
| 0          | RNA binding motif protein 4 [Source:RefSeq peptide;Acc:NP_001163955] [ENSRNOT00000054844]                                                                     | 10,285 |
| LOC498122  | Rattus norvegicus similar to CG15908-PA (LOC498122), mRNA [NM_001109058]                                                                                      | 10,285 |
| 0          | Rattus norvegicus similar to glyceraldehyde-3-phosphate dehydrogenase (LOC293458), mRNA [XM_219295]                                                           | 10,285 |
| 0          | Unknown                                                                                                                                                       | 10,284 |
| Txlna      | Rattus norvegicus taxilin alpha (Txlna), mRNA [NM_001127633]                                                                                                  | 10,284 |
| LOC691169  | PREDICTED: Rattus norvegicus hypothetical protein LOC691169 (LOC691169), mRNA [XM_001077081]                                                                  | 10,283 |
| RGD1305713 | Rattus norvegicus similar to RIKEN cDNA 3110040N11 (RGD1305713), mRNA [NM_001024749]                                                                          | 10,283 |
| Ccdc85c    | PREDICTED: Rattus norvegicus similar to CG17265-PA (LOC690965), mRNA [XM_001076332]                                                                           | 10,281 |
| Cp110      | Rattus norvegicus CP110 protein (Cp110), mRNA [NM_001108501]                                                                                                  | 10,280 |
| Pik3ip1    | Rattus norvegicus phosphoinositide-3-kinase interacting protein 1 (Pik3ip1), mRNA [NM_001017453]                                                              | 10,279 |
| LOC689766  | Rattus norvegicus hypothetical protein LOC689766 (LOC689766), mRNA [NM_001109549]                                                                             | 10,272 |
| Polh       | Rattus norvegicus polymerase (DNA directed), eta (Polh), mRNA [NM_001108204]                                                                                  | 10,271 |
| Sema4f     | Rattus norvegicus sema domain, immunoglobulin domain (Ig), transmembrane domain (TM) and short cytoplasmic domain, (semaphorin) 4F (Sema4f), mRNA [NM_019272] | 10,271 |
| Olr1196    | Rattus norvegicus olfactory receptor 1196 (Olr1196), mRNA [NM_001000435]                                                                                      | 10,270 |
| Smc1a      | Rattus norvegicus structural maintenance of chromosomes 1A (Smc1a), mRNA [NM_031683]                                                                          | 10,269 |
| LOC291863  | Rattus norvegicus carboxylesterase-like (LOC291863), mRNA [NM_001013889]                                                                                      | 10,269 |
| Arhgef4    | PREDICTED: Rattus norvegicus Rho guanine nucleotide exchange factor (GEF) 4 (Arhgef4), mRNA [XM_237049]                                                       | 10,268 |
| Ccdc23     | Rattus norvegicus coiled-coil domain containing 23 (Ccdc23), transcript variant 1, mRNA [NM_001038994]                                                        | 10,267 |
| Gmeb2      | Rattus norvegicus glucocorticoid modulatory element binding protein 2 (Gmeb2), mRNA [NM_031803]                                                               | 10,267 |
| Slc25a28   | Rattus norvegicus solute carrier family 25, member 28 (Slc25a28), mRNA [NM_001109515]                                                                         | 10,263 |
| lpo11      | PREDICTED: Rattus norvegicus importin 11 (lpo11), mRNA [XM_002725887]                                                                                         | 10,263 |
| Cstf2t     | Rattus norvegicus cleavage stimulation factor, 3' pre-RNA subunit 2, tau (Cstf2t), mRNA [NM_001107586]                                                        | 10,262 |
| Gas2       | Rattus norvegicus growth arrest-specific 2 (Gas2), mRNA [NM_001127504]                                                                                        | 10,261 |
| 0          | Unknown                                                                                                                                                       | 10,259 |
| Angptl2    | Rattus norvegicus angiopoietin-like 2 (Angptl2), mRNA [NM_133569]                                                                                             | 10,258 |
| Tacc1      | Rattus norvegicus transforming, acidic coiled-coil containing protein 1 (Tacc1), mRNA [NM_001004107]                                                          | 10,258 |
| 0          | E3 ubiquitin-protein ligase PDZRN3 [Source:UniProtKB/Swiss-Prot;Acc:P68907] [ENSRNOT00000008032]                                                              | 10,257 |
| 0          | Unknown                                                                                                                                                       | 10,257 |
| Shisa5     | Rattus norvegicus shisa homolog 5 (Xenopus laevis) (Shisa5), mRNA [NM_001006989]                                                                              | 10,257 |
| RGD1307890 | Rattus norvegicus similar to C1orf25 (RGD1307890), mRNA [NM_001037192]                                                                                        | 10,254 |
| Ang        | Rattus norvegicus angiogenin, ribonuclease, RNase A family, 5 (Ang), mRNA [NM_001012359]                                                                      | 10,252 |
| Kalrn      | Rattus norvegicus kalirin, RhoGEF kinase (Kalrn), mRNA [NM_032062]                                                                                            | 10,251 |



|            |                                                                                                                                                             |               |
|------------|-------------------------------------------------------------------------------------------------------------------------------------------------------------|---------------|
| 0          | Rattus norvegicus similar to glyceraldehyde-3-phosphate dehydrogenase (phosphorylating) (EC 1.2.1.12) - mouse (LOC290634), mRNA [XM_214287]                 | <b>10,251</b> |
| Acss2      | Rattus norvegicus acyl-CoA synthetase short-chain family member 2 (Acss2), mRNA [NM_001107793]                                                              | <b>10,251</b> |
| 0          | Q9ERD6_MOUSE (Q9ERD6) Ral-A exchange factor RalGPS2, partial (28%) [TC597248]                                                                               | <b>10,250</b> |
| Ak2        | Rattus norvegicus adenylate kinase 2 (Ak2), nuclear gene encoding mitochondrial protein, transcript variant 2, mRNA [NM_001033967]                          | <b>10,250</b> |
| RGD1566102 | PREDICTED: Rattus norvegicus RGD1566102 (RGD1566102), mRNA [XM_001056364]                                                                                   | <b>10,249</b> |
| 0          | RCG49325, isoform CRA_bUncharacterized protein [Source:UniProtKB/TrEMBL;Acc:D3ZR95] [ENSRNOT00000025495]                                                    | <b>10,248</b> |
| LOC685406  | Rattus norvegicus LRRGT00062 (LOC685406), mRNA [NM_001047977]                                                                                               | <b>10,248</b> |
| Sdc4       | Rattus norvegicus syndecan 4 (Sdc4), mRNA [NM_012649]                                                                                                       | <b>10,247</b> |
| Myh6       | Rattus norvegicus myosin, heavy chain 6, cardiac muscle, alpha (Myh6), mRNA [NM_017239]                                                                     | <b>10,246</b> |
| Slc6a16    | PREDICTED: Rattus norvegicus solute carrier family 6, member 16 (Slc6a16), mRNA [XM_001080708]                                                              | <b>10,243</b> |
| 0          | Rattus norvegicus Ac1-283 mRNA, complete cds. [AY325224]                                                                                                    | <b>10,243</b> |
| RGD1561246 | PREDICTED: Rattus norvegicus similar to put. precursor MulFN-alpha 5 (RGD1561246), mRNA [XM_001053102]                                                      | <b>10,243</b> |
| 0          | Unknown                                                                                                                                                     | <b>10,243</b> |
| Zfat       | Rattus norvegicus zinc finger and AT hook domain containing (Zfat), mRNA [NM_001134957]                                                                     | <b>10,242</b> |
| Cdkn1a     | Rattus norvegicus cyclin-dependent kinase inhibitor 1A (Cdkn1a), mRNA [NM_080782]                                                                           | <b>10,241</b> |
| Dok6       | Rattus norvegicus docking protein 6 (Dok6), mRNA [NM_001191943]                                                                                             | <b>10,240</b> |
| Aldh3a2    | Rattus norvegicus aldehyde dehydrogenase 3 family, member A2 (Aldh3a2), mRNA [NM_031731]                                                                    | <b>10,240</b> |
| Ube4a      | Rattus norvegicus ubiquitination factor E4A (UFD2 homolog, yeast) (Ube4a), mRNA [NM_207610]                                                                 | <b>10,240</b> |
| Ptk2       | Rattus norvegicus PTK2 protein tyrosine kinase 2 (Ptk2), mRNA [NM_013081]                                                                                   | <b>10,240</b> |
| Timm8a1    | Rattus norvegicus translocase of inner mitochondrial membrane 8 homolog a1 (yeast) (Timm8a1), nuclear gene encoding mitochondrial protein, mRNA [NM_053370] | <b>10,239</b> |
| 0          | Q8TE64_HUMAN (Q8TE64) Pur-gamma B-form, partial (50%) [TC600362]                                                                                            | <b>10,239</b> |
| Galnt13    | Rattus norvegicus UDP-N-acetyl-alpha-D-galactosamine:polypeptide N-acetylgalactosaminyltransferase 13 (GalNAc-T13) (Galnt13), mRNA [NM_199106]              | <b>10,238</b> |
| Spag6      | Rattus norvegicus sperm associated antigen 6 (Spag6), mRNA [NM_001034960]                                                                                   | <b>10,237</b> |
| Lix1       | Rattus norvegicus Lix1 homolog (chicken) (Lix1), mRNA [NM_001106214]                                                                                        | <b>10,236</b> |
| Cerk       | Rattus norvegicus ceramide kinase (Cerk), mRNA [NM_001134861]                                                                                               | <b>10,235</b> |
| Prss8      | Rattus norvegicus protease, serine, 8 (Prss8), mRNA [NM_138836]                                                                                             | <b>10,234</b> |
| 0          | Unknown                                                                                                                                                     | <b>10,232</b> |
| Cidea      | Rattus norvegicus cell death-inducing DFFA-like effector a (Cidea), mRNA [NM_001170467]                                                                     | <b>10,231</b> |
| 0          | Rattus norvegicus, 23 clones, strain BN/SsNHsdMCW RNOR03327639, whole genome shotgun sequence [AABR03128582]                                                | <b>10,231</b> |
| 0          | Unknown                                                                                                                                                     | <b>10,230</b> |
| Reg3a      | Rattus norvegicus regenerating islet-derived 3 alpha (Reg3a), transcript variant 1, mRNA [NM_172077]                                                        | <b>10,227</b> |

|            |                                                                                                                                               |        |
|------------|-----------------------------------------------------------------------------------------------------------------------------------------------|--------|
| LOC679087  | PREDICTED: Rattus norvegicus similar to swan (LOC679087), mRNA [XM_001054639]                                                                 | 10,227 |
| Slc22a5    | Rattus norvegicus solute carrier family 22 (organic cation/carnitine transporter), member 5 (Slc22a5), mRNA [NM_019269]                       | 10,226 |
| Igf1r      | Rattus norvegicus insulin-like growth factor 1 receptor (Igf1r), mRNA [NM_052807]                                                             | 10,225 |
| Zfyve26    | Rattus norvegicus zinc finger, FYVE domain containing 26 (Zfyve26), mRNA [NM_001108038]                                                       | 10,225 |
| 0          | Unknown                                                                                                                                       | 10,225 |
| Spop       | Rattus norvegicus speckle-type POZ protein (Spop), mRNA [NM_001100496]                                                                        | 10,223 |
| Otub2      | Rattus norvegicus OTU domain, ubiquitin aldehyde binding 2 (Otub2), mRNA [NM_001108053]                                                       | 10,223 |
| Etf1       | Rattus norvegicus eukaryotic translation termination factor 1 (Etf1), mRNA [NM_001008344]                                                     | 10,221 |
| 0          | Uncharacterized protein [Source:UniProtKB/TrEMBL;Acc:D3ZAC0] [ENSRNOT00000055179]                                                             | 10,217 |
| Jph2       | Rattus norvegicus junctophilin 2 (Jph2), mRNA [NM_001037974]                                                                                  | 10,216 |
| 0          | KIAA1454-like protein [Source:UniProtKB/TrEMBL;Acc:Q99MF7] [ENSRNOT00000009385]                                                               | 10,216 |
| Arid2      | Uncharacterized protein [Source:UniProtKB/TrEMBL;Acc:D3ZJU0] [ENSRNOT00000006970]                                                             | 10,215 |
| Sco1       | Rattus norvegicus SCO cytochrome oxidase deficient homolog 1 (yeast) (Sco1), nuclear gene encoding mitochondrial protein, mRNA [NM_001173374] | 10,213 |
| Zc3h6      | Rattus norvegicus zinc finger CCCH type containing 6 (Zc3h6), mRNA [NM_001107772]                                                             | 10,213 |
| Tmem220    | Uncharacterized protein [Source:UniProtKB/TrEMBL;Acc:D4A6Z7] [ENSRNOT00000004516]                                                             | 10,210 |
| Pcdhb20    | Rattus norvegicus protocadherin beta 20 (Pcdhb20), mRNA [NM_001109395]                                                                        | 10,210 |
| Rasa1      | Rattus norvegicus RAS protein activator like 1 (GAP1 like) (Rasa1), mRNA [NM_001108335]                                                       | 10,208 |
| Phf2       | Rattus norvegicus putative homeodomain transcription factor 2 (Phf2), mRNA [NM_001106577]                                                     | 10,208 |
| 0          | Uncharacterized protein [Source:UniProtKB/TrEMBL;Acc:D3ZYR2] [ENSRNOT00000020691]                                                             | 10,207 |
| Psat1      | Rattus norvegicus phosphoserine aminotransferase 1 (Psat1), mRNA [NM_198738]                                                                  | 10,206 |
| Prrg1      | Rattus norvegicus proline rich Gla (G-carboxyglutamic acid) 1 (Prrg1), mRNA [NM_001191888]                                                    | 10,206 |
| Mgat3      | Rattus norvegicus mannosyl (beta-1,4-)-glycoprotein beta-1,4-N-acetylglucosaminyltransferase (Mgat3), mRNA [NM_019239]                        | 10,206 |
| Rnf125     | Rattus norvegicus ring finger protein 125 (Rnf125), mRNA [NM_001108424]                                                                       | 10,205 |
| 0          | Uncharacterized protein [Source:UniProtKB/TrEMBL;Acc:D3ZZG9] [ENSRNOT00000054682]                                                             | 10,205 |
| Epha7      | Rattus norvegicus Eph receptor A7 (Epha7), mRNA [NM_134331]                                                                                   | 10,205 |
| Defb9      | Rattus norvegicus defensin beta 9 (Defb9), mRNA [NM_001037509]                                                                                | 10,203 |
| Vom1r59    | Rattus norvegicus vomeronasal 1 receptor 59 (Vom1r59), mRNA [NM_001008944]                                                                    | 10,202 |
| Eif6       | Rattus norvegicus eukaryotic translation initiation factor 6 (Eif6), mRNA [NM_001037352]                                                      | 10,202 |
| Atad5      | PREDICTED: Rattus norvegicus ATPase family, AAA domain containing 5, transcript variant 1 (Atad5), mRNA [XM_001080963]                        | 10,201 |
| RGD1562079 | Rattus norvegicus RGD1562079 (RGD1562079), mRNA [NM_001177687]                                                                                | 10,200 |
| Olr217     | Rattus norvegicus olfactory receptor 217 (Olr217), mRNA [NM_001000199]                                                                        | 10,200 |
| Bhmt       | Rattus norvegicus betaine-homocysteine methyltransferase (Bhmt), mRNA [NM_030850]                                                             | 10,199 |
| Ccdc106    | Uncharacterized protein [Source:UniProtKB/TrEMBL;Acc:D4AAV8] [ENSRNOT00000021613]                                                             | 10,199 |

|            |                                                                                                                                             |        |
|------------|---------------------------------------------------------------------------------------------------------------------------------------------|--------|
| Fstl3      | Rattus norvegicus follistatin-like 3 (secreted glycoprotein) (Fstl3), mRNA [NM_053629]                                                      | 10,198 |
| Rbck1      | Rattus norvegicus RanBP-type and C3HC4-type zinc finger containing 1 (Rbck1), mRNA [NM_021764]                                              | 10,198 |
| Pfkl       | Rattus norvegicus phosphofructokinase, liver (Pfkl), mRNA [NM_013190]                                                                       | 10,196 |
| Drd2       | Rattus norvegicus dopamine receptor D2 (Drd2), mRNA [NM_012547]                                                                             | 10,196 |
| Flna       | Rattus norvegicus filamin A, alpha (Flna), mRNA [NM_001134599]                                                                              | 10,195 |
| Dmrt2      | Rattus norvegicus doublesex and mab-3 related transcription factor 2 (Dmrt2), mRNA [NM_001107597]                                           | 10,191 |
| 0          | Rattus norvegicus similar to glyceraldehyde-3-phosphate dehydrogenase (phosphorylating) (EC 1.2.1.12) - mouse (LOC311475), mRNA [XM_230709] | 10,189 |
| 0          | Unknown                                                                                                                                     | 10,187 |
| Kcnj9      | Rattus norvegicus potassium inwardly-rectifying channel, subfamily J, member 9 (Kcnj9), mRNA [NM_053834]                                    | 10,187 |
| LOC501308  | PREDICTED: Rattus norvegicus hypothetical gene supported by BC059164 (LOC501308), mRNA [XM_576721]                                          | 10,187 |
| Tmem132c   | PREDICTED: Rattus norvegicus transmembrane protein 132C (Tmem132c), mRNA [XM_002724836]                                                     | 10,183 |
| Trpm8      | Rattus norvegicus transient receptor potential cation channel, subfamily M, member 8 (Trpm8), mRNA [NM_134371]                              | 10,182 |
| Peg12      | Rattus norvegicus paternally expressed 12 (Peg12), mRNA [NM_001170562]                                                                      | 10,182 |
| Oscar      | Rattus norvegicus osteoclast associated, immunoglobulin-like receptor (Oscar), mRNA [NM_001184973]                                          | 10,182 |
| RGD1307749 | Rattus norvegicus similar to RIKEN cDNA 1600013K19 (RGD1307749), mRNA [NM_001106759]                                                        | 10,181 |
| RGD1565616 | Rattus norvegicus RGD1565616 (RGD1565616), mRNA [NM_001109206]                                                                              | 10,180 |
| Glce       | PREDICTED: Rattus norvegicus glucuronic acid epimerase (Glce), mRNA [XM_343404]                                                             | 10,180 |
| 0          | Glutamate receptor subunit GluR1 [Source:UniProtKB/TrEMBL;Acc:Q924I5] [ENSRNOT00000003279]                                                  | 10,180 |
| Fam38b     | PREDICTED: Rattus norvegicus similar to CG8486-PA, isoform A (LOC682889), mRNA [XM_001063568]                                               | 10,179 |
| Ccdc115    | Rattus norvegicus coiled-coil domain containing 115 (Ccdc115), mRNA [NM_001108793]                                                          | 10,179 |
| Erlin2     | Rattus norvegicus ER lipid raft associated 2 (Erlin2), mRNA [NM_001106088]                                                                  | 10,178 |
| Tmem127    | Rattus norvegicus transmembrane protein 127 (Tmem127), mRNA [NM_001100978]                                                                  | 10,178 |
| Prpf4      | Rattus norvegicus PRP4 pre-mRNA processing factor 4 homolog (yeast) (Prpf4), mRNA [NM_001106659]                                            | 10,178 |
| Bcl2       | Rattus norvegicus B-cell CLL/lymphoma 2 (Bcl2), nuclear gene encoding mitochondrial protein, mRNA [NM_016993]                               | 10,177 |
| Chuk       | Rattus norvegicus conserved helix-loop-helix ubiquitous kinase (Chuk), mRNA [NM_001107588]                                                  | 10,177 |
| L2hgdh     | Rattus norvegicus L-2-hydroxyglutarate dehydrogenase (L2hgdh), nuclear gene encoding mitochondrial protein, mRNA [NM_001108028]             | 10,177 |
| 0          | Q448P6_SOLUS (Q448P6) Protein kinase precursor, partial (3%) [TC606896]                                                                     | 10,175 |
| 0          | Unknown                                                                                                                                     | 10,172 |
| 0          | Unknown                                                                                                                                     | 10,171 |
| 0          | Unknown                                                                                                                                     | 10,171 |
| 0          | Unknown                                                                                                                                     | 10,167 |
| Fam101a    | Rattus norvegicus family with sequence similarity 101, member A (Fam101a), mRNA [NM_001109547]                                              | 10,166 |
| 0          | Rattus norvegicus similar to ribosomal protein L23a (LOC297884), mRNA [XM_232762]                                                           | 10,166 |

|            |                                                                                                                                            |               |
|------------|--------------------------------------------------------------------------------------------------------------------------------------------|---------------|
| Sh3tc2     | Sh3tc2 protein [Source:UniProtKB/TrEMBL;Acc:Q5EB84] [ENSRNOT00000026174]                                                                   | <b>10,165</b> |
| Ndr3       | Rattus norvegicus N-myc downstream regulated gene 3 (Ndr3), mRNA [NM_001013923]                                                            | <b>10,165</b> |
| 0          | RNCAI18 carbonic anhydrase II {Rattus norvegicus} (exp=-1; wgp=0; cg=0), partial (32%) [TC633165]                                          | <b>10,164</b> |
| Nod1       | Rattus norvegicus nucleotide-binding oligomerization domain containing 1 (Nod1), mRNA [NM_001109236]                                       | <b>10,164</b> |
| Hadh       | Rattus norvegicus hydroxyacyl-Coenzyme A dehydrogenase (Hadh), nuclear gene encoding mitochondrial protein, mRNA [NM_057186]               | <b>10,163</b> |
| Vwa5b2     | Rattus norvegicus von Willebrand factor A domain containing 5B2 (Vwa5b2), mRNA [NM_001134535]                                              | <b>10,163</b> |
| LOC367117  | Rattus norvegicus similar to RIKEN cDNA 2900055D03 (LOC367117), mRNA [NM_001047919]                                                        | <b>10,163</b> |
| 0          | Glyceraldehyde-3-phosphate dehydrogenase [Source:UniProtKB/TrEMBL;Acc:D4A3W5] [ENSRNOT00000036706]                                         | <b>10,162</b> |
| 40787      | Rattus norvegicus septin 11 (Sept11), mRNA [NM_001107208]                                                                                  | <b>10,162</b> |
| Rcn1       | Rattus norvegicus reticulocalbin 1, EF-hand calcium binding domain (Rcn1), mRNA [NM_001108586]                                             | <b>10,161</b> |
| 0          | Unknown                                                                                                                                    | <b>10,161</b> |
| Ext2       | Rattus norvegicus exostoses (multiple) 2 (Ext2), mRNA [NM_001107751]                                                                       | <b>10,161</b> |
| 0          | Unknown                                                                                                                                    | <b>10,160</b> |
| Mllt3      | Rattus norvegicus myeloid/lymphoid or mixed-lineage leukemia (trithorax homolog, Drosophila); translocated to, 3 (Mllt3), mRNA [NM_053718] | <b>10,159</b> |
| Nup43      | Rattus norvegicus nucleoporin 43 (Nup43), mRNA [NM_001128191]                                                                              | <b>10,156</b> |
| LOC303448  | Rattus norvegicus similar to glyceraldehyde-3-phosphate dehydrogenase (LOC303448), mRNA [NM_001037190]                                     | <b>10,153</b> |
| Srrp       | Rattus norvegicus serine-arginine repressor protein (Srrp), mRNA [NM_001135711]                                                            | <b>10,152</b> |
| Gylt1b     | Rattus norvegicus glycosyltransferase-like 1B (Gylt1b), mRNA [NM_199107]                                                                   | <b>10,150</b> |
| Pdzd8      | Rattus norvegicus PDZ domain containing 8 (Pdzd8), mRNA [NM_001107446]                                                                     | <b>10,148</b> |
| Pphln1     | Rattus norvegicus periphilin 1 (Pphln1), mRNA [NM_001108992]                                                                               | <b>10,147</b> |
| Eif5       | Rattus norvegicus eukaryotic translation initiation factor 5 (Eif5), mRNA [NM_020075]                                                      | <b>10,147</b> |
| Rxra       | Rattus norvegicus retinoid X receptor alpha (Rxra), mRNA [NM_012805]                                                                       | <b>10,143</b> |
| 0          | Q43UY0_SOLUS (Q43UY0) Virulence factor MVIN-like, partial (4%) [TC643072]                                                                  | <b>10,143</b> |
| Nlk        | Rattus norvegicus nemo like kinase (Nlk), mRNA [NM_001191924]                                                                              | <b>10,142</b> |
| Ces5a      | Rattus norvegicus carboxylesterase 5A (Ces5a), mRNA [NM_001012056]                                                                         | <b>10,142</b> |
| Enoph1     | Rattus norvegicus enolase-phosphatase 1 (Enoph1), mRNA [NM_001009391]                                                                      | <b>10,141</b> |
| RGD1560873 | PREDICTED: Rattus norvegicus similar to RIKEN cDNA E230015L20 gene (RGD1560873), miscRNA [XR_085636]                                       | <b>10,140</b> |
| Dnajc6     | Rattus norvegicus DnaJ (Hsp40) homolog, subfamily C, member 6 (Dnajc6), mRNA [NM_001107949]                                                | <b>10,139</b> |
| 0          | Unknown                                                                                                                                    | <b>10,138</b> |
| Bst2       | Rattus norvegicus bone marrow stromal cell antigen 2 (Bst2), mRNA [NM_198134]                                                              | <b>10,136</b> |
| Nrip1      | Rattus norvegicus nuclear receptor interacting protein 1 (Nrip1), mRNA [NM_001100560]                                                      | <b>10,135</b> |
| 0          | Unknown                                                                                                                                    | <b>10,134</b> |
| Arid4a     | Rattus norvegicus AT rich interactive domain 4A (Rbp1 like) (Arid4a), mRNA [NM_001108029]                                                  | <b>10,133</b> |
| 0          | Unknown                                                                                                                                    | <b>10,132</b> |

|              |                                                                                                                                                     |        |
|--------------|-----------------------------------------------------------------------------------------------------------------------------------------------------|--------|
| Rad9b        | Rattus norvegicus RAD9 homolog B ( <i>S. cerevisiae</i> ) (Rad9b), mRNA [NM_001030042]                                                              | 10,132 |
| 0            | Unknown                                                                                                                                             | 10,130 |
| Tsc22d1      | Rattus norvegicus TSC22 domain family, member 1 (Tsc22d1), transcript variant 2, mRNA [NM_013043]                                                   | 10,130 |
| Zbtb5        | Rattus norvegicus zinc finger and BTB domain containing 5 (Zbtb5), mRNA [NM_001106657]                                                              | 10,129 |
| 0            | Unknown                                                                                                                                             | 10,127 |
| Mocs2        | Rattus norvegicus molybdenum cofactor synthesis 2 (Mocs2), transcript variant 2, mRNA [NM_001007633]                                                | 10,127 |
| Rab18        | Rattus norvegicus RAB18, member RAS oncogene family (Rab18), mRNA [NM_001012468]                                                                    | 10,123 |
| Erf          | Rattus norvegicus Ets2 repressor factor (Erf), mRNA [NM_001170335]                                                                                  | 10,120 |
| Ttc9b        | Rattus norvegicus tetratricopeptide repeat domain 9B (Ttc9b), mRNA [NM_001108478]                                                                   | 10,120 |
| 0            | Rattus norvegicus similar to cell division cycle associated 3; gene rich cluster, C8 gene; trigger of mitotic entry 1 (LOC316373), mRNA [XM_237105] | 10,120 |
| 0            | Uncharacterized protein [Source:UniProtKB/TrEMBL;Acc:D3ZRC6] [ENSRNOT00000050943]                                                                   | 10,117 |
| Ppp2ca       | Rattus norvegicus protein phosphatase 2, catalytic subunit, alpha isoform (Ppp2ca), mRNA [NM_017039]                                                | 10,116 |
| 0            | Uncharacterized protein [Source:UniProtKB/TrEMBL;Acc:D3ZQX9] [ENSRNOT00000027019]                                                                   | 10,116 |
| 0            | Q6TXI1_RAT (Q6TXI1) LRRGT00018, partial (5%) [TC597668]                                                                                             | 10,114 |
| Lce1d        | Uncharacterized protein [Source:UniProtKB/TrEMBL;Acc:D3ZFL2] [ENSRNOT00000012464]                                                                   | 10,110 |
| Sptlc2       | Rattus norvegicus serine palmitoyltransferase, long chain base subunit 2 (Sptlc2), mRNA [NM_001037097]                                              | 10,109 |
| 0            | Unknown                                                                                                                                             | 10,109 |
| 0            | Exportin 7, isoform CRA_aUncharacterized protein [Source:UniProtKB/TrEMBL;Acc:D3ZBB4] [ENSRNOT00000058431]                                          | 10,108 |
| RGD1563273   | Rattus norvegicus similar to hypothetical protein 9630041N07 (RGD1563273), mRNA [NM_001134600]                                                      | 10,108 |
| Dnah10       | PREDICTED: Rattus norvegicus dynein, axonemal, heavy polypeptide 10 (Dnah10), mRNA [XM_001078937]                                                   | 10,108 |
| Slc41a3      | Rattus norvegicus solute carrier family 41, member 3 (Slc41a3), mRNA [NM_001037492]                                                                 | 10,104 |
| 0            | Rattus norvegicus similar to olfactory receptor MOR26-1 (LOC293253), mRNA [XM_219179]                                                               | 10,104 |
| Kif3a        | Rattus norvegicus kinesin family member 3a (Kif3a), mRNA [NM_053377]                                                                                | 10,101 |
| Cdh5         | Rattus norvegicus cadherin 5 (Cdh5), mRNA [NM_001107407]                                                                                            | 10,101 |
| Grem1        | Rattus norvegicus gremlin 1, cysteine knot superfamily, homolog ( <i>Xenopus laevis</i> ) (Grem1), mRNA [NM_019282]                                 | 10,100 |
| 0            | Unknown                                                                                                                                             | 10,100 |
| LOC100360315 | PREDICTED: Rattus norvegicus spermatogenesis associated glutamate (E)-rich protein 4e-like (LOC100360315), mRNA [XM_002730116]                      | 10,100 |
| LOC685046    | Rattus norvegicus hypothetical protein LOC685046 (LOC685046), mRNA [NM_001109453]                                                                   | 10,098 |
| 0            | AW920953 EST352257 Rat gene index, normalized rat, norvegicus, Bento Soares Rattus norvegicus cDNA clone RGIHK22 5' end, mRNA sequence [AW920953]   | 10,098 |
| Syn2         | Rattus norvegicus synapsin II (Syn2), transcript variant 2, mRNA [NM_019159]                                                                        | 10,097 |
| Gstm2        | Rattus norvegicus glutathione S-transferase mu 2 (Gstm2), mRNA [NM_177426]                                                                          | 10,097 |
| RGD1561728   | Rattus norvegicus similar to high mobility group protein (LOC307239), mRNA [XM_225740]                                                              | 10,096 |

|              |                                                                                                                         |        |
|--------------|-------------------------------------------------------------------------------------------------------------------------|--------|
| RGD1311186   | Rattus norvegicus similar to RIKEN cDNA 1810014F10 gene (RGD1311186), mRNA [NM_001106310]                               | 10,096 |
| 0            | Uncharacterized protein [Source:UniProtKB/TrEMBL;Acc:D3ZE13] [ENSRNOT00000027984]                                       | 10,095 |
| RGD1563564   | PREDICTED: Rattus norvegicus similar to GTP-binding protein NGB (RGD1563564), mRNA [XM_002728505]                       | 10,095 |
| Nat11        | Rattus norvegicus N-acetyltransferase 11 (Nat11), mRNA [NM_001108518]                                                   | 10,094 |
| Ephx2        | Rattus norvegicus epoxide hydrolase 2, cytoplasmic (Ephx2), mRNA [NM_022936]                                            | 10,093 |
| LOC100363350 | Uncharacterized protein [Source:UniProtKB/TrEMBL;Acc:D4A1D7] [ENSRNOT00000037353]                                       | 10,093 |
| Pcdhb7       | Protocadherin-T3 [Source:UniProtKB/TrEMBL;Acc:Q9JIU3] [ENSRNOT00000027188]                                              | 10,092 |
| Cables1      | Rattus norvegicus Cdk5 and Abl enzyme substrate 1 (Cables1), mRNA [NM_001107404]                                        | 10,091 |
| Baz1b        | Rattus norvegicus bromodomain adjacent to zinc finger domain, 1B (Baz1b), mRNA [NM_001191916]                           | 10,090 |
| 38777        | PREDICTED: Rattus norvegicus membrane-associated ring finger (C3HC4) 6 (March6), mRNA [XM_215517]                       | 10,089 |
| St18         | Rattus norvegicus suppression of tumorigenicity 18 (St18), mRNA [NM_153310]                                             | 10,089 |
| Dctn6        | Rattus norvegicus dynactin 6 (Dctn6), mRNA [NM_001106085]                                                               | 10,086 |
| 0            | Ptpn3 protein [Source:UniProtKB/TrEMBL;Acc:Q562B7] [ENSRNOT00000015276]                                                 | 10,085 |
| LOC680813    | PREDICTED: Rattus norvegicus hypothetical protein LOC680813 (LOC680813), partial mRNA [XM_001058991]                    | 10,084 |
| Otud4        | Rattus norvegicus OTU domain containing 4 (Otud4), mRNA [NM_001191700]                                                  | 10,083 |
| 0            | Uncharacterized protein [Source:UniProtKB/TrEMBL;Acc:D3ZXK4] [ENSRNOT00000025560]                                       | 10,083 |
| Lgr4         | Rattus norvegicus leucine-rich repeat-containing G protein-coupled receptor 4 (Lgr4), mRNA [NM_173328]                  | 10,083 |
| Gabrg2       | Rattus norvegicus gamma-aminobutyric acid (GABA) A receptor, gamma 2 (Gabrg2), mRNA [NM_183327]                         | 10,082 |
| Dpcd         | Rattus norvegicus deleted in primary ciliary dyskinesia (Dpcd), mRNA [NM_001013905]                                     | 10,080 |
| Car11        | Rattus norvegicus carbonic anhydrase 11 (Car11), mRNA [NM_175708]                                                       | 10,080 |
| Akap5        | Rattus norvegicus A kinase (PRKA) anchor protein 5 (Akap5), mRNA [NM_133515]                                            | 10,080 |
| Rtn4rl1      | Rattus norvegicus reticulon 4 receptor-like 1 (Rtn4rl1), mRNA [NM_181377]                                               | 10,079 |
| Glit25d1     | Rattus norvegicus glycosyltransferase 25 domain containing 1 (Glit25d1), mRNA [NM_001106067]                            | 10,078 |
| LOC680377    | Uncharacterized protein [Source:UniProtKB/TrEMBL;Acc:D3ZLL4] [ENSRNOT00000047918]                                       | 10,078 |
| 0            | Unknown                                                                                                                 | 10,078 |
| Gypc         | Rattus norvegicus glycophorin C (Gerbich blood group) (Gypc), mRNA [NM_001013233]                                       | 10,076 |
| Hdac1        | Rattus norvegicus histone deacetylase 1 (Hdac1), mRNA [NM_001025409]                                                    | 10,076 |
| Fgfr2        | Rattus norvegicus fibroblast growth factor receptor 2 (Fgfr2), transcript variant a, mRNA [NM_012712]                   | 10,074 |
| G3bp1        | Rattus norvegicus GTPase activating protein (SH3 domain) binding protein 1 (G3bp1), mRNA [NM_133565]                    | 10,074 |
| Skp2         | Rattus norvegicus S-phase kinase-associated protein 2 (p45) (Skp2), mRNA [NM_001106416]                                 | 10,073 |
| Ppia         | Rattus norvegicus peptidylprolyl isomerase A (cyclophilin A) (Ppia), mRNA [NM_017101]                                   | 10,073 |
| Grasp        | Rattus norvegicus GRP1 (general receptor for phosphoinositides 1)-associated scaffold protein (Grasp), mRNA [NM_138894] | 10,069 |
| Hisppd2a     | Rattus norvegicus histidine acid phosphatase domain containing 2A (Hisppd2a), mRNA [NM_001080783]                       | 10,067 |
| 0            | Unknown                                                                                                                 | 10,066 |

|            |                                                                                                                      |               |
|------------|----------------------------------------------------------------------------------------------------------------------|---------------|
| 0          | Unknown                                                                                                              | <b>10,059</b> |
| 0          | Radial spokehead-like 2 (Predicted)Uncharacterized protein [Source:UniProtKB/TrEMBL;Acc:D3ZP42] [ENSRNOT00000068451] | <b>10,059</b> |
| Ltc4s      | Rattus norvegicus leukotriene C4 synthase (Ltc4s), mRNA [NM_053639]                                                  | <b>10,057</b> |
| Rnf160     | Rattus norvegicus ring finger protein 160 (Rnf160), mRNA [NM_001024235]                                              | <b>10,057</b> |
| LOC686860  | PREDICTED: Rattus norvegicus similar to RT1 class I, CE15 (LOC686860), partial mRNA [XM_001076061]                   | <b>10,056</b> |
| Tnfrsf19   | Rattus norvegicus tumor necrosis factor receptor superfamily, member 19 (Tnfrsf19), mRNA [NM_001044229]              | <b>10,054</b> |
| Rsrc1      | Rattus norvegicus arginine/serine-rich coiled-coil 1 (Rsrc1), mRNA [NM_001014172]                                    | <b>10,054</b> |
| 0          | Unknown                                                                                                              | <b>10,052</b> |
| 0          | Unknown                                                                                                              | <b>10,052</b> |
| Park2      | Rattus norvegicus Parkinson disease (autosomal recessive, juvenile) 2, parkin (Park2), mRNA [NM_020093]              | <b>10,051</b> |
| RGD1305422 | Rattus norvegicus similar to mKIAA0226 protein (LOC303885), mRNA [XM_221382]                                         | <b>10,051</b> |
| Klhdc7b    | PREDICTED: Rattus norvegicus kelch domain containing 7B (Klhdc7b), mRNA [XM_001055129]                               | <b>10,048</b> |
| Mdh1b      | Rattus norvegicus malate dehydrogenase 1B, NAD (soluble) (Mdh1b), mRNA [NM_001108221]                                | <b>10,045</b> |
| Nrg2       | Rattus norvegicus neuregulin 2 (Nrg2), mRNA [NM_001136151]                                                           | <b>10,044</b> |
| Dnajc17    | Rattus norvegicus DnaJ (Hsp40) homolog, subfamily C, member 17 (Dnajc17), mRNA [NM_001191740]                        | <b>10,043</b> |
| Eraf       | Rattus norvegicus erythroid associated factor (Eraf), mRNA [NM_001106299]                                            | <b>10,040</b> |
| 0          | Uncharacterized protein [Source:UniProtKB/TrEMBL;Acc:D3ZCX4] [ENSRNOT00000008851]                                    | <b>10,038</b> |
| Nsun5      | Rattus norvegicus NOL1/NOP2/Sun domain family, member 5 (Nsun5), mRNA [NM_001191593]                                 | <b>10,037</b> |
| Cyp4a2     | Rattus norvegicus cytochrome P450, family 4, subfamily a, polypeptide 2 (Cyp4a2), mRNA [NM_001044770]                | <b>10,036</b> |
| 0          | Uncharacterized protein [Source:UniProtKB/TrEMBL;Acc:D3ZW51] [ENSRNOT00000040758]                                    | <b>10,035</b> |
| Cbx2       | Rattus norvegicus chromobox homolog 2 (Pc class homolog, Drosophila) (Cbx2), mRNA [NM_001107071]                     | <b>10,035</b> |
| Col5a1     | Rattus norvegicus collagen, type V, alpha 1 (Col5a1), mRNA [NM_134452]                                               | <b>10,035</b> |
| Pou5f1     | Rattus norvegicus POU class 5 homeobox 1 (Pou5f1), mRNA [NM_001009178]                                               | <b>10,035</b> |
| Fcho1      | Rattus norvegicus FCH domain only 1 (Fcho1), mRNA [NM_001106069]                                                     | <b>10,034</b> |
| Fbxl22     | Rattus norvegicus F-box and leucine-rich repeat protein 22 (Fbxl22), mRNA [NM_001108769]                             | <b>10,032</b> |
| Tcte4      | Rattus norvegicus t-complex-associated testis expressed 4 (Tcte4), mRNA [NM_001166303]                               | <b>10,030</b> |
| 0          | Unknown                                                                                                              | <b>10,029</b> |
| Nkrf       | PREDICTED: Rattus norvegicus NFkB repressing factor (Nkrf), mRNA [XM_233308]                                         | <b>10,029</b> |
| LOC361990  | Rattus norvegicus similar to DKFZP547E1010 protein (LOC361990), mRNA [NM_001014175]                                  | <b>10,028</b> |
| Tbc1d2     | Rattus norvegicus TBC1 domain family, member 2 (Tbc1d2), mRNA [NM_001107933]                                         | <b>10,028</b> |
| Garnl4     | Rattus norvegicus GTPase activating Rap/RanGAP domain-like 4 (Garnl4), mRNA [NM_001107019]                           | <b>10,027</b> |
| Eapp       | Rattus norvegicus E2F-associated phosphoprotein (Eapp), transcript variant 2, mRNA [NM_001106729]                    | <b>10,022</b> |
| Kcnd2      | Rattus norvegicus potassium voltage-gated channel, Shal-related subfamily, member 2 (Kcnd2), mRNA [NM_031730]        | <b>10,022</b> |
| Otof       | Otoferlin [Source:UniProtKB/Swiss-Prot;Acc:Q9ERC5] [ENSRNOT00000044278]                                              | <b>10,022</b> |

|           |                                                                                                                                                          |        |
|-----------|----------------------------------------------------------------------------------------------------------------------------------------------------------|--------|
| Ano7      | Rattus norvegicus anoctamin 7 (Ano7), mRNA [NM_001004071]                                                                                                | 10,021 |
| Pcbp1     | Uncharacterized protein [Source:UniProtKB/TrEMBL;Acc:D3ZS68] [ENSRNOT00000023806]                                                                        | 10,020 |
| 0         | Transcriptional regulator ATRX [Source:UniProtKB/Swiss-Prot;Acc:P70486] [ENSRNOT00000033355]                                                             | 10,019 |
| Mtmr11    | Rattus norvegicus myotubularin related protein 11 (Mtmr11), mRNA [NM_001191096]                                                                          | 10,019 |
| Apex1     | Rattus norvegicus APEX nuclease (multifunctional DNA repair enzyme) 1 (Apex1), mRNA [NM_024148]                                                          | 10,019 |
| Palmd     | Rattus norvegicus palmdelphin (Palmd), mRNA [NM_001025688]                                                                                               | 10,019 |
| Cd53      | Rattus norvegicus Cd53 molecule (Cd53), mRNA [NM_012523]                                                                                                 | 10,018 |
| Clrn2     | Rattus norvegicus clarin 2 (Clrn2), mRNA [NM_001191097]                                                                                                  | 10,018 |
| Nacad     | Rattus norvegicus NAC alpha domain containing (Nacad), mRNA [NM_001100655]                                                                               | 10,014 |
| Timm23    | Rattus norvegicus translocase of inner mitochondrial membrane 23 homolog (yeast) (Timm23), nuclear gene encoding mitochondrial protein, mRNA [NM_019352] | 10,014 |
| Slc12a6   | Rattus norvegicus solute carrier family 12, member 6 (Slc12a6), mRNA [NM_001109630]                                                                      | 10,013 |
| LOC494538 | UI-R-DA0-byo-b-03-0-UI.s1 UI-R-DA0 Rattus norvegicus cDNA clone UI-R-DA0-byo-b-03-0-UI 3', mRNA sequence [BI279486]                                      | 10,011 |
| Clec4f    | Rattus norvegicus C-type lectin domain family 4, member f (Clec4f), mRNA [NM_053753]                                                                     | 10,011 |
| Pgp       | Rattus norvegicus phosphoglycolate phosphatase (Pgp), mRNA [NM_001169152]                                                                                | 10,010 |
| MGC116197 | Rattus norvegicus similar to RIKEN cDNA 1700001E04 (MGC116197), mRNA [NM_001025755]                                                                      | 10,010 |
| Ppp2r5a   | Rattus norvegicus protein phosphatase 2, regulatory subunit B', alpha isoform (Ppp2r5a), mRNA [NM_001107891]                                             | 10,008 |
| Egfl7     | Rattus norvegicus EGF-like-domain, multiple 7 (Egfl7), mRNA [NM_139104]                                                                                  | 10,007 |
| Trak2     | Rattus norvegicus trafficking protein, kinesin binding 2 (Trak2), mRNA [NM_133560]                                                                       | 10,005 |
| 0         | interferon gamma induced GTPase [Source:RefSeq peptide;Acc:NP_001008765] [ENSRNOT00000039335]                                                            | 10,004 |
| Apbb2     | Rattus norvegicus similar to Amyloid beta A4 precursor protein-binding family B member 2 (Fe65-like protein) (LOC305338), mRNA [XM_223399]               | 10,002 |
| 0         | Unknown                                                                                                                                                  | 10,002 |
| Pde4d     | Rattus norvegicus phosphodiesterase 4D, cAMP-specific (phosphodiesterase E3 dunce homolog, Drosophila) (Pde4d), transcript variant 5, mRNA [NM_017032]   | 10,000 |
| Fnbp1l    | Rattus norvegicus formin binding protein 1-like (Fnbp1l), mRNA [NM_001039609]                                                                            | 9,997  |
| Tapbp     | Rattus norvegicus TAP binding protein (Tapbp), mRNA [NM_033098]                                                                                          | 9,997  |
| 0         | Unknown                                                                                                                                                  | 9,996  |
| Car2      | Rattus norvegicus carbonic anhydrase II (Car2), mRNA [NM_019291]                                                                                         | 9,994  |
| Cd83      | Rattus norvegicus CD83 molecule (Cd83), mRNA [NM_001108410]                                                                                              | 9,994  |
| Grid2     | Rattus norvegicus glutamate receptor, ionotropic, delta 2 (Grid2), mRNA [NM_024379]                                                                      | 9,994  |
| Col4a1    | Rattus norvegicus collagen, type IV, alpha 1 (Col4a1), mRNA [NM_001135009]                                                                               | 9,991  |
| Zcchc3    | PREDICTED: Rattus norvegicus zinc finger, CCHC domain containing 3 (Zcchc3), mRNA [XM_001072887]                                                         | 9,990  |
| 0         | Collagen alpha-1(XI) chain [Source:UniProtKB/Swiss-Prot;Acc:P20909] [ENSRNOT00000023693]                                                                 | 9,990  |



|            |                                                                                                                                                     |       |
|------------|-----------------------------------------------------------------------------------------------------------------------------------------------------|-------|
| 0          | PREDICTED: Rattus norvegicus similar to TAF11 RNA polymerase II, TATA box binding protein (TBP)-associated factor (RGD1562272), mRNA [XM_001081219] | 9,989 |
| Olr1738    | Rattus norvegicus olfactory receptor 1738 (Olr1738), mRNA [NM_001006599]                                                                            | 9,988 |
| Tgfbr3     | Rattus norvegicus transforming growth factor, beta receptor III (Tgfbr3), mRNA [NM_017256]                                                          | 9,986 |
| Nsd1       | Rattus norvegicus nuclear receptor binding SET domain protein 1 (Nsd1), mRNA [NM_001107337]                                                         | 9,985 |
| RT1-CE7    | Rattus norvegicus RT1 class I, locus CE7 (RT1-CE7), mRNA [NM_001008845]                                                                             | 9,983 |
| Esrp1      | Rattus norvegicus epithelial splicing regulatory protein 1 (Esrp1), mRNA [NM_001127564]                                                             | 9,983 |
| Stam       | Rattus norvegicus signal transducing adaptor molecule (SH3 domain and ITAM motif) 1 (Stam), mRNA [NM_001109121]                                     | 9,981 |
| LOC690769  | RCG51260, isoform CRA_aUncharacterized protein [Source:UniProtKB/TrEMBL;Acc:D3ZIQ9] [ENSRNOT00000025716]                                            | 9,980 |
| Ktelc1     | Rattus norvegicus KTEL (Lys-Tyr-Glu-Leu) containing 1 (Ktelc1), mRNA [NM_001100652]                                                                 | 9,980 |
| Nr4a2      | Rattus norvegicus nuclear receptor subfamily 4, group A, member 2 (Nr4a2), mRNA [NM_019328]                                                         | 9,980 |
| Stx16      | Rattus norvegicus syntaxin 16 (Stx16), mRNA [NM_001108610]                                                                                          | 9,978 |
| RGD1560166 | PREDICTED: Rattus norvegicus similar to Probable G-protein coupled receptor 62 (hGPCR8) (RGD1560166), mRNA [XM_001073569]                           | 9,977 |
| Gpi        | Rattus norvegicus glucose phosphate isomerase (Gpi), mRNA [NM_207592]                                                                               | 9,975 |
| RGD1564535 | Uncharacterized protein [Source:UniProtKB/TrEMBL;Acc:D3ZL60] [ENSRNOT00000062001]                                                                   | 9,975 |
| Pde3a      | Rattus norvegicus phosphodiesterase 3A, cGMP inhibited (Pde3a), mRNA [NM_017337]                                                                    | 9,974 |
| Hdac4      | PREDICTED: Rattus norvegicus histone deacetylase 4 (Hdac4), mRNA [XM_001067733]                                                                     | 9,974 |
| 0          | PREDICTED: Rattus norvegicus similar to transglutaminase 7 (LOC691932), mRNA [XM_001080162]                                                         | 9,972 |
| Ercc8      | Rattus norvegicus excision repair cross-complementing rodent repair deficiency, complementation group 8 (Ercc8), mRNA [NM_001107650]                | 9,972 |
| 0          | Unknown                                                                                                                                             | 9,970 |
| Cdh20      | Rattus norvegicus cadherin 20 (Cdh20), mRNA [NM_001012748]                                                                                          | 9,970 |
| LOC500035  | Rattus norvegicus hypothetical protein LOC500035 (LOC500035), mRNA [NM_001047955]                                                                   | 9,967 |
| Ddah2      | Rattus norvegicus dimethylarginine dimethylaminohydrolase 2 (Ddah2), transcript variant 1, mRNA [NM_212532]                                         | 9,967 |
| 0          | AHR_RAT (P41738) Aryl hydrocarbon receptor precursor (Ah receptor) (AhR), complete [TC573854]                                                       | 9,964 |
| Dcaf8      | Rattus norvegicus DDB1 and CUL4 associated factor 8 (Dcaf8), mRNA [NM_001014231]                                                                    | 9,963 |
| Ccdc43     | Rattus norvegicus coiled-coil domain containing 43 (Ccdc43), mRNA [NM_001100728]                                                                    | 9,962 |
| RT1-N3     | Rattus norvegicus RT1 class Ib, locus N3 (RT1-N3), mRNA [NM_001008855]                                                                              | 9,961 |
| Sntg1      | Rattus norvegicus syntrophin, gamma 1 (Sntg1), mRNA [NM_001191981]                                                                                  | 9,957 |
| 0          | RCG46688, isoform CRA_aUncharacterized protein [Source:UniProtKB/TrEMBL;Acc:D3ZRP0] [ENSRNOT00000039466]                                            | 9,957 |
| Grik2      | Rattus norvegicus glutamate receptor, ionotropic, kainate 2 (Grik2), mRNA [NM_019309]                                                               | 9,956 |
| 0          | Unknown                                                                                                                                             | 9,954 |
| 0          | Rattus norvegicus similar to 14-3-3 PROTEIN TAU (14-3-3 PROTEIN THETA) (LOC316483), mRNA [XM_237259]                                                | 9,952 |
| 0          | Uncharacterized protein [Source:UniProtKB/TrEMBL;Acc:D3ZKL6] [ENSRNOT00000044160]                                                                   | 9,951 |
| LOC691561  | PREDICTED: Rattus norvegicus hypothetical protein LOC691561 (LOC691561), mRNA [XM_001078835]                                                        | 9,950 |

|           |                                                                                                                                  |              |
|-----------|----------------------------------------------------------------------------------------------------------------------------------|--------------|
| 0         | Rattus norvegicus similar to putative homeobox protein (LOC294473), mRNA [XM_228242]                                             | <b>9,949</b> |
| Bhmt2     | Rattus norvegicus betaine-homocysteine methyltransferase 2 (Bhmt2), mRNA [NM_001014256]                                          | <b>9,943</b> |
| Chrm1     | Rattus norvegicus cholinergic receptor, muscarinic 1 (Chrm1), mRNA [NM_080773]                                                   | <b>9,943</b> |
| Ano10     | Uncharacterized protein [Source:UniProtKB/TrEMBL;Acc:D3ZBU6] [ENSRNOT00000035371]                                                | <b>9,941</b> |
| Ap3d1     | Rattus norvegicus adaptor-related protein complex 3, delta 1 subunit (Ap3d1), mRNA [NM_001100719]                                | <b>9,939</b> |
| Ric8b     | Rattus norvegicus resistance to inhibitors of cholinesterase 8 homolog B (C. elegans) (Ric8b), mRNA [NM_175598]                  | <b>9,939</b> |
| Enpp1     | Rattus norvegicus ectonucleotide pyrophosphatase/phosphodiesterase 1 (Enpp1), mRNA [NM_053535]                                   | <b>9,937</b> |
| 0         | Uncharacterized protein [Source:UniProtKB/TrEMBL;Acc:D3ZVJ1] [ENSRNOT00000068427]                                                | <b>9,935</b> |
| Ankle2    | Rattus norvegicus ankyrin repeat and LEM domain containing 2 (Ankle2), mRNA [NM_001047901]                                       | <b>9,935</b> |
| 0         | Metallothionein 1 [Source:UniProtKB/TrEMBL;Acc:Q7M082] [ENSRNOT00000058957]                                                      | <b>9,934</b> |
| LOC684993 | Rattus norvegicus hypothetical protein LOC684993 (LOC684993), mRNA [NM_001109451]                                                | <b>9,934</b> |
| Trpc5     | Rattus norvegicus transient receptor potential cation channel, subfamily C, member 5 (Trpc5), mRNA [NM_080898]                   | <b>9,932</b> |
| Fam118b   | Rattus norvegicus family with sequence similarity 118, member B (Fam118b), mRNA [NM_001025283]                                   | <b>9,932</b> |
| Zfp46     | Rattus norvegicus zinc finger protein 46 (Zfp46), mRNA [NM_001106691]                                                            | <b>9,931</b> |
| 0         | Uncharacterized protein [Source:UniProtKB/TrEMBL;Acc:D3ZV89] [ENSRNOT00000059958]                                                | <b>9,930</b> |
| Gab2      | Rattus norvegicus GRB2-associated binding protein 2 (Gab2), mRNA [NM_053417]                                                     | <b>9,928</b> |
| Prcc      | Rattus norvegicus papillary renal cell carcinoma (translocation-associated) (Prcc), mRNA [NM_001107700]                          | <b>9,926</b> |
| Atp13a1   | Rattus norvegicus ATPase type 13A1 (Atp13a1), mRNA [NM_001106079]                                                                | <b>9,925</b> |
| 0         | Uncharacterized protein [Source:UniProtKB/TrEMBL;Acc:D3ZBT9] [ENSRNOT00000020886]                                                | <b>9,924</b> |
| Tmem135   | Rattus norvegicus transmembrane protein 135 (Tmem135), mRNA [NM_001013896]                                                       | <b>9,923</b> |
| LOC498145 | Rattus norvegicus similar to RIKEN cDNA 2810453I06 (LOC498145), mRNA [NM_001017485]                                              | <b>9,922</b> |
| 0         | Uncharacterized protein [Source:UniProtKB/TrEMBL;Acc:D3ZKR7] [ENSRNOT00000050021]                                                | <b>9,921</b> |
| 0         | Rattus norvegicus similar to glyceraldehyde-3-phosphate dehydrogenase (LOC315534), mRNA [XM_235981]                              | <b>9,919</b> |
| Mrps17    | Rattus norvegicus mitochondrial ribosomal protein S17 (Mrps17), nuclear gene encoding mitochondrial protein, mRNA [NM_001105923] | <b>9,919</b> |
| 0         | Unknown                                                                                                                          | <b>9,917</b> |
| Trim69    | Rattus norvegicus tripartite motif-containing 69 (Trim69), mRNA [NM_001013160]                                                   | <b>9,915</b> |
| Car1      | Rattus norvegicus carbonic anhydrase 1 (Car1), mRNA [NM_001107660]                                                               | <b>9,914</b> |
| Tsc22d1   | Rattus norvegicus TSC22 domain family, member 1 (Tsc22d1), transcript variant 1, mRNA [NM_001109912]                             | <b>9,912</b> |
| Wfdc10    | Rattus norvegicus WAP four-disulfide core domain 10 (Wfdc10), mRNA [NM_001109461]                                                | <b>9,911</b> |
| Tns3      | PREDICTED: Rattus norvegicus similar to novel protein similar to Tensin Tns (RGD1564174), mRNA [XM_002725003]                    | <b>9,911</b> |
| LOC683516 | PREDICTED: Rattus norvegicus similar to Zinc finger X-linked protein ZXDB (LOC683516), partial mRNA [XM_001066304]               | <b>9,910</b> |
| 0         | BC034115 Creg2 protein {Mus musculus} (exp=-1; wgp=0; cg=0), partial (34%) [TC605666]                                            | <b>9,910</b> |
| Rab27a    | Rattus norvegicus RAB27A, member RAS oncogene family (Rab27a), mRNA [NM_017317]                                                  | <b>9,907</b> |
| LOC680039 | Rattus norvegicus hypothetical protein LOC680039 (LOC680039), mRNA [NM_001109388]                                                | <b>9,907</b> |

|            |                                                                                                                                            |              |
|------------|--------------------------------------------------------------------------------------------------------------------------------------------|--------------|
| Pyroxd2    | Rattus norvegicus pyridine nucleotide-disulphide oxidoreductase domain 2 (Pyroxd2), mRNA [NM_001004261]                                    | <b>9,906</b> |
| Atp2a1     | Rattus norvegicus ATPase, Ca <sup>++</sup> transporting, cardiac muscle, fast twitch 1 (Atp2a1), mRNA [NM_058213]                          | <b>9,906</b> |
| Krt5       | Rattus norvegicus keratin 5 (Krt5), mRNA [NM_183333]                                                                                       | <b>9,904</b> |
| Lpar3      | Rattus norvegicus lysophosphatidic acid receptor 3 (Lpar3), mRNA [NM_023969]                                                               | <b>9,902</b> |
| Alms1      | Rattus norvegicus Alstrom syndrome 1 homolog (human) (Alms1), mRNA [NM_001106604]                                                          | <b>9,902</b> |
| Lzts1      | Rattus norvegicus leucine zipper, putative tumor suppressor 1 (Lzts1), mRNA [NM_153470]                                                    | <b>9,901</b> |
| H2afy      | Rattus norvegicus H2A histone family, member Y (H2afy), mRNA [NM_017182]                                                                   | <b>9,901</b> |
| 0          | Unknown                                                                                                                                    | <b>9,900</b> |
| Snip       | Rattus norvegicus SNAP25-interacting protein (Snip), mRNA [NM_019378]                                                                      | <b>9,900</b> |
| 0          | Unknown                                                                                                                                    | <b>9,897</b> |
| Atad1      | Rattus norvegicus ATPase family, AAA domain containing 1 (Atad1), mRNA [NM_001035002]                                                      | <b>9,897</b> |
| Krba1      | Uncharacterized protein [Source:UniProtKB/TrEMBL;Acc:D3ZKZ3] [ENSRNOT00000043856]                                                          | <b>9,896</b> |
| RGD1311501 | Rattus norvegicus similar to chromosome 9 open reading frame 7 (RGD1311501), mRNA [NM_001106561]                                           | <b>9,895</b> |
| 0          | Rattus norvegicus similar to glyceraldehyde-3-phosphate dehydrogenase (LOC290902), mRNA [XM_225042]                                        | <b>9,895</b> |
| Aldh18a1   | Rattus norvegicus aldehyde dehydrogenase 18 family, member A1 (Aldh18a1), nuclear gene encoding mitochondrial protein, mRNA [NM_001108524] | <b>9,893</b> |
| Tgif1      | Rattus norvegicus TGFB-induced factor homeobox 1 (Tgif1), mRNA [NM_001015020]                                                              | <b>9,891</b> |
| Ly6h       | Rattus norvegicus lymphocyte antigen 6 complex, locus H (Ly6h), mRNA [NM_001134839]                                                        | <b>9,887</b> |
| RGD1560978 | Rattus norvegicus similar to hypothetical protein (RGD1560978), mRNA [NM_001134631]                                                        | <b>9,885</b> |
| Olr310     | Rattus norvegicus olfactory receptor 310 (Olr310), mRNA [NM_001000765]                                                                     | <b>9,885</b> |
| Ecsit      | Rattus norvegicus ECSIT homolog (Drosophila) (Ecsit), nuclear gene encoding mitochondrial protein, mRNA [NM_001006986]                     | <b>9,883</b> |
| LOC688778  | PREDICTED: Rattus norvegicus similar to fatty aldehyde dehydrogenase-like (LOC688778), mRNA [XM_001068253]                                 | <b>9,882</b> |
| RGD1560137 | PREDICTED: Rattus norvegicus similar to expressed sequence AU021034 (RGD1560137), miscRNA [XR_008828]                                      | <b>9,880</b> |
| Slc9a6     | PREDICTED: Rattus norvegicus solute carrier family 9 (sodium/hydrogen exchanger), member 6 (Slc9a6), mRNA [XM_001053956]                   | <b>9,879</b> |
| Try10      | Rattus norvegicus trypsin 10 (Try10), mRNA [NM_001004097]                                                                                  | <b>9,879</b> |
| Tmem110    | Rattus norvegicus transmembrane protein 110 (Tmem110), mRNA [NM_198774]                                                                    | <b>9,879</b> |
| Slc29a2    | Rattus norvegicus solute carrier family 29 (nucleoside transporters), member 2 (Slc29a2), mRNA [NM_031738]                                 | <b>9,878</b> |
| Trappc6a   | Rattus norvegicus trafficking protein particle complex 6A (Trappc6a), mRNA [NM_001109410]                                                  | <b>9,877</b> |
| Scn1a      | Rattus norvegicus sodium channel, voltage-gated, type I, alpha (Scn1a), mRNA [NM_030875]                                                   | <b>9,877</b> |
| Rcctb1     | Rattus norvegicus regulator of chromosome condensation (RCC1) and BTB (POZ) domain containing protein 1 (Rcctb1), mRNA [NM_001108380]      | <b>9,876</b> |
| 0          | LRRGT00061 [Source:UniProtKB/TrEMBL;Acc:Q6TUI3] [ENSRNOT00000050740]                                                                       | <b>9,876</b> |
| Nr1h3      | Rattus norvegicus nuclear receptor subfamily 1, group H, member 3 (Nr1h3), mRNA [NM_031627]                                                | <b>9,874</b> |
| LOC689727  | PREDICTED: Rattus norvegicus hypothetical protein LOC689727 (LOC689727), mRNA [XM_001071797]                                               | <b>9,870</b> |
| LOC686591  | PREDICTED: Rattus norvegicus similar to paraneoplastic antigen MA2 (LOC686591), mRNA [XM_001074878]                                        | <b>9,867</b> |

|            |                                                                                                                                     |       |
|------------|-------------------------------------------------------------------------------------------------------------------------------------|-------|
| Znf644     | Rattus norvegicus zinc finger protein 644 (Znf644), mRNA [NM_001139484]                                                             | 9,866 |
| 0          | Unknown                                                                                                                             | 9,865 |
| Grk4       | Rattus norvegicus G protein-coupled receptor kinase 4 (Grk4), mRNA [NM_022928]                                                      | 9,865 |
| Elac1      | Rattus norvegicus elaC homolog 1 (E. coli) (Elac1), mRNA [NM_001107406]                                                             | 9,864 |
| 0          | Unknown                                                                                                                             | 9,859 |
| Olr769     | Rattus norvegicus olfactory receptor 769 (Olr769), mRNA [NM_001000371]                                                              | 9,858 |
| Akt1       | Rattus norvegicus v-akt murine thymoma viral oncogene homolog 1 (Akt1), mRNA [NM_033230]                                            | 9,858 |
| 0          | Rattus norvegicus similar to RIKEN cDNA 0610012D17 (LOC294368), mRNA [XM_228129]                                                    | 9,857 |
| Sectm1b    | Rattus norvegicus secreted and transmembrane 1B (Sectm1b), mRNA [NM_199082]                                                         | 9,857 |
| RGD1561656 | Rattus norvegicus similar to lorocrin - mouse (LOC364810), mRNA [XM_344647]                                                         | 9,856 |
| Fam169b    | PREDICTED: Rattus norvegicus hypothetical protein LOC680906 (LOC680906), mRNA [XM_001059420]                                        | 9,853 |
| Pcdhb17    | PREDICTED: Rattus norvegicus protocadherin beta 17 (Pcdhb17), mRNA [XM_001065253]                                                   | 9,853 |
| Sdccag3    | Rattus norvegicus serologically defined colon cancer antigen 3 (Sdccag3), mRNA [NM_001013135]                                       | 9,852 |
| 0          | dual specificity phosphatase 14 [Source:RefSeq peptide;Acc:NP_001073362] [ENSRNOT00000043148]                                       | 9,851 |
| 0          | Unknown                                                                                                                             | 9,850 |
| Tusc1      | PREDICTED: Rattus norvegicus tumor suppressor candidate 1 (Tusc1), mRNA [XM_001060960]                                              | 9,849 |
| 0          | Ral GTPase-activating protein subunit alpha-2 [Source:UniProtKB/Swiss-Prot;Acc:P86411] [ENSRNOT00000015414]                         | 9,847 |
| 0          | Unknown                                                                                                                             | 9,847 |
| 0          | Uncharacterized protein [Source:UniProtKB/TrEMBL;Acc:D3ZY99] [ENSRNOT00000033247]                                                   | 9,847 |
| Usp36      | Rattus norvegicus ubiquitin specific peptidase 36 (Usp36), mRNA [NM_001107069]                                                      | 9,847 |
| Itga11     | Rattus norvegicus integrin, alpha 11 (Itga11), mRNA [NM_001108156]                                                                  | 9,846 |
| 0          | Unknown                                                                                                                             | 9,845 |
| Rras2      | Rattus norvegicus related RAS viral (r-ras) oncogene homolog 2 (Rras2), mRNA [NM_001013434]                                         | 9,845 |
| Stam       | Rattus norvegicus signal transducing adaptor molecule (SH3 domain and ITAM motif) 1 (Stam), mRNA [NM_001109121]                     | 9,844 |
| Hsd12      | Rattus norvegicus hydroxysteroid dehydrogenase like 2 (Hsd12), mRNA [NM_001025697]                                                  | 9,840 |
| Ctbp2      | Rattus norvegicus C-terminal binding protein 2 (Ctbp2), mRNA [NM_053335]                                                            | 9,838 |
| 0          | LIM domain only protein 3 [Source:UniProtKB/Swiss-Prot;Acc:Q99MB5] [ENSRNOT00000010623]                                             | 9,836 |
| Laptm4b    | Rattus norvegicus lysosomal protein transmembrane 4 beta (Laptm4b), mRNA [NM_001013174]                                             | 9,833 |
| 0          | PREDICTED: Rattus norvegicus similar to TDPOZ2 (RGD1562545), mRNA [XM_001061198]                                                    | 9,832 |
| 0          | Rattus norvegicus similar to glyceraldehyde-3-phosphate dehydrogenase (LOC290492), mRNA [XM_224528]                                 | 9,832 |
| Taok1      | Rattus norvegicus TAO kinase 1 (Taok1), mRNA [NM_173327]                                                                            | 9,831 |
| Vwc2       | Rattus norvegicus von Willebrand factor C domain containing 2 (Vwc2), mRNA [NM_001109312]                                           | 9,831 |
| Cox4i2     | Rattus norvegicus cytochrome c oxidase subunit IV isoform 2 (Cox4i2), nuclear gene encoding mitochondrial protein, mRNA [NM_053472] | 9,830 |
| 0          | Unknown                                                                                                                             | 9,829 |

|            |                                                                                                                                                                                                                     |       |
|------------|---------------------------------------------------------------------------------------------------------------------------------------------------------------------------------------------------------------------|-------|
| Hcrtr2     | Rattus norvegicus hypocretin (orexin) receptor 2 (Hcrtr2), mRNA [NM_013074]                                                                                                                                         | 9,827 |
| Polr2i     | Rattus norvegicus polymerase (RNA) II (DNA directed) polypeptide I (Polr2i), mRNA [NM_001106244]                                                                                                                    | 9,827 |
| Sv2c       | Rattus norvegicus synaptic vesicle glycoprotein 2c (Sv2c), mRNA [NM_031593]                                                                                                                                         | 9,827 |
| RGD1311378 | Rattus norvegicus similar to RIKEN cDNA 2010011I20 (RGD1311378), mRNA [NM_001106547]                                                                                                                                | 9,825 |
| Dynlt1     | Rattus norvegicus dynein light chain Tctex-type 1 (Dynlt1), mRNA [NM_031318]                                                                                                                                        | 9,824 |
| 0          | Uncharacterized protein [Source:UniProtKB/TrEMBL;Acc:D3Z9J4] [ENSRNOT00000048141]                                                                                                                                   | 9,823 |
| Dhx57      | Rattus norvegicus DEAH (Asp-Glu-Ala-Asp/His) box polypeptide 57 (Dhx57), mRNA [NM_001191907]                                                                                                                        | 9,822 |
| Tspyl1     | Rattus norvegicus TSPY-like 1 (Tspyl1), mRNA [NM_001013033]                                                                                                                                                         | 9,821 |
| 0          | Unknown                                                                                                                                                                                                             | 9,821 |
| Errfi1     | Rattus norvegicus ERBB receptor feedback inhibitor 1 (Errfi1), mRNA [NM_001014071]                                                                                                                                  | 9,820 |
| 0          | cathepsin Q-like 2 [Source:RefSeq peptide;Acc:NP_001002813] [ENSRNOT00000045847]                                                                                                                                    | 9,820 |
| 0          | Uncharacterized protein [Source:UniProtKB/TrEMBL;Acc:D4A3B7] [ENSRNOT00000009262]                                                                                                                                   | 9,820 |
| Scn2b      | Rattus norvegicus sodium channel, voltage-gated, type II, beta (Scn2b), mRNA [NM_012877]                                                                                                                            | 9,820 |
| RGD1564036 | Rattus norvegicus similar to RIKEN cDNA 3010026O09 (RGD1564036), mRNA [NM_001109030]                                                                                                                                | 9,820 |
| Cachd1     | Rattus norvegicus cache domain containing 1 (Cachd1), mRNA [NM_001191758]                                                                                                                                           | 9,820 |
| Ppia       | Rattus norvegicus peptidylprolyl isomerase A (cyclophilin A) (Ppia), mRNA [NM_017101]                                                                                                                               | 9,820 |
| Slc16a10   | Rattus norvegicus solute carrier family 16 (monocarboxylic acid transporters), member 10 (Slc16a10), mRNA [NM_138831]                                                                                               | 9,819 |
| 0          | Q9D2U9_MOUSE (Q9D2U9) Adult male cerebellum cDNA, RIKEN full-length enriched library, clone:1500011O09 product:HISTONE H2B, full insert sequence (Histone 3, H2ba) (Histone protein Hist3h2ba), complete [TC601505] | 9,817 |
| Slc7a6os   | Rattus norvegicus solute carrier family 7, member 6 opposite strand (Slc7a6os), mRNA [NM_139328]                                                                                                                    | 9,816 |
| Hnrnpa3    | Rattus norvegicus heterogeneous nuclear ribonucleoprotein A3 (Hnrnpa3), transcript variant 1, mRNA [NM_001111294]                                                                                                   | 9,816 |
| Dnajc5     | Rattus norvegicus DnaJ (Hsp40) homolog, subfamily C, member 5 (Dnajc5), mRNA [NM_024161]                                                                                                                            | 9,811 |
| 0          | Unknown                                                                                                                                                                                                             | 9,810 |
| MGC94915   | Rattus norvegicus similar to hypothetical protein (MGC94915), mRNA [NM_001007009]                                                                                                                                   | 9,810 |
| 0          | Unknown                                                                                                                                                                                                             | 9,808 |
| Atic       | Rattus norvegicus 5-aminoimidazole-4-carboxamide ribonucleotide formyltransferase/IMP cyclohydrolase (Atic), mRNA [NM_031014]                                                                                       | 9,808 |
| 0          | Unknown                                                                                                                                                                                                             | 9,806 |
| 0          | Putative uncharacterized protein RGD1560252_predictedUncharacterized protein [Source:UniProtKB/TrEMBL;Acc:D4A3Y2] [ENSRNOT00000023411]                                                                              | 9,805 |
| Prrt4      | Rattus norvegicus proline-rich transmembrane protein 4 (Prrt4), mRNA [NM_001109226]                                                                                                                                 | 9,804 |
| Map3k12    | Rattus norvegicus mitogen activated protein kinase kinase kinase 12 (Map3k12), mRNA [NM_013055]                                                                                                                     | 9,803 |
| 0          | Bax inhibitor 1 [Source:UniProtKB/Swiss-Prot;Acc:P55062] [ENSRNOT00000045927]                                                                                                                                       | 9,802 |
| 0          | Unknown                                                                                                                                                                                                             | 9,799 |
| Yif1       | Rattus norvegicus Yip1 interacting factor homolog (S. cerevisiae) (Yif1), mRNA [NM_172017]                                                                                                                          | 9,799 |

|            |                                                                                                                            |              |
|------------|----------------------------------------------------------------------------------------------------------------------------|--------------|
| Pink1      | Rattus norvegicus PTEN induced putative kinase 1 (Pink1), nuclear gene encoding mitochondrial protein, mRNA [NM_001106694] | <b>9,797</b> |
| Znf608     | Rattus norvegicus zinc finger protein 608 (Znf608), mRNA [NM_001107378]                                                    | <b>9,796</b> |
| RGD1561039 | Rattus norvegicus similar to RIKEN cDNA 1700065I17 (RGD1561039), mRNA [NM_001109126]                                       | <b>9,795</b> |
| Olr1468    | Rattus norvegicus olfactory receptor 1468 (Olr1468), mRNA [NM_001000724]                                                   | <b>9,795</b> |
| 0          | Unknown                                                                                                                    | <b>9,794</b> |
| Magi2      | Rattus norvegicus membrane associated guanylate kinase, WW and PDZ domain containing 2 (Magi2), mRNA [NM_053621]           | <b>9,794</b> |
| RGD1308093 | PREDICTED: Rattus norvegicus similar to FLJ00128 protein (RGD1308093), mRNA [XM_001075554]                                 | <b>9,792</b> |
| Heatr3     | Uncharacterized protein [Source:UniProtKB/TrEMBL;Acc:D3ZV81] [ENSRNOT00000020793]                                          | <b>9,790</b> |
| Kchip2     | Rattus norvegicus A-type potassium channel modulatory protein 2 (Kchip2), mRNA [NM_001034005]                              | <b>9,790</b> |
| Pdcd6ip    | Rattus norvegicus programmed cell death 6 interacting protein (Pdcd6ip), mRNA [NM_001029910]                               | <b>9,790</b> |
| RGD1309730 | Rattus norvegicus similar to RIKEN cDNA B230118H07 (RGD1309730), mRNA [NM_001106491]                                       | <b>9,790</b> |
| Tmem209    | Rattus norvegicus transmembrane protein 209 (Tmem209), mRNA [NM_001014055]                                                 | <b>9,789</b> |
| Gabrb3     | Rattus norvegicus gamma-aminobutyric acid (GABA) A receptor, beta 3 (Gabrb3), mRNA [NM_017065]                             | <b>9,789</b> |
| Akirin2    | Rattus norvegicus akirin 2 (Akirin2), mRNA [NM_001039914]                                                                  | <b>9,788</b> |
| St3gal3    | Rattus norvegicus ST3 beta-galactoside alpha-2,3-sialyltransferase 3 (St3gal3), mRNA [NM_031697]                           | <b>9,787</b> |
| LOC685636  | PREDICTED: Rattus norvegicus hypothetical protein LOC685636 (LOC685636), mRNA [XM_001064613]                               | <b>9,785</b> |
| Impa1      | Rattus norvegicus Inositol (myo)-1(or 4)-monophosphatase 1 (Impa1), mRNA [NM_032057]                                       | <b>9,785</b> |
| Setd2      | Rattus norvegicus SET domain containing 2 (Setd2), mRNA [NM_001108189]                                                     | <b>9,782</b> |
| RGD1311783 | Rattus norvegicus similar to RIKEN cDNA 2010012O05 (RGD1311783), mRNA [NM_001134509]                                       | <b>9,781</b> |
| Fam83e     | PREDICTED: Rattus norvegicus family with sequence similarity 83, member E (Fam83e), mRNA [XM_001079852]                    | <b>9,779</b> |
| RGD1562552 | Rattus norvegicus similar to hypothetical protein LOC340061 (RGD1562552), mRNA [NM_001109122]                              | <b>9,779</b> |
| Fanca      | Rattus norvegicus Fanconi anemia, complementation group A (Fanca), mRNA [NM_001108455]                                     | <b>9,779</b> |
| Cdc37      | Rattus norvegicus cell division cycle 37 homolog ( <i>S. cerevisiae</i> ) (Cdc37), mRNA [NM_053743]                        | <b>9,777</b> |
| Lrrc7      | Rattus norvegicus leucine rich repeat containing 7 (Lrrc7), mRNA [NM_057142]                                               | <b>9,776</b> |
| 0          | Unknown                                                                                                                    | <b>9,774</b> |
| lars       | Rattus norvegicus isoleucyl-tRNA synthetase (lars), mRNA [NM_001100572]                                                    | <b>9,773</b> |
| Atg5       | Rattus norvegicus ATG5 autophagy related 5 homolog ( <i>S. cerevisiae</i> ) (Atg5), mRNA [NM_001014250]                    | <b>9,769</b> |
| Crygf      | Rattus norvegicus crystallin, gamma F (Crygf), mRNA [NM_001109557]                                                         | <b>9,769</b> |
| Shc4       | Rattus norvegicus SHC (Src homology 2 domain containing) family, member 4 (Shc4), mRNA [NM_001191065]                      | <b>9,766</b> |
| Chac2      | Rattus norvegicus ChaC, cation transport regulator homolog 2 ( <i>E. coli</i> ) (Chac2), mRNA [NM_001025016]               | <b>9,764</b> |
| Asns       | Rattus norvegicus asparagine synthetase (Asns), mRNA [NM_013079]                                                           | <b>9,763</b> |
| Stat5a     | Rattus norvegicus signal transducer and activator of transcription 5A (Stat5a), mRNA [NM_017064]                           | <b>9,761</b> |
| 0          | Rattus norvegicus TL0AEA9YC09 mRNA sequence. [FQ230424]                                                                    | <b>9,758</b> |
| Fgf17      | Rattus norvegicus fibroblast growth factor 17 (Fgf17), mRNA [NM_019198]                                                    | <b>9,758</b> |

|              |                                                                                                                                                                                        |              |
|--------------|----------------------------------------------------------------------------------------------------------------------------------------------------------------------------------------|--------------|
| Olr875       | Rattus norvegicus olfactory receptor 875 (Olr875), mRNA [NM_001000054]                                                                                                                 | <b>9,757</b> |
| Cog3         | Rattus norvegicus component of oligomeric golgi complex 3 (Cog3), mRNA [NM_001012157]                                                                                                  | <b>9,756</b> |
| 0            | transcription factor Spi-C [Source:RefSeq peptide;Acc:NP_001101550] [ENSRNOT00000007542]                                                                                               | <b>9,755</b> |
| RGD1562024   | Rattus norvegicus RGD1562024 (RGD1562024), mRNA [NM_001113788]                                                                                                                         | <b>9,753</b> |
| Etfdh        | Rattus norvegicus electron-transferring-flavoprotein dehydrogenase (Etfdh), nuclear gene encoding mitochondrial protein, mRNA [NM_198742]                                              | <b>9,753</b> |
| LOC100125362 | Rattus norvegicus hypothetical protein LOC100125362 (LOC100125362), mRNA [NM_001103354]                                                                                                | <b>9,752</b> |
| Crcp         | Rattus norvegicus CGRP receptor component (Crcp), mRNA [NM_053670]                                                                                                                     | <b>9,751</b> |
| Pars2        | Rattus norvegicus prolyl-tRNA synthetase 2, mitochondrial (putative) (Pars2), nuclear gene encoding mitochondrial protein, mRNA [NM_001014064]                                         | <b>9,751</b> |
| Ptpro        | Rattus norvegicus protein tyrosine phosphatase, receptor type, O (Ptpro), mRNA [NM_017336]                                                                                             | <b>9,751</b> |
| LOC502371    | PREDICTED: Rattus norvegicus similar to 40S ribosomal protein S21 (LOC502371), mRNA [XM_001053958]                                                                                     | <b>9,751</b> |
| Shq1         | Rattus norvegicus SHQ1 homolog (S. cerevisiae) (Shq1), mRNA [NM_001134713]                                                                                                             | <b>9,749</b> |
| Ampd1        | Rattus norvegicus adenosine monophosphate deaminase 1 (isoform M) (Ampd1), mRNA [NM_138876]                                                                                            | <b>9,749</b> |
| Cdc34        | Rattus norvegicus cell division cycle 34 homolog (S. cerevisiae) (Cdc34), mRNA [NM_001013103]                                                                                          | <b>9,749</b> |
| Fndc3a       | Rattus norvegicus fibronectin type III domain containing 3a (Fndc3a), mRNA [NM_001107278]                                                                                              | <b>9,749</b> |
| Rnf41        | Rattus norvegicus ring finger protein 41 (Rnf41), mRNA [NM_001012195]                                                                                                                  | <b>9,747</b> |
| Impad1       | Rattus norvegicus inositol monophosphatase domain containing 1 (Impad1), mRNA [NM_001008772]                                                                                           | <b>9,745</b> |
| 0            | Unknown                                                                                                                                                                                | <b>9,744</b> |
| Slc25a16     | Rattus norvegicus solute carrier family 25 (mitochondrial carrier, Graves disease autoantigen), member 16 (Slc25a16), nuclear gene encoding mitochondrial protein, mRNA [NM_001100860] | <b>9,743</b> |
| Fgr          | Rattus norvegicus Gardner-Rasheed feline sarcoma viral (v-fgr) oncogene homolog (Fgr), mRNA [NM_024145]                                                                                | <b>9,743</b> |
| Ensa         | Rattus norvegicus endosulfine alpha (Ensa), transcript variant 1, mRNA [NM_001033974]                                                                                                  | <b>9,742</b> |
| Golga7b      | PREDICTED: Rattus norvegicus golgi autoantigen, golgin subfamily a, 7B (Golga7b), mRNA [XM_001055463]                                                                                  | <b>9,742</b> |
| 0            | Q7VBZ4_PROMA (Q7VBZ4) Diaminopimelate epimerase, partial (5%) [TC594147]                                                                                                               | <b>9,741</b> |
| 0            | Unknown                                                                                                                                                                                | <b>9,739</b> |
| LOC314942    | PREDICTED: Rattus norvegicus similar to CUB and Sushi multiple domains 3 isoform 1, transcript variant 4 (LOC314942), mRNA [XM_001063221]                                              | <b>9,738</b> |
| Hddc2        | Rattus norvegicus HD domain containing 2 (Hddc2), mRNA [NM_001108460]                                                                                                                  | <b>9,738</b> |
| Tex19        | Rattus norvegicus testis expressed 19 (Tex19), mRNA [NM_001109622]                                                                                                                     | <b>9,736</b> |
| Xrn1         | Uncharacterized protein [Source:UniProtKB/TrEMBL;Acc:D4ABN8] [ENSRNOT00000014481]                                                                                                      | <b>9,735</b> |
| LOC687057    | PREDICTED: Rattus norvegicus similar to Calponin-2 (Calponin H2, smooth muscle) (Neutral calponin) (LOC687057), mRNA [XM_001076906]                                                    | <b>9,730</b> |
| Ankrd6       | Rattus norvegicus ankyrin repeat domain 6 (Ankrd6), mRNA [NM_001134969]                                                                                                                | <b>9,730</b> |
| Inpp1        | Rattus norvegicus inositol polyphosphate phosphatase-like 1 (Inpp1), mRNA [NM_022944]                                                                                                  | <b>9,727</b> |
| Mmp28        | Rattus norvegicus matrix metalloproteinase 28 (Mmp28), mRNA [NM_001079888]                                                                                                             | <b>9,725</b> |

|            |                                                                                                                                                            |       |
|------------|------------------------------------------------------------------------------------------------------------------------------------------------------------|-------|
| Prkrir     | Rattus norvegicus protein-kinase, interferon-inducible double stranded RNA dependent inhibitor, repressor of (P58 repressor) (Prkrir), mRNA [NM_001191630] | 9,724 |
| 0          | Rattus norvegicus similar to necdin (LOC292493), mRNA [XM_218132]                                                                                          | 9,724 |
| Dgkb       | Rattus norvegicus diacylglycerol kinase, beta (Dgkb), mRNA [NM_019304]                                                                                     | 9,723 |
| LOC298018  | RCG31985Uncharacterized protein [Source:UniProtKB/TrEMBL;Acc:D4AE08] [ENSRNOT00000014053]                                                                  | 9,723 |
| 0          | Unknown                                                                                                                                                    | 9,723 |
| Gjb4       | Rattus norvegicus gap junction protein, beta 4 (Gjb4), mRNA [NM_053984]                                                                                    | 9,721 |
| Zfp827     | PREDICTED: Rattus norvegicus similar to hypothetical protein (RGD1560620), mRNA [XM_001074445]                                                             | 9,720 |
| Zmat3      | Rattus norvegicus zinc finger, matrin type 3 (Zmat3), mRNA [NM_022548]                                                                                     | 9,718 |
| Tmem184c   | Rattus norvegicus transmembrane protein 184C (Tmem184c), mRNA [NM_178330]                                                                                  | 9,717 |
| 0          | RCG43751Uncharacterized protein [Source:UniProtKB/TrEMBL;Acc:D3ZKG1] [ENSRNOT00000044594]                                                                  | 9,715 |
| 0          | Rattus norvegicus similar to cytoplasmic beta-actin (LOC298169), mRNA [XM_233107]                                                                          | 9,714 |
| Dyrk2      | Rattus norvegicus dual-specificity tyrosine-(Y)-phosphorylation regulated kinase 2 (Dyrk2), mRNA [NM_001108100]                                            | 9,713 |
| Ikbke      | Rattus norvegicus inhibitor of kappa light polypeptide gene enhancer in B-cells, kinase epsilon (Ikbke), mRNA [NM_001108854]                               | 9,713 |
| Spdya      | Rattus norvegicus speedy homolog A (Xenopus laevis) (Spdya), mRNA [NM_138855]                                                                              | 9,712 |
| RGD1562877 | AGENCOURT_31521904 NIH_MGC_238 Rattus norvegicus cDNA clone IMAGE:7456091 5', mRNA sequence [CV103892]                                                     | 9,711 |
| Nrbp       | Rattus norvegicus nuclear receptor binding protein (Nrbp), mRNA [NM_001034997]                                                                             | 9,711 |
| Mcpt8      | Rattus norvegicus mast cell protease 8 (Mcpt8), mRNA [NM_021598]                                                                                           | 9,711 |
| Tmem163    | Rattus norvegicus transmembrane protein 163 (Tmem163), mRNA [NM_001110763]                                                                                 | 9,710 |
| Agxt2l2    | Rattus norvegicus alanine-glyoxylate aminotransferase 2-like 2 (Agxt2l2), mRNA [NM_001128196]                                                              | 9,709 |
| Hs6st3     | PREDICTED: Rattus norvegicus heparan sulfate 6-O-sulfotransferase 3 (Hs6st3), mRNA [XM_344461]                                                             | 9,708 |
| Nxph1      | Rattus norvegicus neurexophilin 1 (Nxph1), mRNA [NM_012994]                                                                                                | 9,700 |
| Retnlg     | Rattus norvegicus resistin-like gamma (Retnlg), mRNA [NM_181625]                                                                                           | 9,697 |
| Elavl3     | Rattus norvegicus ELAV (embryonic lethal, abnormal vision, Drosophila)-like 3 (Hu antigen C) (Elavl3), mRNA [NM_172324]                                    | 9,697 |
| Sntb1      | Rattus norvegicus syntrophin, beta 1 (Sntb1), mRNA [NM_001130542]                                                                                          | 9,697 |
| Atg10      | Rattus norvegicus autophagy-related 10 (S. cerevisiae) (Atg10), mRNA [NM_001109505]                                                                        | 9,696 |
| Cog1       | Rattus norvegicus component of oligomeric golgi complex 1 (Cog1), mRNA [NM_001107062]                                                                      | 9,695 |
| Stk3       | Rattus norvegicus serine/threonine kinase 3 (STE20 homolog, yeast) (Stk3), mRNA [NM_031735]                                                                | 9,693 |
| Gmgs       | Rattus norvegicus GDP-mannose 4, 6-dehydratase (Gmgs), mRNA [NM_001039606]                                                                                 | 9,692 |
| Selt       | Rattus norvegicus selenoprotein T (Selt), mRNA [NM_001014253]                                                                                              | 9,691 |
| 0          | IQ domain-containing protein D [Source:UniProtKB/Swiss-Prot;Acc:Q5XIR6] [ENSRNOT00000063923]                                                               | 9,690 |
| Cacna1b    | Rattus norvegicus calcium channel, voltage-dependent, N type, alpha 1B subunit (Cacna1b), transcript variant 2, mRNA [NM_147141]                           | 9,690 |
| Ptges      | Rattus norvegicus prostaglandin E synthase (Ptges), mRNA [NM_021583]                                                                                       | 9,687 |
| 0          | Uncharacterized protein [Source:UniProtKB/TrEMBL;Acc:D4ACF9] [ENSRNOT00000036989]                                                                          | 9,686 |



|            |                                                                                                                                                    |              |
|------------|----------------------------------------------------------------------------------------------------------------------------------------------------|--------------|
| RGD1562657 | Uncharacterized protein [Source:UniProtKB/TrEMBL;Acc:D3ZVB0] [ENSRNOT00000036185]                                                                  | <b>9,686</b> |
| Adam10     | PREDICTED: Rattus norvegicus ADAM metallopeptidase domain 10 (Adam10), mRNA [XM_001054737]                                                         | <b>9,684</b> |
| RGD1311344 | PREDICTED: Rattus norvegicus similar to RIKEN cDNA 2810039F03 (RGD1311344), miscRNA [XR_007345]                                                    | <b>9,684</b> |
| Mis12      | Rattus norvegicus MIS12, MIND kinetochore complex component, homolog (S. pombe) (Mis12), mRNA [NM_001047972]                                       | <b>9,681</b> |
| 0          | Unknown                                                                                                                                            | <b>9,681</b> |
| Ifitm2     | Rattus norvegicus interferon induced transmembrane protein 2 (Ifitm2), mRNA [NM_030833]                                                            | <b>9,679</b> |
| LOC307974  | Rattus norvegicus similar to dJ1016N21.1 (novel protein (ortholog of Drosophila Pecanex (PCX), similar to KIAA0805)) (LOC307974), mRNA [XM_226603] | <b>9,679</b> |
| Cfp        | Rattus norvegicus complement factor properdin (Cfp), mRNA [NM_001106757]                                                                           | <b>9,678</b> |
| Smarcd3    | Rattus norvegicus SWI/SNF related, matrix associated, actin dependent regulator of chromatin, subfamily d, member 3 (Smarcd3), mRNA [NM_001011966] | <b>9,677</b> |
| Dock1      | Rattus norvegicus dedicator of cyto-kinesis 1 (Dock1), mRNA [NM_001143858]                                                                         | <b>9,677</b> |
| Csnk1d     | Rattus norvegicus casein kinase 1, delta (Csnk1d), mRNA [NM_139060]                                                                                | <b>9,677</b> |
| Edem2      | Rattus norvegicus ER degradation enhancer, mannosidase alpha-like 2 (Edem2), mRNA [NM_001004230]                                                   | <b>9,676</b> |
| Plk5       | Rattus norvegicus polo-like kinase 5 (Plk5), mRNA [NM_001170557]                                                                                   | <b>9,675</b> |
| 0          | Unknown                                                                                                                                            | <b>9,673</b> |
| 0          | Unknown                                                                                                                                            | <b>9,672</b> |
| Abp10      | PREDICTED: Rattus norvegicus annexin V-binding protein ABP-10 (Abp10), mRNA [XM_001060944]                                                         | <b>9,671</b> |
| Fam81a     | Rattus norvegicus family with sequence similarity 81, member A (Fam81a), mRNA [NM_001108163]                                                       | <b>9,671</b> |
| Krtap13-2  | Rattus norvegicus keratin associated protein 13-2 (Krtap13-2), nuclear gene encoding mitochondrial protein, mRNA [NM_001109325]                    | <b>9,671</b> |
| LOC499749  | Rattus norvegicus similar to RIKEN cDNA C430004E15 (LOC499749), mRNA [NM_001024309]                                                                | <b>9,670</b> |
| RGD1306008 | Rattus norvegicus similar to RIKEN cDNA 4930511I11 (RGD1306008), mRNA [NM_001113777]                                                               | <b>9,668</b> |
| Ublcp1     | Rattus norvegicus ubiquitin-like domain containing CTD phosphatase 1 (Ublcp1), mRNA [NM_001014117]                                                 | <b>9,666</b> |
| P4ha1      | Rattus norvegicus prolyl 4-hydroxylase, alpha polypeptide I (P4ha1), mRNA [NM_172062]                                                              | <b>9,666</b> |
| Vegfa      | Rattus norvegicus vascular endothelial growth factor A (Vegfa), transcript variant 3, mRNA [NM_001110334]                                          | <b>9,665</b> |
| Nxt2       | Rattus norvegicus nuclear transport factor 2-like export factor 2 (Nxt2), mRNA [NM_001108120]                                                      | <b>9,665</b> |
| 0          | DNA-directed RNA polymerase I subunit RPA1 [Source:UniProtKB/Swiss-Prot;Acc:O54889] [ENSRNOT00000013417]                                           | <b>9,663</b> |
| Emd        | Rattus norvegicus emerlin (Emd), mRNA [NM_012948]                                                                                                  | <b>9,662</b> |
| Tmem43     | Rattus norvegicus transmembrane protein 43 (Tmem43), mRNA [NM_001007745]                                                                           | <b>9,662</b> |
| Inpp5b     | Rattus norvegicus inositol polyphosphate-5-phosphatase B (Inpp5b), nuclear gene encoding mitochondrial protein, mRNA [NM_001100755]                | <b>9,659</b> |
| Usp11      | Rattus norvegicus ubiquitin specific peptidase 11 (Usp11), mRNA [NM_001008861]                                                                     | <b>9,658</b> |
| Eif2ak2    | Rattus norvegicus eukaryotic translation initiation factor 2-alpha kinase 2 (Eif2ak2), mRNA [NM_019335]                                            | <b>9,655</b> |
| Fez2       | Rattus norvegicus fasciculation and elongation protein zeta 2 (zygin II) (Fez2), mRNA [NM_053600]                                                  | <b>9,653</b> |
| Lgals4     | Rattus norvegicus lectin, galactoside-binding, soluble, 4 (Lgals4), mRNA [NM_012975]                                                               | <b>9,651</b> |

|            |                                                                                                                                                                             |       |
|------------|-----------------------------------------------------------------------------------------------------------------------------------------------------------------------------|-------|
| RGD1564386 | PREDICTED: Rattus norvegicus similar to TDPOZ3 (RGD1564386), mRNA [XM_001074961]                                                                                            | 9,651 |
| 0          | Q99MR2_MOUSE (Q99MR2) EPHB4, partial (63%) [TC591623]                                                                                                                       | 9,650 |
| 0          | Uncharacterized protein [Source:UniProtKB/TrEMBL;Acc:D4A319] [ENSRNOT00000007828]                                                                                           | 9,648 |
| 0          | Unknown                                                                                                                                                                     | 9,648 |
| Rin1       | Rattus norvegicus Ras and Rab interactor 1 (Rin1), mRNA [NM_139038]                                                                                                         | 9,645 |
| 0          | SUMO-conjugating enzyme UBC9 [Source:UniProtKB/Swiss-Prot;Acc:P63281] [ENSRNOT00000024406]                                                                                  | 9,645 |
| Slc14a1    | Rattus norvegicus solute carrier family 14 (urea transporter), member 1 (Slc14a1), mRNA [NM_019346]                                                                         | 9,642 |
| Tekt4      | Rattus norvegicus tektin 4 (Tekt4), mRNA [NM_001013965]                                                                                                                     | 9,641 |
| Nrip1      | Rattus norvegicus nuclear receptor interacting protein 1 (Nrip1), mRNA [NM_001100560]                                                                                       | 9,641 |
| Tcof1      | Rattus norvegicus Treacher Collins-Franceschetti syndrome 1 homolog (human) (Tcof1), mRNA [NM_001106143]                                                                    | 9,639 |
| RGD1305014 | Rattus norvegicus similar to RIKEN cDNA 2310057M21 (RGD1305014), mRNA [NM_001014025]                                                                                        | 9,638 |
| Pmp2       | Rattus norvegicus peripheral myelin protein 2 (Pmp2), mRNA [NM_001109514]                                                                                                   | 9,636 |
| Serpina11  | Rattus norvegicus serine (or cysteine) peptidase inhibitor, clade A (alpha-1 antiproteinase, antitrypsin), member 11 (Serpina11), transcript variant 1, mRNA [NM_001008776] | 9,635 |
| LOC288913  | Rattus norvegicus similar to LEYDIG CELL TUMOR 10 KD PROTEIN (LOC288913), mRNA [NM_198728]                                                                                  | 9,635 |
| 0          | Unknown                                                                                                                                                                     | 9,633 |
| Relt       | Rattus norvegicus RELT tumor necrosis factor receptor (Relt), mRNA [NM_001108495]                                                                                           | 9,633 |
| Vom1r40    | Rattus norvegicus vomeronasal 1 receptor 40 (Vom1r40), mRNA [NM_001008904]                                                                                                  | 9,632 |
| 0          | Unknown                                                                                                                                                                     | 9,629 |
| 0          | Unknown                                                                                                                                                                     | 9,628 |
| Urb2       | Rattus norvegicus URB2 ribosome biogenesis 2 homolog (S. cerevisiae) (Urb2), mRNA [NM_001135708]                                                                            | 9,628 |
| Chchd8     | Rattus norvegicus coiled-coil-helix-coiled-coil-helix domain containing 8 (Chchd8), mRNA [NM_001127655]                                                                     | 9,627 |
| 0          | Unknown                                                                                                                                                                     | 9,625 |
| Foxi2      | Forkhead box protein I2 [Source:UniProtKB/Swiss-Prot;Acc:Q63248] [ENSRNOT00000025569]                                                                                       | 9,625 |
| Tubb3      | Rattus norvegicus tubulin, beta 3 (Tubb3), mRNA [NM_139254]                                                                                                                 | 9,623 |
| Rxrb       | Rattus norvegicus retinoid X receptor beta (Rxrb), mRNA [NM_206849]                                                                                                         | 9,622 |
| Arsa       | arylsulfatase A [Source:RefSeq peptide;Acc:NP_001030105] [ENSRNOT00000017783]                                                                                               | 9,620 |
| 0          | Unknown                                                                                                                                                                     | 9,620 |
| Wdr37      | Rattus norvegicus WD repeat domain 37 (Wdr37), mRNA [NM_001107362]                                                                                                          | 9,619 |
| 0          | Uncharacterized protein [Source:UniProtKB/TrEMBL;Acc:D3ZZX4] [ENSRNOT00000066953]                                                                                           | 9,619 |
| P2ry4      | Rattus norvegicus pyrimidinergic receptor P2Y, G-protein coupled, 4 (P2ry4), mRNA [NM_031680]                                                                               | 9,618 |
| Lrch4      | Rattus norvegicus leucine-rich repeats and calponin homology (CH) domain containing 4 (Lrch4), mRNA [NM_001127551]                                                          | 9,617 |
| 0          | Unknown                                                                                                                                                                     | 9,617 |
| 0          | Unknown                                                                                                                                                                     | 9,615 |

|            |                                                                                                                                               |              |
|------------|-----------------------------------------------------------------------------------------------------------------------------------------------|--------------|
| 0          | Unknown                                                                                                                                       | <b>9,614</b> |
| Kcmf1      | Rattus norvegicus potassium channel modulatory factor 1 (Kcmf1), mRNA [NM_001128192]                                                          | <b>9,612</b> |
| 0          | Suppressor of Ty 5 homolog (S. cerevisiae), isoform CRA_aUncharacterized protein [Source:UniProtKB/TrEMBL;Acc:D3ZSS2] [ENSRNOT00000068115]    | <b>9,612</b> |
| Pdlim5     | Rattus norvegicus PDZ and LIM domain 5 (Pdlim5), mRNA [NM_053326]                                                                             | <b>9,611</b> |
| Wbp1       | Rattus norvegicus WW domain binding protein 1 (Wbp1), mRNA [NM_001106600]                                                                     | <b>9,610</b> |
| Ppapdc1b   | Rattus norvegicus phosphatidic acid phosphatase type 2 domain containing 1B (Ppapdc1b), mRNA [NM_001109411]                                   | <b>9,610</b> |
| Ube2e2     | Rattus norvegicus ubiquitin-conjugating enzyme E2E 2 (UBC4/5 homolog, yeast) (Ube2e2), mRNA [NM_001108371]                                    | <b>9,607</b> |
| 0          | Unknown                                                                                                                                       | <b>9,606</b> |
| Adra1b     | Rattus norvegicus adrenergic, alpha-1B-, receptor (Adra1b), mRNA [NM_016991]                                                                  | <b>9,606</b> |
| Pdzk1ip1   | Rattus norvegicus PDZK1 interacting protein 1 (Pdzk1ip1), mRNA [NM_130401]                                                                    | <b>9,606</b> |
| Mfap1a     | Rattus norvegicus microfibillar-associated protein 1A (Mfap1a), mRNA [NM_001191964]                                                           | <b>9,605</b> |
| 0          | Uncharacterized protein [Source:UniProtKB/TrEMBL;Acc:D4A2W5] [ENSRNOT00000065969]                                                             | <b>9,604</b> |
| Efha2      | Rattus norvegicus EF hand domain family, member A2 (Efha2), mRNA [NM_001191892]                                                               | <b>9,604</b> |
| Scx        | Rattus norvegicus scleraxis (Scx), mRNA [NM_001130508]                                                                                        | <b>9,599</b> |
| Slc44a1    | Choline transporter-like protein 1 [Source:UniProtKB/Swiss-Prot;Acc:Q8VII6] [ENSRNOT00000024229]                                              | <b>9,598</b> |
| Mapk8ip2   | Mapk8ip2 protein [Source:UniProtKB/TrEMBL;Acc:Q3B8P9] [ENSRNOT00000055792]                                                                    | <b>9,594</b> |
| Pddc1      | Rattus norvegicus Parkinson disease 7 domain containing 1 (Pddc1), mRNA [NM_001107563]                                                        | <b>9,594</b> |
| Fam54b     | Rattus norvegicus family with sequence similarity 54, member B (Fam54b), mRNA [NM_001013935]                                                  | <b>9,594</b> |
| Ppp1r2     | Rattus norvegicus protein phosphatase 1, regulatory (inhibitor) subunit 2 (Ppp1r2), mRNA [NM_138823]                                          | <b>9,592</b> |
| Lrrc47     | Rattus norvegicus leucine rich repeat containing 47 (Lrrc47), mRNA [NM_001135666]                                                             | <b>9,591</b> |
| Mare       | Rattus norvegicus alpha globin regulatory element containing gene (Mare), mRNA [NM_001034936]                                                 | <b>9,591</b> |
| Zfp748     | Rattus norvegicus TL0AAA77YJ08 mRNA sequence. [FQ211879]                                                                                      | <b>9,590</b> |
| Actrt2     | Rattus norvegicus actin-related protein T2 (Actrt2), mRNA [NM_001013937]                                                                      | <b>9,589</b> |
| Plekha1    | Rattus norvegicus pleckstrin homology domain containing, family A (phosphoinositide binding specific) member 1 (Plekha1), mRNA [NM_001079894] | <b>9,588</b> |
| Sipa1      | Rattus norvegicus signal-induced proliferation-associated 1 (Sipa1), mRNA [NM_001004089]                                                      | <b>9,588</b> |
| Enc1       | Rattus norvegicus ectodermal-neural cortex 1 (Enc1), mRNA [NM_001003401]                                                                      | <b>9,587</b> |
| RGD1309102 | Rattus norvegicus similar to TRS85 homolog (RGD1309102), mRNA [NM_001106160]                                                                  | <b>9,585</b> |
| 0          | Unknown                                                                                                                                       | <b>9,583</b> |
| Cnot2      | Rattus norvegicus CCR4-NOT transcription complex, subunit 2 (Cnot2), mRNA [NM_001011988]                                                      | <b>9,582</b> |
| Uggt1      | Rattus norvegicus UDP-glucose glycoprotein glucosyltransferase 1 (Uggt1), mRNA [NM_133596]                                                    | <b>9,582</b> |
| Pla2g5     | Rattus norvegicus phospholipase A2, group V (Pla2g5), mRNA [NM_017174]                                                                        | <b>9,581</b> |
| Agtr1b     | Rattus norvegicus angiotensin II receptor, type 1b (Agtr1b), mRNA [NM_031009]                                                                 | <b>9,580</b> |

|           |                                                                                                                                        |       |
|-----------|----------------------------------------------------------------------------------------------------------------------------------------|-------|
| Diaph3    | PREDICTED: Rattus norvegicus diaphanous homolog 3 (Drosophila), transcript variant 2 (Diaph3), mRNA [XM_224392]                        | 9,579 |
| Myh3      | Rattus norvegicus myosin, heavy chain 3, skeletal muscle, embryonic (Myh3), mRNA [NM_012604]                                           | 9,579 |
| Arsj      | Rattus norvegicus arylsulfatase family, member J (Arsj), mRNA [NM_001047887]                                                           | 9,579 |
| Ppara     | Rattus norvegicus peroxisome proliferator activated receptor alpha (Ppara), mRNA [NM_013196]                                           | 9,577 |
| Camk2a    | Rattus norvegicus calcium/calmodulin-dependent protein kinase II alpha (Camk2a), mRNA [NM_012920]                                      | 9,577 |
| 0         | Unknown                                                                                                                                | 9,574 |
| Olr777    | Rattus norvegicus olfactory receptor 777 (Olr777), mRNA [NM_001000579]                                                                 | 9,572 |
| Dcaf7     | Rattus norvegicus DDB1 and CUL4 associated factor 7 (Dcaf7), mRNA [NM_001107057]                                                       | 9,572 |
| Klh22     | Rattus norvegicus kelch-like 22 (Drosophila) (Klh22), mRNA [NM_001107079]                                                              | 9,571 |
| Ppp1r3d   | Rattus norvegicus protein phosphatase 1, regulatory subunit 3D (Ppp1r3d), mRNA [NM_001109564]                                          | 9,571 |
| Yeats4    | Rattus norvegicus YEATS domain containing 4 (Yeats4), mRNA [NM_001127527]                                                              | 9,570 |
| Nek7      | Rattus norvegicus NIMA (never in mitosis gene a)-related kinase 7 (Nek7), mRNA [NM_001108346]                                          | 9,570 |
| Kcne2     | Rattus norvegicus potassium voltage-gated channel, Isk-related family, member 2 (Kcne2), mRNA [NM_133603]                              | 9,569 |
| Map1d     | Rattus norvegicus methionine aminopeptidase 1D (Map1d), mRNA [NM_001107812]                                                            | 9,566 |
| Ttc1      | Rattus norvegicus tetratricopeptide repeat domain 1 (Ttc1), mRNA [NM_001005529]                                                        | 9,566 |
| Ctdspl    | Rattus norvegicus CTD (carboxy-terminal domain, RNA polymerase II, polypeptide A) small phosphatase-like (Ctdspl), mRNA [NM_001106865] | 9,566 |
| 0         | RCG29400Uncharacterized protein [Source:UniProtKB/TrEMBL;Acc:D3ZPS3] [ENSRNOT00000060296]                                              | 9,565 |
| Ch25h     | Rattus norvegicus cholesterol 25-hydroxylase (Ch25h), mRNA [NM_001025415]                                                              | 9,564 |
| Hsd11b2   | Rattus norvegicus hydroxysteroid 11-beta dehydrogenase 2 (Hsd11b2), mRNA [NM_017081]                                                   | 9,564 |
| 0         | Rattus norvegicus similar to RIKEN cDNA 1700001E04 (LOC316188), mRNA [XM_236878]                                                       | 9,562 |
| Fam13a1   | Rattus norvegicus family with sequence similarity 13, member A1 (Fam13a1), mRNA [NM_001100862]                                         | 9,562 |
| Gatad1    | Uncharacterized protein [Source:UniProtKB/TrEMBL;Acc:D3ZHD5] [ENSRNOT00000011666]                                                      | 9,561 |
| LOC310177 | Uncharacterized protein [Source:UniProtKB/TrEMBL;Acc:D3ZS22] [ENSRNOT00000030328]                                                      | 9,561 |
| Cisd3     | Rattus norvegicus CDGSH iron sulfur domain 3 (Cisd3), mRNA [NM_001105835]                                                              | 9,560 |
| Mpp6      | Rattus norvegicus membrane protein, palmitoylated 6 (MAGUK p55 subfamily member 6) (Mpp6), mRNA [NM_001134982]                         | 9,560 |
| 0         | Unknown                                                                                                                                | 9,559 |
| 0         | Unknown                                                                                                                                | 9,557 |
| Dnal4     | Rattus norvegicus dynein, axonemal, light chain 4 (Dnal4), mRNA [NM_001009666]                                                         | 9,557 |
| 0         | Unknown                                                                                                                                | 9,556 |
| Nr2c2     | Rattus norvegicus nuclear receptor subfamily 2, group C, member 2 (Nr2c2), mRNA [NM_017323]                                            | 9,552 |
| Zfp61     | Rattus norvegicus zinc finger protein 61 (Zfp61), mRNA [NM_001017512]                                                                  | 9,551 |
| Rnf25     | Rattus norvegicus ring finger protein 25 (Rnf25), mRNA [NM_001012004]                                                                  | 9,550 |
| Cib1      | Rattus norvegicus calcium and integrin binding 1 (calmyrin) (Cib1), mRNA [NM_031145]                                                   | 9,550 |
| Cenpb     | Uncharacterized protein [Source:UniProtKB/TrEMBL;Acc:D4A5E3] [ENSRNOT00000002929]                                                      | 9,549 |

|            |                                                                                                                                                          |              |
|------------|----------------------------------------------------------------------------------------------------------------------------------------------------------|--------------|
| Ppp1r3d    | Rattus norvegicus protein phosphatase 1, regulatory subunit 3D (Ppp1r3d), mRNA [NM_001109564]                                                            | <b>9,549</b> |
| Chac1      | Rattus norvegicus ChaC, cation transport regulator homolog 1 (E. coli) (Chac1), mRNA [NM_001173437]                                                      | <b>9,548</b> |
| RGD1564845 | Rattus norvegicus similar to RIKEN cDNA 3830403N18 (LOC363507), mRNA [XM_343831]                                                                         | <b>9,548</b> |
| 0          | FQ131320 Rattus norvegicus 11-12 days foetus Sprague-Dawley Rattus norvegicus cDNA clone TL0ADA22YJ10 5', mRNA sequence [FQ131320]                       | <b>9,547</b> |
| Kctd4      | Rattus norvegicus potassium channel tetramerisation domain containing 4 (Kctd4), mRNA [NM_001109650]                                                     | <b>9,547</b> |
| Adrb2      | Rattus norvegicus adrenergic, beta-2-, receptor, surface (Adrb2), mRNA [NM_012492]                                                                       | <b>9,546</b> |
| Pmaip1     | Rattus norvegicus phorbol-12-myristate-13-acetate-induced protein 1 (Pmaip1), mRNA [NM_001008385]                                                        | <b>9,545</b> |
| Atmin      | Rattus norvegicus ATM interactor (Atmin), mRNA [NM_001191786]                                                                                            | <b>9,545</b> |
| Plekha1    | Rattus norvegicus pleckstrin homology domain containing, family A (phosphoinositide binding specific) member 1 (Plekha1), mRNA [NM_001079894]            | <b>9,543</b> |
| Tfrc       | Rattus norvegicus transferrin receptor (Tfrc), mRNA [NM_022712]                                                                                          | <b>9,543</b> |
| Tlk2       | Rattus norvegicus tousled-like kinase 2 (Tlk2), mRNA [NM_001191652]                                                                                      | <b>9,542</b> |
| Ubr4       | Rattus norvegicus ubiquitin protein ligase E3 component n-recognin 4 (Ubr4), mRNA [NM_001039026]                                                         | <b>9,542</b> |
| Whsc2      | Rattus norvegicus Wolf-Hirschhorn syndrome candidate 2 (human) (Whsc2), mRNA [NM_001008339]                                                              | <b>9,541</b> |
| Cdyl2      | Rattus norvegicus chromodomain protein, Y chromosome-like 2 (Cdyl2), mRNA [NM_001106189]                                                                 | <b>9,541</b> |
| RGD1311066 | Rattus norvegicus similar to RIKEN cDNA 0610011L14 gene (RGD1311066), mRNA [NM_001106535]                                                                | <b>9,541</b> |
| Lrtm2      | Rattus norvegicus leucine-rich repeats and transmembrane domains 2 (Lrtm2), mRNA [NM_001109430]                                                          | <b>9,538</b> |
| LOC500877  | Rattus norvegicus Ab1-152 (LOC500877), mRNA [NM_001047963]                                                                                               | <b>9,538</b> |
| Polr3g     | Rattus norvegicus polymerase (RNA) III (DNA directed) polypeptide G (Polr3g), mRNA [NM_001109468]                                                        | <b>9,538</b> |
| Fgfr1      | Rattus norvegicus Fibroblast growth factor receptor 1 (Fgfr1), mRNA [NM_024146]                                                                          | <b>9,535</b> |
| Rpp30      | Rattus norvegicus ribonuclease P/MRP 30 subunit (human) (Rpp30), mRNA [NM_001191083]                                                                     | <b>9,534</b> |
| 0          | Unknown                                                                                                                                                  | <b>9,534</b> |
| Fat3       | Rattus norvegicus FAT tumor suppressor homolog 3 (Drosophila) (Fat3), mRNA [NM_138544]                                                                   | <b>9,533</b> |
| Ltbr       | Rattus norvegicus lymphotoxin beta receptor (TNFR superfamily, member 3) (Ltbr), mRNA [NM_001008315]                                                     | <b>9,532</b> |
| Ly6g5c     | Rattus norvegicus lymphocyte antigen 6 complex, locus G5C (Ly6g5c), mRNA [NM_198739]                                                                     | <b>9,531</b> |
| 0          | Uncharacterized protein [Source:UniProtKB/TrEMBL;Acc:D3ZU94] [ENSRNOT00000059801]                                                                        | <b>9,531</b> |
| Gpr85      | Rattus norvegicus G protein-coupled receptor 85 (Gpr85), mRNA [NM_022254]                                                                                | <b>9,530</b> |
| Mrpl50     | Rattus norvegicus mitochondrial ribosomal protein L50 (Mrpl50), nuclear gene encoding mitochondrial protein, mRNA [NM_001108665]                         | <b>9,529</b> |
| 0          | Rattus norvegicus similar to glyceraldehyde-3-phosphate dehydrogenase (LOC297785), mRNA [XM_216321]                                                      | <b>9,527</b> |
| Brwd3      | PREDICTED: Rattus norvegicus bromodomain and WD repeat domain containing 3 (Brwd3), mRNA [XM_001054667]                                                  | <b>9,525</b> |
| Cox11      | Rattus norvegicus COX11 homolog, cytochrome c oxidase assembly protein (yeast) (Cox11), nuclear gene encoding mitochondrial protein, mRNA [NM_001109575] | <b>9,525</b> |
| 0          | Unknown                                                                                                                                                  | <b>9,524</b> |
| Thap4      | Rattus norvegicus THAP domain containing 4 (Thap4), mRNA [NM_001005564]                                                                                  | <b>9,523</b> |

|            |                                                                                                                  |       |
|------------|------------------------------------------------------------------------------------------------------------------|-------|
| Fam167a    | Rattus norvegicus family with sequence similarity 167, member A (Fam167a), mRNA [NM_001109102]                   | 9,522 |
| Stx8       | Rattus norvegicus syntaxin 8 (Stx8), mRNA [NM_031656]                                                            | 9,521 |
| Clns1a     | Rattus norvegicus chloride channel, nucleotide-sensitive, 1A (Clns1a), mRNA [NM_031719]                          | 9,521 |
| 0          | Unknown                                                                                                          | 9,520 |
| Epb4111    | Rattus norvegicus erythrocyte membrane protein band 4.1-like 1 (Epb4111), transcript variant 2, mRNA [NM_021681] | 9,520 |
| Ccdc130    | Rattus norvegicus coiled-coil domain containing 130 (Ccdc130), mRNA [NM_001037644]                               | 9,520 |
| Cdc42ep5   | Rattus norvegicus CDC42 effector protein (Rho GTPase binding) 5 (Cdc42ep5), mRNA [NM_001108469]                  | 9,518 |
| Tmem130    | Rattus norvegicus transmembrane protein 130 (Tmem130), mRNA [NM_001170399]                                       | 9,518 |
| 0          | Unknown                                                                                                          | 9,517 |
| Htr1a      | Rattus norvegicus 5-hydroxytryptamine (serotonin) receptor 1A (Htr1a), mRNA [NM_012585]                          | 9,516 |
| Fam160b1   | LOC361774 (Predicted)Uncharacterized protein [Source:UniProtKB/TrEMBL;Acc:D4A3I5] [ENSRNOT00000023247]           | 9,516 |
| Chst10     | Rattus norvegicus carbohydrate sulfotransferase 10 (Chst10), mRNA [NM_080397]                                    | 9,514 |
| RGD1563351 | PREDICTED: Rattus norvegicus RGD1563351 (RGD1563351), mRNA [XM_238200]                                           | 9,514 |
| RGD1565598 | PREDICTED: Rattus norvegicus similar to serine/threonine kinase (RGD1565598), mRNA [XM_001055923]                | 9,512 |
| Olr206     | Rattus norvegicus olfactory receptor 206 (Olr206), mRNA [NM_001000193]                                           | 9,511 |
| 0          | Unknown                                                                                                          | 9,509 |
| 0          | Unknown                                                                                                          | 9,509 |
| 0          | Uncharacterized protein [Source:UniProtKB/TrEMBL;Acc:D3ZIS8] [ENSRNOT00000060124]                                | 9,509 |
| Cd16311    | Rattus norvegicus CD163 molecule-like 1 (Cd16311), mRNA [NM_001106312]                                           | 9,509 |
| Cldn10     | Rattus norvegicus claudin 10 (Cldn10), mRNA [NM_001106058]                                                       | 9,509 |
| Slc22a15   | Rattus norvegicus solute carrier family 22, member 15 (Slc22a15), mRNA [NM_001107707]                            | 9,507 |
| Slc4a10    | Rattus norvegicus solute carrier family 4, sodium bicarbonate transporter, member 10 (Slc4a10), mRNA [NM_178092] | 9,506 |
| Fubp1      | Rattus norvegicus far upstream element (FUSE) binding protein 1 (Fubp1), mRNA [NM_001037653]                     | 9,506 |
| 0          | Unknown                                                                                                          | 9,506 |
| 0          | PREDICTED: Rattus norvegicus multiple EGF-like-domains 11 (Megf11), mRNA [XM_001078620]                          | 9,504 |
| Pcdha13    | Rattus norvegicus protocadherin alpha 13 (Pcdha13), mRNA [NM_053934]                                             | 9,503 |
| Kdr        | Rattus norvegicus kinase insert domain receptor (Kdr), mRNA [NM_013062]                                          | 9,503 |
| 0          | Unknown                                                                                                          | 9,502 |
| Wfdc10     | Rattus norvegicus WAP four-disulfide core domain 10 (Wfdc10), mRNA [NM_001109461]                                | 9,501 |
| RGD1559442 | Rattus norvegicus similar to SET binding factor 2 (LOC691036), mRNA [NM_001134970]                               | 9,500 |
| Txnrd1     | Rattus norvegicus thioredoxin reductase 1 (Txnrd1), mRNA [NM_031614]                                             | 9,497 |
| Camkv      | Rattus norvegicus CaM kinase-like vesicle-associated (Camkv), mRNA [NM_024000]                                   | 9,496 |
| 0          | Unknown                                                                                                          | 9,496 |
| Rpp14      | Rattus norvegicus ribonuclease P 14 subunit (human) (Rpp14), transcript variant 1, mRNA [NM_001108372]           | 9,495 |

|            |                                                                                                                                                |              |
|------------|------------------------------------------------------------------------------------------------------------------------------------------------|--------------|
| 0          | Uncharacterized protein [Source:UniProtKB/TrEMBL;Acc:D4A2F4] [ENSRNOT00000014567]                                                              | <b>9,494</b> |
| Hipk4      | Rattus norvegicus homeodomain interacting protein kinase 4 (Hipk4), mRNA [NM_001024776]                                                        | <b>9,493</b> |
| Pom121l2   | Rattus norvegicus POM121 membrane glycoprotein-like 2 (Pom121l2), transcript variant 1, mRNA [NM_001162930]                                    | <b>9,492</b> |
| Dph1       | Rattus norvegicus DPH1 homolog (S. cerevisiae) (Dph1), mRNA [NM_001105809]                                                                     | <b>9,491</b> |
| Prss36     | Rattus norvegicus protease, serine, 36 (Prss36), mRNA [NM_001011560]                                                                           | <b>9,491</b> |
| Evc        | Rattus norvegicus Ellis van Creveld syndrome homolog (human) (Evc), mRNA [NM_001170439]                                                        | <b>9,490</b> |
| Tes        | Rattus norvegicus testis derived transcript (Tes), mRNA [NM_001039344]                                                                         | <b>9,490</b> |
| Polr3a     | PREDICTED: Rattus norvegicus polymerase (RNA) III (DNA directed) polypeptide A (Polr3a), partial mRNA [XM_341388]                              | <b>9,489</b> |
| 0          | Rattus norvegicus similar to glyceraldehyde-3-phosphate-dehydrogenase (EC 1.2.1.12) (LOC314605), mRNA [XM_234875]                              | <b>9,488</b> |
| Atf1       | Rattus norvegicus activating transcription factor 1 (Atf1), mRNA [NM_001100895]                                                                | <b>9,488</b> |
| 0          | Unknown                                                                                                                                        | <b>9,486</b> |
| Olr752     | Rattus norvegicus olfactory receptor 752 (Olr752), mRNA [NM_001000367]                                                                         | <b>9,484</b> |
| Znf704     | PREDICTED: Rattus norvegicus zinc finger protein 704 (Znf704), mRNA [XM_226953]                                                                | <b>9,482</b> |
| 0          | Unknown                                                                                                                                        | <b>9,480</b> |
| Gfpt1      | Rattus norvegicus glutamine fructose-6-phosphate transaminase 1 (Gfpt1), mRNA [NM_001005879]                                                   | <b>9,480</b> |
| Lrat       | Rattus norvegicus lecithin-retinol acyltransferase (phosphatidylcholine-retinol-O-acyltransferase) (Lrat), mRNA [NM_022280]                    | <b>9,479</b> |
| Bach1      | Rattus norvegicus BTB and CNC homology 1, basic leucine zipper transcription factor 1 (Bach1), mRNA [NM_001107113]                             | <b>9,478</b> |
| Ly6h       | Rattus norvegicus lymphocyte antigen 6 complex, locus H (Ly6h), mRNA [NM_001134839]                                                            | <b>9,478</b> |
| Kif26a     | Rattus norvegicus kinesin family member 26A (Kif26a), mRNA [NM_001170348]                                                                      | <b>9,477</b> |
| Klhl29     | Rattus norvegicus kelch-like 29 (Drosophila) (Klhl29), mRNA [NM_001106713]                                                                     | <b>9,476</b> |
| RGD1303144 | Rattus norvegicus HypB, AroK, ADK and rho factor domain containing protein RGD1303144 (RGD1303144), mRNA [NM_001004266]                        | <b>9,474</b> |
| Vps13b     | Rattus norvegicus vacuolar protein sorting 13 homolog B (yeast) (Vps13b), mRNA [NM_001134886]                                                  | <b>9,472</b> |
| MGC116197  | Rattus norvegicus similar to RIKEN cDNA 1700001E04 (MGC116197), mRNA [NM_001025755]                                                            | <b>9,472</b> |
| 0          | Uncharacterized protein [Source:UniProtKB/TrEMBL;Acc:D4AE17] [ENSRNOT00000002068]                                                              | <b>9,470</b> |
| 0          | Rattus norvegicus similar to glyceraldehyde-3-phosphate dehydrogenase (phosphorylating) (EC 1.2.1.12) - mouse (LOC293463), mRNA [XM_219301]    | <b>9,467</b> |
| Maf1       | Rattus norvegicus MAF1 homolog (S. cerevisiae) (Maf1), mRNA [NM_001014085]                                                                     | <b>9,464</b> |
| LOC689926  | Rattus norvegicus hypothetical protein LOC689926 (LOC689926), mRNA [NM_001163002]                                                              | <b>9,463</b> |
| Pdp1       | Rattus norvegicus pyruvate dehydrogenase phosphatase catalytic subunit 1 (Pdp1), nuclear gene encoding mitochondrial protein, mRNA [NM_019372] | <b>9,461</b> |
| RGD1311345 | Rattus norvegicus similar to CG9752-PA (RGD1311345), mRNA [NM_001173436]                                                                       | <b>9,461</b> |
| Rtn4r      | Rattus norvegicus reticulon 4 receptor (Rtn4r), mRNA [NM_053613]                                                                               | <b>9,459</b> |
| Bphl       | Rattus norvegicus biphenyl hydrolase-like (serine hydrolase) (Bphl), mRNA [NM_001037206]                                                       | <b>9,459</b> |
| Foxp3      | Rattus norvegicus forkhead box P3 (Foxp3), mRNA [NM_001108250]                                                                                 | <b>9,456</b> |

|            |                                                                                                                                              |       |
|------------|----------------------------------------------------------------------------------------------------------------------------------------------|-------|
| 0          | Q52289_PSEPU (Q52289) UxpA protein, partial (5%) [TC624946]                                                                                  | 9,455 |
| Tal1       | Rattus norvegicus T-cell acute lymphocytic leukemia 1 (Tal1), mRNA [NM_001107958]                                                            | 9,455 |
| Mln        | Rattus norvegicus motilin (Mln), mRNA [NM_001110056]                                                                                         | 9,455 |
| Dph2       | Rattus norvegicus DPH2 homolog (S. cerevisiae) (Dph2), mRNA [NM_001015007]                                                                   | 9,454 |
| Pmf1       | Rattus norvegicus polyamine-modulated factor 1 (Pmf1), mRNA [NM_001191568]                                                                   | 9,453 |
| Apip       | Rattus norvegicus APAF1 interacting protein (Apip), mRNA [NM_001106492]                                                                      | 9,452 |
| Cenpk      | Rattus norvegicus centromere protein K (Cenpk), mRNA [NM_001106407]                                                                          | 9,449 |
| RGD1560028 | Rattus norvegicus similar to RIKEN cDNA C130060K24 gene (RGD1560028), mRNA [NM_001109239]                                                    | 9,449 |
| Zbtb34     | PREDICTED: Rattus norvegicus zinc finger and BTB domain containing 34 (Zbtb34), mRNA [XM_001069858]                                          | 9,448 |
| Wdr20a     | Rattus norvegicus WD repeat domain 20a (Wdr20a), mRNA [NM_001100894]                                                                         | 9,447 |
| Slc4a11    | Rattus norvegicus solute carrier family 4, sodium borate transporter, member 11 (Slc4a11), mRNA [NM_001107775]                               | 9,445 |
| 0          | RVL797 Wackym-Soares normalized rat vestibular cDNA library Rattus norvegicus cDNA 5', mRNA sequence [CX569749]                              | 9,445 |
| RGD1563748 | PREDICTED: Rattus norvegicus similar to ankyrin-like protein (RGD1563748), mRNA [XM_214327]                                                  | 9,445 |
| Trim35     | Rattus norvegicus tripartite motif-containing 35 (Trim35), mRNA [NM_001025142]                                                               | 9,442 |
| 0          | Unknown                                                                                                                                      | 9,441 |
| Gtf2h5     | Rattus norvegicus general transcription factor IIH, polypeptide 5 (Gtf2h5), mRNA [NM_001126088]                                              | 9,440 |
| 0          | Uncharacterized protein [Source:UniProtKB/TrEMBL;Acc:D4ACT2] [ENSRNOT00000008002]                                                            | 9,438 |
| RGD1564803 | PREDICTED: Rattus norvegicus RGD1564803 (RGD1564803), mRNA [XM_579791]                                                                       | 9,437 |
| Aldoc      | Rattus norvegicus aldolase C, fructose-bisphosphate (Aldoc), mRNA [NM_012497]                                                                | 9,436 |
| RGD1311357 | PREDICTED: Rattus norvegicus similar to A530083I02Rik protein (RGD1311357), mRNA [XM_001070093]                                              | 9,434 |
| Pcbp3      | Rattus norvegicus poly(rC) binding protein 3 (Pcbp3), mRNA [NM_001011945]                                                                    | 9,434 |
| Eif4g3     | Rattus norvegicus eukaryotic translation initiation factor 4 gamma, 3 (Eif4g3), mRNA [NM_001106693]                                          | 9,433 |
| Antxr1     | Rattus norvegicus anthrax toxin receptor 1 (Antxr1), mRNA [NM_001044249]                                                                     | 9,433 |
| Pan3       | PREDICTED: Rattus norvegicus PAN3 polyA specific ribonuclease subunit homolog (S. cerevisiae), transcript variant 2 (Pan3), mRNA [XM_346914] | 9,432 |
| Mitd1      | Rattus norvegicus MIT, microtubule interacting and transport, domain containing 1 (Mitd1), mRNA [NM_001009714]                               | 9,431 |
| Serhl2     | Rattus norvegicus serine hydrolase-like 2 (Serhl2), mRNA [NM_001130579]                                                                      | 9,431 |
| Znf553     | PREDICTED: Rattus norvegicus zinc finger protein 553 (Znf553), mRNA [XM_219345]                                                              | 9,430 |
| Dcaf11     | Rattus norvegicus DDB1 and CUL4 associated factor 11 (Dcaf11), mRNA [NM_001009686]                                                           | 9,430 |
| Trmt6      | Rattus norvegicus tRNA methyltransferase 6 homolog (S. cerevisiae) (Trmt6), mRNA [NM_001107779]                                              | 9,430 |
| Rabggta    | Rattus norvegicus Rab geranylgeranyltransferase, alpha subunit (Rabggta), mRNA [NM_031654]                                                   | 9,430 |
| 0          | Unknown                                                                                                                                      | 9,429 |
| RGD1308470 | Rattus norvegicus similar to RIKEN cDNA 4933433P14 gene (RGD1308470), mRNA [NM_001014198]                                                    | 9,428 |
| Usp47      | Rattus norvegicus ubiquitin specific peptidase 47 (Usp47), mRNA [NM_001107542]                                                               | 9,427 |



|           |                                                                                                                  |       |
|-----------|------------------------------------------------------------------------------------------------------------------|-------|
| 0         | Rattus norvegicus TL0ACA43YD07 mRNA sequence. [FQ216390]                                                         | 9,426 |
| Rufy4     | PREDICTED: Rattus norvegicus RUN and FYVE domain containing 4 (Rufy4), mRNA [XM_001056259]                       | 9,425 |
| 0         | Unknown                                                                                                          | 9,424 |
| Mdp1      | Rattus norvegicus magnesium-dependent phosphatase 1 (Mdp1), mRNA [NM_001106039]                                  | 9,422 |
| Cyp2u1    | Rattus norvegicus cytochrome P450, family 2, subfamily u, polypeptide 1 (Cyp2u1), mRNA [NM_001024779]            | 9,420 |
| Oas1b     | Rattus norvegicus 2-5 oligoadenylate synthetase 1B (Oas1b), mRNA [NM_144752]                                     | 9,418 |
| 0         | Uncharacterized protein [Source:UniProtKB/TrEMBL;Acc:D3ZAP7] [ENSRNOT00000008901]                                | 9,417 |
| Kdelc2    | Rattus norvegicus KDEL (Lys-Asp-Glu-Leu) containing 2 (Kdelc2), mRNA [NM_001025123]                              | 9,417 |
| Slc4a1    | Rattus norvegicus solute carrier family 4 (anion exchanger), member 1 (Slc4a1), mRNA [NM_012651]                 | 9,416 |
| 0         | Unknown                                                                                                          | 9,412 |
| Twist1    | Rattus norvegicus twist homolog 1 (Drosophila) (Twist1), mRNA [NM_053530]                                        | 9,412 |
| Ss18l1    | Rattus norvegicus synovial sarcoma translocation gene on chromosome 18-like 1 (Ss18l1), mRNA [NM_138918]         | 9,412 |
| Col23a1   | Rattus norvegicus collagen, type XXIII, alpha 1 (Col23a1), mRNA [NM_181636]                                      | 9,410 |
| LOC500974 | PREDICTED: Rattus norvegicus similar to CDNA sequence BC024479 (LOC500974), miscRNA [XR_005433]                  | 9,409 |
| Dusp6     | Rattus norvegicus dual specificity phosphatase 6 (Dusp6), mRNA [NM_053883]                                       | 9,408 |
| 0         | PREDICTED: Rattus norvegicus similar to Protein KIAA0586 (LOC690035), miscRNA [XR_086273]                        | 9,404 |
| 0         | PREDICTED: Rattus norvegicus anillin, actin binding protein (Anln), mRNA [XM_001067026]                          | 9,404 |
| 0         | Unknown                                                                                                          | 9,403 |
| 0         | transcription factor CP2 [Source:RefSeq peptide;Acc:NP_001128186] [ENSRNOT00000055374]                           | 9,403 |
| Pign      | Rattus norvegicus phosphatidylinositol glycan, class N (Pign), mRNA [NM_001100584]                               | 9,399 |
| Pdcd7     | Rattus norvegicus programmed cell death 7 (Pdcd7), mRNA [NM_001108768]                                           | 9,399 |
| 0         | Unknown                                                                                                          | 9,398 |
| Anp32e    | Rattus norvegicus acidic (leucine-rich) nuclear phosphoprotein 32 family, member E (Anp32e), mRNA [NM_001013200] | 9,397 |
| 0         | Unknown                                                                                                          | 9,397 |
| Cbx1      | RCG35120, isoform CRA_aUncharacterized protein [Source:UniProtKB/TrEMBL;Acc:D4A3T3] [ENSRNOT00000011665]         | 9,397 |
| Steap4    | Rattus norvegicus STEAP family member 4 (Steap4), mRNA [NM_001044265]                                            | 9,396 |
| LOC501222 | Rattus norvegicus TL0AAA47YE23 mRNA sequence. [FQ213532]                                                         | 9,393 |
| 0         | Q412C4_KINRA (Q412C4) Amine oxidase, partial (3%) [TC617018]                                                     | 9,390 |
| Eif2c4    | Rattus norvegicus eukaryotic translation initiation factor 2C, 4 (Eif2c4), mRNA [NM_001106686]                   | 9,388 |
| 0         | Unknown                                                                                                          | 9,388 |
| Rshl1     | Rattus norvegicus radial spokehead-like 1 (Rshl1), mRNA [NM_001024748]                                           | 9,387 |
| 0         | Q6DC77_BRARE (Q6DC77) Zgc:101065, partial (7%) [TC593872]                                                        | 9,387 |
| 0         | Unknown                                                                                                          | 9,387 |
| 0         | Unknown                                                                                                          | 9,385 |

|            |                                                                                                                                       |              |
|------------|---------------------------------------------------------------------------------------------------------------------------------------|--------------|
| 0          | Q2JMC8_SYNJB (Q2JMC8) TonB family protein, partial (7%) [TC596892]                                                                    | <b>9,385</b> |
| 0          | Rattus norvegicus cDNA clone IMAGE:7300863. [BC084702]                                                                                | <b>9,384</b> |
| RGD1563375 | PREDICTED: Rattus norvegicus similar to small nuclear ribonucleoparticle-associated protein (RGD1563375), mRNA [XM_345546]            | <b>9,384</b> |
| 0          | Unknown                                                                                                                               | <b>9,384</b> |
| Geft       | Rattus norvegicus RhoA/RAC/CDC42 exchange factor (Geft), mRNA [NM_199395]                                                             | <b>9,383</b> |
| 0          | Q9VXG3_DROME (Q9VXG3) CG9968-PB, isoform B, partial (4%) [TC635273]                                                                   | <b>9,382</b> |
| LOC680643  | PREDICTED: Rattus norvegicus similar to MIC2 like 1 (LOC680643), mRNA [XM_001058120]                                                  | <b>9,382</b> |
| RGD1564541 | Rattus norvegicus similar to hypothetical protein FLJ22965 (RGD1564541), mRNA [NM_001107950]                                          | <b>9,381</b> |
| Cybas3     | Rattus norvegicus cytochrome b, ascorbate dependent 3 (Cybas3), mRNA [NM_001014164]                                                   | <b>9,380</b> |
| RGD1561878 | PREDICTED: Rattus norvegicus similar to mKIAA0978 protein (RGD1561878), mRNA [XM_002726270]                                           | <b>9,380</b> |
| Doc2b      | Rattus norvegicus double C2-like domains, beta (Doc2b), mRNA [NM_031142]                                                              | <b>9,380</b> |
| Stmn2      | Rattus norvegicus stathmin-like 2 (Stmn2), mRNA [NM_053440]                                                                           | <b>9,379</b> |
| Ubtd1      | Rattus norvegicus ubiquitin domain containing 1 (Ubtd1), mRNA [NM_001013153]                                                          | <b>9,379</b> |
| Dppa3      | Rattus norvegicus developmental pluripotency-associated 3 (Dppa3), mRNA [NM_001047864]                                                | <b>9,378</b> |
| Anp32b     | Rattus norvegicus acidic (leucine-rich) nuclear phosphoprotein 32 family, member B (Anp32b), mRNA [NM_131911]                         | <b>9,378</b> |
| Ftsjd2     | Rattus norvegicus FtsJ methyltransferase domain containing 2 (Ftsjd2), mRNA [NM_001014031]                                            | <b>9,377</b> |
| Cyp2b15    | Rattus norvegicus cytochrome P450, family 2, subfamily b, polypeptide 15 (Cyp2b15), mRNA [NM_001135668]                               | <b>9,372</b> |
| 0          | Unknown                                                                                                                               | <b>9,371</b> |
| Parp16     | Rattus norvegicus poly (ADP-ribose) polymerase family, member 16 (Parp16), mRNA [NM_001014093]                                        | <b>9,368</b> |
| Gpr162     | Rattus norvegicus G protein-coupled receptor 162 (Gpr162), mRNA [NM_001108646]                                                        | <b>9,368</b> |
| Alkbh8     | Rattus norvegicus alkB, alkylation repair homolog 8 (E. coli) (Alkbh8), mRNA [NM_001191909]                                           | <b>9,367</b> |
| Chst14     | Rattus norvegicus carbohydrate (N-acetylgalactosamine 4-0) sulfotransferase 14 (Chst14), mRNA [NM_001109639]                          | <b>9,365</b> |
| 0          | Unknown                                                                                                                               | <b>9,363</b> |
| Slc17a6    | Rattus norvegicus solute carrier family 17 (sodium-dependent inorganic phosphate cotransporter), member 6 (Slc17a6), mRNA [NM_053427] | <b>9,363</b> |
| 0          | Unknown                                                                                                                               | <b>9,362</b> |
| Gja10      | Rattus norvegicus gap junction protein, alpha 10 (Gja10), mRNA [NM_001173508]                                                         | <b>9,360</b> |
| 0          | Rattus norvegicus TL0ADA32YM01 mRNA sequence. [FQ221714]                                                                              | <b>9,360</b> |
| 0          | PREDICTED: Rattus norvegicus similar to taube nuss (RGD1562299), mRNA [XM_234348]                                                     | <b>9,358</b> |
| Cyhr1      | Rattus norvegicus cysteine and histidine rich 1 (Cyhr1), mRNA [NM_001025122]                                                          | <b>9,358</b> |
| 0          | Rattus norvegicus similar to T cell receptor V-alpha J-alpha (LOC290165), mRNA [XM_224125]                                            | <b>9,358</b> |
| Mthfr      | Methylenetetrahydrofolate reductase [Source:UniProtKB/TrEMBL;Acc:D4A7E8] [ENSRNOT00000011384]                                         | <b>9,358</b> |
| LOC681224  | PREDICTED: Rattus norvegicus similar to cyclin D binding myb-like transcription factor 1 (LOC681224), partial mRNA [XM_002725335]     | <b>9,356</b> |
| 0          | Uncharacterized protein [Source:UniProtKB/TrEMBL;Acc:D3ZX94] [ENSRNOT00000013367]                                                     | <b>9,355</b> |
| Ascl2      | Rattus norvegicus achaete-scute complex homolog 2 (Drosophila) (Ascl2), mRNA [NM_031503]                                              | <b>9,355</b> |

|            |                                                                                                                                                                                                 |       |
|------------|-------------------------------------------------------------------------------------------------------------------------------------------------------------------------------------------------|-------|
| 0          | Unknown                                                                                                                                                                                         | 9,355 |
| Relt       | Rattus norvegicus RELT tumor necrosis factor receptor (Relt), mRNA [NM_001108495]                                                                                                               | 9,354 |
| LOC685796  | PREDICTED: Rattus norvegicus similar to similar to RIKEN cDNA 1700001E04 (LOC685796), mRNA [XM_001065304]                                                                                       | 9,353 |
| Fam193b    | Rattus norvegicus family with sequence similarity 193, member B (Fam193b), mRNA [NM_001170408]                                                                                                  | 9,353 |
| 0          | Glyceraldehyde-3-phosphate dehydrogenase [Source:UniProtKB/TrEMBL;Acc:D4A6J7] [ENSRNOT00000002985]                                                                                              | 9,351 |
| Arfgef1    | ADP-ribosylation factor guanine nucleotide-exchange factor 1(Brefeldin A-inhibited) (Predicted), isoform CRA_aUncharacterized protein [Source:UniProtKB/TrEMBL;Acc:D4A631] [ENSRNOT00000007766] | 9,350 |
| Slc25a36   | PREDICTED: Rattus norvegicus solute carrier family 25, member 36 (Slc25a36), mRNA [XM_001065705]                                                                                                | 9,349 |
| Wars       | Rattus norvegicus tryptophanyl-tRNA synthetase (Wars), mRNA [NM_001013170]                                                                                                                      | 9,349 |
| 0          | Uncharacterized protein [Source:UniProtKB/TrEMBL;Acc:D3Z884] [ENSRNOT00000049147]                                                                                                               | 9,346 |
| Rufy2      | Rattus norvegicus RUN and FYVE domain containing 2 (Rufy2), mRNA [NM_001168586]                                                                                                                 | 9,346 |
| RGD1305704 | Rattus norvegicus cDNA clone IMAGE:5598328, **** WARNING: chimeric clone ****. [BC168677]                                                                                                       | 9,346 |
| Dcun1d4    | Rattus norvegicus DCN1, defective in cullin neddylation 1, domain containing 4 (S. cerevisiae) (Dcun1d4), mRNA [NM_001108359]                                                                   | 9,345 |
| Smcr8      | Rattus norvegicus Smith-Magenis syndrome chromosome region, candidate 8 homolog (human) (Smcr8), mRNA [NM_001191919]                                                                            | 9,345 |
| 0          | Unknown                                                                                                                                                                                         | 9,345 |
| Nrg4       | Rattus norvegicus neuregulin 4 (Nrg4), mRNA [NM_001191109]                                                                                                                                      | 9,343 |
| Itgb4      | Rattus norvegicus integrin, beta 4 (Itgb4), mRNA [NM_013180]                                                                                                                                    | 9,342 |
| Trim47     | Rattus norvegicus tripartite motif-containing 47 (Trim47), mRNA [NM_001109585]                                                                                                                  | 9,341 |
| Chat       | Rattus norvegicus choline acetyltransferase (Chat), mRNA [NM_001170593]                                                                                                                         | 9,341 |
| Amigo2     | Rattus norvegicus adhesion molecule with Ig like domain 2 (Amigo2), mRNA [NM_182816]                                                                                                            | 9,341 |
| Rassf9     | Rattus norvegicus Ras association (RalGDS/AF-6) domain family (N-terminal) member 9 (Rassf9), mRNA [NM_022959]                                                                                  | 9,340 |
| Tmcc2      | PREDICTED: Rattus norvegicus transmembrane and coiled-coil domain family 2 (Tmcc2), mRNA [XM_223107]                                                                                            | 9,339 |
| Olr714     | Rattus norvegicus olfactory receptor 714 (Olr714), mRNA [NM_001000923]                                                                                                                          | 9,339 |
| Tada3l     | Rattus norvegicus transcriptional adaptor 3 (NGG1 homolog, yeast)-like (Tada3l), mRNA [NM_001025734]                                                                                            | 9,339 |
| Phospho1   | Rattus norvegicus phosphatase, orphan 1 (Phospho1), mRNA [NM_001105833]                                                                                                                         | 9,338 |
| 0          | Unknown                                                                                                                                                                                         | 9,338 |
| 0          | Unknown                                                                                                                                                                                         | 9,338 |
| Serpinb8   | Rattus norvegicus serpin peptidase inhibitor, clade B (ovalbumin), member 8 (Serpinb8), mRNA [NM_001105948]                                                                                     | 9,337 |
| Nelf       | Rattus norvegicus nasal embryonic LHRH factor (Nelf), mRNA [NM_057190]                                                                                                                          | 9,336 |
| Lce1f      | Rattus norvegicus late cornified envelope 1F (Lce1f), mRNA [NM_001109188]                                                                                                                       | 9,335 |
| 0          | CB545809 AMGNNUC:MRPE3-00116-C9-A placenta embryo D17 (10379) Rattus norvegicus cDNA clone mrpe3-00116-c9 5', mRNA sequence [CB545809]                                                          | 9,334 |
| Slc35e1    | Rattus norvegicus solute carrier family 35, member E1 (Slc35e1), mRNA [NM_001109107]                                                                                                            | 9,334 |
| 0          | Unknown                                                                                                                                                                                         | 9,334 |

|            |                                                                                                                                                            |              |
|------------|------------------------------------------------------------------------------------------------------------------------------------------------------------|--------------|
| Tnfsf15    | Rattus norvegicus tumor necrosis factor (ligand) superfamily, member 15 (Tnfsf15), mRNA [NM_145765]                                                        | <b>9,333</b> |
| 0          | Unknown                                                                                                                                                    | <b>9,333</b> |
| Dgcr2      | Rattus norvegicus TL0AAA82YH19 mRNA sequence. [FQ211720]                                                                                                   | <b>9,332</b> |
| Cast       | Rattus norvegicus calpastatin (Cast), transcript variant 1, mRNA [NM_053295]                                                                               | <b>9,328</b> |
| Fndc1      | Rattus norvegicus fibronectin type III domain containing 1 (Fndc1), mRNA [NM_001038615]                                                                    | <b>9,328</b> |
| ErbB2      | Rattus norvegicus v-erb-b2 erythroblastic leukemia viral oncogene homolog 2, neuro/glioblastoma derived oncogene homolog (avian) (ErbB2), mRNA [NM_017003] | <b>9,324</b> |
| MtMr3      | Rattus norvegicus myotubularin related protein 3 (MtMr3), mRNA [NM_001012038]                                                                              | <b>9,324</b> |
| Wrap53     | Rattus norvegicus WD repeat containing, antisense to TP53 (Wrap53), mRNA [NM_001007610]                                                                    | <b>9,324</b> |
| Acox1      | Rattus norvegicus acyl-Coenzyme A oxidase-like (Acox1), mRNA [NM_001106508]                                                                                | <b>9,322</b> |
| Uroc1      | Uncharacterized protein [Source:UniProtKB/TrEMBL;Acc:D3ZDW1] [ENSRNOT00000038251]                                                                          | <b>9,321</b> |
| Mobk13     | Rattus norvegicus MOB1, Mps One Binder kinase activator-like 3 (yeast) (Mobk13), mRNA [NM_133528]                                                          | <b>9,319</b> |
| Dlx1       | Rattus norvegicus distal-less homeobox 1 (Dlx1), mRNA [NM_001100531]                                                                                       | <b>9,319</b> |
| Actc1      | Rattus norvegicus actin, alpha, cardiac muscle 1 (Actc1), mRNA [NM_019183]                                                                                 | <b>9,318</b> |
| Inpp5f     | Rattus norvegicus inositol polyphosphate-5-phosphatase F (Inpp5f), mRNA [NM_001107554]                                                                     | <b>9,318</b> |
| Sorcs3     | Rattus norvegicus sortilin-related VPS10 domain containing receptor 3 (Sorcs3), mRNA [NM_001106367]                                                        | <b>9,317</b> |
| Als2       | Rattus norvegicus amyotrophic lateral sclerosis 2 (juvenile) homolog (human) (Als2), mRNA [NM_001013413]                                                   | <b>9,316</b> |
| 0          | Unknown                                                                                                                                                    | <b>9,316</b> |
| Cds2       | Rattus norvegicus CDP-diacylglycerol synthase (phosphatidate cytidyltransferase) 2 (Cds2), mRNA [NM_053643]                                                | <b>9,315</b> |
| St8sia5    | Rattus norvegicus ST8 alpha-N-acetyl-neuraminide alpha-2,8-sialyltransferase 5 (St8sia5), mRNA [NM_213628]                                                 | <b>9,314</b> |
| Nop10      | Rattus norvegicus NOP10 ribonucleoprotein homolog (yeast) (Nop10), mRNA [NM_001126100]                                                                     | <b>9,312</b> |
| Mrpl42     | Rattus norvegicus mitochondrial ribosomal protein L42 (Mrpl42), nuclear gene encoding mitochondrial protein, mRNA [NM_001106782]                           | <b>9,311</b> |
| Cirh1a     | Rattus norvegicus cirrhosis, autosomal recessive 1A (cirhin) (Cirh1a), mRNA [NM_001009640]                                                                 | <b>9,311</b> |
| 0          | Uncharacterized protein [Source:UniProtKB/TrEMBL;Acc:D3ZIW7] [ENSRNOT00000068671]                                                                          | <b>9,311</b> |
| 0          | RIKEN cDNA 5330417C22 gene Gene [Source:MGI Symbol;Acc:MGI:1923930] [ENSRNOT00000027493]                                                                   | <b>9,311</b> |
| LOC689316  | PREDICTED: Rattus norvegicus hypothetical protein LOC689316 (LOC689316), miscRNA [XR_085654]                                                               | <b>9,311</b> |
| Pcdhb22    | Protocadherin-T5 [Source:UniProtKB/TrEMBL;Acc:Q9JIU0] [ENSRNOT00000027133]                                                                                 | <b>9,309</b> |
| Tada2b     | Rattus norvegicus transcriptional adaptor 2 (ADA2 homolog, yeast)-beta (Tada2b), mRNA [NM_001170455]                                                       | <b>9,307</b> |
| Eed        | Rattus norvegicus embryonic ectoderm development (Eed), mRNA [NM_001106278]                                                                                | <b>9,306</b> |
| 0          | Unknown                                                                                                                                                    | <b>9,304</b> |
| Mpp5       | Rattus norvegicus membrane protein, palmitoylated 5 (MAGUK p55 subfamily member 5) (Mpp5), mRNA [NM_001108034]                                             | <b>9,304</b> |
| Flvcr2     | Rattus norvegicus feline leukemia virus subgroup C cellular receptor family, member 2 (Flvcr2), mRNA [NM_199109]                                           | <b>9,302</b> |
| RGD1307983 | PREDICTED: Rattus norvegicus similar to HSPC043 protein (RGD1307983), mRNA [XM_001061972]                                                                  | <b>9,299</b> |
| PlekM2     | Rattus norvegicus pleckstrin homology domain containing, family M (with RUN domain) member 2 (PlekM2), mRNA [NM_001191767]                                 | <b>9,297</b> |

|           |                                                                                                                                                                             |       |
|-----------|-----------------------------------------------------------------------------------------------------------------------------------------------------------------------------|-------|
| Fut11     | Rattus norvegicus fucosyltransferase 11 (alpha (1,3) fucosyltransferase) (Fut11), mRNA [NM_173308]                                                                          | 9,297 |
| 0         | Rattus norvegicus similar to Peptidyl-prolyl cis-trans isomerase A (PPIase) (Rotamase) (Cyclophilin A) (Cyclosporin A-binding protein) (SP18) (LOC314776), mRNA [XM_235075] | 9,296 |
| LOC690319 | PREDICTED: Rattus norvegicus similar to Alpha-1-antitrypsin-related protein precursor (LOC690319), mRNA [XM_001074075]                                                      | 9,296 |
| Ggn       | Rattus norvegicus gametogenetin (Ggn), mRNA [NM_001013065]                                                                                                                  | 9,296 |
| Polr1a    | Rattus norvegicus polymerase (RNA) I polypeptide A (Polr1a), mRNA [NM_031772]                                                                                               | 9,294 |
| Snx13     | Rattus norvegicus sorting nexin 13 (Snx13), mRNA [NM_001108708]                                                                                                             | 9,293 |
| Slc16a5   | Rattus norvegicus solute carrier family 16, member 5 (monocarboxylic acid transporter 6) (Slc16a5), mRNA [NM_001109568]                                                     | 9,292 |
| Hcn2      | Rattus norvegicus hyperpolarization activated cyclic nucleotide-gated potassium channel 2 (Hcn2), mRNA [NM_053684]                                                          | 9,290 |
| Rasl11b   | Rattus norvegicus RAS-like family 11 member B (Rasl11b), mRNA [NM_001002830]                                                                                                | 9,289 |
| 0         | FQ076898 Rattus norvegicus brain Sprague-Dawley Rattus norvegicus cDNA 5', mRNA sequence [FQ076898]                                                                         | 9,288 |
| Qpctl     | Rattus norvegicus glutaminyl-peptide cyclotransferase-like (Qpctl), mRNA [NM_001106230]                                                                                     | 9,288 |
| 0         | Uncharacterized protein [Source:UniProtKB/TrEMBL;Acc:D3ZAC0] [ENSRNOT00000036112]                                                                                           | 9,288 |
| 0         | Ryanodine receptor 1 [Source:UniProtKB/TrEMBL;Acc:O35208] [ENSRNOT00000027893]                                                                                              | 9,288 |
| Cdk4      | Rattus norvegicus cyclin-dependent kinase 4 (Cdk4), mRNA [NM_053593]                                                                                                        | 9,286 |
| 0         | Unknown                                                                                                                                                                     | 9,286 |
| 0         | Unknown                                                                                                                                                                     | 9,285 |
| Pcdhga9   | Rattus norvegicus protocadherin gamma subfamily A, 9 (Pcdhga9), mRNA [NM_001037158]                                                                                         | 9,285 |
| 0         | Rattus norvegicus TL0AAA57YH24 mRNA sequence. [FQ212370]                                                                                                                    | 9,284 |
| LOC501296 | PREDICTED: Rattus norvegicus hypothetical gene supported by BC059164 (LOC501296), partial mRNA [XM_001081221]                                                               | 9,284 |
| LOC679383 | Rattus norvegicus similar to DNA segment, Chr 5, ERATO Doi 135, expressed (LOC679383), mRNA [NM_001128287]                                                                  | 9,283 |
| Kcnt2     | Rattus norvegicus potassium channel, subfamily T, member 2 (Kcnt2), mRNA [NM_198762]                                                                                        | 9,283 |
| Zbtb43    | Rattus norvegicus zinc finger and BTB domain containing 43 (Zbtb43), mRNA [NM_001012094]                                                                                    | 9,283 |
| Cops8     | Rattus norvegicus COP9 constitutive photomorphogenic homolog subunit 8 (Arabidopsis) (Cops8), mRNA [NM_001013227]                                                           | 9,283 |
| 0         | Rattus norvegicus similar to glyceraldehyde-3-phosphate dehydrogenase (phosphorylating) (EC 1.2.1.12) - mouse (LOC298960), mRNA [XM_234091]                                 | 9,282 |
| Ammecr1l  | Rattus norvegicus AMME chromosomal region gene 1-like (Ammecr1l), mRNA [NM_001107399]                                                                                       | 9,282 |
| Extl2     | Rattus norvegicus exostoses (multiple)-like 2 (Extl2), mRNA [NM_001100704]                                                                                                  | 9,281 |
| Unc45b    | Rattus norvegicus unc-45 homolog B (C. elegans) (Unc45b), mRNA [NM_001107028]                                                                                               | 9,280 |
| Cdkn2a    | Rattus norvegicus cyclin-dependent kinase inhibitor 2A (Cdkn2a), mRNA [NM_031550]                                                                                           | 9,279 |
| Nus1      | Rattus norvegicus nuclear undecaprenyl pyrophosphate synthase 1 homolog (S. cerevisiae) (Nus1), mRNA [NM_001164157]                                                         | 9,278 |
| Olr1385   | Rattus norvegicus olfactory receptor 1385 (Olr1385), mRNA [NM_214833]                                                                                                       | 9,276 |
| Zbtb48    | Rattus norvegicus zinc finger and BTB domain containing 48 (Zbtb48), mRNA [NM_001013216]                                                                                    | 9,276 |
| Klhl15    | Rattus norvegicus kelch-like 15 (Drosophila) (Klhl15), mRNA [NM_001108021]                                                                                                  | 9,275 |

|              |                                                                                                                                         |       |
|--------------|-----------------------------------------------------------------------------------------------------------------------------------------|-------|
| Egln3        | Rattus norvegicus EGL nine homolog 3 ( <i>C. elegans</i> ) (Egln3), mRNA [NM_019371]                                                    | 9,274 |
| Ift52        | Rattus norvegicus intraflagellar transport 52 homolog ( <i>Chlamydomonas</i> ) (Ift52), mRNA [NM_001177685]                             | 9,273 |
| LOC100363421 | PREDICTED: Rattus norvegicus hypothetical protein LOC100363421 (LOC100363421), mRNA [XM_002726502]                                      | 9,272 |
| Rnf10        | Rattus norvegicus ring finger protein 10 (Rnf10), mRNA [NM_001011904]                                                                   | 9,272 |
| Cldn1        | Rattus norvegicus claudin 1 (Cldn1), mRNA [NM_031699]                                                                                   | 9,271 |
| Nxph4        | Rattus norvegicus neurexophilin 4 (Nxph4), mRNA [NM_021680]                                                                             | 9,270 |
| Lemd2        | Rattus norvegicus LEM domain containing 2 (Lemd2), mRNA [NM_001039032]                                                                  | 9,270 |
| Ap3s1        | Rattus norvegicus adaptor-related protein complex 3, sigma 1 subunit (Ap3s1), mRNA [NM_001106933]                                       | 9,269 |
| Tmem223      | Rattus norvegicus transmembrane protein 223 (Tmem223), mRNA [NM_001191104]                                                              | 9,269 |
| RT1-Bb       | Rattus norvegicus RT1 class II, locus Bb (RT1-Bb), mRNA [NM_001004084]                                                                  | 9,268 |
| Mgat5b       | Rattus norvegicus mannosyl (alpha-1,6-)-glycoprotein beta-1,6-N-acetyl-glucosaminyltransferase, isozyme B (Mgat5b), mRNA [NM_001107068] | 9,267 |
| Lman1l       | Rattus norvegicus lectin, mannose-binding, 1 like (Lman1l), mRNA [NM_001012465]                                                         | 9,266 |
| Erh          | Rattus norvegicus enhancer of rudimentary homolog ( <i>Drosophila</i> ) (Erh), mRNA [NM_001109442]                                      | 9,265 |
| Depdc6       | PREDICTED: Rattus norvegicus DEP domain containing 6 (Depdc6), mRNA [XM_001066889]                                                      | 9,264 |
| RGD1305939   | Rattus norvegicus hypothetical LOC300074 (RGD1305939), mRNA [NM_001130581]                                                              | 9,263 |
| Cass4        | Rattus norvegicus Cas scaffolding protein family member 4 (Cass4), mRNA [NM_001191744]                                                  | 9,263 |
| Emp1         | Rattus norvegicus epithelial membrane protein 1 (Emp1), mRNA [NM_012843]                                                                | 9,263 |
| Dpysl3       | Rattus norvegicus dihydropyrimidinase-like 3 (Dpysl3), mRNA [NM_012934]                                                                 | 9,261 |
| 0            | Unknown                                                                                                                                 | 9,261 |
| RGD1565512   | Rattus norvegicus similar to hypothetical protein 4932418E24 (RGD1565512), mRNA [NM_001134617]                                          | 9,261 |
| Klhdc3       | Rattus norvegicus kelch domain containing 3 (Klhdc3), mRNA [NM_001012203]                                                               | 9,259 |
| 0            | Unknown                                                                                                                                 | 9,258 |
| MGC112715    | Rattus norvegicus hypothetical protein LOC690899 (MGC112715), mRNA [NM_001044300]                                                       | 9,258 |
| 0            | ATG2 autophagy related 2 homolog B ( <i>S. cerevisiae</i> ) Gene [Source:MGI Symbol;Acc:MGI:1923809] [ENSRNOT00000006131]               | 9,257 |
| Gphb5        | Rattus norvegicus glycoprotein hormone beta 5 (Gphb5), mRNA [NM_001007013]                                                              | 9,257 |
| Trrap        | Rattus norvegicus transformation/transcription domain-associated protein (Trrap), mRNA [NM_001105907]                                   | 9,256 |
| Itgb5        | Rattus norvegicus integrin, beta 5 (Itgb5), mRNA [NM_147139]                                                                            | 9,256 |
| LOC304239    | Uncharacterized protein [Source:UniProtKB/TrEMBL;Acc:D3ZH07] [ENSRNOT00000001187]                                                       | 9,255 |
| 0            | Rattus norvegicus similar to spindlin (LOC294635), mRNA [XM_226656]                                                                     | 9,253 |
| Vps33a       | Rattus norvegicus vacuolar protein sorting 33 homolog A ( <i>S. cerevisiae</i> ) (Vps33a), mRNA [NM_022961]                             | 9,253 |
| Myof         | Rattus norvegicus myoferlin (Myof), mRNA [NM_001191636]                                                                                 | 9,253 |
| LOC685385    | Uncharacterized protein [Source:UniProtKB/TrEMBL;Acc:D3ZPS5] [ENSRNOT00000056523]                                                       | 9,252 |
| Srgap2       | Rattus norvegicus SLIT-ROBO Rho GTPase activating protein 2 (Srgap2), mRNA [NM_001134958]                                               | 9,252 |
| 0            | Unknown                                                                                                                                 | 9,252 |

|            |                                                                                                                                                               |       |
|------------|---------------------------------------------------------------------------------------------------------------------------------------------------------------|-------|
| Oxsr1      | Rattus norvegicus oxidative-stress responsive 1 (Oxsr1), mRNA [NM_001108194]                                                                                  | 9,252 |
| Sec24c     | Rattus norvegicus SEC24 family, member C (S. cerevisiae) (Sec24c), mRNA [NM_001109456]                                                                        | 9,251 |
| 0          | Unknown                                                                                                                                                       | 9,250 |
| Gpr156     | Rattus norvegicus G protein-coupled receptor 156 (Gpr156), mRNA [NM_153295]                                                                                   | 9,250 |
| 0          | Unknown                                                                                                                                                       | 9,249 |
| 0          | Unknown                                                                                                                                                       | 9,248 |
| 0          | Q84NG9_VITVI (Q84NG9) 2S albumin, partial (6%) [TC640666]                                                                                                     | 9,247 |
| RGD1560859 | PREDICTED: Rattus norvegicus similar to 2300003P22Rik protein (RGD1560859), miscRNA [XR_008965]                                                               | 9,246 |
| Riok3      | Rattus norvegicus RIO kinase 3 (yeast) (Riok3), mRNA [NM_001108423]                                                                                           | 9,246 |
| Cops2      | Rattus norvegicus COP9 constitutive photomorphogenic homolog subunit 2 (Arabidopsis) (Cops2), mRNA [NM_153297]                                                | 9,244 |
| Paqr6      | Rattus norvegicus progesterin and adipoQ receptor family member VI (Paqr6), mRNA [NM_001191077]                                                               | 9,243 |
| Ormdl2     | Rattus norvegicus ORM1-like 2 (S. cerevisiae) (Ormdl2), mRNA [NM_001105940]                                                                                   | 9,241 |
| 0          | Uncharacterized protein [Source:UniProtKB/TrEMBL;Acc:D4A3V3] [ENSRNOT00000011481]                                                                             | 9,241 |
| 0          | Unknown                                                                                                                                                       | 9,241 |
| LOC690130  | PREDICTED: Rattus norvegicus similar to ras homolog gene family, member f (LOC690130), mRNA [XM_001073389]                                                    | 9,240 |
| 0          | Unknown                                                                                                                                                       | 9,240 |
| 0          | Unknown                                                                                                                                                       | 9,240 |
| Lrrc40     | Rattus norvegicus leucine rich repeat containing 40 (Lrrc40), mRNA [NM_001034926]                                                                             | 9,240 |
| Snap23     | Rattus norvegicus synaptosomal-associated protein 23 (Snap23), mRNA [NM_022689]                                                                               | 9,236 |
| RGD1561777 | PREDICTED: Rattus norvegicus similar to Na <sup>+</sup> dependent glucose transporter 1 (RGD1561777), mRNA [XM_001063079]                                     | 9,235 |
| Stk11      | Rattus norvegicus serine/threonine kinase 11 (Stk11), mRNA [NM_001108069]                                                                                     | 9,233 |
| Erp44      | Rattus norvegicus endoplasmic reticulum protein 44 (Erp44), mRNA [NM_001008317]                                                                               | 9,233 |
| Atrn       | Rattus norvegicus attractin (Atrn), mRNA [NM_031351]                                                                                                          | 9,232 |
| Med23      | Mediator of RNA polymerase II transcription subunit 23 [Source:UniProtKB/Swiss-Prot;Acc:Q5EB59] [ENSRNOT00000018404]                                          | 9,231 |
| RGD1562874 | PREDICTED: Rattus norvegicus similar to hypothetical protein DKFZp434E1818.1 - human (fragment) (RGD1562874), mRNA [XM_001077456]                             | 9,230 |
| Api5       | Rattus norvegicus apoptosis inhibitor 5 (Api5), mRNA [NM_001127379]                                                                                           | 9,226 |
| Atad3a     | Rattus norvegicus ATPase family, AAA domain containing 3A (Atad3a), nuclear gene encoding mitochondrial protein, mRNA [NM_001034922]                          | 9,226 |
| Nos1       | Rattus norvegicus nitric oxide synthase 1, neuronal (Nos1), mRNA [NM_052799]                                                                                  | 9,223 |
| Dirc2      | Rattus norvegicus disrupted in renal carcinoma 2 (human) (Dirc2), mRNA [NM_001012017]                                                                         | 9,222 |
| 0          | Uncharacterized protein [Source:UniProtKB/TrEMBL;Acc:D3ZHU8] [ENSRNOT00000001891]                                                                             | 9,220 |
| Fam76a     | Rattus norvegicus family with sequence similarity 76, member A (Fam76a), mRNA [NM_001108686]                                                                  | 9,218 |
| LOC684441  | PREDICTED: Rattus norvegicus similar to Peptidyl-prolyl cis-trans isomerase NIMA-interacting 4 (Rotamase Pin4) (PPIase Pin4) (LOC684441), miscRNA [XR_086666] | 9,218 |
| 0          | Uncharacterized protein [Source:UniProtKB/TrEMBL;Acc:D3ZK13] [ENSRNOT000000061879]                                                                            | 9,218 |

|            |                                                                                                                                             |              |
|------------|---------------------------------------------------------------------------------------------------------------------------------------------|--------------|
| Nudcd3     | Rattus norvegicus NudC domain containing 3 (Nudcd3), mRNA [NM_001103362]                                                                    | <b>9,217</b> |
| Tmem184a   | Rattus norvegicus transmembrane protein 184A (Tmem184a), mRNA [NM_001025413]                                                                | <b>9,216</b> |
| RGD1563917 | PREDICTED: Rattus norvegicus similar to Nuclear autoantigen Sp-100 (Speckled 100 kDa) (RGD1563917), mRNA [XM_001063206]                     | <b>9,216</b> |
| Luc7l2     | Rattus norvegicus LUC7-like 2 ( <i>S. cerevisiae</i> ) (Luc7l2), mRNA [NM_001107853]                                                        | <b>9,215</b> |
| Entpd4     | Rattus norvegicus ectonucleoside triphosphate diphosphohydrolase 4 (Entpd4), mRNA [NM_001108384]                                            | <b>9,215</b> |
| 0          | Rattus norvegicus similar to glyceraldehyde-3-phosphate dehydrogenase (phosphorylating) (EC 1.2.1.12) - mouse (LOC305630), mRNA [XM_223741] | <b>9,215</b> |
| Cntf       | Rattus norvegicus ciliary neurotrophic factor (Cntf), mRNA [NM_013166]                                                                      | <b>9,211</b> |
| 0          | Unknown                                                                                                                                     | <b>9,210</b> |
| Fry        | Rattus norvegicus furry homolog ( <i>Drosophila</i> ) (Fry), mRNA [NM_001170398]                                                            | <b>9,208</b> |
| Ccdc44     | Rattus norvegicus coiled-coil domain containing 44 (Ccdc44), mRNA [NM_001108302]                                                            | <b>9,207</b> |
| Lancl2     | Rattus norvegicus LanC lantibiotic synthetase component C-like 2 (bacterial) (Lancl2), mRNA [NM_001014187]                                  | <b>9,206</b> |
| Gsg1l      | PREDICTED: Rattus norvegicus GSG1-like (Gsg1l), mRNA [XM_574558]                                                                            | <b>9,205</b> |
| Aof1       | Rattus norvegicus amine oxidase (flavin containing) domain 1 (Aof1), mRNA [NM_001107343]                                                    | <b>9,203</b> |
| 0          | Uncharacterized protein [Source:UniProtKB/TrEMBL;Acc:D3ZQW1] [ENSRNOT00000015065]                                                           | <b>9,202</b> |
| Chrm2      | Rattus norvegicus cholinergic receptor, muscarinic 2 (Chrm2), mRNA [NM_031016]                                                              | <b>9,202</b> |
| Slc24a4    | Rattus norvegicus solute carrier family 24 (sodium/potassium/calcium exchanger), member 4 (Slc24a4), mRNA [NM_001108051]                    | <b>9,202</b> |
| Zdhhc13    | Rattus norvegicus zinc finger, DHHC-type containing 13 (Zdhhc13), mRNA [NM_001039037]                                                       | <b>9,201</b> |
| Dbn1d1     | Rattus norvegicus dysbindin (dystrobrevin binding protein 1) domain containing 1 (Dbn1d1), mRNA [NM_001014156]                              | <b>9,200</b> |
| Rab32      | Rattus norvegicus RAB32, member RAS oncogene family (Rab32), mRNA [NM_001108902]                                                            | <b>9,199</b> |
| Gde1       | Rattus norvegicus glycerophosphodiester phosphodiesterase 1 (Gde1), mRNA [NM_032615]                                                        | <b>9,199</b> |
| Tmem178    | Rattus norvegicus transmembrane protein 178 (Tmem178), mRNA [NM_001004282]                                                                  | <b>9,198</b> |
| 0          | Rattus norvegicus similar to caspase 3, apoptosis related cysteine protease (LOC292581), mRNA [XM_218253]                                   | <b>9,198</b> |
| Map3k2     | Rattus norvegicus mitogen activated protein kinase kinase kinase 2 (Map3k2), mRNA [NM_138503]                                               | <b>9,197</b> |
| Cyp2b3     | Rattus norvegicus cytochrome P450, family 2, subfamily b, polypeptide 3 (Cyp2b3), mRNA [NM_173294]                                          | <b>9,197</b> |
| 0          | Unknown                                                                                                                                     | <b>9,195</b> |
| Strn3      | Rattus norvegicus striatin, calmodulin binding protein 3 (Strn3), mRNA [NM_001029897]                                                       | <b>9,195</b> |
| Pcdhb8     | Rattus norvegicus protocadherin beta 8 (Pcdhb8), mRNA [NM_001014779]                                                                        | <b>9,195</b> |
| Zc3h6      | Rattus norvegicus zinc finger CCCH type containing 6 (Zc3h6), mRNA [NM_001107772]                                                           | <b>9,194</b> |
| Fam102b    | Rattus norvegicus family with sequence similarity 102, member B (Fam102b), mRNA [NM_001163568]                                              | <b>9,191</b> |
| 0          | Unknown                                                                                                                                     | <b>9,191</b> |
| Gstt1      | Rattus norvegicus glutathione S-transferase theta 1 (Gstt1), mRNA [NM_053293]                                                               | <b>9,190</b> |
| Sec62      | Rattus norvegicus SEC62 homolog ( <i>S. cerevisiae</i> ) (Sec62), mRNA [NM_001034129]                                                       | <b>9,190</b> |
| Lrp11      | Rattus norvegicus low density lipoprotein receptor-related protein 11 (Lrp11), mRNA [NM_001106217]                                          | <b>9,188</b> |



|              |                                                                                                                                |       |
|--------------|--------------------------------------------------------------------------------------------------------------------------------|-------|
| 0            | Unknown                                                                                                                        | 9,186 |
| LOC100188984 | Rattus norvegicus hypothetical protein LOC100188984 (LOC100188984), mRNA [NM_001134998]                                        | 9,185 |
| Atg4b        | Rattus norvegicus ATG4 autophagy related 4 homolog B (S. cerevisiae) (Atg4b), mRNA [NM_001025711]                              | 9,185 |
| Calml4       | Rattus norvegicus calmodulin-like 4 (Calml4), mRNA [NM_001127575]                                                              | 9,185 |
| Itga1        | Rattus norvegicus integrin, alpha 1 (Itga1), mRNA [NM_030994]                                                                  | 9,181 |
| LOC100361845 | PREDICTED: Rattus norvegicus hypothetical protein LOC100361845 (LOC100361845), mRNA [XM_002729636]                             | 9,179 |
| Mbd3         | Rattus norvegicus methyl-CpG binding domain protein 3 (Mbd3), mRNA [NM_001108735]                                              | 9,179 |
| Mical3       | Rattus norvegicus microtubule associated monooxygenase, calponin and LIM domain containing 3 (Mical3), mRNA [NM_001191085]     | 9,177 |
| RGD1565023   | PREDICTED: Rattus norvegicus similar to Suppressor of S. cerevisiae gcr2 (RGD1565023), mRNA [XM_001055900]                     | 9,174 |
| LOC678966    | PREDICTED: Rattus norvegicus hypothetical protein LOC678966 (LOC678966), partial mRNA [XM_001054033]                           | 9,173 |
| 0            | Unknown                                                                                                                        | 9,169 |
| Srf          | Rattus norvegicus serum response factor (c-fos serum response element-binding transcription factor) (Srf), mRNA [NM_001109302] | 9,169 |
| LOC691632    | PREDICTED: Rattus norvegicus similar to MIC2 like 1 (LOC691632), mRNA [XM_001079095]                                           | 9,167 |
| Tor2a        | Rattus norvegicus torsin family 2, member A (Tor2a), mRNA [NM_001007744]                                                       | 9,165 |
| Pln          | Rattus norvegicus phospholamban (Pln), mRNA [NM_022707]                                                                        | 9,165 |
| 0            | Rattus norvegicus chromosome 7, 20 clones, strain BN/SsNHsdMCW RNOR03304384, whole genome shotgun sequence [AABR03055433]      | 9,164 |
| Vps13a       | Rattus norvegicus vacuolar protein sorting 13 homolog A (S. cerevisiae) (Vps13a), mRNA [NM_001100975]                          | 9,164 |
| Gla          | Rattus norvegicus galactosidase, alpha (Gla), mRNA [NM_001108820]                                                              | 9,163 |
| Ndrp2        | Rattus norvegicus N-myc downstream regulated gene 2 (Ndrp2), mRNA [NM_133583]                                                  | 9,163 |
| 0            | Uncharacterized protein [Source:UniProtKB/TrEMBL;Acc:D3ZX00] [ENSRNOT00000046987]                                              | 9,163 |
| Gucy1b2      | Rattus norvegicus guanylate cyclase 1, soluble, beta 2 (Gucy1b2), mRNA [NM_012770]                                             | 9,162 |
| LOC682097    | PREDICTED: Rattus norvegicus similar to TBP-associated factor 4 (LOC682097), miscRNA [XR_086218]                               | 9,159 |
| 0            | Unknown                                                                                                                        | 9,159 |
| Hsd3b5       | Rattus norvegicus hydroxy-delta-5-steroid dehydrogenase, 3 beta- and steroid delta-isomerase 5 (Hsd3b5), mRNA [NM_012584]      | 9,158 |
| LOC680531    | Rattus norvegicus similar to CG3880-PA (LOC680531), mRNA [NM_001109418]                                                        | 9,158 |
| Hs3st6       | Rattus norvegicus heparan sulfate (glucosamine) 3-O-sulfotransferase 6 (Hs3st6), mRNA [NM_001109450]                           | 9,156 |
| Dcps         | Rattus norvegicus decapping enzyme, scavenger (Dcps), mRNA [NM_153302]                                                         | 9,156 |
| Rab14        | Rattus norvegicus RAB14, member RAS oncogene family (Rab14), mRNA [NM_053589]                                                  | 9,155 |
| U2surp       | PREDICTED: Rattus norvegicus similar to CG9346-PA, transcript variant 1 (RGD1307882), mRNA [XM_002729954]                      | 9,155 |
| Tmc5         | Rattus norvegicus transmembrane channel-like 5 (Tmc5), mRNA [NM_001012216]                                                     | 9,153 |
| Rassf8       | Rattus norvegicus Ras association (RalGDS/AF-6) domain family (N-terminal) member 8 (Rassf8), mRNA [NM_001191753]              | 9,152 |
| MGC95208     | Rattus norvegicus similar to 4930453N24Rik protein (MGC95208), mRNA [NM_001005552]                                             | 9,150 |
| Dhx8         | Rattus norvegicus DEAH (Asp-Glu-Ala-His) box polypeptide 8 (Dhx8), mRNA [NM_001047844]                                         | 9,149 |
| Rab711       | Rattus norvegicus RAB7, member RAS oncogene family-like 1 (Rab711), mRNA [NM_133590]                                           | 9,149 |

|            |                                                                                                                                        |       |
|------------|----------------------------------------------------------------------------------------------------------------------------------------|-------|
| Trim27     | Rattus norvegicus tripartite motif-containing 27 (Trim27), transcript variant 1, mRNA [NM_001134974]                                   | 9,149 |
| 0          | Unknown                                                                                                                                | 9,148 |
| RGD1560737 | PREDICTED: Rattus norvegicus similar to elicitor-like mating protein M81 (RGD1560737), mRNA [XM_225445]                                | 9,147 |
| Hbp1       | Rattus norvegicus HMG-box transcription factor 1 (Hbp1), mRNA [NM_013221]                                                              | 9,144 |
| 0          | Unknown                                                                                                                                | 9,143 |
| Rnf144b    | Rattus norvegicus ring finger protein 144B (Rnf144b), mRNA [NM_001108881]                                                              | 9,143 |
| Odc1       | Rattus norvegicus ornithine decarboxylase 1 (Odc1), mRNA [NM_012615]                                                                   | 9,142 |
| 0          | Unknown                                                                                                                                | 9,140 |
| RGD1308644 | RCG50901Uncharacterized protein [Source:UniProtKB/TrEMBL;Acc:D3ZAP3] [ENSRNOT00000031717]                                              | 9,140 |
| Olr50      | Rattus norvegicus olfactory receptor 50 (Olr50), mRNA [NM_001000131]                                                                   | 9,139 |
| 0          | Unknown                                                                                                                                | 9,139 |
| Pcdh9      | Rattus norvegicus protocadherin 9 (Pcdh9), mRNA [NM_001191688]                                                                         | 9,139 |
| LOC680430  | PREDICTED: Rattus norvegicus similar to germinal histone H4 gene (LOC680430), mRNA [XM_001057149]                                      | 9,138 |
| Krt80      | Rattus norvegicus keratin 80 (Krt80), mRNA [NM_001008815]                                                                              | 9,138 |
| 0          | PREDICTED: Rattus norvegicus similar to TDPOZ2 (RGD1562545), mRNA [XM_001061198]                                                       | 9,138 |
| Acin1      | Rattus norvegicus apoptotic chromatin condensation inducer 1 (Acin1), mRNA [NM_001170468]                                              | 9,137 |
| Rhoh       | Rattus norvegicus ras homolog gene family, member H (Rhoh), mRNA [NM_001013430]                                                        | 9,135 |
| Armcx3     | Rattus norvegicus armadillo repeat containing, X-linked 3 (Armcx3), mRNA [NM_001014273]                                                | 9,134 |
| 0          | ERG6_MAGGR (Q5EN22) Sterol 24-C-methyltransferase (Delta(24)-sterol C-methyltransferase) , partial (5%) [TC583516]                     | 9,134 |
| Ift52      | Rattus norvegicus intraflagellar transport 52 homolog (Chlamydomonas) (Ift52), mRNA [NM_001177685]                                     | 9,133 |
| LOC289378  | Rattus norvegicus similar to B0432.8 (LOC289378), mRNA [NM_001105987]                                                                  | 9,133 |
| RGD1565819 | Rattus norvegicus similar to C20orf174 (RGD1565819), mRNA [NM_001171096]                                                               | 9,133 |
| 0          | Unknown                                                                                                                                | 9,133 |
| RGD1565767 | Ribosomal protein L15 [Source:UniProtKB/TrEMBL;Acc:D3ZF52] [ENSRNOT00000032528]                                                        | 9,132 |
| Ccdc64     | Rattus norvegicus coiled-coil domain containing 64 (Ccdc64), mRNA [NM_001191667]                                                       | 9,132 |
| 0          | Unknown                                                                                                                                | 9,131 |
| Fam126b    | Rattus norvegicus family with sequence similarity 126, member B (Fam126b), mRNA [NM_001025710]                                         | 9,131 |
| Tmem40     | Rattus norvegicus transmembrane protein 40 (Tmem40), mRNA [NM_001191573]                                                               | 9,130 |
| Hsd17b1    | Rattus norvegicus hydroxysteroid (17-beta) dehydrogenase 1 (Hsd17b1), mRNA [NM_012851]                                                 | 9,128 |
| Ccdc89     | Rattus norvegicus coiled-coil domain containing 89 (Ccdc89), mRNA [NM_001134833]                                                       | 9,127 |
| Tmcc2      | Similar to RIKEN cDNA 1110063G11 (Predicted)Uncharacterized protein [Source:UniProtKB/TrEMBL;Acc:D3ZE26] [ENSRNOT00000000036]          | 9,125 |
| Rdh13      | Rattus norvegicus retinol dehydrogenase 13 (all-trans/9-cis) (Rdh13), nuclear gene encoding mitochondrial protein, mRNA [NM_001108468] | 9,124 |
| 0          | Unknown                                                                                                                                | 9,123 |
| Inhbb      | Rattus norvegicus inhibin beta-B (Inhbb), mRNA [NM_080771]                                                                             | 9,121 |

|           |                                                                                                                    |       |
|-----------|--------------------------------------------------------------------------------------------------------------------|-------|
| Pank3     | Rattus norvegicus pantothenate kinase 3 (Pank3), mRNA [NM_001108272]                                               | 9,120 |
| 0         | Unknown                                                                                                            | 9,120 |
| Vav3      | Rattus norvegicus vav 3 guanine nucleotide exchange factor (Vav3), mRNA [NM_001191714]                             | 9,118 |
| Mobkl3    | Rattus norvegicus MOB1, Mps One Binder kinase activator-like 3 (yeast) (Mobkl3), mRNA [NM_133528]                  | 9,118 |
| Pqlc2     | Rattus norvegicus PQ loop repeat containing 2 (Pqlc2), mRNA [NM_001108689]                                         | 9,115 |
| Gldn      | Rattus norvegicus gliomedin (Gldn), mRNA [NM_181382]                                                               | 9,115 |
| Dnaja4    | Rattus norvegicus DnaJ (Hsp40) homolog, subfamily A, member 4 (Dnaja4), mRNA [NM_001025411]                        | 9,115 |
| Pih1d2    | Rattus norvegicus PIH1 domain containing 2 (Pih1d2), mRNA [NM_001191793]                                           | 9,112 |
| Paqr8     | Rattus norvegicus progesterin and adipoQ receptor family member VIII (Paqr8), mRNA [NM_001014099]                  | 9,111 |
| LOC679140 | PREDICTED: Rattus norvegicus similar to exosome component 1, transcript variant 1 (LOC679140), mRNA [XM_001054866] | 9,110 |
| 0         | Unknown                                                                                                            | 9,108 |
| Trub2     | Rattus norvegicus TruB pseudouridine (psi) synthase homolog 2 (E. coli) (Trub2), mRNA [NM_001014257]               | 9,108 |
| 0         | Histone H3 [Source:UniProtKB/TrEMBL;Acc:D3ZXC3] [ENSRNOT00000046278]                                               | 9,107 |
| Mex3c     | Rattus norvegicus mex-3 homolog C (C. elegans) (Mex3c), mRNA [NM_001107377]                                        | 9,104 |
| Fam46a    | Rattus norvegicus family with sequence similarity 46, member A (Fam46a), mRNA [NM_001106844]                       | 9,100 |
| 0         | Unknown                                                                                                            | 9,100 |
| 0         | Uncharacterized protein [Source:UniProtKB/TrEMBL;Acc:D3ZJ63] [ENSRNOT00000042360]                                  | 9,099 |
| LOC682968 | PREDICTED: Rattus norvegicus similar to Retinal homeobox protein Rx (DRx1) (DRx) (LOC682968), mRNA [XM_001063896]  | 9,099 |
| Itsn1     | Rattus norvegicus intersectin 1 (SH3 domain protein) (Itsn1), transcript variant 2, mRNA [NM_019227]               | 9,098 |
| 0         | Unknown                                                                                                            | 9,097 |
| 0         | PREDICTED: Rattus norvegicus up-regulator of carnitine transporter, OCTN2 (LOC303140), mRNA [XM_001073573]         | 9,096 |
| Zcchc2    | Rattus norvegicus zinc finger, CCHC domain containing 2 (Zcchc2), mRNA [NM_001122677]                              | 9,095 |
| 0         | probable tRNA pseudouridine synthase 2 [Source:RefSeq peptide;Acc:NP_001014279] [ENSRNOT00000040550]               | 9,095 |
| Mtf1      | Rattus norvegicus metal-regulatory transcription factor 1 (Mtf1), mRNA [NM_001108677]                              | 9,095 |
| Nrbp2     | Rattus norvegicus nuclear receptor binding protein 2 (Nrbp2), mRNA [NM_001135007]                                  | 9,092 |
| LOC691572 | PREDICTED: Rattus norvegicus hypothetical protein LOC691572 (LOC691572), mRNA [XM_001078882]                       | 9,092 |
| 0         | Unknown                                                                                                            | 9,089 |
| Nrxn1     | Rattus norvegicus neurexin 1 (Nrxn1), mRNA [NM_021767]                                                             | 9,087 |
| 0         | Q6MG19_RAT (Q6MG19) Discoidin domain receptor family, member 1, partial (18%) [TC622836]                           | 9,086 |
| Prss35    | Rattus norvegicus protease, serine, 35 (Prss35), mRNA [NM_001008560]                                               | 9,085 |
| Ipo11     | PREDICTED: Rattus norvegicus importin 11 (Ipo11), mRNA [XM_002725887]                                              | 9,084 |
| 0         | Unknown                                                                                                            | 9,084 |
| G6pc3     | Rattus norvegicus glucose 6 phosphatase, catalytic, 3 (G6pc3), mRNA [NM_176077]                                    | 9,084 |
| Pdxdc1    | Rattus norvegicus pyridoxal-dependent decarboxylase domain containing 1 (Pdxdc1), mRNA [NM_001134961]              | 9,084 |

|              |                                                                                                                                                           |       |
|--------------|-----------------------------------------------------------------------------------------------------------------------------------------------------------|-------|
| RGD1564308   | Uncharacterized protein [Source:UniProtKB/TrEMBL;Acc:D3ZVL4] [ENSRNOT00000059317]                                                                         | 9,080 |
| LOC100363193 | Rattus norvegicus LRRGT00076-like (LOC100363193), mRNA [NM_001177824]                                                                                     | 9,076 |
| 0            | Unknown                                                                                                                                                   | 9,075 |
| Osbp         | Rattus norvegicus oxysterol binding protein (Osbp), mRNA [NM_001108927]                                                                                   | 9,075 |
| Mark1        | Rattus norvegicus MAP/microtubule affinity-regulating kinase 1 (Mark1), mRNA [NM_053947]                                                                  | 9,074 |
| Cat          | Rattus norvegicus catalase (Cat), mRNA [NM_012520]                                                                                                        | 9,074 |
| Sgef         | Uncharacterized protein [Source:UniProtKB/TrEMBL;Acc:D4A1D2] [ENSRNOT00000019553]                                                                         | 9,073 |
| Ssr1         | Rattus norvegicus signal sequence receptor, alpha (Ssr1), mRNA [NM_001008891]                                                                             | 9,073 |
| Pde4d        | Rattus norvegicus phosphodiesterase 4D, cAMP-specific (phosphodiesterase E3 dunce homolog, Drosophila) (Pde4d), transcript variant 1, mRNA [NM_001113328] | 9,072 |
| 0            | Rattus norvegicus TL0ADA51YN11 mRNA sequence. [FQ228778]                                                                                                  | 9,070 |
| RGD1560695   | PREDICTED: Rattus norvegicus similar to hypothetical protein 4930474N05 (RGD1560695), mRNA [XM_001074018]                                                 | 9,069 |
| RGD1306410   | Rattus norvegicus similar to CG14980-PB (RGD1306410), mRNA [NM_001014126]                                                                                 | 9,068 |
| 0            | Unknown                                                                                                                                                   | 9,067 |
| LOC683516    | PREDICTED: Rattus norvegicus similar to Zinc finger X-linked protein ZXDB (LOC683516), partial mRNA [XM_001066304]                                        | 9,066 |
| LOC689257    | Uncharacterized protein [Source:UniProtKB/TrEMBL;Acc:D3ZF17] [ENSRNOT00000058586]                                                                         | 9,065 |
| Tnfrsf1b     | Tumor necrosis factor receptor superfamily member 1B [Source:UniProtKB/Swiss-Prot;Acc:Q80WY6] [ENSRNOT00000022478]                                        | 9,065 |
| RGD1559864   | PREDICTED: Rattus norvegicus similar to mKIAA1045 protein, transcript variant 2 (RGD1559864), mRNA [XM_575808]                                            | 9,064 |
| Osbp11       | Rattus norvegicus oxysterol binding protein-like 11 (Osbp11), mRNA [NM_001107090]                                                                         | 9,062 |
| Bdh1         | Rattus norvegicus 3-hydroxybutyrate dehydrogenase, type 1 (Bdh1), nuclear gene encoding mitochondrial protein, mRNA [NM_053995]                           | 9,062 |
| Dis3l2       | Rattus norvegicus DIS3 mitotic control homolog (S. cerevisiae)-like 2 (Dis3l2), transcript variant 1, mRNA [NM_001109007]                                 | 9,062 |
| Lppr1        | Rattus norvegicus lipid phosphate phosphatase-related protein type 1 (Lppr1), mRNA [NM_201271]                                                            | 9,059 |
| 0            | Uncharacterized protein [Source:UniProtKB/TrEMBL;Acc:D3ZBK3] [ENSRNOT00000060360]                                                                         | 9,059 |
| RGD1310311   | Rattus norvegicus similar to chromosome 14 open reading frame 104 (RGD1310311), mRNA [NM_001014197]                                                       | 9,059 |
| Kcnk2        | Rattus norvegicus potassium channel, subfamily K, member 2 (Kcnk2), transcript variant 1, mRNA [NM_172041]                                                | 9,058 |
| Vom2r55      | Rattus norvegicus vomeronasal 2 receptor, 55 (Vom2r55), mRNA [NM_001099495]                                                                               | 9,054 |
| 0            | Unknown                                                                                                                                                   | 9,054 |
| Sesn1        | Rattus norvegicus sestrin 1 (Sesn1), mRNA [NM_001106396]                                                                                                  | 9,053 |
| Olr1286      | Rattus norvegicus olfactory receptor 1286 (Olr1286), mRNA [NM_001000799]                                                                                  | 9,049 |
| N-pac        | Putative oxidoreductase GLYR1 [Source:UniProtKB/Swiss-Prot;Acc:Q5RKH0] [ENSRNOT00000004159]                                                               | 9,049 |
| 0            | Uncharacterized protein [Source:UniProtKB/TrEMBL;Acc:D3ZQ92] [ENSRNOT00000026116]                                                                         | 9,048 |
| Adcy1        | Rattus norvegicus adenylate cyclase 1 (brain) (Adcy1), mRNA [NM_001107239]                                                                                | 9,047 |
| LOC691543    | Rattus norvegicus hypothetical protein LOC691543 (LOC691543), mRNA [NM_001109645]                                                                         | 9,047 |
| Slc27a2      | Rattus norvegicus solute carrier family 27 (fatty acid transporter), member 2 (Slc27a2), mRNA [NM_031736]                                                 | 9,046 |

|              |                                                                                                                                                               |              |
|--------------|---------------------------------------------------------------------------------------------------------------------------------------------------------------|--------------|
| Dars2        | Rattus norvegicus aspartyl-tRNA synthetase 2 (mitochondrial) (Dars2), nuclear gene encoding mitochondrial protein, mRNA [NM_001034143]                        | <b>9,045</b> |
| Sec24c       | Rattus norvegicus SEC24 family, member C (S. cerevisiae) (Sec24c), mRNA [NM_001109456]                                                                        | <b>9,045</b> |
| Elovl6       | Rattus norvegicus ELOVL family member 6, elongation of long chain fatty acids (yeast) (Elovl6), mRNA [NM_134383]                                              | <b>9,041</b> |
| 0            | BC042626 Chmp2b protein {Mus musculus} (exp=-1; wgp=0; cg=0), partial (49%) [TC588602]                                                                        | <b>9,040</b> |
| Gpr89        | Rattus norvegicus G protein-coupled receptor 89 (Gpr89), mRNA [NM_001139486]                                                                                  | <b>9,039</b> |
| 0            | Williams Beuren syndrome chromosome region 27 [Source:RefSeq peptide;Acc:NP_001102969] [ENSRNOT00000002002]                                                   | <b>9,037</b> |
| 0            | Unknown                                                                                                                                                       | <b>9,036</b> |
| Sypl1        | Rattus norvegicus synaptophysin-like 1 (Sypl1), mRNA [NM_001014263]                                                                                           | <b>9,036</b> |
| Kdelr3       | Rattus norvegicus KDEL (Lys-Asp-Glu-Leu) endoplasmic reticulum protein retention receptor 3 (Kdelr3), mRNA [NM_001127546]                                     | <b>9,035</b> |
| Hes5         | Rattus norvegicus hairy and enhancer of split 5 (Drosophila) (Hes5), mRNA [NM_024383]                                                                         | <b>9,035</b> |
| Nkr-p1c      | Rattus norvegicus killer cell lectin-like receptor subfamily B member (Nkr-p1c), mRNA [NM_001040189]                                                          | <b>9,033</b> |
| Sh2d5        | PREDICTED: Rattus norvegicus SH2 domain containing 5 (Sh2d5), mRNA [XM_001070433]                                                                             | <b>9,033</b> |
| 0            | Unknown                                                                                                                                                       | <b>9,032</b> |
| Zfp263       | Rattus norvegicus zinc finger protein 263 (Zfp263), mRNA [NM_001105763]                                                                                       | <b>9,029</b> |
| 0            | Unknown                                                                                                                                                       | <b>9,029</b> |
| LOC100364812 | PREDICTED: Rattus norvegicus hypothetical protein LOC100364812 (LOC100364812), mRNA [XM_002725256]                                                            | <b>9,027</b> |
| Lypla1       | Rattus norvegicus lysophospholipase 1 (Lypla1), mRNA [NM_013006]                                                                                              | <b>9,026</b> |
| Steap2       | Rattus norvegicus six transmembrane epithelial antigen of the prostate 2 (Steap2), mRNA [NM_001107846]                                                        | <b>9,026</b> |
| 0            | Uncharacterized protein [Source:UniProtKB/TrEMBL;Acc:D3ZTC4] [ENSRNOT00000034159]                                                                             | <b>9,025</b> |
| Mesp2        | Rattus norvegicus mesoderm posterior 2 homolog (mouse) (Mesp2), mRNA [NM_001106273]                                                                           | <b>9,024</b> |
| 0            | Rattus norvegicus similar to 40S ribosomal protein S7 (S8) (LOC367108), mRNA [XM_345950]                                                                      | <b>9,024</b> |
| LOC679835    | FM119812 etnohea Rattus norvegicus cDNA clone etnoheaP0047K24 3', mRNA sequence [FM119812]                                                                    | <b>9,023</b> |
| Sdhd         | Rattus norvegicus succinate dehydrogenase complex, subunit D, integral membrane protein (Sdhd), nuclear gene encoding mitochondrial protein, mRNA [NM_198788] | <b>9,022</b> |
| RGD1560883   | PREDICTED: Rattus norvegicus similar to KIAA0825 protein (RGD1560883), mRNA [XM_226616]                                                                       | <b>9,021</b> |
| 0            | Unknown                                                                                                                                                       | <b>9,019</b> |
| 0            | Unknown                                                                                                                                                       | <b>9,018</b> |
| C1qtnf2      | Rattus norvegicus C1q and tumor necrosis factor related protein 2 (C1qtnf2), mRNA [NM_001191918]                                                              | <b>9,018</b> |
| Abcb10       | Rattus norvegicus ATP-binding cassette, subfamily B (MDR/TAP), member 10 (Abcb10), nuclear gene encoding mitochondrial protein, mRNA [NM_001012166]           | <b>9,016</b> |
| Klf6         | Rattus norvegicus Kruppel-like factor 6 (Klf6), mRNA [NM_031642]                                                                                              | <b>9,016</b> |
| 0            | Unknown                                                                                                                                                       | <b>9,015</b> |
| 0            | Rattus norvegicus TL0AAA53YP17 mRNA sequence. [FQ212466]                                                                                                      | <b>9,015</b> |
| Gria3        | Rattus norvegicus glutamate receptor, ionotropic, AMPA 3 (Gria3), transcript variant 2, mRNA [NM_001112742]                                                   | <b>9,015</b> |

|            |                                                                                                                    |       |
|------------|--------------------------------------------------------------------------------------------------------------------|-------|
| RGD1564859 | PREDICTED: Rattus norvegicus RGD1564859 (RGD1564859), mRNA [XM_347061]                                             | 9,015 |
| Rfxank     | Rattus norvegicus regulatory factor X-associated ankyrin-containing protein (Rfxank), mRNA [NM_001013136]          | 9,014 |
| Bcar1      | Rattus norvegicus breast cancer anti-estrogen resistance 1 (Bcar1), mRNA [NM_012931]                               | 9,013 |
| RGD1310794 | Rattus norvegicus similar to RIKEN cDNA C030048B08 (RGD1310794), mRNA [NM_001024246]                               | 9,012 |
| Sin3a      | Rattus norvegicus SIN3 homolog A, transcription regulator (yeast) (Sin3a), mRNA [NM_001108761]                     | 9,012 |
| Vps53      | Rattus norvegicus vacuolar protein sorting 53 homolog (S. cerevisiae) (Vps53), mRNA [NM_001105813]                 | 9,011 |
| RGD1562136 | Rattus norvegicus similar to D1Ert622e protein (RGD1562136), mRNA [NM_001109086]                                   | 9,010 |
| Klh18      | Uncharacterized protein [Source:UniProtKB/TrEMBL;Acc:D4A902] [ENSRNOT00000056141]                                  | 9,009 |
| Pnmal2     | Rattus norvegicus PNMA-like 2 (Pnmal2), mRNA [NM_001107481]                                                        | 9,009 |
| Map4k4     | Rattus norvegicus mitogen-activated protein kinase kinase kinase 4 (Map4k4), mRNA [NM_001106904]                   | 9,007 |
| 0          | Rattus norvegicus similar to glyceraldehyde-3-phosphate dehydrogenase (LOC295420), mRNA [XM_227654]                | 9,006 |
| Hibadh     | Rattus norvegicus 3-hydroxyisobutyrate dehydrogenase (Hibadh), mRNA [NM_022243]                                    | 9,006 |
| Sh3glb1    | Rattus norvegicus SH3-domain GRB2-like endophilin B1 (Sh3glb1), mRNA [NM_001011929]                                | 9,006 |
| 0          | Unknown                                                                                                            | 9,005 |
| Kdm4dl     | PREDICTED: Rattus norvegicus similar to jumonji domain containing 2D (RGD1563367), mRNA [XM_576355]                | 9,005 |
| 0          | Unknown                                                                                                            | 9,005 |
| 0          | Unknown                                                                                                            | 9,004 |
| Ythdf2     | Rattus norvegicus YTH domain family, member 2 (Ythdf2), mRNA [NM_001047099]                                        | 9,001 |
| 0          | Unknown                                                                                                            | 9,001 |
| 0          | Unknown                                                                                                            | 9,000 |
| Gtrgeo22   | Rattus norvegicus gene trap ROSA b-geo 22 (Gtrgeo22), mRNA [NM_001109621]                                          | 8,998 |
| 0          | Unknown                                                                                                            | 8,998 |
| Lrfn4      | Rattus norvegicus leucine rich repeat and fibronectin type III domain containing 4 (Lrfn4), mRNA [NM_001109508]    | 8,998 |
| Uhmk1      | Rattus norvegicus U2AF homology motif (UHM) kinase 1 (Uhmk1), mRNA [NM_017293]                                     | 8,995 |
| Esf1       | Rattus norvegicus ESF1, nucleolar pre-rRNA processing protein, homolog (S. cerevisiae) (Esf1), mRNA [NM_001100771] | 8,994 |
| Pik3ca     | Rattus norvegicus phosphoinositide-3-kinase, catalytic, alpha polypeptide (Pik3ca), mRNA [NM_133399]               | 8,992 |
| Pepd       | Rattus norvegicus peptidase D (Pepd), mRNA [NM_001009641]                                                          | 8,991 |
| Alg14      | Rattus norvegicus asparagine-linked glycosylation 14 homolog (S. cerevisiae) (Alg14), mRNA [NM_001014176]          | 8,987 |
| Pou3f3     | Rattus norvegicus POU class 3 homeobox 3 (Pou3f3), mRNA [NM_138837]                                                | 8,985 |
| Ccl12      | Rattus norvegicus chemokine (C-C motif) ligand 12 (Ccl12), mRNA [NM_001105822]                                     | 8,985 |
| Bean1      | Uncharacterized protein [Source:UniProtKB/TrEMBL;Acc:D3ZFF6] [ENSRNOT00000017774]                                  | 8,982 |
| Ccnj       | Rattus norvegicus cyclin J (Ccnj), mRNA [NM_001106369]                                                             | 8,981 |
| Optn       | Rattus norvegicus optineurin (Optn), mRNA [NM_145081]                                                              | 8,980 |
| Surf2      | Rattus norvegicus surfeit 2 (Surf2), mRNA [NM_001033866]                                                           | 8,980 |

|            |                                                                                                                                                                                |              |
|------------|--------------------------------------------------------------------------------------------------------------------------------------------------------------------------------|--------------|
| 0          | Rattus norvegicus TL0ADA36YM24 mRNA sequence. [FQ221400]                                                                                                                       | <b>8,979</b> |
| Chac2      | Rattus norvegicus ChaC, cation transport regulator homolog 2 (E. coli) (Chac2), mRNA [NM_001025016]                                                                            | <b>8,979</b> |
| Tmem68     | Rattus norvegicus transmembrane protein 68 (Tmem68), mRNA [NM_001107903]                                                                                                       | <b>8,977</b> |
| RGD1565158 | PREDICTED: Rattus norvegicus similar to RIKEN cDNA 4921537P18 (RGD1565158), mRNA [XM_001077736]                                                                                | <b>8,974</b> |
| LOC685030  | PREDICTED: Rattus norvegicus similar to paired immunoglobulin-like type 2 receptor beta (LOC685030), mRNA [XM_002724831]                                                       | <b>8,973</b> |
| Oscp1      | Rattus norvegicus organic solute carrier partner 1 (Oscp1), mRNA [NM_001029923]                                                                                                | <b>8,972</b> |
| Pikfyve    | Similar to phosphatidylinositol-3-phosphate/phosphatidylinositol 5-kinase, type III isoform 2Uncharacterized protein [Source:UniProtKB/TrEMBL;Acc:D3ZT14] [ENSRNOT00000020447] | <b>8,972</b> |
| 0          | Unknown                                                                                                                                                                        | <b>8,966</b> |
| Gphn       | Rattus norvegicus gephyrin (Gphn), mRNA [NM_022865]                                                                                                                            | <b>8,965</b> |
| Mex3c      | Rattus norvegicus mex-3 homolog C (C. elegans) (Mex3c), mRNA [NM_001107377]                                                                                                    | <b>8,965</b> |
| Strbp      | Rattus norvegicus spermatid perinuclear RNA binding protein (Strbp), mRNA [NM_053416]                                                                                          | <b>8,964</b> |
| Ebpl       | Rattus norvegicus emopamil binding protein-like (Ebpl), mRNA [NM_001108381]                                                                                                    | <b>8,962</b> |
| 0          | PREDICTED: Rattus norvegicus similar to H3 histone, family 3B (LOC685984), mRNA [XM_001066068]                                                                                 | <b>8,962</b> |
| Polr3b     | Rattus norvegicus polymerase (RNA) III (DNA directed) polypeptide B (Polr3b), mRNA [NM_001191878]                                                                              | <b>8,961</b> |
| 0          | AGENCOURT_109866019 NIH_MGC_420 Rattus norvegicus cDNA clone IMAGE:9032542 5', mRNA sequence [EV763082]                                                                        | <b>8,961</b> |
| Lrriq1     | PREDICTED: Rattus norvegicus leucine-rich repeats and IQ motif containing 1 (Lrriq1), mRNA [XM_001080693]                                                                      | <b>8,961</b> |
| LOC690349  | Rattus norvegicus hypothetical protein LOC690349 (LOC690349), mRNA [NM_001109581]                                                                                              | <b>8,959</b> |
| Pgrmc1     | Rattus norvegicus progesterone receptor membrane component 1 (Pgrmc1), mRNA [NM_021766]                                                                                        | <b>8,957</b> |
| Brms1      | Rattus norvegicus breast cancer metastasis-suppressor 1 (Brms1), mRNA [NM_001009605]                                                                                           | <b>8,956</b> |
| Pgm2       | Rattus norvegicus phosphoglucomutase 2 (Pgm2), mRNA [NM_001106007]                                                                                                             | <b>8,955</b> |
| Tnks2      | Rattus norvegicus tankyrase, TRF1-interacting ankyrin-related ADP-ribose polymerase 2 (Tnks2), mRNA [NM_001107607]                                                             | <b>8,955</b> |
| 0          | Unknown                                                                                                                                                                        | <b>8,954</b> |
| Aktip      | Rattus norvegicus AKT interacting protein (Aktip), mRNA [NM_001011926]                                                                                                         | <b>8,952</b> |
| 0          | Rattus norvegicus similar to glyceraldehyde-3-phosphate dehydrogenase (LOC307263), mRNA [XM_225724]                                                                            | <b>8,952</b> |
| 0          | Uncharacterized protein [Source:UniProtKB/TrEMBL;Acc:D4ACD7] [ENSRNOT00000014120]                                                                                              | <b>8,951</b> |
| Slc9a2     | Rattus norvegicus solute carrier family 9 (sodium/hydrogen exchanger), member 2 (Slc9a2), transcript variant 1, mRNA [NM_001113335]                                            | <b>8,949</b> |
| 0          | Uncharacterized protein [Source:UniProtKB/TrEMBL;Acc:D3Z9J9] [ENSRNOT00000015767]                                                                                              | <b>8,948</b> |
| Calm3      | Rattus norvegicus calmodulin 3 (Calm3), mRNA [NM_012518]                                                                                                                       | <b>8,948</b> |
| Mapk11     | Rattus norvegicus mitogen-activated protein kinase 11 (Mapk11), mRNA [NM_001109532]                                                                                            | <b>8,948</b> |
| Mat2b      | Rattus norvegicus methionine adenosyltransferase II, beta (Mat2b), mRNA [NM_001044282]                                                                                         | <b>8,948</b> |
| Hrk        | Rattus norvegicus harakiri, BCL2 interacting protein (contains only BH3 domain) (Hrk), mRNA [NM_057130]                                                                        | <b>8,947</b> |
| Drg1       | Rattus norvegicus developmentally regulated GTP binding protein 1 (Drg1), mRNA [NM_001009685]                                                                                  | <b>8,947</b> |
| Cab39l     | Rattus norvegicus calcium binding protein 39-like (Cab39l), mRNA [NM_001011917]                                                                                                | <b>8,947</b> |

|            |                                                                                                                                                                         |       |
|------------|-------------------------------------------------------------------------------------------------------------------------------------------------------------------------|-------|
| Aff4       | Rattus norvegicus AF4/FMR2 family, member 4 (Aff4), mRNA [NM_001107001]                                                                                                 | 8,946 |
| Pfdn6      | Rattus norvegicus prefoldin subunit 6 (Pfdn6), mRNA [NM_212506]                                                                                                         | 8,944 |
| Hmgn1      | Rattus norvegicus high-mobility group nucleosome binding domain 1 (Hmgn1), mRNA [NM_001013184]                                                                          | 8,943 |
| 0          | PREDICTED: Rattus norvegicus similar to Discs large homolog 5 (Placenta and prostate DLG) (Discs large protein P-dlg) (LOC691410), mRNA [XM_001078125]                  | 8,943 |
| 0          | Unknown                                                                                                                                                                 | 8,943 |
| Maff       | Rattus norvegicus v-maf musculoaponeurotic fibrosarcoma oncogene homolog F (avian) (Maff), mRNA [NM_001130573]                                                          | 8,941 |
| Ulk2       | Rattus norvegicus Unc-51 like kinase 2 (C. elegans) (Ulk2), mRNA [NM_001191645]                                                                                         | 8,939 |
| RGD1565119 | PREDICTED: Rattus norvegicus similar to Mitochondrial carrier triple repeat 1 (RGD1565119), mRNA [XM_001078261]                                                         | 8,939 |
| Rab39      | Rattus norvegicus RAB39, member RAS oncogene family (Rab39), mRNA [NM_001108148]                                                                                        | 8,939 |
| Vax2       | Rattus norvegicus ventral anterior homeobox 2 (Vax2), mRNA [NM_022637]                                                                                                  | 8,939 |
| Lhfp12     | Rattus norvegicus lipoma HMGIC fusion partner-like 2 (Lhfp12), mRNA [NM_001106402]                                                                                      | 8,938 |
| Gspt2      | Rattus norvegicus G1 to S phase transition 2 (Gspt2), mRNA [NM_001109319]                                                                                               | 8,938 |
| Cdc45l     | Rattus norvegicus CDC45 cell division cycle 45-like (S. cerevisiae) (Cdc45l), mRNA [NM_001105866]                                                                       | 8,938 |
| Mad21l     | Rattus norvegicus MAD2 mitotic arrest deficient-like 1 (yeast) (Mad21l), mRNA [NM_001106594]                                                                            | 8,937 |
| Brdt       | Rattus norvegicus bromodomain, testis-specific (Brdt), mRNA [NM_001012031]                                                                                              | 8,937 |
| Susd2      | Rattus norvegicus sushi domain containing 2 (Susd2), mRNA [NM_001106381]                                                                                                | 8,936 |
| Nipal4     | Rattus norvegicus NIPA-like domain containing 4 (Nipal4), mRNA [NM_001106995]                                                                                           | 8,935 |
| 0          | Unknown                                                                                                                                                                 | 8,934 |
| Hist2h2ab  | Rattus norvegicus histone cluster 2, H2ab (Hist2h2ab), mRNA [NM_001111341]                                                                                              | 8,932 |
| Rspry1     | Rattus norvegicus ring finger and SPRY domain containing 1 (Rspry1), mRNA [NM_001100945]                                                                                | 8,932 |
| Slc22a15   | Rattus norvegicus solute carrier family 22, member 15 (Slc22a15), mRNA [NM_001107707]                                                                                   | 8,931 |
| Racgap1    | Rattus norvegicus Rac GTPase-activating protein 1 (Racgap1), mRNA [NM_001108112]                                                                                        | 8,931 |
| Spg20      | Rattus norvegicus spastic paraplegia 20 (Troyer syndrome) homolog (human) (Spg20), mRNA [NM_001106433]                                                                  | 8,929 |
| 0          | AI060108 UI-R-C1-li-g-08-0-UI.s1 UI-R-C1 Rattus norvegicus cDNA clone UI-R-C1-li-g-08-0-UI 3', mRNA sequence [AI060108]                                                 | 8,927 |
| Dnhd1      | PREDICTED: Rattus norvegicus dynein heavy chain domain 1 (Dnhd1), miscRNA [XR_085725]                                                                                   | 8,927 |
| Zfp637     | Rattus norvegicus zinc finger protein 637 (Zfp637), mRNA [NM_001134908]                                                                                                 | 8,926 |
| Htt        | Rattus norvegicus huntingtin (Htt), mRNA [NM_024357]                                                                                                                    | 8,926 |
| Utf1       | Rattus norvegicus undifferentiated embryonic cell transcription factor 1 (Utf1), mRNA [NM_001131032]                                                                    | 8,925 |
| 0          | PREDICTED: Rattus norvegicus similar to Zgc:56193 (RGD1564447), mRNA [XM_001058987]                                                                                     | 8,924 |
| 0          | Rattus norvegicus similar to Glyceraldehyde 3-phosphate dehydrogenase (GAPDH) (38 kDa BFA-dependent ADP-ribosylation substrate) (BARS-38) (LOC299213), mRNA [XM_234433] | 8,923 |
| 0          | Unknown                                                                                                                                                                 | 8,923 |
| 0          | Unknown                                                                                                                                                                 | 8,921 |



|              |                                                                                                                                                           |       |
|--------------|-----------------------------------------------------------------------------------------------------------------------------------------------------------|-------|
| Wdr20a       | Rattus norvegicus WD repeat domain 20a (Wdr20a), mRNA [NM_001100894]                                                                                      | 8,917 |
| Plunc        | Rattus norvegicus palate, lung, and nasal epithelium associated (Plunc), mRNA [NM_172031]                                                                 | 8,916 |
| 0            | Unknown                                                                                                                                                   | 8,916 |
| 0            | Unknown                                                                                                                                                   | 8,915 |
| Csnk2a2      | Rattus norvegicus casein kinase 2, alpha prime polypeptide (Csnk2a2), mRNA [NM_001107409]                                                                 | 8,915 |
| Pdrg1        | Rattus norvegicus p53 and DNA damage regulated 1 (Pdrg1), mRNA [NM_001014762]                                                                             | 8,912 |
| Nfx1         | Rattus norvegicus nuclear transcription factor, X-box binding 1 (Nfx1), mRNA [NM_001024784]                                                               | 8,912 |
| Mdga2        | Rattus norvegicus MAM domain containing glycosylphosphatidylinositol anchor 2 (Mdga2), mRNA [NM_199269]                                                   | 8,912 |
| 0            | Unknown                                                                                                                                                   | 8,911 |
| RGD1304580   | Rattus norvegicus similar to Hypothetical protein MGC38513 (RGD1304580), mRNA [NM_001009283]                                                              | 8,911 |
| Apoe         | Rattus norvegicus apolipoprotein E (Apoe), mRNA [NM_138828]                                                                                               | 8,911 |
| Ogfod1       | Rattus norvegicus 2-oxoglutarate and iron-dependent oxygenase domain containing 1 (Ogfod1), mRNA [NM_001107411]                                           | 8,910 |
| RGD1564809   | Uncharacterized protein [Source:UniProtKB/TrEMBL;Acc:D3ZC90] [ENSRNOT00000038184]                                                                         | 8,909 |
| Sumo1        | Rattus norvegicus SMT3 suppressor of mif two 3 homolog 1 (S. cerevisiae) (Sumo1), mRNA [NM_001009672]                                                     | 8,908 |
| Ctsk         | Rattus norvegicus cathepsin K (Ctsk), mRNA [NM_031560]                                                                                                    | 8,907 |
| Myh7         | Rattus norvegicus myosin, heavy chain 7, cardiac muscle, beta (Myh7), mRNA [NM_017240]                                                                    | 8,905 |
| Os9          | Rattus norvegicus osteosarcoma amplified 9 (Os9), mRNA [NM_001007265]                                                                                     | 8,904 |
| 0            | Unknown                                                                                                                                                   | 8,902 |
| Mbnl1        | Rattus norvegicus muscleblind-like 1 (Drosophila) (Mbnl1), mRNA [NM_001191566]                                                                            | 8,902 |
| Nit2         | Rattus norvegicus nitrilase family, member 2 (Nit2), mRNA [NM_001034126]                                                                                  | 8,901 |
| Alkbh4       | Rattus norvegicus alkB, alkylation repair homolog 4 (E. coli) (Alkbh4), mRNA [NM_001105920]                                                               | 8,901 |
| 0            | Unknown                                                                                                                                                   | 8,901 |
| Abcf2        | Rattus norvegicus ATP-binding cassette, subfamily F (GCN20), member 2 (Abcf2), nuclear gene encoding mitochondrial protein, mRNA [NM_001109666]           | 8,899 |
| Clic6        | Rattus norvegicus chloride intracellular channel 6 (Clic6), nuclear gene encoding mitochondrial protein, mRNA [NM_176078]                                 | 8,899 |
| Nme3         | Rattus norvegicus non-metastatic cells 3, protein expressed in (Nme3), mRNA [NM_053507]                                                                   | 8,899 |
| 0            | Rattus norvegicus similar to MAP/microtubule affinity-regulating kinase 2 isoform a; ELKL motif kinase 1; ELKL motif kinase (LOC290818), mRNA [XM_224940] | 8,896 |
| RGD1560383   | RCG34143Uncharacterized protein [Source:UniProtKB/TrEMBL;Acc:D4AC62] [ENSRNOT00000014414]                                                                 | 8,896 |
| Cacna1d      | Rattus norvegicus calcium channel, voltage-dependent, L type, alpha 1D subunit (Cacna1d), mRNA [NM_017298]                                                | 8,895 |
| Podxl        | Rattus norvegicus podocalyxin-like (Podxl), mRNA [NM_138848]                                                                                              | 8,893 |
| LOC100364057 | PREDICTED: Rattus norvegicus Btf3l4 protein-like, transcript variant 1 (LOC100364057), mRNA [XM_002726573]                                                | 8,893 |
| LOC688695    | PREDICTED: Rattus norvegicus similar to SON protein (LOC688695), mRNA [XM_001067956]                                                                      | 8,892 |
| Ccdc134      | Rattus norvegicus coiled-coil domain containing 134 (Ccdc134), mRNA [NM_001024355]                                                                        | 8,889 |

|            |                                                                                                                                             |       |
|------------|---------------------------------------------------------------------------------------------------------------------------------------------|-------|
| Thap6      | THAP domain containing 6 [Source:RefSeq peptide;Acc:NP_001100679] [ENSRNOT00000003431]                                                      | 8,888 |
| Pik3c2b    | Rattus norvegicus phosphoinositide-3-kinase, class 2, beta polypeptide (Pik3c2b), mRNA [NM_001105951]                                       | 8,886 |
| 0          | Rattus norvegicus similar to glyceraldehyde-3-phosphate dehydrogenase (LOC289434), mRNA [XM_213991]                                         | 8,885 |
| 0          | Rattus norvegicus similar to RIKEN cDNA 1700001E04 (LOC363321), mRNA [XM_343661]                                                            | 8,885 |
| 0          | PREDICTED: Rattus norvegicus 2-deoxyribose-5-phosphate aldolase homolog (C. elegans) (Dera), miscRNA [XR_085824]                            | 8,884 |
| Btf3       | Rattus norvegicus basic transcription factor 3 (Btf3), mRNA [NM_001008309]                                                                  | 8,884 |
| Fam116b    | Rattus norvegicus family with sequence similarity 116, member B (Fam116b), mRNA [NM_001108749]                                              | 8,883 |
| Chic2      | Rattus norvegicus cysteine-rich hydrophobic domain 2 (Chic2), mRNA [NM_001105736]                                                           | 8,882 |
| 0          | Uncharacterized protein [Source:UniProtKB/TrEMBL;Acc:D3ZJK8] [ENSRNOT00000065214]                                                           | 8,879 |
| Ptgds      | Rattus norvegicus prostaglandin D2 synthase (brain) (Ptgds), mRNA [NM_013015]                                                               | 8,879 |
| Bbs10      | Rattus norvegicus Bardet-Biedl syndrome 10 (Bbs10), mRNA [NM_001109286]                                                                     | 8,879 |
| 0          | Uncharacterized protein [Source:UniProtKB/TrEMBL;Acc:D3ZKR7] [ENSRNOT00000040456]                                                           | 8,879 |
| Lancl1     | Rattus norvegicus LanC lantibiotic synthetase component C-like 1 (bacterial) (Lancl1), mRNA [NM_053723]                                     | 8,879 |
| Gtf2ird1   | Rattus norvegicus GTF2I repeat domain containing 1 (Gtf2ird1), mRNA [NM_001001504]                                                          | 8,877 |
| Mcf2l      | Rattus norvegicus MCF.2 cell line derived transforming sequence-like (Mcf2l), mRNA [NM_053951]                                              | 8,877 |
| Tmprss3    | Rattus norvegicus transmembrane protease, serine 3 (Tmprss3), mRNA [NM_001107619]                                                           | 8,876 |
| 0          | AN1-type zinc finger and ubiquitin domain-containing protein 1 [Source:RefSeq peptide;Acc:NP_775454] [ENSRNOT00000043556]                   | 8,874 |
| LOC680236  | PREDICTED: Rattus norvegicus hypothetical protein LOC680236 (LOC680236), mRNA [XM_001056256]                                                | 8,874 |
| 0          | Uncharacterized protein [Source:UniProtKB/TrEMBL;Acc:D3Z944] [ENSRNOT00000052233]                                                           | 8,873 |
| RGD1311910 | Rattus norvegicus similar to hypothetical p38 protein (RGD1311910), mRNA [NM_001107373]                                                     | 8,872 |
| Minpp1     | Rattus norvegicus multiple inositol polyphosphate histidine phosphatase 1 (Minpp1), mRNA [NM_019263]                                        | 8,872 |
| Dip2a      | Rattus norvegicus DIP2 disco-interacting protein 2 homolog A (Drosophila) (Dip2a), mRNA [NM_001191564]                                      | 8,871 |
| 0          | Rattus norvegicus similar to glyceraldehyde-3-phosphate dehydrogenase (phosphorylating) (EC 1.2.1.12) - mouse (LOC288024), mRNA [XM_221353] | 8,870 |
| Tbce       | Rattus norvegicus tubulin folding cofactor E (Tbce), mRNA [NM_001012161]                                                                    | 8,869 |
| Sh3rf3     | PREDICTED: Rattus norvegicus SH3 multiple domains 4, transcript variant 2 (Sh3md4), mRNA [XM_001054117]                                     | 8,868 |
| Rbm20      | Rattus norvegicus RNA binding motif protein 20 (Rbm20), mRNA [NM_001107611]                                                                 | 8,868 |
| Vcpip1     | Rattus norvegicus valosin containing protein (p97)/p47 complex interacting protein 1 (Vcpip1), mRNA [NM_176857]                             | 8,865 |
| 0          | Rattus sp. membrane protein-73 mRNA, partial cds; mitochondrial gene for mitochondrial product. [S63519]                                    | 8,864 |
| 0          | Rattus norvegicus TL0AAA50YN10 mRNA sequence. [FQ212883]                                                                                    | 8,863 |
| Ebi3       | Rattus norvegicus Epstein-Barr virus induced 3 (Ebi3), mRNA [NM_001109421]                                                                  | 8,862 |
| B4galt7    | Rattus norvegicus xylosylprotein beta1,4-galactosyltransferase, polypeptide 7 (galactosyltransferase I) (B4galt7), mRNA [NM_001031661]      | 8,862 |
| Gtpbp2     | Rattus norvegicus GTP binding protein 2 (Gtpbp2), mRNA [NM_001013225]                                                                       | 8,860 |
| Zfp36l3    | PREDICTED: Rattus norvegicus zinc finger protein 36, C3H type-like 3 (Zfp36l3), mRNA [XM_001053657]                                         | 8,860 |

|              |                                                                                                                                                      |       |
|--------------|------------------------------------------------------------------------------------------------------------------------------------------------------|-------|
| Znf532       | Rattus norvegicus zinc finger protein 532 (Znf532), mRNA [NM_001107382]                                                                              | 8,859 |
| Spetex-2F    | Rattus norvegicus Spetex-2F protein (Spetex-2F), mRNA [NM_001009968]                                                                                 | 8,859 |
| Acr          | Rattus norvegicus acrosin (Acr), mRNA [NM_012490]                                                                                                    | 8,855 |
| Slc5a1       | Rattus norvegicus solute carrier family 5 (sodium/glucose cotransporter), member 1 (Slc5a1), mRNA [NM_013033]                                        | 8,853 |
| Pttg1        | Rattus norvegicus pituitary tumor-transforming 1 (Pttg1), mRNA [NM_022391]                                                                           | 8,852 |
| Slc1a1       | Rattus norvegicus solute carrier family 1 (neuronal/epithelial high affinity glutamate transporter, system Xag), member 1 (Slc1a1), mRNA [NM_013032] | 8,848 |
| 0            | Uncharacterized protein [Source:UniProtKB/TrEMBL;Acc:D3ZKR7] [ENSRNOT00000059076]                                                                    | 8,846 |
| RGD1307799   | Rattus norvegicus similar to RIKEN cDNA 2400003C14 (RGD1307799), mRNA [NM_001017454]                                                                 | 8,845 |
| 0            | Unknown                                                                                                                                              | 8,843 |
| Ddx24        | Rattus norvegicus DEAD (Asp-Glu-Ala-Asp) box polypeptide 24 (Ddx24), mRNA [NM_199119]                                                                | 8,842 |
| LOC100360849 | PREDICTED: Rattus norvegicus hypothetical protein LOC100360849 (LOC100360849), mRNA [XM_002729568]                                                   | 8,841 |
| Fam188a      | Rattus norvegicus family with sequence similarity 188, member A (Fam188a), mRNA [NM_001106122]                                                       | 8,838 |
| Olr311       | Rattus norvegicus olfactory receptor 311 (Olr311), mRNA [NM_001000555]                                                                               | 8,837 |
| 39326        | Rattus norvegicus septin 7 (Sept7), transcript variant 2, mRNA [NM_001113740]                                                                        | 8,836 |
| 0            | Unknown                                                                                                                                              | 8,836 |
| Acer3        | PREDICTED: Rattus norvegicus phytoceramidase, alkaline (Phca), mRNA [XM_001065019]                                                                   | 8,836 |
| RGD1310587   | Rattus norvegicus similar to hypothetical protein FLJ14146 (RGD1310587), mRNA [NM_001100857]                                                         | 8,833 |
| 0            | Rattus norvegicus similar to putative pheromone receptor (LOC302028), mRNA [XM_229568]                                                               | 8,831 |
| 0            | Unknown                                                                                                                                              | 8,831 |
| Atox1        | Rattus norvegicus ATX1 antioxidant protein 1 homolog (yeast) (Atox1), mRNA [NM_053359]                                                               | 8,830 |
| Nupl1        | Rattus norvegicus nucleoporin like 1 (Nupl1), mRNA [NM_139091]                                                                                       | 8,827 |
| Calca        | Rattus norvegicus calcitonin-related polypeptide alpha (Calca), transcript variant 2, mRNA [NM_001033955]                                            | 8,825 |
| 0            | Unknown                                                                                                                                              | 8,823 |
| Pctk2        | Rattus norvegicus PCTAIRE protein kinase 2 (Pctk2), mRNA [NM_001108082]                                                                              | 8,821 |
| RGD1561102   | Rattus norvegicus similar to ribosomal protein S12 (RGD1561102), mRNA [NM_001106777]                                                                 | 8,821 |
| Cited1       | Rattus norvegicus Cbp/p300-interacting transactivator with Glu/Asp-rich carboxy-terminal domain 1 (Cited1), mRNA [NM_172055]                         | 8,820 |
| Uchl1        | Rattus norvegicus ubiquitin carboxyl-terminal esterase L1 (ubiquitin thiolesterase) (Uchl1), mRNA [NM_017237]                                        | 8,818 |
| 0            | Unknown                                                                                                                                              | 8,818 |
| RGD1565806   | Uncharacterized protein [Source:UniProtKB/TrEMBL;Acc:D4A9L3] [ENSRNOT00000035742]                                                                    | 8,817 |
| Ins1         | Rattus norvegicus insulin 1 (Ins1), mRNA [NM_019129]                                                                                                 | 8,816 |
| Gucy2d       | Rattus norvegicus guanylate cyclase 2d (Gucy2d), mRNA [NM_130737]                                                                                    | 8,815 |
| Olr1253      | Rattus norvegicus olfactory receptor 1253 (Olr1253), mRNA [NM_001000805]                                                                             | 8,815 |
| Il3ra        | Rattus norvegicus interleukin 3 receptor, alpha (Il3ra), mRNA [NM_139260]                                                                            | 8,813 |

|            |                                                                                                                                        |       |
|------------|----------------------------------------------------------------------------------------------------------------------------------------|-------|
| 0          | PREDICTED: Rattus norvegicus similar to monoacylglycerol O-acyltransferase 2 (LOC685560), mRNA [XM_001064308]                          | 8,813 |
| Cyth3      | Rattus norvegicus cytohesin 3 (Cyth3), mRNA [NM_053912]                                                                                | 8,810 |
| Traf3      | Rattus norvegicus Tnf receptor-associated factor 3 (Traf3), mRNA [NM_001108724]                                                        | 8,810 |
| Iqub       | Rattus norvegicus IQ motif and ubiquitin domain containing (Iqub), mRNA [NM_001034130]                                                 | 8,809 |
| Cyr61      | Rattus norvegicus cysteine-rich, angiogenic inducer, 61 (Cyr61), mRNA [NM_031327]                                                      | 8,809 |
| Zrsr2      | Uncharacterized protein [Source:UniProtKB/TrEMBL;Acc:D3ZHQ8] [ENSRNOT00000045300]                                                      | 8,808 |
| 0          | Unknown                                                                                                                                | 8,807 |
| Tpd5211    | Rattus norvegicus tumor protein D52-like 1 (Tpd5211), mRNA [NM_001044295]                                                              | 8,804 |
| Slc25a46   | Rattus norvegicus solute carrier family 25, member 46 (Slc25a46), mRNA [NM_001100515]                                                  | 8,802 |
| Leptol1    | Rattus norvegicus leptin receptor overlapping transcript-like 1 (Leptol1), mRNA [NM_001013188]                                         | 8,802 |
| Lgals8     | Rattus norvegicus lectin, galactoside-binding, soluble, 8 (Lgals8), mRNA [NM_053862]                                                   | 8,801 |
| 0          | LRRGT00181 [Source:UniProtKB/TrEMBL;Acc:Q6QI27] [ENSRNOT00000041132]                                                                   | 8,800 |
| LOC681820  | PREDICTED: Rattus norvegicus hypothetical protein LOC681820 (LOC681820), mRNA [XM_001058575]                                           | 8,800 |
| LOC691153  | Rattus norvegicus hypothetical protein LOC691153 (LOC691153), mRNA [NM_001109627]                                                      | 8,800 |
| Fam134b    | Rattus norvegicus family with sequence similarity 134, member B (Fam134b), mRNA [NM_001034912]                                         | 8,799 |
| Zfp161     | Rattus norvegicus zinc finger protein 161 (Zfp161), mRNA [NM_172325]                                                                   | 8,799 |
| Kcna5      | Rattus norvegicus potassium voltage-gated channel, shaker-related subfamily, member 5 (Kcna5), mRNA [NM_012972]                        | 8,799 |
| 0          | Unknown                                                                                                                                | 8,798 |
| Rab11fip2  | Rattus norvegicus RAB11 family interacting protein 2 (class I) (Rab11fip2), mRNA [NM_001107447]                                        | 8,798 |
| Npm3       | Uncharacterized protein [Source:UniProtKB/TrEMBL;Acc:D3ZYK9] [ENSRNOT00000023963]                                                      | 8,797 |
| 0          | immunoglobulin joining chain Gene [Source:MGI Symbol;Acc:MGI:96493] [ENSRNOT00000004866]                                               | 8,797 |
| Hsd17b8    | Rattus norvegicus hydroxysteroid (17-beta) dehydrogenase 8 (Hsd17b8), mRNA [NM_212529]                                                 | 8,796 |
| Atmin      | Rattus norvegicus ATM interactor (Atmin), mRNA [NM_001191786]                                                                          | 8,796 |
| Casp6      | Rattus norvegicus caspase 6 (Casp6), mRNA [NM_031775]                                                                                  | 8,795 |
| Cacna2d1   | Rattus norvegicus calcium channel, voltage-dependent, alpha2/delta subunit 1 (Cacna2d1), transcript variant 2, mRNA [NM_001110848]     | 8,794 |
| LOC684270  | PREDICTED: Rattus norvegicus similar to isochorismatase domain containing 2, transcript variant 2 (LOC684270), mRNA [XM_001059344]     | 8,794 |
| 0          | Unknown                                                                                                                                | 8,793 |
| LOC683720  | PREDICTED: Rattus norvegicus similar to keratin 6L (LOC683720), mRNA [XM_002726981]                                                    | 8,788 |
| Ripk1      | Rattus norvegicus receptor (TNFRSF)-interacting serine-threonine kinase 1 (Ripk1), mRNA [NM_001107350]                                 | 8,788 |
| 0          | Unknown                                                                                                                                | 8,787 |
| Alg9       | Rattus norvegicus asparagine-linked glycosylation 9, alpha-1,2-mannosyltransferase homolog (S. cerevisiae) (Alg9), mRNA [NM_001109000] | 8,786 |
| Rpl10l     | Uncharacterized protein [Source:UniProtKB/TrEMBL;Acc:D4A1P2] [ENSRNOT00000047597]                                                      | 8,784 |
| RGD1566010 | PREDICTED: Rattus norvegicus RGD1566010 (RGD1566010), mRNA [XM_001067260]                                                              | 8,784 |
| 0          | Unknown                                                                                                                                | 8,783 |

|            |                                                                                                                                        |       |
|------------|----------------------------------------------------------------------------------------------------------------------------------------|-------|
| Fam96b     | Rattus norvegicus family with sequence similarity 96, member B (Fam96b), mRNA [NM_001144854]                                           | 8,782 |
| Plcb1      | Rattus norvegicus phospholipase C, beta 1 (phosphoinositide-specific) (Plcb1), mRNA [NM_001077641]                                     | 8,781 |
| 0          | Unknown                                                                                                                                | 8,780 |
| Tox        | Rattus norvegicus thymocyte selection-associated high mobility group box (Tox), mRNA [NM_001108654]                                    | 8,779 |
| RGD1305508 | PREDICTED: Rattus norvegicus similar to hypothetical protein MGC23280 (RGD1305508), miscRNA [XR_009409]                                | 8,778 |
| 0          | PREDICTED: Rattus norvegicus similar to keratinocytes proline-rich protein, transcript variant 1 (LOC686143), mRNA [XM_001066677]      | 8,777 |
| Dhrsx      | Rattus norvegicus dehydrogenase/reductase (SDR family) X-linked (Dhrsx), mRNA [NM_001105914]                                           | 8,777 |
| Raly       | Rattus norvegicus RNA binding protein, autoantigenic (hnRNP-associated with lethal yellow homolog (mouse)) (Raly), mRNA [NM_001011958] | 8,777 |
| 0          | Unknown                                                                                                                                | 8,775 |
| Gmfb       | Rattus norvegicus glia maturation factor, beta (Gmfb), mRNA [NM_031032]                                                                | 8,775 |
| Nr1d2      | Rattus norvegicus nuclear receptor subfamily 1, group D, member 2 (Nr1d2), mRNA [NM_147210]                                            | 8,775 |
| Zfp191     | Rattus norvegicus zinc finger protein 191 (Zfp191), mRNA [NM_182955]                                                                   | 8,773 |
| 0          | Unknown                                                                                                                                | 8,772 |
| Pgm1       | Rattus norvegicus phosphoglucomutase 1 (Pgm1), mRNA [NM_017033]                                                                        | 8,772 |
| 0          | Rattus norvegicus similar to putative protein kinase (LOC308211), mRNA [XM_218001]                                                     | 8,771 |
| Ptcra      | Pre T-cell antigen receptor alpha [Source:UniProtKB/Swiss-Prot;Acc:P0C6B3] [ENSRNOT00000067894]                                        | 8,771 |
| Qsox2      | Rattus norvegicus quiescin Q6 sulfhydryl oxidase 2 (Qsox2), mRNA [NM_001109434]                                                        | 8,771 |
| Vcan       | Rattus norvegicus versican (Vcan), transcript variant 2, mRNA [NM_053663]                                                              | 8,770 |
| Tnfrsf12a  | Rattus norvegicus tumor necrosis factor receptor superfamily, member 12a (Tnfrsf12a), mRNA [NM_181086]                                 | 8,768 |
| RGD1562310 | Rattus norvegicus similar to hypothetical protein FLJ21415 (RGD1562310), mRNA [NM_001109066]                                           | 8,767 |
| Zbtb33     | Rattus norvegicus zinc finger and BTB domain containing 33 (Zbtb33), mRNA [NM_001109314]                                               | 8,765 |
| Anapc11    | Rattus norvegicus anaphase promoting complex subunit 11 (Anapc11), mRNA [NM_001126082]                                                 | 8,764 |
| 0          | Uncharacterized protein [Source:UniProtKB/TrEMBL;Acc:D3ZKR7] [ENSRNOT00000050021]                                                      | 8,764 |
| Mcf2       | Rattus norvegicus multiple coagulation factor deficiency 2 (Mcf2), mRNA [NM_139253]                                                    | 8,763 |
| Pipox      | Rattus norvegicus pipecolic acid oxidase (Pipox), mRNA [NM_001012009]                                                                  | 8,761 |
| Tgm2       | Rattus norvegicus transglutaminase 2, C polypeptide (Tgm2), mRNA [NM_019386]                                                           | 8,760 |
| 0          | Rattus norvegicus similar to glyceraldehyde-3-phosphate dehydrogenase (LOC311121), mRNA [XM_230014]                                    | 8,760 |
| Akt3       | Rattus norvegicus v-akt murine thymoma viral oncogene homolog 3 (protein kinase B, gamma) (Akt3), mRNA [NM_031575]                     | 8,758 |
| Tbc1d22b   | Rattus norvegicus TBC1 domain family, member 22B (Tbc1d22b), mRNA [NM_001025059]                                                       | 8,757 |
| Asb6       | Rattus norvegicus ankyrin repeat and SOCS box-containing 6 (Asb6), mRNA [NM_001011963]                                                 | 8,757 |
| RGD1561890 | PREDICTED: Rattus norvegicus similar to craniofacial development protein 1 (RGD1561890), mRNA [XM_233989]                              | 8,754 |
| Crtap      | Rattus norvegicus cartilage associated protein (Crtap), mRNA [NM_001108785]                                                            | 8,754 |
| Calcb      | Rattus norvegicus calcitonin-related polypeptide, beta (Calcb), mRNA [NM_138513]                                                       | 8,752 |

|           |                                                                                                                                                        |       |
|-----------|--------------------------------------------------------------------------------------------------------------------------------------------------------|-------|
| LOC301193 | PREDICTED: Rattus norvegicus similar to Discs large homolog 5 (Placenta and prostate DLG) (Discs large protein P-dlg) (LOC301193), mRNA [XM_002727321] | 8,750 |
| Pik3r1    | Rattus norvegicus phosphoinositide-3-kinase, regulatory subunit 1 (alpha) (Pik3r1), mRNA [NM_013005]                                                   | 8,749 |
| Hs3st6    | Rattus norvegicus heparan sulfate (glucosamine) 3-O-sulfotransferase 6 (Hs3st6), mRNA [NM_001109450]                                                   | 8,747 |
| Orc3l     | Rattus norvegicus origin recognition complex, subunit 3-like (yeast) (Orc3l), mRNA [NM_001025282]                                                      | 8,747 |
| Peo1      | Rattus norvegicus progressive external ophthalmoplegia 1 (Peo1), mRNA [NM_001107599]                                                                   | 8,747 |
| Cdc40     | Rattus norvegicus cell division cycle 40 homolog (S. cerevisiae) (Cdc40), mRNA [NM_001108538]                                                          | 8,746 |
| Krtap3-1  | Uncharacterized protein [Source:UniProtKB/TrEMBL;Acc:D3ZZR8] [ENSRNOT00000016752]                                                                      | 8,746 |
| Dbi       | Rattus norvegicus LRRGT00046 mRNA, complete cds. [AY383701]                                                                                            | 8,744 |
| Aqp4      | Rattus norvegicus aquaporin 4 (Aqp4), transcript variant 2, mRNA [NM_001142366]                                                                        | 8,744 |
| 0         | Unknown                                                                                                                                                | 8,743 |
| Neur11B   | Rattus norvegicus neuralized homolog 1B (Drosophila) (Neur11B), mRNA [NM_001142652]                                                                    | 8,743 |
| Lmbr1     | Rattus norvegicus limb region 1 homolog (mouse) (Lmbr1), mRNA [NM_001191858]                                                                           | 8,742 |
| Tmbim1    | Rattus norvegicus transmembrane BAX inhibitor motif containing 1 (Tmbim1), mRNA [NM_001007713]                                                         | 8,741 |
| Arhgap4   | Rattus norvegicus Rho GTPase activating protein 4 (Arhgap4), mRNA [NM_144740]                                                                          | 8,741 |
| Spint2    | Rattus norvegicus serine peptidase inhibitor, Kunitz type, 2 (Spint2), transcript variant 1, mRNA [NM_001082549]                                       | 8,741 |
| Plekhf1   | Rattus norvegicus pleckstrin homology domain containing, family F (with FYVE domain) member 1 (Plekhf1), mRNA [NM_001013148]                           | 8,740 |
| 0         | Unknown                                                                                                                                                | 8,740 |
| Hist2h3c2 | Rattus norvegicus histone cluster 2, H3c2 (Hist2h3c2), mRNA [NM_001107698]                                                                             | 8,740 |
| Gm672     | Rattus norvegicus gene model 672, (NCBI) (Gm672), mRNA [NM_001108891]                                                                                  | 8,737 |
| 0         | Unknown                                                                                                                                                | 8,737 |
| 0         | Q2DQC2_9DELTA (Q2DQC2) HipA protein, DNA binding regulator, partial (5%) [TC592031]                                                                    | 8,737 |
| Pla2g1b   | Rattus norvegicus phospholipase A2, group IB, pancreas (Pla2g1b), mRNA [NM_031585]                                                                     | 8,736 |
| Rab5a     | Rattus norvegicus RAB5A, member RAS oncogene family (Rab5a), mRNA [NM_022692]                                                                          | 8,735 |
| Pds5b     | Rattus norvegicus PDS5, regulator of cohesion maintenance, homolog B (S. cerevisiae) (Pds5b), transcript variant 1, mRNA [NM_001102383]                | 8,735 |
| Calml3    | Rattus norvegicus calmodulin-like 3 (Calml3), mRNA [NM_001012054]                                                                                      | 8,735 |
| Unc13b    | Rattus norvegicus unc-13 homolog B (C. elegans) (Unc13b), transcript variant 2, mRNA [NM_001042579]                                                    | 8,734 |
| Zcchc7    | Rattus norvegicus zinc finger, CCHC domain containing 7 (Zcchc7), mRNA [NM_001106658]                                                                  | 8,734 |
| 0         | Nuclear receptor coactivator 3 [Source:UniProtKB/Swiss-Prot;Acc:Q9EPU2] [ENSRNOT00000044234]                                                           | 8,730 |
| Coch      | cochlin [Source:RefSeq peptide;Acc:NP_001102180] [ENSRNOT00000007365]                                                                                  | 8,728 |
| 0         | Unknown                                                                                                                                                | 8,728 |
| Tshz1     | BC017636 Sdccag33 protein {Mus musculus} (exp=-1; wgp=0; cg=0), partial (27%) [TC593766]                                                               | 8,728 |
| Krt14     | Rattus norvegicus keratin 14 (Krt14), mRNA [NM_001008751]                                                                                              | 8,728 |
| 0         | Uncharacterized protein [Source:UniProtKB/TrEMBL;Acc:D3ZXM8] [ENSRNOT00000059741]                                                                      | 8,727 |

|           |                                                                                                                                                         |       |
|-----------|---------------------------------------------------------------------------------------------------------------------------------------------------------|-------|
| Cst3      | Rattus norvegicus cystatin C (Cst3), mRNA [NM_012837]                                                                                                   | 8,727 |
| Il1rapl1  | Rattus norvegicus interleukin 1 receptor accessory protein-like 1 (Il1rapl1), mRNA [NM_177935]                                                          | 8,726 |
| Lyn       | Rattus norvegicus v-yes-1 Yamaguchi sarcoma viral related oncogene homolog (Lyn), transcript variant 1, mRNA [NM_030857]                                | 8,726 |
| LOC497848 | PREDICTED: Rattus norvegicus hypothetical LOC497848 (LOC497848), miscRNA [XR_006411]                                                                    | 8,725 |
| 0         | Cytoplasmic polyadenylation element binding protein 2 (Predicted)Uncharacterized protein [Source:UniProtKB/TrEMBL;Acc:D3ZHK8] [ENSRNOT00000006727]      | 8,725 |
| Gulo      | Rattus norvegicus gulonolactone (L-) oxidase (Gulo), mRNA [NM_022220]                                                                                   | 8,724 |
| 0         | Unknown                                                                                                                                                 | 8,724 |
| Nsfl1c    | Rattus norvegicus NSFL1 (p97) cofactor (p47) (Nsfl1c), mRNA [NM_031981]                                                                                 | 8,723 |
| Acly      | Rattus norvegicus ATP citrate lyase (Acly), transcript variant 1, mRNA [NM_016987]                                                                      | 8,723 |
| Znf394    | Rattus norvegicus zinc finger protein 394 (Znf394), mRNA [NM_145724]                                                                                    | 8,721 |
| Adi1      | Rattus norvegicus acireductone dioxygenase 1 (Adi1), mRNA [NM_199097]                                                                                   | 8,721 |
| Ctbp1     | Rattus norvegicus C-terminal binding protein 1 (Ctbp1), mRNA [NM_019201]                                                                                | 8,720 |
| Aof1      | Rattus norvegicus amine oxidase (flavin containing) domain 1 (Aof1), mRNA [NM_001107343]                                                                | 8,719 |
| Fzd9      | Rattus norvegicus frizzled homolog 9 (Drosophila) (Fzd9), mRNA [NM_153305]                                                                              | 8,718 |
| Myc       | Rattus norvegicus myelocytomatosis oncogene (Myc), mRNA [NM_012603]                                                                                     | 8,717 |
| Stk11ip   | Rattus norvegicus serine/threonine kinase 11 interacting protein (Stk11ip), mRNA [NM_001106922]                                                         | 8,716 |
| Der1      | Rattus norvegicus Der1-like domain family, member 1 (Der1), mRNA [NM_001014202]                                                                         | 8,713 |
| Dusp14    | Rattus norvegicus dual specificity phosphatase 14 (Dusp14), mRNA [NM_001079893]                                                                         | 8,713 |
| Echdc3    | Rattus norvegicus enoyl Coenzyme A hydratase domain containing 3 (Echdc3), nuclear gene encoding mitochondrial protein, mRNA [NM_001101010]             | 8,712 |
| LOC688562 | PREDICTED: Rattus norvegicus similar to U1 small nuclear ribonucleoprotein C (U1 snRNP protein C) (U1C protein) (U1-C) (LOC688562), mRNA [XM_001067425] | 8,711 |
| Slc1a5    | Rattus norvegicus solute carrier family 1 (neutral amino acid transporter), member 5 (Slc1a5), mRNA [NM_175758]                                         | 8,711 |
| Tmem44    | Uncharacterized protein [Source:UniProtKB/TrEMBL;Acc:D4ADT4] [ENSRNOT00000002353]                                                                       | 8,711 |
| 0         | Unknown                                                                                                                                                 | 8,709 |
| Nmnat3    | Rattus norvegicus nicotinamide nucleotide adenylyltransferase 3 (Nmnat3), nuclear gene encoding mitochondrial protein, mRNA [NM_001013224]              | 8,709 |
| Prtn3     | Rattus norvegicus proteinase 3 (Prtn3), mRNA [NM_001024264]                                                                                             | 8,706 |
| Mamdc4    | Rattus norvegicus MAM domain containing 4 (Mamdc4), mRNA [NM_145768]                                                                                    | 8,706 |
| Gap43     | Rattus norvegicus growth associated protein 43 (Gap43), mRNA [NM_017195]                                                                                | 8,705 |
| LOC296884 | Rattus norvegicus cDNA clone IMAGE:7132615. [BC083591]                                                                                                  | 8,703 |
| Zfp426l   | Rattus norvegicus zinc finger protein 426-like (Zfp426l), mRNA [NM_001135018]                                                                           | 8,703 |
| 0         | Unknown                                                                                                                                                 | 8,702 |
| 0         | Rattus norvegicus similar to 60S ribosomal protein L10 (QM protein homolog) (LOC301174), mRNA [XM_236837]                                               | 8,701 |

|            |                                                                                                                                  |       |
|------------|----------------------------------------------------------------------------------------------------------------------------------|-------|
| Grid1      | Rattus norvegicus glutamate receptor, ionotropic, delta 1 (Grid1), mRNA [NM_024378]                                              | 8,701 |
| LOC499843  | Rattus norvegicus LRRGT00091 (LOC499843), mRNA [NM_001047953]                                                                    | 8,701 |
| Impact     | Rattus norvegicus imprinted and ancient (Impact), mRNA [NM_001012235]                                                            | 8,700 |
| Sae1       | Rattus norvegicus SUMO1 activating enzyme subunit 1 (Sae1), mRNA [NM_001012063]                                                  | 8,700 |
| Gnpda2     | Rattus norvegicus glucosamine-6-phosphate deaminase 2 (Gnpda2), mRNA [NM_001106005]                                              | 8,700 |
| LOC500118  | Rattus norvegicus similar to RIKEN cDNA D330028D13 (LOC500118), mRNA [NM_001025771]                                              | 8,700 |
| 0          | Unknown                                                                                                                          | 8,696 |
| RGD1559985 | PREDICTED: Rattus norvegicus similar to chromosome 10 open reading frame 92 (RGD1559985), mRNA [XM_574582]                       | 8,695 |
| 0          | Unknown                                                                                                                          | 8,694 |
| 0          | Uncharacterized protein [Source:UniProtKB/TrEMBL;Acc:D4A283] [ENSRNOT00000007407]                                                | 8,693 |
| Pdcl       | Rattus norvegicus phosducin-like (Pdcl), mRNA [NM_022247]                                                                        | 8,690 |
| Tspan12    | Rattus norvegicus tetraspanin 12 (Tspan12), mRNA [NM_001015026]                                                                  | 8,688 |
| Elmod2     | Rattus norvegicus ELMO/CED-12 domain containing 2 (Elmod2), mRNA [NM_001109506]                                                  | 8,686 |
| Adh1       | Rattus norvegicus alcohol dehydrogenase 1 (class I) (Adh1), mRNA [NM_019286]                                                     | 8,684 |
| Zkscan3    | Rattus norvegicus zinc finger with KRAB and SCAN domains 3 (Zkscan3), mRNA [NM_001012053]                                        | 8,683 |
| RGD1309374 | Uncharacterized protein [Source:UniProtKB/TrEMBL;Acc:D3ZU62] [ENSRNOT00000020492]                                                | 8,683 |
| Rasa2      | Rattus norvegicus RAS p21 protein activator 2 (Rasa2), mRNA [NM_001105724]                                                       | 8,682 |
| Polb       | Rattus norvegicus polymerase (DNA directed), beta (Polb), mRNA [NM_017141]                                                       | 8,681 |
| 0          | Unknown                                                                                                                          | 8,678 |
| Clu        | Rattus norvegicus clusterin (Clu), mRNA [NM_053021]                                                                              | 8,678 |
| Tmem170b   | Rattus norvegicus transmembrane protein 170B (Tmem170b), mRNA [NM_001008774]                                                     | 8,677 |
| Trappc3    | Rattus norvegicus trafficking protein particle complex 3 (Trappc3), mRNA [NM_001008376]                                          | 8,677 |
| Ypel3      | Rattus norvegicus yippee-like 3 (Drosophila) (Ypel3), mRNA [NM_001135698]                                                        | 8,677 |
| Glipr2     | PREDICTED: Rattus norvegicus GLI pathogenesis-related 2 (Glipr2), mRNA [XM_001054584]                                            | 8,677 |
| Usp20      | Rattus norvegicus ubiquitin specific peptidase 20 (Usp20), mRNA [NM_001107827]                                                   | 8,674 |
| RGD1311080 | PREDICTED: Rattus norvegicus similar to RIKEN cDNA A930038C07 (RGD1311080), miscRNA [XR_008378]                                  | 8,673 |
| Immt       | Rattus norvegicus inner membrane protein, mitochondrial (Immt), nuclear gene encoding mitochondrial protein, mRNA [NM_001034928] | 8,673 |
| RGD1305793 | Rattus norvegicus similar to hypothetical protein FLJ20154 (RGD1305793), mRNA [NM_001127484]                                     | 8,672 |
| Ddr2       | Rattus norvegicus discoidin domain receptor tyrosine kinase 2 (Ddr2), mRNA [NM_031764]                                           | 8,672 |
| Camk4      | Rattus norvegicus calcium/calmodulin-dependent protein kinase IV (Camk4), mRNA [NM_012727]                                       | 8,670 |
| 0          | Unknown                                                                                                                          | 8,668 |
| Zfp853     | PREDICTED: Rattus norvegicus zinc finger protein 853 (Zfp853), mRNA [XM_002724787]                                               | 8,666 |
| Cdc3711    | Rattus norvegicus cell division cycle 37 homolog (S. cerevisiae)-like 1 (Cdc3711), mRNA [NM_001011941]                           | 8,666 |
| 0          | Unknown                                                                                                                          | 8,663 |



|            |                                                                                                                                                                                                                      |              |
|------------|----------------------------------------------------------------------------------------------------------------------------------------------------------------------------------------------------------------------|--------------|
| Lce1m      | Rattus norvegicus late cornified envelope 1M (Lce1m), mRNA [NM_001109500]                                                                                                                                            | <b>8,663</b> |
| LOC363746  | PREDICTED: Rattus norvegicus similar to 40S ribosomal protein S7 (S8) (LOC363746), miscRNA [XR_006358]                                                                                                               | <b>8,663</b> |
| 0          | Unknown                                                                                                                                                                                                              | <b>8,661</b> |
| Ttc13      | Rattus norvegicus tetratricopeptide repeat domain 13 (Ttc13), mRNA [NM_001136162]                                                                                                                                    | <b>8,656</b> |
| Srpk1      | Rattus norvegicus SFRS protein kinase 1 (Srpk1), mRNA [NM_001025726]                                                                                                                                                 | <b>8,656</b> |
| Adpgk      | Rattus norvegicus ADP-dependent glucokinase (Adpgk), mRNA [NM_001100723]                                                                                                                                             | <b>8,655</b> |
| 0          | Unknown                                                                                                                                                                                                              | <b>8,655</b> |
| LOC680262  | PREDICTED: Rattus norvegicus hypothetical protein LOC680262, transcript variant 1 (LOC680262), mRNA [XM_001056376]                                                                                                   | <b>8,653</b> |
| LOC691543  | Rattus norvegicus hypothetical protein LOC691543 (LOC691543), mRNA [NM_001109645]                                                                                                                                    | <b>8,653</b> |
| 0          | AA996428 UI-R-C0-he-g-09-0-UI.s1 UI-R-C0 Rattus norvegicus cDNA clone UI-R-C0-he-g-09-0-UI 3', mRNA sequence [AA996428]                                                                                              | <b>8,650</b> |
| LOC683402  | Rattus norvegicus similar to AP-3 complex subunit sigma-2 (Adapter-related protein complex 3 sigma-2 subunit) (Sigma-adaptin 3b) (AP-3 complex sigma-3B subunit) (Sigma-3B-adaptin) (LOC683402), mRNA [NM_001115039] | <b>8,649</b> |
| Nlk        | Rattus norvegicus nemo like kinase (Nlk), mRNA [NM_001191924]                                                                                                                                                        | <b>8,649</b> |
| Spata18    | Rattus norvegicus spermatogenesis associated 18 (Spata18), mRNA [NM_199374]                                                                                                                                          | <b>8,648</b> |
| Cr1l       | Rattus norvegicus complement component (3b/4b) receptor 1-like (Cr1l), transcript variant 3, mRNA [NM_001005265]                                                                                                     | <b>8,647</b> |
| 0          | Unknown                                                                                                                                                                                                              | <b>8,646</b> |
| Fam155b    | Uncharacterized protein [Source:UniProtKB/TrEMBL;Acc:D4A4E6] [ENSRNOT00000057920]                                                                                                                                    | <b>8,646</b> |
| Lman1      | Rattus norvegicus lectin, mannose-binding, 1 (Lman1), mRNA [NM_053886]                                                                                                                                               | <b>8,645</b> |
| 0          | Unknown                                                                                                                                                                                                              | <b>8,644</b> |
| 0          | Unknown                                                                                                                                                                                                              | <b>8,643</b> |
| Tarsl2     | Rattus norvegicus threonyl-tRNA synthetase-like 2 (Tarsl2), mRNA [NM_001014020]                                                                                                                                      | <b>8,643</b> |
| 0          | Unknown                                                                                                                                                                                                              | <b>8,643</b> |
| Ldb1       | Rattus norvegicus LIM domain binding 1 (Ldb1), mRNA [NM_001107601]                                                                                                                                                   | <b>8,643</b> |
| 0          | Unknown                                                                                                                                                                                                              | <b>8,642</b> |
| Tmed9      | Rattus norvegicus transmembrane emp24 protein transport domain containing 9 (Tmed9), mRNA [NM_001009703]                                                                                                             | <b>8,641</b> |
| Rnf152     | Rattus norvegicus ring finger protein 152 (Rnf152), mRNA [NM_001106305]                                                                                                                                              | <b>8,641</b> |
| Kif5a      | Rattus norvegicus kinesin family member 5A (Kif5a), mRNA [NM_212523]                                                                                                                                                 | <b>8,640</b> |
| Trappc2    | Rattus norvegicus trafficking protein particle complex 2 (Trappc2), mRNA [NM_001024965]                                                                                                                              | <b>8,639</b> |
| RGD1559679 | PREDICTED: Rattus norvegicus similar to Interferon alpha-1 precursor (RGD1559679), mRNA [XM_578466]                                                                                                                  | <b>8,638</b> |
| 0          | Unknown                                                                                                                                                                                                              | <b>8,638</b> |
| Prrg4      | Rattus norvegicus proline rich Gla (G-carboxyglutamic acid) 4 (transmembrane) (Prrg4), mRNA [NM_001109203]                                                                                                           | <b>8,636</b> |
| Zfp709     | Rattus norvegicus zinc finger protein 709 (Zfp709), mRNA [NM_153731]                                                                                                                                                 | <b>8,635</b> |
| Bend5      | Rattus norvegicus BEN domain containing 5 (Bend5), mRNA [NM_001108672]                                                                                                                                               | <b>8,635</b> |
| Brca2      | Rattus norvegicus breast cancer 2 (Brca2), mRNA [NM_031542]                                                                                                                                                          | <b>8,635</b> |

|            |                                                                                                                                                       |       |
|------------|-------------------------------------------------------------------------------------------------------------------------------------------------------|-------|
| Arl4c      | PREDICTED: Rattus norvegicus ADP-ribosylation factor-like 4C (Arl4c), miscRNA [XR_086347]                                                             | 8,634 |
| Btg3       | Rattus norvegicus BTG family, member 3 (Btg3), mRNA [NM_019290]                                                                                       | 8,633 |
| Ccdc56     | Rattus norvegicus coiled-coil domain containing 56 (Ccdc56), mRNA [NM_001109047]                                                                      | 8,631 |
| 0          | Unknown                                                                                                                                               | 8,631 |
| Letm2      | Rattus norvegicus leucine zipper-EF-hand containing transmembrane protein 2 (Letm2), nuclear gene encoding mitochondrial protein, mRNA [NM_001012158] | 8,631 |
| St3gal2    | Rattus norvegicus ST3 beta-galactoside alpha-2,3-sialyltransferase 2 (St3gal2), mRNA [NM_031695]                                                      | 8,630 |
| Psmb11     | Rattus norvegicus proteasome (prosome, macropain) subunit, beta type, 11 (Psmb11), mRNA [NM_001106032]                                                | 8,629 |
| Zdhhc15    | Rattus norvegicus zinc finger, DHHC-type containing 15 (Zdhhc15), mRNA [NM_001039101]                                                                 | 8,629 |
| 0          | Unknown                                                                                                                                               | 8,629 |
| Akap2      | Rattus norvegicus A kinase (PRKA) anchor protein 2 (Akap2), mRNA [NM_001011974]                                                                       | 8,629 |
| Zbtb10     | Rattus norvegicus zinc finger and BTB domain containing 10 (Zbtb10), mRNA [NM_024489]                                                                 | 8,629 |
| 0          | Uncharacterized protein [Source:UniProtKB/TrEMBL;Acc:D4A391] [ENSRNOT00000066991]                                                                     | 8,628 |
| Ftsjd1     | Rattus norvegicus FtsJ methyltransferase domain containing 1 (Ftsjd1), mRNA [NM_001106186]                                                            | 8,627 |
| Duox1      | Rattus norvegicus dual oxidase 1 (Duox1), mRNA [NM_153739]                                                                                            | 8,627 |
| Wdr60      | Rattus norvegicus WD repeat domain 60 (Wdr60), mRNA [NM_001191773]                                                                                    | 8,627 |
| 0          | Unknown                                                                                                                                               | 8,626 |
| Cdh29      | Uncharacterized protein [Source:UniProtKB/TrEMBL;Acc:D4AAX3] [ENSRNOT00000046259]                                                                     | 8,626 |
| Blvrb      | Rattus norvegicus biliverdin reductase B (flavin reductase (NADPH)) (Blvrb), mRNA [NM_001106236]                                                      | 8,626 |
| Siah2      | Rattus norvegicus seven in absentia 2 (Siah2), mRNA [NM_134457]                                                                                       | 8,625 |
| 0          | Unknown                                                                                                                                               | 8,625 |
| RT1-S3     | Rattus norvegicus RT1 class Ib, locus S3 (RT1-S3), mRNA [NM_001008886]                                                                                | 8,625 |
| Prr5l      | Rattus norvegicus proline rich 5 like (Prr5l), mRNA [NM_001080150]                                                                                    | 8,625 |
| Ormdl3     | Rattus norvegicus ORM1-like 3 ( <i>S. cerevisiae</i> ) (Ormdl3), mRNA [NM_001047897]                                                                  | 8,624 |
| RGD1561582 | Uncharacterized protein [Source:UniProtKB/TrEMBL;Acc:D3ZHH6] [ENSRNOT00000006999]                                                                     | 8,623 |
| Pcdhgb8    | Rattus norvegicus protocadherin gamma subfamily B, 8 (Pcdhgb8), mRNA [NM_001037159]                                                                   | 8,623 |
| Rwdd4      | Rattus norvegicus RWD domain containing 4A (Rwdd4), mRNA [NM_001034994]                                                                               | 8,622 |
| Tmem2      | Rattus norvegicus transmembrane protein 2 (Tmem2), mRNA [NM_001107596]                                                                                | 8,618 |
| 0          | Unknown                                                                                                                                               | 8,615 |
| Cdyl       | Rattus norvegicus chromodomain protein, Y-like (Cdyl), mRNA [NM_001014145]                                                                            | 8,614 |
| Man1c1     | Rattus norvegicus mannosidase, alpha, class 1C, member 1 (Man1c1), mRNA [NM_001108687]                                                                | 8,613 |
| Spry4      | Rattus norvegicus sprouty homolog 4 ( <i>Drosophila</i> ) (Spry4), mRNA [NM_001106150]                                                                | 8,613 |
| Arhgap5    | Rattus norvegicus Rho GTPase activating protein 5 (Arhgap5), mRNA [NM_001047869]                                                                      | 8,611 |
| Sardh      | Rattus norvegicus sarcosine dehydrogenase (Sardh), nuclear gene encoding mitochondrial protein, mRNA [NM_053664]                                      | 8,610 |

|            |                                                                                                                                             |              |
|------------|---------------------------------------------------------------------------------------------------------------------------------------------|--------------|
| 0          | FM095807 etnofat Rattus norvegicus cDNA clone etnofatP0038D05 5', mRNA sequence [FM095807]                                                  | <b>8,610</b> |
| Itsn1      | Rattus norvegicus intersectin 1 (SH3 domain protein) (Itsn1), transcript variant 2, mRNA [NM_019227]                                        | <b>8,610</b> |
| RT1-T24-2  | Rattus norvegicus RT1 class I, locus T24, gene 2 (RT1-T24-2), non-coding RNA [NR_002151]                                                    | <b>8,609</b> |
| Recql5     | Rattus norvegicus RecQ protein-like 5 (Recql5), mRNA [NM_001105853]                                                                         | <b>8,609</b> |
| 0          | Unknown                                                                                                                                     | <b>8,608</b> |
| Rhbdd3     | Rattus norvegicus rhomboid domain containing 3 (Rhbdd3), mRNA [NM_001013875]                                                                | <b>8,607</b> |
| Ndufs7     | Rattus norvegicus NADH dehydrogenase (ubiquinone) Fe-S protein 7 (Ndufs7), nuclear gene encoding mitochondrial protein, mRNA [NM_001008525] | <b>8,607</b> |
| Fkbp3      | Rattus norvegicus FK506 binding protein 3 (Fkbp3), mRNA [NM_001106736]                                                                      | <b>8,607</b> |
| Agps       | Rattus norvegicus alkylglycerone phosphate synthase (Agps), mRNA [NM_053350]                                                                | <b>8,607</b> |
| Lipogenin  | Rattus norvegicus Lipogenin (Lipogenin), mRNA [NM_145790]                                                                                   | <b>8,606</b> |
| Gorasp2    | Rattus norvegicus golgi reassembly stacking protein 2 (Gorasp2), mRNA [NM_001007720]                                                        | <b>8,603</b> |
| 0          | Unknown                                                                                                                                     | <b>8,600</b> |
| Tssk4      | Rattus norvegicus testis-specific serine kinase 4 (Tssk4), mRNA [NM_001110487]                                                              | <b>8,600</b> |
| 0          | Unknown                                                                                                                                     | <b>8,600</b> |
| Fam115a    | Similar to mKIAA0738 protein (Predicted), isoform CRA_aUncharacterized protein [Source:UniProtKB/TrEMBL;Acc:D3Z8A4] [ENSRNOT00000024428]    | <b>8,600</b> |
| 0          | Uncharacterized protein [Source:UniProtKB/TrEMBL;Acc:D3ZE74] [ENSRNOT00000050658]                                                           | <b>8,600</b> |
| Foxq1      | Rattus norvegicus forkhead box Q1 (Foxq1), mRNA [NM_022858]                                                                                 | <b>8,598</b> |
| Wdr1       | Rattus norvegicus WD repeat domain 1 (Wdr1), mRNA [NM_001014135]                                                                            | <b>8,598</b> |
| Gpc3       | Rattus norvegicus glypican 3 (Gpc3), mRNA [NM_012774]                                                                                       | <b>8,598</b> |
| Hiatl1     | Rattus norvegicus hippocampus abundant transcript-like 1 (Hiatl1), mRNA [NM_001107334]                                                      | <b>8,597</b> |
| 0          | Suppressor of G2 allele of SKP1 homolog [Source:UniProtKB/Swiss-Prot;Acc:B0BN85] [ENSRNOT00000042606]                                       | <b>8,597</b> |
| 0          | Uncharacterized protein [Source:UniProtKB/TrEMBL;Acc:D3ZKR7] [ENSRNOT00000059076]                                                           | <b>8,596</b> |
| Slc6a6     | Rattus norvegicus solute carrier family 6 (neurotransmitter transporter, taurine), member 6 (Slc6a6), mRNA [NM_017206]                      | <b>8,596</b> |
| 0          | Kinesin-like protein kif1a [Source:UniProtKB/TrEMBL;Acc:Q2P9S1] [ENSRNOT00000050557]                                                        | <b>8,595</b> |
| Cyb561     | Rattus norvegicus cytochrome b-561 (Cyb561), mRNA [NM_001107056]                                                                            | <b>8,595</b> |
| Ly96       | Rattus norvegicus lymphocyte antigen 96 (Ly96), mRNA [NM_001024279]                                                                         | <b>8,594</b> |
| RGD1310348 | Rattus norvegicus similar to Ser/Thr-rich protein T10 in DGCR region (RGD1310348), mRNA [NM_001108323]                                      | <b>8,593</b> |
| 0          | Rattus norvegicus similar to putative homeobox protein (LOC294473), mRNA [XM_228242]                                                        | <b>8,593</b> |
| 0          | Unknown                                                                                                                                     | <b>8,593</b> |
| Rasa4      | PREDICTED: Rattus norvegicus similar to Rasa4 protein, transcript variant 1 (RGD1565457), mRNA [XM_002724808]                               | <b>8,592</b> |
| LOC680716  | PREDICTED: Rattus norvegicus hypothetical protein LOC680716 (LOC680716), mRNA [XM_001058554]                                                | <b>8,592</b> |
| Ahnak      | Rattus norvegicus AHNAK nucleoprotein (Ahnak), mRNA [NM_001191951]                                                                          | <b>8,591</b> |

|              |                                                                                                                                                                                             |              |
|--------------|---------------------------------------------------------------------------------------------------------------------------------------------------------------------------------------------|--------------|
| Nln          | Rattus norvegicus neurolysin (metallopeptidase M3 family) (Nln), nuclear gene encoding mitochondrial protein, mRNA [NM_053970]                                                              | <b>8,591</b> |
| Ly86         | Rattus norvegicus lymphocyte antigen 86 (Ly86), mRNA [NM_001106128]                                                                                                                         | <b>8,591</b> |
| Mlxipl       | Rattus norvegicus MLX interacting protein-like (Mlxipl), mRNA [NM_133552]                                                                                                                   | <b>8,591</b> |
| Fam55c       | Rattus norvegicus family with sequence similarity 55, member C (Fam55c), mRNA [NM_001109435]                                                                                                | <b>8,590</b> |
| Ndufa10l1    | Rattus norvegicus NADH dehydrogenase (ubiquinone) 1 alpha subcomplex 10-like 1 (Ndufa10l1), mRNA [NM_182671]                                                                                | <b>8,589</b> |
| Aqp5         | Rattus norvegicus aquaporin 5 (Aqp5), mRNA [NM_012779]                                                                                                                                      | <b>8,587</b> |
| Pcdh17       | Rattus norvegicus protocadherin 17 (Pcdh17), mRNA [NM_001107279]                                                                                                                            | <b>8,587</b> |
| 0            | Rattus norvegicus similar to RIKEN cDNA 4933431D05 (LOC364949), mRNA [XM_344727]                                                                                                            | <b>8,585</b> |
| Prkd3        | Rattus norvegicus protein kinase D3 (Prkd3), mRNA [NM_001024263]                                                                                                                            | <b>8,584</b> |
| Nlrp1a       | Rattus norvegicus NLR family, pyrin domain containing 1A (Nlrp1a), mRNA [NM_001145755]                                                                                                      | <b>8,584</b> |
| N-pac        | Rattus norvegicus cytokine-like nuclear factor n-pac (N-pac), mRNA [NM_001007800]                                                                                                           | <b>8,583</b> |
| Kpna1        | Rattus norvegicus karyopherin alpha 1 (Kpna1), mRNA [NM_198726]                                                                                                                             | <b>8,583</b> |
| 0            | Unknown                                                                                                                                                                                     | <b>8,583</b> |
| Nrp2         | Rattus norvegicus neuropilin 2 (Nrp2), mRNA [NM_030869]                                                                                                                                     | <b>8,582</b> |
| Cst11        | Rattus norvegicus cystatin 11 (Cst11), mRNA [NM_139085]                                                                                                                                     | <b>8,582</b> |
| Map3k7ip1    | Rattus norvegicus mitogen-activated protein kinase kinase kinase 7 interacting protein 1 (Map3k7ip1), mRNA [NM_001109976]                                                                   | <b>8,582</b> |
| Sfrs11       | Rattus norvegicus splicing factor, arginine/serine-rich 11 (Sfrs11), mRNA [NM_001035255]                                                                                                    | <b>8,582</b> |
| Ucp2         | Rattus norvegicus uncoupling protein 2 (mitochondrial, proton carrier) (Ucp2), nuclear gene encoding mitochondrial protein, mRNA [NM_019354]                                                | <b>8,582</b> |
| LOC100361404 | PREDICTED: Rattus norvegicus hypothetical protein LOC100361404 (LOC100361404), mRNA [XM_002729057]                                                                                          | <b>8,581</b> |
| 0            | Unknown                                                                                                                                                                                     | <b>8,579</b> |
| 0            | Q3TS78_MOUSE (Q3TS78) In vitro fertilized eggs cDNA, RIKEN full-length enriched library, clone:7420459N23 product:transportin 1, full insert sequence. (Fragment), partial (11%) [TC640129] | <b>8,578</b> |
| RGD1559578   | Rattus norvegicus RGD1559578 (RGD1559578), mRNA [NM_001134497]                                                                                                                              | <b>8,578</b> |
| Pgam5        | Rattus norvegicus phosphoglycerate mutase family member 5 (Pgam5), nuclear gene encoding mitochondrial protein, mRNA [NM_001025272]                                                         | <b>8,578</b> |
| LOC680555    | PREDICTED: Rattus norvegicus similar to EMI domain containing 1 (LOC680555), partial mRNA [XM_001057708]                                                                                    | <b>8,577</b> |
| 0            | Unknown                                                                                                                                                                                     | <b>8,576</b> |
| Dnajb6       | Rattus norvegicus DnaJ (Hsp40) homolog, subfamily B, member 6 (Dnajb6), mRNA [NM_001013209]                                                                                                 | <b>8,575</b> |
| Rabac1       | Rattus norvegicus Rab acceptor 1 (prenylated) (Rabac1), mRNA [NM_031774]                                                                                                                    | <b>8,574</b> |
| Mkrm2        | Rattus norvegicus makorin, ring finger protein, 2 (Mkrm2), mRNA [NM_001008314]                                                                                                              | <b>8,574</b> |
| 0            | Ig epsilon chain C region [Source:UniProtKB/Swiss-Prot;Acc:P01855] [ENSRNOT00000006912]                                                                                                     | <b>8,573</b> |
| Hist1h1b     | Rattus norvegicus histone cluster 1, H1b (Hist1h1b), mRNA [NM_001109417]                                                                                                                    | <b>8,571</b> |
| Ccdc58       | Rattus norvegicus coiled-coil domain containing 58 (Ccdc58), mRNA [NM_001105875]                                                                                                            | <b>8,570</b> |
| RGD1307235   | Rattus norvegicus similar to RIKEN cDNA 2310035C23 (RGD1307235), mRNA [NM_001134546]                                                                                                        | <b>8,569</b> |
| Dstn         | Rattus norvegicus destrin (Dstn), mRNA [NM_001033666]                                                                                                                                       | <b>8,569</b> |

|            |                                                                                                                                                                                                      |              |
|------------|------------------------------------------------------------------------------------------------------------------------------------------------------------------------------------------------------|--------------|
| Glycam1    | Rattus norvegicus glycosylation dependent cell adhesion molecule 1 (Glycam1), mRNA [NM_012794]                                                                                                       | <b>8,567</b> |
| 0          | PREDICTED: Rattus norvegicus SRY-box containing gene 9 (LOC100361122), mRNA [XM_002727836]                                                                                                           | <b>8,564</b> |
| LOC501282  | PREDICTED: Rattus norvegicus similar to lymphocyte antigen 6 complex, locus E ligand (LOC501282), mRNA [XM_576697]                                                                                   | <b>8,564</b> |
| Sstr3      | Rattus norvegicus somatostatin receptor 3 (Sstr3), mRNA [NM_133522]                                                                                                                                  | <b>8,562</b> |
| Ttc3       | Rattus norvegicus tetratricopeptide repeat domain 3 (Ttc3), mRNA [NM_001108315]                                                                                                                      | <b>8,561</b> |
| Dmtf1      | Rattus norvegicus cyclin D binding myb-like transcription factor 1 (Dmtf1), mRNA [NM_053693]                                                                                                         | <b>8,560</b> |
| 0          | Unknown                                                                                                                                                                                              | <b>8,560</b> |
| Bmp2k      | Uncharacterized protein [Source:UniProtKB/TrEMBL;Acc:D4A0Z6] [ENSRNOT00000060868]                                                                                                                    | <b>8,559</b> |
| Snrpb      | Rattus norvegicus small nuclear ribonucleoprotein polypeptides B and B1 (Snrpb), mRNA [NM_134358]                                                                                                    | <b>8,559</b> |
| Unc84b     | Uncharacterized protein [Source:UniProtKB/TrEMBL;Acc:D3ZJ67] [ENSRNOT00000046399]                                                                                                                    | <b>8,559</b> |
| Ppp1r15b   | Rattus norvegicus protein phosphatase 1, regulatory (inhibitor) subunit 15b (Ppp1r15b), mRNA [NM_001107175]                                                                                          | <b>8,558</b> |
| RGD1311066 | RGD1311066 protein Similar to RIKEN cDNA 0610011L14 gene [Source:UniProtKB/TrEMBL;Acc:B1WC03] [ENSRNOT00000027369]                                                                                   | <b>8,558</b> |
| Rpl24      | Rattus norvegicus ribosomal protein L24 (Rpl24), mRNA [NM_022515]                                                                                                                                    | <b>8,556</b> |
| RGD1561530 | PREDICTED: Rattus norvegicus similar to Tle6 protein (RGD1561530), miscRNA [XR_009018]                                                                                                               | <b>8,555</b> |
| 0          | Similar to intracellular membrane-associated calcium-independent phospholipase A2 gamma (Predicted), isoform CRA_b Uncharacterized protein [Source:UniProtKB/TrEMBL;Acc:D3ZRC4] [ENSRNOT00000047296] | <b>8,555</b> |
| MGC94199   | Rattus norvegicus similar to RIKEN cDNA 2610301B20; EST A1428449 (MGC94199), mRNA [NM_001007746]                                                                                                     | <b>8,555</b> |
| Il8ra      | Rattus norvegicus interleukin 8 receptor, alpha (Il8ra), mRNA [NM_019310]                                                                                                                            | <b>8,554</b> |
| Ribc1      | Rattus norvegicus RIB43A domain with coiled-coils 1 (Ribc1), mRNA [NM_001007715]                                                                                                                     | <b>8,551</b> |
| Mmd        | Rattus norvegicus monocyte to macrophage differentiation-associated (Mmd), mRNA [NM_001007673]                                                                                                       | <b>8,551</b> |
| Fst        | Rattus norvegicus follistatin (Fst), mRNA [NM_012561]                                                                                                                                                | <b>8,551</b> |
| Pla2g2c    | Rattus norvegicus phospholipase A2, group IIC (Pla2g2c), mRNA [NM_019202]                                                                                                                            | <b>8,550</b> |
| Sgtb       | Rattus norvegicus small glutamine-rich tetratricopeptide repeat (TPR)-containing, beta (Sgtb), mRNA [NM_181629]                                                                                      | <b>8,549</b> |
| Cyp2c11    | Rattus norvegicus cytochrome P450, subfamily 2, polypeptide 11 (Cyp2c11), mRNA [NM_019184]                                                                                                           | <b>8,548</b> |
| Ndn        | Rattus norvegicus necdin homolog (mouse) (Ndn), mRNA [NM_001008558]                                                                                                                                  | <b>8,548</b> |
| Wdr13      | Rattus norvegicus WD repeat domain 13 (Wdr13), mRNA [NM_001108247]                                                                                                                                   | <b>8,548</b> |
| Lrrc38     | Rattus norvegicus leucine rich repeat containing 38 (Lrrc38), mRNA [NM_001107991]                                                                                                                    | <b>8,547</b> |
| Mybphl     | Rattus norvegicus myosin binding protein H-like (Mybphl), mRNA [NM_001014042]                                                                                                                        | <b>8,547</b> |
| Lppr4      | Rattus norvegicus lipid phosphate phosphatase-related protein type 4 (Lppr4), mRNA [NM_001001508]                                                                                                    | <b>8,546</b> |
| Fam21c     | Rattus norvegicus family with sequence similarity 21, member C (Fam21c), mRNA [NM_199207]                                                                                                            | <b>8,545</b> |
| Mettl9     | Rattus norvegicus methyltransferase like 9 (Mettl9), mRNA [NM_001163164]                                                                                                                             | <b>8,544</b> |
| Tmie       | Rattus norvegicus transmembrane inner ear (Tmie), mRNA [NM_001109299]                                                                                                                                | <b>8,541</b> |
| Nat9       | Rattus norvegicus N-acetyltransferase 9 (GCN5-related, putative) (Nat9), mRNA [NM_001134835]                                                                                                         | <b>8,541</b> |
| Ccdc115    | coiled-coil domain-containing protein 115 [Source:RefSeq peptide;Acc:NP_001102263] [ENSRNOT00000017722]                                                                                              | <b>8,541</b> |

|           |                                                                                                                  |       |
|-----------|------------------------------------------------------------------------------------------------------------------|-------|
| Xpo5      | Rattus norvegicus exportin 5 (Xpo5), mRNA [NM_001108789]                                                         | 8,540 |
| Cntnap4   | Rattus norvegicus contactin associated protein-like 4 (Cntnap4), mRNA [NM_001107432]                             | 8,540 |
| LOC690333 | Rattus norvegicus hypothetical protein LOC690333 (LOC690333), mRNA [NM_001109580]                                | 8,538 |
| Irf9      | Rattus norvegicus interferon regulatory factor 9 (Irf9), mRNA [NM_001012041]                                     | 8,538 |
| Maml1     | Rattus norvegicus mastermind like 1 (Drosophila) (Maml1), mRNA [NM_001106997]                                    | 8,538 |
| LOC500700 | PREDICTED: Rattus norvegicus similar to chromosome 14 open reading frame 145 (LOC500700), miscRNA [XR_085864]    | 8,537 |
| 0         | Uncharacterized protein [Source:UniProtKB/TrEMBL;Acc:D3ZL00] [ENSRNOT00000056427]                                | 8,536 |
| Hdgfrp3   | Rattus norvegicus hepatoma-derived growth factor, related protein 3 (Hdgfrp3), mRNA [NM_145785]                  | 8,536 |
| Gapdh     | Rattus norvegicus glyceraldehyde-3-phosphate dehydrogenase (Gapdh), mRNA [NM_017008]                             | 8,536 |
| Syne1     | Rattus norvegicus candidate plasticity protein 2b (cPG2B) mRNA, complete cds. [AY597251]                         | 8,535 |
| Chd1      | Rattus norvegicus chromodomain helicase DNA binding protein 1 (Chd1), mRNA [NM_001107465]                        | 8,534 |
| Ckap5     | Ckap5 protein [Source:UniProtKB/TrEMBL;Acc:Q32Q01] [ENSRNOT00000021837]                                          | 8,533 |
| Vom2r12   | Rattus norvegicus vomeronasal 2 receptor, 12 (Vom2r12), mRNA [NM_001099488]                                      | 8,532 |
| Jmjd1c    | Rattus norvegicus jumonji domain containing 1C (Jmjd1c), mRNA [NM_001191719]                                     | 8,530 |
| Clcn3     | Rattus norvegicus chloride channel 3 (Clcn3), mRNA [NM_053363]                                                   | 8,529 |
| Cant1     | Rattus norvegicus calcium activated nucleotidase 1 (Cant1), mRNA [NM_144754]                                     | 8,529 |
| Ankrd34c  | Rattus norvegicus ankyrin repeat domain 34C (Ankrd34c), mRNA [NM_001106845]                                      | 8,528 |
| Tmco1     | Rattus norvegicus transmembrane and coiled-coil domains 1 (Tmco1), mRNA [NM_001009631]                           | 8,526 |
| MGC112883 | Rattus norvegicus LOC500651 (MGC112883), mRNA [NM_001047743]                                                     | 8,526 |
| Cyp2w1    | PREDICTED: Rattus norvegicus cytochrome P450, family 2, subfamily W, polypeptide 1 (Cyp2w1), mRNA [XM_001074391] | 8,525 |
| 0         | Unknown                                                                                                          | 8,525 |
| 0         | Unknown                                                                                                          | 8,523 |
| Eaf1      | Rattus norvegicus ELL associated factor 1 (Eaf1), mRNA [NM_001107293]                                            | 8,522 |
| LOC687056 | Rattus norvegicus hypothetical protein LOC687056 (LOC687056), mRNA [NM_001134996]                                | 8,522 |
| 0         | Unknown                                                                                                          | 8,518 |
| Vangl1    | Rattus norvegicus vang-like 1 (van gogh, Drosophila) (Vangl1), mRNA [NM_001109584]                               | 8,518 |
| Fxyd3     | Rattus norvegicus FXYD domain-containing ion transport regulator 3 (Fxyd3), mRNA [NM_172317]                     | 8,518 |
| Csmd1     | Rattus norvegicus CUB and Sushi multiple domains 1 (Csmd1), mRNA [NM_001037327]                                  | 8,518 |
| Olr1201   | Rattus norvegicus olfactory receptor 1201 (Olr1201), mRNA [NM_001000818]                                         | 8,517 |
| Jph3      | Rattus norvegicus junctophilin 3 (Jph3), mRNA [NM_001107437]                                                     | 8,517 |
| Trappc6a  | Rattus norvegicus trafficking protein particle complex 6A (Trappc6a), mRNA [NM_001109410]                        | 8,517 |
| 0         | Unknown                                                                                                          | 8,513 |
| Aldh1l1   | Rattus norvegicus aldehyde dehydrogenase 1 family, member L1 (Aldh1l1), mRNA [NM_022547]                         | 8,512 |
| Sost      | Rattus norvegicus sclerosteosis (Sost), mRNA [NM_030584]                                                         | 8,511 |

|           |                                                                                                                                               |       |
|-----------|-----------------------------------------------------------------------------------------------------------------------------------------------|-------|
| Acadsb    | Rattus norvegicus acyl-Coenzyme A dehydrogenase, short/branched chain (Acadsb), nuclear gene encoding mitochondrial protein, mRNA [NM_013084] | 8,511 |
| Igfbp2    | Rattus norvegicus insulin-like growth factor binding protein 2 (Igfbp2), mRNA [NM_013122]                                                     | 8,510 |
| Whamm     | Rattus norvegicus WAS protein homolog associated with actin, golgi membranes and microtubules (Whamm), mRNA [NM_001130728]                    | 8,510 |
| 0         | PREDICTED: Rattus norvegicus mCG114897-like (LOC100363987), miscRNA [XR_085743]                                                               | 8,508 |
| LOC685513 | Uncharacterized protein [Source:UniProtKB/TrEMBL;Acc:D3ZVY9] [ENSRNOT00000036953]                                                             | 8,507 |
| Prpsap2   | Rattus norvegicus phosphoribosyl pyrophosphate synthetase-associated protein 2 (Prpsap2), mRNA [NM_057131]                                    | 8,506 |
| LOC691692 | PREDICTED: Rattus norvegicus hypothetical protein LOC691692 (LOC691692), mRNA [XM_001079285]                                                  | 8,505 |
| Snrpn     | Rattus norvegicus small nuclear ribonucleoprotein polypeptide N (Snrpn), mRNA [NM_031117]                                                     | 8,501 |
| Pdcd6ip   | Rattus norvegicus programmed cell death 6 interacting protein (Pdcd6ip), mRNA [NM_001029910]                                                  | 8,500 |
| Tll1      | Rattus norvegicus tolloid-like 1 (Tll1), mRNA [NM_001106081]                                                                                  | 8,499 |
| Fgd4      | Rattus norvegicus FYVE, RhoGEF and PH domain containing 4 (Fgd4), mRNA [NM_139263]                                                            | 8,499 |
| Rsph1     | Rattus norvegicus radial spoke head 1 homolog (Chlamydomonas) (Rsph1), mRNA [NM_001012176]                                                    | 8,497 |
| 0         | PREDICTED: Rattus norvegicus CG13585-like (LOC100359425), mRNA [XM_002728168]                                                                 | 8,497 |
| 0         | Uncharacterized protein [Source:UniProtKB/TrEMBL;Acc:D4A2S8] [ENSRNOT00000034757]                                                             | 8,496 |
| Snx29     | Rattus norvegicus sorting nexin 29 (Snx29), mRNA [NM_001109526]                                                                               | 8,495 |
| Magix     | Rattus norvegicus MAGI family member, X-linked (Magix), mRNA [NM_001014109]                                                                   | 8,495 |
| 0         | Unknown                                                                                                                                       | 8,494 |
| Qprt      | Rattus norvegicus quinolinate phosphoribosyltransferase (Qprt), mRNA [NM_001009646]                                                           | 8,492 |
| 0         | Unknown                                                                                                                                       | 8,492 |
| Ccdc65    | Rattus norvegicus coiled-coil domain containing 65 (Ccdc65), mRNA [NM_001014203]                                                              | 8,490 |
| Cltb      | Rattus norvegicus clathrin, light chain (Lcb) (Cltb), mRNA [NM_053835]                                                                        | 8,487 |
| Fam161a   | Rattus norvegicus family with sequence similarity 161, member A (Fam161a), mRNA [NM_001013876]                                                | 8,487 |
| Plcg1     | Rattus norvegicus phospholipase C, gamma 1 (Plcg1), mRNA [NM_013187]                                                                          | 8,486 |
| Loxl1     | Rattus norvegicus lysyl oxidase-like 1 (Loxl1), mRNA [NM_001012125]                                                                           | 8,485 |
| LOC680207 | PREDICTED: Rattus norvegicus hypothetical protein LOC680207 (LOC680207), mRNA [XM_001056119]                                                  | 8,484 |
| Zdhhc14   | Rattus norvegicus zinc finger, DHHC-type containing 14 (Zdhhc14), mRNA [NM_001039343]                                                         | 8,484 |
| 0         | Uncharacterized protein [Source:UniProtKB/TrEMBL;Acc:D3ZCX4] [ENSRNOT00000008851]                                                             | 8,484 |
| Mfsd9     | Rattus norvegicus major facilitator superfamily domain containing 9 (Mfsd9), mRNA [NM_001108215]                                              | 8,482 |
| Traf3ip2  | Rattus norvegicus Traf3 interacting protein 2 (Traf3ip2), mRNA [NM_001044248]                                                                 | 8,481 |
| Tpmt      | Rattus norvegicus thiopurine S-methyltransferase (Tpmt), mRNA [NM_001079531]                                                                  | 8,481 |
| 0         | PREDICTED: Rattus norvegicus dynein, axonemal, heavy polypeptide 9, transcript variant 2 (Dnah9), mRNA [XM_002724507]                         | 8,480 |
| Zfp189    | Rattus norvegicus zinc finger protein 189 (Zfp189), mRNA [NM_001107930]                                                                       | 8,478 |
| Dnm2      | Rattus norvegicus dynamin 2 (Dnm2), mRNA [NM_013199]                                                                                          | 8,477 |

|              |                                                                                                                                     |              |
|--------------|-------------------------------------------------------------------------------------------------------------------------------------|--------------|
| Ap1ar        | Rattus norvegicus adaptor-related protein complex 1 associated regulatory protein (Ap1ar), mRNA [NM_001191850]                      | <b>8,477</b> |
| Unc13a       | Rattus norvegicus unc-13 homolog A (C. elegans) (Unc13a), mRNA [NM_022861]                                                          | <b>8,476</b> |
| Ahsa2        | Rattus norvegicus AHA1, activator of heat shock protein ATPase homolog 2 (yeast) (Ahsa2), mRNA [NM_001107241]                       | <b>8,475</b> |
| Wnt1         | Rattus norvegicus wingless-type MMTV integration site family, member 1 (Wnt1), mRNA [NM_001105714]                                  | <b>8,474</b> |
| Asb2         | Rattus norvegicus ankyrin repeat and SOCS box-containing 2 (Asb2), mRNA [NM_001011984]                                              | <b>8,474</b> |
| Fhod1        | Rattus norvegicus formin homology 2 domain containing 1 (Fhod1), mRNA [NM_001191600]                                                | <b>8,474</b> |
| Znf518a      | Rattus norvegicus zinc finger protein 518A (Znf518a), mRNA [NM_001030038]                                                           | <b>8,472</b> |
| Ilk          | Rattus norvegicus integrin-linked kinase (Ilk), mRNA [NM_133409]                                                                    | <b>8,470</b> |
| LOC100174910 | Rattus norvegicus glutaredoxin-like protein (LOC100174910), mRNA [NM_001131003]                                                     | <b>8,470</b> |
| Ccdc50       | Rattus norvegicus coiled-coil domain containing 50 (Ccdc50), mRNA [NM_182736]                                                       | <b>8,469</b> |
| Atl2         | Rattus norvegicus atlastin GTPase 2 (Atl2), mRNA [NM_001100671]                                                                     | <b>8,468</b> |
| Plxna3       | Rattus norvegicus plexin A3 (Plxna3), mRNA [NM_001107581]                                                                           | <b>8,468</b> |
| 0            | Rattus norvegicus similar to mammary tumor virus receptor 2 isoform 2 (LOC361441), mRNA [XM_341720]                                 | <b>8,468</b> |
| Taar8c       | Rattus norvegicus trace amine-associated receptor 8c (Taar8c), mRNA [NM_175600]                                                     | <b>8,467</b> |
| Xpo6         | Rattus norvegicus exportin 6 (Xpo6), mRNA [NM_001011935]                                                                            | <b>8,465</b> |
| Kptn         | kaptin [Source:RefSeq peptide;Acc:NP_001100927] [ENSRNOT0000002043]                                                                 | <b>8,465</b> |
| Slc7a4       | Rattus norvegicus solute carrier family 7 (cationic amino acid transporter, y+ system), member 4 (Slc7a4), mRNA [NM_001107078]      | <b>8,465</b> |
| Mapk14       | Rattus norvegicus mitogen activated protein kinase 14 (Mapk14), mRNA [NM_031020]                                                    | <b>8,464</b> |
| Pycr1        | pyrroline-5-carboxylate reductase 1 [Source:RefSeq peptide;Acc:NP_001099327] [ENSRNOT00000054949]                                   | <b>8,462</b> |
| Ndufa10l1    | Rattus norvegicus NADH dehydrogenase (ubiquinone) 1 alpha subcomplex 10-like 1 (Ndufa10l1), mRNA [NM_182671]                        | <b>8,462</b> |
| Sema3a       | Rattus norvegicus sema domain, immunoglobulin domain (Ig), short basic domain, secreted, (semaphorin) 3A (Sema3a), mRNA [NM_017310] | <b>8,461</b> |
| Casq2        | Rattus norvegicus calsequestrin 2 (cardiac muscle) (Casq2), nuclear gene encoding mitochondrial protein, mRNA [NM_017131]           | <b>8,460</b> |
| Phf15        | Rattus norvegicus PHD finger protein 15 (Phf15), mRNA [NM_001106998]                                                                | <b>8,460</b> |
| RGD1311952   | Rattus norvegicus similar to Protein C20orf177 (RGD1311952), mRNA [NM_001134551]                                                    | <b>8,459</b> |
| LOC300024    | Lymphocyte antigen 6B [Source:UniProtKB/Swiss-Prot;Acc:Q63317] [ENSRNOT00000009395]                                                 | <b>8,459</b> |
| Serinc3      | Rattus norvegicus serine incorporator 3 (Serinc3), mRNA [NM_001008312]                                                              | <b>8,457</b> |
| Srp68        | Rattus norvegicus signal recognition particle 68 (Srp68), mRNA [NM_001108840]                                                       | <b>8,457</b> |
| Adcy3        | Rattus norvegicus adenylate cyclase 3 (Adcy3), mRNA [NM_130779]                                                                     | <b>8,456</b> |
| Zcchc4       | Rattus norvegicus zinc finger, CCHC domain containing 4 (Zcchc4), mRNA [NM_001108360]                                               | <b>8,456</b> |
| Ctsr         | Rattus norvegicus cathepsin R (Ctsr), mRNA [NM_175581]                                                                              | <b>8,456</b> |
| Fam35a       | Rattus norvegicus family with sequence similarity 35, member A (Fam35a), mRNA [NM_001025028]                                        | <b>8,455</b> |
| Mcm5         | Rattus norvegicus minichromosome maintenance complex component 5 (Mcm5), mRNA [NM_001106170]                                        | <b>8,454</b> |
| Bspry        | Rattus norvegicus B-box and SPRY domain containing (Bspry), mRNA [NM_022261]                                                        | <b>8,453</b> |
| Tubgcp6      | Rattus norvegicus tubulin, gamma complex associated protein 6 (Tubgcp6), mRNA [NM_001108748]                                        | <b>8,453</b> |



|            |                                                                                                                                                 |              |
|------------|-------------------------------------------------------------------------------------------------------------------------------------------------|--------------|
| Dnase2a    | Rattus norvegicus deoxyribonuclease II alpha (Dnase2a), mRNA [NM_138539]                                                                        | <b>8,453</b> |
| Rwdd2b     | Rattus norvegicus RWD domain containing 2B (Rwdd2b), mRNA [NM_001100559]                                                                        | <b>8,453</b> |
| RGD1565192 | Rattus norvegicus similar to 1810013D10Rik protein (RGD1565192), mRNA [NM_001134639]                                                            | <b>8,453</b> |
| 0          | Unknown                                                                                                                                         | <b>8,452</b> |
| Rbak       | Rattus norvegicus RB-associated KRAB zinc finger (Rbak), mRNA [NM_001191664]                                                                    | <b>8,452</b> |
| Olr1557    | Rattus norvegicus olfactory receptor 1557 (Olr1557), mRNA [NM_001000050]                                                                        | <b>8,450</b> |
| LOC691889  | PREDICTED: Rattus norvegicus similar to ATPase, aminophospholipid transporter-like, class I, type 8A, member 2 (LOC691889), miscRNA [XR_086029] | <b>8,449</b> |
| RGD1306520 | Rattus norvegicus similar to receptor-interacting factor 1 (RGD1306520), mRNA [NM_001127485]                                                    | <b>8,448</b> |
| 0          | cadherin, EGF LAG seven-pass G-type receptor 1 (flamingo homolog, Drosophila) Gene [Source:MGI Symbol;Acc:MGI:1100883] [ENSRNOT00000036025]     | <b>8,447</b> |
| RGD1308049 | Uncharacterized protein [Source:UniProtKB/TrEMBL;Acc:D3ZT97] [ENSRNOT00000028509]                                                               | <b>8,446</b> |
| 0          | Unknown                                                                                                                                         | <b>8,443</b> |
| LOC308198  | PREDICTED: Rattus norvegicus similar to serine/threonine kinase (LOC308198), partial mRNA [XM_217963]                                           | <b>8,441</b> |
| 0          | Rattus norvegicus similar to glyceraldehyde-3-phosphate dehydrogenase (phosphorylating) (EC 1.2.1.12) - mouse (LOC300277), mRNA [XM_217067]     | <b>8,441</b> |
| Anapc1     | Rattus norvegicus anaphase promoting complex subunit 1 (Anapc1), mRNA [NM_001107771]                                                            | <b>8,440</b> |
| 0          | Uncharacterized protein [Source:UniProtKB/TrEMBL;Acc:D3ZES0] [ENSRNOT00000031521]                                                               | <b>8,440</b> |
| LOC680155  | Uncharacterized protein [Source:UniProtKB/TrEMBL;Acc:D3ZXU7] [ENSRNOT00000020271]                                                               | <b>8,439</b> |
| Calcr1     | Rattus norvegicus calcitonin receptor-like (Calcr1), mRNA [NM_012717]                                                                           | <b>8,439</b> |
| Znrd1      | Rattus norvegicus zinc ribbon domain containing, 1 (Znrd1), transcript variant 2, mRNA [NM_213567]                                              | <b>8,438</b> |
| Dck        | Rattus norvegicus deoxycytidine kinase (Dck), mRNA [NM_024158]                                                                                  | <b>8,437</b> |
| 0          | Unknown                                                                                                                                         | <b>8,436</b> |
| Plekha4    | Rattus norvegicus pleckstrin homology domain containing, family A (phosphoinositide binding specific) member 4 (Plekha4), mRNA [NM_199101]      | <b>8,436</b> |
| Brd2       | Rattus norvegicus bromodomain containing 2 (Brd2), mRNA [NM_212495]                                                                             | <b>8,435</b> |
| Fcrla      | Rattus norvegicus Fc receptor-like A (Fcrla), mRNA [NM_001100682]                                                                               | <b>8,434</b> |
| LOC691113  | RCG56346Uncharacterized protein [Source:UniProtKB/TrEMBL;Acc:D3Z8R8] [ENSRNOT00000015807]                                                       | <b>8,434</b> |
| Hcn4       | Rattus norvegicus hyperpolarization activated cyclic nucleotide-gated potassium channel 4 (Hcn4), mRNA [NM_021658]                              | <b>8,433</b> |
| 0          | Unknown                                                                                                                                         | <b>8,433</b> |
| 0          | Unknown                                                                                                                                         | <b>8,432</b> |
| Sertad4    | Rattus norvegicus SERTA domain containing 4 (Sertad4), mRNA [NM_001108351]                                                                      | <b>8,432</b> |
| Nuak1      | Rattus norvegicus NUAKE family, SNF1-like kinase, 1 (Nuak1), mRNA [NM_001106774]                                                                | <b>8,432</b> |
| LOC683538  | Uncharacterized protein [Source:UniProtKB/TrEMBL;Acc:D3ZNK1] [ENSRNOT00000061761]                                                               | <b>8,431</b> |

|              |                                                                                                                                                  |       |
|--------------|--------------------------------------------------------------------------------------------------------------------------------------------------|-------|
| Svep1        | Sushi, von Willebrand factor type A, EGF and pentraxin domain-containing protein 1 [Source:UniProtKB/Swiss-Prot;Acc:P0C6B8] [ENSRNOT00000047200] | 8,429 |
| Fktn         | Rattus norvegicus fukutin (Fktn), mRNA [NM_001108667]                                                                                            | 8,429 |
| Agl          | Rattus norvegicus amylo-1,6-glucosidase, 4-alpha-glucanotransferase (Agl), mRNA [NM_001108564]                                                   | 8,429 |
| LOC690576    | PREDICTED: Rattus norvegicus similar to RIKEN cDNA 4930555G01 (RGD1564665), partial mRNA [XM_002727373]                                          | 8,428 |
| Ggcx         | Rattus norvegicus gamma-glutamyl carboxylase (Ggcx), mRNA [NM_031756]                                                                            | 8,426 |
| Mmp25        | PREDICTED: Rattus norvegicus matrix metalloproteinase 25 (Mmp25), mRNA [XM_002742434]                                                            | 8,424 |
| Echdc2       | Rattus norvegicus enoyl Coenzyme A hydratase domain containing 2 (Echdc2), mRNA [NM_001106675]                                                   | 8,424 |
| 0            | Unknown                                                                                                                                          | 8,423 |
| Zfp36        | Rattus norvegicus zinc finger protein 36 (Zfp36), mRNA [NM_133290]                                                                               | 8,422 |
| 0            | Unknown                                                                                                                                          | 8,421 |
| Snw1         | Rattus norvegicus SNW domain containing 1 (Snw1), mRNA [NM_001109279]                                                                            | 8,420 |
| RGD1565283   | Rattus norvegicus similar to novel protein (RGD1565283), mRNA [NM_001109074]                                                                     | 8,416 |
| Dynll2       | Rattus norvegicus dynein light chain LC8-type 2 (Dynll2), mRNA [NM_080697]                                                                       | 8,415 |
| 0            | AB017635 ERCC4 {Cricetulus griseus} (exp=-1; wgp=0; cg=0), partial (26%) [TC614683]                                                              | 8,414 |
| 0            | Uncharacterized protein [Source:UniProtKB/TrEMBL;Acc:D3ZAG8] [ENSRNOT00000037316]                                                                | 8,414 |
| Crlf1        | Rattus norvegicus cytokine receptor-like factor 1 (Crlf1), mRNA [NM_001106074]                                                                   | 8,414 |
| Me1          | Rattus norvegicus malic enzyme 1, NADP(+)-dependent, cytosolic (Me1), mRNA [NM_012600]                                                           | 8,412 |
| Foxo4        | Rattus norvegicus forkhead box O4 (Foxo4), mRNA [NM_001106943]                                                                                   | 8,412 |
| Cpd          | Rattus norvegicus carboxypeptidase D (Cpd), mRNA [NM_012836]                                                                                     | 8,410 |
| RGD1563982   | Rattus norvegicus similar to F-box only protein 27 (RGD1563982), mRNA [NM_001110491]                                                             | 8,409 |
| Timm22       | PREDICTED: Rattus norvegicus translocase of inner mitochondrial membrane 22 homolog (yeast) (Timm22), mRNA [XM_001080619]                        | 8,408 |
| Mcf2         | PREDICTED: Rattus norvegicus MCF.2 cell line derived transforming sequence (Mcf2), mRNA [XM_002727688]                                           | 8,408 |
| LOC100361198 | PREDICTED: Rattus norvegicus rCG43589-like (LOC100361198), mRNA [XM_002730083]                                                                   | 8,407 |
| Ptprh        | Rattus norvegicus protein tyrosine phosphatase, receptor type, H (Ptprh), mRNA [NM_001191945]                                                    | 8,407 |
| Lpgat1       | Rattus norvegicus lysophosphatidylglycerol acyltransferase 1 (Lpgat1), mRNA [NM_001109376]                                                       | 8,406 |
| Cabp7        | Rattus norvegicus calcium binding protein 7 (Cabp7), mRNA [NM_001007730]                                                                         | 8,403 |
| Lrp11        | Rattus norvegicus low density lipoprotein receptor-related protein 11 (Lrp11), mRNA [NM_001106217]                                               | 8,403 |
| Ptprt        | Rattus norvegicus protein tyrosine phosphatase, receptor type, T (Ptprt), mRNA [NM_001108603]                                                    | 8,401 |
| RGD1310852   | Rattus norvegicus similar to RIKEN cDNA 9130401M01 (RGD1310852), mRNA [NM_001025007]                                                             | 8,400 |
| Gpr20        | Rattus norvegicus G protein-coupled receptor 20 (Gpr20), mRNA [NM_022216]                                                                        | 8,400 |
| Xpa          | Rattus norvegicus xeroderma pigmentosum, complementation group A (Xpa), mRNA [NM_001106656]                                                      | 8,398 |
| 0            | Uncharacterized protein [Source:UniProtKB/TrEMBL;Acc:D3ZA96] [ENSRNOT00000034797]                                                                | 8,398 |
| Znf592       | Rattus norvegicus zinc finger protein 592 (Znf592), mRNA [NM_001106272]                                                                          | 8,397 |

|            |                                                                                                                                  |       |
|------------|----------------------------------------------------------------------------------------------------------------------------------|-------|
| Rnf187     | Rattus norvegicus ring finger protein 187 (Rnf187), mRNA [NM_001164264]                                                          | 8,395 |
| Qsox1      | Rattus norvegicus quiescin Q6 sulfhydryl oxidase 1 (Qsox1), transcript variant 2, mRNA [NM_053431]                               | 8,393 |
| Sifn1      | Rattus norvegicus schlafen-like 1 (Sifn1), mRNA [NM_001024347]                                                                   | 8,392 |
| Kat5       | Rattus norvegicus K(lysine) acetyltransferase 5 (Kat5), mRNA [NM_001005872]                                                      | 8,391 |
| RGD1565983 | Rattus norvegicus similar to apurinic/aprimidinic endonuclease 2 (RGD1565983), mRNA [NM_001079892]                               | 8,387 |
| Tbc1d30    | Uncharacterized protein [Source:UniProtKB/TrEMBL;Acc:D3ZG06] [ENSRNOT00000024679]                                                | 8,387 |
| Dnajc17    | Rattus norvegicus DnaJ (Hsp40) homolog, subfamily C, member 17 (Dnajc17), mRNA [NM_001191740]                                    | 8,387 |
| LOC497848  | PREDICTED: Rattus norvegicus hypothetical LOC497848 (LOC497848), miscRNA [XR_007272]                                             | 8,386 |
| Rapgef2    | Rattus norvegicus Rap guanine nucleotide exchange factor (GEF) 2 (Rapgef2), mRNA [NM_001107684]                                  | 8,386 |
| RGD1560672 | Rattus norvegicus similar to novel protein (RGD1560672), mRNA [NM_001109073]                                                     | 8,386 |
| 0          | Uncharacterized protein [Source:UniProtKB/TrEMBL;Acc:D3Z995] [ENSRNOT00000022941]                                                | 8,385 |
| Gpr182     | Rattus norvegicus G protein-coupled receptor 182 (Gpr182), mRNA [NM_053302]                                                      | 8,384 |
| Wdr44      | WD repeat-containing protein 44 [Source:UniProtKB/Swiss-Prot;Acc:Q9R037] [ENSRNOT00000040742]                                    | 8,384 |
| 0          | Unknown                                                                                                                          | 8,383 |
| Unc119b    | Rattus norvegicus unc-119 homolog B (C. elegans) (Unc119b), mRNA [NM_001105934]                                                  | 8,382 |
| Trpm3      | Rattus norvegicus transient receptor potential cation channel, subfamily M, member 3 (Trpm3), mRNA [NM_001191562]                | 8,381 |
| Zfp40      | Rattus norvegicus zinc finger protein 40 (Zfp40), mRNA [NM_001168642]                                                            | 8,380 |
| Rbl2       | Rattus norvegicus retinoblastoma-like 2 (Rbl2), mRNA [NM_031094]                                                                 | 8,378 |
| Serpina5   | Rattus norvegicus serine (or cysteine) peptidase inhibitor, clade A, member 5 (Serpina5), mRNA [NM_022957]                       | 8,377 |
| Gfer       | Rattus norvegicus growth factor, augmenter of liver regeneration (Gfer), mRNA [NM_013222]                                        | 8,377 |
| Hspa4      | Rattus norvegicus heat shock protein 4 (Hspa4), mRNA [NM_153629]                                                                 | 8,377 |
| Psd2       | Rattus norvegicus pleckstrin and Sec7 domain containing 2 (Psd2), mRNA [NM_001107395]                                            | 8,377 |
| 0          | Unknown                                                                                                                          | 8,377 |
| Gpcpd1     | Rattus norvegicus glycerophosphocholine phosphodiesterase GDE1 homolog (S. cerevisiae) (Gpcpd1), mRNA [NM_198779]                | 8,377 |
| Tdrkh      | Rattus norvegicus tudor and KH domain containing (Tdrkh), mRNA [NM_001014038]                                                    | 8,375 |
| Ubtf       | Rattus norvegicus upstream binding transcription factor, RNA polymerase I (Ubtf), transcript variant 2, mRNA [NM_001127690]      | 8,375 |
| Olr160     | Rattus norvegicus olfactory receptor 160 (Olr160), mRNA [NM_001000738]                                                           | 8,375 |
| 0          | Rattus norvegicus similar to heterogeneous nuclear ribonucleoprotein K (LOC294952), mRNA [XM_227009]                             | 8,374 |
| Cadps      | Rattus norvegicus Ca <sup>++</sup> -dependent secretion activator (Cadps), mRNA [NM_013219]                                      | 8,374 |
| Mrpl45     | Rattus norvegicus mitochondrial ribosomal protein L45 (Mrpl45), nuclear gene encoding mitochondrial protein, mRNA [NM_001105834] | 8,373 |
| Slc8a1     | Rattus norvegicus solute carrier family 8 (sodium/calcium exchanger), member 1 (Slc8a1), mRNA [NM_019268]                        | 8,373 |
| 0          | Unknown                                                                                                                          | 8,372 |
| 0          | Unknown                                                                                                                          | 8,370 |
| Pi4kb      | Rattus norvegicus phosphatidylinositol 4-kinase, catalytic, beta (Pi4kb), mRNA [NM_031083]                                       | 8,370 |

|            |                                                                                                                                  |              |
|------------|----------------------------------------------------------------------------------------------------------------------------------|--------------|
| Cttn       | Rattus norvegicus cortactin (Cttn), mRNA [NM_021868]                                                                             | <b>8,370</b> |
| Homer2     | Rattus norvegicus homer homolog 2 (Drosophila) (Homer2), mRNA [NM_053309]                                                        | <b>8,369</b> |
| 0          | Unknown                                                                                                                          | <b>8,369</b> |
| Fam124b    | RCG64106Uncharacterized protein [Source:UniProtKB/TrEMBL;Acc:D4ACJ9] [ENSRNOT00000030626]                                        | <b>8,368</b> |
| 0          | Unknown                                                                                                                          | <b>8,366</b> |
| RGD1564599 | Rattus norvegicus hypothetical protein LOC689600 (LOC689600), mRNA [NM_001106351]                                                | <b>8,366</b> |
| 0          | Rattus norvegicus similar to glutamine repeat protein 1 (LOC365129), mRNA [XM_344830]                                            | <b>8,366</b> |
| Ddit4l     | Rattus norvegicus DNA-damage-inducible transcript 4-like (Ddit4l), mRNA [NM_080399]                                              | <b>8,366</b> |
| Rcan3      | Rattus norvegicus RCAN family member 3 (Rcan3), mRNA [NM_001012746]                                                              | <b>8,365</b> |
| Msh5       | Rattus norvegicus mutS homolog 5 (E. coli) (Msh5), mRNA [NM_212536]                                                              | <b>8,365</b> |
| 0          | Unknown                                                                                                                          | <b>8,364</b> |
| Actn1      | Rattus norvegicus actinin, alpha 1 (Actn1), mRNA [NM_031005]                                                                     | <b>8,364</b> |
| 0          | Uncharacterized protein [Source:UniProtKB/TrEMBL;Acc:D3ZKL6] [ENSRNOT00000044160]                                                | <b>8,362</b> |
| Mpzl2      | Rattus norvegicus myelin protein zero-like 2 (Mpzl2), mRNA [NM_001106818]                                                        | <b>8,362</b> |
| Snurf      | Rattus norvegicus SNRPN upstream reading frame (Snurf), mRNA [NM_130738]                                                         | <b>8,362</b> |
| Tbx1       | Rattus norvegicus T-box 1 (Tbx1), mRNA [NM_001108322]                                                                            | <b>8,361</b> |
| 0          | Unknown                                                                                                                          | <b>8,361</b> |
| RGD1566265 | Rattus norvegicus similar to RIKEN cDNA 2610002M06 (RGD1566265), mRNA [NM_001134589]                                             | <b>8,361</b> |
| Kdm2b      | Rattus norvegicus lysine (K)-specific demethylase 2B (Kdm2b), mRNA [NM_001100679]                                                | <b>8,360</b> |
| Alg12      | Rattus norvegicus asparagine-linked glycosylation 12 homolog (yeast, alpha-1,6-mannosyltransferase) (Alg12), mRNA [NM_001108104] | <b>8,359</b> |
| Txnrd1     | Rattus norvegicus thioredoxin reductase 1 (Txnrd1), mRNA [NM_031614]                                                             | <b>8,358</b> |
| Dmtf1      | Rattus norvegicus cyclin D binding myb-like transcription factor 1 (Dmtf1), mRNA [NM_053693]                                     | <b>8,357</b> |
| Ubtf       | Rattus norvegicus upstream binding transcription factor, RNA polymerase I (Ubtf), transcript variant 1, mRNA [NM_001105723]      | <b>8,357</b> |
| Palld      | Rattus norvegicus similar to palladin; CGI-151 protein, mRNA (cDNA clone MGC:94544 IMAGE:7189104), complete cds. [BC088409]      | <b>8,356</b> |
| Slc45a1    | Rattus norvegicus solute carrier family 45, member 1 (Slc45a1), mRNA [NM_144747]                                                 | <b>8,356</b> |
| Tmem144    | Rattus norvegicus transmembrane protein 144 (Tmem144), mRNA [NM_001108551]                                                       | <b>8,356</b> |
| 0          | Nuclease-sensitive element-binding protein 1 [Source:UniProtKB/Swiss-Prot;Acc:P62961] [ENSRNOT00000058700]                       | <b>8,356</b> |
| 0          | Uncharacterized protein [Source:UniProtKB/TrEMBL;Acc:D4ADJ6] [ENSRNOT00000026340]                                                | <b>8,354</b> |
| Nsmce2     | Rattus norvegicus non-SMC element 2, MMS21 homolog (S. cerevisiae) (Nsmce2), mRNA [NM_001024876]                                 | <b>8,353</b> |
| Trpc1      | Rattus norvegicus transient receptor potential cation channel, subfamily C, member 1 (Trpc1), mRNA [NM_053558]                   | <b>8,353</b> |
| Eci2       | Rattus norvegicus enoyl-Coenzyme A delta isomerase 2 (Eci2), mRNA [NM_001006966]                                                 | <b>8,352</b> |
| Piga       | Rattus norvegicus phosphatidylinositol glycan anchor biosynthesis, class A (Piga), mRNA [NM_001108816]                           | <b>8,352</b> |
| LOC498705  | Rattus norvegicus hypothetical protein LOC498705 (LOC498705), mRNA [NM_001047934]                                                | <b>8,351</b> |
| Col11a2    | Rattus norvegicus collagen, type XI, alpha 2 (Col11a2), mRNA [NM_212528]                                                         | <b>8,350</b> |

|            |                                                                                                                                                                    |       |
|------------|--------------------------------------------------------------------------------------------------------------------------------------------------------------------|-------|
| Oxt        | Rat oxytocin mRNA, complete cds. [M25649]                                                                                                                          | 8,350 |
| 0          | Uncharacterized protein [Source:UniProtKB/TrEMBL;Acc:D3ZW22] [ENSRNOT00000037429]                                                                                  | 8,349 |
| Lclat1     | Similar to lysocardiolipin acyltransferase isoform 1 (Predicted)Uncharacterized protein [Source:UniProtKB/TrEMBL;Acc:D3ZFF4] [ENSRNOT00000043641]                  | 8,348 |
| 0          | Rattus norvegicus similar to glyceraldehyde-3-phosphate dehydrogenase (LOC289349), mRNA [XM_223044]                                                                | 8,347 |
| 0          | Unknown                                                                                                                                                            | 8,347 |
| Zfp9       | Rattus norvegicus zinc finger protein 9 (Zfp9), mRNA [NM_001127635]                                                                                                | 8,345 |
| Tinf2      | Rattus norvegicus TERF1 (TRF1)-interacting nuclear factor 2 (Tinf2), mRNA [NM_001006962]                                                                           | 8,342 |
| 0          | Uncharacterized protein [Source:UniProtKB/TrEMBL;Acc:D3ZZD9] [ENSRNOT00000068382]                                                                                  | 8,341 |
| Etaa1      | Rattus norvegicus Ewing tumor-associated antigen 1 (Etaa1), mRNA [NM_001109094]                                                                                    | 8,341 |
| Taf5l      | Rattus norvegicus TAF5-like RNA polymerase II, p300/CBP-associated factor (PCAF)-associated factor (Taf5l), mRNA [NM_001107442]                                    | 8,341 |
| RGD1563440 | Rattus norvegicus similar to hypothetical protein (RGD1563440), mRNA [NM_001100965]                                                                                | 8,341 |
| Olr775     | Rattus norvegicus olfactory receptor 775 (Olr775), mRNA [NM_001000374]                                                                                             | 8,340 |
| Prep       | Rattus norvegicus prolyl endopeptidase (Prep), mRNA [NM_031324]                                                                                                    | 8,340 |
| Olr1303    | Rattus norvegicus olfactory receptor 1303 (Olr1303), mRNA [NM_001000796]                                                                                           | 8,339 |
| Ccnt2      | Rattus norvegicus cyclin T2 (Ccnt2), mRNA [NM_001107171]                                                                                                           | 8,338 |
| Fosl2      | Rattus norvegicus fos-like antigen 2 (Fosl2), mRNA [NM_012954]                                                                                                     | 8,338 |
| Itfg1      | Rattus norvegicus integrin alpha FG-GAP repeat containing 1 (Itfg1), mRNA [NM_133557]                                                                              | 8,338 |
| Farp1      | Rattus norvegicus FERM, RhoGEF (Arhgef) and pleckstrin domain protein 1 (chondrocyte-derived) (Farp1), mRNA [NM_001107287]                                         | 8,336 |
| Tubg1      | Rattus norvegicus tubulin, gamma 1 (Tubg1), mRNA [NM_145778]                                                                                                       | 8,336 |
| Prl8a3     | Rattus norvegicus prolactin family 8, subfamily a, member 3 (Prl8a3), mRNA [NM_020079]                                                                             | 8,336 |
| Ogt        | Rattus norvegicus O-linked N-acetylglucosamine (GlcNAc) transferase (UDP-N-acetylglucosamine:polypeptide-N-acetylglucosaminyl transferase) (Ogt), mRNA [NM_017107] | 8,335 |
| Yars       | Rattus norvegicus tyrosyl-tRNA synthetase (Yars), mRNA [NM_001025696]                                                                                              | 8,335 |
| Gss        | Rattus norvegicus glutathione synthetase (Gss), mRNA [NM_012962]                                                                                                   | 8,334 |
| LOC679989  | PREDICTED: Rattus norvegicus similar to t-complex 11 protein (LOC679989), mRNA [XM_001055198]                                                                      | 8,331 |
| Ccdc126    | Rattus norvegicus coiled-coil domain containing 126 (Ccdc126), mRNA [NM_001109232]                                                                                 | 8,330 |
| 0          | Uncharacterized protein [Source:UniProtKB/TrEMBL;Acc:D3ZER7] [ENSRNOT00000043011]                                                                                  | 8,330 |
| Wwp2       | Rattus norvegicus WW domain containing E3 ubiquitin protein ligase 2 (Wwp2), mRNA [NM_001106184]                                                                   | 8,329 |
| C1d        | Rattus norvegicus C1D nuclear receptor co-repressor (C1d), mRNA [NM_001106021]                                                                                     | 8,327 |
| Podxl2     | Rattus norvegicus podocalyxin-like 2 (Podxl2), mRNA [NM_001106607]                                                                                                 | 8,327 |
| 0          | Uncharacterized protein [Source:UniProtKB/TrEMBL;Acc:D3ZJS8] [ENSRNOT00000037641]                                                                                  | 8,327 |
| Rwdd1      | Rattus norvegicus RWD domain containing 1 (Rwdd1), mRNA [NM_147146]                                                                                                | 8,327 |
| Fam164a    | Rattus norvegicus family with sequence similarity 164, member A (Fam164a), mRNA [NM_001107661]                                                                     | 8,327 |

|            |                                                                                                                  |       |
|------------|------------------------------------------------------------------------------------------------------------------|-------|
| Crlf1      | Rattus norvegicus cytokine receptor-like factor 1 (Crlf1), mRNA [NM_001106074]                                   | 8,323 |
| Tmem81     | Rattus norvegicus transmembrane protein 81 (Tmem81), mRNA [NM_001017490]                                         | 8,322 |
| Spast      | Rattus norvegicus spastin (Spast), mRNA [NM_001108702]                                                           | 8,321 |
| 0          | Unknown                                                                                                          | 8,321 |
| Tpmt       | thiopurine S-methyltransferase [Source:RefSeq peptide;Acc:NP_001072999] [ENSRNOT00000022085]                     | 8,321 |
| Ccdc102a   | Rattus norvegicus coiled-coil domain containing 102A (Ccdc102a), mRNA [NM_001108437]                             | 8,319 |
| 0          | Unknown                                                                                                          | 8,318 |
| Adamts15   | Rattus norvegicus ADAM metalloproteinase with thrombospondin type 1 motif, 15 (Adamts15), mRNA [NM_001106810]    | 8,317 |
| 0          | Unknown                                                                                                          | 8,317 |
| 0          | Neuronal cell adhesion molecule [Source:UniProtKB/Swiss-Prot;Acc:P97686] [ENSRNOT00000059737]                    | 8,316 |
| Gns        | Rattus norvegicus glucosamine (N-acetyl)-6-sulfatase (Gns), mRNA [NM_001011989]                                  | 8,314 |
| Pde3b      | Rattus norvegicus phosphodiesterase 3B, cGMP-inhibited (Pde3b), mRNA [NM_017229]                                 | 8,311 |
| Pard6b     | Rattus norvegicus par-6 (partitioning defective 6) homolog beta (C. elegans) (Pard6b), mRNA [NM_001108609]       | 8,309 |
| 0          | Band 4.1-like protein 4B [Source:UniProtKB/Swiss-Prot;Acc:B2RYE5] [ENSRNOT00000014982]                           | 8,306 |
| Anxa6      | Rattus norvegicus annexin A6 (Anxa6), mRNA [NM_024156]                                                           | 8,306 |
| 0          | RVL9223 Wackym-Soares normalized rat vestibular cDNA library Rattus norvegicus cDNA 5', mRNA sequence [DV718613] | 8,306 |
| LOC689412  | Rattus norvegicus similar to CG4025-PA (LOC689412), mRNA [NM_001109538]                                          | 8,302 |
| Isyna1     | Rattus norvegicus inositol-3-phosphate synthase 1 (Isyna1), mRNA [NM_001013880]                                  | 8,302 |
| Ube2b      | Rattus norvegicus ubiquitin-conjugating enzyme E2B (RAD6 homolog, S. cerevisiae) (Ube2b), mRNA [NM_031138]       | 8,301 |
| Resp18     | Rattus norvegicus regulated endocrine-specific protein 18 (Resp18), mRNA [NM_019278]                             | 8,301 |
| Nr3c1      | Rattus norvegicus nuclear receptor subfamily 3, group C, member 1 (Nr3c1), mRNA [NM_012576]                      | 8,300 |
| Asah1      | Rattus norvegicus N-acylsphingosine amidohydrolase (acid ceramidase) 1 (Asah1), mRNA [NM_053407]                 | 8,299 |
| 0          | Unknown                                                                                                          | 8,298 |
| Gtpbp4     | Rattus norvegicus GTP binding protein 4 (Gtpbp4), mRNA [NM_053689]                                               | 8,297 |
| Pomt2      | Rattus norvegicus protein-O-mannosyltransferase 2 (Pomt2), mRNA [NM_001047114]                                   | 8,293 |
| MGC94891   | Rattus norvegicus hypothetical protein LOC681210 (MGC94891), mRNA [NM_001044277]                                 | 8,292 |
| RGD1562351 | Rattus norvegicus similar to chromosome 7 open reading frame 23 (RGD1562351), mRNA [NM_001109219]                | 8,292 |
| Olr1338    | Rattus norvegicus olfactory receptor 1338 (Olr1338), mRNA [NM_001000789]                                         | 8,290 |
| Cep68      | Uncharacterized protein [Source:UniProtKB/TrEMBL;Acc:D3ZZ61] [ENSRNOT00000039523]                                | 8,290 |
| Irf1       | Rattus norvegicus interferon regulatory factor 1 (Irf1), mRNA [NM_012591]                                        | 8,290 |
| Capns1     | Rattus norvegicus calpain, small subunit 1 (Capns1), mRNA [NM_017118]                                            | 8,289 |
| Ccar1      | Rattus norvegicus cell division cycle and apoptosis regulator 1 (Ccar1), mRNA [NM_001108535]                     | 8,289 |
| LOC690479  | Uncharacterized protein [Source:UniProtKB/TrEMBL;Acc:D3ZTZ5] [ENSRNOT00000034798]                                | 8,287 |
| Hcfc1      | Rattus norvegicus host cell factor C1 (Hcfc1), mRNA [NM_001139507]                                               | 8,287 |

|            |                                                                                                                                              |       |
|------------|----------------------------------------------------------------------------------------------------------------------------------------------|-------|
| Dcp1b      | Similar to decapping enzyme Dcp1b (Predicted), isoform CRA_aUncharacterized protein [Source:UniProtKB/TrEMBL;Acc:D3ZZJ7] [ENSRNOT0000009832] | 8,285 |
| Dus4l      | Rattus norvegicus dihydrouridine synthase 4-like ( <i>S. cerevisiae</i> ) (Dus4l), mRNA [NM_001135803]                                       | 8,285 |
| 0          | Unknown                                                                                                                                      | 8,284 |
| 0          | Unknown                                                                                                                                      | 8,284 |
| Stk36      | Rattus norvegicus serine/threonine kinase 36 (fused homolog, <i>Drosophila</i> ) (Stk36), mRNA [NM_001173986]                                | 8,282 |
| Slc7a10    | Rattus norvegicus solute carrier family 7, (neutral amino acid transporter, y+ system) member 10 (Slc7a10), mRNA [NM_053726]                 | 8,282 |
| 0          | Unknown                                                                                                                                      | 8,282 |
| Pomt2      | Rattus norvegicus protein-O-mannosyltransferase 2 (Pomt2), mRNA [NM_001047114]                                                               | 8,282 |
| Gjc2       | Rattus norvegicus gap junction protein, gamma 2 (Gjc2), mRNA [NM_001100784]                                                                  | 8,282 |
| Vps37a     | Rattus norvegicus vacuolar protein sorting 37 homolog A ( <i>S. cerevisiae</i> ) (Vps37a), mRNA [NM_001024867]                               | 8,282 |
| Lrig2      | Rattus norvegicus leucine-rich repeats and immunoglobulin-like domains 2 (Lrig2), mRNA [NM_001107710]                                        | 8,280 |
| RGD1565257 | Rattus norvegicus similar to zinc finger protein 650 (RGD1565257), mRNA [NM_001134550]                                                       | 8,279 |
| Ppp4c      | Rattus norvegicus protein phosphatase 4, catalytic subunit (Ppp4c), mRNA [NM_134359]                                                         | 8,278 |
| Ppp2r5e    | Rattus norvegicus protein phosphatase 2, regulatory subunit B', epsilon isoform (Ppp2r5e), mRNA [NM_001106740]                               | 8,278 |
| Igsf10     | Rattus norvegicus immunoglobulin superfamily, member 10 (Igsf10), mRNA [NM_198768]                                                           | 8,277 |
| 0          | Unknown                                                                                                                                      | 8,277 |
| Olr1375    | Rattus norvegicus olfactory receptor 1375 (Olr1375), mRNA [NM_214829]                                                                        | 8,277 |
| 0          | Unknown                                                                                                                                      | 8,277 |
| 0          | Uncharacterized protein [Source:UniProtKB/TrEMBL;Acc:D4A3B3] [ENSRNOT00000065050]                                                            | 8,277 |
| Adss       | Rattus norvegicus adenylosuccinate synthase (Adss), mRNA [NM_001105975]                                                                      | 8,277 |
| Plekhh3    | Rattus norvegicus pleckstrin homology domain containing, family H (with MyTH4 domain) member 3 (Plekhh3), mRNA [NM_001037202]                | 8,277 |
| RGD1311078 | Rattus norvegicus LOC360664 (RGD1311078), mRNA [NM_001108307]                                                                                | 8,277 |
| Dok4       | Rattus norvegicus docking protein 4 (Dok4), mRNA [NM_001108438]                                                                              | 8,276 |
| Rae1       | Rattus norvegicus RAE1 RNA export 1 homolog ( <i>S. pombe</i> ) (Rae1), mRNA [NM_001033708]                                                  | 8,275 |
| Cnfn       | Rattus norvegicus cornifelin (Cnfn), mRNA [NM_001108909]                                                                                     | 8,275 |
| Cd300lg    | PREDICTED: Rattus norvegicus Cd300 molecule-like family member G, transcript variant 1 (Cd300lg), mRNA [XM_001061779]                        | 8,274 |
| 0          | Unknown                                                                                                                                      | 8,272 |
| 0          | Unknown                                                                                                                                      | 8,272 |
| Mcm3       | Rattus norvegicus minichromosome maintenance complex component 3 (Mcm3), mRNA [NM_001191805]                                                 | 8,271 |
| Lsm1       | Rattus norvegicus LSM1 homolog, U6 small nuclear RNA associated ( <i>S. cerevisiae</i> ) (Lsm1), mRNA [NM_001108876]                         | 8,271 |
| 0          | Unknown                                                                                                                                      | 8,270 |
| 0          | Unknown                                                                                                                                      | 8,270 |
| Mif4gd     | Rattus norvegicus MIF4G domain containing (Mif4gd), mRNA [NM_001014122]                                                                      | 8,269 |

|            |                                                                                                                                    |       |
|------------|------------------------------------------------------------------------------------------------------------------------------------|-------|
| RGD1309888 | Rattus norvegicus similar to RIKEN cDNA 1500002O20 (RGD1309888), mRNA [NM_001014243]                                               | 8,268 |
| Cd2bp2     | Rattus norvegicus Cd2 (cytoplasmic tail) binding protein 2 (Cd2bp2), mRNA [NM_001106297]                                           | 8,267 |
| Sft2d1     | Rattus norvegicus SFT2 domain containing 1 (Sft2d1), mRNA [NM_001008302]                                                           | 8,266 |
| 0          | Solute carrier family 25 member 40 [Source:UniProtKB/Swiss-Prot;Acc:Q498U3] [ENSRNOT00000030352]                                   | 8,266 |
| Psme1      | Rattus norvegicus proteasome (prosome, macropain) activator subunit 1 (Psme1), mRNA [NM_017264]                                    | 8,264 |
| Il17re     | Rattus norvegicus interleukin 17 receptor E (Il17re), mRNA [NM_001004091]                                                          | 8,263 |
| 0          | Unknown                                                                                                                            | 8,262 |
| 0          | Rattus norvegicus similar to RIKEN cDNA 1700001F09 (LOC364257), mRNA [XM_344300]                                                   | 8,260 |
| Pex5       | Rattus norvegicus peroxisomal biogenesis factor 5 (Pex5), mRNA [NM_001170584]                                                      | 8,259 |
| Olr286     | Rattus norvegicus olfactory receptor 286 (Olr286), mRNA [NM_001000554]                                                             | 8,258 |
| Olr115     | Rattus norvegicus olfactory receptor 115 (Olr115), mRNA [NM_001000152]                                                             | 8,258 |
| Tex101     | Rattus norvegicus testis expressed 101 (Tex101), mRNA [NM_139037]                                                                  | 8,258 |
| Trnp1      | Uncharacterized protein [Source:UniProtKB/TrEMBL;Acc:D3ZTW4] [ENSRNOT00000032841]                                                  | 8,257 |
| Gstm3      | Rattus norvegicus glutathione S-transferase mu 3 (Gstm3), mRNA [NM_020540]                                                         | 8,256 |
| Tmem90b    | Rattus norvegicus transmembrane protein 90B (Tmem90b), mRNA [NM_001025020]                                                         | 8,254 |
| 0          | Uncharacterized protein [Source:UniProtKB/TrEMBL;Acc:D3ZC82] [ENSRNOT00000030501]                                                  | 8,252 |
| Crip3      | Rattus norvegicus cysteine-rich protein 3 (Crip3), mRNA [NM_001109303]                                                             | 8,252 |
| Ptpn14     | Rattus norvegicus protein tyrosine phosphatase, non-receptor type 14 (Ptpn14), mRNA [NM_001107200]                                 | 8,252 |
| 0          | Unknown                                                                                                                            | 8,250 |
| Dnajb2     | Rattus norvegicus DnaJ (Hsp40) homolog, subfamily B, member 2 (Dnajb2), mRNA [NM_001109541]                                        | 8,249 |
| LOC679800  | PREDICTED: Rattus norvegicus similar to MIC2 like 1 (LOC679800), mRNA [XM_001054523]                                               | 8,249 |
| 0          | Unknown                                                                                                                            | 8,248 |
| LOC301521  | PREDICTED: Rattus norvegicus Coiled-coil domain containing 108-like (LOC301521), mRNA [XM_002730048]                               | 8,247 |
| Ifitm3     | Rattus norvegicus interferon induced transmembrane protein 3 (Ifitm3), mRNA [NM_001136124]                                         | 8,245 |
| 0          | Uncharacterized protein [Source:UniProtKB/TrEMBL;Acc:D3ZVS0] [ENSRNOT00000035275]                                                  | 8,245 |
| 0          | Uncharacterized protein [Source:UniProtKB/TrEMBL;Acc:D3ZKR9] [ENSRNOT00000022373]                                                  | 8,242 |
| Nfkbie     | Rattus norvegicus nuclear factor of kappa light polypeptide gene enhancer in B-cells inhibitor, epsilon (Nfkbie), mRNA [NM_199111] | 8,241 |
| 0          | Unknown                                                                                                                            | 8,236 |
| Znf746     | Rattus norvegicus zinc finger protein 746 (Znf746), mRNA [NM_001100852]                                                            | 8,235 |
| MGC95152   | Rattus norvegicus similar to B230212L03Rik protein (MGC95152), mRNA [NM_001007645]                                                 | 8,235 |
| Eif4e      | Rattus norvegicus eukaryotic translation initiation factor 4E (Eif4e), mRNA [NM_053974]                                            | 8,232 |
| Cnot6      | Rattus norvegicus CCR4-NOT transcription complex, subunit 6 (Cnot6), mRNA [NM_001013856]                                           | 8,229 |
| Snurf      | Rattus norvegicus SNRPN upstream reading frame (Snurf), mRNA [NM_130738]                                                           | 8,228 |
| Olr1462    | Rattus norvegicus olfactory receptor 1462 (Olr1462), mRNA [NM_001001097]                                                           | 8,227 |



|            |                                                                                                                                   |       |
|------------|-----------------------------------------------------------------------------------------------------------------------------------|-------|
| Prss34     | Rattus norvegicus protease, serine, 34 (Prss34), mRNA [NM_001105772]                                                              | 8,227 |
| Iqgap3     | Rattus norvegicus IQ motif containing GTPase activating protein 3 (Iqgap3), mRNA [NM_001191709]                                   | 8,227 |
| RGD1310271 | RCG31097, isoform CRA_aUncharacterized protein [Source:UniProtKB/TrEMBL;Acc:D3ZMX5] [ENSRNOT00000027564]                          | 8,226 |
| Pik3cd     | Rattus norvegicus phosphoinositide-3-kinase, catalytic, delta polypeptide (Pik3cd), mRNA [NM_001108978]                           | 8,225 |
| 0          | Unknown                                                                                                                           | 8,224 |
| 0          | RCG26214Uncharacterized protein [Source:UniProtKB/TrEMBL;Acc:D3ZVK4] [ENSRNOT00000028891]                                         | 8,224 |
| Cp110      | Rattus norvegicus CP110 protein (Cp110), mRNA [NM_001108501]                                                                      | 8,224 |
| Ccdc48     | Rattus norvegicus coiled-coil domain containing 48 (Ccdc48), mRNA [NM_001163921]                                                  | 8,224 |
| Ncstn      | Rattus norvegicus nicastrin (Ncstn), mRNA [NM_174864]                                                                             | 8,222 |
| Prp2l1     | Rat proline-rich protein (PRP-1) [Source:UniProtKB/TrEMBL;Acc:Q63455] [ENSRNOT00000004642]                                        | 8,222 |
| Acer2      | Rattus norvegicus alkaline ceramidase 2 (Acer2), mRNA [NM_001107943]                                                              | 8,222 |
| LOC691807  | Uncharacterized protein C4orf3 homolog [Source:UniProtKB/Swiss-Prot;Acc:Q498U0] [ENSRNOT00000019647]                              | 8,221 |
| 0          | Unknown                                                                                                                           | 8,220 |
| 0          | Uncharacterized protein [Source:UniProtKB/TrEMBL;Acc:D3ZQH1] [ENSRNOT00000001957]                                                 | 8,218 |
| Tmem63c    | Rattus norvegicus transmembrane protein 63c (Tmem63c), mRNA [NM_001108045]                                                        | 8,218 |
| Nqo1       | Rattus norvegicus NAD(P)H dehydrogenase, quinone 1 (Nqo1), mRNA [NM_017000]                                                       | 8,218 |
| Apoo       | Rattus norvegicus apolipoprotein O (Apoo), mRNA [NM_001199178]                                                                    | 8,218 |
| LOC680758  | PREDICTED: Rattus norvegicus similar to spermatogenesis associated glutamate (E)-rich protein 4d (LOC680758), mRNA [XM_001058748] | 8,216 |
| Nup98      | Rattus norvegicus nucleoporin 98 (Nup98), mRNA [NM_031074]                                                                        | 8,216 |
| Them4      | Rattus norvegicus thioesterase superfamily member 4 (Them4), mRNA [NM_001025017]                                                  | 8,216 |
| 0          | Unknown                                                                                                                           | 8,215 |
| Rims4      | Rattus norvegicus regulating synaptic membrane exocytosis 4 (Rims4), mRNA [NM_170666]                                             | 8,215 |
| 0          | Unknown                                                                                                                           | 8,214 |
| Fam98a     | Rattus norvegicus family with sequence similarity 98, member A (Fam98a), mRNA [NM_001014073]                                      | 8,214 |
| Gpr177     | Rattus norvegicus G protein-coupled receptor 177 (Gpr177), transcript variant 1, mRNA [NM_199408]                                 | 8,213 |
| Zfp386     | Rattus norvegicus zinc finger protein 386 (Kruppel-like) (Zfp386), mRNA [NM_019620]                                               | 8,212 |
| 0          | Uncharacterized protein [Source:UniProtKB/TrEMBL;Acc:D3ZRC6] [ENSRNOT00000050943]                                                 | 8,212 |
| Mgea5      | Rattus norvegicus meningioma expressed antigen 5 (hyaluronidase) (Mgea5), mRNA [NM_131904]                                        | 8,211 |
| Akr1cl2    | Rattus norvegicus aldo-keto reductase family 1, member C-like 2 (Akr1cl2), mRNA [NM_001008342]                                    | 8,210 |
| Gabra2     | Rattus norvegicus gamma-aminobutyric acid (GABA-A) receptor, subunit alpha 2 (Gabra2), mRNA [NM_001135779]                        | 8,209 |
| 0          | Unknown                                                                                                                           | 8,208 |
| 0          | Unknown                                                                                                                           | 8,207 |
| RGD1564804 | Rattus norvegicus similar to chromosome 1 open reading frame 50 (RGD1564804), mRNA [NM_001107969]                                 | 8,207 |
| LOC683684  | PREDICTED: Rattus norvegicus hypothetical protein LOC683684 (LOC683684), mRNA [XM_001067050]                                      | 8,206 |

|              |                                                                                                                                                                                                         |       |
|--------------|---------------------------------------------------------------------------------------------------------------------------------------------------------------------------------------------------------|-------|
| Fip111       | Rattus norvegicus FIP1 like 1 ( <i>S. cerevisiae</i> ) (Fip111), mRNA [NM_001008295]                                                                                                                    | 8,206 |
| Mylk2        | Rattus norvegicus myosin light chain kinase 2 (Mylk2), mRNA [NM_057209]                                                                                                                                 | 8,205 |
| Gpr153       | Rattus norvegicus G protein-coupled receptor 153 (Gpr153), mRNA [NM_001034855]                                                                                                                          | 8,204 |
| Ttc5         | Rattus norvegicus tetratricopeptide repeat domain 5 (Ttc5), mRNA [NM_001013131]                                                                                                                         | 8,203 |
| Tmem123      | Rattus norvegicus transmembrane protein 123 (Tmem123), mRNA [NM_001014205]                                                                                                                              | 8,203 |
| Wwtr1        | Rattus norvegicus WW domain containing transcription regulator 1 (Wwtr1), mRNA [NM_001024869]                                                                                                           | 8,201 |
| Zfp354a      | Rattus norvegicus zinc finger protein 354A (Zfp354a), mRNA [NM_052798]                                                                                                                                  | 8,201 |
| LOC100360599 | PREDICTED: Rattus norvegicus rCG33743-like (LOC100360599), mRNA [XM_002724606]                                                                                                                          | 8,200 |
| Prnd         | Rattus norvegicus prion protein 2 (dublet) (Prnd), mRNA [NM_001102431]                                                                                                                                  | 8,199 |
| Mrps21       | Rattus norvegicus mitochondrial ribosomal protein S21 (Mrps21), nuclear gene encoding mitochondrial protein, mRNA [NM_001126094]                                                                        | 8,196 |
| Lin9         | PREDICTED: Rattus norvegicus lin-9 homolog ( <i>C. elegans</i> ) (Lin9), mRNA [XM_001067807]                                                                                                            | 8,192 |
| Pglyrp1      | Rattus norvegicus peptidoglycan recognition protein 1 (Pglyrp1), mRNA [NM_053373]                                                                                                                       | 8,191 |
| RGD1310964   | Rattus norvegicus similar to RIKEN cDNA 9430031J16 (RGD1310964), mRNA [NM_001107132]                                                                                                                    | 8,190 |
| 0            | Uncharacterized protein [Source:UniProtKB/TrEMBL;Acc:D3ZJC7] [ENSRNOT00000068355]                                                                                                                       | 8,190 |
| Poldip3      | Rattus norvegicus polymerase (DNA-directed), delta interacting protein 3 (Poldip3), mRNA [NM_001130506]                                                                                                 | 8,190 |
| Ipo13        | Rattus norvegicus importin 13 (Ipo13), mRNA [NM_053778]                                                                                                                                                 | 8,189 |
| 0            | Histone H3 [Source:UniProtKB/TrEMBL;Acc:D3ZCY4] [ENSRNOT00000043897]                                                                                                                                    | 8,189 |
| Enc1         | Rattus norvegicus ectodermal-neural cortex 1 (Enc1), mRNA [NM_001003401]                                                                                                                                | 8,187 |
| Ube2f        | Rattus norvegicus ubiquitin-conjugating enzyme E2F (putative) (Ube2f), mRNA [NM_001008381]                                                                                                              | 8,186 |
| RT1-CE2      | Rattus norvegicus RT1 class I, locus CE2 (RT1-CE2), mRNA [NM_001008840]                                                                                                                                 | 8,183 |
| Prpf19       | Rattus norvegicus PRP19/PSO4 pre-mRNA processing factor 19 homolog ( <i>S. cerevisiae</i> ) (Prpf19), mRNA [NM_139333]                                                                                  | 8,183 |
| Tspan6       | Rattus norvegicus tetraspanin 6 (Tspan6), mRNA [NM_001100672]                                                                                                                                           | 8,182 |
| LOC680489    | Rattus norvegicus similar to claudin 1 (LOC680489), mRNA [NM_001109415]                                                                                                                                 | 8,181 |
| Cd14         | Rattus norvegicus CD14 molecule (Cd14), mRNA [NM_021744]                                                                                                                                                | 8,181 |
| LOC501810    | PREDICTED: Rattus norvegicus similar to Leukosialin precursor (Leucocyte sialoglycoprotein) (Sialophorin) (Ly-48) (B cell differentiation antigen LP-3) (CD43 antigen) (LOC501810), miscRNA [XR_005724] | 8,181 |
| Cyp7b1       | Rattus norvegicus cytochrome P450, family 7, subfamily b, polypeptide 1 (Cyp7b1), mRNA [NM_019138]                                                                                                      | 8,179 |
| C1qtnf6      | Rattus norvegicus C1q and tumor necrosis factor related protein 6 (C1qtnf6), mRNA [NM_001034932]                                                                                                        | 8,178 |
| Dclk2        | Rattus norvegicus doublecortin-like kinase 2 (Dclk2), transcript variant 2, mRNA [NM_001009691]                                                                                                         | 8,177 |
| LOC682404    | PREDICTED: Rattus norvegicus similar to CG12929-PA (LOC682404), mRNA [XM_001061367]                                                                                                                     | 8,177 |
| 0            | Unknown                                                                                                                                                                                                 | 8,176 |
| 0            | Uncharacterized protein [Source:UniProtKB/TrEMBL;Acc:D3ZDE7] [ENSRNOT00000049155]                                                                                                                       | 8,175 |
| Ank3         | Rattus norvegicus ankyrin 3, node of Ranvier (Ank3), transcript variant 2, mRNA [NM_001033984]                                                                                                          | 8,173 |
| LOC100360189 | PREDICTED: Rattus norvegicus rCG56785-like (LOC100360189), mRNA [XM_002730167]                                                                                                                          | 8,172 |

|            |                                                                                                                                          |       |
|------------|------------------------------------------------------------------------------------------------------------------------------------------|-------|
| Klh23      | Rattus norvegicus kelch-like 23 (Drosophila) (Klh23), mRNA [NM_001134504]                                                                | 8,171 |
| Nap115     | Rattus norvegicus nucleosome assembly protein 1-like 5 (Nap115), mRNA [NM_001044293]                                                     | 8,171 |
| Tmem50a    | Rattus norvegicus transmembrane protein 50A (Tmem50a), mRNA [NM_001127525]                                                               | 8,170 |
| Ube3c      | PREDICTED: Rattus norvegicus ubiquitin protein ligase E3C (Ube3c), mRNA [XM_001055148]                                                   | 8,170 |
| Pja2       | Rattus norvegicus praja 2, RING-H2 motif containing (Pja2), mRNA [NM_138896]                                                             | 8,169 |
| 0          | predicted gene 10022 Gene [Source:MGI Symbol;Acc:MGI:3809058] [ENSRNOT00000037001]                                                       | 8,168 |
| Sephs1     | Rattus norvegicus selenophosphate synthetase 1 (Sephs1), mRNA [NM_001104630]                                                             | 8,168 |
| Zc3h15     | Rattus norvegicus zinc finger CCCH-type containing 15 (Zc3h15), mRNA [NM_001010963]                                                      | 8,167 |
| Nr2f6      | Rattus norvegicus nuclear receptor subfamily 2, group F, member 6 (Nr2f6), mRNA [NM_139113]                                              | 8,167 |
| 0          | Unknown                                                                                                                                  | 8,167 |
| Aldh1b1    | Rattus norvegicus aldehyde dehydrogenase 1 family, member B1 (Aldh1b1), nuclear gene encoding mitochondrial protein, mRNA [NM_001011975] | 8,165 |
| Ropn1l     | Rattus norvegicus ropporin 1-like (Ropn1l), mRNA [NM_001191086]                                                                          | 8,164 |
| Cd46       | Rattus norvegicus CD46 molecule, complement regulatory protein (Cd46), mRNA [NM_019190]                                                  | 8,163 |
| Rbm9       | Rattus norvegicus RNA binding motif protein 9 (Rbm9), mRNA [NM_001079895]                                                                | 8,163 |
| Dab2ip     | Rattus norvegicus DAB2 interacting protein (Dab2ip), mRNA [NM_138710]                                                                    | 8,162 |
| 0          | Proprotein convertase subtilisin/kexin type 5 [Source:UniProtKB/Swiss-Prot;Acc:P41413] [ENSRNOT00000016164]                              | 8,162 |
| Zfp444     | Rattus norvegicus zinc finger protein 444 (Zfp444), mRNA [NM_001169143]                                                                  | 8,162 |
| Pola1      | Rattus norvegicus polymerase (DNA directed), alpha 1 (Pola1), mRNA [NM_053479]                                                           | 8,161 |
| 0          | Unknown                                                                                                                                  | 8,159 |
| Ap2a1      | adaptor-related protein complex 2, alpha 1 subunit [Source:RefSeq peptide;Acc:NP_001100981] [ENSRNOT00000020304]                         | 8,159 |
| Pdlim1     | Rattus norvegicus PDZ and LIM domain 1 (Pdlim1), mRNA [NM_017365]                                                                        | 8,157 |
| Sit1       | Rattus norvegicus signaling threshold regulating transmembrane adaptor 1 (Sit1), mRNA [NM_001024344]                                     | 8,157 |
| RGD1561426 | PREDICTED: Rattus norvegicus RGD1561426 (RGD1561426), mRNA [XM_001069564]                                                                | 8,156 |
| 0          | Uncharacterized protein [Source:UniProtKB/TrEMBL;Acc:D3Z9M1] [ENSRNOT00000056416]                                                        | 8,156 |
| 0          | Unknown                                                                                                                                  | 8,155 |
| Rbm7       | Rattus norvegicus RNA binding motif protein 7 (Rbm7), mRNA [NM_001108143]                                                                | 8,154 |
| 0          | Unknown                                                                                                                                  | 8,154 |
| Ptpn5      | Rattus norvegicus protein tyrosine phosphatase, non-receptor type 5 (Ptpn5), mRNA [NM_019253]                                            | 8,154 |
| 0          | Unknown                                                                                                                                  | 8,154 |
| Wdr78      | Rattus norvegicus WD repeat domain 78 (Wdr78), mRNA [NM_001024786]                                                                       | 8,153 |
| LOC305806  | Rattus norvegicus similar to glutaredoxin 1 (thioltransferase); glutaredoxin (LOC305806), mRNA [NM_001013993]                            | 8,153 |
| Sgsm2      | Rattus norvegicus small G protein signaling modulator 2 (Sgsm2), mRNA [NM_001107020]                                                     | 8,153 |
| Ing1       | Rattus norvegicus inhibitor of growth family, member 1 (Ing1), mRNA [NM_001038591]                                                       | 8,152 |
| 0          | PREDICTED: Rattus norvegicus rCG58102-like (LOC100363350), mRNA [XM_002729901]                                                           | 8,152 |

|            |                                                                                                                                                 |       |
|------------|-------------------------------------------------------------------------------------------------------------------------------------------------|-------|
| Mtnr1a     | Rattus norvegicus melatonin receptor 1A (Mtnr1a), mRNA [NM_053676]                                                                              | 8,151 |
| 0          | Uncharacterized protein [Source:UniProtKB/TrEMBL;Acc:D3ZHQ9] [ENSRNOT00000045241]                                                               | 8,150 |
| Ptpn       | Rattus norvegicus protein tyrosine phosphatase, receptor type, N (Ptpn), mRNA [NM_053881]                                                       | 8,149 |
| RGD1563904 | Rattus norvegicus similar to melanoma antigen family B, 4 (RGD1563904), mRNA [NM_001109367]                                                     | 8,149 |
| 0          | Uncharacterized protein [Source:UniProtKB/TrEMBL;Acc:D3ZQT0] [ENSRNOT00000011090]                                                               | 8,147 |
| Fbxo15     | Rattus norvegicus F-box protein 15 (Fbxo15), mRNA [NM_001108436]                                                                                | 8,146 |
| RGD1308470 | Rattus norvegicus similar to RIKEN cDNA 4933433P14 gene (RGD1308470), mRNA [NM_001014198]                                                       | 8,146 |
| Lins1      | Uncharacterized protein [Source:UniProtKB/TrEMBL;Acc:D3ZVQ9] [ENSRNOT00000018463]                                                               | 8,145 |
| Mas1       | Rattus norvegicus MAS1 oncogene (Mas1), mRNA [NM_012757]                                                                                        | 8,145 |
| RGD1563956 | Uncharacterized protein [Source:UniProtKB/TrEMBL;Acc:D4A8N3] [ENSRNOT00000030686]                                                               | 8,143 |
| Krt4       | Rattus norvegicus keratin 4 (Krt4), mRNA [NM_001008806]                                                                                         | 8,142 |
| RGD1311122 | Rattus norvegicus similar to RIKEN cDNA 1110003E01 (RGD1311122), mRNA [NM_001037792]                                                            | 8,142 |
| 0          | Unknown                                                                                                                                         | 8,141 |
| 0          | Kinesin-like protein KIF1B [Source:UniProtKB/Swiss-Prot;Acc:O88658] [ENSRNOT00000029605]                                                        | 8,141 |
| 38231      | Rattus norvegicus septin 4 (Sept4), nuclear gene encoding mitochondrial protein, mRNA [NM_001011893]                                            | 8,140 |
| Bpnt1      | Rattus norvegicus 3'(2'), 5'-bisphosphate nucleotidase 1 (Bpnt1), mRNA [NM_171990]                                                              | 8,140 |
| Cast       | Rattus norvegicus calpastatin (Cast), transcript variant 1, mRNA [NM_053295]                                                                    | 8,138 |
| Wdr77      | Rattus norvegicus WD repeat domain 77 (Wdr77), mRNA [NM_001008771]                                                                              | 8,138 |
| Prim1      | Rattus norvegicus DNA primase, p49 subunit (Prim1), mRNA [NM_001008768]                                                                         | 8,137 |
| 0          | Unknown                                                                                                                                         | 8,137 |
| Eml4       | Rattus norvegicus echinoderm microtubule associated protein like 4 (Eml4), mRNA [NM_001108008]                                                  | 8,135 |
| LOC688420  | PREDICTED: Rattus norvegicus similar to claudin 4 (LOC688420), mRNA [XM_001066865]                                                              | 8,133 |
| Afaf       | Rattus norvegicus Acrosome formation associated factor (Afaf), mRNA [NM_001039345]                                                              | 8,132 |
| Atp4a      | Rattus norvegicus ATPase, H <sup>+</sup> /K <sup>+</sup> exchanging, alpha polypeptide (Atp4a), mRNA [NM_012509]                                | 8,131 |
| RGD1359108 | Rattus norvegicus similar to RIKEN cDNA 3110043O21 (RGD1359108), mRNA [NM_001007702]                                                            | 8,130 |
| Btbd10     | Rattus norvegicus BTB (POZ) domain containing 10 (Btbd10), mRNA [NM_001014022]                                                                  | 8,126 |
| MGC116121  | Rattus norvegicus similar to RIKEN cDNA 2700062C07 (MGC116121), mRNA [NM_001024905]                                                             | 8,124 |
| Fscn3      | Rattus norvegicus fascin homolog 3, actin-bundling protein, testicular (Strongylocentrotus purpuratus) (Fscn3), mRNA [NM_001004232]             | 8,124 |
| Npl        | Rattus norvegicus N-acetylneuraminate pyruvate lyase (Npl), mRNA [NM_001013984]                                                                 | 8,123 |
| Ears2      | Rattus norvegicus glutamyl-tRNA synthetase 2 mitochondrial (putative) (Ears2), nuclear gene encoding mitochondrial protein, mRNA [NM_001159493] | 8,123 |
| 0          | Unknown                                                                                                                                         | 8,123 |
| 0          | Unknown                                                                                                                                         | 8,121 |
| Prmt2      | Rattus norvegicus protein arginine methyltransferase 2 (Prmt2), mRNA [NM_001025144]                                                             | 8,121 |

|            |                                                                                                                         |       |
|------------|-------------------------------------------------------------------------------------------------------------------------|-------|
| Olr63      | Rattus norvegicus olfactory receptor 63 (Olr63), mRNA [NM_001000542]                                                    | 8,119 |
| Znf655     | Rattus norvegicus zinc finger protein 655 (Znf655), mRNA [NM_001008362]                                                 | 8,119 |
| 0          | Unknown                                                                                                                 | 8,118 |
| Olr1319    | Rattus norvegicus olfactory receptor 1319 (Olr1319), mRNA [NM_001000470]                                                | 8,118 |
| Uhrf2      | Rattus norvegicus ubiquitin-like with PHD and ring finger domains 2 (Uhrf2), mRNA [NM_001107585]                        | 8,118 |
| Nap114     | Rattus norvegicus nucleosome assembly protein 1-like 4 (Nap114), mRNA [NM_001012170]                                    | 8,118 |
| Camsap111  | Rattus norvegicus calmodulin regulated spectrin-associated protein 1-like 1 (Camsap111), mRNA [NM_001134503]            | 8,115 |
| Btbd3      | Rattus norvegicus BTB (POZ) domain containing 3 (Btbd3), mRNA [NM_001107782]                                            | 8,114 |
| Slc22a13   | Rattus norvegicus solute carrier family 22 (organic anion transporter), member 13 (Slc22a13), mRNA [NM_001126285]       | 8,113 |
| Ndr4       | Rattus norvegicus N-myc downstream regulated gene 4 (Ndr4), mRNA [NM_031967]                                            | 8,113 |
| Ahr        | Rattus norvegicus aryl hydrocarbon receptor (Ahr), mRNA [NM_013149]                                                     | 8,113 |
| RGD1564964 | Rattus norvegicus similar to WD repeat domain 11 protein (RGD1564964), mRNA [NM_001134564]                              | 8,112 |
| 0          | Unknown                                                                                                                 | 8,111 |
| Fmr1       | Rattus norvegicus fragile X mental retardation 1 (Fmr1), mRNA [NM_052804]                                               | 8,107 |
| Fam59b     | Rattus norvegicus family with sequence similarity 59, member B (Fam59b), mRNA [NM_001191874]                            | 8,106 |
| Ncoa7      | Uncharacterized protein [Source:UniProtKB/TrEMBL;Acc:D3ZM65] [ENSRNOT00000018849]                                       | 8,104 |
| Ptprr      | Rattus norvegicus protein tyrosine phosphatase, receptor type, R (Ptprr), transcript variant 1, mRNA [NM_053594]        | 8,102 |
| Bcat1      | Rattus norvegicus branched chain aminotransferase 1, cytosolic (Bcat1), mRNA [NM_017253]                                | 8,101 |
| Pxmp3      | Rattus norvegicus peroxisomal membrane protein 3 (Pxmp3), mRNA [NM_017234]                                              | 8,101 |
| LOC679566  | Rattus norvegicus hypothetical protein LOC679566 (LOC679566), mRNA [NM_001109372]                                       | 8,101 |
| Galns      | Rattus norvegicus galactosamine (N-acetyl)-6-sulfate sulfatase (Galns), mRNA [NM_001047851]                             | 8,100 |
| Ptges3l1   | Rattus norvegicus prostaglandin E synthase 3-like 1 (Ptges3l1), mRNA [NM_001014272]                                     | 8,100 |
| Adora2b    | Rattus norvegicus adenosine A2B receptor (Adora2b), mRNA [NM_017161]                                                    | 8,099 |
| Poll       | Rattus norvegicus polymerase (DNA directed), lambda (Poll), mRNA [NM_001014168]                                         | 8,098 |
| Slc5a3     | Rattus norvegicus solute carrier family 5 (sodium/myo-inositol cotransporter), member 3 (Slc5a3), mRNA [NM_053715]      | 8,098 |
| Myh13      | Myosin heavy chain [Source:UniProtKB/TrEMBL;Acc:Q9Z2B7] [ENSRNOT00000055257]                                            | 8,098 |
| Mfsd6      | Rattus norvegicus major facilitator superfamily domain containing 6 (Mfsd6), mRNA [NM_001106911]                        | 8,097 |
| Znf839     | PREDICTED: Rattus norvegicus zinc finger protein 839 (Znf839), mRNA [XM_001071353]                                      | 8,097 |
| Prex1      | Rattus norvegicus phosphatidylinositol-3,4,5-trisphosphate-dependent Rac exchange factor 1 (Prex1), mRNA [NM_001135718] | 8,096 |
| Mtm1       | Rattus norvegicus myotubularin 1 (Mtm1), mRNA [NM_001013047]                                                            | 8,096 |
| 0          | Glyceraldehyde-3-phosphate dehydrogenase [Source:UniProtKB/TrEMBL;Acc:D3ZT40] [ENSRNOT00000041811]                      | 8,096 |
| 0          | Unknown                                                                                                                 | 8,096 |
| LOC302680  | similar to CXORF15 (LOC302680), mRNA [Source:RefSeq DNA;Acc:NM_001037187] [ENSRNOT00000006843]                          | 8,095 |
| Tbc1d19    | Rattus norvegicus TBC1 domain family, member 19 (Tbc1d19), mRNA [NM_001106008]                                          | 8,095 |

|            |                                                                                                                             |       |
|------------|-----------------------------------------------------------------------------------------------------------------------------|-------|
| 0          | Q5SZT6_MOUSE (Q5SZT6) OTTMUSP00000000447, partial (4%) [TC640179]                                                           | 8,093 |
| Pigl       | Rattus norvegicus phosphatidylinositol glycan anchor biosynthesis, class L (Pigl), mRNA [NM_138901]                         | 8,090 |
| Rnf123     | Rattus norvegicus ring finger protein 123 (Rnf123), mRNA [NM_001191580]                                                     | 8,090 |
| Xrcc1      | Rattus norvegicus X-ray repair complementing defective repair in Chinese hamster cells 1 (Xrcc1), mRNA [NM_053435]          | 8,090 |
| Stx5       | Rattus norvegicus syntaxin 5 (Stx5), mRNA [NM_031704]                                                                       | 8,090 |
| Olr806     | Rattus norvegicus olfactory receptor 806 (Olr806), mRNA [NM_001000976]                                                      | 8,089 |
| Camsap1    | Rattus norvegicus calmodulin regulated spectrin-associated protein 1 (Camsap1), mRNA [NM_001168549]                         | 8,089 |
| Vps36      | Rattus norvegicus vacuolar protein sorting 36 homolog (S. cerevisiae) (Vps36), mRNA [NM_001106092]                          | 8,086 |
| Tst        | Rattus norvegicus thiosulfate sulfurtransferase (Tst), nuclear gene encoding mitochondrial protein, mRNA [NM_012808]        | 8,086 |
| Cpeb1      | Rattus norvegicus cytoplasmic polyadenylation element binding protein 1 (Cpeb1), mRNA [NM_001106276]                        | 8,086 |
| LOC498829  | PREDICTED: Rattus norvegicus Ab2-143 (LOC498829), miscRNA [XR_005439]                                                       | 8,085 |
| Grin2c     | Rattus norvegicus glutamate receptor, ionotropic, N-methyl D-aspartate 2C (Grin2c), mRNA [NM_012575]                        | 8,084 |
| 0          | Unknown                                                                                                                     | 8,082 |
| Tdrd12     | PREDICTED: Rattus norvegicus similar to CG11133-PA (LOC689639), mRNA [XM_001071461]                                         | 8,081 |
| Tk2        | Rattus norvegicus thymidine kinase 2, mitochondrial (Tk2), nuclear gene encoding mitochondrial protein, mRNA [NM_001106166] | 8,080 |
| 0          | Unknown                                                                                                                     | 8,080 |
| Srp72      | Rattus norvegicus signal recognition particle 72 (Srp72), mRNA [NM_001170601]                                               | 8,078 |
| Zcchc17    | Rattus norvegicus zinc finger, CCHC domain containing 17 (Zcchc17), mRNA [NM_001109267]                                     | 8,078 |
| Olr834     | Rattus norvegicus olfactory receptor 834 (Olr834), mRNA [NM_001000407]                                                      | 8,077 |
| 0          | Dedicator of cytokinesis 5 (Predicted)Uncharacterized protein [Source:UniProtKB/TrEMBL;Acc:D3ZYS9] [ENSRNOT00000058887]     | 8,077 |
| Dppa2      | PREDICTED: Rattus norvegicus similar to developmental pluripotency-associated 2 (LOC685364), mRNA [XM_001063497]            | 8,076 |
| RT1-A1     | Rattus norvegicus RT1 class Ia, locus A1 (RT1-A1), mRNA [NM_001008827]                                                      | 8,076 |
| 0          | Unknown                                                                                                                     | 8,074 |
| 0          | Uncharacterized protein [Source:UniProtKB/TrEMBL;Acc:D3ZRC6] [ENSRNOT00000050943]                                           | 8,073 |
| RGD1564915 | PREDICTED: Rattus norvegicus similar to TDPOZ2 (RGD1564915), mRNA [XM_578033]                                               | 8,072 |
| Lsm11      | Rattus norvegicus LSM11, U7 small nuclear RNA associated (Lsm11), mRNA [NM_001173384]                                       | 8,070 |
| Sox2       | Rattus norvegicus SRY (sex determining region Y)-box 2 (Sox2), mRNA [NM_001109181]                                          | 8,066 |
| 0          | Unknown                                                                                                                     | 8,066 |
| 0          | AGENCOURT_27827201 NIH_MGC_252 Rattus norvegicus cDNA clone IMAGE:7307928 5', mRNA sequence [CO396750]                      | 8,063 |
| Sel1l      | Rattus norvegicus sel-1 suppressor of lin-12-like (C. elegans) (Sel1l), mRNA [NM_177933]                                    | 8,062 |
| Mtf2       | Rattus norvegicus metal response element binding transcription factor 2 (Mtf2), mRNA [NM_001100898]                         | 8,061 |
| Sned1      | Rattus norvegicus sushi, nidogen and EGF-like domains 1 (Sned1), mRNA [NM_001167842]                                        | 8,061 |
| Tpd52l2    | Rattus norvegicus tumor protein D52-like 2 (Tpd52l2), mRNA [NM_198744]                                                      | 8,060 |
| Klhl21     | Rattus norvegicus kelch-like 21 (Drosophila) (Klhl21), mRNA [NM_001107996]                                                  | 8,059 |

|         |                                                                                                                                                 |              |
|---------|-------------------------------------------------------------------------------------------------------------------------------------------------|--------------|
| Pigw    | Rattus norvegicus phosphatidylinositol glycan anchor biosynthesis, class W (Pigw), mRNA [NM_194461]                                             | <b>8,058</b> |
| 0       | Unknown                                                                                                                                         | <b>8,057</b> |
| Unc79   | Uncharacterized protein [Source:UniProtKB/TrEMBL;Acc:D3ZSV8] [ENSRNOT00000066306]                                                               | <b>8,057</b> |
| Fen1    | Rattus norvegicus flap structure-specific endonuclease 1 (Fen1), mRNA [NM_053430]                                                               | <b>8,057</b> |
| 0       | Unknown                                                                                                                                         | <b>8,057</b> |
| Zfp64   | Rattus norvegicus zinc finger protein 64 (Zfp64), mRNA [NM_001012093]                                                                           | <b>8,055</b> |
| 0       | PREDICTED: Rattus norvegicus similar to eyes absent 4 isoform a (LOC360684), partial mRNA [XM_340956]                                           | <b>8,055</b> |
| Rapgef6 | Rattus norvegicus Rap guanine nucleotide exchange factor (GEF) 6 (Rapgef6), mRNA [NM_001107003]                                                 | <b>8,054</b> |
| Fam122b | Rattus norvegicus family with sequence similarity 122B (Fam122b), mRNA [NM_001166586]                                                           | <b>8,053</b> |
| Zfp1    | PREDICTED: Rattus norvegicus zinc finger protein 1 (Zfp1), mRNA [XM_001077676]                                                                  | <b>8,053</b> |
| Top2a   | Rattus norvegicus topoisomerase (DNA) II alpha (Top2a), mRNA [NM_022183]                                                                        | <b>8,052</b> |
| Rfng    | Rattus norvegicus RFNG O-fucosylpeptide 3-beta-N-acetylglucosaminyltransferase (Rfng), mRNA [NM_021849]                                         | <b>8,051</b> |
| 0       | Unknown                                                                                                                                         | <b>8,051</b> |
| 0       | Unknown                                                                                                                                         | <b>8,051</b> |
| 0       | Ig gamma-2A chain C region [Source:UniProtKB/Swiss-Prot;Acc:P20760] [ENSRNOT00000066209]                                                        | <b>8,050</b> |
| Metrn   | Rattus norvegicus meteorin, glial cell differentiation regulator (Metrn), mRNA [NM_001009962]                                                   | <b>8,048</b> |
| Rbbp4   | Rattus norvegicus retinoblastoma binding protein 4 (Rbbp4), mRNA [NM_001107912]                                                                 | <b>8,047</b> |
| Zfyve19 | Rattus norvegicus zinc finger, FYVE domain containing 19 (Zfyve19), mRNA [NM_001034948]                                                         | <b>8,046</b> |
| Vegfc   | Rattus norvegicus vascular endothelial growth factor C (Vegfc), mRNA [NM_053653]                                                                | <b>8,046</b> |
| Kpna5   | Rattus norvegicus karyopherin alpha 5 (importin alpha 6) (Kpna5), mRNA [NM_001025113]                                                           | <b>8,045</b> |
| Flrt3   | Rattus norvegicus fibronectin leucine rich transmembrane protein 3 (Flrt3), mRNA [NM_001126291]                                                 | <b>8,044</b> |
| Zdhhc21 | Rattus norvegicus zinc finger, DHHC-type containing 21 (Zdhhc21), mRNA [NM_001039009]                                                           | <b>8,042</b> |
| Bcat2   | Branched-chain-amino-acid aminotransferase, mitochondrial [Source:UniProtKB/Swiss-Prot;Acc:O35854] [ENSRNOT00000028474]                         | <b>8,040</b> |
| 0       | Unknown                                                                                                                                         | <b>8,040</b> |
| 0       | Unknown                                                                                                                                         | <b>8,040</b> |
| Adcy2   | Rattus norvegicus adenylate cyclase 2 (brain) (Adcy2), mRNA [NM_031007]                                                                         | <b>8,039</b> |
| Uso1    | Rattus norvegicus USO1 homolog, vesicle docking protein (yeast) (Uso1), mRNA [NM_019379]                                                        | <b>8,038</b> |
| 0       | Unknown                                                                                                                                         | <b>8,037</b> |
| 0       | Unknown                                                                                                                                         | <b>8,035</b> |
| Gcsh    | Rattus norvegicus glycine cleavage system protein H (aminomethyl carrier) (Gcsh), nuclear gene encoding mitochondrial protein, mRNA [NM_133598] | <b>8,034</b> |
| 0       | Unknown                                                                                                                                         | <b>8,033</b> |
| 0       | Unknown                                                                                                                                         | <b>8,030</b> |
| 0       | Unknown                                                                                                                                         | <b>8,030</b> |

|           |                                                                                                                                                                                                             |       |
|-----------|-------------------------------------------------------------------------------------------------------------------------------------------------------------------------------------------------------------|-------|
| Prps1     | Rattus norvegicus phosphoribosyl pyrophosphate synthetase 1 (Prps1), mRNA [NM_017243]                                                                                                                       | 8,029 |
| LOC687565 | Rattus norvegicus similar to density-regulated protein (LOC687565), mRNA [NM_001115046]                                                                                                                     | 8,029 |
| Disp1     | Rattus norvegicus dispatched homolog 1 (Drosophila) (Disp1), mRNA [NM_001105983]                                                                                                                            | 8,028 |
| Fgfr3     | Rattus norvegicus fibroblast growth factor receptor 3 (Fgfr3), mRNA [NM_053429]                                                                                                                             | 8,025 |
| LOC363337 | Rattus norvegicus similar to RIKEN cDNA 1700081O22 (LOC363337), mRNA [NM_001014221]                                                                                                                         | 8,024 |
| Zfp786    | Rattus norvegicus zinc finger protein 786 (Zfp786), mRNA [NM_001127594]                                                                                                                                     | 8,024 |
| 0         | Uncharacterized protein [Source:UniProtKB/TrEMBL;Acc:D3ZVK0] [ENSRNOT00000009701]                                                                                                                           | 8,023 |
| Kcnk6     | Rattus norvegicus potassium channel, subfamily K, member 6 (Kcnk6), mRNA [NM_053806]                                                                                                                        | 8,022 |
| Wdr25l    | Rattus norvegicus WD repeat domain 25-like (Wdr25l), mRNA [NM_001135894]                                                                                                                                    | 8,021 |
| 0         | PREDICTED: Rattus norvegicus similar to glyceraldehyde-3-phosphate dehydrogenase (phosphorylating) (EC 1.2.1.12) (RGD1564958), mRNA [XM_001066279]                                                          | 8,020 |
| Rpl10a    | Rattus norvegicus ribosomal protein L10A (Rpl10a), mRNA [NM_031065]                                                                                                                                         | 8,020 |
| Zfp93     | Rattus norvegicus zinc finger protein 93 (Zfp93), mRNA [NM_001106546]                                                                                                                                       | 8,019 |
| 0         | Unknown                                                                                                                                                                                                     | 8,019 |
| Trpm5     | Rattus norvegicus transient receptor potential cation channel, subfamily M, member 5 (Trpm5), mRNA [NM_001191896]                                                                                           | 8,018 |
| Nrp1      | Rattus norvegicus neuropilin 1 (Nrp1), mRNA [NM_145098]                                                                                                                                                     | 8,018 |
| Tmem74    | Uncharacterized protein [Source:UniProtKB/TrEMBL;Acc:D3ZR33] [ENSRNOT00000006791]                                                                                                                           | 8,018 |
| 0         | Rattus norvegicus TL0ACA48YA23 mRNA sequence. [FQ215489]                                                                                                                                                    | 8,013 |
| Gcn111    | Rattus norvegicus GCN1 general control of amino-acid synthesis 1-like 1 (yeast) (Gcn111), mRNA [NM_001168664]                                                                                               | 8,013 |
| Ncapd3    | Rattus norvegicus non-SMC condensin II complex, subunit D3 (Ncapd3), mRNA [NM_001034000]                                                                                                                    | 8,013 |
| Rpap2     | Rattus norvegicus RNA polymerase II associated protein 2 (Rpap2), mRNA [NM_001013987]                                                                                                                       | 8,010 |
| 0         | PREDICTED: Rattus norvegicus hypothetical gene supported by BC082068 (LOC501476), mRNA [XM_002730162]                                                                                                       | 8,010 |
| LOC683034 | PREDICTED: Rattus norvegicus hypothetical protein LOC683034, transcript variant 2 (LOC683034), mRNA [XM_001061393]                                                                                          | 8,010 |
| 0         | Mannan-binding lectin serine protease 1Mannan-binding lectin serine protease 1 heavy chainMannan-binding lectin serine protease 1 light chain [Source:UniProtKB/Swiss-Prot;Acc:Q8CHN8] [ENSRNOT00000002512] | 8,010 |
| Rapgef4   | Rap guanine nucleotide exchange factor 4 [Source:UniProtKB/Swiss-Prot;Acc:Q9Z1C7] [ENSRNOT00000010630]                                                                                                      | 8,009 |
| Mfn2      | Rattus norvegicus mitofusin 2 (Mfn2), nuclear gene encoding mitochondrial protein, mRNA [NM_130894]                                                                                                         | 8,009 |
| Cbr1      | Rattus norvegicus carbonyl reductase 1 (Cbr1), mRNA [NM_019170]                                                                                                                                             | 8,009 |
| Parp1     | Rattus norvegicus poly (ADP-ribose) polymerase 1 (Parp1), mRNA [NM_013063]                                                                                                                                  | 8,006 |
| Phf20     | Rattus norvegicus PHD finger protein 20 (Phf20), mRNA [NM_001107795]                                                                                                                                        | 8,006 |
| Tubd1     | Rattus norvegicus tubulin, delta 1 (Tubd1), mRNA [NM_001105826]                                                                                                                                             | 8,003 |
| 0         | Unknown                                                                                                                                                                                                     | 8,003 |
| Hs3st3a1  | Rattus norvegicus heparan sulfate (glucosamine) 3-O-sulfotransferase 3A1 (Hs3st3a1), mRNA [NM_001172067]                                                                                                    | 8,003 |
| Lrrn4cl   | Rattus norvegicus LRRN4 C-terminal like (Lrrn4cl), mRNA [NM_001109579]                                                                                                                                      | 8,002 |



|           |                                                                                                                                             |              |
|-----------|---------------------------------------------------------------------------------------------------------------------------------------------|--------------|
| Gpt2      | Rattus norvegicus glutamic pyruvate transaminase (alanine aminotransferase) 2 (Gpt2), mRNA [NM_001012057]                                   | <b>8,001</b> |
| Myo5b     | Rattus norvegicus myosin Vb (Myo5b), mRNA [NM_017083]                                                                                       | <b>8,001</b> |
| Sumf2     | Rattus norvegicus sulfatase modifying factor 2 (Sumf2), mRNA [NM_001025125]                                                                 | <b>8,000</b> |
| Scara5    | Rattus norvegicus scavenger receptor class A, member 5 (putative) (Scara5), mRNA [NM_001135855]                                             | <b>8,000</b> |
| Habp4     | Rattus norvegicus hyaluronan binding protein 4 (Habp4), mRNA [NM_001079940]                                                                 | <b>7,998</b> |
| 0         | similar to RIKEN cDNA 1700001E04 (MGC116197), mRNA [Source:RefSeq DNA;Acc:NM_001025755] [ENSRNOT00000043269]                                | <b>7,998</b> |
| Usp13     | Rattus norvegicus ubiquitin specific protease 13 (isopeptidase T-3) (Usp13), mRNA [NM_001107665]                                            | <b>7,997</b> |
| 0         | P90550_LEIDO (P90550) 39 kDa antigen, partial (5%) [TC612167]                                                                               | <b>7,997</b> |
| LOC688387 | PREDICTED: Rattus norvegicus hypothetical protein LOC688387 (LOC688387), mRNA [XM_001066721]                                                | <b>7,995</b> |
| LOC363337 | Rattus norvegicus similar to RIKEN cDNA 1700081O22 (LOC363337), mRNA [NM_001014221]                                                         | <b>7,995</b> |
| LOC688463 | PREDICTED: Rattus norvegicus hypothetical protein LOC688463 (LOC688463), mRNA [XM_001064240]                                                | <b>7,994</b> |
| Pamr1     | Rattus norvegicus peptidase domain containing associated with muscle regeneration 1 (Pamr1), mRNA [NM_001107755]                            | <b>7,994</b> |
| B9d1      | Rattus norvegicus B9 protein domain 1 (B9d1), mRNA [NM_001105786]                                                                           | <b>7,993</b> |
| Jak2      | Rattus norvegicus Janus kinase 2 (Jak2), mRNA [NM_031514]                                                                                   | <b>7,993</b> |
| Myt1l     | Rattus norvegicus myelin transcription factor 1-like (Myt1l), mRNA [NM_053888]                                                              | <b>7,991</b> |
| 0         | Rattus norvegicus similar to zinc finger protein 91 (HPF7, HTF10) (LOC308338), mRNA [XM_218198]                                             | <b>7,991</b> |
| Ccdc85a   | Rattus norvegicus coiled-coil domain containing 85A (Ccdc85a), mRNA [NM_001191553]                                                          | <b>7,991</b> |
| 0         | Unknown                                                                                                                                     | <b>7,991</b> |
| Baiap2l2  | Uncharacterized protein [Source:UniProtKB/TrEMBL;Acc:D4A901] [ENSRNOT00000016362]                                                           | <b>7,988</b> |
| Sptbn4    | Sptbn4 protein [Source:UniProtKB/TrEMBL;Acc:Q5BJU8] [ENSRNOT00000028393]                                                                    | <b>7,986</b> |
| Acyp2     | Rattus norvegicus acylphosphatase 2, muscle type (Acyp2), mRNA [NM_001169145]                                                               | <b>7,985</b> |
| Spg7      | Rattus norvegicus spastic paraplegia 7 homolog (human) (Spg7), nuclear gene encoding mitochondrial protein, mRNA [NM_181388]                | <b>7,985</b> |
| 0         | Unknown                                                                                                                                     | <b>7,983</b> |
| Pkn2      | Rattus norvegicus protein kinase N2 (Pkn2), mRNA [NM_001105755]                                                                             | <b>7,983</b> |
| Ipo5      | Uncharacterized protein [Source:UniProtKB/TrEMBL;Acc:D4A781] [ENSRNOT00000014859]                                                           | <b>7,983</b> |
| Zbtb8a    | Rattus norvegicus zinc finger and BTB domain containing 8a (Zbtb8a), mRNA [NM_001107913]                                                    | <b>7,979</b> |
| Harbi1    | Rattus norvegicus harbinger transposase derived 1 (Harbi1), mRNA [NM_001113793]                                                             | <b>7,979</b> |
| Camkk2    | Rattus norvegicus calcium/calmodulin-dependent protein kinase kinase 2, beta (Camkk2), mRNA [NM_031338]                                     | <b>7,977</b> |
| Nptn      | Rattus norvegicus neuroplastin (Nptn), mRNA [NM_019380]                                                                                     | <b>7,977</b> |
| Lrrc25    | Rattus norvegicus TL0ADA9YE12 mRNA sequence. [FQ228377]                                                                                     | <b>7,977</b> |
| Nudcd2    | Rattus norvegicus NudC domain containing 2 (Nudcd2), mRNA [NM_001009621]                                                                    | <b>7,974</b> |
| Rnf215    | Rattus norvegicus ring finger protein 215 (Rnf215), mRNA [NM_001107234]                                                                     | <b>7,969</b> |
| 0         | Rattus norvegicus similar to glyceraldehyde-3-phosphate dehydrogenase (phosphorylating) (EC 1.2.1.12) - mouse (LOC303889), mRNA [XM_221419] | <b>7,969</b> |

|              |                                                                                                                                      |       |
|--------------|--------------------------------------------------------------------------------------------------------------------------------------|-------|
| LOC100360662 | PREDICTED: Rattus norvegicus thioredoxin-like 4-like (LOC100360662), mRNA [XM_002729753]                                             | 7,969 |
| Lace1        | Rattus norvegicus lactation elevated 1 (Lace1), mRNA [NM_001037656]                                                                  | 7,968 |
| Pigg         | PREDICTED: Rattus norvegicus phosphatidylinositol glycan anchor biosynthesis, class G, transcript variant 3 (Pigg), mRNA [XM_223731] | 7,967 |
| Fv1          | Rattus norvegicus Friend virus susceptibility 1 (Fv1), mRNA [NM_001014018]                                                           | 7,967 |
| Ldoc1l       | Uncharacterized protein [Source:UniProtKB/TrEMBL;Acc:D3ZI44] [ENSRNOT00000039588]                                                    | 7,964 |
| Atoh8        | Rattus norvegicus atonal homolog 8 (Drosophila) (Atoh8), mRNA [NM_001109241]                                                         | 7,963 |
| Hist1h3f     | PREDICTED: Rattus norvegicus histone cluster 1, H3f (Hist1h3f), mRNA [XM_001071516]                                                  | 7,962 |
| Cyb5r2       | Rattus norvegicus cytochrome b5 reductase 2 (Cyb5r2), mRNA [NM_001014244]                                                            | 7,962 |
| Dync1li2     | Rattus norvegicus dynein, cytoplasmic 1 light intermediate chain 2 (Dync1li2), mRNA [NM_031026]                                      | 7,962 |
| 0            | Unknown                                                                                                                              | 7,961 |
| 0            | Unknown                                                                                                                              | 7,960 |
| Lias         | Rattus norvegicus lipoic acid synthetase (Lias), nuclear gene encoding mitochondrial protein, mRNA [NM_001012037]                    | 7,959 |
| 0            | Unknown                                                                                                                              | 7,959 |
| 0            | Unknown                                                                                                                              | 7,958 |
| 0            | ORML3_RAT (Q6QI25) ORM1-like protein 3 (Liver regeneration-related protein LRRGT00183), complete [TC597420]                          | 7,956 |
| Srbd1        | Uncharacterized protein [Source:UniProtKB/TrEMBL;Acc:D4A9B0] [ENSRNOT00000019894]                                                    | 7,955 |
| Olr259       | Rattus norvegicus olfactory receptor 259 (Olr259), mRNA [NM_001000222]                                                               | 7,955 |
| 0            | Unknown                                                                                                                              | 7,954 |
| 0            | Unknown                                                                                                                              | 7,952 |
| Hsf2         | Rattus norvegicus heat shock transcription factor 2 (Hsf2), mRNA [NM_031694]                                                         | 7,951 |
| Atp6v0e1     | Rattus norvegicus ATPase, H <sup>+</sup> transporting, lysosomal, V0 subunit e1 (Atp6v0e1), mRNA [NM_053578]                         | 7,951 |
| Hlx          | Rattus norvegicus H2.0-like homeobox (Hlx), mRNA [NM_001077674]                                                                      | 7,951 |
| Gys1         | Rattus norvegicus glycogen synthase 1, muscle (Gys1), mRNA [NM_001109615]                                                            | 7,950 |
| Ccny         | Rattus norvegicus cyclin Y (Ccny), mRNA [NM_001191833]                                                                               | 7,946 |
| R3hcc1       | PREDICTED: Rattus norvegicus R3H domain and coiled-coil containing 1 (R3hcc1), mRNA [XM_001069252]                                   | 7,942 |
| Fgf1         | Rattus norvegicus fibroblast growth factor 1 (Fgf1), mRNA [NM_012846]                                                                | 7,942 |
| LOC100365858 | PREDICTED: Rattus norvegicus zinc finger CCCH type, antiviral 1-like (LOC100365858), miscRNA [XR_085680]                             | 7,941 |
| 0            | Uncharacterized protein [Source:UniProtKB/TrEMBL;Acc:D3ZLM0] [ENSRNOT00000044997]                                                    | 7,940 |
| RGD1563547   | Rattus norvegicus RGD1563547 (RGD1563547), mRNA [NM_001108266]                                                                       | 7,940 |
| Hnrnpk       | Rattus norvegicus heterogeneous nuclear ribonucleoprotein K (Hnrnpk), mRNA [NM_057141]                                               | 7,940 |
| Bicd2        | Rattus norvegicus bicaudal D homolog 2 (Drosophila) (Bicd2), transcript variant 1, mRNA [NM_001033674]                               | 7,939 |
| Olr1531      | Rattus norvegicus olfactory receptor 1531 (Olr1531), mRNA [NM_001001102]                                                             | 7,937 |
| 0            | Unknown                                                                                                                              | 7,937 |
| 0            | Unknown                                                                                                                              | 7,936 |

|            |                                                                                                                                             |       |
|------------|---------------------------------------------------------------------------------------------------------------------------------------------|-------|
| Nav3       | Rattus norvegicus neuron navigator 3 (Nav3), mRNA [NM_001191782]                                                                            | 7,935 |
| Mllt4      | Rattus norvegicus myeloid/lymphoid or mixed-lineage leukemia (trithorax homolog, Drosophila); translocated to, 4 (Mllt4), mRNA [NM_013217]  | 7,935 |
| Rrn3       | Rattus norvegicus RRN3 RNA polymerase I transcription factor homolog (S. cerevisiae) (Rrn3), mRNA [NM_001135846]                            | 7,935 |
| Cenpc1     | Rattus norvegicus centromere protein C 1 (Cenpc1), mRNA [NM_001004098]                                                                      | 7,934 |
| 0          | Unknown                                                                                                                                     | 7,934 |
| Xcl1       | Rattus norvegicus chemokine (C motif) ligand 1 (Xcl1), mRNA [NM_134361]                                                                     | 7,933 |
| Spin1      | Rattus norvegicus spindlin 1 (Spin1), mRNA [NM_001024796]                                                                                   | 7,933 |
| Hmg111     | Rattus norvegicus high-mobility group (nonhistone chromosomal) protein 1-like 1 (Hmg111), mRNA [NM_001109373]                               | 7,931 |
| Bbc3       | Rattus norvegicus Bcl-2 binding component 3 (Bbc3), mRNA [NM_173837]                                                                        | 7,931 |
| Ezr        | Rattus norvegicus ezrin (Ezr), mRNA [NM_019357]                                                                                             | 7,931 |
| Fitm1      | Rattus norvegicus fat storage-inducing transmembrane protein 1 (Fitm1), mRNA [NM_001106037]                                                 | 7,931 |
| 0          | Rattus norvegicus similar to glyceraldehyde-3-phosphate dehydrogenase (phosphorylating) (EC 1.2.1.12) - mouse (LOC294844), mRNA [XM_226873] | 7,930 |
| 0          | Rattus norvegicus clone PLRR-14 polymorphic leucine-rich repeat protein mRNA, partial cds. [AF406815]                                       | 7,930 |
| Nr1h2      | Rattus norvegicus nuclear receptor subfamily 1, group H, member 2 (Nr1h2), mRNA [NM_031626]                                                 | 7,930 |
| Uck2       | Rattus norvegicus uridine-cytidine kinase 2 (Uck2), mRNA [NM_001102408]                                                                     | 7,928 |
| Epha6      | Ephrin type-A receptor 6 [Source:UniProtKB/Swiss-Prot;Acc:P54758] [ENSRNOT00000047310]                                                      | 7,927 |
| Adcyap1    | Rattus norvegicus adenylate cyclase activating polypeptide 1 (Adcyap1), mRNA [NM_016989]                                                    | 7,927 |
| Olr1366    | Rattus norvegicus olfactory receptor 1366 (Olr1366), mRNA [NM_001000980]                                                                    | 7,926 |
| 0          | Q63ZX6_MOUSE (Q63ZX6) Phf2011 protein (Fragment), partial (4%) [TC630334]                                                                   | 7,926 |
| Fxr2       | Rattus norvegicus fragile X mental retardation, autosomal homolog 2 (Fxr2), mRNA [NM_001100647]                                             | 7,926 |
| RGD1307461 | Rattus norvegicus similar to RIKEN cDNA 6430571L13 gene; similar to g20 protein (RGD1307461), mRNA [NM_001106854]                           | 7,924 |
| Pnma1      | Rattus norvegicus paraneoplastic antigen MA1 (Pnma1), mRNA [NM_130820]                                                                      | 7,923 |
| Zfyve9     | Rattus norvegicus zinc finger, FYVE domain containing 9 (Zfyve9), mRNA [NM_001107952]                                                       | 7,923 |
| 0          | Uncharacterized protein [Source:UniProtKB/TrEMBL;Acc:D3ZFR8] [ENSRNOT00000036063]                                                           | 7,923 |
| Tcrb       | AGENCOURT_28622268 NIH_MGC_250 Rattus norvegicus cDNA clone IMAGE:7384586 5', mRNA sequence [CO562512]                                      | 7,920 |
| 0          | Rattus norvegicus similar to Dcra (LOC360703), mRNA [XM_340974]                                                                             | 7,919 |
| Efcab1     | Rattus norvegicus EF hand calcium binding domain 1 (Efcab1), mRNA [NM_001106930]                                                            | 7,919 |
| Sms        | Rattus norvegicus spermine synthase (Sms), mRNA [NM_001033899]                                                                              | 7,919 |
| Pik3ca     | Rattus norvegicus phosphoinositide-3-kinase, catalytic, alpha polypeptide (Pik3ca), mRNA [NM_133399]                                        | 7,918 |
| Acrbp      | Rattus norvegicus acrosin binding protein (Acrbp), mRNA [NM_001025049]                                                                      | 7,918 |
| Arhgef19   | Rattus norvegicus Rho guanine nucleotide exchange factor (GEF) 19 (Arhgef19), mRNA [NM_001108692]                                           | 7,917 |
| Pcgf1      | Rattus norvegicus polycomb group ring finger 1 (Pcgf1), mRNA [NM_001007000]                                                                 | 7,913 |
| Plag1      | Rattus norvegicus pleiomorphic adenoma gene 1 (Plag1), mRNA [NM_001008316]                                                                  | 7,913 |

|            |                                                                                                                                                    |              |
|------------|----------------------------------------------------------------------------------------------------------------------------------------------------|--------------|
| Tmeff1     | Rattus norvegicus transmembrane protein with EGF-like and two follistatin-like domains 1 (Tmeff1), mRNA [NM_023020]                                | <b>7,913</b> |
| 0          | PREDICTED: Rattus norvegicus similar to glyceraldehyde-3-phosphate dehydrogenase (phosphorylating) (EC 1.2.1.12) (RGD1561881), mRNA [XM_001078200] | <b>7,909</b> |
| 0          | Unknown                                                                                                                                            | <b>7,909</b> |
| Gdap111    | Rattus norvegicus ganglioside-induced differentiation-associated protein 1-like 1 (Gdap111), mRNA [NM_001107798]                                   | <b>7,908</b> |
| Brwd3      | Uncharacterized protein [Source:UniProtKB/TrEMBL;Acc:D3Z8C5] [ENSRNOT00000050336]                                                                  | <b>7,908</b> |
| Hrh1       | Rattus norvegicus histamine receptor H 1 (Hrh1), mRNA [NM_017018]                                                                                  | <b>7,907</b> |
| Zkscan3    | Rattus norvegicus zinc finger with KRAB and SCAN domains 3 (Zkscan3), mRNA [NM_001012053]                                                          | <b>7,907</b> |
| Got1       | Rattus norvegicus glutamic-oxaloacetic transaminase 1, soluble (aspartate aminotransferase 1) (Got1), mRNA [NM_012571]                             | <b>7,906</b> |
| Armc7      | Rattus norvegicus armadillo repeat containing 7 (Armc7), mRNA [NM_001127522]                                                                       | <b>7,906</b> |
| 0          | Unknown                                                                                                                                            | <b>7,906</b> |
| Mum111     | Rattus norvegicus melanoma associated antigen (mutated) 1-like 1 (Mum111), mRNA [NM_001109321]                                                     | <b>7,906</b> |
| Bag4       | Rattus norvegicus BCL2-associated athanogene 4 (Bag4), mRNA [NM_001025130]                                                                         | <b>7,903</b> |
| 0          | Unknown                                                                                                                                            | <b>7,903</b> |
| RGD1311357 | PREDICTED: Rattus norvegicus similar to A530083I02Rik protein (RGD1311357), mRNA [XM_001070093]                                                    | <b>7,903</b> |
| RGD1564722 | Uncharacterized protein [Source:UniProtKB/TrEMBL;Acc:D4ABT2] [ENSRNOT00000049766]                                                                  | <b>7,902</b> |
| Slc30a3    | Rattus norvegicus solute carrier family 30 (zinc transporter), member 3 (Slc30a3), mRNA [NM_001013243]                                             | <b>7,899</b> |
| Sync       | Rattus norvegicus syncoilin (Sync), mRNA [NM_001108683]                                                                                            | <b>7,899</b> |
| Gle1       | Rattus norvegicus GLE1 RNA export mediator homolog (yeast) (Gle1), mRNA [NM_001025731]                                                             | <b>7,899</b> |
| Calm1      | Rattus norvegicus calmodulin 1 (Calm1), mRNA [NM_031969]                                                                                           | <b>7,898</b> |
| Jdp2       | Rattus norvegicus Jun dimerization protein 2 (Jdp2), mRNA [NM_053894]                                                                              | <b>7,895</b> |
| Eif3j      | Rattus norvegicus eukaryotic translation initiation factor 3, subunit J (Eif3j), mRNA [NM_001077670]                                               | <b>7,894</b> |
| Plcd3      | Rattus norvegicus phospholipase C, delta 3 (Plcd3), mRNA [NM_001105845]                                                                            | <b>7,894</b> |
| Wbp5       | Rattus norvegicus WW domain binding protein 5 (Wbp5), mRNA [NM_001127502]                                                                          | <b>7,894</b> |
| Hps3       | Rattus norvegicus Hermansky-Pudlak syndrome 3 homolog (human) (Hps3), mRNA [NM_001107664]                                                          | <b>7,893</b> |
| RGD1359449 | Rattus norvegicus gasdermin domain containing protein RGD1359449 (RGD1359449), mRNA [NM_001014084]                                                 | <b>7,892</b> |
| 0          | Unknown                                                                                                                                            | <b>7,892</b> |
| Sbds       | Rattus norvegicus Shwachman-Bodian-Diamond syndrome homolog (human) (Sbds), mRNA [NM_001008289]                                                    | <b>7,891</b> |
| 0          | Unknown                                                                                                                                            | <b>7,890</b> |
| LOC378467  | Rattus norvegicus promethin (LOC378467), mRNA [NM_194354]                                                                                          | <b>7,890</b> |
| Triobp     | Uncharacterized protein [Source:UniProtKB/TrEMBL;Acc:D3ZHT2] [ENSRNOT00000067341]                                                                  | <b>7,889</b> |
| Herpud2    | Rattus norvegicus HERPUD family member 2 (Herpud2), mRNA [NM_001024988]                                                                            | <b>7,886</b> |
| Mrgprb4    | Rattus norvegicus MAS-related GPR, member B4 (Mrgprb4), mRNA [NM_001002287]                                                                        | <b>7,886</b> |
| Tpd5211    | Rattus norvegicus tumor protein D52-like 1 (Tpd5211), mRNA [NM_001044295]                                                                          | <b>7,885</b> |

|            |                                                                                                                                                                       |       |
|------------|-----------------------------------------------------------------------------------------------------------------------------------------------------------------------|-------|
| Polr3d     | Rattus norvegicus polymerase (RNA) III (DNA directed) polypeptide D (Polr3d), mRNA [NM_001031653]                                                                     | 7,884 |
| Pcolce     | Rattus norvegicus procollagen C-endopeptidase enhancer (Pcolce), mRNA [NM_019237]                                                                                     | 7,882 |
| Chrn4      | Rattus norvegicus cholinergic receptor, nicotinic, beta 4 (Chrn4), mRNA [NM_052806]                                                                                   | 7,881 |
| 0          | Unknown                                                                                                                                                               | 7,878 |
| Calm2      | Rattus norvegicus calmodulin 2 (Calm2), mRNA [NM_017326]                                                                                                              | 7,878 |
| Wdr89      | Rattus norvegicus WD repeat domain 89 (Wdr89), mRNA [NM_001014078]                                                                                                    | 7,877 |
| Tead1      | Rattus norvegicus TEA domain family member 1 (Tead1), mRNA [NM_001198589]                                                                                             | 7,877 |
| Glyat3     | Rattus norvegicus glycine-N-acyltransferase-like 3 (Glyat3), mRNA [NM_001145062]                                                                                      | 7,876 |
| Stxbp5     | Rattus norvegicus syntaxin binding protein 5 (tomosyn) (Stxbp5), transcript variant b, mRNA [NM_178345]                                                               | 7,876 |
| Cinp       | Rattus norvegicus cyclin-dependent kinase 2-interacting protein (Cinp), mRNA [NM_001106758]                                                                           | 7,875 |
| Abhd5      | Rattus norvegicus abhydrolase domain containing 5 (Abhd5), mRNA [NM_212524]                                                                                           | 7,874 |
| 0          | predicted gene 884 Gene [Source:MGI Symbol;Acc:MGI:2685730] [ENSRNOT00000043156]                                                                                      | 7,873 |
| 0          | Unknown                                                                                                                                                               | 7,872 |
| Ptcd3      | Rattus norvegicus Pentatricopeptide repeat domain 3 (Ptcd3), nuclear gene encoding mitochondrial protein, mRNA [NM_001134718]                                         | 7,872 |
| 0          | RCG22822Uncharacterized protein [Source:UniProtKB/TrEMBL;Acc:D3ZYH3] [ENSRNOT00000048236]                                                                             | 7,872 |
| Ngrn       | Rattus norvegicus neugrin, neurite outgrowth associated (Ngrn), transcript variant 2, mRNA [NM_001033900]                                                             | 7,871 |
| Pex11g     | Rattus norvegicus peroxisomal biogenesis factor 11 gamma (Pex11g), mRNA [NM_001105902]                                                                                | 7,871 |
| Rpp14      | Rattus norvegicus ribonuclease P 14 subunit (human) (Rpp14), transcript variant 1, mRNA [NM_001108372]                                                                | 7,871 |
| RT1-CE4    | Rattus norvegicus RT1 class I, locus CE4 (RT1-CE4), mRNA [NM_001008842]                                                                                               | 7,871 |
| Capn5      | Rattus norvegicus calpain 5 (Capn5), mRNA [NM_134461]                                                                                                                 | 7,871 |
| Cxadr1     | Rattus norvegicus coxsackie virus and adenovirus receptor-like 1 (Cxadr1), mRNA [NM_199406]                                                                           | 7,871 |
| LOC311026  | PREDICTED: Rattus norvegicus similar to mKIAA1461 protein (LOC311026), miscRNA [XR_007266]                                                                            | 7,870 |
| Gpx3       | Rattus norvegicus glutathione peroxidase 3 (Gpx3), mRNA [NM_022525]                                                                                                   | 7,868 |
| Slc25a20   | Rattus norvegicus solute carrier family 25 (carnitine/acylcarnitine translocase), member 20 (Slc25a20), nuclear gene encoding mitochondrial protein, mRNA [NM_053965] | 7,867 |
| Parp2      | Rattus norvegicus poly (ADP-ribose) polymerase 2 (Parp2), mRNA [NM_001106030]                                                                                         | 7,866 |
| Olr53      | Rattus norvegicus olfactory receptor 53 (Olr53), mRNA [NM_001001008]                                                                                                  | 7,865 |
| Ryk        | Rattus norvegicus receptor-like tyrosine kinase (Ryk), mRNA [NM_080402]                                                                                               | 7,864 |
| Ndst3      | Rattus norvegicus N-deacetylase/N-sulfotransferase (heparan glucosaminy) 3 (Ndst3), mRNA [NM_001191716]                                                               | 7,862 |
| 0          | Unknown                                                                                                                                                               | 7,862 |
| 0          | Unknown                                                                                                                                                               | 7,860 |
| 0          | Unknown                                                                                                                                                               | 7,860 |
| Aatk       | Rattus norvegicus apoptosis-associated tyrosine kinase (Aatk), mRNA [NM_001168703]                                                                                    | 7,860 |
| RGD1311072 | Rattus norvegicus similar to 2410001C21Rik protein (RGD1311072), mRNA [NM_001033890]                                                                                  | 7,860 |

|            |                                                                                                                                                                                        |       |
|------------|----------------------------------------------------------------------------------------------------------------------------------------------------------------------------------------|-------|
| Bahd1      | PREDICTED: Rattus norvegicus bromo adjacent homology domain containing 1 (Bahd1), mRNA [XM_347035]                                                                                     | 7,859 |
| Agbl1      | PREDICTED: Rattus norvegicus similar to hypothetical protein D430020F16 (RGD1560280), mRNA [XM_001063833]                                                                              | 7,859 |
| Tmem149    | Rattus norvegicus transmembrane protein 149 (Tmem149), mRNA [NM_001134610]                                                                                                             | 7,859 |
| Fgf11      | Rattus norvegicus fibroblast growth factor 11 (Fgf11), mRNA [NM_130816]                                                                                                                | 7,858 |
| Ehd3       | Rattus norvegicus EH-domain containing 3 (Ehd3), mRNA [NM_138890]                                                                                                                      | 7,855 |
| Ubqln1     | Rattus norvegicus ubiquilin 1 (Ubqln1), mRNA [NM_053747]                                                                                                                               | 7,854 |
| Rbm42      | Rattus norvegicus RNA binding motif protein 42 (Rbm42), mRNA [NM_001014159]                                                                                                            | 7,852 |
| LOC499124  | Rattus norvegicus mouse zinc finger protein 14-like (LOC499124), mRNA [NM_001100991]                                                                                                   | 7,851 |
| Ddhd2      | Uncharacterized protein [Source:UniProtKB/TrEMBL;Acc:D3ZJ91] [ENSRNOT00000020832]                                                                                                      | 7,851 |
| Gl25d1     | Rattus norvegicus glycosyltransferase 25 domain containing 1 (Gl25d1), mRNA [NM_001106067]                                                                                             | 7,849 |
| Sc4mol     | Rattus norvegicus sterol-C4-methyl oxidase-like (Sc4mol), mRNA [NM_080886]                                                                                                             | 7,849 |
| Wdr43      | Rattus norvegicus WD repeat domain 43 (Wdr43), mRNA [NM_001037791]                                                                                                                     | 7,848 |
| Spr        | Rattus norvegicus sepiapterin reductase (7,8-dihydrobiopterin:NADP+ oxidoreductase) (Spr), mRNA [NM_019181]                                                                            | 7,847 |
| Pbrm1      | PREDICTED: Rattus norvegicus polybromo 1, transcript variant 2 (Pbrm1), mRNA [XM_001059164]                                                                                            | 7,847 |
| Thg1l      | Rattus norvegicus tRNA-histidine guanylyltransferase 1-like (S. cerevisiae) (Thg1l), mRNA [NM_001013966]                                                                               | 7,847 |
| Gabrd      | Rattus norvegicus gamma-aminobutyric acid (GABA) A receptor, delta (Gabrd), mRNA [NM_017289]                                                                                           | 7,846 |
| LOC299558  | PREDICTED: Rattus norvegicus similar to Zinc finger protein 44 (Zinc finger protein KOX7) (Gonadotropin-inducible transcription repressor 2) (GIOT-2) (LOC299558), miscRNA [XR_009217] | 7,845 |
| RGD1559750 | PREDICTED: Rattus norvegicus similar to 5-aminoimidazole-4-carboxamide ribonucleotide formyltransferase/IMP cyclohydrolase (RGD1559750), mRNA [XM_227632]                              | 7,845 |
| Trim66     | Rattus norvegicus tripartite motif-containing 66 (Trim66), mRNA [NM_001191839]                                                                                                         | 7,844 |
| Hist3h2bb  | Rattus norvegicus histone cluster 3, H2bb (Hist3h2bb), mRNA [NM_001109641]                                                                                                             | 7,844 |
| Fibcd1     | Rattus norvegicus fibrinogen C domain containing 1 (Fibcd1), mRNA [NM_001107829]                                                                                                       | 7,842 |
| Olr1744    | Rattus norvegicus olfactory receptor 1744 (Olr1744), mRNA [NM_001001426]                                                                                                               | 7,842 |
| Ppil1      | Rattus norvegicus peptidylprolyl isomerase (cyclophilin)-like 1 (Ppil1), mRNA [NM_001034188]                                                                                           | 7,842 |
| LOC686537  | PREDICTED: Rattus norvegicus similar to Carcinoembryonic antigen-related cell adhesion molecule 3 precursor (Carcinoembryonic antigen CGM1) (LOC686537), mRNA [XM_001074635]           | 7,842 |
| 0          | Uncharacterized protein [Source:UniProtKB/TrEMBL;Acc:D3Z9A9] [ENSRNOT00000015727]                                                                                                      | 7,840 |
| 0          | Uncharacterized protein [Source:UniProtKB/TrEMBL;Acc:D3Z881] [ENSRNOT00000012600]                                                                                                      | 7,838 |
| Nudcd2     | Rattus norvegicus NudC domain containing 2 (Nudcd2), mRNA [NM_001009621]                                                                                                               | 7,837 |
| Gpx8       | Rattus norvegicus glutathione peroxidase 8 (Gpx8), mRNA [NM_001106411]                                                                                                                 | 7,837 |
| Hey1       | Rattus norvegicus hairy/enhancer-of-split related with YRPW motif 1 (Hey1), mRNA [NM_001191845]                                                                                        | 7,835 |
| Scg3       | Rattus norvegicus secretogranin III (Scg3), mRNA [NM_053856]                                                                                                                           | 7,835 |
| Ash1l      | Rattus norvegicus ash1 (absent, small, or homeotic)-like (Drosophila) (Ash1l), mRNA [NM_001107689]                                                                                     | 7,834 |

|         |                                                                                                                                  |       |
|---------|----------------------------------------------------------------------------------------------------------------------------------|-------|
| 0       | Unknown                                                                                                                          | 7,833 |
| Ints2   | Rattus norvegicus integrator complex subunit 2, mRNA (cDNA clone MGC:156742 IMAGE:7107619), complete cds. [BC128757]             | 7,833 |
| Rassf5  | Rattus norvegicus Ras association (RalGDS/AF-6) domain family member 5 (Rassf5), mRNA [NM_019365]                                | 7,832 |
| 0       | ribonuclease III, nuclear Gene [Source:MGI Symbol;Acc:MGI:1261425] [ENSRNOT00000048026]                                          | 7,832 |
| 0       | AMGNNUC:SRPG2-00063-G11-A srpg2 (10238) Rattus norvegicus cDNA clone srpg2-00063-g11 5', mRNA sequence [CB547488]                | 7,831 |
| Trmt1   | Rattus norvegicus TRM1 tRNA methyltransferase 1 homolog (S. cerevisiae) (Trmt1), mRNA [NM_001013870]                             | 7,829 |
| Mrpl49  | Rattus norvegicus mitochondrial ribosomal protein L49 (Mrpl49), nuclear gene encoding mitochondrial protein, mRNA [NM_001047883] | 7,829 |
| Pign    | Rattus norvegicus phosphatidylinositol glycan, class N (Pign), mRNA [NM_001100584]                                               | 7,826 |
| Olr1625 | Rattus norvegicus olfactory receptor 1625 (Olr1625), mRNA [NM_001000971]                                                         | 7,826 |
| 0       | RGD1308143 protein [Source:UniProtKB/TrEMBL;Acc:Q5XI45] [ENSRNOT00000056439]                                                     | 7,826 |
| Dip2a   | Rattus norvegicus DIP2 disco-interacting protein 2 homolog A (Drosophila) (Dip2a), mRNA [NM_001191564]                           | 7,825 |
| 0       | Unknown                                                                                                                          | 7,825 |
| Nmral1  | Rattus norvegicus NmrA-like family domain containing 1 (Nmral1), mRNA [NM_001191588]                                             | 7,824 |
| Hdgfrp3 | Rattus norvegicus hepatoma-derived growth factor, related protein 3 (Hdgfrp3), mRNA [NM_145785]                                  | 7,822 |
| 0       | Unknown                                                                                                                          | 7,822 |
| Dicer1  | PREDICTED: Rattus norvegicus dicer 1, ribonuclease type III (Dicer1), mRNA [XM_001068155]                                        | 7,821 |
| Olr1077 | Rattus norvegicus olfactory receptor 1077 (Olr1077), mRNA [NM_001000941]                                                         | 7,821 |
| Scp2    | Rattus norvegicus sterol carrier protein 2 (Scp2), mRNA [NM_138508]                                                              | 7,821 |
| 0       | Uncharacterized protein [Source:UniProtKB/TrEMBL;Acc:D4A391] [ENSRNOT00000066991]                                                | 7,821 |
| Col11a2 | Rattus norvegicus collagen, type XI, alpha 2 (Col11a2), mRNA [NM_212528]                                                         | 7,820 |
| Cd200   | Rattus norvegicus Cd200 molecule (Cd200), mRNA [NM_031518]                                                                       | 7,819 |
| Kank1   | Rattus norvegicus KN motif and ankyrin repeat domains 1 (Kank1), mRNA [NM_001037197]                                             | 7,818 |
| Sfrs18  | Rattus norvegicus splicing factor, arginine/serine-rich 18 (Sfrs18), mRNA [NM_001025274]                                         | 7,816 |
| Camp    | Rattus norvegicus cathelicidin antimicrobial peptide (Camp), mRNA [NM_001100724]                                                 | 7,816 |
| 0       | Unknown                                                                                                                          | 7,816 |
| Adat3   | Rattus norvegicus adenosine deaminase, tRNA-specific 3, TAD3 homolog (S. cerevisiae) (Adat3), mRNA [NM_001103361]                | 7,816 |
| Ctxn2   | Rattus norvegicus cortexin 2 (Ctxn2), mRNA [NM_001162935]                                                                        | 7,816 |
| Plcd1   | Rattus norvegicus phospholipase C, delta 1 (Plcd1), mRNA [NM_017035]                                                             | 7,813 |
| Rcor1   | Rattus norvegicus REST corepressor 1 (Rcor1), mRNA [NM_001108060]                                                                | 7,813 |
| 0       | Unknown                                                                                                                          | 7,812 |
| Fgfr1   | Rattus norvegicus Fibroblast growth factor receptor 1 (Fgfr1), mRNA [NM_024146]                                                  | 7,812 |
| Ccr12   | Rattus norvegicus chemokine (C-C motif) receptor-like 2 (Ccr12), mRNA [NM_001108191]                                             | 7,810 |
| Pigo    | Uncharacterized protein [Source:UniProtKB/TrEMBL;Acc:D3ZTP8] [ENSRNOT00000013213]                                                | 7,810 |
| Kctd2   | PREDICTED: Rattus norvegicus potassium channel tetramerisation domain containing 2 (Kctd2), mRNA [XM_001081684]                  | 7,810 |

|            |                                                                                                                                                        |              |
|------------|--------------------------------------------------------------------------------------------------------------------------------------------------------|--------------|
| Ces2i      | Uncharacterized protein [Source:UniProtKB/TrEMBL;Acc:D3ZE31] [ENSRNOT00000015997]                                                                      | <b>7,810</b> |
| Gpr98      | PREDICTED: Rattus norvegicus G protein-coupled receptor 98 (Gpr98), mRNA [XM_002725894]                                                                | <b>7,810</b> |
| Aen        | Rattus norvegicus apoptosis enhancing nuclease (Aen), mRNA [NM_001108487]                                                                              | <b>7,809</b> |
| 0          | Unknown                                                                                                                                                | <b>7,808</b> |
| 0          | O16480_CAEL (O16480) Serpentine receptor, class t protein 8, partial (5%) [TC627292]                                                                   | <b>7,807</b> |
| Shmt2      | Rattus norvegicus serine hydroxymethyltransferase 2 (mitochondrial) (Shmt2), nuclear gene encoding mitochondrial protein, mRNA [NM_001008322]          | <b>7,806</b> |
| Rmi1       | Uncharacterized protein [Source:UniProtKB/TrEMBL;Acc:D3ZHX4] [ENSRNOT00000025812]                                                                      | <b>7,805</b> |
| Taf8       | Rattus norvegicus TAF8 RNA polymerase II, TATA box binding protein (TBP)-associated factor (Taf8), mRNA [NM_001108197]                                 | <b>7,803</b> |
| Gabpb1l    | Rattus norvegicus GA binding protein transcription factor, beta subunit 1-like (Gabpb1l), mRNA [NM_001135015]                                          | <b>7,802</b> |
| Ctsa       | Rattus norvegicus cathepsin A (Ctsa), mRNA [NM_001011959]                                                                                              | <b>7,801</b> |
| Notch4     | Rattus norvegicus Notch homolog 4 (Drosophila) (Notch4), mRNA [NM_001002827]                                                                           | <b>7,801</b> |
| LOC500475  | Rattus norvegicus similar to hypothetical protein 4933430117 (LOC500475), mRNA [NM_001024346]                                                          | <b>7,800</b> |
| Slc7a1     | Rattus norvegicus solute carrier family 7 (cationic amino acid transporter, y+ system), member 1 (Slc7a1), mRNA [NM_013111]                            | <b>7,799</b> |
| Kat2a      | Rattus norvegicus K(lysine) acetyltransferase 2A (Kat2a), mRNA [NM_001107050]                                                                          | <b>7,799</b> |
| Myt1       | Rattus norvegicus myelin transcription factor 1 (Myt1), mRNA [NM_001108615]                                                                            | <b>7,797</b> |
| Map3k7ip1  | Rattus norvegicus mitogen-activated protein kinase kinase kinase 7 interacting protein 1 (Map3k7ip1), mRNA [NM_001109976]                              | <b>7,797</b> |
| LOC682861  | PREDICTED: Rattus norvegicus similar to adenomatosis polyposis coli down-regulated 1 (LOC682861), mRNA [XM_001063452]                                  | <b>7,796</b> |
| Rom1       | Rattus norvegicus retinal outer segment membrane protein 1 (Rom1), mRNA [NM_001009690]                                                                 | <b>7,796</b> |
| LOC684293  | PREDICTED: Rattus norvegicus similar to synaptotagmin XIV (LOC684293), mRNA [XM_001069763]                                                             | <b>7,795</b> |
| LOC689074  | Rattus norvegicus similar to Protein KIAA1543 (LOC689074), mRNA [NM_001144840]                                                                         | <b>7,795</b> |
| 0          | Unknown                                                                                                                                                | <b>7,794</b> |
| 0          | Rattus norvegicus similar to RIKEN cDNA A230102I05 (LOC308316), mRNA [XM_218209]                                                                       | <b>7,793</b> |
| RGD1562997 | Unknown                                                                                                                                                | <b>7,793</b> |
| Per3       | Rattus norvegicus period homolog 3 (Drosophila) (Per3), mRNA [NM_023978]                                                                               | <b>7,791</b> |
| Tbccd1     | Rattus norvegicus TBCC domain containing 1 (Tbccd1), mRNA [NM_001012016]                                                                               | <b>7,790</b> |
| Ppfia4     | Rattus norvegicus protein tyrosine phosphatase, receptor type, f polypeptide (PTPRF), interacting protein (liprin), alpha 4 (Ppfia4), mRNA [NM_080409] | <b>7,790</b> |
| Akna       | Rattus norvegicus AT-hook transcription factor (Akna), mRNA [NM_001108668]                                                                             | <b>7,789</b> |
| Znf511     | Rattus norvegicus zinc finger protein 511 (Znf511), mRNA [NM_001106309]                                                                                | <b>7,789</b> |
| RGD1307357 | Rattus norvegicus similar to hypothetical protein DKFZp434A1319 (RGD1307357), mRNA [NM_001106180]                                                      | <b>7,788</b> |
| 0          | Uncharacterized protein [Source:UniProtKB/TrEMBL;Acc:D3ZLJ4] [ENSRNOT00000041935]                                                                      | <b>7,788</b> |
| Zdhhc6     | Rattus norvegicus zinc finger, DHHC-type containing 6 (Zdhhc6), mRNA [NM_001037652]                                                                    | <b>7,787</b> |
| 0          | Unknown                                                                                                                                                | <b>7,786</b> |



|           |                                                                                                                                                                |       |
|-----------|----------------------------------------------------------------------------------------------------------------------------------------------------------------|-------|
| Shroom3   | Rattus norvegicus shroom family member 3 (Shroom3), mRNA [NM_001100889]                                                                                        | 7,786 |
| 0         | Unknown                                                                                                                                                        | 7,786 |
| 0         | Glyceraldehyde-3-phosphate dehydrogenase [Source:UniProtKB/TrEMBL;Acc:D3Z8U8] [ENSRNOT00000026712]                                                             | 7,784 |
| LOC690490 | PREDICTED: Rattus norvegicus similar to similar to RIKEN cDNA 1700001E04 (LOC690490), mRNA [XM_001074598]                                                      | 7,783 |
| Wdr8      | Rattus norvegicus WD repeat domain 8 (Wdr8), mRNA [NM_001014262]                                                                                               | 7,781 |
| Ireb2     | Rattus norvegicus iron responsive element binding protein 2 (Ireb2), mRNA [NM_022863]                                                                          | 7,781 |
| Nupr1     | Rattus norvegicus nuclear protein, transcriptional regulator, 1 (Nupr1), mRNA [NM_053611]                                                                      | 7,780 |
| LOC494539 | PREDICTED: Rattus norvegicus spectrin beta-like (LOC494539), miscRNA [XR_085708]                                                                               | 7,779 |
| Slc38a4   | Rattus norvegicus solute carrier family 38, member 4 (Slc38a4), mRNA [NM_130748]                                                                               | 7,779 |
| Ms4a15    | Rattus norvegicus membrane-spanning 4-domains, subfamily A, member 15 (Ms4a15), mRNA [NM_001191897]                                                            | 7,779 |
| Gmeb1     | Rattus norvegicus glucocorticoid modulatory element binding protein 1 (Gmeb1), mRNA [NM_001109268]                                                             | 7,779 |
| Igf2r     | Rattus norvegicus insulin-like growth factor 2 receptor (Igf2r), mRNA [NM_012756]                                                                              | 7,778 |
| 0         | Unknown                                                                                                                                                        | 7,778 |
| Cd69      | Rattus norvegicus Cd69 molecule (Cd69), mRNA [NM_134327]                                                                                                       | 7,777 |
| 0         | Hydin protein [Source:UniProtKB/TrEMBL;Acc:Q5BJQ9] [ENSRNOT00000059128]                                                                                        | 7,775 |
| Il1rn     | Rattus norvegicus interleukin 1 receptor antagonist (Il1rn), mRNA [NM_022194]                                                                                  | 7,773 |
| Srebf1    | Sterol regulatory element-binding protein 1Processed sterol regulatory element-binding protein 1 [Source:UniProtKB/Swiss-Prot;Acc:P56720] [ENSRNOT00000047053] | 7,772 |
| Med16     | Rattus norvegicus mediator complex subunit 16 (Med16), mRNA [NM_001106768]                                                                                     | 7,770 |
| 0         | Uncharacterized protein [Source:UniProtKB/TrEMBL;Acc:D3ZXP2] [ENSRNOT00000041819]                                                                              | 7,769 |
| Fkbp1b    | Rattus norvegicus FK506 binding protein 1b (Fkbp1b), mRNA [NM_022675]                                                                                          | 7,768 |
| Pip5k1a   | Rattus norvegicus phosphatidylinositol-4-phosphate 5-kinase, type 1, alpha (Pip5k1a), mRNA [NM_001042621]                                                      | 7,768 |
| Znf516    | Rattus norvegicus zinc finger protein 516 (Znf516), mRNA [NM_001191695]                                                                                        | 7,768 |
| Fem1b     | Rattus norvegicus fem-1 homolog b (C. elegans) (Fem1b), mRNA [NM_001108157]                                                                                    | 7,767 |
| Fah       | Rattus norvegicus fumarylacetoacetate hydrolase (Fah), mRNA [NM_017181]                                                                                        | 7,765 |
| 0         | Rattus norvegicus TL0AEA7YD23 mRNA sequence. [FQ231120]                                                                                                        | 7,764 |
| LOC301748 | PREDICTED: Rattus norvegicus similar to RIKEN cDNA 1700001E04 (LOC301748), mRNA [XM_002730085]                                                                 | 7,764 |
| Anks1a    | Rattus norvegicus ankyrin repeat and sterile alpha motif domain containing 1A (Anks1a), mRNA [NM_001107613]                                                    | 7,763 |
| Msgn1     | Rattus norvegicus mesogenin 1 (Msgn1), mRNA [NM_001109551]                                                                                                     | 7,762 |
| Usp2      | Rattus norvegicus ubiquitin specific peptidase 2 (Usp2), mRNA [NM_053774]                                                                                      | 7,762 |
| Zfp212    | PREDICTED: Rattus norvegicus Zinc finger protein 212 (Zfp212), mRNA [XM_001053455]                                                                             | 7,762 |
| Fam179a   | Uncharacterized protein [Source:UniProtKB/TrEMBL;Acc:D4A1L0] [ENSRNOT00000036374]                                                                              | 7,761 |
| Dbc1      | Rattus norvegicus deleted in bladder cancer 1 (human) (Dbc1), mRNA [NM_080482]                                                                                 | 7,760 |
| Cab39     | Rattus norvegicus calcium binding protein 39 (Cab39), mRNA [NM_001106924]                                                                                      | 7,758 |

|            |                                                                                                                                                       |       |
|------------|-------------------------------------------------------------------------------------------------------------------------------------------------------|-------|
| Mcm7       | Rattus norvegicus minichromosome maintenance complex component 7 (Mcm7), mRNA [NM_001004203]                                                          | 7,758 |
| Gpr21      | Rattus norvegicus G protein-coupled receptor 21 (Gpr21), mRNA [NM_001109554]                                                                          | 7,757 |
| LOC500251  | Rattus norvegicus hypothetical protein LOC500251 (LOC500251), mRNA [NM_001025047]                                                                     | 7,757 |
| Kcnn2      | Rattus norvegicus potassium intermediate/small conductance calcium-activated channel, subfamily N, member 2 (Kcnn2), mRNA [NM_019314]                 | 7,756 |
| RGD1307569 | PREDICTED: Rattus norvegicus similar to Protein C21orf63 homolog precursor, transcript variant 1 (RGD1307569), mRNA [XM_001073261]                    | 7,754 |
| Nol10      | Rattus norvegicus nucleolar protein 10 (Nol10), mRNA [NM_001014076]                                                                                   | 7,753 |
| Kcnh2      | Rattus norvegicus potassium voltage-gated channel, subfamily H (eag-related), member 2 (Kcnh2), mRNA [NM_053949]                                      | 7,753 |
| Psx1       | PREDICTED: Rattus norvegicus placenta specific homeobox 1 (Psx1), mRNA [XM_231064]                                                                    | 7,753 |
| Usp7       | Rattus norvegicus ubiquitin specific peptidase 7 (herpes virus-associated) (Usp7), mRNA [NM_001024790]                                                | 7,752 |
| LOC687295  | PREDICTED: Rattus norvegicus similar to translocase of inner mitochondrial membrane 50 homolog, transcript variant 2 (LOC687295), mRNA [XM_001073346] | 7,752 |
| Kctd3      | Rattus norvegicus potassium channel tetramerisation domain containing 3 (Kctd3), mRNA [NM_001107199]                                                  | 7,749 |
| Cox19      | Rattus norvegicus COX19 cytochrome c oxidase assembly homolog (S. cerevisiae) (Cox19), mRNA [NM_001107126]                                            | 7,748 |
| Slit1      | Rattus norvegicus slit homolog 1 (Drosophila) (Slit1), mRNA [NM_022953]                                                                               | 7,748 |
| Hip1r      | Rattus norvegicus huntingtin interacting protein 1 related (Hip1r), transcript variant 1, mRNA [NM_001134763]                                         | 7,748 |
| Nup214     | Rattus norvegicus nucleoporin 214 (Nup214), mRNA [NM_001168559]                                                                                       | 7,747 |
| 0          | Rattus norvegicus similar to hypothetical protein DKFZp761B107 (LOC305415), mRNA [XM_223492]                                                          | 7,746 |
| Fam8a1     | Uncharacterized protein [Source:UniProtKB/TrEMBL;Acc:D3ZBT7] [ENSRNOT00000060500]                                                                     | 7,744 |
| Igfbp7     | Rattus norvegicus insulin-like growth factor binding protein 7 (Igfbp7), mRNA [NM_001013048]                                                          | 7,744 |
| LOC366300  | PREDICTED: Rattus norvegicus hypothetical LOC366300 (LOC366300), mRNA [XM_002726499]                                                                  | 7,744 |
| 0          | RGD1311624 protein [Source:UniProtKB/TrEMBL;Acc:Q4G026] [ENSRNOT00000054990]                                                                          | 7,743 |
| 0          | Unknown                                                                                                                                               | 7,742 |
| 0          | Unknown                                                                                                                                               | 7,742 |
| Prune      | Rattus norvegicus prune homolog (Drosophila) (Prune), mRNA [NM_001007697]                                                                             | 7,742 |
| Tppp3      | Rattus norvegicus tubulin polymerization-promoting protein family member 3 (Tppp3), mRNA [NM_001009639]                                               | 7,741 |
| Dimt1l     | Rattus norvegicus DIM1 dimethyladenosine transferase 1-like (S. cerevisiae) (Dimt1l), mRNA [NM_001106408]                                             | 7,741 |
| Akap1      | A-kinase anchor protein 1, mitochondrial [Source:UniProtKB/Swiss-Prot;Acc:O88884] [ENSRNOT00000003251]                                                | 7,740 |
| Ankrd50    | Rattus norvegicus ankyrin repeat domain 50 (Ankrd50), mRNA [NM_001191606]                                                                             | 7,740 |
| Akr1b10    | Rattus norvegicus aldo-keto reductase family 1, member B10 (aldose reductase) (Akr1b10), mRNA [NM_001013084]                                          | 7,739 |
| Farp2      | Rattus norvegicus FERM, RhoGEF and pleckstrin domain protein 2 (Farp2), mRNA [NM_001108233]                                                           | 7,736 |
| Gnai3      | Rattus norvegicus guanine nucleotide binding protein (G protein), alpha inhibiting 3 (Gnai3), mRNA [NM_013106]                                        | 7,736 |
| Klhl35     | Uncharacterized protein [Source:UniProtKB/TrEMBL;Acc:D4A6V5] [ENSRNOT00000023386]                                                                     | 7,734 |
| Ska2       | Rattus norvegicus spindle and kinetochore associated complex subunit 2 (Ska2), mRNA [NM_001009624]                                                    | 7,733 |
| 0          | mannosyl-oligosaccharide 1,2-alpha-mannosidase IA [Source:RefSeq peptide;Acc:NP_001028828] [ENSRNOT00000041738]                                       | 7,733 |

|            |                                                                                                                                                           |       |
|------------|-----------------------------------------------------------------------------------------------------------------------------------------------------------|-------|
| Spata13    | Rattus norvegicus spermatogenesis associated 13 (Spata13), mRNA [NM_001191686]                                                                            | 7,733 |
| Myocd      | Rattus norvegicus myocardin (Myocd), mRNA [NM_182667]                                                                                                     | 7,732 |
| 0          | Uncharacterized protein [Source:UniProtKB/TrEMBL;Acc:D3ZPI3] [ENSRNOT00000038791]                                                                         | 7,732 |
| Ppfia2     | Rattus norvegicus protein tyrosine phosphatase, receptor type, f polypeptide (PTPRF), interacting protein (liprin), alpha 2 (Ppfia2), mRNA [NM_001108745] | 7,731 |
| Arap2      | Rattus norvegicus ArfGAP with RhoGAP domain, ankyrin repeat and PH domain 2 (Arap2), mRNA [NM_001107216]                                                  | 7,731 |
| Cyp2b3     | Rattus norvegicus cytochrome P450, family 2, subfamily b, polypeptide 3 (Cyp2b3), mRNA [NM_173294]                                                        | 7,729 |
| Igfbp3     | Rattus norvegicus insulin-like growth factor binding protein 3 (Igfbp3), mRNA [NM_012588]                                                                 | 7,727 |
| Mtdh       | Rattus norvegicus metadherin (Mtdh), mRNA [NM_133398]                                                                                                     | 7,727 |
| Secisbp2l  | Rattus norvegicus SECIS binding protein 2-like (Secisbp2l), mRNA [NM_001168527]                                                                           | 7,726 |
| LOC687465  | PREDICTED: Rattus norvegicus hypothetical protein LOC687465 (LOC687465), mRNA [XM_001078693]                                                              | 7,726 |
| Psm1       | Rattus norvegicus proteasome (prosome, macropain) 26S subunit, non-ATPase, 1 (Psm1), mRNA [NM_031978]                                                     | 7,726 |
| RGD1307603 | Rattus norvegicus similar to hypothetical protein MGC37914 (RGD1307603), mRNA [NM_001134508]                                                              | 7,725 |
| LOC308954  | Rattus norvegicus similar to hypothetical protein MGC50721 (LOC308954), mRNA [NM_001024777]                                                               | 7,725 |
| 0          | Unknown                                                                                                                                                   | 7,724 |
| Adck1      | Rattus norvegicus aarF domain containing kinase 1 (Adck1), mRNA [NM_001108985]                                                                            | 7,722 |
| Cdc73      | Rattus norvegicus cell division cycle 73, Paf1/RNA polymerase II complex component, homolog (S. cerevisiae) (Cdc73), mRNA [NM_001024769]                  | 7,722 |
| 0          | Q80XK5_MOUSE (Q80XK5) Frmpd1 protein (Fragment), partial (23%) [TC584718]                                                                                 | 7,721 |
| Rnasel     | Rattus norvegicus ribonuclease L (2',5'-oligoadenylate synthetase-dependent) (Rnasel), mRNA [NM_182673]                                                   | 7,720 |
| Pomgnt1    | Rattus norvegicus protein O-linked mannose beta1,2-N-acetylglucosaminyltransferase (Pomgnt1), mRNA [NM_001007747]                                         | 7,720 |
| Arhgap10   | Rattus norvegicus Rho GTPase activating protein 10 (Arhgap10), mRNA [NM_001109501]                                                                        | 7,720 |
| Apbb1ip    | Rattus norvegicus amyloid beta (A4) precursor protein-binding, family B, member 1 interacting protein (Apbb1ip), mRNA [NM_001100577]                      | 7,719 |
| 0          | PREDICTED: Rattus norvegicus SPT2, Suppressor of Ty, domain containing 1 (S. cerevisiae) (Spty2d1), mRNA [XM_002726380]                                   | 7,718 |
| Crebzf     | Rattus norvegicus CREB/ATF bZIP transcription factor (Crebzf), mRNA [NM_001106279]                                                                        | 7,718 |
| Dennd3     | PREDICTED: Rattus norvegicus DENN/MADD domain containing 3 (Dennd3), mRNA [XM_001072997]                                                                  | 7,718 |
| Hars2l     | Rattus norvegicus histidyl-tRNA synthetase 2-like (Hars2l), mRNA [NM_001014012]                                                                           | 7,717 |
| RGD1305481 | Rattus norvegicus hypothetical LOC294030 (RGD1305481), mRNA [NM_001047856]                                                                                | 7,717 |
| Scgb3a1    | Rattus norvegicus secretoglobin, family 3A, member 1 (Scgb3a1), mRNA [NM_001013180]                                                                       | 7,716 |
| Dcaf6      | Similar to IQ motif and WD repeats 1 (Predicted)Uncharacterized protein [Source:UniProtKB/TrEMBL;Acc:D4A8L4] [ENSRNOT00000004199]                         | 7,715 |
| Olr1701    | Rattus norvegicus olfactory receptor 1701 (Olr1701), mRNA [NM_001001114]                                                                                  | 7,713 |
| 0          | Unknown                                                                                                                                                   | 7,713 |
| RGD1559859 | PREDICTED: Rattus norvegicus RGD1559859 (RGD1559859), mRNA [XM_001072031]                                                                                 | 7,713 |
| Twistnb    | Rattus norvegicus TWIST neighbor (Twistnb), mRNA [NM_001108707]                                                                                           | 7,713 |
| 0          | Unknown                                                                                                                                                   | 7,713 |

|            |                                                                                                                                                |       |
|------------|------------------------------------------------------------------------------------------------------------------------------------------------|-------|
| Snapc5     | Rattus norvegicus small nuclear RNA activating complex, polypeptide 5 (Snapc5), mRNA [NM_001109643]                                            | 7,711 |
| Coch       | Rattus norvegicus coagulation factor C homolog, cochlin (Limulus polyphemus) (Coch), mRNA [NM_001108710]                                       | 7,710 |
| S100a10    | Rattus norvegicus S100 calcium binding protein A10 (S100a10), mRNA [NM_031114]                                                                 | 7,710 |
| Gpld1      | Rattus norvegicus glycosylphosphatidylinositol specific phospholipase D1 (Gpld1), mRNA [NM_001100512]                                          | 7,710 |
| 0          | Unknown                                                                                                                                        | 7,709 |
| Dstn       | Rattus norvegicus destrin (Dstn), mRNA [NM_001033666]                                                                                          | 7,708 |
| Evl        | Rattus norvegicus Enah/Vasp-like (Evl), mRNA [NM_024147]                                                                                       | 7,707 |
| Klhl24     | Rattus norvegicus kelch-like 24 (Drosophila) (Klhl24), mRNA [NM_181473]                                                                        | 7,707 |
| RGD1560046 | PREDICTED: Rattus norvegicus similar to 3110052M02Rik protein (RGD1560046), mRNA [XM_574335]                                                   | 7,706 |
| 0          | membrane-bound transcription factor site-2 protease [Source:RefSeq peptide;Acc:NP_001030179] [ENSRNOT00000010089]                              | 7,706 |
| Fbxo28     | Rattus norvegicus F-box protein 28 (Fbxo28), mRNA [NM_001107203]                                                                               | 7,705 |
| Uqcrh      | Rattus norvegicus ubiquinol-cytochrome c reductase hinge protein (Uqcrh), nuclear gene encoding mitochondrial protein, mRNA [NM_001009480]     | 7,704 |
| 0          | 2',5'-phosphodiesterase 12 [Source:UniProtKB/Swiss-Prot;Acc:Q6AXQ5] [ENSRNOT00000017800]                                                       | 7,704 |
| LOC680722  | PREDICTED: Rattus norvegicus hypothetical protein LOC680722 (LOC680722), mRNA [XM_001058566]                                                   | 7,703 |
| Vom1r22    | Rattus norvegicus vomeronasal 1 receptor 22 (Vom1r22), mRNA [NM_001008900]                                                                     | 7,703 |
| Prpg1      | Rattus norvegicus proline-rich proteoglycan 1 (Prpg1), mRNA [NM_172064]                                                                        | 7,701 |
| 0          | Unknown                                                                                                                                        | 7,700 |
| Spcs3      | Rattus norvegicus signal peptidase complex subunit 3 homolog (S. cerevisiae) (Spcs3), mRNA [NM_001191073]                                      | 7,700 |
| Zxdc       | Uncharacterized protein [Source:UniProtKB/TrEMBL;Acc:D3ZYP0] [ENSRNOT00000038244]                                                              | 7,700 |
| Rbm15b     | RCG25263Uncharacterized protein [Source:UniProtKB/TrEMBL;Acc:D3ZHD6] [ENSRNOT00000018995]                                                      | 7,699 |
| Cdc25b     | Rattus norvegicus cell division cycle 25 homolog B (S. pombe) (Cdc25b), mRNA [NM_133572]                                                       | 7,699 |
| Tnfrsf4    | Rattus norvegicus tumor necrosis factor receptor superfamily, member 4 (Tnfrsf4), mRNA [NM_013049]                                             | 7,697 |
| Grsf1      | Rattus norvegicus G-rich RNA sequence binding factor 1 (Grsf1), mRNA [NM_001100890]                                                            | 7,696 |
| Supv3l1    | Rattus norvegicus suppressor of var1, 3-like 1 (S. cerevisiae) (Supv3l1), mRNA [NM_001012462]                                                  | 7,695 |
| Znf597     | Rattus norvegicus zinc finger protein 597 (Znf597), mRNA [NM_153732]                                                                           | 7,694 |
| Galnt3     | Rattus norvegicus UDP-N-acetyl-alpha-D-galactosamine:polypeptide N-acetylgalactosaminyltransferase 3 (GalNAc-T3) (Galnt3), mRNA [NM_001015032] | 7,694 |
| Arfgap2    | Rattus norvegicus ADP-ribosylation factor GTPase activating protein 2 (Arfgap2), mRNA [NM_001033707]                                           | 7,694 |
| Arrdc2     | Rattus norvegicus arrestin domain containing 2 (Arrdc2), mRNA [NM_001107303]                                                                   | 7,693 |
| Nup160     | Rattus norvegicus nucleoporin 160 (Nup160), mRNA [NM_001107744]                                                                                | 7,693 |
| Lgr5       | Rattus norvegicus leucine rich repeat containing G protein coupled receptor 5 (Lgr5), mRNA [NM_001106784]                                      | 7,691 |
| 0          | Unknown                                                                                                                                        | 7,690 |
| Med10      | Rattus norvegicus mediator complex subunit 10 (Med10), mRNA [NM_001106097]                                                                     | 7,690 |
| Apex2      | Uncharacterized protein [Source:UniProtKB/TrEMBL;Acc:D3ZHV4] [ENSRNOT00000038157]                                                              | 7,689 |

|            |                                                                                                                                                |       |
|------------|------------------------------------------------------------------------------------------------------------------------------------------------|-------|
| 0          | Golgi integral membrane protein 4 [Source:UniProtKB/Swiss-Prot;Acc:Q5BJK8] [ENSRNOT00000064588]                                                | 7,686 |
| 0          | Unknown                                                                                                                                        | 7,685 |
| Mtmr6      | Rattus norvegicus myotubularin related protein 6 (Mtmr6), mRNA [NM_001107268]                                                                  | 7,685 |
| Rab11fip3  | Peroxisomal 2,4-dienoyl-CoA reductase [Source:UniProtKB/Swiss-Prot;Acc:Q9Z2M4] [ENSRNOT00000027467]                                            | 7,683 |
| Zfp90      | Rattus norvegicus zinc finger protein 90 (Zfp90), mRNA [NM_001025765]                                                                          | 7,683 |
| Vstm2b     | Rattus norvegicus V-set and transmembrane domain containing 2B (Vstm2b), mRNA [NM_001108479]                                                   | 7,681 |
| Tll2       | Rattus norvegicus tolloid-like 2 (Tll2), mRNA [NM_001191898]                                                                                   | 7,680 |
| 0          | Rattus norvegicus similar to ets variant gene 5 (LOC294776), mRNA [XM_226808]                                                                  | 7,680 |
| Rhpn2      | Rattus norvegicus rhophilin, Rho GTPase binding protein 2 (Rhpn2), mRNA [NM_001107505]                                                         | 7,680 |
| 0          | Unknown                                                                                                                                        | 7,679 |
| Lypd3      | Rattus norvegicus Ly6/Plaur domain containing 3 (Lypd3), mRNA [NM_021759]                                                                      | 7,678 |
| LOC298795  | Rattus norvegicus similar to 14-3-3 protein sigma (LOC298795), mRNA [NM_001013941]                                                             | 7,677 |
| Mrpl40     | Rattus norvegicus mitochondrial ribosomal protein L40 (Mrpl40), nuclear gene encoding mitochondrial protein, mRNA [NM_001024865]               | 7,671 |
| Ppp3r1     | Rattus norvegicus protein phosphatase 3, regulatory subunit B, alpha isoform (Ppp3r1), mRNA [NM_017309]                                        | 7,670 |
| Lass5      | Rattus norvegicus LAG1 homolog, ceramide synthase 5 (Lass5), mRNA [NM_001108993]                                                               | 7,669 |
| Haus8      | Rattus norvegicus HAUS augmin-like complex, subunit 8 (Haus8), mRNA [NM_001024971]                                                             | 7,669 |
| 0          | Palladin [Source:UniProtKB/Swiss-Prot;Acc:P0C5E3] [ENSRNOT00000013636]                                                                         | 7,669 |
| Tmem223    | Rattus norvegicus transmembrane protein 223 (Tmem223), mRNA [NM_001191104]                                                                     | 7,668 |
| LOC691254  | PREDICTED: Rattus norvegicus hypothetical protein LOC691254 (LOC691254), mRNA [XM_001077402]                                                   | 7,668 |
| 0          | Unknown                                                                                                                                        | 7,667 |
| 0          | Unknown                                                                                                                                        | 7,666 |
| 0          | Uncharacterized protein [Source:UniProtKB/TrEMBL;Acc:D3Z9J6] [ENSRNOT00000043839]                                                              | 7,666 |
| RGD1563888 | Rattus norvegicus similar to DNA segment, Chr 16, ERATO Doi 472, expressed (RGD1563888), mRNA [NM_001108312]                                   | 7,666 |
| Snx16      | Rattus norvegicus sorting nexin 16 (Snx16), mRNA [NM_022289]                                                                                   | 7,665 |
| RGD1565390 | PREDICTED: Rattus norvegicus similar to putative protein kinase (RGD1565390), mRNA [XM_344843]                                                 | 7,664 |
| 0          | Unknown                                                                                                                                        | 7,661 |
| Nfkbid     | PREDICTED: Rattus norvegicus nuclear factor of kappa light polypeptide gene enhancer in B-cells inhibitor, delta (Nfkbid), mRNA [XM_001079086] | 7,660 |
| Actb12     | Rattus norvegicus actin, beta-like 2 (Actb12), mRNA [NM_001106409]                                                                             | 7,660 |
| Gpr27      | Rattus norvegicus G protein-coupled receptor 27 (Gpr27), mRNA [NM_023099]                                                                      | 7,657 |
| Zfp426l    | Rattus norvegicus zinc finger protein 426-like (Zfp426l), mRNA [NM_001135018]                                                                  | 7,655 |
| Ino80b     | Rattus norvegicus INO80 complex subunit B (Ino80b), mRNA [NM_001048233]                                                                        | 7,654 |
| Sfrs9      | Rattus norvegicus splicing factor, arginine/serine-rich 9 (Sfrs9), mRNA [NM_001009255]                                                         | 7,654 |
| Unc84a     | Rattus norvegicus unc-84 homolog A (C. elegans) (Unc84a), mRNA [NM_001007147]                                                                  | 7,653 |
| LOC679934  | Rattus norvegicus similar to chromosome 3 open reading frame 10 (LOC679934), mRNA [NM_001195476]                                               | 7,651 |

|            |                                                                                                                                                                         |       |
|------------|-------------------------------------------------------------------------------------------------------------------------------------------------------------------------|-------|
| Klf14      | Rattus norvegicus Kruppel-like factor 14 (Klf14), mRNA [NM_001135094]                                                                                                   | 7,650 |
| Rif1       | Uncharacterized protein [Source:UniProtKB/TrEMBL;Acc:D3ZLT9] [ENSRNOT00000008201]                                                                                       | 7,649 |
| Zc3h13     | Rattus norvegicus zinc finger CCCH type containing 13 (Zc3h13), mRNA [NM_001170471]                                                                                     | 7,649 |
| 0          | TF7L2_HUMAN (Q9NQB0) Transcription factor 7-like 2 (HMG box transcription factor 4) (T-cell-specific transcription factor 4) (TCF-4) (hTCF-4), partial (58%) [TC603124] | 7,649 |
| 0          | Unknown                                                                                                                                                                 | 7,647 |
| RGD1563667 | Rattus norvegicus similar to TDPOZ3 (RGD1563667), mRNA [NM_001100985]                                                                                                   | 7,647 |
| Fam123c    | Uncharacterized protein [Source:UniProtKB/TrEMBL;Acc:D3ZHS8] [ENSRNOT000000033700]                                                                                      | 7,646 |
| S100a6     | Rattus norvegicus S100 calcium binding protein A6 (S100a6), mRNA [NM_053485]                                                                                            | 7,645 |
| Vezt       | Rattus norvegicus vezatin, adherens junctions transmembrane protein (Vezt), mRNA [NM_001006984]                                                                         | 7,644 |
| Cdkl2      | Rattus norvegicus cyclin-dependent kinase-like 2 (CDC2-related kinase) (Cdkl2), mRNA [NM_001012035]                                                                     | 7,643 |
| Eif2s1     | Rattus norvegicus eukaryotic translation initiation factor 2, subunit 1 alpha (Eif2s1), mRNA [NM_019356]                                                                | 7,643 |
| LOC300308  | Rattus norvegicus similar to hypothetical protein 4930509O22 (LOC300308), mRNA [NM_001013952]                                                                           | 7,642 |
| Hexim2     | Rattus norvegicus hexamethylene bis-acetamide inducible 2 (Hexim2), mRNA [NM_001107054]                                                                                 | 7,642 |
| Csrnp1     | Rattus norvegicus cysteine-serine-rich nuclear protein 1 (Csrnp1), mRNA [NM_001108786]                                                                                  | 7,642 |
| 0          | Unknown                                                                                                                                                                 | 7,641 |
| Rwdd2b     | Rattus norvegicus RWD domain containing 2B (Rwdd2b), mRNA [NM_001100559]                                                                                                | 7,641 |
| Mgat2      | Rattus norvegicus mannosyl (alpha-1,6-)-glycoprotein beta-1,2-N-acetylglucosaminyltransferase (Mgat2), mRNA [NM_053604]                                                 | 7,640 |
| Macrod1    | Rattus norvegicus MACRO domain containing 1 (Macrod1), mRNA [NM_139337]                                                                                                 | 7,638 |
| Mccc2      | Rattus norvegicus methylcrotonoyl-Coenzyme A carboxylase 2 (beta) (Mccc2), nuclear gene encoding mitochondrial protein, mRNA [NM_001012177]                             | 7,637 |
| Zfp84      | Rattus norvegicus zinc finger protein 84 (Zfp84), mRNA [NM_001107500]                                                                                                   | 7,637 |
| 0          | Rattus norvegicus Ac1-290 mRNA, complete cds. [AY321322]                                                                                                                | 7,636 |
| Mettl6     | Rattus norvegicus methyltransferase like 6 (Mettl6), mRNA [NM_001007623]                                                                                                | 7,636 |
| Stk17b     | Rattus norvegicus serine/threonine kinase 17b (Stk17b), mRNA [NM_133392]                                                                                                | 7,635 |
| Rbm3       | Rattus norvegicus RNA binding motif (RNP1, RRM) protein 3 (Rbm3), mRNA [NM_053696]                                                                                      | 7,634 |
| RGD1311745 | Rattus norvegicus similar to RIKEN cDNA 1110059G10 (RGD1311745), mRNA [NM_001008329]                                                                                    | 7,634 |
| 0          | Uncharacterized protein [Source:UniProtKB/TrEMBL;Acc:D3ZNC7] [ENSRNOT000000057981]                                                                                      | 7,634 |
| 0          | Unknown                                                                                                                                                                 | 7,633 |
| RGD1565859 | PREDICTED: Rattus norvegicus RGD1565859 (RGD1565859), mRNA [XM_001063482]                                                                                               | 7,632 |
| Slco4c1    | Rattus norvegicus solute carrier organic anion transporter family, member 4C1 (Slco4c1), mRNA [NM_001002024]                                                            | 7,632 |
| Gcat       | Rattus norvegicus glycine C-acetyltransferase (2-amino-3-ketobutyrate-coenzyme A ligase) (Gcat), nuclear gene encoding mitochondrial protein, mRNA [NM_001024277]       | 7,631 |
| RGD1306746 | Rattus norvegicus similar to Hypothetical protein MGC25529 (RGD1306746), mRNA [NM_001107872]                                                                            | 7,631 |

|            |                                                                                                                                           |              |
|------------|-------------------------------------------------------------------------------------------------------------------------------------------|--------------|
| Trim11     | Rattus norvegicus tripartite motif-containing 11 (Trim11), mRNA [NM_001108276]                                                            | <b>7,629</b> |
| Zp3        | Rattus norvegicus zona pellucida glycoprotein 3 (sperm receptor) (Zp3), mRNA [NM_053762]                                                  | <b>7,627</b> |
| 0          | Unknown                                                                                                                                   | <b>7,627</b> |
| RGD1308430 | Rattus norvegicus similar to 1700123O20Rik protein (RGD1308430), mRNA [NM_001108376]                                                      | <b>7,626</b> |
| 0          | Unknown                                                                                                                                   | <b>7,625</b> |
| Phyh       | Rattus norvegicus phytanoyl-CoA 2-hydroxylase (Phyh), mRNA [NM_053674]                                                                    | <b>7,624</b> |
| 0          | Unknown                                                                                                                                   | <b>7,623</b> |
| 0          | Unknown                                                                                                                                   | <b>7,623</b> |
| 0          | Unknown                                                                                                                                   | <b>7,623</b> |
| 0          | Unknown                                                                                                                                   | <b>7,623</b> |
| Pde10a     | Rattus norvegicus phosphodiesterase 10A (Pde10a), mRNA [NM_022236]                                                                        | <b>7,622</b> |
| LOC688083  | PREDICTED: Rattus norvegicus similar to LRP16 protein, transcript variant 2 (LOC688083), mRNA [XM_001080245]                              | <b>7,621</b> |
| Gpr165     | Rattus norvegicus G protein-coupled receptor 165 (Gpr165), mRNA [NM_001106582]                                                            | <b>7,621</b> |
| Usp25      | Rattus norvegicus ubiquitin specific peptidase 25 (Usp25), mRNA [NM_001107114]                                                            | <b>7,621</b> |
| Rtn4rl1    | Rattus norvegicus reticulon 4 receptor-like 1 (Rtn4rl1), mRNA [NM_181377]                                                                 | <b>7,620</b> |
| Gabra4     | Rattus norvegicus gamma-aminobutyric acid (GABA) A receptor, alpha 4 (Gabra4), mRNA [NM_080587]                                           | <b>7,619</b> |
| Cdk105     | Rattus norvegicus CDK105 protein (Cdk105), mRNA [NM_134415]                                                                               | <b>7,618</b> |
| Ephx1      | Rattus norvegicus epoxide hydrolase 1, microsomal (Ephx1), transcript variant 2, mRNA [NM_012844]                                         | <b>7,617</b> |
| 0          | Unknown                                                                                                                                   | <b>7,614</b> |
| 0          | Uncharacterized protein [Source:UniProtKB/TrEMBL;Acc:D4A391] [ENSRNOT00000066991]                                                         | <b>7,614</b> |
| Serpinb6a  | Rattus norvegicus serine (or cysteine) peptidase inhibitor, clade B, member 6a (Serpinb6a), mRNA [NM_199085]                              | <b>7,614</b> |
| Lenep      | Rattus norvegicus lens epithelial protein (Lenep), mRNA [NM_053614]                                                                       | <b>7,613</b> |
| 0          | Unknown                                                                                                                                   | <b>7,612</b> |
| LOC684274  | Rattus norvegicus similar to RIKEN cDNA 2810012L14 (LOC684274), mRNA [NM_001115041]                                                       | <b>7,611</b> |
| Bcat2      | Rattus norvegicus branched chain aminotransferase 2, mitochondrial (Bcat2), nuclear gene encoding mitochondrial protein, mRNA [NM_022400] | <b>7,610</b> |
| Coq2       | Rattus norvegicus coenzyme Q2 homolog, prenyltransferase (yeast) (Coq2), nuclear gene encoding mitochondrial protein, mRNA [NM_001044255] | <b>7,610</b> |
| Gpha2      | Rattus norvegicus glycoprotein hormone alpha 2 (Gpha2), mRNA [NM_133619]                                                                  | <b>7,609</b> |
| Usp1       | Rattus norvegicus ubiquitin specific peptidase 1 (Usp1), mRNA [NM_001015015]                                                              | <b>7,605</b> |
| 0          | Unknown                                                                                                                                   | <b>7,605</b> |
| LOC687708  | Rattus norvegicus hypothetical protein LOC687708 (LOC687708), mRNA [NM_001101016]                                                         | <b>7,605</b> |
| Eif5b      | Rattus norvegicus eukaryotic translation initiation factor 5B (Eif5b), mRNA [NM_001110141]                                                | <b>7,604</b> |
| Zbtb38     | Rattus norvegicus zinc finger and BTB domain containing 38 (Zbtb38), mRNA [NM_001012471]                                                  | <b>7,602</b> |
| Ckmt1      | Rattus norvegicus creatine kinase, mitochondrial 1 (Ckmt1), nuclear gene encoding mitochondrial protein, mRNA [NM_001012738]              | <b>7,602</b> |

|            |                                                                                                                                             |       |
|------------|---------------------------------------------------------------------------------------------------------------------------------------------|-------|
| Sstr4      | Rattus norvegicus somatostatin receptor 4 (Sstr4), mRNA [NM_013036]                                                                         | 7,601 |
| Osgepl1    | Rattus norvegicus O-sialoglycoprotein endopeptidase-like 1 (Osgepl1), mRNA [NM_001024787]                                                   | 7,600 |
| B3galt2    | Rattus norvegicus UDP-Gal:betaGlcNAc beta 1,3-galactosyltransferase, polypeptide 2 (B3galt2), mRNA [NM_001109492]                           | 7,600 |
| 0          | Rattus norvegicus similar to glyceraldehyde-3-phosphate dehydrogenase (phosphorylating) (EC 1.2.1.12) - mouse (LOC302809), mRNA [XM_229109] | 7,600 |
| Npy5r      | Rattus norvegicus neuropeptide Y receptor Y5 (Npy5r), mRNA [NM_012869]                                                                      | 7,599 |
| Gpr149     | Rattus norvegicus G protein-coupled receptor 149 (Gpr149), mRNA [NM_138891]                                                                 | 7,599 |
| LOC685909  | Rattus norvegicus similar to H2A histone family, member V isoform 1 (LOC685909), mRNA [NM_001106019]                                        | 7,599 |
| Rnf168     | Rattus norvegicus ring finger protein 168 (Rnf168), mRNA [NM_001127597]                                                                     | 7,599 |
| Zfp653     | Rattus norvegicus zinc finger protein 653 (Zfp653), mRNA [NM_001106807]                                                                     | 7,598 |
| RGD1306917 | Rattus norvegicus similar to RIKEN cDNA 2900010M23 (RGD1306917), mRNA [NM_001108528]                                                        | 7,595 |
| Prkag3     | Rattus norvegicus protein kinase, AMP-activated, gamma 3 non-catalytic subunit (Prkag3), mRNA [NM_001106921]                                | 7,595 |
| Armc9      | Rattus norvegicus armadillo repeat containing 9 (Armc9), mRNA [NM_001109663]                                                                | 7,593 |
| Tnks2      | Rattus norvegicus tankyrase, TRF1-interacting ankyrin-related ADP-ribose polymerase 2 (Tnks2), mRNA [NM_001107607]                          | 7,593 |
| Zeb2       | Rattus norvegicus zinc finger E-box binding homeobox 2 (Zeb2), mRNA [NM_001033701]                                                          | 7,593 |
| Slc35b4    | Rattus norvegicus solute carrier family 35, member B4 (Slc35b4), mRNA [NM_001106590]                                                        | 7,592 |
| RGD1310262 | Rattus norvegicus hypothetical LOC304650 (RGD1310262), mRNA [NM_001107161]                                                                  | 7,591 |
| Cabyr      | Rattus norvegicus calcium binding tyrosine-(Y)-phosphorylation regulated (Cabyr), mRNA [NM_001143893]                                       | 7,590 |
| Mon1a      | Rattus norvegicus MON1 homolog A (yeast) (Mon1a), mRNA [NM_001126284]                                                                       | 7,588 |
| 0          | Unknown                                                                                                                                     | 7,588 |
| RGD1309821 | Rattus norvegicus similar to KIAA1161 protein (RGD1309821), mRNA [NM_001108971]                                                             | 7,588 |
| RGD1563634 | Rattus norvegicus similar to R31449_3 (RGD1563634), mRNA [NM_001081447]                                                                     | 7,587 |
| 0          | Uncharacterized protein [Source:UniProtKB/TrEMBL;Acc:D3ZJN7] [ENSRNOT00000003207]                                                           | 7,587 |
| LOC498601  | PREDICTED: Rattus norvegicus similar to cyclin B2 (LOC498601), miscRNA [XR_006448]                                                          | 7,586 |
| C1qI4      | Complement component 1, q subcomponent-like 4 (Predicted)Uncharacterized protein [Source:UniProtKB/TrEMBL;Acc:D3ZMN4] [ENSRNOT00000003152]  | 7,586 |
| Plscr1     | Rattus norvegicus phospholipid scramblase 1 (Plscr1), mRNA [NM_057194]                                                                      | 7,586 |
| Zfp709I2   | Rattus norvegicus zinc finger protein 709-like 2 (Zfp709I2), mRNA [NM_001163062]                                                            | 7,586 |
| Rgs11      | Rattus norvegicus regulator of G-protein signaling 11 (Rgs11), mRNA [NM_019338]                                                             | 7,583 |
| Vav2       | Rattus norvegicus vav 2 guanine nucleotide exchange factor (Vav2), mRNA [NM_001106563]                                                      | 7,583 |
| Slc16a6    | Rattus norvegicus solute carrier family 16, member 6 (monocarboxylic acid transporter 7) (Slc16a6), mRNA [NM_198760]                        | 7,582 |
| Cisd2      | Rattus norvegicus CDGSH iron sulfur domain 2 (Cisd2), mRNA [NM_001191608]                                                                   | 7,582 |
| 0          | Uncharacterized protein [Source:UniProtKB/TrEMBL;Acc:D3ZAK7] [ENSRNOT000000038415]                                                          | 7,581 |
| Mrpl35     | Rattus norvegicus mitochondrial ribosomal protein L35 (Mrpl35), nuclear gene encoding mitochondrial protein, mRNA [NM_001106596]            | 7,579 |



|              |                                                                                                                                                                                            |              |
|--------------|--------------------------------------------------------------------------------------------------------------------------------------------------------------------------------------------|--------------|
| Ttll1        | Ttll1 protein [Source:UniProtKB/TrEMBL;Acc:B5DFG3] [ENSRNOT00000032204]                                                                                                                    | <b>7,579</b> |
| RGD1559662   | PREDICTED: Rattus norvegicus similar to implantation serine proteinase 2 (RGD1559662), mRNA [XM_001059769]                                                                                 | <b>7,577</b> |
| Micb         | Rattus norvegicus MHC class I polypeptide-related sequence B (Micb), mRNA [NM_001017468]                                                                                                   | <b>7,577</b> |
| RGD1563365   | PREDICTED: Rattus norvegicus similar to DNA segment, Chr 10, Wayne State University 102, expressed (RGD1563365), mRNA [XM_002729760]                                                       | <b>7,577</b> |
| 0            | PREDICTED: Rattus norvegicus similar to High mobility group protein 1 (HMG-1) (High mobility group protein B1) (Amphoterin) (Heparin-binding protein p30) (LOC685091), mRNA [XM_001062256] | <b>7,574</b> |
| 0            | Uncharacterized protein [Source:UniProtKB/TrEMBL;Acc:D3Z8J8] [ENSRNOT00000058230]                                                                                                          | <b>7,572</b> |
| 0            | Unknown                                                                                                                                                                                    | <b>7,570</b> |
| LOC100302465 | Rattus norvegicus hypothetical LOC100302465 (LOC100302465), mRNA [NM_001163214]                                                                                                            | <b>7,570</b> |
| LOC688909    | PREDICTED: Rattus norvegicus hypothetical protein LOC688909 (LOC688909), mRNA [XM_001068783]                                                                                               | <b>7,568</b> |
| LOC680039    | Rattus norvegicus hypothetical protein LOC680039 (LOC680039), mRNA [NM_001109388]                                                                                                          | <b>7,568</b> |
| 0            | Unknown                                                                                                                                                                                    | <b>7,567</b> |
| Pdcl2        | PREDICTED: Rattus norvegicus phosducin-like 2 (Pdcl2), mRNA [XM_001076368]                                                                                                                 | <b>7,566</b> |
| LOC685685    | PREDICTED: Rattus norvegicus similar to S100 calcium-binding protein, ventral prostate (LOC685685), mRNA [XM_001064819]                                                                    | <b>7,565</b> |
| LOC689207    | PREDICTED: Rattus norvegicus similar to proteoglycan 4 (LOC689207), mRNA [XM_001069975]                                                                                                    | <b>7,565</b> |
| Emilin1      | Rattus norvegicus elastin microfibril interfacier 1 (Emilin1), mRNA [NM_001106710]                                                                                                         | <b>7,565</b> |
| 0            | Unknown                                                                                                                                                                                    | <b>7,565</b> |
| Angel2       | Rattus norvegicus angel homolog 2 (Drosophila) (Angel2), mRNA [NM_001135119]                                                                                                               | <b>7,564</b> |
| 0            | Unknown                                                                                                                                                                                    | <b>7,564</b> |
| Odf3b        | Rattus norvegicus outer dense fiber of sperm tails 3B (Odf3b), mRNA [NM_001191992]                                                                                                         | <b>7,563</b> |
| Pot1a        | Rattus norvegicus protection of telomeres 1A (Pot1a), mRNA [NM_001024322]                                                                                                                  | <b>7,563</b> |
| Nradd        | Rattus norvegicus neurotrophin receptor associated death domain (Nradd), mRNA [NM_139259]                                                                                                  | <b>7,563</b> |
| Slain2       | Rattus norvegicus SLAIN motif family, member 2 (Slain2), mRNA [NM_001107214]                                                                                                               | <b>7,563</b> |
| Grm6         | Rattus norvegicus glutamate receptor, metabotropic 6 (Grm6), mRNA [NM_022920]                                                                                                              | <b>7,563</b> |
| Paip2        | Rattus norvegicus poly(A) binding protein interacting protein 2 (Paip2), mRNA [NM_001014148]                                                                                               | <b>7,562</b> |
| C1qb         | Rattus norvegicus complement component 1, q subcomponent, B chain (C1qb), mRNA [NM_019262]                                                                                                 | <b>7,562</b> |
| Ctps2        | Rattus norvegicus CTP synthase II (Ctps2), mRNA [NM_001034998]                                                                                                                             | <b>7,561</b> |
| Cpt2         | Rattus norvegicus carnitine palmitoyltransferase 2 (Cpt2), nuclear gene encoding mitochondrial protein, mRNA [NM_012930]                                                                   | <b>7,561</b> |
| 0            | Unknown                                                                                                                                                                                    | <b>7,561</b> |
| 0            | Bromodomain and WD repeat domain containing 1 (Predicted), isoform CRA_bUncharacterized protein [Source:UniProtKB/TrEMBL;Acc:D3ZFG0] [ENSRNOT00000002231]                                  | <b>7,559</b> |
| 0            | BC043133 Cnot2 protein {Mus musculus} (exp=-1; wgp=0; cg=0), partial (14%) [TC583782]                                                                                                      | <b>7,558</b> |
| 0            | Unknown                                                                                                                                                                                    | <b>7,558</b> |

|            |                                                                                                                                                 |              |
|------------|-------------------------------------------------------------------------------------------------------------------------------------------------|--------------|
| Il23a      | Rattus norvegicus Interleukin 23, alpha subunit p19 (Il23a), mRNA [NM_130410]                                                                   | <b>7,554</b> |
| Arap2      | Rattus norvegicus ArfGAP with RhoGAP domain, ankyrin repeat and PH domain 2 (Arap2), mRNA [NM_001107216]                                        | <b>7,553</b> |
| Foxa1      | Rattus norvegicus forkhead box A1 (Foxa1), mRNA [NM_012742]                                                                                     | <b>7,551</b> |
| LOC316717  | PREDICTED: Rattus norvegicus protein serine-threonine phosphatase catalytic subunit PP-1c (LOC316717), miscRNA [XR_009632]                      | <b>7,551</b> |
| Rwdd4      | Rattus norvegicus RWD domain containing 4A (Rwdd4), mRNA [NM_001034994]                                                                         | <b>7,548</b> |
| 0          | Unknown                                                                                                                                         | <b>7,546</b> |
| 0          | Unknown                                                                                                                                         | <b>7,546</b> |
| Smarca4    | Rattus norvegicus SWI/SNF related, matrix associated, actin dependent regulator of chromatin, subfamily a, member 4 (Smarca4), mRNA [NM_134368] | <b>7,546</b> |
| Ube2a      | Rattus norvegicus ubiquitin-conjugating enzyme E2A (RAD6 homolog) (Ube2a), mRNA [NM_001013933]                                                  | <b>7,545</b> |
| Fam71e1    | Uncharacterized protein [Source:UniProtKB/TrEMBL;Acc:D4A176] [ENSRNOT00000043724]                                                               | <b>7,545</b> |
| Olr750     | Rattus norvegicus olfactory receptor 750 (Olr750), mRNA [NM_001000366]                                                                          | <b>7,544</b> |
| Mff        | Rattus norvegicus mitochondrial fission factor (Mff), nuclear gene encoding mitochondrial protein, mRNA [NM_001039015]                          | <b>7,543</b> |
| Ccng1      | Rattus norvegicus cyclin G1 (Ccng1), mRNA [NM_012923]                                                                                           | <b>7,543</b> |
| Gria2      | Rattus norvegicus glutamate receptor, ionotropic, AMPA 2 (Gria2), transcript variant 2, mRNA [NM_001083811]                                     | <b>7,542</b> |
| LOC686141  | PREDICTED: Rattus norvegicus similar to Spetex-2C protein (LOC686141), mRNA [XM_573722]                                                         | <b>7,542</b> |
| Tcfap4     | Rattus norvegicus transcription factor AP4 (Tcfap4), mRNA [NM_001108267]                                                                        | <b>7,541</b> |
| 0          | Rattus norvegicus similar to RIKEN cDNA 1700081O22 (LOC364963), mRNA [XM_344734]                                                                | <b>7,541</b> |
| Rhot1      | Rattus norvegicus ras homolog gene family, member T1 (Rhot1), mRNA [NM_001107026]                                                               | <b>7,541</b> |
| Crcp       | Rattus norvegicus CGRP receptor component (Crcp), mRNA [NM_053670]                                                                              | <b>7,540</b> |
| 0          | Uncharacterized protein [Source:UniProtKB/TrEMBL;Acc:D3ZY88] [ENSRNOT00000018184]                                                               | <b>7,539</b> |
| Nfatc2     | Rattus norvegicus nuclear factor of activated T-cells, cytoplasmic, calcineurin-dependent 2 (Nfatc2), mRNA [NM_001107805]                       | <b>7,538</b> |
| Acsl6      | Rattus norvegicus acyl-CoA synthetase long-chain family member 6 (Acsl6), mRNA [NM_130739]                                                      | <b>7,538</b> |
| Tspan13    | Rattus norvegicus tetraspanin 13 (Tspan13), mRNA [NM_001013244]                                                                                 | <b>7,537</b> |
| RGD1560972 | PREDICTED: Rattus norvegicus similar to putative protein kinase (RGD1560972), mRNA [XM_577704]                                                  | <b>7,537</b> |
| Vom2r72    | Rattus norvegicus vomeronasal 2 receptor, 72 (Vom2r72), mRNA [NM_001099517]                                                                     | <b>7,536</b> |
| Duxbl      | PREDICTED: Rattus norvegicus double homeobox B-like (Duxbl), mRNA [XM_001056985]                                                                | <b>7,536</b> |
| Tomm6      | PREDICTED: Rattus norvegicus translocase of outer mitochondrial membrane 6 homolog (yeast) (Tomm6), mRNA [XM_001060392]                         | <b>7,536</b> |
| LOC499234  | PREDICTED: Rattus norvegicus similar to NACHT, leucine rich repeat and PYD containing 14-like (LOC499234), partial mRNA [XM_002728785]          | <b>7,535</b> |
| Ufd1l      | Rattus norvegicus ubiquitin fusion degradation 1 like (yeast) (Ufd1l), mRNA [NM_053418]                                                         | <b>7,534</b> |
| LOC691781  | PREDICTED: Rattus norvegicus similar to Tubulin alpha-2 chain (Alpha-tubulin 2) (LOC691781), partial miscRNA [XR_086096]                        | <b>7,533</b> |
| Tjp2       | Rattus norvegicus tight junction protein 2 (Tjp2), mRNA [NM_053773]                                                                             | <b>7,532</b> |
| Ang1       | Rattus norvegicus angiogenin, ribonuclease A family, member 1 (Ang1), mRNA [NM_001006992]                                                       | <b>7,532</b> |
| Mif        | MIF=macrophage migration inhibitory factor [rats, liver, mRNA, 525 nt]. [S73424]                                                                | <b>7,531</b> |

|            |                                                                                                                                         |       |
|------------|-----------------------------------------------------------------------------------------------------------------------------------------|-------|
| Slc25a27   | Rattus norvegicus solute carrier family 25, member 27 (Slc25a27), nuclear gene encoding mitochondrial protein, mRNA [NM_053500]         | 7,531 |
| Wnk3       | Rattus norvegicus WNK lysine deficient protein kinase 3 (Wnk3), mRNA [NM_001163607]                                                     | 7,530 |
| Olr128     | Rattus norvegicus olfactory receptor 128 (Olr128), mRNA [NM_001000159]                                                                  | 7,530 |
| 0          | Uncharacterized protein [Source:UniProtKB/TrEMBL;Acc:D3ZQ22] [ENSRNOT00000048946]                                                       | 7,530 |
| Rad51      | Rattus norvegicus RAD51 homolog (RecA homolog, E. coli) (S. cerevisiae) (Rad51), mRNA [NM_001109204]                                    | 7,530 |
| Gopc       | Rattus norvegicus golgi associated PDZ and coiled-coil motif containing (Gopc), mRNA [NM_001107631]                                     | 7,529 |
| Wtap       | Rattus norvegicus Wilms tumor 1 associated protein (Wtap), transcript variant 2, mRNA [NM_001113543]                                    | 7,529 |
| Casp8ap2   | Rattus norvegicus caspase 8 associated protein 2 (Casp8ap2), mRNA [NM_001107921]                                                        | 7,527 |
| Slc25a16   | Rat mitochondrial solute carrier protein mRNA, 5' end. [M32973]                                                                         | 7,524 |
| Zmynd17    | Rattus norvegicus zinc finger, MYND-type containing 17 (Zmynd17), mRNA [NM_001106025]                                                   | 7,524 |
| Asb1       | Rattus norvegicus ankyrin repeat and SOCS box-containing 1 (Asb1), mRNA [NM_001108232]                                                  | 7,524 |
| Calml4     | Rattus norvegicus calmodulin-like 4 (Calml4), mRNA [NM_001127575]                                                                       | 7,524 |
| 0          | Unknown                                                                                                                                 | 7,523 |
| Sgcb       | Rattus norvegicus sarcoglycan, beta (dystrophin-associated glycoprotein) (Sgcb), mRNA [NM_001191068]                                    | 7,523 |
| Cxcl12     | Rattus norvegicus chemokine (C-X-C motif) ligand 12 (stromal cell-derived factor 1) (Cxcl12), transcript variant 3, mRNA [NM_001033883] | 7,522 |
| Slc46a1    | Rattus norvegicus solute carrier family 46 (folate transporter), member 1 (Slc46a1), mRNA [NM_001013969]                                | 7,521 |
| Oat        | Rattus norvegicus ornithine aminotransferase (gyrate atrophy) (Oat), nuclear gene encoding mitochondrial protein, mRNA [NM_022521]      | 7,519 |
| Lpin3      | Rattus norvegicus lipin 3 (Lpin3), mRNA [NM_001014184]                                                                                  | 7,519 |
| Ptpu       | Rattus norvegicus protein tyrosine phosphatase, receptor type, U (Ptpu), mRNA [NM_001191575]                                            | 7,519 |
| Tmlhe      | Rattus norvegicus trimethyllysine hydroxylase, epsilon (Tmlhe), nuclear gene encoding mitochondrial protein, mRNA [NM_133387]           | 7,519 |
| Fxyd3      | Rattus norvegicus FXYD domain-containing ion transport regulator 3 (Fxyd3), mRNA [NM_172317]                                            | 7,516 |
| Fam82a2    | Rattus norvegicus family with sequence similarity 82, member A2 (Fam82a2), mRNA [NM_001014046]                                          | 7,516 |
| 0          | PREDICTED: Rattus norvegicus similar to spermatogenesis associated glutamate (E)-rich protein 4d (LOC363324), mRNA [XM_343663]          | 7,516 |
| Lhx3       | LIM homeodomain protein 3b [Source:UniProtKB/TrEMBL;Acc:Q91ZX3] [ENSRNOT00000025047]                                                    | 7,515 |
| Olr162     | Rattus norvegicus olfactory receptor 162 (Olr162), mRNA [NM_001000950]                                                                  | 7,514 |
| Egr3       | Rattus norvegicus early growth response 3 (Egr3), mRNA [NM_017086]                                                                      | 7,513 |
| Fam176a    | Rattus norvegicus family with sequence similarity 176, member A (Fam176a), mRNA [NM_001109243]                                          | 7,512 |
| Zpbp2      | Rattus norvegicus zona pellucida binding protein 2 (Zpbp2), mRNA [NM_001007011]                                                         | 7,509 |
| Pxmp2      | Rattus norvegicus peroxisomal membrane protein 2 (Pxmp2), mRNA [NM_031587]                                                              | 7,508 |
| Actl6b     | Rattus norvegicus actin-like 6B (Actl6b), mRNA [NM_001105917]                                                                           | 7,507 |
| Prkra      | Rattus norvegicus protein kinase, interferon inducible double stranded RNA dependent activator (Prkra), mRNA [NM_001024780]             | 7,506 |
| Fzd8       | Rattus norvegicus frizzled homolog 8 (Drosophila) (Fzd8), mRNA [NM_001044251]                                                           | 7,506 |
| RGD1564456 | PREDICTED: Rattus norvegicus similar to chromosome 10 open reading frame 18 (RGD1564456), mRNA [XM_001068906]                           | 7,504 |
| Gmcl1      | Rattus norvegicus germ cell-less homolog 1 (Drosophila) (Gmcl1), transcript variant 1, mRNA [NM_001033931]                              | 7,504 |

|            |                                                                                                                                                                                       |       |
|------------|---------------------------------------------------------------------------------------------------------------------------------------------------------------------------------------|-------|
| 0          | Unknown                                                                                                                                                                               | 7,504 |
| LOC682660  | PREDICTED: Rattus norvegicus similar to LanC lantibiotic synthetase component C-like 3 (LOC682660), mRNA [XM_001062515]                                                               | 7,503 |
| 0          | Q86YD5_HUMAN (Q86YD5) LOC143458 protein (Fragment), partial (31%) [TC642266]                                                                                                          | 7,503 |
| Tmem219    | PREDICTED: Rattus norvegicus transmembrane protein 219 (Tmem219), mRNA [XM_001080074]                                                                                                 | 7,501 |
| Thap1      | Rattus norvegicus THAP domain containing, apoptosis associated protein 1 (Thap1), mRNA [NM_001008340]                                                                                 | 7,500 |
| Ppp3ca     | Rattus norvegicus protein phosphatase 3, catalytic subunit, alpha isoform (Ppp3ca), mRNA [NM_017041]                                                                                  | 7,500 |
| Asna1      | Rattus norvegicus arsA arsenite transporter, ATP-binding, homolog 1 (bacterial) (Asna1), mRNA [NM_001100505]                                                                          | 7,499 |
| Urg4       | Rattus norvegicus up-regulated gene 4 (Urg4), nuclear gene encoding mitochondrial protein, mRNA [NM_001077660]                                                                        | 7,498 |
| Mapkapk3   | Rattus norvegicus mitogen-activated protein kinase-activated protein kinase 3 (Mapkapk3), mRNA [NM_001012127]                                                                         | 7,497 |
| Cirbp      | Rattus norvegicus cold inducible RNA binding protein (Cirbp), mRNA [NM_031147]                                                                                                        | 7,497 |
| Znf512b    | Rattus norvegicus zinc finger protein 512B (Znf512b), mRNA [NM_001107809]                                                                                                             | 7,496 |
| Nkap       | Rattus norvegicus NFkB activating protein (Nkap), mRNA [NM_001024872]                                                                                                                 | 7,495 |
| RGD1566386 | Rattus norvegicus similar to Hypothetical protein A430033K04 (RGD1566386), mRNA [NM_001107127]                                                                                        | 7,495 |
| Nkd2       | Rattus norvegicus naked cuticle homolog 2 (Drosophila) (Nkd2), mRNA [NM_001107454]                                                                                                    | 7,492 |
| Dynlt3     | Rattus norvegicus dynein light chain Tctex-type 3 (Dynlt3), mRNA [NM_001013228]                                                                                                       | 7,491 |
| LOC300314  | PREDICTED: Rattus norvegicus similar to Protein KIAA0196 (LOC300314), mRNA [XM_238532]                                                                                                | 7,489 |
| Atp5s      | Rattus norvegicus ATP synthase, H <sup>+</sup> transporting, mitochondrial F0 complex, subunit s (factor B) (Atp5s), nuclear gene encoding mitochondrial protein, mRNA [NM_001007749] | 7,489 |
| Rgs12      | Rattus norvegicus regulator of G-protein signaling 12 (Rgs12), mRNA [NM_019339]                                                                                                       | 7,489 |
| 0          | Unknown                                                                                                                                                                               | 7,488 |
| Insm1      | PREDICTED: Rattus norvegicus insulinoma-associated 1 (Insm1), mRNA [XM_001055419]                                                                                                     | 7,488 |
| 0          | Uncharacterized protein [Source:UniProtKB/TrEMBL;Acc:D3ZQC4] [ENSRNOT00000050888]                                                                                                     | 7,487 |
| Poldip2    | Rattus norvegicus polymerase (DNA-directed), delta interacting protein 2 (Poldip2), mRNA [NM_001105816]                                                                               | 7,486 |
| Hsp90ab1   | Heat shock protein HSP 90-beta [Source:UniProtKB/Swiss-Prot;Acc:P34058] [ENSRNOT00000026920]                                                                                          | 7,485 |
| Trub2      | Rattus norvegicus TruB pseudouridine (psi) synthase homolog 2 (E. coli) (Trub2), mRNA [NM_001014257]                                                                                  | 7,484 |
| Unc5b      | Rattus norvegicus unc-5 homolog B (C. elegans) (Unc5b), mRNA [NM_022207]                                                                                                              | 7,484 |
| Gpr172a    | Rattus norvegicus G protein-coupled receptor 172A (Gpr172a), mRNA [NM_001109670]                                                                                                      | 7,484 |
| Hamp       | Rattus norvegicus hepcidin antimicrobial peptide (Hamp), mRNA [NM_053469]                                                                                                             | 7,484 |
| Parg       | Rattus norvegicus poly (ADP-ribose) glycohydrolase (Parg), mRNA [NM_031339]                                                                                                           | 7,483 |
| LOC685792  | PREDICTED: Rattus norvegicus similar to Discs large homolog 5 (Placenta and prostate DLG) (Discs large protein P-dlg) (LOC685792), mRNA [XM_217497]                                   | 7,482 |
| 0          | Unknown                                                                                                                                                                               | 7,480 |
| 0          | Uncharacterized protein [Source:UniProtKB/TrEMBL;Acc:D3ZJM8] [ENSRNOT00000061644]                                                                                                     | 7,480 |
| Wnt3       | Rattus norvegicus wingless-type MMTV integration site family, member 3 (Wnt3), mRNA [NM_001105715]                                                                                    | 7,479 |

|              |                                                                                                                                                                                       |              |
|--------------|---------------------------------------------------------------------------------------------------------------------------------------------------------------------------------------|--------------|
| Acaca        | Rattus norvegicus acetyl-coenzyme A carboxylase alpha (Acaca), mRNA [NM_022193]                                                                                                       | <b>7,479</b> |
| RGD1562608   | Rattus norvegicus similar to KIAA1328 protein (RGD1562608), mRNA [NM_001134607]                                                                                                       | <b>7,478</b> |
| Smcr7        | PREDICTED: Rattus norvegicus Smith-Magenis syndrome chromosome region, candidate 7 homolog (human) (Smcr7), mRNA [XM_001077609]                                                       | <b>7,478</b> |
| 0            | Unknown                                                                                                                                                                               | <b>7,477</b> |
| RGD1566047   | PREDICTED: Rattus norvegicus similar to MAP/microtubule affinity-regulating kinase 4 (MAP/microtubule affinity-regulating kinase like 1) (RGD1566047), mRNA [XM_574062]               | <b>7,475</b> |
| Pla2g2f      | Rattus norvegicus phospholipase A2, group IIF (Pla2g2f), mRNA [NM_001109587]                                                                                                          | <b>7,475</b> |
| Ubac1        | Rattus norvegicus UBA domain containing 1 (Ubac1), mRNA [NM_001007742]                                                                                                                | <b>7,475</b> |
| Tmtc2        | Rattus norvegicus transmembrane and tetratricopeptide repeat containing 2 (Tmtc2), mRNA [NM_001171177]                                                                                | <b>7,474</b> |
| Tyms         | Rattus norvegicus thymidylate synthetase (Tyms), mRNA [NM_019179]                                                                                                                     | <b>7,473</b> |
| Chad         | Rattus norvegicus chondroadherin (Chad), mRNA [NM_019164]                                                                                                                             | <b>7,473</b> |
| Pts          | Rattus norvegicus 6-pyruvoyl-tetrahydropterin synthase (Pts), mRNA [NM_017220]                                                                                                        | <b>7,472</b> |
| Rgc32        | Rattus norvegicus response gene to complement 32 (Rgc32), mRNA [NM_054008]                                                                                                            | <b>7,470</b> |
| Wdr86        | Rattus norvegicus WD repeat domain 86 (Wdr86), mRNA [NM_001110489]                                                                                                                    | <b>7,470</b> |
| Msh4         | Rattus norvegicus mutS homolog 4 (E. coli) (Msh4), mRNA [NM_001106477]                                                                                                                | <b>7,469</b> |
| Kcna7        | Rattus norvegicus potassium voltage-gated channel, shaker-related subfamily, member 7 (Kcna7), mRNA [NM_001108914]                                                                    | <b>7,469</b> |
| 0            | TBC1 domain family, member 23 (Predicted), isoform CRA_cUncharacterized protein [Source:UniProtKB/TrEMBL;Acc:D4A0K5] [ENSRNOT00000002240]                                             | <b>7,468</b> |
| Tmbim6       | Rattus norvegicus transmembrane BAX inhibitor motif containing 6 (Tmbim6), mRNA [NM_019381]                                                                                           | <b>7,466</b> |
| Atp5g2       | Rattus norvegicus ATP synthase, H <sup>+</sup> transporting, mitochondrial F0 complex, subunit C2 (subunit 9) (Atp5g2), nuclear gene encoding mitochondrial protein, mRNA [NM_133556] | <b>7,466</b> |
| Styk1        | Similar to NOK kinase (Predicted)Uncharacterized protein [Source:UniProtKB/TrEMBL;Acc:D3ZHY0] [ENSRNOT00000013833]                                                                    | <b>7,466</b> |
| Fam65c       | Uncharacterized protein [Source:UniProtKB/TrEMBL;Acc:D3ZX40] [ENSRNOT00000035463]                                                                                                     | <b>7,464</b> |
| 0            | Uncharacterized protein [Source:UniProtKB/TrEMBL;Acc:D3ZE96] [ENSRNOT00000005587]                                                                                                     | <b>7,464</b> |
| Col22a1      | PREDICTED: Rattus norvegicus collagen, type XXII, alpha 1 (Col22a1), mRNA [XM_243609]                                                                                                 | <b>7,463</b> |
| RGD1308544   | PREDICTED: Rattus norvegicus LOC361192 (RGD1308544), mRNA [XM_001063171]                                                                                                              | <b>7,462</b> |
| Tmem17       | Rattus norvegicus transmembrane protein 17 (Tmem17), mRNA [NM_001010961]                                                                                                              | <b>7,460</b> |
| Slc2a3       | Rattus norvegicus solute carrier family 2 (facilitated glucose transporter), member 3 (Slc2a3), mRNA [NM_017102]                                                                      | <b>7,459</b> |
| Lcn12        | Rattus norvegicus lipocalin 12 (Lcn12), mRNA [NM_001128138]                                                                                                                           | <b>7,459</b> |
| Rpl6         | Rattus norvegicus ribosomal protein L6 (Rpl6), mRNA [NM_053971]                                                                                                                       | <b>7,458</b> |
| RGD1304693   | Rattus norvegicus similar to CG14803-PA (RGD1304693), mRNA [NM_001135780]                                                                                                             | <b>7,455</b> |
| 0            | Uncharacterized protein [Source:UniProtKB/TrEMBL;Acc:D3ZQ32] [ENSRNOT00000039210]                                                                                                     | <b>7,453</b> |
| LOC100366030 | Rattus norvegicus rCG37858-like (LOC100366030), mRNA [NM_001177909]                                                                                                                   | <b>7,452</b> |
| Foxj1        | Rattus norvegicus forkhead box J1 (Foxj1), mRNA [NM_053832]                                                                                                                           | <b>7,452</b> |

|            |                                                                                                                                                        |       |
|------------|--------------------------------------------------------------------------------------------------------------------------------------------------------|-------|
| Clip4      | Rattus norvegicus CAP-GLY domain containing linker protein family, member 4 (Clip4), mRNA [NM_001013942]                                               | 7,452 |
| RGD1303142 | Rattus norvegicus oxidative stress responsive gene (RGD1303142), mRNA [NM_201560]                                                                      | 7,452 |
| 0          | Unknown                                                                                                                                                | 7,451 |
| Ern1       | Rattus norvegicus endoplasmic reticulum to nucleus signaling 1 (Ern1), mRNA [NM_001191926]                                                             | 7,450 |
| 0          | Unknown                                                                                                                                                | 7,450 |
| LOC687346  | PREDICTED: Rattus norvegicus similar to BRCA1-associated protein (BRAP2) (Impedes mitogenic signal propagation) (IMP) (LOC687346), mRNA [XM_001075972] | 7,448 |
| Myo18a     | Rattus norvegicus myosin XVIIIa (Myo18a), mRNA [NM_001172137]                                                                                          | 7,447 |
| Cuta       | Rattus norvegicus cutA divalent cation tolerance homolog (E. coli) (Cuta), transcript variant 1, mRNA [NM_212494]                                      | 7,447 |
| Nme6       | Rattus norvegicus non-metastatic cells 6, protein expressed in (nucleoside-diphosphate kinase) (Nme6), mRNA [NM_001191884]                             | 7,446 |
| 0          | Rattus norvegicus similar to NOL1R protein; Williams-Beuren syndrome critical region protein 20 (LOC305339), mRNA [XM_223400]                          | 7,445 |
| Mre11a     | Rattus norvegicus MRE11 meiotic recombination 11 homolog A (S. cerevisiae) (Mre11a), mRNA [NM_022279]                                                  | 7,445 |
| 0          | Unknown                                                                                                                                                | 7,445 |
| 0          | Uncharacterized protein [Source:UniProtKB/TrEMBL;Acc:D3Z932] [ENSRNOT00000066351]                                                                      | 7,444 |
| Baz1b      | Rattus norvegicus bromodomain adjacent to zinc finger domain, 1B (Baz1b), mRNA [NM_001191916]                                                          | 7,443 |
| Cdon       | Rattus norvegicus Cdon homolog (mouse) (Cdon), mRNA [NM_017358]                                                                                        | 7,442 |
| Mrpl48     | Rattus norvegicus mitochondrial ribosomal protein L48 (Mrpl48), nuclear gene encoding mitochondrial protein, mRNA [NM_001106282]                       | 7,442 |
| Ccdc104    | Rattus norvegicus coiled-coil domain containing 104 (Ccdc104), mRNA [NM_001024866]                                                                     | 7,441 |
| Lyz2       | Rattus norvegicus lysozyme 2 (Lyz2), mRNA [NM_012771]                                                                                                  | 7,441 |
| Hsd17b12   | Rattus norvegicus hydroxysteroid (17-beta) dehydrogenase 12 (Hsd17b12), mRNA [NM_032066]                                                               | 7,441 |
| Bex2       | Rattus norvegicus brain expressed X-linked 2 (Bex2), mRNA [NM_001077435]                                                                               | 7,440 |
| Grk5       | Rattus norvegicus G protein-coupled receptor kinase 5 (Grk5), mRNA [NM_030829]                                                                         | 7,438 |
| RGD1565566 | PREDICTED: Rattus norvegicus similar to 60S ribosomal protein L18a (RGD1565566), mRNA [XM_574336]                                                      | 7,435 |
| 0          | Uncharacterized protein [Source:UniProtKB/TrEMBL;Acc:D4A910] [ENSRNOT00000035986]                                                                      | 7,434 |
| Aspdh      | Rattus norvegicus aspartate dehydrogenase domain containing (Aspdh), mRNA [NM_001009643]                                                               | 7,434 |
| Tmem48     | Rattus norvegicus transmembrane protein 48 (Tmem48), mRNA [NM_001025023]                                                                               | 7,434 |
| Bmp2k      | Uncharacterized protein [Source:UniProtKB/TrEMBL;Acc:D4A0Z6] [ENSRNOT00000060868]                                                                      | 7,433 |
| Pgrmc1     | Rattus norvegicus progesterone receptor membrane component 1 (Pgrmc1), mRNA [NM_021766]                                                                | 7,432 |
| Stim2      | Rattus norvegicus stromal interaction molecule 2 (Stim2), mRNA [NM_001105750]                                                                          | 7,431 |
| Acvr2b     | Rattus norvegicus activin A receptor, type IIB (Acvr2b), mRNA [NM_031554]                                                                              | 7,430 |
| 0          | Unknown                                                                                                                                                | 7,429 |
| Stard8     | Rattus norvegicus StAR-related lipid transfer (START) domain containing 8 (Stard8), mRNA [NM_001107849]                                                | 7,428 |
| Rfx2       | Rattus norvegicus regulatory factor X, 2 (influences HLA class II expression) (Rfx2), mRNA [NM_001106877]                                              | 7,427 |
| Ckap2l     | Uncharacterized protein [Source:UniProtKB/TrEMBL;Acc:D3Z8Z9] [ENSRNOT00000039794]                                                                      | 7,427 |

|            |                                                                                                                                            |       |
|------------|--------------------------------------------------------------------------------------------------------------------------------------------|-------|
| Pop1       | Rattus norvegicus processing of precursor 1, ribonuclease P/MRP subunit ( <i>S. cerevisiae</i> ) (Pop1), mRNA [NM_001130550]               | 7,427 |
| Cct8       | Rattus norvegicus chaperonin containing Tcp1, subunit 8 (theta) (Cct8), mRNA [NM_001105897]                                                | 7,424 |
| RGD1562747 | Rattus norvegicus similar to RIKEN cDNA 1110012L19 (RGD1562747), mRNA [NM_001106212]                                                       | 7,423 |
| 0          | Unknown                                                                                                                                    | 7,421 |
| 0          | Unknown                                                                                                                                    | 7,420 |
| 0          | Unknown                                                                                                                                    | 7,420 |
| Cox6a1     | Rattus norvegicus cytochrome c oxidase, subunit VIa, polypeptide 1 (Cox6a1), nuclear gene encoding mitochondrial protein, mRNA [NM_012814] | 7,419 |
| RGD1308695 | Rattus norvegicus similar to RIKEN cDNA 1200016B10 (RGD1308695), mRNA [NM_001105960]                                                       | 7,417 |
| 0          | PREDICTED: Rattus norvegicus rCG41835-like (LOC100359996), mRNA [XM_002728584]                                                             | 7,416 |
| Tmco4      | Rattus norvegicus transmembrane and coiled-coil domains 4 (Tmco4), mRNA [NM_001034949]                                                     | 7,416 |
| Gdap1      | Rattus norvegicus ganglioside-induced differentiation-associated-protein 1 (Gdap1), mRNA [NM_001107897]                                    | 7,416 |
| Abcd3      | Rattus norvegicus ATP-binding cassette, subfamily D (ALD), member 3 (Abcd3), mRNA [NM_012804]                                              | 7,415 |
| Nefl       | Rattus norvegicus neurofilament, light polypeptide (Nefl), mRNA [NM_031783]                                                                | 7,414 |
| Lpar6      | Rattus norvegicus lysophosphatidic acid receptor 6 (Lpar6), mRNA [NM_001045843]                                                            | 7,414 |
| Vom1r38    | Rattus norvegicus vomeronasal 1 receptor 38 (Vom1r38), mRNA [NM_001008964]                                                                 | 7,413 |
| Bet1       | Rattus norvegicus blocked early in transport 1 homolog ( <i>S. cerevisiae</i> ) (Bet1), mRNA [NM_019251]                                   | 7,413 |
| Fam151a    | Rattus norvegicus family with sequence similarity 151, member A (Fam151a), mRNA [NM_001005558]                                             | 7,412 |
| Vegfa      | Rattus norvegicus vascular endothelial growth factor A (Vegfa), transcript variant 1, mRNA [NM_031836]                                     | 7,411 |
| Ppp1cb     | Rattus norvegicus protein phosphatase 1, catalytic subunit, beta isoform (Ppp1cb), mRNA [NM_013065]                                        | 7,411 |
| LOC689410  | PREDICTED: Rattus norvegicus hypothetical protein LOC689410 (LOC689410), mRNA [XM_001070689]                                               | 7,411 |
| lfitm7     | Uncharacterized protein [Source:UniProtKB/TrEMBL;Acc:D3ZY98] [ENSRNOT00000039434]                                                          | 7,409 |
| LOC685203  | Uncharacterized protein [Source:UniProtKB/TrEMBL;Acc:D3ZBW5] [ENSRNOT00000059159]                                                          | 7,409 |
| Lass6      | PREDICTED: Rattus norvegicus LAG1 homolog, ceramide synthase 6 (Lass6), mRNA [XM_001058317]                                                | 7,408 |
| Zcchc10    | Zinc finger CCHC domain-containing protein 10 [Source:UniProtKB/Swiss-Prot;Acc:Q5EB97] [ENSRNOT00000009098]                                | 7,406 |
| 0          | Unknown                                                                                                                                    | 7,406 |
| Nxf1       | Rattus norvegicus nuclear RNA export factor 1 (Nxf1), mRNA [NM_021579]                                                                     | 7,405 |
| 0          | Unknown                                                                                                                                    | 7,403 |
| RGD1308722 | Rattus norvegicus similar to RIKEN cDNA A130042E20; open reading frame 57 (RGD1308722), mRNA [NM_001108529]                                | 7,402 |
| Nr1h5p     | Uncharacterized protein [Source:UniProtKB/TrEMBL;Acc:D3ZFA7] [ENSRNOT00000036229]                                                          | 7,402 |
| Gp5        | Rattus norvegicus glycoprotein V (platelet) (Gp5), mRNA [NM_012795]                                                                        | 7,400 |
| Rps8       | Rattus norvegicus ribosomal protein S8 (Rps8), mRNA [NM_031706]                                                                            | 7,399 |
| Ndc80      | Rattus norvegicus NDC80 homolog, kinetochore complex component ( <i>S. cerevisiae</i> ) (Ndc80), mRNA [NM_001126270]                       | 7,397 |
| Pif1       | Rattus norvegicus Pif1/Rrm3 DNA-helicase-like protein (Pif1), mRNA [NM_001044253]                                                          | 7,396 |
| 0          | Unknown                                                                                                                                    | 7,396 |

|         |                                                                                                                                                                                   |       |
|---------|-----------------------------------------------------------------------------------------------------------------------------------------------------------------------------------|-------|
| 0       | Unknown                                                                                                                                                                           | 7,396 |
| Tspo    | Rattus norvegicus translocator protein (Tspo), mRNA [NM_012515]                                                                                                                   | 7,396 |
| Mtmr4   | Rattus norvegicus myotubularin related protein 4 (Mtmr4), mRNA [NM_001105827]                                                                                                     | 7,395 |
| Pnma3   | Rattus norvegicus paraneoplastic antigen MA3 (Pnma3), mRNA [NM_001106342]                                                                                                         | 7,394 |
| Clcn1   | Rattus norvegicus chloride channel 1 (Clcn1), mRNA [NM_013147]                                                                                                                    | 7,394 |
| Yipf4   | Rattus norvegicus Yip1 domain family, member 4 (Yipf4), mRNA [NM_001009712]                                                                                                       | 7,393 |
| Nthl1   | Rattus norvegicus nth (endonuclease III)-like 1 (E.coli) (Nthl1), mRNA [NM_001105728]                                                                                             | 7,392 |
| Thumpd1 | Rattus norvegicus THUMP domain containing 1 (Thumpd1), mRNA [NM_001009688]                                                                                                        | 7,391 |
| Gtpbp6  | Rattus norvegicus GTP binding protein 6 (putative) (Gtpbp6), mRNA [NM_001135840]                                                                                                  | 7,390 |
| Cpsf6   | Rattus norvegicus cleavage and polyadenylation specific factor 6 (Cpsf6), mRNA [NM_001106785]                                                                                     | 7,390 |
| Itm2a   | Rattus norvegicus integral membrane protein 2A (Itm2a), mRNA [NM_001025712]                                                                                                       | 7,389 |
| Tmem168 | Rattus norvegicus transmembrane protein 168 (Tmem168), mRNA [NM_001014054]                                                                                                        | 7,388 |
| 0       | Uncharacterized protein [Source:UniProtKB/TrEMBL;Acc:D4ACK9] [ENSRNOT00000019278]                                                                                                 | 7,388 |
| Gh1     | Rattus norvegicus growth hormone 1 (Gh1), mRNA [NM_001034848]                                                                                                                     | 7,388 |
| Dbnl    | Drebrin-like protein [Source:UniProtKB/Swiss-Prot;Acc:Q9JHL4] [ENSRNOT00000017375]                                                                                                | 7,386 |
| Rps6kb1 | Rattus norvegicus ribosomal protein S6 kinase, polypeptide 1 (Rps6kb1), mRNA [NM_031985]                                                                                          | 7,386 |
| 0       | Rattus norvegicus TL0AEA9YM10 mRNA sequence. [FQ230244]                                                                                                                           | 7,385 |
| Myo9b   | Rattus norvegicus myosin IXb (Myo9b), mRNA [NM_012984]                                                                                                                            | 7,384 |
| 0       | Histone H3.1 [Source:UniProtKB/Swiss-Prot;Acc:Q6LED0] [ENSRNOT00000059330]                                                                                                        | 7,382 |
| Mrps35  | Rattus norvegicus mitochondrial ribosomal protein S35 (Mrps35), nuclear gene encoding mitochondrial protein, mRNA [NM_001106628]                                                  | 7,382 |
| Ucn2    | Rattus norvegicus urocortin 2 (Ucn2), mRNA [NM_133385]                                                                                                                            | 7,381 |
| 0       | Uncharacterized protein [Source:UniProtKB/TrEMBL;Acc:D4A8N4] [ENSRNOT00000004178]                                                                                                 | 7,381 |
| 0       | Uncharacterized protein [Source:UniProtKB/TrEMBL;Acc:D4A1J6] [ENSRNOT00000021816]                                                                                                 | 7,380 |
| Msl1    | Rattus norvegicus male-specific lethal 1 homolog (Drosophila) (Msl1), mRNA [NM_001107048]                                                                                         | 7,380 |
| 0       | Solute carrier family 37 (Glycerol-3-phosphate transporter), member 3 (Predicted), isoform CRA_cUncharacterized protein [Source:UniProtKB/TrEMBL;Acc:D3ZZN8] [ENSRNOT00000011915] | 7,379 |
| 0       | microtubule-actin crosslinking factor 1 [Source:RefSeq peptide;Acc:NP_001129230] [ENSRNOT00000021951]                                                                             | 7,377 |
| Olr321  | Rattus norvegicus olfactory receptor 321 (Olr321), mRNA [NM_001000244]                                                                                                            | 7,377 |
| Gsr     | Rattus norvegicus glutathione reductase (Gsr), mRNA [NM_053906]                                                                                                                   | 7,375 |
| 0       | UI-R-EB1-clg-p-22-0-UI.s1 UI-R-EB1 Rattus norvegicus cDNA clone UI-R-EB1-clg-p-22-0-UI 3', mRNA sequence [BQ202508]                                                               | 7,375 |
| 0       | Unknown                                                                                                                                                                           | 7,375 |
| 0       | AMGNNUC:NRHY7-00027-F7-A nrhy7 (10850) Rattus norvegicus cDNA clone nrhy7-00027-f7 5', mRNA sequence [CB546704]                                                                   | 7,374 |
| 0       | Unknown                                                                                                                                                                           | 7,374 |
| Ttc8    | Rattus norvegicus tetratricopeptide repeat domain 8 (Ttc8), mRNA [NM_001106752]                                                                                                   | 7,372 |



|            |                                                                                                                                                                  |              |
|------------|------------------------------------------------------------------------------------------------------------------------------------------------------------------|--------------|
| Uqcr11     | Rattus norvegicus ubiquinol-cytochrome c reductase, complex III subunit XI (Uqcr11), nuclear gene encoding mitochondrial protein, mRNA [NM_001126097]            | <b>7,370</b> |
| 0          | Unknown                                                                                                                                                          | <b>7,367</b> |
| Il18bp     | Rattus norvegicus interleukin 18 binding protein (Il18bp), mRNA [NM_053374]                                                                                      | <b>7,367</b> |
| Necab2     | Rattus norvegicus N-terminal EF-hand calcium binding protein 2 (Necab2), mRNA [NM_133415]                                                                        | <b>7,367</b> |
| Tbc1d8     | Rattus norvegicus TBC1 domain family, member 8 (Tbc1d8), mRNA [NM_001191067]                                                                                     | <b>7,367</b> |
| Znf691     | Rattus norvegicus zinc finger protein 691 (Znf691), mRNA [NM_001107968]                                                                                          | <b>7,366</b> |
| LOC682058  | PREDICTED: Rattus norvegicus similar to nucleolar protein with MIF4G domain 1 (LOC682058), mRNA [XM_001059617]                                                   | <b>7,363</b> |
| 0          | Unknown                                                                                                                                                          | <b>7,363</b> |
| LOC499770  | Rattus norvegicus similar to LOC495800 protein (LOC499770), mRNA [NM_001047110]                                                                                  | <b>7,363</b> |
| Crabp2     | Rattus norvegicus cellular retinoic acid binding protein 2 (Crabp2), mRNA [NM_017244]                                                                            | <b>7,362</b> |
| 0          | Unknown                                                                                                                                                          | <b>7,360</b> |
| Exoc2      | Rattus norvegicus exocyst complex component 2 (Exoc2), mRNA [NM_134414]                                                                                          | <b>7,360</b> |
| 0          | Uncharacterized protein [Source:UniProtKB/TrEMBL;Acc:D3ZZF2] [ENSRNOT0000005894]                                                                                 | <b>7,359</b> |
| RGD1305645 | Uncharacterized protein [Source:UniProtKB/TrEMBL;Acc:D4A540] [ENSRNOT00000036990]                                                                                | <b>7,359</b> |
| Mgat4a     | Rattus norvegicus mannosyl (alpha-1,3-)-glycoprotein beta-1,4-N-acetylglucosaminyltransferase, isozyme A (Mgat4a), transcript variant 1, mRNA [NM_001160155]     | <b>7,359</b> |
| 0          | Uncharacterized protein [Source:UniProtKB/TrEMBL;Acc:D4ACU3] [ENSRNOT00000060466]                                                                                | <b>7,358</b> |
| Spryd4     | Rattus norvegicus SPRY domain containing 4 (Spryd4), mRNA [NM_001037765]                                                                                         | <b>7,357</b> |
| Ap4s1      | Rattus norvegicus adaptor-related protein complex AP-4, sigma 1 (Ap4s1), mRNA [NM_001130999]                                                                     | <b>7,357</b> |
| Nab1       | Rattus norvegicus Ngfi-A binding protein 1 (Nab1), mRNA [NM_022856]                                                                                              | <b>7,357</b> |
| Grin1a     | Rattus norvegicus glutamate receptor, ionotropic, N-methyl D-aspartate-like 1A (Grin1a), mRNA [NM_183402]                                                        | <b>7,357</b> |
| LOC683077  | Rattus norvegicus similar to praja1, RING-H2 motif containing (LOC683077), mRNA [NM_001101006]                                                                   | <b>7,355</b> |
| Rps15      | Rattus norvegicus ribosomal protein S15 (Rps15), mRNA [NM_017151]                                                                                                | <b>7,354</b> |
| Aarsd1     | Rattus norvegicus alanyl-tRNA synthetase domain containing 1 (Aarsd1), mRNA [NM_001034109]                                                                       | <b>7,354</b> |
| Ndufaf4    | Rattus norvegicus NADH dehydrogenase (ubiquinone) 1 alpha subcomplex, assembly factor 4 (Ndufaf4), nuclear gene encoding mitochondrial protein, mRNA [NM_198783] | <b>7,353</b> |
| RGD1309058 | RCG20883Uncharacterized protein [Source:UniProtKB/TrEMBL;Acc:D4A7T7] [ENSRNOT00000014814]                                                                        | <b>7,352</b> |
| L3mbtl2    | Rattus norvegicus l(3)mbt-like 2 (Drosophila) (L3mbtl2), mRNA [NM_001033695]                                                                                     | <b>7,350</b> |
| Mizf       | PREDICTED: Rattus norvegicus MBD2-interacting zinc finger (Mizf), mRNA [XM_002727050]                                                                            | <b>7,349</b> |
| 0          | Uncharacterized protein [Source:UniProtKB/TrEMBL;Acc:D3ZV19] [ENSRNOT00000009759]                                                                                | <b>7,349</b> |
| 0          | Unknown                                                                                                                                                          | <b>7,347</b> |
| 0          | Unknown                                                                                                                                                          | <b>7,347</b> |
| LOC60591   | Rattus norvegicus calcium-activated potassium channel beta subunit (LOC60591), mRNA [NM_022203]                                                                  | <b>7,345</b> |

|              |                                                                                                                                                           |              |
|--------------|-----------------------------------------------------------------------------------------------------------------------------------------------------------|--------------|
| Cep152       | PREDICTED: Rattus norvegicus centrosomal protein 152 (Cep152), mRNA [XM_002726171]                                                                        | <b>7,345</b> |
| Micalcl      | Rattus norvegicus MICAL C-terminal like (Micalcl), mRNA [NM_182669]                                                                                       | <b>7,344</b> |
| Slc2a8       | Rattus norvegicus solute carrier family 2, (facilitated glucose transporter) member 8 (Slc2a8), mRNA [NM_053494]                                          | <b>7,343</b> |
| RGD1311558   | Rattus norvegicus similar to 4930506M07Rik protein (RGD1311558), mRNA [NM_001079705]                                                                      | <b>7,342</b> |
| RGD1566099   | Rattus norvegicus similar to novel protein (RGD1566099), mRNA [NM_001108347]                                                                              | <b>7,342</b> |
| LOC680155    | Uncharacterized protein [Source:UniProtKB/TrEMBL;Acc:D3ZXU7] [ENSRNOT00000020271]                                                                         | <b>7,340</b> |
| RGD1564571   | PREDICTED: Rattus norvegicus similar to DC-SIGN (RGD1564571), mRNA [XM_221808]                                                                            | <b>7,338</b> |
| Grin1a       | Rattus norvegicus glutamate receptor, ionotropic, N-methyl D-aspartate-like 1A (Grin1a), mRNA [NM_183402]                                                 | <b>7,338</b> |
| RGD1563046   | Rattus norvegicus similar to cerberus-like (RGD1563046), mRNA [NM_001115031]                                                                              | <b>7,337</b> |
| Gnb5         | Rattus norvegicus guanine nucleotide binding protein (G protein), beta 5 (Gnb5), mRNA [NM_031770]                                                         | <b>7,337</b> |
| Rnf217       | Rattus norvegicus ring finger protein 217 (Rnf217), mRNA [NM_001106204]                                                                                   | <b>7,337</b> |
| LOC501312    | PREDICTED: Rattus norvegicus hypothetical gene supported by BC082068 (LOC501312), mRNA [XM_576725]                                                        | <b>7,336</b> |
| Ctbp1        | Rattus norvegicus C-terminal binding protein 1 (Ctbp1), mRNA [NM_019201]                                                                                  | <b>7,336</b> |
| RGD1563833   | PREDICTED: Rattus norvegicus similar to putative homeobox protein (RGD1563833), mRNA [XM_577929]                                                          | <b>7,336</b> |
| 0            | PREDICTED: Rattus norvegicus ubiquitination factor E4B (Ube4b), mRNA [XM_233679]                                                                          | <b>7,335</b> |
| Prkcd        | Rattus norvegicus protein kinase C, delta (Prkcd), mRNA [NM_133307]                                                                                       | <b>7,334</b> |
| Olr323       | Rattus norvegicus olfactory receptor 323 (Olr323), mRNA [NM_001000245]                                                                                    | <b>7,334</b> |
| 0            | Uncharacterized protein [Source:UniProtKB/TrEMBL;Acc:D3ZTN0] [ENSRNOT00000035247]                                                                         | <b>7,334</b> |
| LOC100360108 | PREDICTED: Rattus norvegicus cell surface receptor FDFACT-like (LOC100360108), mRNA [XM_002727949]                                                        | <b>7,332</b> |
| Klk7         | Rattus norvegicus kallikrein-related peptidase 7 (Klk7), mRNA [NM_001106254]                                                                              | <b>7,331</b> |
| Tmem86a      | Rattus norvegicus transmembrane protein 86A (Tmem86a), mRNA [NM_001135016]                                                                                | <b>7,330</b> |
| Zbtb45       | Rattus norvegicus zinc finger and BTB domain containing 45 (Zbtb45), mRNA [NM_001107478]                                                                  | <b>7,330</b> |
| RGD1559921   | PREDICTED: Rattus norvegicus similar to Macrophage migration inhibitory factor (MIF) (Delayed early response protein 6) (RGD1559921), mRNA [XM_001080942] | <b>7,330</b> |
| Prpf38b      | Rattus norvegicus PRP38 pre-mRNA processing factor 38 (yeast) domain containing B (Prpf38b), mRNA [NM_001024305]                                          | <b>7,329</b> |
| 0            | Rattus norvegicus similar to actin-related protein 2 (LOC301861), mRNA [XM_217505]                                                                        | <b>7,329</b> |
| 0            | Unknown                                                                                                                                                   | <b>7,328</b> |
| Rundc1       | Q96C34_HUMAN (Q96C34) RUNDC1 protein (Fragment), partial (40%) [TC601870]                                                                                 | <b>7,328</b> |
| Rab40c       | Rattus norvegicus Rab40c, member RAS oncogene family (Rab40c), mRNA [NM_182675]                                                                           | <b>7,325</b> |
| Zfp568       | Uncharacterized protein [Source:UniProtKB/TrEMBL;Acc:D4A3P6] [ENSRNOT00000039872]                                                                         | <b>7,325</b> |
| Diras1       | Rattus norvegicus DIRAS family, GTP-binding RAS-like 1 (Diras1), mRNA [NM_001108987]                                                                      | <b>7,325</b> |
| Bub3         | Rattus norvegicus budding uninhibited by benzimidazoles 3 homolog (S. cerevisiae) (Bub3), mRNA [NM_001047906]                                             | <b>7,322</b> |
| Vegp2        | Rattus norvegicus von Ebners gland protein 2 (Vegp2), mRNA [NM_053574]                                                                                    | <b>7,321</b> |
| Cnot1        | Rattus norvegicus CCR4-NOT transcription complex, subunit 1 (Cnot1), mRNA [NM_001134840]                                                                  | <b>7,321</b> |

|            |                                                                                                                                                                     |              |
|------------|---------------------------------------------------------------------------------------------------------------------------------------------------------------------|--------------|
| 0          | Histone H3 [Source:UniProtKB/TrEMBL;Acc:D4A602] [ENSRNOT00000030033]                                                                                                | <b>7,320</b> |
| 0          | Unknown                                                                                                                                                             | <b>7,320</b> |
| Dnah2      | Axonemal dynein heavy chain [Source:UniProtKB/TrEMBL;Acc:Q62820] [ENSRNOT00000045220]                                                                               | <b>7,320</b> |
| Sp9        | Rattus norvegicus trans-acting transcription factor 9 (Sp9), mRNA [NM_001191902]                                                                                    | <b>7,319</b> |
| RGD1560880 | Rattus norvegicus similar to RIKEN cDNA 2310002J15 (RGD1560880), mRNA [NM_001109194]                                                                                | <b>7,319</b> |
| RGD1559505 | Rattus norvegicus similar to RIKEN cDNA 9030409E16 (RGD1559505), mRNA [NM_001134608]                                                                                | <b>7,319</b> |
| RGD1560978 | Rattus norvegicus similar to hypothetical protein (RGD1560978), mRNA [NM_001134631]                                                                                 | <b>7,316</b> |
| Sox11      | Rattus norvegicus SRY (sex determining region Y)-box 11 (Sox11), mRNA [NM_053349]                                                                                   | <b>7,316</b> |
| Dgcr14     | Rattus norvegicus DiGeorge syndrome critical region gene 14 (Dgcr14), mRNA [NM_001012472]                                                                           | <b>7,316</b> |
| Nek7       | NIMA-related kinase 7 [Source:RefSeq peptide;Acc:NP_001101816] [ENSRNOT00000000817]                                                                                 | <b>7,315</b> |
| Prc1       | Rattus norvegicus protein regulator of cytokinesis 1 (Prc1), mRNA [NM_001107529]                                                                                    | <b>7,313</b> |
| 0          | Unknown                                                                                                                                                             | <b>7,313</b> |
| Cercam     | Rattus norvegicus cerebral endothelial cell adhesion molecule (Cercam), mRNA [NM_001011962]                                                                         | <b>7,313</b> |
| Asb18      | Rattus norvegicus ankyrin repeat and SOCS box-containing 18 (Asb18), mRNA [NM_001108231]                                                                            | <b>7,313</b> |
| 0          | Rattus norvegicus similar to cell division cycle associated 3; gene rich cluster, C8 gene; trigger of mitotic entry 1 (LOC316373), mRNA [XM_237105]                 | <b>7,312</b> |
| Stard13    | Rattus norvegicus StAR-related lipid transfer (START) domain containing 13 (Stard13), mRNA [NM_001109060]                                                           | <b>7,312</b> |
| 0          | Uncharacterized protein [Source:UniProtKB/TrEMBL;Acc:D3ZIF9] [ENSRNOT00000067842]                                                                                   | <b>7,311</b> |
| Tsc22d3    | Rattus norvegicus TSC22 domain family, member 3 (Tsc22d3), mRNA [NM_031345]                                                                                         | <b>7,310</b> |
| Olr481     | Rattus norvegicus olfactory receptor 481 (Olr481), mRNA [NM_001000684]                                                                                              | <b>7,310</b> |
| 0          | Uncharacterized protein [Source:UniProtKB/TrEMBL;Acc:D3Z840] [ENSRNOT00000050759]                                                                                   | <b>7,309</b> |
| F8         | Rattus norvegicus coagulation factor VIII, procoagulant component (F8), mRNA [NM_183331]                                                                            | <b>7,309</b> |
| 0          | Rattus norvegicus chromosome 20, major histocompatibility complex, assembled from 40 BACs, strain Brown Norway (BN/ssNHsd), RT1n haplotype; segment 5/11 [BX883046] | <b>7,308</b> |
| Tdp1       | Rattus norvegicus tyrosyl-DNA phosphodiesterase 1 (Tdp1), mRNA [NM_001031657]                                                                                       | <b>7,308</b> |
| Fn1        | Rattus norvegicus fibronectin 1 (Fn1), mRNA [NM_019143]                                                                                                             | <b>7,308</b> |
| Arnt       | Rattus norvegicus aryl hydrocarbon receptor nuclear translocator (Arnt), mRNA [NM_012780]                                                                           | <b>7,307</b> |
| 0          | Uncharacterized protein [Source:UniProtKB/TrEMBL;Acc:D4A9K1] [ENSRNOT00000031814]                                                                                   | <b>7,306</b> |
| Cct6a      | Rattus norvegicus chaperonin containing Tcp1, subunit 6A (zeta 1) (Cct6a), mRNA [NM_001033684]                                                                      | <b>7,304</b> |
| LOC683722  | Rattus norvegicus similar to Fgfr1 oncogene partner (LOC683722), mRNA [NM_001101008]                                                                                | <b>7,304</b> |
| 0          | Unknown                                                                                                                                                             | <b>7,303</b> |
| Rnmt       | mRNA cap guanine-N7 methyltransferase [Source:UniProtKB/Swiss-Prot;Acc:Q5U2U7] [ENSRNOT00000022410]                                                                 | <b>7,303</b> |
| Med30      | Rattus norvegicus mediator complex subunit 30 (Med30), mRNA [NM_001130539]                                                                                          | <b>7,301</b> |
| Krt15      | Rattus norvegicus keratin 15 (Krt15), mRNA [NM_001004022]                                                                                                           | <b>7,300</b> |

|            |                                                                                                                                                                                                                    |       |
|------------|--------------------------------------------------------------------------------------------------------------------------------------------------------------------------------------------------------------------|-------|
| 0          | Unknown                                                                                                                                                                                                            | 7,298 |
| Olr221     | Rattus norvegicus olfactory receptor 221 (Olr221), mRNA [NM_001000200]                                                                                                                                             | 7,298 |
| Fam181b    | Rattus norvegicus family with sequence similarity 181, member B (Fam181b), mRNA [NM_001109150]                                                                                                                     | 7,297 |
| Ccdc124    | Rattus norvegicus coiled-coil domain containing 124 (Ccdc124), mRNA [NM_001106071]                                                                                                                                 | 7,294 |
| Trip4      | Rattus norvegicus thyroid hormone receptor interactor 4 (Trip4), mRNA [NM_001134981]                                                                                                                               | 7,293 |
| Dpy19I4    | Putative uncharacterized protein RGD1305828_predictedUncharacterized protein [Source:UniProtKB/TrEMBL;Acc:D3Z939] [ENSRNOT00000037869]                                                                             | 7,293 |
| Atp11b     | Atp11b protein [Source:UniProtKB/TrEMBL;Acc:Q5RJS7] [ENSRNOT00000016961]                                                                                                                                           | 7,290 |
| Tmed7      | Rattus norvegicus transmembrane emp24 protein transport domain containing 7 (Tmed7), mRNA [NM_001105758]                                                                                                           | 7,290 |
| Klhl21     | Rattus norvegicus kelch-like 21 (Drosophila) (Klhl21), mRNA [NM_001107996]                                                                                                                                         | 7,290 |
| 0          | Rattus norvegicus similar to glyceraldehyde-3-phosphate dehydrogenase (LOC313970), mRNA [XM_234037]                                                                                                                | 7,289 |
| G2e3       | Rattus norvegicus G2/M-phase specific E3 ubiquitin ligase (G2e3), mRNA [NM_001106726]                                                                                                                              | 7,289 |
| Apoa1bp    | Rattus norvegicus apolipoprotein A-I binding protein (Apoa1bp), mRNA [NM_001106440]                                                                                                                                | 7,287 |
| 0          | Similar to oxysterol-binding protein-like protein 8 isoform a (Similar to oxysterol-binding protein-like protein 8 isoform a (Predicted), isoform CRA_a) [Source:UniProtKB/TrEMBL;Acc:B5DF26] [ENSRNOT00000029993] | 7,287 |
| 0          | Uncharacterized protein [Source:UniProtKB/TrEMBL;Acc:D4A4F9] [ENSRNOT00000057735]                                                                                                                                  | 7,287 |
| Idi1       | Rattus norvegicus isopentenyl-diphosphate delta isomerase 1 (Idi1), mRNA [NM_053539]                                                                                                                               | 7,286 |
| Ssr2       | Rattus norvegicus signal sequence receptor, beta (Ssr2), mRNA [NM_001106442]                                                                                                                                       | 7,283 |
| 0          | Unknown                                                                                                                                                                                                            | 7,282 |
| Vegfb      | Rattus norvegicus vascular endothelial growth factor B (Vegfb), mRNA [NM_053549]                                                                                                                                   | 7,282 |
| Serf1      | PREDICTED: Rattus norvegicus small EDRK-rich factor 1 (Serf1), mRNA [XM_001070716]                                                                                                                                 | 7,281 |
| Grk6       | Rattus norvegicus G protein-coupled receptor kinase 6 (Grk6), transcript variant 1, mRNA [NM_031657]                                                                                                               | 7,281 |
| LOC365238  | Rattus norvegicus similar to CG15432-PA (LOC365238), mRNA [NM_001108913]                                                                                                                                           | 7,281 |
| Rdx        | Rattus norvegicus radixin (Rdx), mRNA [NM_001005889]                                                                                                                                                               | 7,279 |
| Lfng       | Rattus norvegicus LFNG O-fucosylpeptide 3-beta-N-acetylglucosaminyltransferase (Lfng), mRNA [NM_133393]                                                                                                            | 7,278 |
| Spata24    | Rattus norvegicus spermatogenesis associated 24 (Spata24), mRNA [NM_001025636]                                                                                                                                     | 7,277 |
| 0          | BQ195967 UI-R-CN1-cmn-g-04-0-UI.s1 UI-R-CN1 Rattus norvegicus cDNA clone UI-R-CN1-cmn-g-04-0-UI 3', mRNA sequence [BQ195967]                                                                                       | 7,277 |
| Cd79a      | PREDICTED: Rattus norvegicus Cd79a molecule, immunoglobulin-associated alpha (Cd79a), mRNA [XM_002725547]                                                                                                          | 7,276 |
| RGD1562502 | Rattus norvegicus similar to RIKEN cDNA 2610029G23 (RGD1562502), mRNA [NM_001108818]                                                                                                                               | 7,275 |
| 0          | Unknown                                                                                                                                                                                                            | 7,275 |
| 0          | Unknown                                                                                                                                                                                                            | 7,275 |
| Olr862     | Rattus norvegicus olfactory receptor 862 (Olr862), mRNA [NM_001001071]                                                                                                                                             | 7,273 |
| Spg20      | Rattus norvegicus spastic paraplegia 20 (Troyer syndrome) homolog (human) (Spg20), mRNA [NM_001106433]                                                                                                             | 7,273 |
| Rsl1d1     | Rattus norvegicus ribosomal L1 domain containing 1 (Rsl1d1), mRNA [NM_001008876]                                                                                                                                   | 7,272 |

|            |                                                                                                                                                        |              |
|------------|--------------------------------------------------------------------------------------------------------------------------------------------------------|--------------|
| 0          | Unknown                                                                                                                                                | <b>7,270</b> |
| LOC497940  | Rattus norvegicus similar to RIKEN cDNA 2810408A11 (LOC497940), mRNA [NM_001017476]                                                                    | <b>7,270</b> |
| LOC690937  | PREDICTED: Rattus norvegicus similar to Discs large homolog 5 (Placenta and prostate DLG) (Discs large protein P-dlg) (LOC690937), mRNA [XM_001076213] | <b>7,269</b> |
| Hectd1     | Uncharacterized protein [Source:UniProtKB/TrEMBL;Acc:D3ZLS5] [ENSRNOT00000008459]                                                                      | <b>7,267</b> |
| Stk32c     | Rattus norvegicus serine/threonine kinase 32C (Stk32c), mRNA [NM_001108922]                                                                            | <b>7,267</b> |
| Rnd1       | Rattus norvegicus Rho family GTPase 1 (Rnd1), mRNA [NM_001013222]                                                                                      | <b>7,267</b> |
| Azin1      | Rattus norvegicus antizyme inhibitor 1 (Azin1), mRNA [NM_022585]                                                                                       | <b>7,266</b> |
| 0          | Rattus norvegicus similar to protein-tyrosine-phosphatase (EC 3.1.3.48) isoenzyme AcP2 - rat (LOC289297), mRNA [XM_222985]                             | <b>7,266</b> |
| Nars2      | Rattus norvegicus asparaginyl-tRNA synthetase 2 (mitochondrial)(putative) (Nars2), nuclear gene encoding mitochondrial protein, mRNA [NM_001034921]    | <b>7,265</b> |
| Zfp458     | Rattus norvegicus zinc finger protein 458 (Zfp458), transcript variant 1, mRNA [NM_001142962]                                                          | <b>7,264</b> |
| Lonrf2     | Uncharacterized protein [Source:UniProtKB/TrEMBL;Acc:D3ZX48] [ENSRNOT00000033964]                                                                      | <b>7,263</b> |
| Csrnp3     | Similar to TGF-beta induced apoptosis protein 2 (Predicted)Uncharacterized protein [Source:UniProtKB/TrEMBL;Acc:D4AE74] [ENSRNOT00000007197]           | <b>7,262</b> |
| G3bp2      | Rattus norvegicus GTPase activating protein (SH3 domain) binding protein 2 (G3bp2), mRNA [NM_001013989]                                                | <b>7,262</b> |
| Cse1l      | Rattus norvegicus CSE1 chromosome segregation 1-like (yeast) (Cse1l), mRNA [NM_001108607]                                                              | <b>7,261</b> |
| Plekha3    | Rattus norvegicus pleckstrin homology domain-containing, family A (phosphoinositide binding specific) member 3 (Plekha3), mRNA [NM_001013077]          | <b>7,260</b> |
| Slco1a4    | Rattus norvegicus solute carrier organic anion transporter family, member 1a4 (Slco1a4), mRNA [NM_131906]                                              | <b>7,260</b> |
| RGD1306783 | Rattus norvegicus similar to 2810422O20Rik protein (RGD1306783), mRNA [NM_001025668]                                                                   | <b>7,260</b> |
| Synrg      | Rattus norvegicus synergin, gamma (Synrg), mRNA [NM_053419]                                                                                            | <b>7,259</b> |
| Vamp4      | Rattus norvegicus vesicle-associated membrane protein 4 (Vamp4), mRNA [NM_001108856]                                                                   | <b>7,259</b> |
| Mfsd7      | Rattus norvegicus major facilitator superfamily domain containing 7 (Mfsd7), mRNA [NM_001107246]                                                       | <b>7,257</b> |
| 0          | Unknown                                                                                                                                                | <b>7,257</b> |
| Gls        | Rattus norvegicus glutaminase (Gls), nuclear gene encoding mitochondrial protein, transcript variant 2, mRNA [NM_001109968]                            | <b>7,256</b> |
| Aqp9       | Rattus norvegicus aquaporin 9 (Aqp9), mRNA [NM_022960]                                                                                                 | <b>7,255</b> |
| Ano4       | Rattus norvegicus anoctamin 4 (Ano4), mRNA [NM_001106778]                                                                                              | <b>7,254</b> |
| Wfdc1      | Rattus norvegicus WAP four-disulfide core domain 1 (Wfdc1), mRNA [NM_133581]                                                                           | <b>7,253</b> |
| Gmcl1l     | Uncharacterized protein [Source:UniProtKB/TrEMBL;Acc:D3ZV83] [ENSRNOT00000048887]                                                                      | <b>7,252</b> |
| 0          | Q2PC21_BOVIN (Q2PC21) HCAP-G protein (Fragment), partial (88%) [TC601153]                                                                              | <b>7,252</b> |
| Zfp52      | Rattus norvegicus zinc finger protein 52 (Zfp52), mRNA [NM_001014158]                                                                                  | <b>7,248</b> |
| Zfp706     | Rattus norvegicus zinc finger protein 706 (Zfp706), mRNA [NM_001126087]                                                                                | <b>7,247</b> |
| 0          | Unknown                                                                                                                                                | <b>7,247</b> |

|           |                                                                                                                                    |       |
|-----------|------------------------------------------------------------------------------------------------------------------------------------|-------|
| Hnrnpc    | Rattus norvegicus heterogeneous nuclear ribonucleoprotein C (C1/C2) (Hnrnpc), mRNA [NM_001025633]                                  | 7,246 |
| Tmem229b  | Rattus norvegicus transmembrane protein 229B (Tmem229b), mRNA [NM_001109359]                                                       | 7,245 |
| 0         | Uncharacterized protein [Source:UniProtKB/TrEMBL;Acc:D3ZXV2] [ENSRNOT00000043588]                                                  | 7,245 |
| Sbf1      | PREDICTED: Rattus norvegicus SET binding factor 1 (Sbf1), mRNA [XM_001054780]                                                      | 7,245 |
| 0         | Unknown                                                                                                                            | 7,242 |
| LOC684024 | PREDICTED: Rattus norvegicus similar to dual specificity phosphatase 5 (LOC684024), mRNA [XM_001068576]                            | 7,242 |
| Tmed3     | Rattus norvegicus transmembrane emp24 protein transport domain containing 3 (Tmed3), mRNA [NM_001004249]                           | 7,241 |
| Prp2      | Rattus norvegicus proline rich protein 2 (Prp2), mRNA [NM_001013211]                                                               | 7,240 |
| 0         | Unknown                                                                                                                            | 7,238 |
| Cenpl     | Rattus norvegicus centromere protein L (Cenpl), mRNA [NM_001033061]                                                                | 7,237 |
| 0         | PREDICTED: Rattus norvegicus ADAMTS-like 1 (Adamtsl1), mRNA [XM_342858]                                                            | 7,237 |
| Lrtm2     | Rattus norvegicus leucine-rich repeats and transmembrane domains 2 (Lrtm2), mRNA [NM_001109430]                                    | 7,237 |
| 0         | Uncharacterized protein [Source:UniProtKB/TrEMBL;Acc:D3ZQC4] [ENSRNOT00000050888]                                                  | 7,236 |
| Arid3b    | Rattus norvegicus AT rich interactive domain 3B (Bright like) (Arid3b), mRNA [NM_001109001]                                        | 7,236 |
| Slc15a1   | Rattus norvegicus solute carrier family 15 (oligopeptide transporter), member 1 (Slc15a1), transcript variant 1, mRNA [NM_057121]  | 7,236 |
| 0         | Unknown                                                                                                                            | 7,236 |
| Slc30a9   | Rattus norvegicus solute carrier family 30 (zinc transporter), member 9 (Slc30a9), mRNA [NM_001109088]                             | 7,236 |
| Slc10a5   | Rattus norvegicus solute carrier family 10 (sodium/bile acid cotransporter family), member 5 (Slc10a5), mRNA [NM_001025280]        | 7,236 |
| 0         | Uncharacterized protein [Source:UniProtKB/TrEMBL;Acc:D4A6W7] [ENSRNOT00000009090]                                                  | 7,235 |
| Slc25a38  | Rattus norvegicus solute carrier family 25, member 38 (Slc25a38), nuclear gene encoding mitochondrial protein, mRNA [NM_001030032] | 7,235 |
| MGC95208  | Rattus norvegicus similar to 4930453N24Rik protein (MGC95208), mRNA [NM_001005552]                                                 | 7,234 |
| Mterfd3   | Rattus norvegicus MTERF domain containing 3 (Mterfd3), mRNA [NM_001014265]                                                         | 7,234 |
| Serp1     | Rattus norvegicus stress-associated endoplasmic reticulum protein 1 (Serp1), mRNA [NM_030835]                                      | 7,233 |
| Znf644    | Rattus norvegicus zinc finger protein 644 (Znf644), mRNA [NM_001139484]                                                            | 7,233 |
| Rela      | Rattus norvegicus v-rel reticuloendotheliosis viral oncogene homolog A (avian) (Rela), mRNA [NM_199267]                            | 7,232 |
| Vom2r76   | Rattus norvegicus vomeronasal 2 receptor, 76 (Vom2r76), mRNA [NM_001099505]                                                        | 7,232 |
| Sptb      | Rattus norvegicus spectrin, beta, erythrocytic (Sptb), mRNA [NM_212522]                                                            | 7,231 |
| Ppp1r9a   | Rattus norvegicus protein phosphatase 1, regulatory (inhibitor) subunit 9A (Ppp1r9a), mRNA [NM_053473]                             | 7,231 |
| LOC361016 | Rattus norvegicus similar to RIKEN cDNA 4933406L09, mRNA (cDNA clone IMAGE:7301570), complete cds. [BC086559]                      | 7,229 |
| Trim28    | Rattus norvegicus tripartite motif-containing 28 (Trim28), mRNA [NM_053916]                                                        | 7,229 |
| Chml      | Rattus norvegicus choroideremia-like (Rab escort protein 2) (Chml), mRNA [NM_001109524]                                            | 7,229 |
| Mrpl17    | Rattus norvegicus mitochondrial ribosomal protein L17 (Mrpl17), nuclear gene encoding mitochondrial protein, mRNA [NM_133539]      | 7,229 |
| Siglec15  | Rattus norvegicus sialic acid binding Ig-like lectin 15 (Siglec15), mRNA [NM_001191942]                                            | 7,226 |
| Gpd1l     | Rattus norvegicus glycerol-3-phosphate dehydrogenase 1-like (Gpd1l), mRNA [NM_001191885]                                           | 7,226 |

|            |                                                                                                                               |       |
|------------|-------------------------------------------------------------------------------------------------------------------------------|-------|
| LOC679800  | PREDICTED: Rattus norvegicus similar to MIC2 like 1 (LOC679800), mRNA [XM_001054523]                                          | 7,225 |
| Crls1      | Rattus norvegicus cardiolipin synthase 1 (Crls1), mRNA [NM_001014258]                                                         | 7,225 |
| Tjp1       | Rattus norvegicus tight junction protein 1 (Tjp1), mRNA [NM_001106266]                                                        | 7,222 |
| 0          | Unknown                                                                                                                       | 7,221 |
| 0          | Unknown                                                                                                                       | 7,220 |
| LOC688390  | Rattus norvegicus hypothetical protein LOC688390 (LOC688390), mRNA [NM_001109496]                                             | 7,220 |
| Hoxc6      | PREDICTED: Rattus norvegicus homeo box C6, transcript variant 1 (Hoxc6), mRNA [XM_001069410]                                  | 7,219 |
| RGD1310016 | Uncharacterized protein [Source:UniProtKB/TrEMBL;Acc:D3ZNB8] [ENSRNOT00000021783]                                             | 7,219 |
| 0          | Unknown                                                                                                                       | 7,218 |
| Rab33a     | Rattus norvegicus RAB33A, member RAS oncogene family (Rab33a), mRNA [NM_001108257]                                            | 7,217 |
| Fam178a    | Rattus norvegicus family with sequence similarity 178, member A (Fam178a), mRNA [NM_001134612]                                | 7,217 |
| Pim3       | Rattus norvegicus pim-3 oncogene (Pim3), mRNA [NM_022602]                                                                     | 7,215 |
| 0          | PREDICTED: Rattus norvegicus similar to H3 histone, family 3B (RGD1564548), mRNA [XM_001072064]                               | 7,212 |
| Tm6sf1     | Rattus norvegicus transmembrane 6 superfamily member 1 (Tm6sf1), mRNA [NM_001108490]                                          | 7,211 |
| Paqr7      | Rattus norvegicus progestin and adipoQ receptor family member VII (Paqr7), mRNA [NM_001034081]                                | 7,210 |
| Pex14      | Rattus norvegicus peroxisomal biogenesis factor 14 (Pex14), mRNA [NM_172063]                                                  | 7,209 |
| 0          | Uncharacterized protein [Source:UniProtKB/TrEMBL;Acc:D3ZTT2] [ENSRNOT00000059588]                                             | 7,208 |
| Dync1i2    | Rattus norvegicus dynein cytoplasmic 1 intermediate chain 2 (Dync1i2), mRNA [NM_053880]                                       | 7,208 |
| Bfar       | Rattus norvegicus bifunctional apoptosis regulator (Bfar), mRNA [NM_001013125]                                                | 7,207 |
| Snrnp27    | Rattus norvegicus small nuclear ribonucleoprotein 27 (U4/U6.U5) (Snrnp27), mRNA [NM_001108636]                                | 7,206 |
| Fbxo34     | Rattus norvegicus F-box protein 34 (Fbxo34), mRNA [NM_001107257]                                                              | 7,206 |
| Znf513     | Rattus norvegicus zinc finger protein 513 (Znf513), mRNA [NM_001012110]                                                       | 7,206 |
| Lmx1a      | Rattus norvegicus LIM homeobox transcription factor 1 alpha (Lmx1a), mRNA [NM_001105967]                                      | 7,204 |
| Yrdc       | Rattus norvegicus yrdC domain containing (E.coli) (Yrdc), nuclear gene encoding mitochondrial protein, mRNA [NM_175604]       | 7,203 |
| Gpr161     | G protein-coupled receptor 161 [Source:RefSeq peptide;Acc:NP_001178601] [ENSRNOT00000067745]                                  | 7,203 |
| RGD1306928 | PREDICTED: Rattus norvegicus similar to hypothetical protein MGC13138, transcript variant 1 (RGD1306928), mRNA [XM_001080215] | 7,203 |
| Mfap4      | Rattus norvegicus microfibrillar-associated protein 4 (Mfap4), mRNA [NM_001034124]                                            | 7,203 |
| Acap3      | Rattus norvegicus ArfGAP with coiled-coil, ankyrin repeat and PH domains 3 (Acap3), mRNA [NM_001107999]                       | 7,203 |
| 0          | Unknown                                                                                                                       | 7,202 |
| Wdfy2      | Rattus norvegicus WD repeat and FYVE domain containing 2 (Wdfy2), mRNA [NM_001107269]                                         | 7,202 |
| 0          | Glyceraldehyde-3-phosphate dehydrogenase [Source:UniProtKB/TrEMBL;Acc:D3ZWV2] [ENSRNOT00000030148]                            | 7,201 |
| LOC684652  | PREDICTED: Rattus norvegicus hypothetical protein LOC684652 (LOC684652), partial mRNA [XM_001055278]                          | 7,201 |
| LOC502894  | Rattus norvegicus hypothetical protein LOC502894 (LOC502894), mRNA [NM_001025064]                                             | 7,200 |
| Zmynd15    | Rattus norvegicus zinc finger, MYND-type containing 15 (Zmynd15), mRNA [NM_001105800]                                         | 7,199 |

|         |                                                                                                                                                |       |
|---------|------------------------------------------------------------------------------------------------------------------------------------------------|-------|
| Rnd3    | Rattus norvegicus Rho family GTPase 3 (Rnd3), mRNA [NM_001007641]                                                                              | 7,198 |
| 0       | Unknown                                                                                                                                        | 7,198 |
| 0       | Rattus norvegicus strain BN/SsNHsdMCW RNOR03327191, whole genome shotgun sequence [AABR03127998]                                               | 7,197 |
| 0       | Unknown                                                                                                                                        | 7,197 |
| Adar    | Rattus norvegicus adenosine deaminase, RNA-specific (Adar), mRNA [NM_031006]                                                                   | 7,196 |
| Josd2   | Rattus norvegicus Josephin domain containing 2 (Josd2), mRNA [NM_001106256]                                                                    | 7,196 |
| Ralbp1  | Rattus norvegicus ralA binding protein 1 (Ralbp1), mRNA [NM_032067]                                                                            | 7,196 |
| Tmem55b | Rattus norvegicus transmembrane protein 55B (Tmem55b), mRNA [NM_001014233]                                                                     | 7,195 |
| 0       | Unknown                                                                                                                                        | 7,195 |
| Nt5c3l  | Rattus norvegicus 5'-nucleotidase, cytosolic III-like (Nt5c3l), mRNA [NM_001007723]                                                            | 7,195 |
| Zbtb11  | Rattus norvegicus zinc finger and BTB domain containing 11 (Zbtb11), mRNA [NM_001107097]                                                       | 7,195 |
| 0       | Unknown                                                                                                                                        | 7,194 |
| Cpt1c   | Rattus norvegicus carnitine palmitoyltransferase 1c (Cpt1c), mRNA [NM_001034925]                                                               | 7,191 |
| Camk2g  | Rattus norvegicus calcium/calmodulin-dependent protein kinase II gamma (Camk2g), mRNA [NM_133605]                                              | 7,190 |
| Fyttd1  | Rattus norvegicus forty-two-three domain containing 1 (Fyttd1), mRNA [NM_001047899]                                                            | 7,190 |
| Ing2    | Rattus norvegicus inhibitor of growth family, member 2 (Ing2), mRNA [NM_001106083]                                                             | 7,190 |
| Tex264  | Rattus norvegicus testis expressed 264 (Tex264), mRNA [NM_001007665]                                                                           | 7,188 |
| 0       | Unknown                                                                                                                                        | 7,188 |
| 0       | Rattus norvegicus strain Sprague-Dawley morphine related protein-1 mRNA, complete cds. [AF145796]                                              | 7,187 |
| Masp2   | Rattus Norvegicus mRNA for MAp19 protein, partial clone prl-5. [Y18568]                                                                        | 7,187 |
| 0       | Unknown                                                                                                                                        | 7,187 |
| 0       | Uncharacterized protein [Source:UniProtKB/TrEMBL;Acc:D3ZER7] [ENSRNOT00000043011]                                                              | 7,186 |
| 0       | Unknown                                                                                                                                        | 7,185 |
| Tmprss6 | Rattus norvegicus transmembrane protease, serine 6 (Tmprss6), mRNA [NM_001130556]                                                              | 7,185 |
| Serpnb2 | Rattus norvegicus serpin peptidase inhibitor, clade B (ovalbumin), member 2 (Serpnb2), mRNA [NM_021696]                                        | 7,185 |
| 0       | Rattus norvegicus similar to Elongation factor 1-gamma (EF-1-gamma) (eEF-1B gamma) (LOC364451), mRNA [XM_344447]                               | 7,185 |
| Gkap1   | Rattus norvegicus G kinase anchoring protein 1 (Gkap1), mRNA [NM_001012160]                                                                    | 7,184 |
| Fgd4    | Rattus norvegicus FYVE, RhoGEF and PH domain containing 4 (Fgd4), mRNA [NM_139263]                                                             | 7,184 |
| Inpp1   | Rattus norvegicus inositol polyphosphate-1-phosphatase (Inpp1), mRNA [NM_001012131]                                                            | 7,184 |
| Tmem181 | Rattus norvegicus transmembrane protein 181 (Tmem181), mRNA [NM_001130939]                                                                     | 7,184 |
| Fau     | Rattus norvegicus Finkel-Biskis-Reilly murine sarcoma virus (FBR-MuSV) ubiquitously expressed (Fau), transcript variant 1, mRNA [NM_001012739] | 7,184 |
| Me3     | Rattus norvegicus malic enzyme 3, NADP(+)-dependent, mitochondrial (Me3), nuclear gene encoding mitochondrial protein, mRNA [NM_001108491]     | 7,183 |



|            |                                                                                                                                                                         |       |
|------------|-------------------------------------------------------------------------------------------------------------------------------------------------------------------------|-------|
| Tcea1      | Rattus norvegicus transcription elongation factor A (SII) 1 (Tcea1), mRNA [NM_001025735]                                                                                | 7,183 |
| Rnf19a     | Rattus norvegicus ring finger protein 19A (Rnf19a), mRNA [NM_001130560]                                                                                                 | 7,183 |
| Lcmt1      | Rattus norvegicus leucine carboxyl methyltransferase 1 (Lcmt1), mRNA [NM_199405]                                                                                        | 7,183 |
| Serac1     | Similar to serine active site containing 1 (Predicted)Uncharacterized protein [Source:UniProtKB/TrEMBL;Acc:D3ZEJ3] [ENSRNOT00000060527]                                 | 7,182 |
| Csf2ra     | Rattus norvegicus granulocyte-macrophage colony stimulating receptor alpha (Csf2ra), mRNA [NM_001037660]                                                                | 7,181 |
| Tor1aip1   | Rattus norvegicus torsin A interacting protein 1 (Tor1aip1), mRNA [NM_145092]                                                                                           | 7,179 |
| 0          | Unknown                                                                                                                                                                 | 7,179 |
| Ddx3x      | Rattus norvegicus DEAD (Asp-Glu-Ala-Asp) box polypeptide 3, X-linked (Ddx3x), mRNA [NM_001108246]                                                                       | 7,177 |
| 0          | Rattus norvegicus similar to Aspartate aminotransferase, mitochondrial precursor (Transaminase A) (Glutamate oxaloacetate transaminase-2) (LOC296593), mRNA [XM_231092] | 7,177 |
| Pgm2l1     | Rattus norvegicus phosphoglucomutase 2-like 1 (Pgm2l1), mRNA [NM_001109454]                                                                                             | 7,177 |
| Neur12     | Rattus norvegicus neuralized homolog 2 (Drosophila) (Neur12), mRNA [NM_001107802]                                                                                       | 7,176 |
| Aoc3       | Rattus norvegicus amine oxidase, copper containing 3 (vascular adhesion protein 1) (Aoc3), mRNA [NM_031582]                                                             | 7,176 |
| Ccnf       | Rattus norvegicus cyclin F (Ccnf), mRNA [NM_001100474]                                                                                                                  | 7,175 |
| Tlk1       | Rattus norvegicus tousled-like kinase 1 (Tlk1), mRNA [NM_001107734]                                                                                                     | 7,175 |
| 0          | Unknown                                                                                                                                                                 | 7,174 |
| Nudt13     | Rattus norvegicus nudix (nucleoside diphosphate linked moiety X)-type motif 13 (Nudt13), mRNA [NM_001127636]                                                            | 7,173 |
| Dsc2       | Rattus norvegicus desmocollin 2 (Dsc2), mRNA [NM_001033688]                                                                                                             | 7,171 |
| Bzrap1     | Peripheral-type benzodiazepine receptor-associated protein 1 [Source:UniProtKB/Swiss-Prot;Acc:Q9JIR0] [ENSRNOT00000045158]                                              | 7,171 |
| 0          | PREDICTED: Rattus norvegicus similar to KIAA0953 protein (RGD1310845), mRNA [XM_233942]                                                                                 | 7,171 |
| Scrn1      | Rattus norvegicus secernin 1 (Scrn1), mRNA [NM_001025063]                                                                                                               | 7,170 |
| RGD1559442 | Rattus norvegicus similar to SET binding factor 2 (LOC691036), mRNA [NM_001134970]                                                                                      | 7,169 |
| Atmin      | Rattus norvegicus ATM interactor (Atmin), mRNA [NM_001191786]                                                                                                           | 7,169 |
| Pde9a      | Rattus norvegicus phosphodiesterase 9A (Pde9a), mRNA [NM_138543]                                                                                                        | 7,167 |
| 0          | Unknown                                                                                                                                                                 | 7,167 |
| Abhd10     | Rattus norvegicus abhydrolase domain containing 10 (Abhd10), mRNA [NM_001123352]                                                                                        | 7,166 |
| RGD1564515 | PREDICTED: Rattus norvegicus similar to alpha 1B-glycoprotein (RGD1564515), mRNA [XM_001069779]                                                                         | 7,166 |
| Lca5       | Rattus norvegicus Leber congenital amaurosis 5 (human) (Lca5), mRNA [NM_001013954]                                                                                      | 7,165 |
| 0          | PREDICTED: Rattus norvegicus single-stranded DNA binding protein 2 (Ssbp2), mRNA [XM_001065491]                                                                         | 7,164 |
| Zfand6     | Rattus norvegicus zinc finger, AN1-type domain 6 (Zfand6), mRNA [NM_001007630]                                                                                          | 7,162 |
| Mtmr10     | Rattus norvegicus myotubularin related protein 10 (Mtmr10), mRNA [NM_001100846]                                                                                         | 7,162 |
| Copg       | Rattus norvegicus coatomer protein complex, subunit gamma (Copg), mRNA [NM_001031822]                                                                                   | 7,161 |
| Stx2       | Rattus norvegicus syntaxin 2 (Stx2), mRNA [NM_012748]                                                                                                                   | 7,160 |
| 0          | Unknown                                                                                                                                                                 | 7,160 |

|            |                                                                                                                                             |              |
|------------|---------------------------------------------------------------------------------------------------------------------------------------------|--------------|
| Znf865     | Rattus norvegicus zinc finger protein 865 (Znf865), mRNA [NM_001134544]                                                                     | <b>7,159</b> |
| RGD1311267 | Rattus norvegicus similar to RIKEN cDNA 4931426K16 gene (RGD1311267), mRNA [NM_001039024]                                                   | <b>7,158</b> |
| 0          | Rattus norvegicus similar to glyceraldehyde-3-phosphate dehydrogenase (phosphorylating) (EC 1.2.1.12) - mouse (LOC294405), mRNA [XM_215391] | <b>7,157</b> |
| Gnb2       | Rattus norvegicus guanine nucleotide binding protein (G protein), beta polypeptide 2 (Gnb2), mRNA [NM_031037]                               | <b>7,157</b> |
| Tas2r109   | Rattus norvegicus taste receptor, type 2, member 109 (Tas2r109), mRNA [NM_001080939]                                                        | <b>7,157</b> |
| Lnp        | Rattus norvegicus limb and neural patterns (Lnp), mRNA [NM_001077429]                                                                       | <b>7,156</b> |
| 0          | Unknown                                                                                                                                     | <b>7,154</b> |
| Ptpn6      | Rattus norvegicus protein tyrosine phosphatase, non-receptor type 6 (Ptpn6), mRNA [NM_053908]                                               | <b>7,153</b> |
| Ppap2c     | Rattus norvegicus phosphatidic acid phosphatase type 2c (Ppap2c), mRNA [NM_139252]                                                          | <b>7,151</b> |
| Ap1b1      | Rattus norvegicus adaptor-related protein complex 1, beta 1 subunit (Ap1b1), mRNA [NM_017277]                                               | <b>7,150</b> |
| Fam53a     | Rattus norvegicus family with sequence similarity 53, member A (Fam53a), mRNA [NM_001107228]                                                | <b>7,150</b> |
| Gpr172a    | Rattus norvegicus G protein-coupled receptor 172A (Gpr172a), mRNA [NM_001109670]                                                            | <b>7,149</b> |
| Pnlcd1     | Rattus norvegicus poly(A)-specific ribonuclease (PARN)-like domain containing 1 (Pnlcd1), mRNA [NM_001025724]                               | <b>7,149</b> |
| RGD1311273 | Rattus norvegicus similar to RIKEN cDNA 9530058B02 (RGD1311273), mRNA [NM_001109475]                                                        | <b>7,148</b> |
| Pak4       | Rattus norvegicus p21 protein (Cdc42/Rac)-activated kinase 4 (Pak4), mRNA [NM_001106238]                                                    | <b>7,148</b> |
| 0          | Q4KM71_RAT (Q4KM71) NonO/p54nrb homolog, complete [TC583734]                                                                                | <b>7,147</b> |
| 0          | PREDICTED: Rattus norvegicus similar to RIKEN cDNA 1500001A10 (RGD1560213), miscRNA [XR_085996]                                             | <b>7,147</b> |
| Gsn        | Rattus norvegicus gelsolin (Gsn), mRNA [NM_001004080]                                                                                       | <b>7,146</b> |
| Inpp5k     | Rattus norvegicus inositol polyphosphate-5-phosphatase K (Inpp5k), mRNA [NM_001013859]                                                      | <b>7,146</b> |
| 0          | Lysophosphatidylcholine acyltransferase 2B [Source:UniProtKB/Swiss-Prot;Acc:Q4V8A1] [ENSRNOT00000037141]                                    | <b>7,145</b> |
| Spsb1      | Rattus norvegicus splA/ryanodine receptor domain and SOCS box containing 1 (Spsb1), mRNA [NM_001107994]                                     | <b>7,145</b> |
| Bag1       | Rattus norvegicus BCL2-associated athanogene (Bag1), mRNA [NM_001106647]                                                                    | <b>7,145</b> |
| Fam35a     | Rattus norvegicus family with sequence similarity 35, member A (Fam35a), mRNA [NM_001025028]                                                | <b>7,145</b> |
| Fgfbp3     | Rattus norvegicus fibroblast growth factor binding protein 3 (Fgfbp3), mRNA [NM_001109165]                                                  | <b>7,145</b> |
| RGD1311433 | Uncharacterized protein [Source:UniProtKB/TrEMBL;Acc:D3Z9R2] [ENSRNOT00000003700]                                                           | <b>7,144</b> |
| Higd2a     | Rattus norvegicus HIG1 hypoxia inducible domain family, member 2A (Higd2a), mRNA [NM_001106102]                                             | <b>7,144</b> |
| Rad54l     | Rattus norvegicus RAD54 like (S. cerevisiae) (Rad54l), mRNA [NM_001134960]                                                                  | <b>7,144</b> |
| 0          | Unknown                                                                                                                                     | <b>7,143</b> |
| Olr1614    | Rattus norvegicus olfactory receptor 1614 (Olr1614), mRNA [NM_001000841]                                                                    | <b>7,142</b> |
| Ephb3      | Rattus norvegicus Eph receptor B3 (Ephb3), mRNA [NM_001105868]                                                                              | <b>7,141</b> |
| Cpeb1      | Rattus norvegicus cytoplasmic polyadenylation element binding protein 1 (Cpeb1), mRNA [NM_001106276]                                        | <b>7,141</b> |
| Taf5l      | Rattus norvegicus TAF5-like RNA polymerase II, p300/CBP-associated factor (PCAF)-associated factor (Taf5l), mRNA [NM_001107442]             | <b>7,141</b> |
| Prdm5      | Uncharacterized protein [Source:UniProtKB/TrEMBL;Acc:D3ZRZ9] [ENSRNOT00000009569]                                                           | <b>7,140</b> |

|            |                                                                                                                                                 |       |
|------------|-------------------------------------------------------------------------------------------------------------------------------------------------|-------|
| Isg20      | Rattus norvegicus interferon stimulated exonuclease gene 20 (Isg20), mRNA [NM_001008510]                                                        | 7,138 |
| Mrc2       | Rattus norvegicus mannose receptor, C type 2 (Mrc2), mRNA [NM_001024687]                                                                        | 7,138 |
| 0          | PREDICTED: Rattus norvegicus similar to Emu2 (LOC685612), mRNA [XM_001064529]                                                                   | 7,138 |
| Flcn       | Rattus norvegicus folliculin (Flcn), mRNA [NM_199390]                                                                                           | 7,137 |
| RGD1562165 | PREDICTED: Rattus norvegicus similar to GABA(A) receptor-associated protein like 2 (RGD1562165), partial mRNA [XM_001058517]                    | 7,136 |
| 0          | Unknown                                                                                                                                         | 7,135 |
| Acp5       | Rattus norvegicus acid phosphatase 5, tartrate resistant (Acp5), mRNA [NM_019144]                                                               | 7,135 |
| 0          | Unknown                                                                                                                                         | 7,134 |
| Kiss1r     | Rattus norvegicus KISS1 receptor (Kiss1r), mRNA [NM_023992]                                                                                     | 7,134 |
| 0          | Pyruvate kinase [Source:UniProtKB/TrEMBL;Acc:D3ZH85] [ENSRNOT00000015275]                                                                       | 7,133 |
| Herc6      | PREDICTED: Rattus norvegicus potential ubiquitin ligase (Herc6), mRNA [XM_001064216]                                                            | 7,133 |
| Pet112l    | PREDICTED: Rattus norvegicus PET112-like (yeast) (Pet112l), mRNA [XM_001066526]                                                                 | 7,133 |
| Tmem141    | Rattus norvegicus transmembrane protein 141 (Tmem141), mRNA [NM_001109197]                                                                      | 7,132 |
| Rnf20      | Rattus norvegicus ring finger protein 20 (Rnf20), mRNA [NM_001107929]                                                                           | 7,132 |
| 0          | Unknown                                                                                                                                         | 7,131 |
| Rrh        | Rattus norvegicus retinal pigment epithelium derived rhodopsin homolog (Rrh), mRNA [NM_001107726]                                               | 7,130 |
| 0          | Unknown                                                                                                                                         | 7,129 |
| LOC301816  | PREDICTED: Rattus norvegicus similar to Spindlin-like protein 2 (SPIN-2) (LOC301816), mRNA [XM_229292]                                          | 7,128 |
| RGD1305110 | Rattus norvegicus similar to KIAA1841 protein (RGD1305110), mRNA [NM_001100971]                                                                 | 7,126 |
| Bcl2l2     | Rattus norvegicus Bcl2-like 2 (Bcl2l2), mRNA [NM_021850]                                                                                        | 7,126 |
| Nos1ap     | Rattus norvegicus nitric oxide synthase 1 (neuronal) adaptor protein (Nos1ap), mRNA [NM_138922]                                                 | 7,126 |
| 0          | Homeobox protein cut-like 1 [Source:UniProtKB/Swiss-Prot;Acc:P53565] [ENSRNOT00000059486]                                                       | 7,125 |
| Stx6       | Rattus norvegicus syntaxin 6 (Stx6), mRNA [NM_031665]                                                                                           | 7,125 |
| Rnf168     | Rattus norvegicus ring finger protein 168 (Rnf168), mRNA [NM_001127597]                                                                         | 7,122 |
| Fam105a    | Rattus norvegicus family with sequence similarity 105, member A (Fam105a), mRNA [NM_001037648]                                                  | 7,122 |
| LOC690478  | Rattus norvegicus similar to keratin associated protein 10-7 (LOC690478), mRNA [NM_001109595]                                                   | 7,122 |
| Snx4       | Rattus norvegicus sorting nexin 4 (Snx4), mRNA [NM_001127550]                                                                                   | 7,121 |
| 0          | Uncharacterized protein [Source:UniProtKB/TrEMBL;Acc:D3ZRK3] [ENSRNOT00000059370]                                                               | 7,121 |
| Agpat5     | Rattus norvegicus 1-acylglycerol-3-phosphate O-acyltransferase 5 (lysophosphatidic acid acyltransferase, epsilon) (Agpat5), mRNA [NM_001134744] | 7,121 |
| Ptch1      | Rattus norvegicus patched homolog 1 (Drosophila) (Ptch1), mRNA [NM_053566]                                                                      | 7,120 |
| Alb        | Rattus norvegicus albumin (Alb), mRNA [NM_134326]                                                                                               | 7,119 |
| Jun        | Rattus norvegicus Jun oncogene (Jun), mRNA [NM_021835]                                                                                          | 7,119 |
| Il6st      | Rattus norvegicus interleukin 6 signal transducer (Il6st), mRNA [NM_001008725]                                                                  | 7,119 |

|            |                                                                                                                                           |       |
|------------|-------------------------------------------------------------------------------------------------------------------------------------------|-------|
| Pnpla7     | Rattus norvegicus patatin-like phospholipase domain containing 7 (Pnpla7), mRNA [NM_144738]                                               | 7,119 |
| 0          | Uncharacterized protein [Source:UniProtKB/TrEMBL;Acc:D3ZCG9] [ENSRNOT00000005644]                                                         | 7,118 |
| Gpx7       | Rattus norvegicus glutathione peroxidase 7 (Gpx7), mRNA [NM_001106673]                                                                    | 7,116 |
| Lamc1      | Rattus norvegicus laminin, gamma 1 (Lamc1), mRNA [NM_053966]                                                                              | 7,116 |
| Mpv17l2    | Rattus norvegicus MPV17 mitochondrial membrane protein-like 2 (Mpv17l2), nuclear gene encoding mitochondrial protein, mRNA [NM_001106072] | 7,116 |
| Isy1       | Rattus norvegicus ISY1 splicing factor homolog (S. cerevisiae) (Isy1), mRNA [NM_001014188]                                                | 7,115 |
| Ppp2r1b    | Rattus norvegicus protein phosphatase 2 (formerly 2A), regulatory subunit A, beta isoform (Ppp2r1b), mRNA [NM_001025418]                  | 7,115 |
| Fgf21      | Rattus norvegicus fibroblast growth factor 21 (Fgf21), mRNA [NM_130752]                                                                   | 7,111 |
| Lrrc47     | Rattus norvegicus leucine rich repeat containing 47 (Lrrc47), mRNA [NM_001135666]                                                         | 7,111 |
| Arid4a     | Rattus norvegicus AT rich interactive domain 4A (Rbp1 like) (Arid4a), mRNA [NM_001108029]                                                 | 7,109 |
| Scand1     | Rattus norvegicus SCAN domain-containing 1 (Scand1), mRNA [NM_001108599]                                                                  | 7,108 |
| 0          | Uncharacterized protein [Source:UniProtKB/TrEMBL;Acc:D3ZQF0] [ENSRNOT000000047238]                                                        | 7,108 |
| Il17ra     | Rattus norvegicus interleukin 17 receptor A (Il17ra), mRNA [NM_001107883]                                                                 | 7,106 |
| 0          | Unknown                                                                                                                                   | 7,106 |
| Cdkn2b     | Rattus norvegicus cyclin-dependent kinase inhibitor 2B (p15, inhibits CDK4) (Cdkn2b), mRNA [NM_130812]                                    | 7,106 |
| RGD1561520 | PREDICTED: Rattus norvegicus similar to Ab2-162 (RGD1561520), mRNA [XM_345159]                                                            | 7,105 |
| RGD1305572 | Rattus norvegicus similar to hypothetical protein MGC30618 (RGD1305572), mRNA [NM_001024970]                                              | 7,105 |
| Tmem186    | Rattus norvegicus transmembrane protein 186 (Tmem186), mRNA [NM_001025756]                                                                | 7,104 |
| Kcnq4      | Potassium voltage-gated channel subfamily KQT member 4 [Source:UniProtKB/Swiss-Prot;Acc:Q9JK96] [ENSRNOT00000014231]                      | 7,103 |
| Grk6       | Rattus norvegicus G protein-coupled receptor kinase 6 (Grk6), transcript variant 2, mRNA [NM_001112713]                                   | 7,103 |
| 0          | Unknown                                                                                                                                   | 7,103 |
| 0          | Uncharacterized protein [Source:UniProtKB/TrEMBL;Acc:D4A553] [ENSRNOT00000016227]                                                         | 7,102 |
| Nedd8      | Rattus norvegicus neural precursor cell expressed, developmentally down-regulated 8 (Nedd8), mRNA [NM_138878]                             | 7,102 |
| Alg13      | Rattus norvegicus asparagine-linked glycosylation 13 homolog (S. cerevisiae) (Alg13), mRNA [NM_001013951]                                 | 7,100 |
| Xylt2      | Rattus norvegicus xylosyltransferase II (Xylt2), mRNA [NM_022296]                                                                         | 7,100 |
| Nkiras1    | Rattus norvegicus NFkB inhibitor interacting Ras-like 1 (Nkiras1), mRNA [NM_001107252]                                                    | 7,099 |
| Vps33b     | Rattus norvegicus vacuolar protein sorting 33 homolog B (yeast) (Vps33b), mRNA [NM_022286]                                                | 7,098 |
| Znf804a    | Rattus norvegicus similar to hypothetical protein (LOC295695), mRNA [XM_230042]                                                           | 7,098 |
| Extl1      | Rattus norvegicus exostoses (multiple)-like 1 (Extl1), mRNA [NM_001107985]                                                                | 7,097 |
| 0          | Unknown                                                                                                                                   | 7,097 |
| Olr196     | Rattus norvegicus olfactory receptor 196 (Olr196), mRNA [NM_001000187]                                                                    | 7,095 |
| Crygf      | Rattus norvegicus crystallin, gamma F (Crygf), mRNA [NM_001109557]                                                                        | 7,095 |
| 0          | Unknown                                                                                                                                   | 7,094 |
| 0          | Coiled-coil domain-containing-like [Source:UniProtKB/TrEMBL;Acc:Q5M816] [ENSRNOT00000015782]                                              | 7,093 |

|              |                                                                                                                                                                                                                                                              |       |
|--------------|--------------------------------------------------------------------------------------------------------------------------------------------------------------------------------------------------------------------------------------------------------------|-------|
| 0            | Unknown                                                                                                                                                                                                                                                      | 7,093 |
| Senp6        | Rattus norvegicus SUMO1/sentrin specific peptidase 6 (Senp6), mRNA [NM_001106842]                                                                                                                                                                            | 7,092 |
| Taz          | Rattus norvegicus tafazzin (Taz), nuclear gene encoding mitochondrial protein, mRNA [NM_001025748]                                                                                                                                                           | 7,091 |
| 0            | Unknown                                                                                                                                                                                                                                                      | 7,091 |
| Arl13b       | Rattus norvegicus ADP-ribosylation factor-like 13B (Arl13b), mRNA [NM_001107101]                                                                                                                                                                             | 7,091 |
| Zfp758       | PREDICTED: Rattus norvegicus similar to reduced expression 2 (LOC690559), mRNA [XM_001074805]                                                                                                                                                                | 7,091 |
| Bri3         | Rattus norvegicus brain protein I3 (Bri3), mRNA [NM_001009604]                                                                                                                                                                                               | 7,090 |
| Olr606       | Rattus norvegicus olfactory receptor 606 (Olr606), mRNA [NM_001000927]                                                                                                                                                                                       | 7,090 |
| Cluap1       | Rattus norvegicus clusterin associated protein 1 (Cluap1), mRNA [NM_001014225]                                                                                                                                                                               | 7,088 |
| 0            | Rattus norvegicus similar to Alpha enolase (2-phospho-D-glycerate hydro-lyase) (Non-neural enolase) (NNE) (Enolase 1) (LOC287338), mRNA [XM_220490]                                                                                                          | 7,088 |
| Kif13a       | Rattus norvegicus kinesin family member 13A (Kif13a), mRNA [NM_001107462]                                                                                                                                                                                    | 7,088 |
| RGD1311756   | Rattus norvegicus similar to hypothetical protein FLJ20950 (RGD1311756), mRNA [NM_001173557]                                                                                                                                                                 | 7,087 |
| Rfwd3        | Rattus norvegicus similar to hypothetical protein FLJ34389 (LOC361409), mRNA [XM_341690]                                                                                                                                                                     | 7,086 |
| RGD1311273   | Rattus norvegicus similar to RIKEN cDNA 9530058B02 (RGD1311273), mRNA [NM_001109475]                                                                                                                                                                         | 7,084 |
| Kif5c        | Rattus norvegicus kinesin family member 5C (Kif5c), mRNA [NM_001107730]                                                                                                                                                                                      | 7,083 |
| Eef2k        | Rattus norvegicus eukaryotic elongation factor-2 kinase (Eef2k), mRNA [NM_012947]                                                                                                                                                                            | 7,082 |
| Bdnf         | Rattus norvegicus brain-derived neurotrophic factor (Bdnf), mRNA [NM_012513]                                                                                                                                                                                 | 7,082 |
| 0            | Rattus norvegicus similar to Proteasome activator complex subunit 2 (Proteasome activator 28-beta subunit) (PA28beta) (PA28b) (Activator of multicatalytic protease subunit 2) (11S regulator complex beta subunit) (REG-beta) (LOC304754), mRNA [XM_222590] | 7,081 |
| Lat          | Rattus norvegicus linker for activation of T cells (Lat), mRNA [NM_030853]                                                                                                                                                                                   | 7,081 |
| Heca         | Rattus norvegicus headcase homolog (Drosophila) (Heca), mRNA [NM_001107514]                                                                                                                                                                                  | 7,079 |
| Socs4        | Rattus norvegicus suppressor of cytokine signaling 4 (Socs4), mRNA [NM_001107256]                                                                                                                                                                            | 7,078 |
| Gjc3         | Gap junction protein [Source:UniProtKB/TrEMBL;Acc:Q80XF8] [ENSRNOT00000001797]                                                                                                                                                                               | 7,077 |
| 0            | Rattus norvegicus similar to glyceraldehyde-3-phosphate dehydrogenase (LOC310648), mRNA [XM_227423]                                                                                                                                                          | 7,076 |
| LOC100366273 | Uncharacterized protein [Source:UniProtKB/TrEMBL;Acc:D4A1X2] [ENSRNOT00000014629]                                                                                                                                                                            | 7,076 |
| Bicc1        | Rattus norvegicus bicaudal C homolog 1 (Drosophila) (Bicc1), mRNA [NM_001108531]                                                                                                                                                                             | 7,076 |
| 0            | Unknown                                                                                                                                                                                                                                                      | 7,075 |
| Ubr5         | E3 ubiquitin-protein ligase UBR5 [Source:UniProtKB/Swiss-Prot;Acc:Q62671] [ENSRNOT00000009115]                                                                                                                                                               | 7,074 |
| 0            | Unknown                                                                                                                                                                                                                                                      | 7,074 |
| Sec61a1      | Rattus norvegicus Sec61 alpha 1 subunit (S. cerevisiae) (Sec61a1), mRNA [NM_199256]                                                                                                                                                                          | 7,072 |
| LOC691141    | Rattus norvegicus hypothetical protein LOC691141 (LOC691141), mRNA [NM_001109624]                                                                                                                                                                            | 7,072 |
| 0            | Uncharacterized protein [Source:UniProtKB/TrEMBL;Acc:D4A6G8] [ENSRNOT00000048964]                                                                                                                                                                            | 7,071 |
| Egfl8        | Rattus norvegicus EGF-like-domain, multiple 8 (Egfl8), transcript variant 1, mRNA [NM_001004070]                                                                                                                                                             | 7,071 |

|            |                                                                                                                                                                                                                               |       |
|------------|-------------------------------------------------------------------------------------------------------------------------------------------------------------------------------------------------------------------------------|-------|
| Olr1       | Rattus norvegicus oxidized low density lipoprotein (lectin-like) receptor 1 (Olr1), mRNA [NM_133306]                                                                                                                          | 7,071 |
| LOC678769  | Rattus norvegicus similar to Cysteine protease ATG4A (Autophagy-related protein 4 homolog A) (Autophagin-2) (Autophagy-related cysteine endopeptidase 2) (AUT-like 2 cysteine endopeptidase) (LOC678769), mRNA [NM_001126298] | 7,070 |
| Gnptg      | Rattus norvegicus N-acetylglucosamine-1-phosphate transferase, gamma subunit (Gnptg), mRNA [NM_001100493]                                                                                                                     | 7,070 |
| Zmynd19    | Rattus norvegicus zinc finger, MYND-type containing 19 (Zmynd19), mRNA [NM_198770]                                                                                                                                            | 7,070 |
| 0          | Rattus norvegicus LOC361297 (LOC361297), mRNA [XM_341582]                                                                                                                                                                     | 7,069 |
| Psme2      | Rattus norvegicus proteasome (prosome, macropain) activator subunit 2 (Psme2), mRNA [NM_017257]                                                                                                                               | 7,068 |
| Adam8      | Uncharacterized protein [Source:UniProtKB/TrEMBL;Acc:D3ZB52] [ENSRNOT00000024369]                                                                                                                                             | 7,067 |
| Ccng2      | Rattus norvegicus cyclin G2 (Ccng2), mRNA [NM_001105725]                                                                                                                                                                      | 7,066 |
| 0          | Unknown                                                                                                                                                                                                                       | 7,065 |
| RGD1566085 | Uncharacterized protein [Source:UniProtKB/TrEMBL;Acc:D3Z8P5] [ENSRNOT00000051678]                                                                                                                                             | 7,064 |
| 0          | Unknown                                                                                                                                                                                                                       | 7,064 |
| Dcn        | Rattus norvegicus decorin (Dcn), mRNA [NM_024129]                                                                                                                                                                             | 7,064 |
| Guf1       | Rattus norvegicus GUF1 GTPase homolog (S. cerevisiae) (Guf1), mRNA [NM_001107215]                                                                                                                                             | 7,063 |
| Magel2     | RCG63550Uncharacterized protein [Source:UniProtKB/TrEMBL;Acc:D3ZTL5] [ENSRNOT00000013483]                                                                                                                                     | 7,062 |
| Kif2a      | Kinesin-like protein KIF2A [Source:UniProtKB/Swiss-Prot;Acc:Q9WV63] [ENSRNOT00000019225]                                                                                                                                      | 7,062 |
| Recql4     | Rattus norvegicus RecQ protein-like 4 (Recql4), mRNA [NM_001130494]                                                                                                                                                           | 7,061 |
| Acvr2a     | Rattus norvegicus activin A receptor, type IIA (Acvr2a), mRNA [NM_031571]                                                                                                                                                     | 7,061 |
| Slc5a5     | Rattus norvegicus solute carrier family 5 (sodium iodide symporter), member 5 (Slc5a5), mRNA [NM_052983]                                                                                                                      | 7,061 |
| RGD1560666 | PREDICTED: Rattus norvegicus similar to KIAA1280 protein (RGD1560666), mRNA [XM_001069576]                                                                                                                                    | 7,060 |
| Slc38a2    | Rattus norvegicus solute carrier family 38, member 2 (Slc38a2), mRNA [NM_181090]                                                                                                                                              | 7,059 |
| Bhlha9     | Uncharacterized protein [Source:UniProtKB/TrEMBL;Acc:D3ZY30] [ENSRNOT00000032934]                                                                                                                                             | 7,058 |
| LOC293103  | Rattus norvegicus similar to RIKEN cDNA 0610007P06 (LOC293103), mRNA [NM_001013897]                                                                                                                                           | 7,058 |
| Asf1b      | Rattus norvegicus ASF1 anti-silencing function 1 homolog B (S. cerevisiae) (Asf1b), mRNA [NM_001107160]                                                                                                                       | 7,058 |
| Cadm4      | Rattus norvegicus cell adhesion molecule 4 (Cadm4), mRNA [NM_001047107]                                                                                                                                                       | 7,056 |
| 0          | Unknown                                                                                                                                                                                                                       | 7,056 |
| 0          | Unknown                                                                                                                                                                                                                       | 7,056 |
| Cdc42ep1   | Rattus norvegicus CDC42 effector protein (Rho GTPase binding) 1 (Cdc42ep1), mRNA [NM_001079700]                                                                                                                               | 7,054 |
| 0          | Unknown                                                                                                                                                                                                                       | 7,054 |
| Mapk8ip1   | Rattus norvegicus mitogen-activated protein kinase 8 interacting protein 1 (Mapk8ip1), mRNA [NM_053777]                                                                                                                       | 7,054 |
| Mcl1       | Rattus norvegicus myeloid cell leukemia sequence 1 (Mcl1), nuclear gene encoding mitochondrial protein, mRNA [NM_021846]                                                                                                      | 7,053 |
| Clcc1      | Rattus norvegicus chloride channel CLIC-like 1 (Clcc1), mRNA [NM_133414]                                                                                                                                                      | 7,052 |
| 0          | Unknown                                                                                                                                                                                                                       | 7,050 |
| Rpa1       | Rattus norvegicus replication protein A1 (Rpa1), mRNA [NM_001047843]                                                                                                                                                          | 7,050 |

|            |                                                                                                                                                                                                                                                |              |
|------------|------------------------------------------------------------------------------------------------------------------------------------------------------------------------------------------------------------------------------------------------|--------------|
| Zfp169     | Uncharacterized protein [Source:UniProtKB/TrEMBL;Acc:D3Z9A8] [ENSRNOT00000022932]                                                                                                                                                              | <b>7,049</b> |
| 0          | BC030489 Anln protein {Mus musculus} (exp=-1; wgp=0; cg=0), partial (14%) [TC595131]                                                                                                                                                           | <b>7,048</b> |
| Zbtb1      | Rattus norvegicus zinc finger and BTB domain containing 1 (Zbtb1), mRNA [NM_001004444]                                                                                                                                                         | <b>7,047</b> |
| 0          | Unknown                                                                                                                                                                                                                                        | <b>7,047</b> |
| LOC679983  | AMGNNUC:URRG1-00065-A12-A urrg1 (14046) Rattus norvegicus cDNA clone urrg1-00065-a12 5', mRNA sequence [CB547742]                                                                                                                              | <b>7,047</b> |
| 0          | Unknown                                                                                                                                                                                                                                        | <b>7,046</b> |
| Crebl2     | Rattus norvegicus cAMP responsive element binding protein-like 2 (Crebl2), mRNA [NM_001015027]                                                                                                                                                 | <b>7,046</b> |
| 0          | Unknown                                                                                                                                                                                                                                        | <b>7,046</b> |
| 0          | Unknown                                                                                                                                                                                                                                        | <b>7,046</b> |
| Itga10     | Rattus norvegicus integrin, alpha 10 (Itga10), mRNA [NM_001107699]                                                                                                                                                                             | <b>7,045</b> |
| Pou2af1    | Rattus norvegicus POU class 2 associating factor 1 (Pou2af1), mRNA [NM_001109599]                                                                                                                                                              | <b>7,044</b> |
| 0          | Unknown                                                                                                                                                                                                                                        | <b>7,044</b> |
| Dbnl       | Rattus norvegicus drebrin-like (Dbnl), mRNA [NM_031352]                                                                                                                                                                                        | <b>7,044</b> |
| Ndufaf3    | Rattus norvegicus NADH dehydrogenase (ubiquinone) 1 alpha subcomplex, assembly factor 3 (Ndufaf3), nuclear gene encoding mitochondrial protein, transcript variant 1, mRNA [NM_020080]                                                         | <b>7,042</b> |
| 0          | Unknown                                                                                                                                                                                                                                        | <b>7,039</b> |
| 0          | Unknown                                                                                                                                                                                                                                        | <b>7,037</b> |
| Fam5c      | Rattus norvegicus family with sequence similarity 5, member C (Fam5c), mRNA [NM_173121]                                                                                                                                                        | <b>7,036</b> |
| Ap2a2      | Rattus norvegicus adaptor-related protein complex 2, alpha 2 subunit (Ap2a2), mRNA [NM_031008]                                                                                                                                                 | <b>7,035</b> |
| Ppp1r1c    | Rattus norvegicus protein phosphatase 1, regulatory (inhibitor) subunit 1C (Ppp1r1c), mRNA [NM_001109200]                                                                                                                                      | <b>7,035</b> |
| Krtap9-5   | PREDICTED: Rattus norvegicus hypothetical protein LOC680468 (LOC680468), mRNA [XM_001057319]                                                                                                                                                   | <b>7,035</b> |
| Ddit4      | Rattus norvegicus DNA-damage-inducible transcript 4 (Ddit4), mRNA [NM_080906]                                                                                                                                                                  | <b>7,034</b> |
| LOC687536  | PREDICTED: Rattus norvegicus similar to Forkhead box protein F1 (Forkhead-related protein FKHL5) (Forkhead-related transcription factor 1) (FREAC-1) (Hepatocyte nuclear factor 3 forkhead homolog 8) (HFH-8) (LOC687536), mRNA [XM_001079002] | <b>7,033</b> |
| RGD1560936 | PREDICTED: Rattus norvegicus similar to 60S ribosomal protein L13 (RGD1560936), mRNA [XM_219309]                                                                                                                                               | <b>7,033</b> |
| Cdo1       | Rattus norvegicus cysteine dioxygenase, type I (Cdo1), mRNA [NM_052809]                                                                                                                                                                        | <b>7,033</b> |
| 0          | Unknown                                                                                                                                                                                                                                        | <b>7,033</b> |
| Stard3     | Rattus norvegicus StAR-related lipid transfer (START) domain containing 3 (Stard3), mRNA [NM_001014229]                                                                                                                                        | <b>7,033</b> |
| Sms        | Rattus norvegicus spermine synthase (Sms), mRNA [NM_001033899]                                                                                                                                                                                 | <b>7,032</b> |
| RGD1307325 | Rattus norvegicus similar to RIKEN cDNA 4933411K20 (RGD1307325), mRNA [NM_001014001]                                                                                                                                                           | <b>7,032</b> |
| Pno1       | Rattus norvegicus partner of NOB1 homolog (S. cerevisiae) (Pno1), mRNA [NM_199083]                                                                                                                                                             | <b>7,032</b> |
| RGD1564469 | Uncharacterized protein [Source:UniProtKB/TrEMBL;Acc:D3ZJT4] [ENSRNOT00000040909]                                                                                                                                                              | <b>7,031</b> |
| 0          | Unknown                                                                                                                                                                                                                                        | <b>7,030</b> |
| 0          | Unknown                                                                                                                                                                                                                                        | <b>7,030</b> |

|           |                                                                                                                                                         |       |
|-----------|---------------------------------------------------------------------------------------------------------------------------------------------------------|-------|
| Hnrpd     | Rattus norvegicus heterogeneous nuclear ribonucleoprotein D (Hnrpd), transcript variant 1, mRNA [NM_024404]                                             | 7,030 |
| 0         | CTGE5_MOUSE (Q8R311) Cutaneous T-cell lymphoma-associated antigen 5 homolog (cTAGE-5 protein) (Meningioma-expressed antigen 6), partial (9%) [TC630795] | 7,028 |
| 0         | Unknown                                                                                                                                                 | 7,028 |
| 0         | Unknown                                                                                                                                                 | 7,027 |
| Dcun1d2   | Rattus norvegicus DCN1, defective in cullin neddylation 1, domain containing 2 (S. cerevisiae) (Dcun1d2), mRNA [NM_001134798]                           | 7,025 |
| Fam160a2  | Rattus norvegicus family with sequence similarity 160, member A2 (Fam160a2), mRNA [NM_001005538]                                                        | 7,025 |
| Gnb3      | Rattus norvegicus guanine nucleotide binding protein (G protein), beta polypeptide 3 (Gnb3), mRNA [NM_021858]                                           | 7,025 |
| Fam125a   | Rattus norvegicus family with sequence similarity 125, member A (Fam125a), mRNA [NM_199375]                                                             | 7,023 |
| Lrrc23    | Rattus norvegicus leucine rich repeat containing 23 (Lrrc23), mRNA [NM_001013165]                                                                       | 7,023 |
| Nudt4     | Rattus norvegicus nudix (nucleoside diphosphate linked moiety X)-type motif 4 (Nudt4), mRNA [NM_053598]                                                 | 7,022 |
| Olr1088   | PREDICTED: Rattus norvegicus olfactory receptor 1088 (Olr1088), mRNA [XM_001077880]                                                                     | 7,020 |
| Olr399    | Rattus norvegicus olfactory receptor 399 (Olr399), mRNA [NM_001000560]                                                                                  | 7,019 |
| 0         | Unknown                                                                                                                                                 | 7,019 |
| 0         | Unknown                                                                                                                                                 | 7,016 |
| Cyp2a2    | Rattus norvegicus cytochrome P450, family 2, subfamily a, polypeptide 2 (Cyp2a2), mRNA [NM_012693]                                                      | 7,015 |
| Amacr     | Rattus norvegicus alpha-methylacyl-CoA racemase (Amacr), nuclear gene encoding mitochondrial protein, mRNA [NM_012816]                                  | 7,013 |
| Slc38a10  | Putative uncharacterized protein RGD1306356Uncharacterized protein [Source:UniProtKB/TrEMBL;Acc:D3ZH43] [ENSRNOT00000006225]                            | 7,012 |
| Hspb8     | Rattus norvegicus heat shock protein B8 (Hspb8), mRNA [NM_053612]                                                                                       | 7,012 |
| Kcnk10    | Rattus norvegicus potassium channel, subfamily K, member 10 (Kcnk10), mRNA [NM_023096]                                                                  | 7,011 |
| Rhobtb2   | Rattus norvegicus Rho-related BTB domain containing 2 (Rhobtb2), mRNA [NM_001013133]                                                                    | 7,009 |
| LOC685398 | PREDICTED: Rattus norvegicus similar to 1A6/DRIM (down-regulated in metastasis) interacting protein (LOC685398), mRNA [XM_001063635]                    | 7,009 |
| 0         | AGENCOURT_26629706 NIH_MGC_253 Rattus norvegicus cDNA clone IMAGE:7305279 5', mRNA sequence [CO385661]                                                  | 7,009 |
| Trim33    | Uncharacterized protein [Source:UniProtKB/TrEMBL;Acc:D3ZUK4] [ENSRNOT000000025600]                                                                      | 7,007 |
| Lig4      | Rattus norvegicus ligase IV, DNA, ATP-dependent (Lig4), mRNA [NM_001106095]                                                                             | 7,007 |
| Fam136a   | Rattus norvegicus family with sequence similarity 136, member A (Fam136a), mRNA [NM_001106605]                                                          | 7,007 |
| Sesn3     | Rattus norvegicus sestrin 3 (Sesn3), mRNA [NM_001108125]                                                                                                | 7,006 |
| Ccdc12    | Rattus norvegicus coiled-coil domain containing 12 (Ccdc12), mRNA [NM_001108783]                                                                        | 7,006 |
| LOC498685 | Rattus norvegicus similar to UPF0308 protein C9orf21 (LOC498685), mRNA [NM_001109114]                                                                   | 7,005 |
| Zfp639    | Rattus norvegicus zinc finger protein 639 (Zfp639), mRNA [NM_001080907]                                                                                 | 7,004 |
| Gpc4      | Rattus norvegicus glypican 4 (Gpc4), mRNA [NM_001014108]                                                                                                | 7,004 |
| Tfdp2     | Rattus norvegicus transcription factor Dp-2 (E2F dimerization partner 2) (Tfdp2), mRNA [NM_001106847]                                                   | 7,004 |
| Cadps2    | PREDICTED: Rattus norvegicus Ca <sup>++</sup> -dependent secretion activator 2, transcript variant 1 (Cadps2), mRNA [XM_001060172]                      | 7,003 |
| Xkr7      | Rattus norvegicus XK, Kell blood group complex subunit-related family, member 7 (Xkr7), mRNA [NM_001012092]                                             | 7,002 |



|            |                                                                                                                                                                          |       |
|------------|--------------------------------------------------------------------------------------------------------------------------------------------------------------------------|-------|
| Mrpl16     | Rattus norvegicus mitochondrial ribosomal protein L16 (Mrpl16), nuclear gene encoding mitochondrial protein, mRNA [NM_001009647]                                         | 7,002 |
| Slc25a33   | Rattus norvegicus solute carrier family 25, member 33 (Slc25a33), nuclear gene encoding mitochondrial protein, mRNA [NM_001127574]                                       | 7,002 |
| 0          | SEC24 related gene family, member D ( <i>S. cerevisiae</i> ) (Predicted), isoform CRA_bUncharacterized protein [Source:UniProtKB/TrEMBL;Acc:D3ZTC8] [ENSRNOT00000020433] | 7,001 |
| RGD1564342 | Uncharacterized protein [Source:UniProtKB/TrEMBL;Acc:D3ZFA2] [ENSRNOT00000030991]                                                                                        | 7,001 |
| Pcdhga8    | Rattus norvegicus protocadherin gamma subfamily A, 8 (Pcdhga8), mRNA [NM_001037156]                                                                                      | 7,001 |
| Rpp30      | Rattus norvegicus ribonuclease P/MRP 30 subunit (human) (Rpp30), mRNA [NM_001191083]                                                                                     | 7,000 |
| Dennd2a    | Uncharacterized protein [Source:UniProtKB/TrEMBL;Acc:D3ZLQ1] [ENSRNOT00000034549]                                                                                        | 7,000 |
| Abhd1      | Rattus norvegicus abhydrolase domain containing 1 (Abhd1), mRNA [NM_001008520]                                                                                           | 7,000 |
| 0          | Unknown                                                                                                                                                                  | 6,999 |
| 0          | FM101283 etnofat Rattus norvegicus cDNA clone etnofatP0059F08 5', mRNA sequence [FM101283]                                                                               | 6,998 |
| 0          | set=Set beta isoform {alternatively spliced} [rats, neonatal kidney, mRNA, 2026 nt]. [S68987]                                                                            | 6,998 |
| Ankrd34b   | Rattus norvegicus ankyrin repeat domain 34B (Ankrd34b), mRNA [NM_001109174]                                                                                              | 6,997 |
| Lrrc4      | Rattus norvegicus leucine rich repeat containing 4 (Lrrc4), mRNA [NM_001037336]                                                                                          | 6,997 |
| Gpr101     | Rattus norvegicus G protein-coupled receptor 101 (Gpr101), mRNA [NM_001108258]                                                                                           | 6,996 |
| Ddx21      | Rattus norvegicus DEAD (Asp-Glu-Ala-Asp) box polypeptide 21 (Ddx21), mRNA [NM_001037201]                                                                                 | 6,995 |
| Gna13      | Rattus norvegicus guanine nucleotide binding protein (G protein), alpha 13 (Gna13), mRNA [NM_001013119]                                                                  | 6,995 |
| Defb36     | Rattus norvegicus defensin beta 36 (Defb36), mRNA [NM_001037515]                                                                                                         | 6,995 |
| LOC688869  | Rattus norvegicus similar to cytochrome c oxidase, subunit VIb polypeptide 1 (LOC688869), nuclear gene encoding mitochondrial protein, mRNA [NM_001145273]               | 6,994 |
| Lsm6       | Rattus norvegicus LSM6 homolog, U6 small nuclear RNA associated ( <i>S. cerevisiae</i> ) (Lsm6), mRNA [NM_001126085]                                                     | 6,992 |
| Ctsh       | Rattus norvegicus cathepsin H (Ctsh), mRNA [NM_012939]                                                                                                                   | 6,992 |
| Phf3       | Rattus norvegicus PHD finger protein 3 (Phf3), mRNA [NM_001108791]                                                                                                       | 6,992 |
| 0          | Unknown                                                                                                                                                                  | 6,991 |
| Btbd17     | Rattus norvegicus BTB (POZ) domain containing 17 (Btbd17), mRNA [NM_001134534]                                                                                           | 6,991 |
| Znf498     | Rattus norvegicus zinc finger protein 498 (Znf498), mRNA [NM_001108851]                                                                                                  | 6,991 |
| Atp13a2    | Rattus norvegicus ATPase type 13A2 (Atp13a2), mRNA [NM_001173432]                                                                                                        | 6,991 |
| Pdlim2     | Rattus norvegicus PDZ and LIM domain 2 (Pdlim2), mRNA [NM_001007622]                                                                                                     | 6,990 |
| Rad51l3    | Rattus norvegicus RAD51-like 3 ( <i>S. cerevisiae</i> ) (Rad51l3), mRNA [NM_001107029]                                                                                   | 6,988 |
| Nat14      | Rattus norvegicus N-acetyltransferase 14 (Nat14), mRNA [NM_001108466]                                                                                                    | 6,988 |
| Mterf      | Rattus norvegicus mitochondrial transcription termination factor (Mterf), nuclear gene encoding mitochondrial protein, mRNA [NM_053499]                                  | 6,987 |
| Prpsap1    | Rattus norvegicus phosphoribosyl pyrophosphate synthetase-associated protein 1 (Prpsap1), mRNA [NM_022545]                                                               | 6,987 |
| 0          | Rattus norvegicus similar to glyceraldehyde-3-phosphate dehydrogenase (phosphorylating) (EC 1.2.1.12) - mouse (LOC301496), mRNA [XM_237274]                              | 6,987 |

|            |                                                                                                                                                                                                                      |              |
|------------|----------------------------------------------------------------------------------------------------------------------------------------------------------------------------------------------------------------------|--------------|
| Msra       | Rattus norvegicus methionine sulfoxide reductase A (Msra), mRNA [NM_053307]                                                                                                                                          | <b>6,986</b> |
| Mylip      | Rattus norvegicus myosin regulatory light chain interacting protein (Mylip), mRNA [NM_001107344]                                                                                                                     | <b>6,986</b> |
| 0          | Beta-crystallin A3Beta-crystallin A3, isoform A1, Delta4 formBeta-crystallin A3, isoform A1, Delta7 formBeta-crystallin A3, isoform A1, Delta8 form<br>[Source:UniProtKB/Swiss-Prot;Acc:P14881] [ENSRNOT00000067029] | <b>6,985</b> |
| 0          | Uncharacterized protein [Source:UniProtKB/TrEMBL;Acc:D3ZKT9] [ENSRNOT00000066171]                                                                                                                                    | <b>6,985</b> |
| Gpatch4    | Rattus norvegicus G patch domain containing 4 (Gpatch4), mRNA [NM_001024979]                                                                                                                                         | <b>6,985</b> |
| Lhfp15     | Rattus norvegicus lipoma HMGIC fusion partner-like 5 (Lhfp15), mRNA [NM_001013906]                                                                                                                                   | <b>6,985</b> |
| Znf608     | Rattus norvegicus zinc finger protein 608 (Znf608), mRNA [NM_001107378]                                                                                                                                              | <b>6,983</b> |
| Arid3b     | Rattus norvegicus AT rich interactive domain 3B (Bright like) (Arid3b), mRNA [NM_001109001]                                                                                                                          | <b>6,981</b> |
| Ctsll3     | RCG24317, isoform CRA_aUncharacterized protein [Source:UniProtKB/TrEMBL;Acc:D3ZJV2] [ENSRNOT00000061398]                                                                                                             | <b>6,980</b> |
| 0          | Unknown                                                                                                                                                                                                              | <b>6,980</b> |
| Arpp19     | Rattus norvegicus cAMP-regulated phosphoprotein 19 (Arpp19), mRNA [NM_031660]                                                                                                                                        | <b>6,980</b> |
| Syt12      | Rattus norvegicus synaptotagmin XII (Syt12), mRNA [NM_138835]                                                                                                                                                        | <b>6,980</b> |
| Grik1      | Rattus norvegicus glutamate receptor, ionotropic, kainate 1 (Grik1), transcript variant 2, mRNA [NM_017241]                                                                                                          | <b>6,978</b> |
| Loh12cr1   | Rattus norvegicus loss of heterozygosity, 12, chromosomal region 1 homolog (human) (Loh12cr1), mRNA [NM_001108650]                                                                                                   | <b>6,978</b> |
| Snx20      | Rattus norvegicus sorting nexin 20 (Snx20), mRNA [NM_001024999]                                                                                                                                                      | <b>6,975</b> |
| 0          | Unknown                                                                                                                                                                                                              | <b>6,974</b> |
| LOC294497  | Rattus norvegicus similar to double homeobox, 4; double homeobox protein 4 (LOC294497), mRNA [XM_228268]                                                                                                             | <b>6,973</b> |
| Eif4b      | Rattus norvegicus eukaryotic translation initiation factor 4B (Eif4b), mRNA [NM_001008324]                                                                                                                           | <b>6,973</b> |
| RGD1307554 | Rattus norvegicus similar to CG16812-PA (RGD1307554), mRNA [NM_001109664]                                                                                                                                            | <b>6,972</b> |
| RGD1565641 | Rattus norvegicus RGD1565641 (RGD1565641), mRNA [NM_001109179]                                                                                                                                                       | <b>6,970</b> |
| Mfsd5      | Rattus norvegicus major facilitator superfamily domain containing 5 (Mfsd5), mRNA [NM_001126282]                                                                                                                     | <b>6,969</b> |
| Pnmal1     | Rattus norvegicus PNMA-like 1 (Pnmal1), mRNA [NM_001108473]                                                                                                                                                          | <b>6,968</b> |
| Ppp1r16a   | Rattus norvegicus protein phosphatase 1, regulatory (inhibitor) subunit 16A (Ppp1r16a), mRNA [NM_001130566]                                                                                                          | <b>6,968</b> |
| RGD1559904 | Rattus norvegicus similar to mKIAA1429 protein (RGD1559904), mRNA [NM_001107915]                                                                                                                                     | <b>6,968</b> |
| Tpd52l1    | Rattus norvegicus tumor protein D52-like 1 (Tpd52l1), mRNA [NM_001044295]                                                                                                                                            | <b>6,968</b> |
| 0          | Rattus norvegicus TL0ABA19YF11 mRNA sequence. [FQ210991]                                                                                                                                                             | <b>6,967</b> |
| Cacng6     | Rattus norvegicus calcium channel, voltage-dependent, gamma subunit 6 (Cacng6), mRNA [NM_080694]                                                                                                                     | <b>6,967</b> |
| Cacna1c    | Rattus norvegicus calcium channel, voltage-dependent, L type, alpha 1C subunit (Cacna1c), mRNA [NM_012517]                                                                                                           | <b>6,966</b> |
| LOC680155  | Uncharacterized protein [Source:UniProtKB/TrEMBL;Acc:D3ZXU7] [ENSRNOT00000020271]                                                                                                                                    | <b>6,966</b> |
| Anapc13    | Rattus norvegicus anaphase promoting complex subunit 13 (Anapc13), mRNA [NM_001173983]                                                                                                                               | <b>6,966</b> |
| LOC686108  | PREDICTED: Rattus norvegicus hypothetical protein LOC686108 (LOC686108), mRNA [XM_002729139]                                                                                                                         | <b>6,964</b> |
| RGD1564420 | Uncharacterized protein [Source:UniProtKB/TrEMBL;Acc:D4AEB6] [ENSRNOT00000013315]                                                                                                                                    | <b>6,962</b> |
| Trim39     | Rattus norvegicus tripartite motif-containing 39 (Trim39), mRNA [NM_213562]                                                                                                                                          | <b>6,961</b> |

|            |                                                                                                                                                    |              |
|------------|----------------------------------------------------------------------------------------------------------------------------------------------------|--------------|
| 0          | FM135825 etnokid Rattus norvegicus cDNA clone etnokidP0036F18 5', mRNA sequence [FM135825]                                                         | <b>6,958</b> |
| Mmaa       | Rattus norvegicus methylmalonic aciduria (cobalamin deficiency) cblA type (Mmaa), nuclear gene encoding mitochondrial protein, mRNA [NM_001106174] | <b>6,957</b> |
| Ubfd1      | Rattus norvegicus ubiquitin family domain containing 1 (Ubfd1), mRNA [NM_001034911]                                                                | <b>6,956</b> |
| 0          | Unknown                                                                                                                                            | <b>6,954</b> |
| RGD1565972 | Rattus norvegicus similar to hypothetical protein 4932411G14 (RGD1565972), mRNA [NM_001134606]                                                     | <b>6,954</b> |
| LOC500354  | Rattus norvegicus similar to C030030A07Rik protein (LOC500354), mRNA [NM_001037797]                                                                | <b>6,953</b> |
| Fastkd5    | PREDICTED: Rattus norvegicus similar to hypothetical protein FLJ13149 (RGD1563839), miscRNA [XR_085786]                                            | <b>6,953</b> |
| Mettl14    | Rattus norvegicus methyltransferase like 14 (Mettl14), mRNA [NM_001106470]                                                                         | <b>6,951</b> |
| Oaz2       | Rattus norvegicus ornithine decarboxylase antizyme 2 (Oaz2), mRNA [NM_001109899]                                                                   | <b>6,950</b> |
| Vom2r24    | Rattus norvegicus vomeronasal 2 receptor, 24 (Vom2r24), mRNA [NM_001099493]                                                                        | <b>6,950</b> |
| Rictor     | PREDICTED: Rattus norvegicus RPTOR independent companion of MTOR, complex 2 (Rictor), mRNA [XM_226812]                                             | <b>6,950</b> |
| LOC684996  | Rattus norvegicus similar to chromosome 7 open reading frame 11 (LOC684996), mRNA [NM_001109452]                                                   | <b>6,949</b> |
| Hnrnpl     | Rattus norvegicus heterogeneous nuclear ribonucleoprotein L (Hnrnpl), transcript variant 1, mRNA [NM_001134760]                                    | <b>6,946</b> |
| Prosapip1  | Rattus norvegicus ProSAPiP1 protein (Prosapip1), mRNA [NM_172022]                                                                                  | <b>6,946</b> |
| Magi1      | Rattus norvegicus membrane associated guanylate kinase, WW and PDZ domain containing 1 (Magi1), mRNA [NM_001030045]                                | <b>6,946</b> |
| Tmem161a   | Rattus norvegicus transmembrane protein 161A (Tmem161a), mRNA [NM_001108874]                                                                       | <b>6,946</b> |
| LOC362473  | PREDICTED: Rattus norvegicus similar to Elongation factor 1-gamma (EF-1-gamma) (eEF-1B gamma) (LOC362473), miscRNA [XR_008347]                     | <b>6,944</b> |
| Rtp3       | Rattus norvegicus receptor (chemosensory) transporter protein 3 (Rtp3), mRNA [NM_001108190]                                                        | <b>6,943</b> |
| Atp6v1a    | Rattus norvegicus ATPase, H <sup>+</sup> transporting, lysosomal V1 subunit A (Atp6v1a), mRNA [NM_001108318]                                       | <b>6,943</b> |
| 0          | pleiomorphic adenoma gene-like 2 [Source:RefSeq peptide;Acc:NP_001099998] [ENSRNOT00000013383]                                                     | <b>6,942</b> |
| Olr1414    | Rattus norvegicus olfactory receptor 1414 (Olr1414), mRNA [NM_001000782]                                                                           | <b>6,941</b> |
| 0          | Unknown                                                                                                                                            | <b>6,940</b> |
| Gin1       | Rattus norvegicus gypsy retrotransposon integrase 1 (Gin1), mRNA [NM_001025012]                                                                    | <b>6,939</b> |
| Mcm4       | Rattus norvegicus minichromosome maintenance complex component 4 (Mcm4), mRNA [NM_033651]                                                          | <b>6,939</b> |
| RGD1306730 | Rattus norvegicus similar to cDNA sequence BC025641 (RGD1306730), mRNA [NM_001039608]                                                              | <b>6,939</b> |
| Zfp414     | Rattus norvegicus zinc finger protein 414 (Zfp414), mRNA [NM_001009664]                                                                            | <b>6,939</b> |
| Zdhhc12    | Rattus norvegicus zinc finger, DHHC-type containing 12 (Zdhhc12), mRNA [NM_001013239]                                                              | <b>6,938</b> |
| Itpka      | Rattus norvegicus inositol 1,4,5-trisphosphate 3-kinase A (Itpka), mRNA [NM_031045]                                                                | <b>6,937</b> |
| Grem2      | Rattus norvegicus gremlin 2, cysteine knot superfamily, homolog (Xenopus laevis) (Grem2), mRNA [NM_001105974]                                      | <b>6,936</b> |
| 0          | Unknown                                                                                                                                            | <b>6,936</b> |
| 0          | Unknown                                                                                                                                            | <b>6,935</b> |
| RGD1310495 | PREDICTED: Rattus norvegicus similar to KIAA1919 protein (RGD1310495), mRNA [XM_001063192]                                                         | <b>6,935</b> |
| R3hdml     | Rattus norvegicus R3H domain (binds single-stranded nucleic acids) containing-like (R3hdml), mRNA [NM_001108962]                                   | <b>6,932</b> |

|            |                                                                                                                                                           |              |
|------------|-----------------------------------------------------------------------------------------------------------------------------------------------------------|--------------|
| Cox6b2     | Rattus norvegicus cytochrome c oxidase subunit VIb polypeptide 2 (Cox6b2), mRNA [NM_001039085]                                                            | <b>6,931</b> |
| RGD1304595 | Rattus norvegicus similar to RIKEN cDNA 6330416G13 gene (RGD1304595), mRNA [NM_001106661]                                                                 | <b>6,931</b> |
| LOC686567  | PREDICTED: Rattus norvegicus similar to Epiplakin (LOC686567), mRNA [XM_001074770]                                                                        | <b>6,931</b> |
| Cyp2d4     | Rattus norvegicus cytochrome P450, family 2, subfamily d, polypeptide 4 (Cyp2d4), mRNA [NM_138515]                                                        | <b>6,930</b> |
| Chmp4b1    | PREDICTED: Rattus norvegicus similar to Charged multivesicular body protein 4b (Chromatin-modifying protein 4b) (CHMP4b) (LOC679886), mRNA [XM_002726346] | <b>6,930</b> |
| Tg         | Rattus norvegicus thyroglobulin (Tg), mRNA [NM_030988]                                                                                                    | <b>6,929</b> |
| Mapk3      | Rattus norvegicus mitogen activated protein kinase 3 (Mapk3), mRNA [NM_017347]                                                                            | <b>6,929</b> |
| Ehd2       | Rattus norvegicus EH-domain containing 2 (Ehd2), mRNA [NM_001024897]                                                                                      | <b>6,928</b> |
| 0          | Unknown                                                                                                                                                   | <b>6,928</b> |
| RGD1561241 | PREDICTED: Rattus norvegicus similar to Mblk1-related protein-1 (RGD1561241), mRNA [XM_001058603]                                                         | <b>6,928</b> |
| Pappa      | Rattus norvegicus pregnancy-associated plasma protein A (Pappa), mRNA [NM_001107939]                                                                      | <b>6,927</b> |
| Gprc5d     | Rattus norvegicus G protein-coupled receptor, family C, group 5, member D (Gprc5d), mRNA [NM_001109254]                                                   | <b>6,926</b> |
| LOC690977  | PREDICTED: Rattus norvegicus similar to RIKEN cDNA 5031410I06 (LOC690977), mRNA [XM_002727316]                                                            | <b>6,924</b> |
| 0          | Uncharacterized protein [Source:UniProtKB/TrEMBL;Acc:D3ZET0] [ENSRNOT00000035939]                                                                         | <b>6,924</b> |
| 0          | Unknown                                                                                                                                                   | <b>6,924</b> |
| Lrrn1      | Rattus norvegicus leucine rich repeat neuronal 1 (Lrrn1), mRNA [NM_001037363]                                                                             | <b>6,924</b> |
| Or7e24     | Putative gustatory receptor clone PTE01 [Source:UniProtKB/Swiss-Prot;Acc:P35894] [ENSRNOT00000067321]                                                     | <b>6,922</b> |
| Slc36a4    | Rattus norvegicus solute carrier family 36 (proton/amino acid symporter), member 4 (Slc36a4), mRNA [NM_001108127]                                         | <b>6,920</b> |
| Hexb       | Rattus norvegicus hexosaminidase B (Hexb), mRNA [NM_001011946]                                                                                            | <b>6,920</b> |
| LOC681754  | PREDICTED: Rattus norvegicus similar to cytochrome c oxidase, subunit VIb polypeptide 1 (LOC681754), mRNA [XM_001058263]                                  | <b>6,920</b> |
| Wfdc2      | Rattus norvegicus WAP four-disulfide core domain 2 (Wfdc2), mRNA [NM_173109]                                                                              | <b>6,919</b> |
| Rps6kc1    | Rattus norvegicus ribosomal protein S6 kinase, polypeptide 1 (Rps6kc1), mRNA [NM_001105984]                                                               | <b>6,919</b> |
| 0          | Uncharacterized protein [Source:UniProtKB/TrEMBL;Acc:D3ZR79] [ENSRNOT00000032299]                                                                         | <b>6,918</b> |
| 0          | Uncharacterized protein [Source:UniProtKB/TrEMBL;Acc:D3ZRP8] [ENSRNOT00000031672]                                                                         | <b>6,918</b> |
| Olr120     | Rattus norvegicus olfactory receptor 120 (Olr120), mRNA [NM_001000154]                                                                                    | <b>6,917</b> |
| Gata1      | Rattus norvegicus GATA binding protein 1 (Gata1), mRNA [NM_012764]                                                                                        | <b>6,916</b> |
| Clk2       | Rattus norvegicus CDC-like kinase 2 (Clk2), mRNA [NM_001014254]                                                                                           | <b>6,916</b> |
| Wdr47      | Rattus norvegicus WD repeat domain 47 (Wdr47), mRNA [NM_001100702]                                                                                        | <b>6,916</b> |
| Snca       | synuclein SYN2 {alternatively spliced} [rats, mRNA, 695 nt]. [S73008]                                                                                     | <b>6,914</b> |
| Cp         | Rattus norvegicus GPI-anchored ceruloplasmin mRNA, complete cds. [AF202115]                                                                               | <b>6,912</b> |
| Polr2e     | Rattus norvegicus polymerase (RNA) II (DNA directed) polypeptide E (Polr2e), mRNA [NM_001109614]                                                          | <b>6,912</b> |
| 0          | Unknown                                                                                                                                                   | <b>6,912</b> |
| Zbtb2      | Rattus norvegicus zinc finger and BTB domain containing 2 (Zbtb2), mRNA [NM_001107460]                                                                    | <b>6,911</b> |

|            |                                                                                                                                                       |              |
|------------|-------------------------------------------------------------------------------------------------------------------------------------------------------|--------------|
| 0          | Uncharacterized protein [Source:UniProtKB/TrEMBL;Acc:D3ZPH4] [ENSRNOT00000061920]                                                                     | <b>6,911</b> |
| Cpsf4l     | PREDICTED: Rattus norvegicus cleavage and polyadenylation specific factor 4-like (Cpsf4l), mRNA [XM_001081632]                                        | <b>6,910</b> |
| Pdgfd      | Rattus norvegicus platelet-derived growth factor, D polypeptide (Pdgfd), mRNA [NM_023962]                                                             | <b>6,910</b> |
| 0          | Unknown                                                                                                                                               | <b>6,909</b> |
| LOC686388  | PREDICTED: Rattus norvegicus similar to Prostatic steroid-binding protein C1 chain precursor (Prostatein peptide C1) (LOC686388), mRNA [XM_001073908] | <b>6,906</b> |
| LOC500413  | Rattus norvegicus hypothetical protein LOC500413 (LOC500413), mRNA [NM_001171802]                                                                     | <b>6,906</b> |
| 0          | Unknown                                                                                                                                               | <b>6,906</b> |
| 0          | Rattus norvegicus similar to Alpha enolase (2-phospho-D-glycerate hydro-lyase) (Non-neural enolase) (NNE) (Enolase 1) (LOC310585), mRNA [XM_227366]   | <b>6,906</b> |
| RGD1560248 | PREDICTED: Rattus norvegicus similar to formin-like 2 isoform B, transcript variant 2 (RGD1560248), mRNA [XM_002726151]                               | <b>6,905</b> |
| Rnase4     | Rattus norvegicus ribonuclease, RNase A family 4 (Rnase4), mRNA [NM_020082]                                                                           | <b>6,905</b> |
| Jam3       | Rattus norvegicus junctional adhesion molecule 3 (Jam3), mRNA [NM_001004269]                                                                          | <b>6,905</b> |
| Gak        | Rattus norvegicus cyclin G associated kinase (Gak), mRNA [NM_031030]                                                                                  | <b>6,903</b> |
| 0          | Unknown                                                                                                                                               | <b>6,903</b> |
| 0          | Unknown                                                                                                                                               | <b>6,901</b> |
| Olr209     | Rattus norvegicus olfactory receptor 209 (Olr209), mRNA [NM_001000736]                                                                                | <b>6,900</b> |
| Rgnef      | Rattus norvegicus Rho-guanine nucleotide exchange factor (Rgnef), mRNA [NM_001108542]                                                                 | <b>6,900</b> |
| Numa1      | PREDICTED: Rattus norvegicus nuclear mitotic apparatus protein 1 (Numa1), mRNA [XM_218972]                                                            | <b>6,900</b> |
| Psmc7      | Rattus norvegicus proteasome (prosome, macropain) 26S subunit, non-ATPase, 7 (Psmc7), mRNA [NM_001107426]                                             | <b>6,899</b> |
| Trex1      | Rattus norvegicus three prime repair exonuclease 1 (Trex1), mRNA [NM_001024989]                                                                       | <b>6,898</b> |
| 0          | Unknown                                                                                                                                               | <b>6,898</b> |
| Irf6       | Rattus norvegicus interferon regulatory factor 6 (Irf6), mRNA [NM_001108859]                                                                          | <b>6,898</b> |
| Gdpd1      | Rattus norvegicus glycerophosphodiester phosphodiesterase domain containing 1 (Gdpd1), mRNA [NM_001044238]                                            | <b>6,897</b> |
| 0          | Unknown                                                                                                                                               | <b>6,895</b> |
| Alg11      | Rattus norvegicus asparagine-linked glycosylation 11, alpha-1,2-mannosyltransferase homolog (yeast) (Alg11), mRNA [NM_001108401]                      | <b>6,895</b> |
| Dnlz       | Rattus norvegicus DNL-type zinc finger (Dnlz), mRNA [NM_001130990]                                                                                    | <b>6,895</b> |
| 0          | Uncharacterized protein [Source:UniProtKB/TrEMBL;Acc:D3ZWP2] [ENSRNOT00000025138]                                                                     | <b>6,893</b> |
| LOC682377  | PREDICTED: Rattus norvegicus similar to olfactory receptor 697 (LOC682377), partial mRNA [XM_001061252]                                               | <b>6,893</b> |
| Mpv17l     | Rattus norvegicus MPV17 mitochondrial membrane protein-like (Mpv17l), nuclear gene encoding mitochondrial protein, mRNA [NM_001098240]                | <b>6,891</b> |
| Whsc1l1    | Rattus norvegicus Wolf-Hirschhorn syndrome candidate 1-like 1 (human) (Whsc1l1), mRNA [NM_001106090]                                                  | <b>6,889</b> |
| Tnks       | Rattus norvegicus tankyrase, TRF1-interacting ankyrin-related ADP-ribose polymerase (Tnks), mRNA [NM_001106084]                                       | <b>6,886</b> |
| LOC680039  | Rattus norvegicus hypothetical protein LOC680039 (LOC680039), mRNA [NM_001109388]                                                                     | <b>6,886</b> |
| LOC686031  | Rattus norvegicus hypothetical protein LOC686031 (LOC686031), mRNA [NM_001109490]                                                                     | <b>6,885</b> |

|           |                                                                                                                                                              |              |
|-----------|--------------------------------------------------------------------------------------------------------------------------------------------------------------|--------------|
| Cbln3     | Rattus norvegicus cerebellin 3 precursor (Cbln3), mRNA [NM_001109330]                                                                                        | <b>6,884</b> |
| Actg1     | Rattus norvegicus actin, gamma 1 (Actg1), mRNA [NM_001127449]                                                                                                | <b>6,884</b> |
| Mgat4a    | Rattus norvegicus mannosyl (alpha-1,3-)-glycoprotein beta-1,4-N-acetylglucosaminyltransferase, isozyme A (Mgat4a), transcript variant 1, mRNA [NM_001160155] | <b>6,882</b> |
| Mrgpre    | Rattus norvegicus MAS-related GPR, member E (Mrgpre), mRNA [NM_001002288]                                                                                    | <b>6,881</b> |
| Sall2     | Rattus norvegicus sal-like 2 (Drosophila) (Sall2), mRNA [NM_001107262]                                                                                       | <b>6,880</b> |
| LOC680227 | Rattus norvegicus LRRGT00193 (LOC680227), mRNA [NM_001047974]                                                                                                | <b>6,880</b> |
| 0         | Unknown                                                                                                                                                      | <b>6,879</b> |
| Cpne9     | Rattus norvegicus copine family member IX (Cpne9), mRNA [NM_001024982]                                                                                       | <b>6,878</b> |
| Alpk1     | Uncharacterized protein [Source:UniProtKB/TrEMBL;Acc:D3ZTA7] [ENSRNOT00000030798]                                                                            | <b>6,876</b> |
| 0         | Unknown                                                                                                                                                      | <b>6,874</b> |
| LOC686041 | Rattus norvegicus cDNA clone IMAGE:6889638, partial cds. [BC059164]                                                                                          | <b>6,873</b> |
| Tpst2     | Rattus norvegicus tyrosylprotein sulfotransferase 2 (Tpst2), mRNA [NM_001008508]                                                                             | <b>6,873</b> |
| Daxx      | Rattus norvegicus death-domain associated protein (Daxx), mRNA [NM_080891]                                                                                   | <b>6,872</b> |
| LOC686980 | PREDICTED: Rattus norvegicus similar to arsenate resistance protein 2 (LOC686980), mRNA [XM_001076594]                                                       | <b>6,872</b> |
| 0         | Rattus norvegicus similar to 60S ribosomal protein L13a (Transplantation antigen P198) (Tum-P198 antigen) (LOC365089), mRNA [XM_344809]                      | <b>6,871</b> |
| 0         | Unknown                                                                                                                                                      | <b>6,869</b> |
| Smg5      | Rattus norvegicus Smg-5 homolog, nonsense mediated mRNA decay factor (C. elegans), mRNA (cDNA clone IMAGE:9034114), partial cds. [BC169031]                  | <b>6,868</b> |
| 0         | Uncharacterized protein [Source:UniProtKB/TrEMBL;Acc:D3Z9L4] [ENSRNOT00000015730]                                                                            | <b>6,867</b> |
| Vapb      | Vesicle-associated membrane protein-associated protein B [Source:UniProtKB/Swiss-Prot;Acc:Q9Z269] [ENSRNOT00000007554]                                       | <b>6,867</b> |
| Uba6      | Rattus norvegicus ubiquitin-like modifier activating enzyme 6 (Uba6), mRNA [NM_001107213]                                                                    | <b>6,866</b> |
| Trip12    | Rattus norvegicus thyroid hormone receptor interactor 12 (Trip12), mRNA [NM_001031659]                                                                       | <b>6,864</b> |
| LOC501080 | PREDICTED: Rattus norvegicus similar to Discs large homolog 5 (Placenta and prostate DLG) (Discs large protein P-dlg) (LOC501080), mRNA [XM_576492]          | <b>6,864</b> |
| Ccnk      | Rattus norvegicus cyclin K (Ccnk), mRNA [NM_001109672]                                                                                                       | <b>6,864</b> |
| 0         | Unknown                                                                                                                                                      | <b>6,862</b> |
| Birc7     | PREDICTED: Rattus norvegicus baculoviral IAP repeat-containing 7 (Birc7), mRNA [XM_001058257]                                                                | <b>6,861</b> |
| Fcgr2a    | Low affinity immunoglobulin gamma Fc region receptor III [Source:UniProtKB/Swiss-Prot;Acc:P27645] [ENSRNOT00000045427]                                       | <b>6,861</b> |
| Mtrr      | Rattus norvegicus 5-methyltetrahydrofolate-homocysteine methyltransferase reductase (Mtrr), mRNA [NM_001039003]                                              | <b>6,859</b> |
| Krtcap2   | Rattus norvegicus keratinocyte associated protein 2 (Krtcap2), mRNA [NM_001106444]                                                                           | <b>6,859</b> |
| Spsb3     | Rattus norvegicus sPLA/ryanodine receptor domain and SOCS box containing 3 (Spsb3), mRNA [NM_001106988]                                                      | <b>6,859</b> |
| Dcbld2    | Rattus norvegicus discoidin, CUB and LCCL domain containing 2 (Dcbld2), mRNA [NM_130419]                                                                     | <b>6,857</b> |
| Akr1cl2   | Rattus norvegicus aldo-keto reductase family 1, member C-like 2 (Akr1cl2), mRNA [NM_001008342]                                                               | <b>6,856</b> |

|            |                                                                                                                                                                                   |       |
|------------|-----------------------------------------------------------------------------------------------------------------------------------------------------------------------------------|-------|
| Pnkp       | Rattus norvegicus polynucleotide kinase 3'-phosphatase (Pnkp), mRNA [NM_001004259]                                                                                                | 6,856 |
| Dbr1       | Rattus norvegicus debranching enzyme homolog 1 ( <i>S. cerevisiae</i> ) (Dbr1), mRNA [NM_001109437]                                                                               | 6,856 |
| Ccdc23     | Rattus norvegicus coiled-coil domain containing 23 (Ccdc23), transcript variant 1, mRNA [NM_001038994]                                                                            | 6,855 |
| 0          | Uncharacterized protein [Source:UniProtKB/TrEMBL;Acc:D3ZFM9] [ENSRNOT00000064974]                                                                                                 | 6,853 |
| Aldh2      | Rattus norvegicus aldehyde dehydrogenase 2 family (mitochondrial) (Aldh2), nuclear gene encoding mitochondrial protein, mRNA [NM_032416]                                          | 6,853 |
| Rbm12      | Rattus norvegicus RNA binding motif protein 12 (Rbm12), mRNA [NM_001037657]                                                                                                       | 6,852 |
| Dll3       | Rattus norvegicus delta-like 3 ( <i>Drosophila</i> ) (Dll3), mRNA [NM_053666]                                                                                                     | 6,852 |
| 0          | PREDICTED: Rattus norvegicus similar to double homeobox 4c (LOC680963), mRNA [XM_002725876]                                                                                       | 6,852 |
| Slc7a11    | Rattus norvegicus solute carrier family 7 (cationic amino acid transporter, y+ system), member 11 (Slc7a11), mRNA [NM_001107673]                                                  | 6,851 |
| 0          | Unknown                                                                                                                                                                           | 6,851 |
| 0          | PRD11_HUMAN (Q9NQV5) PR domain-containing protein 11, partial (36%) [TC604616]                                                                                                    | 6,850 |
| Fundc2     | Rattus norvegicus FUN14 domain containing 2 (Fundc2), mRNA [NM_001135757]                                                                                                         | 6,850 |
| Abcb9      | Rattus norvegicus ATP-binding cassette, subfamily B (MDR/TAP), member 9 (Abcb9), mRNA [NM_022238]                                                                                 | 6,850 |
| Rgc32      | Rattus norvegicus response gene to complement 32 (Rgc32), mRNA [NM_054008]                                                                                                        | 6,849 |
| Anp32a     | Rattus norvegicus acidic (leucine-rich) nuclear phosphoprotein 32 family, member A (Anp32a), mRNA [NM_012903]                                                                     | 6,849 |
| Npdc1      | Rattus norvegicus neural proliferation, differentiation and control, 1 (Npdc1), mRNA [NM_001004231]                                                                               | 6,849 |
| 0          | Unknown                                                                                                                                                                           | 6,848 |
| Olr1186    | Rattus norvegicus olfactory receptor 1186 (Olr1186), mRNA [NM_001000862]                                                                                                          | 6,848 |
| Olr1226    | Rattus norvegicus olfactory receptor 1226 (Olr1226), mRNA [NM_001000442]                                                                                                          | 6,848 |
| Tbc1d2b    | Rattus norvegicus TBC1 domain family, member 2B (Tbc1d2b), mRNA [NM_001108175]                                                                                                    | 6,847 |
| 0          | Unknown                                                                                                                                                                           | 6,846 |
| 0          | Unknown                                                                                                                                                                           | 6,846 |
| 0          | Unknown                                                                                                                                                                           | 6,846 |
| N4bp3      | Rattus norvegicus Nedd4 binding protein 3 (N4bp3), mRNA [NM_001033893]                                                                                                            | 6,845 |
| Syt4       | Rattus norvegicus synaptotagmin IV (Syt4), mRNA [NM_031693]                                                                                                                       | 6,845 |
| 0          | Unknown                                                                                                                                                                           | 6,845 |
| Rptor      | Rattus norvegicus regulatory associated protein of MTOR, complex 1 (Rptor), mRNA [NM_001134499]                                                                                   | 6,845 |
| Fbxw12     | Uncharacterized protein [Source:UniProtKB/TrEMBL;Acc:D4A956] [ENSRNOT00000028113]                                                                                                 | 6,841 |
| Adam9      | Rattus norvegicus ADAM metallopeptidase domain 9 (meltrin gamma) (Adam9), mRNA [NM_001014772]                                                                                     | 6,840 |
| Stard10    | Rattus norvegicus StAR-related lipid transfer (START) domain containing 10 (Stard10), mRNA [NM_001013069]                                                                         | 6,840 |
| Slc25a19   | Rattus norvegicus solute carrier family 25 (mitochondrial thiamine pyrophosphate carrier), member 19 (Slc25a19), nuclear gene encoding mitochondrial protein, mRNA [NM_001007674] | 6,840 |
| RGD1308541 | Uncharacterized protein [Source:UniProtKB/TrEMBL;Acc:D3ZFP6] [ENSRNOT00000031783]                                                                                                 | 6,839 |
| Rit1       | Rattus norvegicus Ras-like without CAAX 1 (Rit1), mRNA [NM_001109185]                                                                                                             | 6,838 |

|           |                                                                                                                                                                             |       |
|-----------|-----------------------------------------------------------------------------------------------------------------------------------------------------------------------------|-------|
| Exoc5     | Rattus norvegicus exocyst complex component 5 (Exoc5), mRNA [NM_022204]                                                                                                     | 6,837 |
| Abca5     | Rattus norvegicus ATP-binding cassette, subfamily A (ABC1), member 5 (Abca5), mRNA [NM_173307]                                                                              | 6,836 |
| Rpl6      | Rattus norvegicus ribosomal protein L6 (Rpl6), mRNA [NM_053971]                                                                                                             | 6,836 |
| Il12rb2   | Rattus norvegicus interleukin 12 receptor, beta 2 (Il12rb2), mRNA [NM_001191750]                                                                                            | 6,835 |
| Olr143    | Rattus norvegicus olfactory receptor 143 (Olr143), mRNA [NM_001000163]                                                                                                      | 6,834 |
| Nup153    | Rattus norvegicus nucleoporin 153 (Nup153), mRNA [NM_001100470]                                                                                                             | 6,834 |
| Sppl2b    | Rattus norvegicus signal peptide peptidase-like 2B (Sppl2b), mRNA [NM_001014200]                                                                                            | 6,833 |
| Arpc1b    | Rattus norvegicus actin related protein 2/3 complex, subunit 1B (Arpc1b), mRNA [NM_019289]                                                                                  | 6,832 |
| Mrpl50    | Rattus norvegicus mitochondrial ribosomal protein L50 (Mrpl50), nuclear gene encoding mitochondrial protein, mRNA [NM_001108665]                                            | 6,831 |
| 0         | DP13A_MOUSE (Q8K3H0) DCC-interacting protein 13 alpha (Dip13 alpha) (Adapter protein containing PH domain, PTB domain and leucine zipper motif 1), partial (54%) [TC594026] | 6,831 |
| Bnpl      | Rattus norvegicus BCL2/adenovirus E1B 19kD interacting protein like (Bnpl), mRNA [NM_001128187]                                                                             | 6,830 |
| 0         | Unknown                                                                                                                                                                     | 6,830 |
| 0         | Protein FAM162A [Source:UniProtKB/Swiss-Prot;Acc:Q4QQV3] [ENSRNOT00000003069]                                                                                               | 6,830 |
| 0         | PREDICTED: Rattus norvegicus similar to Tle6 protein (RGD1561530), miscRNA [XR_009018]                                                                                      | 6,830 |
| Nosip     | Rattus norvegicus nitric oxide synthase interacting protein (Nosip), mRNA [NM_001106260]                                                                                    | 6,829 |
| LOC500265 | PREDICTED: Rattus norvegicus nucleoporin 50-like (LOC500265), miscRNA [XR_007267]                                                                                           | 6,827 |
| Neurl     | Rattus norvegicus neuralized homolog (Drosophila) (Neurl), mRNA [NM_001107605]                                                                                              | 6,827 |
| 0         | Unknown                                                                                                                                                                     | 6,826 |
| Amot      | Uncharacterized protein [Source:UniProtKB/TrEMBL;Acc:D3ZZ27] [ENSRNOT00000049482]                                                                                           | 6,826 |
| LOC500959 | Rattus norvegicus triosephosphate isomerase (LOC500959), mRNA [NM_001033072]                                                                                                | 6,825 |
| 0         | Unknown                                                                                                                                                                     | 6,824 |
| LOC690350 | PREDICTED: Rattus norvegicus similar to LSM7 homolog, U6 small nuclear RNA associated (LOC690350), mRNA [XM_001074288]                                                      | 6,822 |
| Polr3g    | Rattus norvegicus polymerase (RNA) III (DNA directed) polypeptide G (Polr3g), mRNA [NM_001109468]                                                                           | 6,821 |
| Vwa3a     | Rattus norvegicus von Willebrand factor A domain containing 3A (Vwa3a), transcript variant 1, mRNA [NM_001198653]                                                           | 6,821 |
| Cldn4     | Rattus norvegicus claudin 4 (Cldn4), mRNA [NM_001012022]                                                                                                                    | 6,821 |
| 0         | Unknown                                                                                                                                                                     | 6,820 |
| Fkbp15    | Uncharacterized protein [Source:UniProtKB/TrEMBL;Acc:D3ZR68] [ENSRNOT00000002083]                                                                                           | 6,820 |
| Rsrc1     | Rattus norvegicus arginine/serine-rich coiled-coil 1 (Rsrc1), mRNA [NM_001014172]                                                                                           | 6,818 |
| Gdpd2     | Rattus norvegicus glycerophosphodiester phosphodiesterase domain containing 2 (Gdpd2), mRNA [NM_001106944]                                                                  | 6,818 |
| Lgmn      | Rattus norvegicus legumain (Lgmn), mRNA [NM_022226]                                                                                                                         | 6,818 |
| 0         | Unknown                                                                                                                                                                     | 6,818 |
| 0         | Uncharacterized protein [Source:UniProtKB/TrEMBL;Acc:D3ZQ32] [ENSRNOT00000039210]                                                                                           | 6,817 |



|            |                                                                                                                                                                                                                 |       |
|------------|-----------------------------------------------------------------------------------------------------------------------------------------------------------------------------------------------------------------|-------|
| RGD1308930 | PREDICTED: Rattus norvegicus similar to Protein phosphatase 1, regulatory subunit 3D (Protein phosphatase 1, regulatory subunit 6) (Protein phosphatase 1 binding subunit R6) (RGD1308930), mRNA [XM_002725247] | 6,817 |
| 0          | Unknown                                                                                                                                                                                                         | 6,817 |
| Ruvbl2     | Rattus norvegicus RuvB-like 2 (E. coli) (Ruvbl2), mRNA [NM_001025405]                                                                                                                                           | 6,816 |
| Spata3     | Rattus norvegicus spermatogenesis associated 3 (Spata3), mRNA [NM_001108805]                                                                                                                                    | 6,816 |
| 0          | Uncharacterized protein [Source:UniProtKB/TrEMBL;Acc:D3ZBD2] [ENSRNOT00000040453]                                                                                                                               | 6,813 |
| Luc7l2     | Rattus norvegicus LUC7-like 2 (S. cerevisiae) (Luc7l2), mRNA [NM_001107853]                                                                                                                                     | 6,811 |
| Obfc1      | Rattus norvegicus oligonucleotide/oligosaccharide-binding fold containing 1 (Obfc1), mRNA [NM_001011943]                                                                                                        | 6,811 |
| 0          | Unknown                                                                                                                                                                                                         | 6,810 |
| Prr16      | Rattus norvegicus proline rich 16 (Prr16), mRNA [NM_001108432]                                                                                                                                                  | 6,810 |
| Megf10     | Rattus norvegicus multiple EGF-like domains 10 (Megf10), mRNA [NM_001100657]                                                                                                                                    | 6,808 |
| 0          | Unknown                                                                                                                                                                                                         | 6,807 |
| Ep400      | Rattus norvegicus E1A binding protein p400 (Ep400), mRNA [NM_001107149]                                                                                                                                         | 6,807 |
| Acsm3      | Rattus norvegicus acyl-CoA synthetase medium-chain family member 3 (Acsm3), mRNA [NM_033231]                                                                                                                    | 6,806 |
| 0          | Unknown                                                                                                                                                                                                         | 6,806 |
| Dscr3      | Rattus norvegicus Down syndrome critical region gene 3 (Dscr3), mRNA [NM_001108316]                                                                                                                             | 6,806 |
| RGD1560398 | PREDICTED: Rattus norvegicus RGD1560398 (RGD1560398), mRNA [XM_001080358]                                                                                                                                       | 6,805 |
| Ccl5       | Rattus norvegicus chemokine (C-C motif) ligand 5 (Ccl5), mRNA [NM_031116]                                                                                                                                       | 6,804 |
| Olr390     | Rattus norvegicus olfactory receptor 390 (Olr390), mRNA [NM_001000558]                                                                                                                                          | 6,803 |
| 0          | Unknown                                                                                                                                                                                                         | 6,802 |
| Rilpl1     | Rattus norvegicus Rab interacting lysosomal protein-like 1 (Rilpl1), mRNA [NM_001191665]                                                                                                                        | 6,802 |
| Mybl1      | Rattus norvegicus myeloblastosis oncogene-like 1 (Mybl1), mRNA [NM_001106632]                                                                                                                                   | 6,801 |
| 0          | PREDICTED: Rattus norvegicus similar to polymerase (RNA) II (DNA directed) polypeptide H (RGD1565904), mRNA [XM_001071711]                                                                                      | 6,800 |
| Mrgprg     | Rattus norvegicus MAS-related GPR, member G (Mrgprg), mRNA [NM_203470]                                                                                                                                          | 6,800 |
| Prodh      | Rattus norvegicus proline dehydrogenase (Prodh), nuclear gene encoding mitochondrial protein, mRNA [NM_001135778]                                                                                               | 6,800 |
| Lgi1       | Rattus norvegicus leucine-rich, glioma inactivated 1 (Lgi1), mRNA [NM_145769]                                                                                                                                   | 6,799 |
| Igsf3      | Rattus norvegicus immunoglobulin superfamily, member 3 (Igsf3), mRNA [NM_001106455]                                                                                                                             | 6,799 |
| Usp42      | Rattus norvegicus ubiquitin specific peptidase 42 (Usp42), mRNA [NM_001105909]                                                                                                                                  | 6,798 |
| 0          | Unknown                                                                                                                                                                                                         | 6,798 |
| Trpc3      | Rattus norvegicus transient receptor potential cation channel, subfamily C, member 3 (Trpc3), mRNA [NM_021771]                                                                                                  | 6,798 |
| 0          | Rattus norvegicus TL0ADA18YA08 mRNA sequence. [FQ222908]                                                                                                                                                        | 6,797 |
| Dock6      | Rattus norvegicus dedicator of cytokinesis 6 (Dock6), mRNA [NM_001108997]                                                                                                                                       | 6,796 |
| 0          | Unknown                                                                                                                                                                                                         | 6,796 |
| 0          | Unknown                                                                                                                                                                                                         | 6,795 |

|            |                                                                                                                  |       |
|------------|------------------------------------------------------------------------------------------------------------------|-------|
| 0          | Unknown                                                                                                          | 6,794 |
| 0          | Unknown                                                                                                          | 6,793 |
| 0          | Uncharacterized protein [Source:UniProtKB/TrEMBL;Acc:D3ZRC6] [ENSRNOT00000050943]                                | 6,792 |
| Lsm7       | Rattus norvegicus LSM7 homolog, U6 small nuclear RNA associated (S. cerevisiae) (Lsm7), mRNA [NM_001108732]      | 6,792 |
| Tchp       | Rattus norvegicus trichoplein, keratin filament binding (Tchp), mRNA [NM_001191666]                              | 6,792 |
| 0          | immunoglobulin superfamily member 3 [Source:RefSeq peptide;Acc:NP_001099925] [ENSRNOT00000035518]                | 6,791 |
| Acbd5      | Rattus norvegicus acyl-Coenzyme A binding domain containing 5 (Acbd5), mRNA [NM_001077635]                       | 6,791 |
| Col9a2     | Rattus norvegicus collagen, type IX, alpha 2 (Col9a2), mRNA [NM_001108675]                                       | 6,790 |
| Cyc1       | Rattus norvegicus cytochrome c-1 (Cyc1), nuclear gene encoding mitochondrial protein, mRNA [NM_001130491]        | 6,790 |
| RGD1563047 | Rattus norvegicus similar to von Ebner minor salivary gland protein (RGD1563047), mRNA [NM_001077680]            | 6,789 |
| Ppp1r1a    | Rattus norvegicus protein phosphatase 1, regulatory (inhibitor) subunit 1A (Ppp1r1a), mRNA [NM_022676]           | 6,788 |
| Olr1252    | Rattus norvegicus olfactory receptor 1252 (Olr1252), mRNA [NM_001000454]                                         | 6,788 |
| Nedd9      | Rattus norvegicus neural precursor cell expressed, developmentally down-regulated 9 (Nedd9), mRNA [NM_001011922] | 6,788 |
| Eea1       | Rattus norvegicus early endosome antigen 1 (Eea1), mRNA [NM_001108086]                                           | 6,787 |
| 0          | Unknown                                                                                                          | 6,786 |
| RGD1311899 | Rattus norvegicus similar to RIKEN cDNA 2210016L21 gene (RGD1311899), mRNA [NM_001009630]                        | 6,786 |
| 0          | Unknown                                                                                                          | 6,786 |
| Phgdh      | Rattus norvegicus phosphoglycerate dehydrogenase (Phgdh), mRNA [NM_031620]                                       | 6,785 |
| Klhl20     | Rattus norvegicus kelch-like 20 (Drosophila) (Klhl20), mRNA [NM_001107192]                                       | 6,784 |
| Fastkd3    | Rattus norvegicus FAST kinase domains 3 (Fastkd3), mRNA [NM_001082574]                                           | 6,782 |
| 0          | Unknown                                                                                                          | 6,781 |
| Ltk        | Rattus norvegicus leukocyte receptor tyrosine kinase (Ltk), mRNA [NM_001107763]                                  | 6,780 |
| Znf641     | Rattus norvegicus zinc finger protein 641 (Znf641), mRNA [NM_001106792]                                          | 6,779 |
| 0          | Unknown                                                                                                          | 6,778 |
| LOC690344  | Rattus norvegicus similar to Protein UNQ655/PRO1286 homolog precursor (LOC690344), mRNA [NM_001168661]           | 6,777 |
| LOC317456  | Rattus norvegicus hypothetical LOC317456 (LOC317456), mRNA [NM_001047894]                                        | 6,777 |
| 0          | Rattus norvegicus similar to glyceraldehyde-3-phosphate dehydrogenase (LOC299727), mRNA [XM_235039]              | 6,775 |
| Slc35b1    | Rattus norvegicus solute carrier family 35, member B1 (Slc35b1), mRNA [NM_199081]                                | 6,775 |
| 0          | Unknown                                                                                                          | 6,775 |
| Zdhhc4     | Rattus norvegicus zinc finger, DHHC-type containing 4 (Zdhhc4), mRNA [NM_001013123]                              | 6,775 |
| Tpte       | Rattus norvegicus transmembrane phosphatase with tensin homology (Tpte), mRNA [NM_001108877]                     | 6,774 |
| RGD1359378 | Rattus norvegicus mesenchymal stem cell protein DSCD75 (RGD1359378), mRNA [NM_001007658]                         | 6,773 |
| 0          | Unknown                                                                                                          | 6,773 |
| Pik3ca     | Rattus norvegicus phosphoinositide-3-kinase, catalytic, alpha polypeptide (Pik3ca), mRNA [NM_133399]             | 6,772 |

|            |                                                                                                                                  |       |
|------------|----------------------------------------------------------------------------------------------------------------------------------|-------|
| Vom1r6     | Rattus norvegicus vomeronasal 1 receptor 6 (Vom1r6), mRNA [NM_001009512]                                                         | 6,771 |
| Aldh1a1    | Rattus norvegicus aldehyde dehydrogenase 1 family, member A1 (Aldh1a1), mRNA [NM_022407]                                         | 6,771 |
| Zfp329     | Rattus norvegicus zinc finger protein 329 (Zfp329), mRNA [NM_001107477]                                                          | 6,770 |
| Tmem57     | Rattus norvegicus transmembrane protein 57 (Tmem57), mRNA [NM_001025699]                                                         | 6,770 |
| St7l       | Rattus norvegicus suppression of tumorigenicity 7-like (St7l), mRNA [NM_001007639]                                               | 6,768 |
| Sec3l1     | Rattus norvegicus SEC3-like 1 (S. cerevisiae) (Sec3l1), mRNA [NM_001024770]                                                      | 6,768 |
| Trabd      | Rattus norvegicus TraB domain containing (Trabd), mRNA [NM_001106788]                                                            | 6,767 |
| Scx        | Rattus norvegicus scleraxis (Scx), mRNA [NM_001130508]                                                                           | 6,767 |
| Syt4       | Rattus norvegicus synaptotagmin-like 4 (Syt4), mRNA [NM_080410]                                                                  | 6,765 |
| Fam76b     | Rattus norvegicus family with sequence similarity 76, member B (Fam76b), mRNA [NM_001108994]                                     | 6,765 |
| Grin1a     | Rattus norvegicus glutamate receptor, ionotropic, N-methyl D-aspartate-like 1A (Grin1a), mRNA [NM_183402]                        | 6,765 |
| Rdh11      | Rattus norvegicus retinol dehydrogenase 11 (all-trans/9-cis/11-cis) (Rdh11), mRNA [NM_001012193]                                 | 6,764 |
| Lgi2       | Rattus norvegicus leucine-rich repeat LGI family, member 2 (Lgi2), mRNA [NM_001107219]                                           | 6,763 |
| Klhl11     | Rattus norvegicus kelch-like 11 (Drosophila) (Klhl11), mRNA [NM_001105838]                                                       | 6,762 |
| 0          | Unknown                                                                                                                          | 6,760 |
| Krt83      | Rattus norvegicus keratin 83 (Krt83), mRNA [NM_001101675]                                                                        | 6,759 |
| Pex26      | Rattus norvegicus peroxisomal biogenesis factor 26 (Pex26), mRNA [NM_001106618]                                                  | 6,759 |
| 0          | Unknown                                                                                                                          | 6,759 |
| Mrpl53     | Rattus norvegicus mitochondrial ribosomal protein L53 (Mrpl53), nuclear gene encoding mitochondrial protein, mRNA [NM_001108635] | 6,757 |
| Pqbp1      | Rattus norvegicus polyglutamine binding protein 1 (Pqbp1), mRNA [NM_001013957]                                                   | 6,753 |
| RGD1560065 | Rattus norvegicus similar to RIKEN cDNA 2410004B18 (RGD1560065), mRNA [NM_001134616]                                             | 6,753 |
| Wfdc2      | Rattus norvegicus WAP four-disulfide core domain 2 (Wfdc2), mRNA [NM_173109]                                                     | 6,753 |
| Cyb5r4     | Rattus norvegicus cytochrome b5 reductase 4 (Cyb5r4), mRNA [NM_133427]                                                           | 6,753 |
| 0          | Uncharacterized protein [Source:UniProtKB/TrEMBL;Acc:D4ABX1] [ENSRNOT00000032406]                                                | 6,751 |
| Klhl8      | Rattus norvegicus kelch-like 8 (Drosophila) (Klhl8), mRNA [NM_001105995]                                                         | 6,749 |
| 0          | Unknown                                                                                                                          | 6,749 |
| Acsf3      | Similar to C50H11.1, isoform CRA_aUncharacterized protein [Source:UniProtKB/TrEMBL;Acc:D3ZUX7] [ENSRNOT00000020313]              | 6,748 |
| Igtp       | Rattus norvegicus interferon gamma induced GTPase (Igtp), mRNA [NM_001008765]                                                    | 6,748 |
| LOC317416  | PREDICTED: Rattus norvegicus similar to inter alpha-trypsin inhibitor, heavy chain 4 (LOC317416), miscRNA [XR_006139]            | 6,748 |
| Fgd4       | Rattus norvegicus FYVE, RhoGEF and PH domain containing 4 (Fgd4), mRNA [NM_139263]                                               | 6,748 |
| Actg2      | Rattus norvegicus actin, gamma 2, smooth muscle, enteric (Actg2), mRNA [NM_012893]                                               | 6,747 |
| 0          | Unknown                                                                                                                          | 6,747 |
| Pxdn       | PREDICTED: Rattus norvegicus peroxidasin homolog (Drosophila) (Pxdn), partial mRNA [XM_001053103]                                | 6,746 |
| Vom2r56    | Rattus norvegicus vomeronasal 2 receptor, 56 (Vom2r56), mRNA [NM_001099484]                                                      | 6,745 |

|            |                                                                                                                                        |       |
|------------|----------------------------------------------------------------------------------------------------------------------------------------|-------|
| Rragd      | Rattus norvegicus Ras-related GTP binding D (Rragd), mRNA [NM_001106641]                                                               | 6,744 |
| 0          | Unknown                                                                                                                                | 6,744 |
| Ppfibp2    | Rattus norvegicus PTPRF interacting protein, binding protein 2 (liprin beta 2) (Ppfibp2), mRNA [NM_001100582]                          | 6,744 |
| Orc6l      | Rattus norvegicus origin recognition complex, subunit 6 like (yeast) (Orc6l), mRNA [NM_001033690]                                      | 6,743 |
| Txndc15    | Rattus norvegicus thioredoxin domain containing 15 (Txndc15), mRNA [NM_001024998]                                                      | 6,743 |
| Sipa1l2    | Rattus norvegicus signal-induced proliferation-associated 1 like 2 (Sipa1l2), mRNA [NM_001009704]                                      | 6,743 |
| Il2rb      | Rattus norvegicus interleukin 2 receptor, beta (Il2rb), mRNA [NM_013195]                                                               | 6,743 |
| Map2k1ip1  | Rattus norvegicus mitogen-activated protein kinase kinase 1 interacting protein 1 (Map2k1ip1), mRNA [NM_001008375]                     | 6,743 |
| RGD1564664 | Rattus norvegicus similar to LOC387763 protein (RGD1564664), mRNA [NM_001110055]                                                       | 6,742 |
| Purb       | Rattus norvegicus purine rich element binding protein B (Purb), mRNA [NM_001017503]                                                    | 6,741 |
| Pmpca      | Rattus norvegicus peptidase (mitochondrial processing) alpha (Pmpca), nuclear gene encoding mitochondrial protein, mRNA [NM_001003673] | 6,741 |
| 0          | Unknown                                                                                                                                | 6,739 |
| Pkd1       | PREDICTED: Rattus norvegicus polycystic kidney disease 1 homolog (human), transcript variant 2 (Pkd1), mRNA [XM_002727754]             | 6,739 |
| Insig2     | Insulin-induced gene 2 protein [Source:UniProtKB/Swiss-Prot;Acc:Q80UA9] [ENSRNOT00000003391]                                           | 6,738 |
| Gldc       | Rattus norvegicus glycine dehydrogenase (decarboxylating) (Gldc), nuclear gene encoding mitochondrial protein, mRNA [NM_001107583]     | 6,737 |
| RGD1305592 | Rattus norvegicus similar to RIKEN cDNA 2900092E17 (RGD1305592), mRNA [NM_001013901]                                                   | 6,733 |
| Gtf2f1     | Rattus norvegicus general transcription factor IIF, polypeptide 1 (Gtf2f1), mRNA [NM_001007711]                                        | 6,733 |
| Mov10      | Rattus norvegicus Moloney leukemia virus 10 (Mov10), mRNA [NM_001107711]                                                               | 6,732 |
| Kcnma1     | Rattus norvegicus potassium large conductance calcium-activated channel, subfamily M, alpha member 1 (Kcnma1), mRNA [NM_031828]        | 6,732 |
| Setbp1     | PREDICTED: Rattus norvegicus SET binding protein 1 (Setbp1), mRNA [XM_225744]                                                          | 6,731 |
| Sox14      | Rattus norvegicus SRY (sex determining region Y)-box 14 (Sox14), mRNA [NM_001106850]                                                   | 6,731 |
| Ostbeta    | Uncharacterized protein [Source:UniProtKB/TrEMBL;Acc:D3ZYJ2] [ENSRNOT00000042353]                                                      | 6,731 |
| 0          | Rattus norvegicus TL0ADA12YH10 mRNA sequence. [FQ223342]                                                                               | 6,730 |
| Fam53b     | Rattus norvegicus family with sequence similarity 53, member B (Fam53b), mRNA [NM_001107556]                                           | 6,729 |
| LOC362901  | Rattus norvegicus Ac1254 (LOC362901), mRNA [NM_001008877]                                                                              | 6,729 |
| Rpgr       | Rattus norvegicus retinitis pigmentosa GTPase regulator (Rpgr), mRNA [NM_001127601]                                                    | 6,729 |
| 0          | Unknown                                                                                                                                | 6,729 |
| 0          | Unknown                                                                                                                                | 6,728 |
| LOC685226  | Uncharacterized protein [Source:UniProtKB/TrEMBL;Acc:D3Z9V3] [ENSRNOT00000045972]                                                      | 6,727 |
| RGD1563091 | PREDICTED: Rattus norvegicus similar to OEF2 (RGD1563091), mRNA [XM_575365]                                                            | 6,726 |
| 0          | Unknown                                                                                                                                | 6,725 |
| RT1-CI     | Rattus norvegicus RT1 class Ib, locus CI (RT1-CI), mRNA [NM_206848]                                                                    | 6,725 |
| Ttc19      | Rattus norvegicus tetratricopeptide repeat domain 19 (Ttc19), mRNA [NM_001109644]                                                      | 6,724 |

|           |                                                                                                                                                                          |              |
|-----------|--------------------------------------------------------------------------------------------------------------------------------------------------------------------------|--------------|
| Atp5j     | Rattus norvegicus ATP synthase, H <sup>+</sup> transporting, mitochondrial F0 complex, subunit F6 (Atp5j), nuclear gene encoding mitochondrial protein, mRNA [NM_053602] | <b>6,723</b> |
| Znf606    | PREDICTED: Rattus norvegicus zinc finger protein 606 (Znf606), mRNA [XM_001063437]                                                                                       | <b>6,722</b> |
| Spag4     | Rattus norvegicus sperm associated antigen 4 (Spag4), mRNA [NM_031792]                                                                                                   | <b>6,722</b> |
| Nrcam     | Rattus norvegicus neuronal cell adhesion molecule (Nrcam), mRNA [NM_013150]                                                                                              | <b>6,720</b> |
| Idh3g     | Rattus norvegicus isocitrate dehydrogenase 3 (NAD), gamma (Idh3g), nuclear gene encoding mitochondrial protein, mRNA [NM_031551]                                         | <b>6,720</b> |
| 0         | Unknown                                                                                                                                                                  | <b>6,720</b> |
| Lrrc46    | Rattus norvegicus leucine rich repeat containing 46 (Lrrc46), mRNA [NM_001004201]                                                                                        | <b>6,719</b> |
| 0         | Q264C8_MYCVN (Q264C8) Response regulator receiver:LytTr DNA-binding region, partial (9%) [TC583267]                                                                      | <b>6,719</b> |
| Ndufa7    | Rattus norvegicus NADH dehydrogenase (ubiquinone) 1 alpha subcomplex, 7 (B14.5a) (Ndufa7), nuclear gene encoding mitochondrial protein, mRNA [NM_001106772]              | <b>6,719</b> |
| 0         | Uncharacterized protein [Source:UniProtKB/TrEMBL;Acc:D3ZYM6] [ENSRNOT00000057216]                                                                                        | <b>6,718</b> |
| Smad2     | Rattus norvegicus SMAD family member 2 (Smad2), mRNA [NM_019191]                                                                                                         | <b>6,718</b> |
| Slit3     | Rattus norvegicus slit homolog 3 (Drosophila) (Slit3), mRNA [NM_031321]                                                                                                  | <b>6,718</b> |
| Ncr1      | Rattus norvegicus natural cytotoxicity triggering receptor 1 (Ncr1), mRNA [NM_057199]                                                                                    | <b>6,717</b> |
| Vps29     | Rattus norvegicus vacuolar protein sorting 29 homolog (S. cerevisiae) (Vps29), mRNA [NM_001105932]                                                                       | <b>6,716</b> |
| Ddx49     | Rattus norvegicus DEAD (Asp-Glu-Ala-Asp) box polypeptide 49 (Ddx49), mRNA [NM_001115023]                                                                                 | <b>6,716</b> |
| Hspa2     | Rattus norvegicus heat shock protein 2 (Hspa2), mRNA [NM_021863]                                                                                                         | <b>6,715</b> |
| Itm2c     | Rattus norvegicus integral membrane protein 2C (Itm2c), mRNA [NM_001009674]                                                                                              | <b>6,715</b> |
| Wdr75     | Rattus norvegicus WD repeat domain 75 (Wdr75), mRNA [NM_001047889]                                                                                                       | <b>6,714</b> |
| Kank4     | Rattus norvegicus KN motif and ankyrin repeat domains 4 (Kank4), mRNA [NM_001107947]                                                                                     | <b>6,714</b> |
| Slc30a10  | Rattus norvegicus solute carrier family 30, member 10 (Slc30a10), mRNA [NM_001105985]                                                                                    | <b>6,714</b> |
| Nes       | Rattus norvegicus nestin (Nes), mRNA [NM_012987]                                                                                                                         | <b>6,713</b> |
| LOC307974 | Rattus norvegicus similar to dJ1016N21.1 (novel protein (ortholog of Drosophila Pecanex (PCX), similar to KIAA0805)) (LOC307974), mRNA [XM_226603]                       | <b>6,713</b> |
| 0         | Uncharacterized protein [Source:UniProtKB/TrEMBL;Acc:D4A2D0] [ENSRNOT00000043578]                                                                                        | <b>6,713</b> |
| Frmd4a    | Rattus norvegicus FERM domain containing 4A (Frmd4a), mRNA [NM_001191821]                                                                                                | <b>6,713</b> |
| Slc35d1   | Rattus norvegicus solute carrier family 35 (UDP-glucuronic acid/UDP-N-acetylgalactosamine dual transporter), member D1 (Slc35d1), mRNA [NM_001106668]                    | <b>6,712</b> |
| Ccnjl     | Rattus norvegicus cyclin J-like (Ccnjl), mRNA [NM_001037773]                                                                                                             | <b>6,711</b> |
| Itgb1     | Rattus norvegicus integrin, beta 1 (Itgb1), mRNA [NM_017022]                                                                                                             | <b>6,710</b> |
| Gucy1b3   | Rattus norvegicus guanylate cyclase 1, soluble, beta 3 (Gucy1b3), mRNA [NM_012769]                                                                                       | <b>6,710</b> |
| Hao1      | Rattus norvegicus hydroxyacid oxidase (glycolate oxidase) 1 (Hao1), mRNA [NM_001107780]                                                                                  | <b>6,709</b> |
| Olr825    | Rattus norvegicus olfactory receptor 825 (Olr825), mRNA [NM_001000904]                                                                                                   | <b>6,708</b> |

|            |                                                                                                                                    |       |
|------------|------------------------------------------------------------------------------------------------------------------------------------|-------|
| Fam114a2   | Uncharacterized protein [Source:UniProtKB/TrEMBL;Acc:D3ZC89] [ENSRNOT00000058619]                                                  | 6,708 |
| RGD1565972 | Rattus norvegicus similar to hypothetical protein 4932411G14 (RGD1565972), mRNA [NM_001134606]                                     | 6,707 |
| 0          | Unknown                                                                                                                            | 6,707 |
| Fdxacb1    | Rattus norvegicus ferredoxin-fold anticodon binding domain containing 1 (Fdxacb1), mRNA [NM_001108145]                             | 6,706 |
| 0          | Uncharacterized protein [Source:UniProtKB/TrEMBL;Acc:D3ZDA4] [ENSRNOT00000065619]                                                  | 6,705 |
| Rnaset2    | Rattus norvegicus ribonuclease T2 (Rnaset2), mRNA [NM_001106210]                                                                   | 6,705 |
| Ss18       | Rattus norvegicus synovial sarcoma translocation, Chromosome 18 (Ss18), mRNA [NM_001100900]                                        | 6,704 |
| Kti12      | Rattus norvegicus KTI12 homolog, chromatin associated ( <i>S. cerevisiae</i> ) (Kti12), mRNA [NM_001044288]                        | 6,703 |
| Ahcy       | Rattus norvegicus adenosylhomocysteinase (Ahcy), mRNA [NM_017201]                                                                  | 6,702 |
| Amd1       | Rattus norvegicus adenosylmethionine decarboxylase 1 (Amd1), mRNA [NM_031011]                                                      | 6,702 |
| Pcsk1      | Rattus norvegicus proprotein convertase subtilisin/kexin type 1 (Pcsk1), mRNA [NM_017091]                                          | 6,702 |
| Psip1      | Rattus norvegicus PC4 and SFRS1 interacting protein 1 (Psip1), mRNA [NM_175765]                                                    | 6,701 |
| Zfp2       | Rattus norvegicus zinc finger protein 2 (Zfp2), mRNA [NM_001127558]                                                                | 6,701 |
| Pirt       | Rattus norvegicus phosphoinositide-interacting regulator of transient receptor potential channels (Pirt), mRNA [NM_001109032]      | 6,700 |
| Aoc2       | Rattus norvegicus amine oxidase, copper containing 2 (retina-specific) (Aoc2), non-coding RNA [NR_033180]                          | 6,700 |
| Serp2      | Rattus norvegicus stress-associated endoplasmic reticulum protein family member 2 (Serp2), mRNA [NM_001109104]                     | 6,700 |
| Irx5       | Rattus norvegicus iroquois homeobox 5 (Irx5), mRNA [NM_001030044]                                                                  | 6,700 |
| Fam71d     | Rattus norvegicus family with sequence similarity 71, member D (Fam71d), mRNA [NM_001017469]                                       | 6,699 |
| RGD1311847 | Rattus norvegicus similar to 1700030K09Rik protein (RGD1311847), mRNA [NM_001013879]                                               | 6,699 |
| Cstf3      | Rattus norvegicus cleavage stimulation factor, 3' pre-RNA, subunit 3 (Cstf3), mRNA [NM_001077672]                                  | 6,698 |
| Trappc10   | Rattus norvegicus trafficking protein particle complex 10 (Trappc10), mRNA [NM_001173528]                                          | 6,698 |
| Chmp7      | Rattus norvegicus CHMP family, member 7 (Chmp7), mRNA [NM_001108872]                                                               | 6,698 |
| Cdc37      | Rattus norvegicus cell division cycle 37 homolog ( <i>S. cerevisiae</i> ) (Cdc37), mRNA [NM_053743]                                | 6,697 |
| Xpo6       | Rattus norvegicus exportin 6 (Xpo6), mRNA [NM_001011935]                                                                           | 6,697 |
| LOC686785  | PREDICTED: Rattus norvegicus similar to N-acetyltransferase, homolog of <i>S. cerevisiae</i> ARD1 (LOC686785), miscRNA [XR_009033] | 6,697 |
| Nup98      | Rattus norvegicus nucleoporin (Nup98) mRNA, complete cds. [L39991]                                                                 | 6,696 |
| Mog        | Rattus norvegicus myelin oligodendrocyte glycoprotein (Mog), mRNA [NM_022668]                                                      | 6,695 |
| Pou3f4     | Rattus norvegicus POU class 3 homeobox 4 (Pou3f4), mRNA [NM_017252]                                                                | 6,694 |
| Senp3      | Rattus norvegicus Sumo1/sentrin/SMT3 specific peptidase 3 (Senp3), mRNA [NM_001013116]                                             | 6,693 |
| Snapap     | Rattus norvegicus SNAP-associated protein (Snapap), transcript variant 2, mRNA [NM_001025648]                                      | 6,693 |
| LOC684395  | PREDICTED: Rattus norvegicus hypothetical protein LOC684395 (LOC684395), mRNA [XM_001070185]                                       | 6,692 |
| RGD1305500 | Rattus norvegicus similar to hypothetical protein FLJ13188 (RGD1305500), mRNA [NM_001107448]                                       | 6,692 |
| Aipl1      | Rattus norvegicus aryl hydrocarbon receptor-interacting protein-like 1 (Aipl1), mRNA [NM_021590]                                   | 6,690 |
| St6gal2    | AMGNNUC:NRHY4-00050-E9-AV W Rat hypothalamus (10464) Rattus norvegicus cDNA clone nrhy4-00050-e9, mRNA sequence [CB605923]         | 6,690 |

|            |                                                                                                                                                                                                                                |              |
|------------|--------------------------------------------------------------------------------------------------------------------------------------------------------------------------------------------------------------------------------|--------------|
| 0          | Unknown                                                                                                                                                                                                                        | <b>6,689</b> |
| Opalin     | Rattus norvegicus oligodendrocytic myelin paranodal and inner loop protein (Opalin), mRNA [NM_001017386]                                                                                                                       | <b>6,689</b> |
| F2rl2      | Rattus norvegicus coagulation factor II (thrombin) receptor-like 2 (F2rl2), mRNA [NM_053313]                                                                                                                                   | <b>6,688</b> |
| Hadha      | Rattus norvegicus hydroxyacyl-Coenzyme A dehydrogenase/3-ketoacyl-Coenzyme A thiolase/enoyl-Coenzyme A hydratase (trifunctional protein), alpha subunit (Hadha), nuclear gene encoding mitochondrial protein, mRNA [NM_130826] | <b>6,688</b> |
| 0          | Unknown                                                                                                                                                                                                                        | <b>6,688</b> |
| Casr       | Rattus norvegicus calcium-sensing receptor (Casr), mRNA [NM_016996]                                                                                                                                                            | <b>6,686</b> |
| Rev3l      | Rattus norvegicus REV3-like, catalytic subunit of DNA polymerase zeta (yeast) (Rev3l), mRNA [NM_001083966]                                                                                                                     | <b>6,685</b> |
| Gpr98      | PREDICTED: Rattus norvegicus G protein-coupled receptor 98 (Gpr98), mRNA [XM_002725894]                                                                                                                                        | <b>6,685</b> |
| Arhgef15   | Rattus norvegicus Rho guanine nucleotide exchange factor (GEF) 15 (Arhgef15), mRNA [NM_001105789]                                                                                                                              | <b>6,684</b> |
| LOC688778  | PREDICTED: Rattus norvegicus similar to fatty aldehyde dehydrogenase-like (LOC688778), mRNA [XM_001068253]                                                                                                                     | <b>6,684</b> |
| Sult5a1    | Rattus norvegicus sulfotransferase family 5A, member 1 (Sult5a1), transcript variant 2, mRNA [NM_001106194]                                                                                                                    | <b>6,683</b> |
| Mdfic      | Rattus norvegicus MyoD family inhibitor domain containing (Mdfic), mRNA [NM_001105668]                                                                                                                                         | <b>6,683</b> |
| Abcb8      | Rattus norvegicus ATP-binding cassette, subfamily B (MDR/TAP), member 8 (Abcb8), nuclear gene encoding mitochondrial protein, mRNA [NM_001007796]                                                                              | <b>6,682</b> |
| 0          | Unknown                                                                                                                                                                                                                        | <b>6,682</b> |
| Cd81       | Rattus norvegicus Cd81 molecule (Cd81), mRNA [NM_013087]                                                                                                                                                                       | <b>6,680</b> |
| LOC500684  | Rattus norvegicus hypothetical protein LOC500684 (LOC500684), mRNA [NM_001047959]                                                                                                                                              | <b>6,680</b> |
| Grid2      | Rattus norvegicus glutamate receptor, ionotropic, delta 2 (Grid2), mRNA [NM_024379]                                                                                                                                            | <b>6,679</b> |
| 0          | Unknown                                                                                                                                                                                                                        | <b>6,679</b> |
| 0          | Core histone macro-H2A.1 [Source:UniProtKB/Swiss-Prot;Acc:Q02874] [ENSRNOT00000015632]                                                                                                                                         | <b>6,678</b> |
| 0          | Unknown                                                                                                                                                                                                                        | <b>6,677</b> |
| LOC686041  | Rattus norvegicus cDNA clone IMAGE:6889638, partial cds. [BC059164]                                                                                                                                                            | <b>6,677</b> |
| Cldnd2     | Rattus norvegicus claudin domain containing 2 (Cldnd2), mRNA [NM_001109143]                                                                                                                                                    | <b>6,676</b> |
| Plekho2    | Uncharacterized protein [Source:UniProtKB/TrEMBL;Acc:D3Z9K4] [ENSRNOT00000042633]                                                                                                                                              | <b>6,675</b> |
| Acpp       | Rattus norvegicus acid phosphatase, prostate (Acpp), transcript variant 1, mRNA [NM_001134901]                                                                                                                                 | <b>6,673</b> |
| Abcc5      | Rattus norvegicus ATP-binding cassette, subfamily C (CFTR/MRP), member 5 (Abcc5), mRNA [NM_053924]                                                                                                                             | <b>6,673</b> |
| 0          | Z20D2_MOUSE (O88878) Zinc finger A20 domain-containing protein 2 (Zinc finger protein 216), complete [TC586066]                                                                                                                | <b>6,671</b> |
| RGD1563120 | PREDICTED: Rattus norvegicus similar to RIKEN cDNA 2210009G21 (RGD1563120), mRNA [XM_001081289]                                                                                                                                | <b>6,671</b> |
| Znf286a    | Rattus norvegicus zinc finger protein 286A (Znf286a), mRNA [NM_001191921]                                                                                                                                                      | <b>6,670</b> |
| Amz2       | Rattus norvegicus archaelysin family metallopeptidase 2 (Amz2), mRNA [NM_001014121]                                                                                                                                            | <b>6,669</b> |
| Btaf1      | Rattus norvegicus BTAF1 RNA polymerase II, B-TFIID transcription factor-associated, (Mot1 homolog, S. cerevisiae) (Btaf1), mRNA [NM_001191917]                                                                                 | <b>6,669</b> |
| 0          | Unknown                                                                                                                                                                                                                        | <b>6,666</b> |

|            |                                                                                                                                                                                            |       |
|------------|--------------------------------------------------------------------------------------------------------------------------------------------------------------------------------------------|-------|
| Nxph1      | Rattus norvegicus neurexophilin 1 (Nxph1), mRNA [NM_012994]                                                                                                                                | 6,665 |
| Fars2      | Rattus norvegicus phenylalanyl-tRNA synthetase 2, mitochondrial (Fars2), nuclear gene encoding mitochondrial protein, mRNA [NM_001013139]                                                  | 6,665 |
| Cd99       | Rattus norvegicus CD99 antigen (Cd99), mRNA [NM_001100804]                                                                                                                                 | 6,664 |
| Ehmt2      | Rattus norvegicus euchromatic histone lysine N-methyltransferase 2 (Ehmt2), mRNA [NM_212463]                                                                                               | 6,664 |
| Gins1      | Rattus norvegicus GINS complex subunit 1 (Psf1 homolog) (Gins1), mRNA [NM_001109207]                                                                                                       | 6,663 |
| Ebf2       | Rattus norvegicus early B-cell factor 2 (Ebf2), mRNA [NM_001108383]                                                                                                                        | 6,663 |
| Fam19a2    | Unknown                                                                                                                                                                                    | 6,661 |
| 0          | Unknown                                                                                                                                                                                    | 6,661 |
| 0          | Unknown                                                                                                                                                                                    | 6,659 |
| 0          | Unknown                                                                                                                                                                                    | 6,658 |
| Zbed4      | Rattus norvegicus zinc finger, BED-type containing 4 (Zbed4), mRNA [NM_001134800]                                                                                                          | 6,657 |
| B3galt4    | Rattus norvegicus UDP-Gal:betaGlcNAc beta 1,3-galactosyltransferase, polypeptide 4 (B3galt4), mRNA [NM_133553]                                                                             | 6,657 |
| Spopl      | Rattus norvegicus speckle-type POZ protein-like (Spopl), mRNA [NM_001134447]                                                                                                               | 6,657 |
| RGD1309077 | Rattus norvegicus similar to putative RNA methyltransferase (RGD1309077), mRNA [NM_001108282]                                                                                              | 6,655 |
| Trim23     | Rattus norvegicus tripartite motif-containing 23 (Trim23), mRNA [NM_001100637]                                                                                                             | 6,655 |
| Sp7        | Rattus norvegicus Sp7 transcription factor (Sp7), transcript variant 1, mRNA [NM_001037632]                                                                                                | 6,654 |
| Man2a2     | Rattus norvegicus mannosidase 2, alpha 2 (Man2a2), mRNA [NM_001107527]                                                                                                                     | 6,654 |
| Mrpl34     | Rattus norvegicus mitochondrial ribosomal protein L34 (Mrpl34), nuclear gene encoding mitochondrial protein, mRNA [NM_001006965]                                                           | 6,654 |
| 0          | Uncharacterized protein [Source:UniProtKB/TrEMBL;Acc:D3ZF29] [ENSRNOT00000012203]                                                                                                          | 6,653 |
| 0          | AGENCOURT_28718588 NIH_MGC_249 Rattus norvegicus cDNA clone IMAGE:7378234 5', mRNA sequence [CO802318]                                                                                     | 6,653 |
| 0          | Unknown                                                                                                                                                                                    | 6,653 |
| LOC685240  | PREDICTED: Rattus norvegicus similar to High mobility group protein 1 (HMG-1) (High mobility group protein B1) (Amphoterin) (Heparin-binding protein p30) (LOC685240), miscRNA [XR_085878] | 6,652 |
| Zbtb7b     | Rattus norvegicus zinc finger and BTB domain containing 7B (Zbtb7b), mRNA [NM_001106446]                                                                                                   | 6,652 |
| 0          | Unknown                                                                                                                                                                                    | 6,651 |
| Slc9a3     | Rattus norvegicus solute carrier family 9 (sodium/hydrogen exchanger), member 3 (Slc9a3), mRNA [NM_012654]                                                                                 | 6,649 |
| Apba3      | Rattus norvegicus amyloid beta (A4) precursor protein-binding, family A, member 3 (Apba3), mRNA [NM_031781]                                                                                | 6,649 |
| Nr0b1      | Rattus norvegicus nuclear receptor subfamily 0, group B, member 1 (Nr0b1), mRNA [NM_053317]                                                                                                | 6,649 |
| Fam71a     | Rattus norvegicus family with sequence similarity 71, member A (Fam71a), mRNA [NM_001109084]                                                                                               | 6,649 |
| Znf521     | Rattus norvegicus zinc finger protein 521 (Znf521), mRNA [NM_001107403]                                                                                                                    | 6,647 |
| Epha5      | Rattus norvegicus EphA5 (Epha5), transcript variant 2, mRNA [NM_024367]                                                                                                                    | 6,647 |
| Lpcat3     | Rattus norvegicus lysophosphatidylcholine acyltransferase 3 (Lpcat3), mRNA [NM_001012189]                                                                                                  | 6,647 |
| Shd        | Rattus norvegicus src homology 2 domain-containing transforming protein D (Shd), mRNA [NM_001108223]                                                                                       | 6,646 |
| 0          | Unknown                                                                                                                                                                                    | 6,646 |



|              |                                                                                                                                                          |              |
|--------------|----------------------------------------------------------------------------------------------------------------------------------------------------------|--------------|
| LOC361963    | PREDICTED: Rattus norvegicus similar to phosphoglycerate mutase (EC 5.4.2.1) B chain - rat (LOC361963), miscRNA [XR_086660]                              | <b>6,644</b> |
| Cited4       | Rattus norvegicus Cbp/p300-interacting transactivator, with Glu/Asp-rich carboxy-terminal domain, 4 (Cited4), mRNA [NM_053699]                           | <b>6,644</b> |
| 0            | Unknown                                                                                                                                                  | <b>6,644</b> |
| Agrp         | Rattus norvegicus agouti related protein homolog (mouse) (Agrp), mRNA [NM_033650]                                                                        | <b>6,643</b> |
| Timm23       | Rattus norvegicus translocase of inner mitochondrial membrane 23 homolog (yeast) (Timm23), nuclear gene encoding mitochondrial protein, mRNA [NM_019352] | <b>6,643</b> |
| Zbtb37       | Rattus norvegicus zinc finger and BTB domain containing 37 (Zbtb37), mRNA [NM_001107191]                                                                 | <b>6,641</b> |
| Gripap1      | Rattus norvegicus GRIP1 associated protein 1 (Gripap1), mRNA [NM_053807]                                                                                 | <b>6,640</b> |
| 0            | Uncharacterized protein [Source:UniProtKB/TrEMBL;Acc:D4A0B5] [ENSRNOT00000064837]                                                                        | <b>6,640</b> |
| Mrpl23       | Rattus norvegicus mitochondrial ribosomal protein L23 (Mrpl23), nuclear gene encoding mitochondrial protein, mRNA [NM_022529]                            | <b>6,640</b> |
| Bace2        | Rattus norvegicus beta-site APP-cleaving enzyme 2 (Bace2), mRNA [NM_001002802]                                                                           | <b>6,640</b> |
| LOC100362727 | PREDICTED: Rattus norvegicus ubiquitin carboxyl-terminal hydrolase CYLD (LOC100362727), mRNA [XM_002728578]                                              | <b>6,639</b> |
| Acaa2        | Rattus norvegicus acetyl-Coenzyme A acyltransferase 2 (Acaa2), nuclear gene encoding mitochondrial protein, mRNA [NM_130433]                             | <b>6,638</b> |
| Zgpat        | Rattus norvegicus zinc finger, CCCH-type with G patch domain (Zgpat), mRNA [NM_001009656]                                                                | <b>6,638</b> |
| Ric3         | Rattus norvegicus resistance to inhibitors of cholinesterase 3 homolog (C. elegans) (Ric3), mRNA [NM_001115045]                                          | <b>6,638</b> |
| Ftsj1        | Uncharacterized protein [Source:UniProtKB/TrEMBL;Acc:D3ZZA1] [ENSRNOT00000006365]                                                                        | <b>6,638</b> |
| 0            | Thyroid hormone receptor associated protein 2 (Predicted)Uncharacterized protein [Source:UniProtKB/TrEMBL;Acc:D3ZJC6] [ENSRNOT00000042331]               | <b>6,637</b> |
| Dnajc11      | Rattus norvegicus DnaJ (Hsp40) homolog, subfamily C, member 11 (Dnajc11), mRNA [NM_001108694]                                                            | <b>6,636</b> |
| Lrrc16b      | Leucine-rich repeat-containing protein 16B [Source:UniProtKB/Swiss-Prot;Acc:Q5XHY1] [ENSRNOT00000032252]                                                 | <b>6,636</b> |
| Usp24        | Putative uncharacterized protein [Source:UniProtKB/TrEMBL;Acc:Q4G007] [ENSRNOT00000029228]                                                               | <b>6,635</b> |
| Phf7         | Rattus norvegicus PHD finger protein 7 (Phf7), mRNA [NM_001012211]                                                                                       | <b>6,635</b> |
| Oas2         | Rattus norvegicus 2'-5' oligoadenylate synthetase 2 (Oas2), mRNA [NM_001009715]                                                                          | <b>6,635</b> |
| Adam11       | Rattus norvegicus ADAM metallopeptidase domain 11 (Adam11), mRNA [NM_001108300]                                                                          | <b>6,635</b> |
| Dap3         | Rattus norvegicus death associated protein 3 (Dap3), nuclear gene encoding mitochondrial protein, mRNA [NM_001011950]                                    | <b>6,635</b> |
| LOC681367    | PREDICTED: Rattus norvegicus hypothetical protein LOC681367 (LOC681367), mRNA [XM_001061427]                                                             | <b>6,634</b> |
| 0            | Unknown                                                                                                                                                  | <b>6,633</b> |
| S100a1       | Rattus norvegicus S100 calcium binding protein A1 (S100a1), mRNA [NM_001007636]                                                                          | <b>6,633</b> |
| Anubl1       | Rattus norvegicus AN1, ubiquitin-like, homolog (Xenopus laevis) (Anubl1), mRNA [NM_173332]                                                               | <b>6,633</b> |
| Usp28        | Rattus norvegicus ubiquitin specific peptidase 28 (Usp28), mRNA [NM_001108144]                                                                           | <b>6,633</b> |
| Upp1         | Rattus norvegicus uridine phosphorylase 1 (Upp1), mRNA [NM_001030025]                                                                                    | <b>6,633</b> |
| Fhl4         | Rattus norvegicus four and a half LIM domains 4 (Fhl4), mRNA [NM_001013172]                                                                              | <b>6,632</b> |
| Zdhhc7       | Rattus norvegicus zinc finger, DHHC-type containing 7 (Zdhhc7), mRNA [NM_133394]                                                                         | <b>6,632</b> |
| 0            | Unknown                                                                                                                                                  | <b>6,632</b> |

|            |                                                                                                                                                                                                               |              |
|------------|---------------------------------------------------------------------------------------------------------------------------------------------------------------------------------------------------------------|--------------|
| Epn3       | Rattus norvegicus epsin 3 (Epn3), mRNA [NM_001024791]                                                                                                                                                         | <b>6,632</b> |
| Giot1      | Rattus norvegicus gonadotropin inducible ovarian transcription factor 1 (Giot1), mRNA [NM_133563]                                                                                                             | <b>6,631</b> |
| RGD1305178 | Rattus norvegicus similar to Hypothetical protein MGC11690 (RGD1305178), mRNA [NM_001025003]                                                                                                                  | <b>6,630</b> |
| Heatr5a    | Uncharacterized protein [Source:UniProtKB/TrEMBL;Acc:D3ZKL2] [ENSRNOT00000035309]                                                                                                                             | <b>6,629</b> |
| 0          | Unknown                                                                                                                                                                                                       | <b>6,629</b> |
| Zadh2      | Rattus norvegicus zinc binding alcohol dehydrogenase, domain containing 2 (Zadh2), mRNA [NM_001106129]                                                                                                        | <b>6,629</b> |
| Casp3      | Rattus norvegicus caspase 3 (Casp3), mRNA [NM_012922]                                                                                                                                                         | <b>6,628</b> |
| Ns5atp4    | Rattus norvegicus NS5A (hepatitis C virus) transactivated protein 4 (Ns5atp4), mRNA [NM_207607]                                                                                                               | <b>6,625</b> |
| RGD1564927 | Rattus norvegicus similar to TGFB-induced factor 2 (RGD1564927), mRNA [NM_001134983]                                                                                                                          | <b>6,624</b> |
| 0          | DDX27_MOUSE (Q921N6) Probable ATP-dependent RNA helicase DDX27 (DEAD box protein 27) , partial (74%) [TC616929]                                                                                               | <b>6,624</b> |
| Pcdhga10   | Rattus norvegicus protocadherin gamma subfamily A, 10 (Pcdhga10), mRNA [NM_001037135]                                                                                                                         | <b>6,624</b> |
| 0          | Unknown                                                                                                                                                                                                       | <b>6,623</b> |
| Ccdc76     | Rattus norvegicus coiled-coil domain containing 76 (Ccdc76), mRNA [NM_001033902]                                                                                                                              | <b>6,622</b> |
| Cd6        | Rattus norvegicus Cd6 molecule (Cd6), mRNA [NM_175577]                                                                                                                                                        | <b>6,622</b> |
| Atp8b3     | Uncharacterized protein [Source:UniProtKB/TrEMBL;Acc:D3ZE62] [ENSRNOT00000039813]                                                                                                                             | <b>6,621</b> |
| L3mbtl     | Uncharacterized protein [Source:UniProtKB/TrEMBL;Acc:D4A6H6] [ENSRNOT00000045677]                                                                                                                             | <b>6,620</b> |
| Uba52      | Rattus norvegicus ubiquitin A-52 residue ribosomal protein fusion product 1 (Uba52), mRNA [NM_031687]                                                                                                         | <b>6,619</b> |
| RGD1305627 | Rattus norvegicus hypothetical LOC314467 (RGD1305627), mRNA [NM_001134560]                                                                                                                                    | <b>6,618</b> |
| Exnef      | Rattus norvegicus exonuclease NEF-sp (Exnef), mRNA [NM_001079706]                                                                                                                                             | <b>6,618</b> |
| LOC687426  | PREDICTED: Rattus norvegicus similar to G protein-coupled receptor 133 (LOC687426), miscRNA [XR_085591]                                                                                                       | <b>6,617</b> |
| 0          | Unknown                                                                                                                                                                                                       | <b>6,617</b> |
| RGD1311501 | Rattus norvegicus similar to chromosome 9 open reading frame 7 (RGD1311501), mRNA [NM_001106561]                                                                                                              | <b>6,617</b> |
| lqcb1      | Rattus norvegicus IQ motif containing B1 (lqcb1), mRNA [NM_001107092]                                                                                                                                         | <b>6,616</b> |
| Odz2       | Rattus norvegicus odz, odd Oz/ten-m homolog 2 (Drosophila) (Odz2), mRNA [NM_020088]                                                                                                                           | <b>6,615</b> |
| 0          | Unknown                                                                                                                                                                                                       | <b>6,613</b> |
| Slc1a6     | Rattus norvegicus solute carrier family 1 (high affinity aspartate/glutamate transporter), member 6 (Slc1a6), mRNA [NM_032065]                                                                                | <b>6,612</b> |
| Mcpt114    | Mast cell protease 1-like 4 [Source:UniProtKB/TrEMBL;Acc:Q6IE57] [ENSRNOT00000043182]                                                                                                                         | <b>6,612</b> |
| Evx2       | PREDICTED: Rattus norvegicus even skipped homeotic gene 2 (Evx2), mRNA [XM_001063297]                                                                                                                         | <b>6,612</b> |
| Btbd12     | PREDICTED: Rattus norvegicus BTB (POZ) domain containing 12 (Btbd12), mRNA [XM_001079342]                                                                                                                     | <b>6,612</b> |
| Pogk       | Rattus norvegicus pogo transposable element with KRAB domain (Pogk), mRNA [NM_001107194]                                                                                                                      | <b>6,611</b> |
| Pebp1      | Rattus norvegicus phosphatidylethanolamine binding protein 1 (Pebp1), mRNA [NM_017236]                                                                                                                        | <b>6,611</b> |
| Gdi2       | Rattus norvegicus GDP dissociation inhibitor 2 (Gdi2), mRNA [NM_017276]                                                                                                                                       | <b>6,610</b> |
| Magmas     | Rattus norvegicus mitochondria-associated protein involved in granulocyte-macrophage colony-stimulating factor signal transduction (Magmas), nuclear gene encoding mitochondrial protein, mRNA [NM_001100136] | <b>6,608</b> |

|              |                                                                                                                       |              |
|--------------|-----------------------------------------------------------------------------------------------------------------------|--------------|
| 0            | WSP1_SCHPO (O36027) Wiskott-Aldrich syndrome homolog protein 1, partial (5%) [TC645988]                               | <b>6,607</b> |
| Scarf1       | Rattus norvegicus scavenger receptor class F, member 1 (Scarf1), mRNA [NM_001107022]                                  | <b>6,606</b> |
| Cyfp1        | Rattus norvegicus cytoplasmic FMR1 interacting protein 1 (Cyfp1), mRNA [NM_001107517]                                 | <b>6,606</b> |
| Smpd2        | Rattus norvegicus sphingomyelin phosphodiesterase 2, neutral membrane (Smpd2), mRNA [NM_031360]                       | <b>6,605</b> |
| LOC100362172 | LRRGT00112-like (LOC100362172), mRNA [Source:RefSeq DNA;Acc:NM_001177820] [ENSRNOT00000043267]                        | <b>6,605</b> |
| Smox         | Rattus norvegicus spermine oxidase (Smox), mRNA [NM_001134854]                                                        | <b>6,603</b> |
| Senp2        | Rattus norvegicus Sumo1/sentrin/SMT3 specific peptidase 2 (Senp2), mRNA [NM_023989]                                   | <b>6,601</b> |
| Srpx2        | Rattus norvegicus sushi-repeat-containing protein, X-linked 2 (Srpx2), mRNA [NM_001108243]                            | <b>6,601</b> |
| Mpn2         | PREDICTED: Rattus norvegicus marapsin 2 (Mpn2), mRNA [XM_001077024]                                                   | <b>6,601</b> |
| Hbb-b1       | Rattus norvegicus hemoglobin, beta adult major chain (Hbb-b1), mRNA [NM_198776]                                       | <b>6,600</b> |
| 0            | Rattus norvegicus similar to 25kDa nuclear protein (LOC301683), mRNA [XM_237488]                                      | <b>6,598</b> |
| LOC502684    | Rattus norvegicus hypothetical protein LOC502684 (LOC502684), mRNA [NM_001025060]                                     | <b>6,597</b> |
| Mut          | PREDICTED: Rattus norvegicus methylmalonyl-Coenzyme A mutase (Mut), mRNA [XM_001067239]                               | <b>6,596</b> |
| Kcnq5l       | Potassium voltage-gated channel KQT-like subfamily member 5 [Source:UniProtKB/TrEMBL;Acc:Q8K3W7] [ENSRNOT00000040034] | <b>6,595</b> |
| Cys1         | Rattus norvegicus cystin 1 (Cys1), mRNA [NM_001109597]                                                                | <b>6,594</b> |
| 0            | Unknown                                                                                                               | <b>6,593</b> |
| Krtap16-5    | Rattus norvegicus keratin associated protein 16-5 (Krtap16-5), mRNA [NM_001109424]                                    | <b>6,593</b> |
| Olr801       | Rattus norvegicus olfactory receptor 801 (Olr801), mRNA [NM_001001004]                                                | <b>6,591</b> |
| Spag9        | Rattus norvegicus sperm associated antigen 9 (Spag9), mRNA [NM_001108290]                                             | <b>6,591</b> |
| Styx11       | Rattus norvegicus serine/threonine/tyrosine interacting-like 1 (Styx11), mRNA [NM_001037788]                          | <b>6,588</b> |
| Trem11       | Rattus norvegicus triggering receptor expressed on myeloid cells-like 1 (Trem11), mRNA [NM_001192001]                 | <b>6,587</b> |
| Odf3         | Rattus norvegicus outer dense fiber of sperm tails 3 (Odf3), mRNA [NM_001108924]                                      | <b>6,587</b> |
| RGD1564327   | Rattus norvegicus similar to integrin alpha 8 (RGD1564327), mRNA [NM_001173972]                                       | <b>6,587</b> |
| Tcerg1       | Rattus norvegicus transcription elongation regulator 1 (Tcerg1), mRNA [NM_001107390]                                  | <b>6,586</b> |
| 0            | Unknown                                                                                                               | <b>6,586</b> |
| Miip         | Rattus norvegicus migration and invasion inhibitory protein (Miip), mRNA [NM_001017450]                               | <b>6,583</b> |
| ltpkb        | Rattus norvegicus inositol 1,4,5-trisphosphate 3-kinase B (ltpkb), mRNA [NM_019312]                                   | <b>6,583</b> |
| RGD1565225   | PREDICTED: Rattus norvegicus similar to Interferon alpha-1 precursor (RGD1565225), mRNA [XM_575856]                   | <b>6,580</b> |
| Ccpg1        | Rattus norvegicus cell cycle progression 1 (Ccpg1), mRNA [NM_001108770]                                               | <b>6,579</b> |
| Ptpn4        | Rattus norvegicus protein tyrosine phosphatase, non-receptor type 4 (Ptpn4), mRNA [NM_001100479]                      | <b>6,579</b> |
| H1f0         | Rattus norvegicus H1 histone family, member 0 (H1f0), mRNA [NM_012578]                                                | <b>6,577</b> |
| Trpc1        | Rattus norvegicus transient receptor potential cation channel, subfamily C, member 1 (Trpc1), mRNA [NM_053558]        | <b>6,576</b> |
| Tmprss5      | Rattus norvegicus transmembrane protease, serine 5 (Tmprss5), mRNA [NM_153311]                                        | <b>6,576</b> |
| Kcnh2        | Rattus norvegicus potassium voltage-gated channel, subfamily H (eag-related), member 2 (Kcnh2), mRNA [NM_053949]      | <b>6,575</b> |

|            |                                                                                                                                    |              |
|------------|------------------------------------------------------------------------------------------------------------------------------------|--------------|
| LOC685152  | Uncharacterized protein [Source:UniProtKB/TrEMBL;Acc:D3ZLY4] [ENSRNOT00000028246]                                                  | <b>6,575</b> |
| Pcsk6      | Rattus norvegicus proprotein convertase subtilisin/kexin type 6 (Pcsk6), mRNA [NM_012999]                                          | <b>6,574</b> |
| Hspb7      | Rattus norvegicus heat shock protein family, member 7 (cardiovascular) (Hspb7), mRNA [NM_031607]                                   | <b>6,573</b> |
| 0          | serine/threonine-protein kinase PINK1, mitochondrial [Source:RefSeq peptide;Acc:NP_001100164] [ENSRNOT00000020820]                 | <b>6,572</b> |
| Ptdss1     | Rattus norvegicus phosphatidylserine synthase 1 (Ptdss1), mRNA [NM_001012113]                                                      | <b>6,571</b> |
| Thumpd2    | Rattus norvegicus THUMP domain containing 2 (Thumpd2), transcript variant 2, mRNA [NM_001012108]                                   | <b>6,571</b> |
| 0          | Unknown                                                                                                                            | <b>6,569</b> |
| 0          | Uncharacterized protein [Source:UniProtKB/TrEMBL;Acc:D3ZN76] [ENSRNOT00000026111]                                                  | <b>6,568</b> |
| 0          | Succinate-semialdehyde dehydrogenase, mitochondrial [Source:UniProtKB/Swiss-Prot;Acc:P51650] [ENSRNOT00000050919]                  | <b>6,568</b> |
| 0          | PREDICTED: Rattus norvegicus similar to hypothetical protein 4930509O22 (RGD1566007), mRNA [XM_346086]                             | <b>6,564</b> |
| Ube2v2     | Rattus norvegicus ubiquitin-conjugating enzyme E2 variant 2 (Ube2v2), mRNA [NM_183052]                                             | <b>6,563</b> |
| Rnaseh2a   | Rattus norvegicus ribonuclease H2, subunit A (Rnaseh2a), mRNA [NM_001013234]                                                       | <b>6,563</b> |
| Bnip3      | Rattus norvegicus BCL2/adenovirus E1B interacting protein 3 (Bnip3), nuclear gene encoding mitochondrial protein, mRNA [NM_053420] | <b>6,562</b> |
| Mrpl36     | Rattus norvegicus mitochondrial ribosomal protein L36 (Mrpl36), nuclear gene encoding mitochondrial protein, mRNA [NM_001108879]   | <b>6,562</b> |
| Rlim       | Rattus norvegicus ring finger protein, LIM domain interacting (Rlim), mRNA [NM_001024892]                                          | <b>6,562</b> |
| Usp3       | Rattus norvegicus ubiquitin specific peptidase 3 (Usp3), mRNA [NM_001025424]                                                       | <b>6,562</b> |
| Limk2      | Rattus norvegicus LIM domain kinase 2 (Limk2), mRNA [NM_024135]                                                                    | <b>6,559</b> |
| 0          | Unknown                                                                                                                            | <b>6,559</b> |
| Lcn10      | Rattus norvegicus lipocalin 10 (Lcn10), mRNA [NM_001128137]                                                                        | <b>6,559</b> |
| Pold1      | Rattus norvegicus polymerase (DNA directed), delta 1, catalytic subunit (Pold1), mRNA [NM_021662]                                  | <b>6,558</b> |
| Vom1r12    | Rattus norvegicus vomeronasal 1 receptor 12 (Vom1r12), mRNA [NM_001008962]                                                         | <b>6,558</b> |
| 0          | Unknown                                                                                                                            | <b>6,557</b> |
| Aloxe3     | Rattus norvegicus arachidonate lipoxygenase 3 (Aloxe3), mRNA [NM_001105793]                                                        | <b>6,555</b> |
| 0          | Unknown                                                                                                                            | <b>6,555</b> |
| Tardbp     | Rattus norvegicus TAR DNA binding protein (Tardbp), mRNA [NM_001011979]                                                            | <b>6,555</b> |
| 0          | Unknown                                                                                                                            | <b>6,555</b> |
| Fig4       | Rattus norvegicus FIG4 homolog (S. cerevisiae) (Fig4), mRNA [NM_001047096]                                                         | <b>6,554</b> |
| RGD1562161 | Rattus norvegicus similar to chromosome X open reading frame 23 (RGD1562161), mRNA [NM_001127568]                                  | <b>6,554</b> |
| Rfwd2      | Rattus norvegicus ring finger and WD repeat domain 2 (Rfwd2), mRNA [NM_001025126]                                                  | <b>6,552</b> |
| Cr1l       | Rattus norvegicus complement component (3b/4b) receptor 1-like (Cr1l), transcript variant 1, mRNA [NM_001005330]                   | <b>6,552</b> |
| Sec23ip    | Rattus norvegicus SEC23 interacting protein (Sec23ip), mRNA [NM_001134859]                                                         | <b>6,552</b> |
| Ltb        | Rattus norvegicus lymphotoxin beta (TNF superfamily, member 3) (Ltb), mRNA [NM_212507]                                             | <b>6,551</b> |
| Zfp277     | PREDICTED: Rattus norvegicus similar to zinc finger protein 277 isoform 1 (LOC298977), mRNA [XM_216701]                            | <b>6,550</b> |
| 0          | Unknown                                                                                                                            | <b>6,550</b> |

|            |                                                                                                                                                                |              |
|------------|----------------------------------------------------------------------------------------------------------------------------------------------------------------|--------------|
| Kif27      | Rattus norvegicus kinesin family member 27 (Kif27), mRNA [NM_198050]                                                                                           | <b>6,549</b> |
| Kcnf1      | Rattus norvegicus potassium voltage-gated channel, subfamily F, member 1 (Kcnf1), mRNA [NM_001169104]                                                          | <b>6,549</b> |
| Rpl39      | Rattus norvegicus ribosomal protein L39 (Rpl39), mRNA [NM_012875]                                                                                              | <b>6,548</b> |
| 0          | Uncharacterized protein [Source:UniProtKB/TrEMBL;Acc:D3ZJ52] [ENSRNOT00000006574]                                                                              | <b>6,547</b> |
| Dusp23     | dual specificity protein phosphatase 23 [Source:RefSeq peptide;Acc:NP_001178759] [ENSRNOT00000030449]                                                          | <b>6,546</b> |
| 0          | Uncharacterized protein [Source:UniProtKB/TrEMBL;Acc:D3ZE35] [ENSRNOT00000027967]                                                                              | <b>6,546</b> |
| 0          | Unknown                                                                                                                                                        | <b>6,545</b> |
| Gsto1      | Rattus norvegicus glutathione S-transferase omega 1 (Gsto1), mRNA [NM_001007602]                                                                               | <b>6,544</b> |
| 0          | Rattus norvegicus similar to 40S ribosomal protein S7 (S8) (LOC289932), mRNA [XM_223834]                                                                       | <b>6,544</b> |
| Zfp324     | RCG27445Uncharacterized protein [Source:UniProtKB/TrEMBL;Acc:D3ZB44] [ENSRNOT00000036874]                                                                      | <b>6,543</b> |
| Cit        | Rattus norvegicus citron (Cit), mRNA [NM_001029911]                                                                                                            | <b>6,543</b> |
| LOC684903  | PREDICTED: Rattus norvegicus similar to Probable ATP-dependent RNA helicase DHX34 (DEAH box protein 34), transcript variant 2 (LOC684903), mRNA [XM_001062397] | <b>6,543</b> |
| Glt8d3     | Rattus norvegicus glycosyltransferase 8 domain containing 3 (Glt8d3), mRNA [NM_001100887]                                                                      | <b>6,542</b> |
| Cpsf4      | Rattus norvegicus cleavage and polyadenylation specific factor 4 (Cpsf4), mRNA [NM_001012351]                                                                  | <b>6,541</b> |
| 0          | Unknown                                                                                                                                                        | <b>6,540</b> |
| Kcnn1      | Rattus norvegicus potassium intermediate/small conductance calcium-activated channel, subfamily N, member 1 (Kcnn1), mRNA [NM_019313]                          | <b>6,538</b> |
| RGD1559841 | PREDICTED: Rattus norvegicus similar to expressed sequence AW413431 (RGD1559841), mRNA [XM_002725411]                                                          | <b>6,536</b> |
| Lmo7       | Rattus norvegicus LIM domain 7 (Lmo7), mRNA [NM_001001515]                                                                                                     | <b>6,536</b> |
| Copb1      | Rattus norvegicus coatomer protein complex, subunit beta 1 (Copb1), mRNA [NM_080781]                                                                           | <b>6,536</b> |
| Acot1      | Rattus norvegicus acyl-CoA thioesterase 1 (Acot1), mRNA [NM_031315]                                                                                            | <b>6,536</b> |
| 0          | Uncharacterized protein [Source:UniProtKB/TrEMBL;Acc:D3ZA88] [ENSRNOT00000055210]                                                                              | <b>6,536</b> |
| 0          | AGENCOURT_31532477 NIH_MGC_238 Rattus norvegicus cDNA clone IMAGE:7456410 5', mRNA sequence [CV119824]                                                         | <b>6,535</b> |
| Car8       | Rattus norvegicus carbonic anhydrase 8 (Car8), mRNA [NM_001009662]                                                                                             | <b>6,532</b> |
| Cc2d1a     | Rattus norvegicus coiled-coil and C2 domain containing 1A (Cc2d1a), mRNA [NM_001013869]                                                                        | <b>6,532</b> |
| 0          | Unknown                                                                                                                                                        | <b>6,532</b> |
| Igfbp2     | Rattus norvegicus insulin-like growth factor binding protein 2 (Igfbp2), mRNA [NM_013122]                                                                      | <b>6,531</b> |
| Dnajc14    | Rattus norvegicus DnaJ (Hsp40) homolog, subfamily C, member 14 (Dnajc14), mRNA [NM_053690]                                                                     | <b>6,531</b> |
| 0          | Uncharacterized protein [Source:UniProtKB/TrEMBL;Acc:D4A9Q0] [ENSRNOT00000029274]                                                                              | <b>6,531</b> |
| LOC691414  | Uncharacterized protein [Source:UniProtKB/TrEMBL;Acc:D3ZAB4] [ENSRNOT00000045621]                                                                              | <b>6,530</b> |
| Tmprss11e  | PREDICTED: Rattus norvegicus transmembrane protease, serine 11e (Tmprss11e), mRNA [XM_001074738]                                                               | <b>6,530</b> |
| 0          | Uncharacterized protein [Source:UniProtKB/TrEMBL;Acc:D3ZCM1] [ENSRNOT00000024516]                                                                              | <b>6,529</b> |
| Schip1     | Rattus norvegicus schwannomin interacting protein 1 (Schip1), mRNA [NM_001100666]                                                                              | <b>6,529</b> |
| Dhx36      | Rattus norvegicus DEAH (Asp-Glu-Ala-His) box polypeptide 36 (Dhx36), mRNA [NM_001107678]                                                                       | <b>6,528</b> |

|            |                                                                                                                                    |              |
|------------|------------------------------------------------------------------------------------------------------------------------------------|--------------|
| Ttl1       | Rattus norvegicus tubulin tyrosine ligase-like family, member 1 (Ttl1), mRNA [NM_001012200]                                        | <b>6,527</b> |
| 0          | Q9QXT9_MOUSE (Q9QXT9) KID2 (Zinc finger protein 354B), partial (12%) [TC642135]                                                    | <b>6,527</b> |
| Arfgef2    | Rattus norvegicus ADP-ribosylation factor guanine nucleotide-exchange factor 2 (brefeldin A-inhibited) (Arfgef2), mRNA [NM_181083] | <b>6,526</b> |
| Avpr2      | Rattus norvegicus arginine vasopressin receptor 2 (Avpr2), mRNA [NM_019136]                                                        | <b>6,526</b> |
| Mier1      | Rattus norvegicus mesoderm induction early response 1 homolog (Xenopus laevis) (Mier1), mRNA [NM_001131012]                        | <b>6,526</b> |
| RGD1563349 | Rattus norvegicus similar to RIKEN cDNA 9330182L06 (RGD1563349), mRNA [NM_001109345]                                               | <b>6,525</b> |
| 0          | Unknown                                                                                                                            | <b>6,524</b> |
| Lefty2     | Rattus norvegicus Left-right determination factor 2 (Lefty2), mRNA [NM_001007556]                                                  | <b>6,523</b> |
| Ube2g2     | Rattus norvegicus ubiquitin-conjugating enzyme E2G 2 (UBC7 homolog, yeast) (Ube2g2), mRNA [NM_001106380]                           | <b>6,523</b> |
| Loxhd1     | Rattus norvegicus lipoxygenase homology domains 1 (Loxhd1), mRNA [NM_001106132]                                                    | <b>6,522</b> |
| Pard6g     | Rattus norvegicus par-6 partitioning defective 6 homolog gamma (C. elegans) (Pard6g), mRNA [NM_001100973]                          | <b>6,522</b> |
| Atg16l1    | Rattus norvegicus ATG16 autophagy related 16-like 1 (S. cerevisiae) (Atg16l1), mRNA [NM_001108809]                                 | <b>6,522</b> |
| Rpl10      | Rattus norvegicus ribosomal protein L10 (Rpl10), mRNA [NM_031100]                                                                  | <b>6,521</b> |
| Tex28      | Rattus norvegicus testis expressed 28 (Tex28), mRNA [NM_001191103]                                                                 | <b>6,521</b> |
| Elp2       | Rattus norvegicus elongation protein 2 homolog (S. cerevisiae) (Elp2), mRNA [NM_001034145]                                         | <b>6,521</b> |
| 0          | Uncharacterized protein [Source:UniProtKB/TrEMBL;Acc:D3ZHR9] [ENSRNOT00000056217]                                                  | <b>6,520</b> |
| 0          | PREDICTED: Rattus norvegicus similar to Dedicator of cytokinesis protein 10 (Protein zizimin 3) (RGD1561963), miscRNA [XR_085916]  | <b>6,520</b> |
| Nfe2l2     | Rattus norvegicus nuclear factor, erythroid derived 2, like 2 (Nfe2l2), mRNA [NM_031789]                                           | <b>6,519</b> |
| RGD1308049 | Uncharacterized protein [Source:UniProtKB/TrEMBL;Acc:D3ZT97] [ENSRNOT00000028509]                                                  | <b>6,519</b> |
| 0          | Unknown                                                                                                                            | <b>6,518</b> |
| 0          | Q8R4G5_MOUSE (Q8R4G5) Truncated N-acetylglucosaminyltransferase V, partial (35%) [TC588091]                                        | <b>6,518</b> |
| 0          | Rattus norvegicus similar to endo B cytokeratin (LOC315493), mRNA [XM_235966]                                                      | <b>6,517</b> |
| Hddc3      | Rattus norvegicus HD domain containing 3 (Hddc3), mRNA [NM_001107528]                                                              | <b>6,516</b> |
| 0          | Unknown                                                                                                                            | <b>6,515</b> |
| 0          | Uncharacterized protein [Source:UniProtKB/TrEMBL;Acc:D3ZW60] [ENSRNOT00000005861]                                                  | <b>6,514</b> |
| 0          | Q3VJI6_9CHLB (Q3VJI6) Helix-turn-helix, Fis-type, partial (5%) [TC623116]                                                          | <b>6,513</b> |
| Nagk       | Rattus norvegicus N-acetylglucosamine kinase (Nagk), mRNA [NM_001037768]                                                           | <b>6,513</b> |
| Tmem103    | Rattus norvegicus transmembrane protein 103 (Tmem103), mRNA [NM_001108782]                                                         | <b>6,512</b> |
| Ryr2       | Rattus norvegicus ryanodine receptor 2, cardiac (Ryr2), transcript variant 2, mRNA [NM_001191043]                                  | <b>6,512</b> |
| Mustn1     | Rattus norvegicus musculoskeletal, embryonic nuclear protein 1 (Mustn1), mRNA [NM_181368]                                          | <b>6,511</b> |
| Slc6a15    | Rattus norvegicus solute carrier family 6 (neutral amino acid transporter), member 15 (Slc6a15), mRNA [NM_172321]                  | <b>6,510</b> |
| Gucy1a3    | Rattus norvegicus guanylate cyclase 1, soluble, alpha 3 (Gucy1a3), mRNA [NM_017090]                                                | <b>6,510</b> |
| Egln1      | Egl nine homolog 1 [Source:UniProtKB/Swiss-Prot;Acc:P59722] [ENSRNOT00000026767]                                                   | <b>6,510</b> |
| Sri        | Rattus norvegicus sorcin (Sri), mRNA [NM_001128190]                                                                                | <b>6,509</b> |

|              |                                                                                                                              |              |
|--------------|------------------------------------------------------------------------------------------------------------------------------|--------------|
| Dqx1         | Rattus norvegicus DEAQ box RNA-dependent ATPase 1 (Dqx1), mRNA [NM_001109407]                                                | <b>6,509</b> |
| LOC682419    | PREDICTED: Rattus norvegicus similar to putative pheromone receptor (Go-VN4) (LOC682419), partial mRNA [XM_001061453]        | <b>6,509</b> |
| 0            | Unknown                                                                                                                      | <b>6,508</b> |
| Pafah2       | Rattus norvegicus platelet-activating factor acetylhydrolase 2 (Pafah2), mRNA [NM_177932]                                    | <b>6,507</b> |
| Lmo7         | Rattus norvegicus LIM domain 7 (Lmo7), mRNA [NM_001001515]                                                                   | <b>6,507</b> |
| Ccdc8        | Rattus norvegicus coiled-coil domain containing 8 (Ccdc8), mRNA [NM_001009533]                                               | <b>6,506</b> |
| Slc27a5      | Rattus norvegicus solute carrier family 27 (fatty acid transporter), member 5 (Slc27a5), mRNA [NM_024143]                    | <b>6,505</b> |
| Vps41        | Rattus norvegicus vacuolar protein sorting 41 homolog (S. cerevisiae) (Vps41), mRNA [NM_001107355]                           | <b>6,503</b> |
| 0            | Unknown                                                                                                                      | <b>6,503</b> |
| Cpne2        | PREDICTED: Rattus norvegicus copine II (Cpne2), mRNA [XM_001062196]                                                          | <b>6,503</b> |
| RGD1306192   | Rattus norvegicus similar to RIKEN cDNA 2310079N02 (RGD1306192), mRNA [NM_001134573]                                         | <b>6,502</b> |
| Ncrna00117   | Rattus norvegicus non-protein coding RNA 117 (Ncrna00117), mRNA [NM_001106022]                                               | <b>6,501</b> |
| 0            | Unknown                                                                                                                      | <b>6,501</b> |
| Dab2         | Rattus norvegicus disabled homolog 2 (Drosophila) (Dab2), mRNA [NM_024159]                                                   | <b>6,500</b> |
| 0            | Unknown                                                                                                                      | <b>6,498</b> |
| T2           | Rattus norvegicus brachyury 2 (T2), mRNA [NM_001161835]                                                                      | <b>6,497</b> |
| Ppp1cc       | Rattus norvegicus protein phosphatase 1, catalytic subunit, gamma isoform (Ppp1cc), mRNA [NM_022498]                         | <b>6,497</b> |
| Fxr1         | Rattus norvegicus fragile X mental retardation, autosomal homolog 1 (Fxr1), mRNA [NM_001012179]                              | <b>6,497</b> |
| LOC689927    | Rattus norvegicus similar to keratin associated protein 10-10 (LOC689927), mRNA [NM_001109555]                               | <b>6,495</b> |
| LOC100365943 | PREDICTED: Rattus norvegicus proteasome subunit alpha type-3-like (LOC100365943), mRNA [XM_002724523]                        | <b>6,494</b> |
| LOC688765    | Rattus norvegicus hypothetical protein LOC688765 (LOC688765), mRNA [NM_001109512]                                            | <b>6,494</b> |
| Sspo         | Rattus norvegicus SCO-spondin (Sspo), mRNA [NM_001007016]                                                                    | <b>6,494</b> |
| 0            | AW254563 UI-R-BJ0-aej-h-01-0-UI.s1 UI-R-BJ0 Rattus norvegicus cDNA clone UI-R-BJ0-aej-h-01-0-UI 3', mRNA sequence [AW254563] | <b>6,494</b> |
| Olr1349      | Rattus norvegicus olfactory receptor 1349 (Olr1349), mRNA [NM_001000484]                                                     | <b>6,494</b> |
| Gstm3        | glutathione S-transferase Mu 3 [Source:RefSeq peptide;Acc:NP_065415] [ENSRNOT00000025800]                                    | <b>6,493</b> |
| Cytsb        | Rattus norvegicus cytospin B (Cytsb), mRNA [NM_001039017]                                                                    | <b>6,492</b> |
| 0            | Uncharacterized protein [Source:UniProtKB/TrEMBL;Acc:D3Z8B7] [ENSRNOT00000057522]                                            | <b>6,492</b> |
| Gng5         | Rattus norvegicus guanine nucleotide binding protein (G protein), gamma 5 (Gng5), mRNA [NM_024377]                           | <b>6,491</b> |
| 0            | Uncharacterized protein [Source:UniProtKB/TrEMBL;Acc:D4AD94] [ENSRNOT00000036604]                                            | <b>6,491</b> |
| lft122       | PREDICTED: Rattus norvegicus intraflagellar transport 122 homolog (Chlamydomonas) (lft122), mRNA [XM_001054604]              | <b>6,490</b> |
| LOC679576    | PREDICTED: Rattus norvegicus hypothetical protein LOC679576 (LOC679576), mRNA [XM_001053562]                                 | <b>6,490</b> |
| Lsm6         | Rattus norvegicus LSM6 homolog, U6 small nuclear RNA associated (S. cerevisiae) (Lsm6), mRNA [NM_001126085]                  | <b>6,490</b> |
| Mpi          | Rattus norvegicus mannose phosphate isomerase (mapped) (Mpi), mRNA [NM_001004081]                                            | <b>6,490</b> |
| Cdk5rap2     | Rattus norvegicus CDK5 regulatory subunit associated protein 2 (Cdk5rap2), mRNA [NM_173134]                                  | <b>6,490</b> |

|            |                                                                                                                       |              |
|------------|-----------------------------------------------------------------------------------------------------------------------|--------------|
| Tmem165    | Rattus norvegicus transmembrane protein 165 (Tmem165), mRNA [NM_001024802]                                            | <b>6,487</b> |
| Tube1      | Rattus norvegicus tubulin, epsilon 1 (Tube1), mRNA [NM_001108536]                                                     | <b>6,486</b> |
| Ahnak2     | PREDICTED: Rattus norvegicus similar to KIAA2019 protein (RGD1309696), mRNA [XM_234572]                               | <b>6,486</b> |
| 0          | Unknown                                                                                                               | <b>6,486</b> |
| Vps45      | Rattus norvegicus vacuolar protein sorting 45 homolog (S. cerevisiae) (Vps45), mRNA [NM_172072]                       | <b>6,486</b> |
| 0          | Unknown                                                                                                               | <b>6,485</b> |
| Ccdc21     | Rattus norvegicus coiled-coil domain containing 21 (Ccdc21), mRNA [NM_001080151]                                      | <b>6,484</b> |
| 0          | Uncharacterized protein [Source:UniProtKB/TrEMBL;Acc:D3ZHU8] [ENSRNOT00000001891]                                     | <b>6,483</b> |
| Fastkd1    | Rattus norvegicus FAST kinase domains 1 (Fastkd1), mRNA [NM_001191738]                                                | <b>6,483</b> |
| Hhat       | PREDICTED: Rattus norvegicus hedgehog acyltransferase (Hhat), mRNA [XM_002728056]                                     | <b>6,481</b> |
| Enpp4      | Rattus norvegicus ectonucleotide pyrophosphatase/phosphodiesterase 4 (Enpp4), mRNA [NM_001106892]                     | <b>6,481</b> |
| Mysm1      | Uncharacterized protein [Source:UniProtKB/TrEMBL;Acc:D4A7T9] [ENSRNOT00000039554]                                     | <b>6,480</b> |
| Tmem120a   | Rattus norvegicus transmembrane protein 120A (Tmem120a), mRNA [NM_001010945]                                          | <b>6,480</b> |
| Rora       | Rattus norvegicus RAR-related orphan receptor A (Rora), mRNA [NM_001106834]                                           | <b>6,480</b> |
| Otub1      | Rattus norvegicus OTU domain, ubiquitin aldehyde binding 1 (Otub1), mRNA [NM_001106332]                               | <b>6,480</b> |
| Id3        | Rattus norvegicus inhibitor of DNA binding 3 (Id3), mRNA [NM_013058]                                                  | <b>6,477</b> |
| 0          | Uncharacterized protein [Source:UniProtKB/TrEMBL;Acc:D3ZRA6] [ENSRNOT00000040629]                                     | <b>6,475</b> |
| 0          | Rattus norvegicus similar to 60S ribosomal protein L10 (QM protein homolog) (LOC366036), mRNA [XM_345350]             | <b>6,475</b> |
| LOC685003  | PREDICTED: Rattus norvegicus similar to Leydig cell tumor 10 kDa protein (LOC685003), mRNA [XM_001061861]             | <b>6,474</b> |
| Ttc9       | Rattus norvegicus tetratricopeptide repeat domain 9 (Ttc9), mRNA [NM_001134731]                                       | <b>6,474</b> |
| Zswim2     | Rattus norvegicus zinc finger, SWIM-type containing 2 (Zswim2), mRNA [NM_001011960]                                   | <b>6,473</b> |
| Pthr2      | Rattus norvegicus peptidyl-tRNA hydrolase 2 (Pthr2), nuclear gene encoding mitochondrial protein, mRNA [NM_001013860] | <b>6,473</b> |
| C5         | PREDICTED: Rattus norvegicus complement component 5 (C5), mRNA [XM_345342]                                            | <b>6,473</b> |
| Lta4h      | Rattus norvegicus leukotriene A4 hydrolase (Lta4h), mRNA [NM_001030031]                                               | <b>6,471</b> |
| Znf692     | Rattus norvegicus zinc finger protein 692 (Znf692), mRNA [NM_001126272]                                               | <b>6,470</b> |
| RGD1359616 | Rattus norvegicus similar to 2010321M09Rik protein (RGD1359616), mRNA [NM_001007663]                                  | <b>6,469</b> |
| Cpne8      | Rattus norvegicus copine VIII (Cpne8), mRNA [NM_001108750]                                                            | <b>6,468</b> |
| Tm9sf2     | Rattus norvegicus transmembrane 9 superfamily member 2 (Tm9sf2), mRNA [NM_001005554]                                  | <b>6,467</b> |
| Epm2aip1   | PREDICTED: Rattus norvegicus EPM2A (laforin) interacting protein 1 (Epm2aip1), mRNA [XM_236659]                       | <b>6,465</b> |
| LOC680531  | Rattus norvegicus similar to CG3880-PA (LOC680531), mRNA [NM_001109418]                                               | <b>6,465</b> |
| Cdk10      | Rattus norvegicus cyclin-dependent kinase 10 (Cdk10), transcript variant 3, mRNA [NM_001025722]                       | <b>6,464</b> |
| Zic5       | Rattus norvegicus Zic family member 5 (odd-paired homolog, Drosophila) (Zic5), mRNA [NM_001108391]                    | <b>6,464</b> |
| Rps27      | Rattus norvegicus ribosomal protein S27 (Rps27), mRNA [NM_053597]                                                     | <b>6,464</b> |
| Psm4       | Rattus norvegicus proteasome (prosome, macropain) subunit, alpha type 4 (Psm4), mRNA [NM_017281]                      | <b>6,463</b> |



|              |                                                                                                                     |       |
|--------------|---------------------------------------------------------------------------------------------------------------------|-------|
| Tmem30a      | Rattus norvegicus transmembrane protein 30A (Tmem30a), mRNA [NM_001004248]                                          | 6,462 |
| LOC100233177 | Rattus norvegicus hypothetical protein LOC100233177 (LOC100233177), mRNA [NM_001134531]                             | 6,462 |
| Msh2         | Rattus norvegicus mutS homolog 2 (E. coli) (Msh2), mRNA [NM_031058]                                                 | 6,459 |
| Rbm18        | Rattus norvegicus RNA binding motif protein 18 (Rbm18), mRNA [NM_001107838]                                         | 6,459 |
| Clcnkb       | Rattus norvegicus chloride channel Kb (Clcnkb), mRNA [NM_173103]                                                    | 6,458 |
| Prp15        | Rattus norvegicus proline-rich protein 15 (Prp15), mRNA [NM_012632]                                                 | 6,458 |
| Sh2d4a       | Rattus norvegicus SH2 domain containing 4A (Sh2d4a), mRNA [NM_001012048]                                            | 6,458 |
| 0            | Unknown                                                                                                             | 6,457 |
| LOC689963    | Rattus norvegicus hypothetical protein LOC689963 (LOC689963), mRNA [NM_001109560]                                   | 6,457 |
| Mrap         | Rattus norvegicus melanocortin 2 receptor accessory protein (Mrap), mRNA [NM_001135834]                             | 6,455 |
| Olr1536      | Rattus norvegicus olfactory receptor 1536 (Olr1536), mRNA [NM_001001353]                                            | 6,455 |
| 0            | Uncharacterized protein [Source:UniProtKB/TrEMBL;Acc:D3ZZG2] [ENSRNOT00000065209]                                   | 6,455 |
| 0            | Uncharacterized protein [Source:UniProtKB/TrEMBL;Acc:D3ZLK5] [ENSRNOT00000061377]                                   | 6,454 |
| 0            | Unknown                                                                                                             | 6,454 |
| MGC116197    | Rattus norvegicus similar to RIKEN cDNA 1700001E04 (MGC116197), mRNA [NM_001025755]                                 | 6,454 |
| Klhdc8a      | Rattus norvegicus kelch domain containing 8A (Klhdc8a), mRNA [NM_001100683]                                         | 6,453 |
| Uxs1         | Rattus norvegicus UDP-glucuronate decarboxylase 1 (Uxs1), mRNA [NM_139336]                                          | 6,453 |
| 0            | Unknown                                                                                                             | 6,453 |
| 0            | Unknown                                                                                                             | 6,453 |
| Adam4        | Rattus norvegicus a disintegrin and metalloprotease domain 4 (Adam4), mRNA [NM_020305]                              | 6,451 |
| 0            | NADH-ubiquinone oxidoreductase chain 1 [Source:UniProtKB/Swiss-Prot;Acc:P03889] [ENSRNOT00000047550]                | 6,450 |
| Pfkfb1       | Rattus norvegicus 6-phosphofructo-2-kinase/fructose-2,6-biphosphatase 1 (Pfkfb1), mRNA [NM_012621]                  | 6,450 |
| Mybl2        | Rattus norvegicus myeloblastosis oncogene-like 2 (Mybl2), mRNA [NM_001106536]                                       | 6,450 |
| Etv4         | Rattus norvegicus ets variant 4 (Etv4), mRNA [NM_001108299]                                                         | 6,449 |
| Aadacl1      | Rattus norvegicus arylacetamide deacetylase-like 1 (Aadacl1), mRNA [NM_001127524]                                   | 6,449 |
| 0            | Rattus norvegicus similar to RIKEN cDNA 4933431D05 (LOC301906), mRNA [XM_217507]                                    | 6,449 |
| 0            | Unknown                                                                                                             | 6,449 |
| Bcar1        | Rattus norvegicus breast cancer anti-estrogen resistance 1 (Bcar1), mRNA [NM_012931]                                | 6,449 |
| Unc119b      | Rattus norvegicus unc-119 homolog B (C. elegans) (Unc119b), mRNA [NM_001105934]                                     | 6,448 |
| Hcca2        | Rattus norvegicus HCCA2 protein (Hcca2), mRNA [NM_001109159]                                                        | 6,448 |
| Cry1         | Rattus norvegicus cryptochrome 1 (photolyase-like) (Cry1), mRNA [NM_198750]                                         | 6,447 |
| Pstpip2      | PREDICTED: Rattus norvegicus proline-serine-threonine phosphatase-interacting protein 2 (Pstpip2), mRNA [XM_225698] | 6,447 |
| 0            | Unknown                                                                                                             | 6,446 |
| Nob1         | Rattus norvegicus NIN1/RPN12 binding protein 1 homolog (S. cerevisiae) (Nob1), mRNA [NM_199086]                     | 6,446 |

|            |                                                                                                                                          |       |
|------------|------------------------------------------------------------------------------------------------------------------------------------------|-------|
| Itfg3      | Rattus norvegicus integrin alpha FG-GAP repeat containing 3 (Itfg3), mRNA [NM_001009701]                                                 | 6,446 |
| Pik3ca     | Rattus norvegicus phosphoinositide-3-kinase, catalytic, alpha polypeptide (Pik3ca), mRNA [NM_133399]                                     | 6,446 |
| Fbxo6      | Rattus norvegicus F-box protein 6 (Fbxo6), mRNA [NM_138917]                                                                              | 6,446 |
| Rbm5       | Rattus norvegicus RNA binding motif protein 5 (Rbm5), mRNA [NM_001100548]                                                                | 6,445 |
| 0          | Unknown                                                                                                                                  | 6,445 |
| 0          | Unknown                                                                                                                                  | 6,445 |
| Olr230     | Rattus norvegicus olfactory receptor 230 (Olr230), mRNA [NM_001000205]                                                                   | 6,444 |
| Morn5      | Rattus norvegicus MORN repeat containing 5 (Morn5), mRNA [NM_001047912]                                                                  | 6,444 |
| Hisppd2a   | Rattus norvegicus histidine acid phosphatase domain containing 2A (Hisppd2a), mRNA [NM_001080783]                                        | 6,443 |
| Mrs2       | Rattus norvegicus MRS2 magnesium homeostasis factor homolog (S. cerevisiae) (Mrs2), mRNA [NM_024001]                                     | 6,442 |
| 0          | Unknown                                                                                                                                  | 6,442 |
| Vps24      | Rattus norvegicus vacuolar protein sorting 24 homolog (S. cerevisiae) (Vps24), mRNA [NM_172331]                                          | 6,441 |
| RGD1563065 | PREDICTED: Rattus norvegicus similar to 3110047P20Rik protein (RGD1563065), mRNA [XM_001078520]                                          | 6,439 |
| Flad1      | Rattus norvegicus flavin adenine dinucleotide synthetase (Flad1), mRNA [NM_001110138]                                                    | 6,439 |
| Jakmip2    | Rattus norvegicus janus kinase and microtubule interacting protein 2 (Jakmip2), mRNA [NM_001107391]                                      | 6,438 |
| 0          | Unknown                                                                                                                                  | 6,438 |
| 0          | Unknown                                                                                                                                  | 6,437 |
| Clec4a3    | Rattus norvegicus C-type lectin domain family 4, member a3 (Clec4a3), mRNA [NM_001005891]                                                | 6,436 |
| Zfp382     | Rattus norvegicus zinc finger protein 382 (Zfp382), mRNA [NM_144749]                                                                     | 6,434 |
| Lrrc8c     | Rattus norvegicus leucine rich repeat containing 8 family, member C (Lrrc8c), mRNA [NM_001037179]                                        | 6,433 |
| 0          | set=Set beta isoform {alternatively spliced} [rats, neonatal kidney, mRNA, 2026 nt]. [S68987]                                            | 6,433 |
| B4galnt4   | Rattus norvegicus beta-1,4-N-acetyl-galactosaminyl transferase 4 (B4galnt4), mRNA [NM_001107562]                                         | 6,431 |
| Pigv       | Rattus norvegicus phosphatidylinositol glycan anchor biosynthesis, class V (Pigv), mRNA [NM_001010966]                                   | 6,430 |
| Lphn3      | Rattus norvegicus latrophilin 3 (Lphn3), mRNA [NM_130822]                                                                                | 6,430 |
| Prkag2     | Rattus norvegicus protein kinase, AMP-activated, gamma 2 non-catalytic subunit (Prkag2), mRNA [NM_184051]                                | 6,430 |
| Nmbr       | Rattus norvegicus neuromedin B receptor (Nmbr), mRNA [NM_012799]                                                                         | 6,430 |
| Olr892     | Rattus norvegicus olfactory receptor 892 (Olr892), mRNA [NM_001000060]                                                                   | 6,429 |
| Shprh      | Rattus norvegicus SNF2 histone linker PHD RING helicase (Shprh), mRNA [NM_001107470]                                                     | 6,429 |
| Trpc4      | Rattus norvegicus transient receptor potential cation channel, subfamily C, member 4 (Trpc4), transcript variant alpha, mRNA [NM_080396] | 6,429 |
| 0          | DRABAD11 Rat DRG Library Rattus norvegicus cDNA clone DRABAD11 5', mRNA sequence [BG664185]                                              | 6,429 |
| Copb2      | Rattus norvegicus coatamer protein complex, subunit beta 2 (beta prime) (Copb2), mRNA [NM_021765]                                        | 6,428 |
| 0          | Uncharacterized protein [Source:UniProtKB/TrEMBL;Acc:D3ZY49] [ENSRNOT00000001562]                                                        | 6,428 |
| Kcne4      | Rattus norvegicus potassium voltage-gated channel, Isk-related family, member 4 (Kcne4), mRNA [NM_212526]                                | 6,425 |
| Slc20a2    | Rattus norvegicus solute carrier family 20 (phosphate transporter), member 2 (Slc20a2), mRNA [NM_017223]                                 | 6,424 |

|              |                                                                                                                                 |       |
|--------------|---------------------------------------------------------------------------------------------------------------------------------|-------|
| Trim2        | Rattus norvegicus tripartite motif-containing 2 (Trim2), mRNA [NM_001108552]                                                    | 6,424 |
| Elovl7       | Rattus norvegicus ELOVL family member 7, elongation of long chain fatty acids (yeast) (Elovl7), mRNA [NM_001191844]             | 6,423 |
| Tmem177      | Rattus norvegicus transmembrane protein 177 (Tmem177), mRNA [NM_001037776]                                                      | 6,422 |
| Gas2l1       | Rattus norvegicus growth arrest-specific 2 like 1 (Gas2l1), mRNA [NM_001108365]                                                 | 6,422 |
| Sptlc1       | Rattus norvegicus serine palmitoyltransferase, long chain base subunit 1 (Sptlc1), mRNA [NM_001108406]                          | 6,422 |
| 0            | Unknown                                                                                                                         | 6,419 |
| Hn1l         | Rattus norvegicus hematological and neurological expressed 1-like (Hn1l), mRNA [NM_001013182]                                   | 6,418 |
| LOC681086    | RCG61899Uncharacterized protein [Source:UniProtKB/TrEMBL;Acc:D3ZZU7] [ENSRNOT00000020600]                                       | 6,417 |
| Fbxw4        | Rattus norvegicus F-box and WD repeat domain containing 4 (Fbxw4), mRNA [NM_001107600]                                          | 6,417 |
| 0            | Unknown                                                                                                                         | 6,414 |
| Kctd10       | Rattus norvegicus potassium channel tetramerization domain containing 10 (Kctd10), mRNA [NM_001009973]                          | 6,414 |
| LOC691241    | PREDICTED: Rattus norvegicus similar to MIC2 like 1 (LOC691241), mRNA [XM_001077347]                                            | 6,414 |
| LOC100125367 | Rattus norvegicus hypothetical protein LOC100125367 (LOC100125367), mRNA [NM_001103357]                                         | 6,414 |
| 0            | Unknown                                                                                                                         | 6,414 |
| Gabpa        | Rattus norvegicus GA binding protein transcription factor, alpha subunit (Gabpa), mRNA [NM_001108841]                           | 6,413 |
| 0            | Unknown                                                                                                                         | 6,410 |
| Stx2         | Rattus norvegicus syntaxin 2 (Stx2), mRNA [NM_012748]                                                                           | 6,410 |
| Serpina3n    | Rattus norvegicus serine (or cysteine) peptidase inhibitor, clade A, member 3N (Serpina3n), mRNA [NM_031531]                    | 6,409 |
| 0            | Unknown                                                                                                                         | 6,408 |
| 0            | Unknown                                                                                                                         | 6,408 |
| 0            | Unknown                                                                                                                         | 6,407 |
| Ttpal        | Rattus norvegicus tocopherol (alpha) transfer protein-like (Ttpal), mRNA [NM_001106537]                                         | 6,407 |
| Xpot         | Rattus norvegicus exportin, tRNA (nuclear export receptor for tRNAs) (Xpot), mRNA [NM_001108102]                                | 6,406 |
| Ube2k        | Rattus norvegicus ubiquitin-conjugating enzyme E2K (UBC1 homolog, yeast) (Ube2k), mRNA [NM_001106006]                           | 6,406 |
| Uros         | Rattus norvegicus uroporphyrinogen III synthase (Uros), mRNA [NM_001012068]                                                     | 6,406 |
| Eml5         | PREDICTED: Rattus norvegicus echinoderm microtubule associated protein like 5, transcript variant 2 (Eml5), mRNA [XM_001064078] | 6,405 |
| Hmox1        | Rattus norvegicus heme oxygenase (decycling) 1 (Hmox1), mRNA [NM_012580]                                                        | 6,405 |
| Plaur        | Rattus norvegicus plasminogen activator, urokinase receptor (Plaur), transcript variant 1, mRNA [NM_134352]                     | 6,404 |
| Limd1        | Rattus norvegicus LIM domains containing 1 (Limd1), mRNA [NM_001112737]                                                         | 6,404 |
| Gtpbp8       | Rattus norvegicus GTP-binding protein 8 (putative) (Gtpbp8), mRNA [NM_001025015]                                                | 6,403 |
| RGD1560888   | Rattus norvegicus similar to Cell division protein kinase 8 (Protein kinase K35) (RGD1560888), mRNA [NM_001109061]              | 6,403 |
| LOC688285    | PREDICTED: Rattus norvegicus hypothetical protein LOC688285 (LOC688285), mRNA [XM_001081744]                                    | 6,401 |
| Zdhhc20      | Rattus norvegicus zinc finger, DHHC-type containing 20 (Zdhhc20), mRNA [NM_001039336]                                           | 6,401 |
| 0            | Unknown                                                                                                                         | 6,399 |

|            |                                                                                                                                              |              |
|------------|----------------------------------------------------------------------------------------------------------------------------------------------|--------------|
| Gphn       | Rattus norvegicus gephyrin (Gphn), mRNA [NM_022865]                                                                                          | <b>6,399</b> |
| Gas2l1     | Rattus norvegicus growth arrest-specific 2 like 1 (Gas2l1), mRNA [NM_001108365]                                                              | <b>6,399</b> |
| Polr3k     | Rattus norvegicus polymerase (RNA) III (DNA directed) polypeptide K (Polr3k), mRNA [NM_001014259]                                            | <b>6,397</b> |
| Ccdc37     | Coiled-coil domain containing 37 (Predicted), isoform CRA_cUncharacterized protein [Source:UniProtKB/TrEMBL;Acc:D3ZEI2] [ENSRNOT00000024222] | <b>6,397</b> |
| 0          | Rattus norvegicus similar to RIKEN cDNA 4432405B04 (LOC360802), mRNA [XM_341074]                                                             | <b>6,397</b> |
| LOC691995  | Rattus norvegicus hypothetical protein LOC691995 (LOC691995), mRNA [NM_001103353]                                                            | <b>6,396</b> |
| 0          | Rattus norvegicus similar to RIKEN cDNA 4933431D05 (LOC363395), mRNA [XM_343725]                                                             | <b>6,396</b> |
| 0          | Unknown                                                                                                                                      | <b>6,395</b> |
| 0          | Unknown                                                                                                                                      | <b>6,395</b> |
| Arid4b     | Rattus norvegicus AT rich interactive domain 4B (Rbp1 like) (Arid4b), mRNA [NM_053421]                                                       | <b>6,395</b> |
| Ftl        | Rattus norvegicus ferritin, light polypeptide (Ftl), mRNA [NM_022500]                                                                        | <b>6,395</b> |
| RGD1562378 | PREDICTED: Rattus norvegicus histone H4 variant H4-v.1 (RGD1562378), mRNA [XM_575704]                                                        | <b>6,394</b> |
| Shmt1      | Rattus norvegicus serine hydroxymethyltransferase 1 (soluble) (Shmt1), nuclear gene encoding mitochondrial protein, mRNA [NM_001047842]      | <b>6,394</b> |
| Zfp202     | Rattus norvegicus zinc finger protein 202 (Zfp202), mRNA [NM_001109290]                                                                      | <b>6,393</b> |
| Gns        | Rattus norvegicus glucosamine (N-acetyl)-6-sulfatase (Gns), mRNA [NM_001011989]                                                              | <b>6,393</b> |
| 0          | Unknown                                                                                                                                      | <b>6,393</b> |
| Scnn1b     | Rattus norvegicus sodium channel, nonvoltage-gated 1, beta (Scnn1b), mRNA [NM_012648]                                                        | <b>6,393</b> |
| LOC499806  | Rattus norvegicus similar to RIKEN cDNA 4933404M02 (LOC499806), mRNA [NM_001024311]                                                          | <b>6,392</b> |
| 0          | Unknown                                                                                                                                      | <b>6,392</b> |
| Fcer1g     | Rattus norvegicus Fc fragment of IgE, high affinity I, receptor for; gamma polypeptide (Fcer1g), mRNA [NM_001131001]                         | <b>6,388</b> |
| Slc26a9    | Rattus norvegicus solute carrier family 26, member 9 (Slc26a9), mRNA [NM_001107172]                                                          | <b>6,388</b> |
| 0          | Unknown                                                                                                                                      | <b>6,388</b> |
| Rnaseh2b   | Rattus norvegicus ribonuclease H2, subunit B (Rnaseh2b), mRNA [NM_001007007]                                                                 | <b>6,388</b> |
| 0          | Unknown                                                                                                                                      | <b>6,387</b> |
| Rrp1       | Rattus norvegicus ribosomal RNA processing 1 homolog (S. cerevisiae) (Rrp1), mRNA [NM_001012073]                                             | <b>6,387</b> |
| Kank3      | Rattus norvegicus KN motif and ankyrin repeat domains 3 (Kank3), mRNA [NM_001108989]                                                         | <b>6,386</b> |
| Opn4       | Rattus norvegicus opsin 4 (Opn4), mRNA [NM_138860]                                                                                           | <b>6,384</b> |
| 0          | PREDICTED: Rattus norvegicus similar to high mobility group nucleosomal binding domain 1 (LOC691642), mRNA [XM_001079135]                    | <b>6,384</b> |
| Niacr1     | Rattus norvegicus niacin receptor 1 (Niacr1), mRNA [NM_181476]                                                                               | <b>6,384</b> |
| Agl        | Rattus norvegicus amylo-1,6-glucosidase, 4-alpha-glucanotransferase (Agl), mRNA [NM_001108564]                                               | <b>6,382</b> |
| RGD1307254 | Rattus norvegicus similar to RIKEN cDNA 1200011118 (RGD1307254), mRNA [NM_001024875]                                                         | <b>6,381</b> |
| Pdss2      | Rattus norvegicus prenyl (decaprenyl) diphosphate synthase, subunit 2 (Pdss2), mRNA [NM_001014249]                                           | <b>6,380</b> |
| 0          | Unknown                                                                                                                                      | <b>6,379</b> |

|            |                                                                                                                                                                                                   |       |
|------------|---------------------------------------------------------------------------------------------------------------------------------------------------------------------------------------------------|-------|
| Ccnc       | Rattus norvegicus cyclin C (Ccnc), mRNA [NM_001100472]                                                                                                                                            | 6,378 |
| 0          | Unknown                                                                                                                                                                                           | 6,376 |
| Osmr       | Rattus norvegicus oncostatin M receptor (Osmr), mRNA [NM_001005384]                                                                                                                               | 6,375 |
| Coro2a     | Rattus norvegicus coronin, actin binding protein 2A (Coro2a), mRNA [NM_001012101]                                                                                                                 | 6,375 |
| RGD1308775 | Rattus norvegicus similar to RIKEN cDNA 4921536K21 (RGD1308775), mRNA [NM_001107233]                                                                                                              | 6,375 |
| Znf512     | Uncharacterized protein [Source:UniProtKB/TrEMBL;Acc:D3ZIF0] [ENSRNOT00000006658]                                                                                                                 | 6,371 |
| Ptn        | Rattus norvegicus pleiotrophin (Ptn), mRNA [NM_017066]                                                                                                                                            | 6,371 |
| Ppwd1      | Rattus norvegicus peptidylprolyl isomerase domain and WD repeat containing 1 (Ppwd1), mRNA [NM_001106406]                                                                                         | 6,370 |
| Zbtb43     | Rattus norvegicus zinc finger and BTB domain containing 43 (Zbtb43), mRNA [NM_001012094]                                                                                                          | 6,370 |
| Tns1       | Rattus norvegicus tensin 1 (Tns1), mRNA [NM_001191810]                                                                                                                                            | 6,370 |
| 0          | Unknown                                                                                                                                                                                           | 6,369 |
| 0          | Unknown                                                                                                                                                                                           | 6,369 |
| Zswim5     | Rattus norvegicus zinc finger, SWIM domain containing 5 (Zswim5), mRNA [NM_001107963]                                                                                                             | 6,369 |
| RGD1565012 | PREDICTED: Rattus norvegicus similar to beta-1,3-N-acetylglucosaminyltransferase bGnT-5 (RGD1565012), mRNA [XM_231163]                                                                            | 6,368 |
| Hbs1l      | Rattus norvegicus Hbs1-like (S. cerevisiae) (Hbs1l), mRNA [NM_001011934]                                                                                                                          | 6,368 |
| 0          | Unknown                                                                                                                                                                                           | 6,367 |
| Orai1      | Rattus norvegicus ORAI calcium release-activated calcium modulator 1 (Orai1), mRNA [NM_001013982]                                                                                                 | 6,367 |
| Phlda3     | Rattus norvegicus pleckstrin homology-like domain, family A, member 3 (Phlda3), mRNA [NM_001012206]                                                                                               | 6,364 |
| Ddx51      | Rattus norvegicus DEAD (Asp-Glu-Ala-Asp) box polypeptide 51 (Ddx51), mRNA [NM_001107150]                                                                                                          | 6,363 |
| Nub1       | Rattus norvegicus negative regulator of ubiquitin-like proteins 1 (Nub1), mRNA [NM_001013925]                                                                                                     | 6,363 |
| N4bp2      | Uncharacterized protein [Source:UniProtKB/TrEMBL;Acc:D3ZLS6] [ENSRNOT000000031792]                                                                                                                | 6,363 |
| 0          | B double prime 1, subunit of RNA polymerase III transcription initiation factor IIIB (Predicted), isoform CRA_aUncharacterized protein [Source:UniProtKB/TrEMBL;Acc:D3ZDI4] [ENSRNOT000000024023] | 6,361 |
| Zfp280d    | Rattus norvegicus zinc finger protein 280D (Zfp280d), mRNA [NM_001108165]                                                                                                                         | 6,361 |
| Upf2       | Rattus norvegicus UPF2 regulator of nonsense transcripts homolog (yeast) (Upf2), mRNA [NM_001108421]                                                                                              | 6,361 |
| RGD1566149 | Rattus norvegicus similar to CDNA sequence BC017647 (RGD1566149), mRNA [NM_001109038]                                                                                                             | 6,360 |
| 0          | Rattus norvegicus, 30 clones, strain BN/SsNHsdMCW RNOR03322613, whole genome shotgun sequence [AABR03128500]                                                                                      | 6,360 |
| Map4k5     | Rattus norvegicus mitogen-activated protein kinase kinase kinase 5 (Map4k5), mRNA [NM_001192016]                                                                                                  | 6,360 |
| Adarb1     | Rattus norvegicus adenosine deaminase, RNA-specific, B1 (Adarb1), transcript variant 1, mRNA [NM_012894]                                                                                          | 6,359 |
| Stard3nl   | Rattus norvegicus STARD3 N-terminal like (Stard3nl), mRNA [NM_001008298]                                                                                                                          | 6,358 |
| 0          | Q6P9S9_MOUSE (Q6P9S9) Zinc finger, ZZ domain containing 3, partial (20%) [TC642834]                                                                                                               | 6,357 |
| 0          | Rattus norvegicus similar to glyceraldehyde-3-phosphate dehydrogenase (LOC313741), mRNA [XM_233699]                                                                                               | 6,357 |
| LOC499124  | Rattus norvegicus mouse zinc finger protein 14-like (LOC499124), mRNA [NM_001100991]                                                                                                              | 6,357 |
| 0          | Unknown                                                                                                                                                                                           | 6,355 |

|            |                                                                                                                                                            |              |
|------------|------------------------------------------------------------------------------------------------------------------------------------------------------------|--------------|
| Slc35a2    | Rattus norvegicus solute carrier family 35 (UDP-galactose transporter), member A2 (Slc35a2), mRNA [NM_001127642]                                           | <b>6,354</b> |
| Engase     | Rattus norvegicus endo-beta-N-acetylglucosaminidase (Engase), mRNA [NM_001107070]                                                                          | <b>6,353</b> |
| Abi3       | Rattus norvegicus ABI family, member 3 (Abi3), mRNA [NM_001013118]                                                                                         | <b>6,352</b> |
| Traf3ip3   | Rattus norvegicus TRAF3 interacting protein 3 (Traf3ip3), mRNA [NM_001014132]                                                                              | <b>6,352</b> |
| Hmgb1      | Rattus norvegicus high mobility group box 1 (Hmgb1), mRNA [NM_012963]                                                                                      | <b>6,352</b> |
| Wbscr28    | Uncharacterized protein [Source:UniProtKB/TrEMBL;Acc:D3ZKV0] [ENSRNOT00000033499]                                                                          | <b>6,352</b> |
| Arfip1     | Rattus norvegicus ADP-ribosylation factor interacting protein 1 (Arfip1), mRNA [NM_021763]                                                                 | <b>6,351</b> |
| Tuba1b     | Rattus norvegicus tubulin, alpha 1B (Tuba1b), mRNA [NM_001044270]                                                                                          | <b>6,349</b> |
| LOC317456  | Rattus norvegicus hypothetical LOC317456 (LOC317456), mRNA [NM_001047894]                                                                                  | <b>6,349</b> |
| Sln        | Rattus norvegicus sarcolipin (Sln), mRNA [NM_001013247]                                                                                                    | <b>6,346</b> |
| Tigd3      | Rattus norvegicus tigger transposable element derived 3 (Tigd3), mRNA [NM_001107573]                                                                       | <b>6,346</b> |
| Slc6a2     | Rattus norvegicus solute carrier family 6 (neurotransmitter transporter, noradrenalin), member 2 (Slc6a2), mRNA [NM_031343]                                | <b>6,346</b> |
| Snrk       | Rattus norvegicus SNF related kinase (Snrk), mRNA [NM_138833]                                                                                              | <b>6,345</b> |
| 0          | Unknown                                                                                                                                                    | <b>6,345</b> |
| Hnrnpab    | Rattus norvegicus heterogeneous nuclear ribonucleoprotein A/B (Hnrnpab), mRNA [NM_031330]                                                                  | <b>6,345</b> |
| Pxmp2      | Rattus norvegicus peroxisomal membrane protein 2 (Pxmp2), mRNA [NM_031587]                                                                                 | <b>6,344</b> |
| Olr1547    | Rattus norvegicus olfactory receptor 1547 (Olr1547), mRNA [NM_001001107]                                                                                   | <b>6,343</b> |
| Rpl30      | Rattus norvegicus ribosomal protein L30 (Rpl30), mRNA [NM_022699]                                                                                          | <b>6,343</b> |
| LOC501110  | Rattus norvegicus similar to Glutathione S-transferase A1 (GTH1) (HA subunit 1) (GST-epsilon) (GSTA1-1) (GST class-alpha) (LOC501110), mRNA [NM_001024361] | <b>6,343</b> |
| Mks1       | Rattus norvegicus Meckel syndrome, type 1 (Mks1), mRNA [NM_001034917]                                                                                      | <b>6,343</b> |
| Gtf2h2     | Rattus norvegicus general transcription factor IIH, polypeptide 2 (Gtf2h2), mRNA [NM_001077428]                                                            | <b>6,341</b> |
| Rpe        | Rattus norvegicus ribulose-5-phosphate-3-epimerase (Rpe), mRNA [NM_001033903]                                                                              | <b>6,341</b> |
| Klhl36     | Rattus norvegicus kelch-like 36 (Drosophila) (Klhl36), mRNA [NM_001017511]                                                                                 | <b>6,340</b> |
| Wdr6       | Rattus norvegicus WD repeat domain 6 (Wdr6), mRNA [NM_001006988]                                                                                           | <b>6,340</b> |
| Fam89a     | Rattus norvegicus family with sequence similarity 89, member A (Fam89a), mRNA [NM_001011711]                                                               | <b>6,339</b> |
| Lyzl6      | Rattus norvegicus lysozyme-like 6 (Lyzl6), mRNA [NM_001135833]                                                                                             | <b>6,339</b> |
| Gda        | Rattus norvegicus guanine deaminase (Gda), mRNA [NM_031776]                                                                                                | <b>6,339</b> |
| Brwd2      | PREDICTED: Rattus norvegicus bromodomain and WD repeat domain containing 2 (Brwd2), mRNA [XM_219377]                                                       | <b>6,339</b> |
| Fbxo3      | Rattus norvegicus F-box protein 3 (Fbxo3), mRNA [NM_001109606]                                                                                             | <b>6,339</b> |
| Grm3       | Rattus norvegicus glutamate receptor, metabotropic 3 (Grm3), mRNA [NM_001105712]                                                                           | <b>6,338</b> |
| Best2      | Rattus norvegicus bestrophin 2 (Best2), mRNA [NM_001108895]                                                                                                | <b>6,338</b> |
| LOC685634  | PREDICTED: Rattus norvegicus hypothetical protein LOC685634 (LOC685634), mRNA [XM_001064606]                                                               | <b>6,337</b> |
| RGD1559884 | Rattus norvegicus similar to RIKEN cDNA 9930023K05 (RGD1559884), mRNA [NM_001134613]                                                                       | <b>6,335</b> |

|              |                                                                                                                                         |              |
|--------------|-----------------------------------------------------------------------------------------------------------------------------------------|--------------|
| Tf           | Rattus norvegicus transferrin (Tf), mRNA [NM_001013110]                                                                                 | <b>6,334</b> |
| Ttc39b       | Rattus norvegicus tetratricopeptide repeat domain 39B (Ttc39b), mRNA [NM_001106665]                                                     | <b>6,333</b> |
| 0            | Histone H4Osteogenic growth peptide [Source:UniProtKB/Swiss-Prot;Acc:P62804] [ENSRNOT00000068510]                                       | <b>6,332</b> |
| Ccbl1        | Rattus norvegicus cysteine conjugate-beta lyase, cytoplasmic (Ccbl1), mRNA [NM_001013164]                                               | <b>6,332</b> |
| 0            | Rattus norvegicus similar to ribosomal protein S27a (LOC291599), mRNA [XM_225950]                                                       | <b>6,330</b> |
| Camsap111    | Rattus norvegicus calmodulin regulated spectrin-associated protein 1-like 1 (Camsap111), mRNA [NM_001134503]                            | <b>6,330</b> |
| lqcg         | Rattus norvegicus IQ motif containing G (lqcg), mRNA [NM_001014230]                                                                     | <b>6,330</b> |
| Hmgb2        | Rattus norvegicus high mobility group box 2 (Hmgb2), mRNA [NM_017187]                                                                   | <b>6,329</b> |
| 0            | Unknown                                                                                                                                 | <b>6,328</b> |
| Plxdc1       | Rattus norvegicus plexin domain containing 1 (Plxdc1), mRNA [NM_001107046]                                                              | <b>6,328</b> |
| Slc3a2       | Rattus norvegicus solute carrier family 3 (activators of dibasic and neutral amino acid transport), member 2 (Slc3a2), mRNA [NM_019283] | <b>6,327</b> |
| Olr361       | Rattus norvegicus olfactory receptor 361 (Olr361), mRNA [NM_001000556]                                                                  | <b>6,327</b> |
| Tcf25        | Uncharacterized protein [Source:UniProtKB/TrEMBL;Acc:D3ZC46] [ENSRNOT00000046155]                                                       | <b>6,326</b> |
| LOC100361840 | PREDICTED: Rattus norvegicus LIM homeobox transcription factor 1, beta-like (LOC100361840), mRNA [XM_002742444]                         | <b>6,326</b> |
| 0            | Unknown                                                                                                                                 | <b>6,326</b> |
| Car12        | Rattus norvegicus carbonic anyhydrase 12 (Car12), mRNA [NM_001080756]                                                                   | <b>6,326</b> |
| RGD1563073   | PREDICTED: Rattus norvegicus similar to SIGLEC-like 1 (RGD1563073), mRNA [XM_002725572]                                                 | <b>6,326</b> |
| LOC100363621 | PREDICTED: Rattus norvegicus ecto-NOX disulfide-thiol exchanger 1 (LOC100363621), mRNA [XM_002725125]                                   | <b>6,325</b> |
| Ets2         | Rattus norvegicus v-ets erythroblastosis virus E26 oncogene homolog 2 (avian) (Ets2), mRNA [NM_001107107]                               | <b>6,325</b> |
| RGD1311186   | Rattus norvegicus similar to RIKEN cDNA 1810014F10 gene (RGD1311186), mRNA [NM_001106310]                                               | <b>6,324</b> |
| 0            | Unknown                                                                                                                                 | <b>6,324</b> |
| Srcrb4d      | Uncharacterized protein [Source:UniProtKB/TrEMBL;Acc:D3ZQH3] [ENSRNOT00000001953]                                                       | <b>6,323</b> |
| Slc7a6       | Rattus norvegicus solute carrier family 7 (cationic amino acid transporter, y+ system), member 6 (Slc7a6), mRNA [NM_001107424]          | <b>6,323</b> |
| 0            | Nebulin (Predicted)Uncharacterized protein [Source:UniProtKB/TrEMBL;Acc:D3ZM87] [ENSRNOT00000038926]                                    | <b>6,322</b> |
| Pus10        | pseudouridylate synthase 10 [Source:RefSeq peptide;Acc:NP_001020449] [ENSRNOT00000008115]                                               | <b>6,322</b> |
| Pml          | PREDICTED: Rattus norvegicus promyelocytic leukemia (Pml), mRNA [XM_236296]                                                             | <b>6,322</b> |
| LOC684139    | PREDICTED: Rattus norvegicus similar to zinc finger protein 582 (LOC684139), mRNA [XM_001069100]                                        | <b>6,320</b> |
| LOC686298    | PREDICTED: Rattus norvegicus similar to protein phosphatase 2C eta isoform 2 (LOC686298), mRNA [XM_001073372]                           | <b>6,320</b> |
| 0            | Unknown                                                                                                                                 | <b>6,319</b> |
| RGD1304624   | Rattus norvegicus similar to RIKEN cDNA 2700097O09 (RGD1304624), mRNA [NM_001108022]                                                    | <b>6,319</b> |
| Ctsc         | Rattus norvegicus cathepsin C (Ctsc), mRNA [NM_017097]                                                                                  | <b>6,319</b> |
| Kbtbd2       | Rattus norvegicus kelch repeat and BTB (POZ) domain containing 2 (Kbtbd2), mRNA [NM_001107861]                                          | <b>6,319</b> |
| Xrcc5        | Rattus norvegicus X-ray repair complementing defective repair in Chinese hamster cells 5 (Xrcc5), mRNA [NM_177419]                      | <b>6,318</b> |
| Tnnc2        | Rattus norvegicus troponin C type 2 (fast) (Tnnc2), mRNA [NM_001037351]                                                                 | <b>6,317</b> |

|            |                                                                                                                                  |              |
|------------|----------------------------------------------------------------------------------------------------------------------------------|--------------|
| Psd        | Rattus norvegicus pleckstrin and Sec7 domain containing (Psd), mRNA [NM_134370]                                                  | <b>6,316</b> |
| Asphd2     | Rattus norvegicus aspartate beta-hydroxylase domain containing 2 (Asphd2), mRNA [NM_001009716]                                   | <b>6,316</b> |
| Atcay      | Rattus norvegicus ataxia, cerebellar, Cayman type (Atcay), mRNA [NM_001040190]                                                   | <b>6,316</b> |
| 0          | Uncharacterized protein [Source:UniProtKB/TrEMBL;Acc:D3ZW42] [ENSRNOT00000065829]                                                | <b>6,316</b> |
| B3galnt1   | Rattus norvegicus beta-1,3-N-acetylgalactosaminyltransferase 1 (B3galnt1), mRNA [NM_001013158]                                   | <b>6,315</b> |
| 0          | Unknown                                                                                                                          | <b>6,315</b> |
| Pkm2       | Rattus norvegicus pyruvate kinase, muscle (Pkm2), mRNA [NM_053297]                                                               | <b>6,314</b> |
| Uckl1      | Rattus norvegicus uridine-cytidine kinase 1-like 1 (Uckl1), mRNA [NM_001109212]                                                  | <b>6,313</b> |
| 0          | Uncharacterized protein [Source:UniProtKB/TrEMBL;Acc:D3Z8C0] [ENSRNOT00000042031]                                                | <b>6,313</b> |
| Dusp10     | Rattus norvegicus dual specificity phosphatase 10 (Dusp10), mRNA [NM_001105734]                                                  | <b>6,311</b> |
| Parp3      | Rattus norvegicus poly (ADP-ribose) polymerase family, member 3 (Parp3), mRNA [NM_001008328]                                     | <b>6,311</b> |
| Psm3       | Rattus norvegicus proteasome (prosome, macropain) 26S subunit, non-ATPase, 3 (Psm3), mRNA [NM_001008281]                         | <b>6,311</b> |
| Taf8       | Rattus norvegicus TAF8 RNA polymerase II, TATA box binding protein (TBP)-associated factor (Taf8), mRNA [NM_001108197]           | <b>6,309</b> |
| 0          | Unknown                                                                                                                          | <b>6,308</b> |
| Tbx18      | Rattus norvegicus T-box18 (Tbx18), mRNA [NM_001108173]                                                                           | <b>6,308</b> |
| Ppm1a      | Rattus norvegicus protein phosphatase 1A, magnesium dependent, alpha isoform (Ppm1a), mRNA [NM_017038]                           | <b>6,307</b> |
| Arrdc5     | Rattus norvegicus arrestin domain containing 5 (Arrdc5), mRNA [NM_001109408]                                                     | <b>6,307</b> |
| Cdk7       | Cell division protein kinase 7 [Source:UniProtKB/Swiss-Prot;Acc:P51952] [ENSRNOT00000025026]                                     | <b>6,307</b> |
| Bcl2l1     | Rattus norvegicus Bcl2-like 1 (Bcl2l1), nuclear gene encoding mitochondrial protein, transcript variant 1, mRNA [NM_001033672]   | <b>6,306</b> |
| Pik3cb     | Rattus norvegicus phosphoinositide-3-kinase, catalytic, beta polypeptide (Pik3cb), mRNA [NM_053481]                              | <b>6,306</b> |
| Dnm1l      | Rattus norvegicus dynamin 1-like (Dnm1l), mRNA [NM_053655]                                                                       | <b>6,302</b> |
| Wdr25l     | Rattus norvegicus WD repeat domain 25-like (Wdr25l), mRNA [NM_001135894]                                                         | <b>6,301</b> |
| Sarnp      | Rattus norvegicus SAP domain containing ribonucleoprotein (Sarnp), mRNA [NM_001033070]                                           | <b>6,301</b> |
| Tbc1d5     | Rattus norvegicus TBC1 domain family, member 5 (Tbc1d5), mRNA [NM_001134762]                                                     | <b>6,301</b> |
| Acap1      | Rattus norvegicus ArfGAP with coiled-coil, ankyrin repeat and PH domains 1 (Acap1), mRNA [NM_001105796]                          | <b>6,301</b> |
| Nin        | Rattus norvegicus ninein (GSK3B interacting protein) (Nin), mRNA [NM_001106737]                                                  | <b>6,298</b> |
| 0          | Rattus norvegicus similar to Hypothetical protein LOC216150 (LOC365006), mRNA [XM_344770]                                        | <b>6,297</b> |
| 0          | Unknown                                                                                                                          | <b>6,297</b> |
| Sfrs14     | Rattus norvegicus splicing factor, arginine/serine-rich 14 (Sfrs14), mRNA [NM_001108397]                                         | <b>6,296</b> |
| Prima1     | Rattus norvegicus proline rich membrane anchor 1 (Prima1), mRNA [NM_001108721]                                                   | <b>6,295</b> |
| RGD1304879 | Rattus norvegicus similar to Zinc finger protein 398 (Zinc finger DNA binding protein p52/p71) (RGD1304879), mRNA [NM_001014056] | <b>6,295</b> |
| 0          | Unknown                                                                                                                          | <b>6,295</b> |
| Rpia       | Rattus norvegicus ribose 5-phosphate isomerase A (Rpia), mRNA [NM_001108632]                                                     | <b>6,294</b> |
| Ttk        | Rattus norvegicus Ttk protein kinase (Ttk), mRNA [NM_001108172]                                                                  | <b>6,294</b> |



|            |                                                                                                                                                                                             |              |
|------------|---------------------------------------------------------------------------------------------------------------------------------------------------------------------------------------------|--------------|
| Zbtb9      | Rattus norvegicus zinc finger and BTB domain containing 9 (Zbtb9), mRNA [NM_213564]                                                                                                         | <b>6,293</b> |
| 0          | Unknown                                                                                                                                                                                     | <b>6,293</b> |
| RGD1311406 | PREDICTED: Rattus norvegicus similar to RIKEN cDNA B430306N03 gene (RGD1311406), mRNA [XM_001063911]                                                                                        | <b>6,293</b> |
| 0          | Unknown                                                                                                                                                                                     | <b>6,293</b> |
| Ddr1       | Rattus norvegicus discoidin domain receptor tyrosine kinase 1 (Ddr1), transcript variant 1, mRNA [NM_013137]                                                                                | <b>6,293</b> |
| Rassf7     | Rattus norvegicus Ras association (RalGDS/AF-6) domain family (N-terminal) member 7 (Rassf7), mRNA [NM_001106317]                                                                           | <b>6,292</b> |
| 0          | Q3U348_MOUSE (Q3U348) NOD-derived CD11c +ve dendritic cells cDNA, RIKEN full-length enriched library, clone:F630112C03 product:Rap2 interacting protein x homolog, partial (31%) [TC632655] | <b>6,292</b> |
| Il17rd     | Rattus norvegicus interleukin 17 receptor D (Il17rd), mRNA [NM_001191937]                                                                                                                   | <b>6,292</b> |
| Duox2      | Rattus norvegicus dual oxidase 2 (Duox2), mRNA [NM_024141]                                                                                                                                  | <b>6,291</b> |
| Smarca1    | Rattus norvegicus SWI/SNF related, matrix associated, actin dependent regulator of chromatin, subfamily e, member 1 (Smarca1), mRNA [NM_001024993]                                          | <b>6,291</b> |
| LOC500625  | Rattus norvegicus hypothetical protein LOC500625 (LOC500625), mRNA [NM_001025151]                                                                                                           | <b>6,291</b> |
| Rnf34      | Rattus norvegicus ring finger protein 34 (Rnf34), mRNA [NM_001004075]                                                                                                                       | <b>6,291</b> |
| Tril       | Rattus norvegicus TLR4 interactor with leucine-rich repeats (Tril), mRNA [NM_001034010]                                                                                                     | <b>6,290</b> |
| Nsmce1     | Rattus norvegicus non-SMC element 1 homolog (S. cerevisiae) (Nsmce1), mRNA [NM_001039611]                                                                                                   | <b>6,289</b> |
| Tshr       | Rattus norvegicus thyroid stimulating hormone receptor (Tshr), mRNA [NM_012888]                                                                                                             | <b>6,288</b> |
| LOC679229  | PREDICTED: Rattus norvegicus similar to zinc finger protein 397, transcript variant 2 (LOC679229), mRNA [XM_001055142]                                                                      | <b>6,287</b> |
| Klhl9      | Rattus norvegicus kelch-like 9 (Drosophila) (Klhl9), mRNA [NM_001107944]                                                                                                                    | <b>6,287</b> |
| Frem2      | Uncharacterized protein [Source:UniProtKB/TrEMBL;Acc:D3ZG74] [ENSRNOT00000031487]                                                                                                           | <b>6,287</b> |
| Atg10      | Rattus norvegicus autophagy-related 10 (S. cerevisiae) (Atg10), mRNA [NM_001109505]                                                                                                         | <b>6,286</b> |
| Itgad      | Rattus norvegicus integrin, alpha D (Itgad), mRNA [NM_031691]                                                                                                                               | <b>6,286</b> |
| Rsph10b    | Rattus norvegicus radial spoke head 10 homolog B (Chlamydomonas) (Rsph10b), mRNA [NM_001013867]                                                                                             | <b>6,286</b> |
| Fas        | Rattus norvegicus Fas (TNF receptor superfamily, member 6) (Fas), mRNA [NM_139194]                                                                                                          | <b>6,285</b> |
| 0          | PREDICTED: Rattus norvegicus maltase-glucoamylase (Mgam), mRNA [XM_231714]                                                                                                                  | <b>6,285</b> |
| LOC679861  | AGENCOURT_114819228 NIH_MGC_433 Rattus norvegicus cDNA clone IMAGE:9098661 5', mRNA sequence [EV777635]                                                                                     | <b>6,285</b> |
| 0          | GAPR1_MOUSE (Q9CYL5) Golgi-associated plant pathogenesis-related protein 1 (Golgi-associated PR-1 protein) (GAPR-1) (Glioma pathogenesis-related protein 2) (GliPR 2), complete [TC625589]  | <b>6,284</b> |
| Gfra2      | Rattus norvegicus GDNF family receptor alpha 2 (Gfra2), mRNA [NM_012750]                                                                                                                    | <b>6,284</b> |
| LOC685106  | PREDICTED: Rattus norvegicus similar to ribosomal protein L6 (LOC685106), mRNA [XM_001062312]                                                                                               | <b>6,282</b> |
| Mrpl51     | Rattus norvegicus mitochondrial ribosomal protein L51 (Mrpl51), nuclear gene encoding mitochondrial protein, mRNA [NM_001106621]                                                            | <b>6,280</b> |
| Prmt8      | PREDICTED: Rattus norvegicus similar to Protein arginine N-methyltransferase 4 (Heterogeneous nuclear ribonucleoprotein methyltransferase-like protein 4) (LOC688502), mRNA [XM_002726433]  | <b>6,280</b> |
| Asb11      | Rattus norvegicus ankyrin repeat and SOCS box-containing 11 (Asb11), mRNA [NM_001106962]                                                                                                    | <b>6,280</b> |

|            |                                                                                                                                                    |              |
|------------|----------------------------------------------------------------------------------------------------------------------------------------------------|--------------|
| 0          | Ryanodine receptor type 3 [Source:UniProtKB/TrEMBL;Acc:Q9R273] [ENSRNOT00000049582]                                                                | <b>6,279</b> |
| Thap3      | Rattus norvegicus THAP domain containing, apoptosis associated protein 3 (Thap3), mRNA [NM_001108695]                                              | <b>6,279</b> |
| Lage3      | Rattus norvegicus L antigen family, member 3 (Lage3), mRNA [NM_001106345]                                                                          | <b>6,277</b> |
| RGD1564325 | 40S ribosomal protein S24 [Source:UniProtKB/TrEMBL;Acc:D3ZFZ8] [ENSRNOT00000047252]                                                                | <b>6,277</b> |
| Slco2b1    | Rattus norvegicus solute carrier organic anion transporter family, member 2b1 (Slco2b1), mRNA [NM_080786]                                          | <b>6,276</b> |
| 0          | Unknown                                                                                                                                            | <b>6,276</b> |
| 0          | Unknown                                                                                                                                            | <b>6,275</b> |
| Spdef      | Rattus norvegicus SAM pointed domain containing ets transcription factor (Spdef), mRNA [NM_001109530]                                              | <b>6,275</b> |
| St13       | Rattus norvegicus suppression of tumorigenicity 13 (St13), mRNA [NM_031122]                                                                        | <b>6,275</b> |
| Ecg2       | Rattus norvegicus esophagus cancer-related protein 2 (Ecg2), mRNA [NM_001002816]                                                                   | <b>6,274</b> |
| Btla       | Rattus norvegicus B and T lymphocyte associated (Btla), mRNA [NM_213630]                                                                           | <b>6,274</b> |
| RGD1309808 | Rattus norvegicus similar to apolipoprotein L2; apolipoprotein L-II (RGD1309808), mRNA [NM_001134801]                                              | <b>6,274</b> |
| Smarca1    | Rattus norvegicus SWI/SNF related, matrix associated, actin dependent regulator of chromatin, subfamily b, member 1 (Smarca1), mRNA [NM_001025728] | <b>6,274</b> |
| Fam198b    | Rattus norvegicus family with sequence similarity 198, member B (Fam198b), mRNA [NM_199105]                                                        | <b>6,273</b> |
| 0          | Q4FAC5_VIBAL (Q4FAC5) Collagenase, partial (3%) [TC596950]                                                                                         | <b>6,272</b> |
| Olr1083    | Rattus norvegicus olfactory receptor 1083 (Olr1083), mRNA [NM_001000710]                                                                           | <b>6,272</b> |
| RGD1561795 | Rattus norvegicus similar to RIKEN cDNA 1700012B09 (RGD1561795), mRNA [NM_001109289]                                                               | <b>6,272</b> |
| Gja3       | Rattus norvegicus gap junction protein, alpha 3 (Gja3), mRNA [NM_024376]                                                                           | <b>6,272</b> |
| Pigp       | Rattus norvegicus phosphatidylinositol glycan anchor biosynthesis, class P (Pigp), mRNA [NM_001099758]                                             | <b>6,272</b> |
| Cnga1      | Rattus norvegicus cyclic nucleotide gated channel alpha 1 (Cnga1), mRNA [NM_053497]                                                                | <b>6,271</b> |
| Ddx47      | Rattus norvegicus DEAD (Asp-Glu-Ala-Asp) box polypeptide 47 (Ddx47), mRNA [NM_001015005]                                                           | <b>6,271</b> |
| 0          | Rattus norvegicus TL0AEA64YE20 mRNA sequence. [FQ232826]                                                                                           | <b>6,270</b> |
| Obox5      | Uncharacterized protein [Source:UniProtKB/TrEMBL;Acc:D3ZYG1] [ENSRNOT00000045660]                                                                  | <b>6,269</b> |
| Mtmr15     | Rattus norvegicus myotubularin related protein 15 (Mtmr15), mRNA [NM_001191633]                                                                    | <b>6,269</b> |
| 0          | Rattus norvegicus, 23 clones, strain BN/SsNHsdMCW RNOR03327657, whole genome shotgun sequence [AABR03128419]                                       | <b>6,269</b> |
| 0          | Unknown                                                                                                                                            | <b>6,267</b> |
| Saa4       | Rattus norvegicus serum amyloid A4, constitutive (Saa4), mRNA [NM_001009478]                                                                       | <b>6,267</b> |
| Parn       | PREDICTED: Rattus norvegicus poly(A)-specific ribonuclease (deadenylation nuclease) (Parn), mRNA [XM_001075629]                                    | <b>6,265</b> |
| Ccdc32     | Rattus norvegicus coiled-coil domain containing 32 (Ccdc32), mRNA [NM_001024245]                                                                   | <b>6,265</b> |
| Uck1       | Rattus norvegicus uridine-cytidine kinase 1 (Uck1), mRNA [NM_001107831]                                                                            | <b>6,264</b> |
| 0          | Unknown                                                                                                                                            | <b>6,263</b> |
| Vapb       | Rattus norvegicus VAMP (vesicle-associated membrane protein)-associated protein B and C (Vapb), mRNA [NM_021847]                                   | <b>6,262</b> |
| 0          | Unknown                                                                                                                                            | <b>6,262</b> |

|            |                                                                                                                                  |       |
|------------|----------------------------------------------------------------------------------------------------------------------------------|-------|
| Trim2      | Rattus norvegicus tripartite motif-containing 2 (Trim2), mRNA [NM_001108552]                                                     | 6,262 |
| Rtn4       | Rattus norvegicus reticulon 4 (Rtn4), mRNA [NM_031831]                                                                           | 6,262 |
| 0          | Unknown                                                                                                                          | 6,262 |
| 0          | Uncharacterized protein [Source:UniProtKB/TrEMBL;Acc:D4AD38] [ENSRNOT00000036164]                                                | 6,261 |
| LOC681740  | PREDICTED: Rattus norvegicus similar to jumonji protein, transcript variant 4 (LOC681740), mRNA [XM_001056897]                   | 6,259 |
| 0          | Unknown                                                                                                                          | 6,258 |
| Rnf111     | Rattus norvegicus ring finger protein 111 (Rnf111), mRNA [NM_001106836]                                                          | 6,258 |
| 0          | PREDICTED: Rattus norvegicus similar to high mobility group nucleosomal binding domain 1 (LOC680964), mRNA [XM_001059675]        | 6,258 |
| Shc2       | Rattus norvegicus SHC (Src homology 2 domain containing) transforming protein 2 (Shc2), mRNA [NM_001108065]                      | 6,257 |
| Isca1      | Rattus norvegicus iron-sulfur cluster assembly 1 homolog (S. cerevisiae) (Isca1), mRNA [NM_181626]                               | 6,257 |
| LOC681152  | PREDICTED: Rattus norvegicus similar to cytoplasmic beta-actin (LOC681152), mRNA [XM_001060515]                                  | 6,256 |
| Galr2      | Rattus norvegicus galanin receptor 2 (Galr2), mRNA [NM_019172]                                                                   | 6,256 |
| Mrps11     | Rattus norvegicus mitochondrial ribosomal protein S11 (Mrps11), nuclear gene encoding mitochondrial protein, mRNA [NM_001109148] | 6,256 |
| RGD1561796 | Uncharacterized protein [Source:UniProtKB/TrEMBL;Acc:D3ZS66] [ENSRNOT00000068577]                                                | 6,256 |
| Tbcd       | PREDICTED: Rattus norvegicus tubulin-specific chaperone d (Tbcd), partial mRNA [XM_340955]                                       | 6,256 |
| 0          | Unknown                                                                                                                          | 6,255 |
| Magi3      | Rattus norvegicus membrane associated guanylate kinase, WW and PDZ domain containing 3 (Magi3), mRNA [NM_139084]                 | 6,255 |
| Olr1435    | Rattus norvegicus olfactory receptor 1435 (Olr1435), mRNA [NM_001000777]                                                         | 6,255 |
| Lonrf3     | Rattus norvegicus LON peptidase N-terminal domain and ring finger 3 (Lonrf3), mRNA [NM_001191585]                                | 6,254 |
| Krtap19-3  | PREDICTED: Rattus norvegicus keratin associated protein 19-3 (Krtap19-3), mRNA [XM_001063382]                                    | 6,253 |
| Mettl9     | Rattus norvegicus methyltransferase like 9 (Mettl9), mRNA [NM_001163164]                                                         | 6,252 |
| Echdc1     | Rattus norvegicus enoyl Coenzyme A hydratase domain containing 1 (Echdc1), mRNA [NM_001007734]                                   | 6,250 |
| 0          | Unknown                                                                                                                          | 6,250 |
| 0          | Unknown                                                                                                                          | 6,249 |
| 0          | Uncharacterized protein [Source:UniProtKB/TrEMBL;Acc:D3ZDB2] [ENSRNOT00000068478]                                                | 6,248 |
| 0          | Unknown                                                                                                                          | 6,248 |
| Capn2      | Rattus norvegicus calpain 2 (Capn2), mRNA [NM_017116]                                                                            | 6,248 |
| Spats2l    | Rattus norvegicus spermatogenesis associated, serine-rich 2-like (Spats2l), mRNA [NM_001014102]                                  | 6,248 |
| Bat4       | Rattus norvegicus HLA-B associated transcript 4 (Bat4), mRNA [NM_001034157]                                                      | 6,247 |
| Ccdc33     | Rattus norvegicus coiled-coil domain containing 33 (Ccdc33), mRNA [NM_001014091]                                                 | 6,247 |
| Rbms1      | Rattus norvegicus RNA binding motif, single stranded interacting protein 1 (Rbms1), mRNA [NM_001012184]                          | 6,247 |
| Mfsd6      | Rattus norvegicus major facilitator superfamily domain containing 6 (Mfsd6), mRNA [NM_001106911]                                 | 6,246 |
| Inpp5a     | Rattus norvegicus inositol polyphosphate-5-phosphatase A (Inpp5a), mRNA [NM_001108923]                                           | 6,246 |
| 0          | Unknown                                                                                                                          | 6,246 |

|            |                                                                                                                                                                  |       |
|------------|------------------------------------------------------------------------------------------------------------------------------------------------------------------|-------|
| Prok1      | Rattus norvegicus prokineticin 1 (Prok1), mRNA [NM_138851]                                                                                                       | 6,243 |
| Cflar      | Rattus norvegicus CASP8 and FADD-like apoptosis regulator, mRNA (cDNA clone MGC:108616 IMAGE:7376876), complete cds. [BC089781]                                  | 6,243 |
| Ror1       | Rattus norvegicus receptor tyrosine kinase-like orphan receptor 1 (Ror1), mRNA [NM_001108671]                                                                    | 6,242 |
| 0          | Uncharacterized protein [Source:UniProtKB/TrEMBL;Acc:D3ZG39] [ENSRNOT00000058806]                                                                                | 6,241 |
| Ppp1cc     | Rattus norvegicus protein phosphatase 1, catalytic subunit, gamma isoform (Ppp1cc), mRNA [NM_022498]                                                             | 6,241 |
| 0          | Unknown                                                                                                                                                          | 6,240 |
| 0          | Unknown                                                                                                                                                          | 6,240 |
| RGD1306058 | Rattus norvegicus similar to RIKEN cDNA 1110007C09 (RGD1306058), mRNA [NM_001134572]                                                                             | 6,240 |
| LOC684745  | PREDICTED: Rattus norvegicus similar to germinal histone H4 gene (LOC684745), mRNA [XM_001071818]                                                                | 6,239 |
| Ndufaf4    | Rattus norvegicus NADH dehydrogenase (ubiquinone) 1 alpha subcomplex, assembly factor 4 (Ndufaf4), nuclear gene encoding mitochondrial protein, mRNA [NM_198783] | 6,239 |
| Pcnx12     | Uncharacterized protein [Source:UniProtKB/TrEMBL;Acc:D4AB99] [ENSRNOT00000030077]                                                                                | 6,238 |
| Dip2c      | Rattus norvegicus DIP2 disco-interacting protein 2 homolog C (Drosophila) (Dip2c), mRNA [NM_001107360]                                                           | 6,238 |
| 0          | RGD1565425 protein [Source:UniProtKB/TrEMBL;Acc:B0BMZ8] [ENSRNOT00000065777]                                                                                     | 6,238 |
| Hs3st3a1   | Rattus norvegicus heparan sulfate (glucosamine) 3-O-sulfotransferase 3A1 (Hs3st3a1), mRNA [NM_001172067]                                                         | 6,238 |
| Plac1l     | PREDICTED: Rattus norvegicus placenta-specific 1-like (Plac1l), mRNA [XM_001076035]                                                                              | 6,237 |
| Rbm24      | Rattus norvegicus RNA binding motif protein 24 (Rbm24), mRNA [NM_001191100]                                                                                      | 6,237 |
| RGD1304931 | Rattus norvegicus similar to RIKEN cDNA 2310042D19 (RGD1304931), mRNA [NM_001108001]                                                                             | 6,236 |
| 0          | Unknown                                                                                                                                                          | 6,235 |
| Rtp1       | Rattus norvegicus receptor (chemosensory) transporter protein 1 (Rtp1), mRNA [NM_001105870]                                                                      | 6,233 |
| 0          | Uncharacterized protein [Source:UniProtKB/TrEMBL;Acc:D3ZSP3] [ENSRNOT00000068004]                                                                                | 6,232 |
| Hspb1      | Rattus norvegicus heat shock protein 1 (Hspb1), mRNA [NM_031970]                                                                                                 | 6,231 |
| RGD1308261 | Rattus norvegicus similar to RIKEN cDNA 1190005P17 (RGD1308261), mRNA [NM_001134464]                                                                             | 6,229 |
| RGD1563863 | Rattus norvegicus similar to expressed sequence AI553587 (RGD1563863), mRNA [NM_001127559]                                                                       | 6,228 |
| 0          | Unknown                                                                                                                                                          | 6,227 |
| Scg2       | Rattus norvegicus secretogranin II (chromogranin C) (Scg2), mRNA [NM_022669]                                                                                     | 6,227 |
| Cabp1      | Rattus norvegicus calcium binding protein 1 (Cabp1), transcript variant 3, mRNA [NM_001033676]                                                                   | 6,225 |
| LOC292449  | PREDICTED: Rattus norvegicus similar to hypothetical protein (LOC292449), miscRNA [XR_085688]                                                                    | 6,225 |
| 0          | Unknown                                                                                                                                                          | 6,225 |
| Fbn2       | Rattus norvegicus fibrillin 2 (Fbn2), mRNA [NM_031826]                                                                                                           | 6,224 |
| Rhebl1     | Rattus norvegicus Ras homolog enriched in brain like 1 (Rhebl1), mRNA [NM_182825]                                                                                | 6,224 |
| Gpatc2     | Rattus norvegicus G patch domain containing 2 (Gpatc2), mRNA [NM_001011909]                                                                                      | 6,224 |
| Gmfg       | Rattus norvegicus glia maturation factor, gamma (Gmfg), mRNA [NM_181091]                                                                                         | 6,224 |
| RGD1563979 | PREDICTED: Rattus norvegicus similar to over-expressed breast tumor protein (RGD1563979), mRNA [XM_001064610]                                                    | 6,223 |

|              |                                                                                                                                                           |              |
|--------------|-----------------------------------------------------------------------------------------------------------------------------------------------------------|--------------|
| Dll1         | Rattus norvegicus delta-like 1 (Drosophila) (Dll1), mRNA [NM_032063]                                                                                      | <b>6,223</b> |
| Ankrd12      | Rattus norvegicus ankyrin repeat domain 12 (Ankrd12), mRNA [NM_001108238]                                                                                 | <b>6,223</b> |
| Rp1          | Rattus norvegicus retinitis pigmentosa 1 (human) (Rp1), mRNA [NM_001195676]                                                                               | <b>6,223</b> |
| Gramd1a      | Rattus norvegicus GRAM domain containing 1A (Gramd1a), mRNA [NM_001014160]                                                                                | <b>6,222</b> |
| 0            | Homeobox protein cut-like 1 [Source:UniProtKB/Swiss-Prot;Acc:P53565] [ENSRNOT00000044841]                                                                 | <b>6,222</b> |
| Znf483       | Rattus norvegicus zinc finger protein 483 (Znf483), mRNA [NM_133422]                                                                                      | <b>6,222</b> |
| Rnf138       | Rattus norvegicus ring finger protein 138 (Rnf138), mRNA [NM_053588]                                                                                      | <b>6,221</b> |
| Dusp4        | Rattus norvegicus dual specificity phosphatase 4 (Dusp4), mRNA [NM_022199]                                                                                | <b>6,218</b> |
| 0            | Unknown                                                                                                                                                   | <b>6,218</b> |
| LOC100366132 | PREDICTED: Rattus norvegicus Glyceraldehyde-3-phosphate dehydrogenase-like (LOC100366132), mRNA [XM_002726560]                                            | <b>6,217</b> |
| RGD1563667   | Rattus norvegicus similar to TDPOZ3 (RGD1563667), mRNA [NM_001100985]                                                                                     | <b>6,216</b> |
| Zscan18      | Uncharacterized protein [Source:UniProtKB/TrEMBL;Acc:D3ZCL4] [ENSRNOT00000036880]                                                                         | <b>6,216</b> |
| 0            | Unknown                                                                                                                                                   | <b>6,216</b> |
| LOC681140    | PREDICTED: Rattus norvegicus similar to 14-3-3 protein theta (14-3-3 protein tau) (14-3-3 protein T-cell) (HS1 protein) (LOC681140), mRNA [XM_001060456]  | <b>6,216</b> |
| Arpp21       | Rattus norvegicus cAMP-regulated phosphoprotein 21 (Arpp21), transcript variant 2, mRNA [NM_001135045]                                                    | <b>6,215</b> |
| 0            | Unknown                                                                                                                                                   | <b>6,215</b> |
| LOC684681    | PREDICTED: Rattus norvegicus similar to Histone H1.2 (H1 VAR.1) (H1c) (LOC684681), mRNA [XM_001071565]                                                    | <b>6,214</b> |
| 0            | Rattus norvegicus TL0ADA12YN23 mRNA sequence. [FQ223309]                                                                                                  | <b>6,214</b> |
| Bicd2        | Rattus norvegicus bicaudal D homolog 2 (Drosophila) (Bicd2), transcript variant 1, mRNA [NM_001033674]                                                    | <b>6,214</b> |
| 0            | Unknown                                                                                                                                                   | <b>6,213</b> |
| mrpl11       | Rattus norvegicus mitochondrial ribosomal protein L11 (mrpl11), nuclear gene encoding mitochondrial protein, mRNA [NM_001006973]                          | <b>6,213</b> |
| Cxadr        | Rattus norvegicus coxsackie virus and adenovirus receptor (Cxadr), mRNA [NM_053570]                                                                       | <b>6,212</b> |
| Ndufab1      | Rattus norvegicus NADH dehydrogenase (ubiquinone) 1, alpha/beta subcomplex, 1 (Ndufab1), nuclear gene encoding mitochondrial protein, mRNA [NM_001106294] | <b>6,210</b> |
| 0            | Vesicle transport through interaction with t-SNAREs homolog 1B [Source:UniProtKB/Swiss-Prot;Acc:P58200] [ENSRNOT00000015814]                              | <b>6,210</b> |
| Pnn          | Rattus norvegicus pinin, desmosome associated protein (Pnn), mRNA [NM_001109023]                                                                          | <b>6,209</b> |
| Mcc          | Rattus norvegicus mutated in colorectal cancers (Mcc), mRNA [NM_001170534]                                                                                | <b>6,208</b> |
| Chrdl1       | Rattus norvegicus kohjirin (Chrdl1), mRNA [NM_199502]                                                                                                     | <b>6,207</b> |
| Lrmp         | PREDICTED: Rattus norvegicus lymphoid-restricted membrane protein (Lrmp), mRNA [XM_001074768]                                                             | <b>6,206</b> |
| 0            | Uncharacterized protein [Source:UniProtKB/TrEMBL;Acc:D4A273] [ENSRNOT00000007422]                                                                         | <b>6,205</b> |
| RGD1566369   | 40S ribosomal protein S8 [Source:UniProtKB/TrEMBL;Acc:D3ZIE1] [ENSRNOT00000006662]                                                                        | <b>6,205</b> |
| Plcg1        | Rattus norvegicus phospholipase C, gamma 1 (Plcg1), mRNA [NM_013187]                                                                                      | <b>6,205</b> |
| 0            | LOC499746 protein [Source:UniProtKB/TrEMBL;Acc:Q498T7] [ENSRNOT00000062007]                                                                               | <b>6,205</b> |

|            |                                                                                                                                                                                                       |              |
|------------|-------------------------------------------------------------------------------------------------------------------------------------------------------------------------------------------------------|--------------|
| 0          | Unknown                                                                                                                                                                                               | <b>6,204</b> |
| Dmbx1      | Rattus norvegicus diencephalon/mesencephalon homeobox 1 (Dmbx1), mRNA [NM_001107961]                                                                                                                  | <b>6,204</b> |
| Ccdc152    | Rattus norvegicus coiled-coil domain containing 152 (Ccdc152), mRNA [NM_001191959]                                                                                                                    | <b>6,204</b> |
| RGD1559999 | PREDICTED: Rattus norvegicus similar to DNA segment, Chr 5, ERATO Doi 577, expressed (RGD1559999), mRNA [XM_001069829]                                                                                | <b>6,204</b> |
| Exosc9     | Rattus norvegicus exosome component 9 (Exosc9), mRNA [NM_001025406]                                                                                                                                   | <b>6,203</b> |
| Akap13     | Rattus norvegicus A kinase (PRKA) anchor protein 13 (Akap13), mRNA [NM_001106271]                                                                                                                     | <b>6,203</b> |
| Arse       | Rattus norvegicus arylsulfatase E (chondrodysplasia punctata 1) (Arse), mRNA [NM_001047885]                                                                                                           | <b>6,202</b> |
| Cript      | Rattus norvegicus cysteine-rich PDZ-binding protein (Cript), mRNA [NM_019907]                                                                                                                         | <b>6,202</b> |
| LOC691725  | PREDICTED: Rattus norvegicus similar to Nucleolar RNA helicase 2 (Nucleolar RNA helicase II) (Nucleolar RNA helicase Gu) (RH II/Gu) (Gu-alpha) (DEAD box protein 21) (LOC691725), miscRNA [XR_086290] | <b>6,202</b> |
| 0          | Unknown                                                                                                                                                                                               | <b>6,202</b> |
| Supt7l     | Rattus norvegicus suppressor of Ty 7 ( <i>S. cerevisiae</i> )-like (Supt7l), mRNA [NM_001108010]                                                                                                      | <b>6,201</b> |
| RGD1304827 | Rattus norvegicus hypothetical LOC316091 (RGD1304827), mRNA [NM_001009437]                                                                                                                            | <b>6,201</b> |
| LOC688916  | PREDICTED: Rattus norvegicus hypothetical protein LOC688916 (LOC688916), mRNA [XM_001068819]                                                                                                          | <b>6,200</b> |
| LOC689725  | Uncharacterized protein [Source:UniProtKB/TrEMBL;Acc:D3ZCW3] [ENSRNOT00000037765]                                                                                                                     | <b>6,198</b> |
| LOC680097  | PREDICTED: Rattus norvegicus similar to germinal histone H4 gene (LOC680097), mRNA [XM_001055696]                                                                                                     | <b>6,198</b> |
| 0          | Uncharacterized protein [Source:UniProtKB/TrEMBL;Acc:D3ZQ99] [ENSRNOT00000046318]                                                                                                                     | <b>6,197</b> |
| Fzd2       | Rattus norvegicus frizzled homolog 2 ( <i>Drosophila</i> ) (Fzd2), mRNA [NM_172035]                                                                                                                   | <b>6,196</b> |
| Ddrk1      | Rattus norvegicus DDRGK domain containing 1 (Ddrk1), mRNA [NM_001106512]                                                                                                                              | <b>6,196</b> |
| Lactb2     | Rattus norvegicus lactamase, beta 2 (Lactb2), mRNA [NM_001024247]                                                                                                                                     | <b>6,196</b> |
| Cul5       | Rattus norvegicus cullin 5 (Cul5), mRNA [NM_022683]                                                                                                                                                   | <b>6,194</b> |
| Slu7       | Rattus norvegicus SLU7 splicing factor homolog ( <i>S. cerevisiae</i> ) (Slu7), mRNA [NM_001100550]                                                                                                   | <b>6,194</b> |
| Myeov2     | Rattus norvegicus myeloma overexpressed 2 (Myeov2), mRNA [NM_001109044]                                                                                                                               | <b>6,194</b> |
| Ddr2       | Rattus norvegicus discoidin domain receptor tyrosine kinase 2 (Ddr2), mRNA [NM_031764]                                                                                                                | <b>6,193</b> |
| Zfp3       | Rattus norvegicus zinc finger protein 3 (Zfp3), mRNA [NM_001109034]                                                                                                                                   | <b>6,192</b> |
| Fadd       | Rattus norvegicus Fas (TNFRSF6)-associated via death domain (Fadd), mRNA [NM_152937]                                                                                                                  | <b>6,192</b> |
| 0          | Uncharacterized protein [Source:UniProtKB/TrEMBL;Acc:D3ZRI2] [ENSRNOT00000012282]                                                                                                                     | <b>6,192</b> |
| Pitpnm2    | Rattus norvegicus phosphatidylinositol transfer protein, membrane-associated 2 (Pitpnm2), mRNA [NM_001107139]                                                                                         | <b>6,191</b> |
| Tgm4       | Rattus norvegicus transglutaminase 4 (prostate) (Tgm4), mRNA [NM_022713]                                                                                                                              | <b>6,191</b> |
| Actg1      | Rattus norvegicus actin, gamma 1 (Actg1), mRNA [NM_001127449]                                                                                                                                         | <b>6,190</b> |
| Myo10      | Rattus norvegicus myosin X (Myo10), mRNA [NM_001107657]                                                                                                                                               | <b>6,189</b> |
| Usp35      | PREDICTED: Rattus norvegicus ubiquitin specific peptidase 35 (Usp35), mRNA [XM_001064027]                                                                                                             | <b>6,189</b> |
| 0          | Uncharacterized protein [Source:UniProtKB/TrEMBL;Acc:D3ZHI0] [ENSRNOT00000061428]                                                                                                                     | <b>6,186</b> |
| RGD1309350 | Rattus norvegicus similar to transthyretin (4L369) (RGD1309350), mRNA [NM_001134507]                                                                                                                  | <b>6,184</b> |

|            |                                                                                                                    |       |
|------------|--------------------------------------------------------------------------------------------------------------------|-------|
| Tmem27     | Rattus norvegicus transmembrane protein 27 (Tmem27), mRNA [NM_020976]                                              | 6,184 |
| Fam108a1   | Rattus norvegicus family with sequence similarity 108, member A1 (Fam108a1), mRNA [NM_001006983]                   | 6,183 |
| Pold3      | Rattus norvegicus polymerase (DNA-directed), delta 3, accessory subunit (Pold3), mRNA [NM_001024750]               | 6,182 |
| 0          | Unknown                                                                                                            | 6,181 |
| RGD1563613 | Uncharacterized protein [Source:UniProtKB/TrEMBL;Acc:D4AE10] [ENSRNOT00000044779]                                  | 6,181 |
| Zfp335     | Uncharacterized protein [Source:UniProtKB/TrEMBL;Acc:D3ZXD5] [ENSRNOT00000023521]                                  | 6,180 |
| Unc13c     | Rattus norvegicus unc-13 homolog C (C. elegans) (Unc13c), mRNA [NM_173146]                                         | 6,180 |
| 0          | Unknown                                                                                                            | 6,178 |
| Casp2      | Rattus norvegicus caspase 2 (Casp2), mRNA [NM_022522]                                                              | 6,178 |
| LOC682138  | PREDICTED: Rattus norvegicus similar to DEAD (Asp-Glu-Ala-Asp) box polypeptide 43 (LOC682138), mRNA [XM_001060057] | 6,177 |
| Rem2       | Rattus norvegicus RAS (RAD and GEM) like GTP binding 2 (Rem2), mRNA [NM_022685]                                    | 6,177 |
| RGD1562612 | PREDICTED: Rattus norvegicus similar to RIKEN cDNA 1110003E01 (RGD1562612), mRNA [XM_577381]                       | 6,176 |
| Rabepk     | Rattus norvegicus Rab9 effector protein with kelch motifs (Rabepk), mRNA [NM_001024871]                            | 6,175 |
| Ppm1b      | Rattus norvegicus protein phosphatase 1B, magnesium dependent, beta isoform (Ppm1b), mRNA [NM_033096]              | 6,175 |
| 0          | Unknown                                                                                                            | 6,175 |
| Abcb4      | Rattus norvegicus ATP-binding cassette, subfamily B (MDR/TAP), member 4 (Abcb4), mRNA [NM_012690]                  | 6,175 |
| Wwc1       | PREDICTED: Rattus norvegicus WW and C2 domain containing 1, transcript variant 2 (Wwc1), mRNA [XM_002724669]       | 6,173 |
| Fam49a     | Rattus norvegicus family with sequence similarity 49, member A (Fam49a), mRNA [NM_001106718]                       | 6,173 |
| 0          | Uncharacterized protein [Source:UniProtKB/TrEMBL;Acc:D3ZUC5] [ENSRNOT00000046312]                                  | 6,173 |
| Alas1      | Rattus norvegicus aminolevulinate, delta-, synthase 1 (Alas1), mRNA [NM_024484]                                    | 6,171 |
| Gon4l      | Rattus norvegicus gon-4-like (C. elegans) (Gon4l), mRNA [NM_001024797]                                             | 6,171 |
| Zbtb20     | Rattus norvegicus zinc finger and BTB domain containing 20 (Zbtb20), mRNA [NM_001105880]                           | 6,170 |
| Traf7      | Rattus norvegicus Tnf receptor-associated factor 7 (Traf7), mRNA [NM_001127548]                                    | 6,170 |
| RGD1566036 | Rattus norvegicus similar to RIKEN cDNA 2310008H04 (RGD1566036), mRNA [NM_001100988]                               | 6,168 |
| Mtor       | Rattus norvegicus mechanistic target of rapamycin (serine/threonine kinase) (Mtor), mRNA [NM_019906]               | 6,168 |
| Dbx2       | Homeodomain protein Dbx2 [Source:UniProtKB/TrEMBL;Acc:Q5DWV0] [ENSRNOT00000009143]                                 | 6,167 |
| Prmt5      | Rattus norvegicus protein arginine methyltransferase 5 (Prmt5), mRNA [NM_001108867]                                | 6,167 |
| N6amt1     | Rattus norvegicus N-6 adenine-specific DNA methyltransferase 1 (putative) (N6amt1), mRNA [NM_001191592]            | 6,166 |
| Vip        | Rattus norvegicus vasoactive intestinal peptide (Vip), mRNA [NM_053991]                                            | 6,165 |
| Zbtb39     | Rattus norvegicus zinc finger and BTB domain containing 39 (Zbtb39), mRNA [NM_001130537]                           | 6,165 |
| 0          | Unknown                                                                                                            | 6,164 |
| Rab9a      | Rattus norvegicus RAB9A, member RAS oncogene family (Rab9a), mRNA [NM_053458]                                      | 6,163 |
| 0          | Unknown                                                                                                            | 6,163 |
| Haus3      | Rattus norvegicus HAUS augmin-like complex, subunit 3 (Haus3), mRNA [NM_001109412]                                 | 6,160 |

|            |                                                                                                                                                                         |              |
|------------|-------------------------------------------------------------------------------------------------------------------------------------------------------------------------|--------------|
| Slc40a1    | Rattus norvegicus solute carrier family 39 (iron-regulated transporter), member 1 (Slc40a1), mRNA [NM_133315]                                                           | <b>6,160</b> |
| Abcb1b     | Rattus norvegicus ATP-binding cassette, subfamily B (MDR/TAP), member 1B (Abcb1b), mRNA [NM_012623]                                                                     | <b>6,159</b> |
| Atp5i      | Rattus norvegicus ATP synthase, H <sup>+</sup> transporting, mitochondrial F0 complex, subunit E (Atp5i), nuclear gene encoding mitochondrial protein, mRNA [NM_080481] | <b>6,159</b> |
| 0          | PREDICTED: Rattus norvegicus 40S ribosomal protein SA-like (LOC100365517), mRNA [XM_002726683]                                                                          | <b>6,158</b> |
| Bcap29     | Rattus norvegicus B-cell receptor-associated protein 29 (Bcap29), mRNA [NM_001006980]                                                                                   | <b>6,158</b> |
| Aacs       | Rattus norvegicus acetoacetyl-CoA synthetase (Aacs), mRNA [NM_023104]                                                                                                   | <b>6,158</b> |
| Kcnab1     | Rattus norvegicus potassium voltage-gated channel, shaker-related subfamily, beta member 1 (Kcnab1), mRNA [NM_017303]                                                   | <b>6,158</b> |
| Glr2       | Rattus norvegicus glycine receptor, alpha 2 (Glr2), mRNA [NM_012568]                                                                                                    | <b>6,155</b> |
| Map7d1     | Rattus norvegicus MAP7 domain containing 1 (Map7d1), mRNA [NM_001109438]                                                                                                | <b>6,155</b> |
| Slc12a7    | Rattus norvegicus solute carrier family 12 (potassium/chloride transporters), member 7 (Slc12a7), mRNA [NM_001013144]                                                   | <b>6,154</b> |
| LOC684623  | Uncharacterized protein [Source:UniProtKB/TrEMBL;Acc:D3ZKJ1] [ENSRNOT00000003659]                                                                                       | <b>6,154</b> |
| Slc35e4    | Rattus norvegicus solute carrier family 35, member E4 (Slc35e4), mRNA [NM_153316]                                                                                       | <b>6,154</b> |
| Nkx6-3     | Rattus norvegicus NK6 homeobox 3 (Nkx6-3), mRNA [NM_001109455]                                                                                                          | <b>6,154</b> |
| 0          | Unknown                                                                                                                                                                 | <b>6,153</b> |
| Tmem194b   | Rattus norvegicus transmembrane protein 194B (Tmem194b), mRNA [NM_001134642]                                                                                            | <b>6,153</b> |
| Mapk13     | Rattus norvegicus mitogen activated protein kinase 13 (Mapk13), mRNA [NM_019231]                                                                                        | <b>6,153</b> |
| RGD1310861 | Rattus norvegicus similar to RIKEN cDNA 1500011H22 (RGD1310861), mRNA [NM_001008290]                                                                                    | <b>6,153</b> |
| Cd97       | Rattus norvegicus CD97 molecule (Cd97), mRNA [NM_001012164]                                                                                                             | <b>6,152</b> |
| Rgnef      | Rattus norvegicus Rho-guanine nucleotide exchange factor (Rgnef), mRNA [NM_001108542]                                                                                   | <b>6,151</b> |
| Crif3      | Rattus norvegicus unknown mRNA sequence. [AF072835]                                                                                                                     | <b>6,151</b> |
| Elavl2     | Rattus norvegicus ELAV (embryonic lethal, abnormal vision, Drosophila)-like 2 (Hu antigen B) (Elavl2), mRNA [NM_173309]                                                 | <b>6,149</b> |
| 0          | Unknown                                                                                                                                                                 | <b>6,148</b> |
| Cyp2a1     | Rattus norvegicus cytochrome P450, family 2, subfamily a, polypeptide 1 (Cyp2a1), mRNA [NM_012692]                                                                      | <b>6,148</b> |
| Dner       | PREDICTED: Rattus norvegicus delta/notch-like EGF repeat containing (Dner), mRNA [XM_001064351]                                                                         | <b>6,147</b> |
| Ngfrap1    | Rattus norvegicus nerve growth factor receptor (TNFRSF16) associated protein 1 (Ngfrap1), mRNA [NM_053401]                                                              | <b>6,147</b> |
| 0          | Unknown                                                                                                                                                                 | <b>6,146</b> |
| Nif3l1     | Rattus norvegicus NIF3 NGG1 interacting factor 3-like 1 (S. pombe) (Nif3l1), mRNA [NM_001024763]                                                                        | <b>6,146</b> |
| Olr13      | Rattus norvegicus olfactory receptor 13 (Olr13), mRNA [NM_001000116]                                                                                                    | <b>6,146</b> |
| Rpl24      | Rattus norvegicus ribosomal protein L24 (Rpl24), mRNA [NM_022515]                                                                                                       | <b>6,144</b> |
| LOC679934  | Rattus norvegicus similar to chromosome 3 open reading frame 10 (LOC679934), mRNA [NM_001195476]                                                                        | <b>6,143</b> |
| 0          | Unknown                                                                                                                                                                 | <b>6,143</b> |
| Kcnj14     | Rattus norvegicus potassium inwardly-rectifying channel, subfamily J, member 14 (Kcnj14), mRNA [NM_170718]                                                              | <b>6,143</b> |
| 0          | Unknown                                                                                                                                                                 | <b>6,142</b> |



|              |                                                                                                                                      |       |
|--------------|--------------------------------------------------------------------------------------------------------------------------------------|-------|
| Skp2         | Rattus norvegicus S-phase kinase-associated protein 2 (p45) (Skp2), mRNA [NM_001106416]                                              | 6,142 |
| Atp6v0d1     | Rattus norvegicus ATPase, H <sup>+</sup> transporting, lysosomal V0 subunit D1 (Atp6v0d1), mRNA [NM_001011927]                       | 6,141 |
| LOC679824    | PREDICTED: Rattus norvegicus hypothetical protein LOC679824 (LOC679824), miscRNA [XR_085739]                                         | 6,141 |
| LOC683410    | PREDICTED: Rattus norvegicus similar to ankyrin repeat domain 33, transcript variant 2 (LOC683410), mRNA [XM_002726976]              | 6,140 |
| Irf1         | Rattus norvegicus interferon regulatory factor 1 (Irf1), mRNA [NM_012591]                                                            | 6,140 |
| Tle1         | Rattus norvegicus transducin-like enhancer of split 1 (E(sp1) homolog, Drosophila) (Tle1), mRNA [NM_001173433]                       | 6,139 |
| Ccdc88b      | Rattus norvegicus coiled-coil domain containing 88B (Ccdc88b), mRNA [NM_001108517]                                                   | 6,139 |
| 0            | Unknown                                                                                                                              | 6,138 |
| 0            | Unknown                                                                                                                              | 6,137 |
| Ercc5        | Rattus norvegicus excision repair cross-complementing rodent repair deficiency, complementation group 5 (Ercc5), mRNA [NM_001106910] | 6,137 |
| Ube2q1       | Rattus norvegicus ubiquitin-conjugating enzyme E2Q family member 1 (Ube2q1), mRNA [NM_001106448]                                     | 6,136 |
| LOC501307    | Rattus norvegicus similar to spermatogenesis associated glutamate (E)-rich protein 4d, mRNA (cDNA clone IMAGE:7310837). [BC088860]   | 6,136 |
| 0            | large tumor suppressor Gene [Source:MGI Symbol;Acc:MGI:1333883] [ENSRNOT00000020098]                                                 | 6,136 |
| Pip5k1b      | Rattus norvegicus phosphatidylinositol-4-phosphate 5-kinase, type I, beta (Pip5k1b), mRNA [NM_001012743]                             | 6,136 |
| Tfeb         | Rattus norvegicus transcription factor EB (Tfeb), mRNA [NM_001025707]                                                                | 6,135 |
| Gnb1l        | Uncharacterized protein [Source:UniProtKB/TrEMBL;Acc:D3ZSP4] [ENSRNOT00000002596]                                                    | 6,134 |
| 0            | CD209 antigen-like protein C [Source:RefSeq peptide;Acc:NP_001178024] [ENSRNOT000000061750]                                          | 6,133 |
| Spetex-2A    | Rattus norvegicus Spetex-2A protein (Spetex-2A), mRNA [NM_001009976]                                                                 | 6,131 |
| Tnfsf13b     | Rattus norvegicus tumor necrosis factor (ligand) superfamily, member 13b (Tnfsf13b), mRNA [NM_001109112]                             | 6,131 |
| 0            | PREDICTED: Rattus norvegicus pro-histogranin (LOC502940), miscRNA [XR_009615]                                                        | 6,131 |
| 0            | Rattus norvegicus similar to putative protein kinase (LOC292372), mRNA [XM_217965]                                                   | 6,130 |
| Cdc20        | Rattus norvegicus cell division cycle 20 homolog (S. cerevisiae) (Cdc20), mRNA [NM_171993]                                           | 6,129 |
| 0            | Unknown                                                                                                                              | 6,128 |
| Vps54        | Rattus norvegicus vacuolar protein sorting 54 homolog (S. cerevisiae) (Vps54), mRNA [NM_173147]                                      | 6,127 |
| Bub1         | Rattus norvegicus budding uninhibited by benzimidazoles 1 homolog (S. cerevisiae) (Bub1), mRNA [NM_001106507]                        | 6,127 |
| Slc25a26     | Rattus norvegicus solute carrier family 25, member 26 (Slc25a26), nuclear gene encoding mitochondrial protein, mRNA [NM_001108638]   | 6,126 |
| LOC500959    | Rattus norvegicus triosephosphate isomerase (LOC500959), mRNA [NM_001033072]                                                         | 6,126 |
| LOC100363289 | Rattus norvegicus LRRGT00022-like (LOC100363289), mRNA [NM_001177825]                                                                | 6,125 |
| Lrrc1        | Rattus norvegicus leucine rich repeat containing 1 (Lrrc1), mRNA [NM_001014268]                                                      | 6,124 |
| Tctex1d2     | Rattus norvegicus Tctex1 domain containing 2 (Tctex1d2), mRNA [NM_001109054]                                                         | 6,124 |
| Bnip1        | Rattus norvegicus BCL2/adenovirus E1B interacting protein 1 (Bnip1), mRNA [NM_080897]                                                | 6,122 |
| Fbxo8        | Rattus norvegicus F-box protein 8 (Fbxo8), mRNA [NM_001012050]                                                                       | 6,122 |
| 0            | Unknown                                                                                                                              | 6,121 |
| LOC303590    | PREDICTED: Rattus norvegicus similar to cactin CG1676-PA (LOC303590), miscRNA [XR_006385]                                            | 6,121 |

|            |                                                                                                                                                                |              |
|------------|----------------------------------------------------------------------------------------------------------------------------------------------------------------|--------------|
| Hspa4l     | Rattus norvegicus heat shock protein 4-like (Hspa4l), mRNA [NM_001106428]                                                                                      | <b>6,120</b> |
| Hmgcl      | Rattus norvegicus 3-hydroxymethyl-3-methylglutaryl-Coenzyme A lyase (Hmgcl), nuclear gene encoding mitochondrial protein, mRNA [NM_024386]                     | <b>6,120</b> |
| Lipt2      | Rattus norvegicus lipoyl(octanoyl) transferase 2 (putative) (Lipt2), nuclear gene encoding mitochondrial protein, mRNA [NM_001108917]                          | <b>6,117</b> |
| 0          | Uncharacterized protein [Source:UniProtKB/TrEMBL;Acc:D3ZHM7] [ENSRNOT00000036931]                                                                              | <b>6,116</b> |
| Hist1h2ail | Rattus norvegicus histone cluster 1, H2ai-like (Hist1h2ail), mRNA [NM_001013056]                                                                               | <b>6,115</b> |
| Brp16      | Rattus norvegicus brain protein 16 (Brp16), mRNA [NM_001007707]                                                                                                | <b>6,113</b> |
| Zzz3       | Rattus norvegicus zinc finger, ZZ-type containing 3 (Zzz3), mRNA [NM_001134549]                                                                                | <b>6,112</b> |
| Pus3       | Rattus norvegicus pseudouridylate synthase 3 (Pus3), mRNA [NM_001108134]                                                                                       | <b>6,112</b> |
| Chrd       | Rattus norvegicus chordin (Chrd), mRNA [NM_057134]                                                                                                             | <b>6,111</b> |
| Ralgds     | Rattus norvegicus ral guanine nucleotide dissociation stimulator (Ralgds), mRNA [NM_019250]                                                                    | <b>6,111</b> |
| LOC363337  | Rattus norvegicus similar to RIKEN cDNA 1700081O22 (LOC363337), mRNA [NM_001014221]                                                                            | <b>6,111</b> |
| Nkain4     | Rattus norvegicus Na <sup>+</sup> /K <sup>+</sup> transporting ATPase interacting 4 (Nkain4), mRNA [NM_001106550]                                              | <b>6,111</b> |
| 0          | Unknown                                                                                                                                                        | <b>6,110</b> |
| Doc2a      | Rattus norvegicus double C2-like domains, alpha (Doc2a), mRNA [NM_022937]                                                                                      | <b>6,110</b> |
| Wdr24      | Rattus norvegicus WD repeat domain 24 (Wdr24), mRNA [NM_001191084]                                                                                             | <b>6,109</b> |
| 0          | Unknown                                                                                                                                                        | <b>6,109</b> |
| RGD1566215 | Rattus norvegicus similar to Coatomer gamma-2 subunit (Gamma-2 coat protein) (Gamma-2 COP) (RGD1566215), mRNA [NM_001106929]                                   | <b>6,108</b> |
| Dusp1      | Rattus norvegicus dual specificity phosphatase 1 (Dusp1), mRNA [NM_053769]                                                                                     | <b>6,108</b> |
| St8sia4    | Rattus norvegicus ST8 alpha-N-acetyl-neuraminide alpha-2,8-sialyltransferase 4 (St8sia4), mRNA [NM_053914]                                                     | <b>6,107</b> |
| 0          | YTH domain family protein 3 [Source:RefSeq peptide;Acc:NP_001102016] [ENSRNOT00000052093]                                                                      | <b>6,106</b> |
| Adcy7      | Rattus norvegicus adenylate cyclase 7 (Adcy7), mRNA [NM_053396]                                                                                                | <b>6,105</b> |
| Katnal2    | PREDICTED: Rattus norvegicus katanin p60 subunit A-like 2 (Katnal2), mRNA [XM_001055413]                                                                       | <b>6,105</b> |
| 0          | Unknown                                                                                                                                                        | <b>6,104</b> |
| LOC686041  | Rattus norvegicus cDNA clone IMAGE:6889638, partial cds. [BC059164]                                                                                            | <b>6,104</b> |
| LOC689425  | Rattus norvegicus hypothetical protein LOC689425 (LOC689425), mRNA [NM_001135002]                                                                              | <b>6,102</b> |
| Anapc10    | Rattus norvegicus anaphase promoting complex subunit 10 (Anapc10), mRNA [NM_001108445]                                                                         | <b>6,102</b> |
| Sstr1      | Rattus norvegicus somatostatin receptor 1 (Sstr1), mRNA [NM_012719]                                                                                            | <b>6,100</b> |
| Mlycd      | Rattus norvegicus malonyl-CoA decarboxylase (Mlycd), nuclear gene encoding mitochondrial protein, mRNA [NM_053477]                                             | <b>6,100</b> |
| Olr1162    | Rattus norvegicus olfactory receptor 1162 (Olr1162), mRNA [NM_001000870]                                                                                       | <b>6,098</b> |
| Ndufv3     | Rattus norvegicus NADH dehydrogenase (ubiquinone) flavoprotein 3 (Ndufv3), nuclear gene encoding mitochondrial protein, transcript variant 1, mRNA [NM_022607] | <b>6,098</b> |
| 0          | Uncharacterized protein [Source:UniProtKB/TrEMBL;Acc:D3ZGN8] [ENSRNOT00000049028]                                                                              | <b>6,097</b> |
| 0          | Unknown                                                                                                                                                        | <b>6,096</b> |

|            |                                                                                                                                                   |              |
|------------|---------------------------------------------------------------------------------------------------------------------------------------------------|--------------|
| 0          | Unknown                                                                                                                                           | <b>6,096</b> |
| Mia        | Rattus norvegicus melanoma inhibitory activity (Mia), mRNA [NM_030852]                                                                            | <b>6,094</b> |
| Mtdh       | Rattus norvegicus metadherin (Mtdh), mRNA [NM_133398]                                                                                             | <b>6,094</b> |
| Nsun6      | Rattus norvegicus NOL1/NOP2/Sun domain family, member 6 (Nsun6), mRNA [NM_001107367]                                                              | <b>6,094</b> |
| Jag2       | PREDICTED: Rattus norvegicus jagged 2 (Jag2), mRNA [XM_001073124]                                                                                 | <b>6,094</b> |
| Col6a3     | Rattus norvegicus procollagen, type VI, alpha 3 (Col6a3), mRNA [NM_001109008]                                                                     | <b>6,092</b> |
| RGD1559748 | Rattus norvegicus similar to Palate lung and nasal carcinoma-like protein precursor (Tongue plunc-like protein) (RGD1559748), mRNA [NM_001107792] | <b>6,092</b> |
| Trim45     | Rattus norvegicus tripartite motif-containing 45 (Trim45), mRNA [NM_001106453]                                                                    | <b>6,091</b> |
| Cby3       | PREDICTED: Rattus norvegicus chibby homolog 3 (Drosophila) (Cby3), mRNA [XM_001074756]                                                            | <b>6,091</b> |
| Olr1475    | Rattus norvegicus olfactory receptor 1475 (Olr1475), mRNA [NM_001000027]                                                                          | <b>6,090</b> |
| lqce       | Uncharacterized protein [Source:UniProtKB/TrEMBL;Acc:D3ZUL9] [ENSRNOT00000051565]                                                                 | <b>6,090</b> |
| Neto2      | Neuropilin and tolloid-like protein 2 [Source:UniProtKB/Swiss-Prot;Acc:C6K2K4] [ENSRNOT00000021739]                                               | <b>6,089</b> |
| 0          | Uncharacterized protein [Source:UniProtKB/TrEMBL;Acc:D3ZJP9] [ENSRNOT00000033716]                                                                 | <b>6,089</b> |
| Triml2     | Rattus norvegicus tripartite motif family-like 2 (Triml2), mRNA [NM_001191690]                                                                    | <b>6,089</b> |
| Itga6      | Integrin alpha 6 subchain [Source:UniProtKB/TrEMBL;Acc:Q924W3] [ENSRNOT00000002075]                                                               | <b>6,087</b> |
| Bcl6       | Rattus norvegicus B-cell CLL/lymphoma 6 (Bcl6), mRNA [NM_001107084]                                                                               | <b>6,087</b> |
| Gnb4       | Rattus norvegicus guanine nucleotide binding protein (G protein), beta polypeptide 4 (Gnb4), mRNA [NM_001013910]                                  | <b>6,085</b> |
| Utx        | Uncharacterized protein [Source:UniProtKB/TrEMBL;Acc:D4ADF1] [ENSRNOT00000005742]                                                                 | <b>6,084</b> |
| Yy1        | Rattus norvegicus YY1 transcription factor (Yy1), mRNA [NM_173290]                                                                                | <b>6,084</b> |
| LOC685909  | Rattus norvegicus similar to H2A histone family, member V isoform 1 (LOC685909), mRNA [NM_001106019]                                              | <b>6,083</b> |
| LOC686240  | PREDICTED: Rattus norvegicus similar to NMDA receptor regulated 1-like, transcript variant 2 (LOC686240), mRNA [XM_001073064]                     | <b>6,082</b> |
| Dusp26     | Rattus norvegicus dual specificity phosphatase 26 (putative) (Dusp26), mRNA [NM_001012352]                                                        | <b>6,082</b> |
| Ccdc90b    | Rattus norvegicus coiled-coil domain containing 90B (Ccdc90b), mRNA [NM_001024885]                                                                | <b>6,082</b> |
| RGD1309765 | Rattus norvegicus similar to hypothetical protein (RGD1309765), mRNA [NM_001169115]                                                               | <b>6,082</b> |
| Fam161a    | Rattus norvegicus family with sequence similarity 161, member A (Fam161a), mRNA [NM_001013876]                                                    | <b>6,081</b> |
| Yme1l1     | Rattus norvegicus YME1-like 1 (S. cerevisiae) (Yme1l1), nuclear gene encoding mitochondrial protein, mRNA [NM_053682]                             | <b>6,081</b> |
| Tph1       | Rattus norvegicus tryptophan hydroxylase 1 (Tph1), mRNA [NM_001100634]                                                                            | <b>6,081</b> |
| Thumpd1    | Rattus norvegicus THUMP domain containing 1 (Thumpd1), mRNA [NM_001009688]                                                                        | <b>6,080</b> |
| 0          | Unknown                                                                                                                                           | <b>6,080</b> |
| fut10      | Rattus norvegicus alpha3-fucosyltransferase (fut10), mRNA [NM_001012360]                                                                          | <b>6,080</b> |
| Ints12     | Rattus norvegicus integrator complex subunit 12 (Ints12), mRNA [NM_001007640]                                                                     | <b>6,079</b> |
| Comm3      | Rattus norvegicus COMM domain containing 3 (Comm3), mRNA [NM_198732]                                                                              | <b>6,079</b> |
| 0          | Uncharacterized protein [Source:UniProtKB/TrEMBL;Acc:D4A3V7] [ENSRNOT00000023451]                                                                 | <b>6,079</b> |

|            |                                                                                                                                                  |              |
|------------|--------------------------------------------------------------------------------------------------------------------------------------------------|--------------|
| Oxsm       | Rattus norvegicus 3-oxoacyl-ACP synthase, mitochondrial (Oxsm), nuclear gene encoding mitochondrial protein, mRNA [NM_001100508]                 | <b>6,079</b> |
| 0          | Rattus norvegicus similar to SEPIAPTERIN REDUCTASE (SPR) (LOC297402), mRNA [XM_216190]                                                           | <b>6,077</b> |
| Kcns3      | Rattus norvegicus potassium voltage-gated channel, delayed-rectifier, subfamily S, member 3 (Kcns3), mRNA [NM_031778]                            | <b>6,077</b> |
| Lrrc68     | Rattus norvegicus leucine rich repeat containing 68 (Lrrc68), mRNA [NM_001107482]                                                                | <b>6,077</b> |
| Pih1d1     | Rattus norvegicus PIH1 domain containing 1 (Pih1d1), mRNA [NM_001024868]                                                                         | <b>6,076</b> |
| LOC686456  | PREDICTED: Rattus norvegicus similar to zinc finger protein 218 (LOC686456), mRNA [XM_001074194]                                                 | <b>6,075</b> |
| 0          | Unknown                                                                                                                                          | <b>6,075</b> |
| Klk1l      | Rattus norvegicus kallikrein 1-like peptidase (Klk1l), mRNA [NM_012593]                                                                          | <b>6,074</b> |
| Amz1       | Rattus norvegicus archaelysin family metallopeptidase 1 (Amz1), mRNA [NM_001047092]                                                              | <b>6,074</b> |
| 0          | Unknown                                                                                                                                          | <b>6,073</b> |
| Arih2      | Rattus norvegicus ariadne homolog 2 (Drosophila) (Arih2), mRNA [NM_001012275]                                                                    | <b>6,073</b> |
| Ankrd1     | Rattus norvegicus ankyrin repeat domain 1 (cardiac muscle) (Ankrd1), mRNA [NM_013220]                                                            | <b>6,073</b> |
| 0          | Uncharacterized protein [Source:UniProtKB/TrEMBL;Acc:D3ZD16] [ENSRNOT00000012794]                                                                | <b>6,072</b> |
| 0          | Uncharacterized protein [Source:UniProtKB/TrEMBL;Acc:D3ZKK0] [ENSRNOT00000062086]                                                                | <b>6,071</b> |
| Tars2      | Rattus norvegicus threonyl-tRNA synthetase 2, mitochondrial (putative) (Tars2), nuclear gene encoding mitochondrial protein, mRNA [NM_001014040] | <b>6,070</b> |
| Gmpr       | Rattus norvegicus guanosine monophosphate reductase (Gmpr), mRNA [NM_057188]                                                                     | <b>6,070</b> |
| RGD1311307 | Rattus norvegicus similar to 1300014I06Rik protein (RGD1311307), mRNA [NM_001025719]                                                             | <b>6,067</b> |
| Fyco1      | Rattus norvegicus FYVE and coiled-coil domain containing 1 (Fyco1), mRNA [NM_001106870]                                                          | <b>6,066</b> |
| Maea       | Rattus norvegicus macrophage erythroblast attacher (Maea), mRNA [NM_001008319]                                                                   | <b>6,065</b> |
| 0          | Rattus norvegicus TL0ADA9YM19 mRNA sequence. [FQ228322]                                                                                          | <b>6,065</b> |
| Prdx2      | Rattus norvegicus peroxiredoxin 2 (Prdx2), nuclear gene encoding mitochondrial protein, mRNA [NM_017169]                                         | <b>6,065</b> |
| Mpdz       | Rattus norvegicus multiple PDZ domain protein (Mpdz), mRNA [NM_019196]                                                                           | <b>6,063</b> |
| Cd8b       | Rattus norvegicus CD8b molecule (Cd8b), mRNA [NM_031539]                                                                                         | <b>6,063</b> |
| Tssc4      | Rattus norvegicus tumor suppressing subtransferable candidate 4 (Tssc4), mRNA [NM_001013194]                                                     | <b>6,062</b> |
| Tchh       | PREDICTED: Rattus norvegicus trichohyalin (Tchh), mRNA [XM_001054694]                                                                            | <b>6,062</b> |
| Far1       | Rattus norvegicus fatty acyl CoA reductase 1 (Far1), mRNA [NM_001011933]                                                                         | <b>6,062</b> |
| RGD1564964 | Rattus norvegicus similar to WD repeat domain 11 protein (RGD1564964), mRNA [NM_001134564]                                                       | <b>6,062</b> |
| Ifna1      | Rattus norvegicus interferon-alpha 1 (Ifna1), mRNA [NM_001014786]                                                                                | <b>6,061</b> |
| Pan2       | Rattus norvegicus PAN2 polyA specific ribonuclease subunit homolog (S. cerevisiae) (Pan2), mRNA [NM_001008862]                                   | <b>6,060</b> |
| Smchd1     | PREDICTED: Rattus norvegicus similar to RIKEN cDNA 4931400A14 (RGD1307234), mRNA [XM_001056555]                                                  | <b>6,060</b> |
| Xpo1       | Rattus norvegicus exportin 1, CRM1 homolog (yeast) (Xpo1), mRNA [NM_053490]                                                                      | <b>6,058</b> |
| Tmem212    | Rattus norvegicus transmembrane protein 212 (Tmem212), transcript variant 2, mRNA [NM_001164439]                                                 | <b>6,058</b> |
| LOC681908  | Rattus norvegicus hypothetical protein LOC681908 (LOC681908), mRNA [NM_001127609]                                                                | <b>6,055</b> |

|            |                                                                                                                          |       |
|------------|--------------------------------------------------------------------------------------------------------------------------|-------|
| 0          | Unknown                                                                                                                  | 6,054 |
| 0          | Uncharacterized protein [Source:UniProtKB/TrEMBL;Acc:D3Z8H1] [ENSRNOT00000027841]                                        | 6,054 |
| 0          | Unknown                                                                                                                  | 6,053 |
| 0          | Unknown                                                                                                                  | 6,052 |
| Zfp207     | Rattus norvegicus zinc finger protein 207 (Zfp207), mRNA [NM_001039020]                                                  | 6,051 |
| Mfap1a     | Rattus norvegicus microfibrillar-associated protein 1A (Mfap1a), mRNA [NM_001191964]                                     | 6,051 |
| RGD1565775 | LOC361980 protein [Source:UniProtKB/TrEMBL;Acc:Q56A23] [ENSRNOT00000027385]                                              | 6,051 |
| Creld1     | Rattus norvegicus cysteine-rich with EGF-like domains 1 (Creld1), mRNA [NM_001024783]                                    | 6,050 |
| 0          | Unknown                                                                                                                  | 6,049 |
| 0          | Unknown                                                                                                                  | 6,049 |
| Mcf2l      | Rattus norvegicus MCF.2 cell line derived transforming sequence-like (Mcf2l), mRNA [NM_053951]                           | 6,049 |
| Cytip      | Rattus norvegicus cytohesin 1 interacting protein (Cytip), mRNA [NM_001012086]                                           | 6,049 |
| Spock3     | Rattus norvegicus sparc/osteonectin, cwcv and kazal-like domains proteoglycan (testican) 3 (Spock3), mRNA [NM_001107310] | 6,048 |
| Tmcc3      | Rattus norvegicus transmembrane and coiled-coil domain family 3 (Tmcc3), mRNA [NM_001108084]                             | 6,047 |
| E2f1       | Rattus norvegicus E2F transcription factor 1 (E2f1), mRNA [NM_001100778]                                                 | 6,046 |
| Aurkc      | Rattus norvegicus aurora kinase C (Aurkc), mRNA [NM_001106221]                                                           | 6,046 |
| 0          | UI-R-BJ1-awi-h-01-0-UI.s1 UI-R-BJ1 Rattus norvegicus cDNA clone UI-R-BJ1-awi-h-01-0-UI 3', mRNA sequence [BE113996]      | 6,046 |
| Enpp4      | Rattus norvegicus ectonucleotide pyrophosphatase/phosphodiesterase 4 (Enpp4), mRNA [NM_001106892]                        | 6,045 |
| 0          | Unknown                                                                                                                  | 6,043 |
| Myo19      | Rattus norvegicus myosin XIX (Myo19), mRNA [NM_001163736]                                                                | 6,041 |
| Olr1583    | Rattus norvegicus olfactory receptor 1583 (Olr1583), mRNA [NM_001000080]                                                 | 6,038 |
| Nampt      | Rattus norvegicus nicotinamide phosphoribosyltransferase (Nampt), mRNA [NM_177928]                                       | 6,037 |
| Bpil3      | Rattus norvegicus bactericidal/permeability-increasing protein-like 3 (Bpil3), mRNA [NM_001107791]                       | 6,037 |
| Mif        | Rattus norvegicus macrophage migration inhibitory factor (Mif), mRNA [NM_031051]                                         | 6,037 |
| Akap11     | Rattus norvegicus A kinase (PRKA) anchor protein 11 (Akap11), mRNA [NM_012773]                                           | 6,037 |
| Irak3      | Rattus norvegicus interleukin-1 receptor-associated kinase 3 (Irak3), mRNA [NM_001108101]                                | 6,036 |
| Pik3c2a    | Rattus norvegicus phosphoinositide-3-kinase, class 2, alpha polypeptide (Pik3c2a), mRNA [NM_001108500]                   | 6,035 |
| Sbno1      | Rattus norvegicus strawberry notch homolog 1 (Drosophila) (Sbno1), mRNA [NM_001107138]                                   | 6,034 |
| Usp40      | Rattus norvegicus ubiquitin specific peptidase 40 (Usp40), mRNA [NM_001134885]                                           | 6,033 |
| Dmtf1      | Rattus norvegicus cyclin D binding myb-like transcription factor 1 (Dmtf1), mRNA [NM_053693]                             | 6,031 |
| Cyp2d3     | Rattus norvegicus cytochrome P450, family 2, subfamily d, polypeptide 3 (Cyp2d3), mRNA [NM_173093]                       | 6,030 |
| Scfd2      | Rattus norvegicus sec1 family domain containing 2 (Scfd2), mRNA [NM_001017499]                                           | 6,030 |
| Mettl10    | Rattus norvegicus methyltransferase like 10 (Mettl10), mRNA [NM_001108504]                                               | 6,030 |
| Grin1a     | Rattus norvegicus glutamate receptor, ionotropic, N-methyl D-aspartate-like 1A (Grin1a), mRNA [NM_183402]                | 6,028 |

|            |                                                                                                                                                        |              |
|------------|--------------------------------------------------------------------------------------------------------------------------------------------------------|--------------|
| Pgm2l1     | Rattus norvegicus phosphoglucomutase 2-like 1 (Pgm2l1), mRNA [NM_001109454]                                                                            | <b>6,028</b> |
| 0          | Unknown                                                                                                                                                | <b>6,026</b> |
| Rnf43      | Rattus norvegicus ring finger protein 43 (Rnf43), mRNA [NM_001135921]                                                                                  | <b>6,026</b> |
| Itih3      | Rattus norvegicus inter-alpha trypsin inhibitor, heavy chain 3 (Itih3), mRNA [NM_017351]                                                               | <b>6,025</b> |
| 0          | Uncharacterized protein [Source:UniProtKB/TrEMBL;Acc:D3Z9X6] [ENSRNOT00000064120]                                                                      | <b>6,024</b> |
| 0          | Unknown                                                                                                                                                | <b>6,023</b> |
| Atpif1     | Rattus norvegicus ATPase inhibitory factor 1 (Atpif1), nuclear gene encoding mitochondrial protein, mRNA [NM_012915]                                   | <b>6,023</b> |
| Pnck       | Rattus norvegicus pregnancy upregulated non-ubiquitously expressed CaM kinase (Pnck), mRNA [NM_017275]                                                 | <b>6,022</b> |
| Gtf2ird2   | Rattus norvegicus similar to gtf2ird2 (LOC288606), mRNA [XM_213757]                                                                                    | <b>6,022</b> |
| RGD1308380 | Rattus norvegicus similar to RIKEN cDNA 2310079F23 (RGD1308380), mRNA [NM_001130061]                                                                   | <b>6,022</b> |
| Dact2      | Rattus norvegicus dapper, antagonist of beta-catenin, homolog 2 (Xenopus laevis) (Dact2), mRNA [NM_001107464]                                          | <b>6,022</b> |
| 0          | Unknown                                                                                                                                                | <b>6,021</b> |
| Ofd1       | Rattus norvegicus oral-facial-digital syndrome 1 gene homolog (human) (Ofd1), mRNA [NM_001106961]                                                      | <b>6,021</b> |
| 0          | Unknown                                                                                                                                                | <b>6,020</b> |
| LOC685563  | PREDICTED: Rattus norvegicus similar to Discs large homolog 5 (Placenta and prostate DLG) (Discs large protein P-dlg) (LOC685563), mRNA [XM_001064312] | <b>6,019</b> |
| 0          | Uncharacterized protein [Source:UniProtKB/TrEMBL;Acc:D3ZS15] [ENSRNOT00000050823]                                                                      | <b>6,018</b> |
| Cul4a      | Rattus norvegicus cullin 4A (Cul4a), mRNA [NM_001127301]                                                                                               | <b>6,018</b> |
| 0          | Unknown                                                                                                                                                | <b>6,017</b> |
| 0          | Unknown                                                                                                                                                | <b>6,017</b> |
| 0          | Unknown                                                                                                                                                | <b>6,017</b> |
| Myadml2    | Rattus norvegicus myeloid-associated differentiation marker-like 2 (Myadml2), mRNA [NM_001128185]                                                      | <b>6,017</b> |
| Ubr2       | Rattus norvegicus ubiquitin protein ligase E3 component n-recognin 2 (Ubr2), mRNA [NM_001178071]                                                       | <b>6,016</b> |
| Sh3glb2    | Rattus norvegicus SH3-domain GRB2-like endophilin B2 (Sh3glb2), mRNA [NM_001009692]                                                                    | <b>6,016</b> |
| Cdkn2aip   | Rattus norvegicus CDKN2A interacting protein (Cdkn2aip), mRNA [NM_001014000]                                                                           | <b>6,016</b> |
| Elf1       | Rattus norvegicus E74-like factor 1 (Elf1), mRNA [NM_053520]                                                                                           | <b>6,016</b> |
| Ostf1      | Rattus norvegicus osteoclast stimulating factor 1 (Ostf1), mRNA [NM_148892]                                                                            | <b>6,016</b> |
| Acot4      | Rattus norvegicus acyl-CoA thioesterase 4 (Acot4), mRNA [NM_001109440]                                                                                 | <b>6,015</b> |
| Itm2b      | Rattus norvegicus integral membrane protein 2B (Itm2b), mRNA [NM_001006963]                                                                            | <b>6,015</b> |
| Esrp2      | Rattus norvegicus epithelial splicing regulatory protein 2 (Esrp2), mRNA [NM_001107423]                                                                | <b>6,014</b> |
| 0          | Rattus norvegicus obscurin (Obscurin) mRNA, Obscurin-S allele, partial cds. [AY167411]                                                                 | <b>6,014</b> |
| Syk        | Rattus norvegicus spleen tyrosine kinase (Syk), mRNA [NM_012758]                                                                                       | <b>6,014</b> |
| Usp40      | Rattus norvegicus ubiquitin specific peptidase 40 (Usp40), mRNA [NM_001134885]                                                                         | <b>6,014</b> |
| 0          | Unknown                                                                                                                                                | <b>6,013</b> |

|              |                                                                                                                                                          |              |
|--------------|----------------------------------------------------------------------------------------------------------------------------------------------------------|--------------|
| Cpamd8       | PREDICTED: Rattus norvegicus similar to Murinoglobulin 1 homolog (RGD1566313), mRNA [XM_213006]                                                          | <b>6,013</b> |
| 0            | Unknown                                                                                                                                                  | <b>6,009</b> |
| RT1-CE3      | Rattus norvegicus RT1 class I, locus CE3 (RT1-CE3), mRNA [NM_001008841]                                                                                  | <b>6,009</b> |
| Nop14        | Rattus norvegicus NOP14 nucleolar protein homolog (yeast) (Nop14), mRNA [NM_001106013]                                                                   | <b>6,008</b> |
| Usp1         | Rattus norvegicus ubiquitin specific peptidase like 1 (Usp1), transcript variant 1, mRNA [NM_001198555]                                                  | <b>6,007</b> |
| Cryz         | Rattus norvegicus crystallin, zeta (Cryz), mRNA [NM_001012183]                                                                                           | <b>6,006</b> |
| 0            | Uncharacterized protein [Source:UniProtKB/TrEMBL;Acc:D4A6W5] [ENSRNOT0000009094]                                                                         | <b>6,006</b> |
| Kpnb1        | Rattus norvegicus karyopherin (importin) beta 1 (Kpnb1), mRNA [NM_017063]                                                                                | <b>6,006</b> |
| Map4k3       | Rattus norvegicus mitogen-activated protein kinase kinase kinase 3 (Map4k3), mRNA [NM_133407]                                                            | <b>6,006</b> |
| Chmp7        | Rattus norvegicus CHMP family, member 7 (Chmp7), mRNA [NM_001108872]                                                                                     | <b>6,005</b> |
| Grpel2       | Rattus norvegicus GrpE-like 2, mitochondrial (Grpel2), nuclear gene encoding mitochondrial protein, mRNA [NM_001109513]                                  | <b>6,005</b> |
| 0            | Unknown                                                                                                                                                  | <b>6,004</b> |
| Sfrs12       | Rattus norvegicus splicing factor, arginine/serine-rich 12 (Sfrs12), mRNA [NM_020092]                                                                    | <b>6,002</b> |
| Lamp2        | Rattus norvegicus lysosomal-associated membrane protein 2 (Lamp2), mRNA [NM_017068]                                                                      | <b>6,002</b> |
| Pex16        | Rattus norvegicus peroxisomal biogenesis factor 16 (Pex16), mRNA [NM_001012088]                                                                          | <b>6,001</b> |
| Usp29        | Rattus norvegicus ubiquitin specific peptidase 29 (Usp29), mRNA [NM_001108465]                                                                           | <b>6,000</b> |
| LOC100361882 | PREDICTED: Rattus norvegicus rCG56785-like (LOC100361882), mRNA [XM_002730111]                                                                           | <b>6,000</b> |
| Tm4sf20      | Rattus norvegicus transmembrane 4 L six family member 20 (Tm4sf20), mRNA [NM_001109618]                                                                  | <b>5,998</b> |
| 0            | Unknown                                                                                                                                                  | <b>5,998</b> |
| Adcy6        | Rattus norvegicus adenylylate cyclase 6 (Adcy6), mRNA [NM_012821]                                                                                        | <b>5,997</b> |
| 0            | Unknown                                                                                                                                                  | <b>5,997</b> |
| Dtnbp1       | Rattus norvegicus distrobrevin binding protein 1 (Dtnbp1), mRNA [NM_001037664]                                                                           | <b>5,996</b> |
| 0            | Unknown                                                                                                                                                  | <b>5,996</b> |
| Chpt1        | Rattus norvegicus choline phosphotransferase 1 (Chpt1), mRNA [NM_001007750]                                                                              | <b>5,996</b> |
| Rnaset2      | Rattus norvegicus ribonuclease T2 (Rnaset2), mRNA [NM_001106210]                                                                                         | <b>5,995</b> |
| 0            | Unknown                                                                                                                                                  | <b>5,994</b> |
| 0            | Unknown                                                                                                                                                  | <b>5,994</b> |
| Gls2         | Rattus norvegicus glutaminase 2 (liver, mitochondrial) (Gls2), nuclear gene encoding mitochondrial protein, mRNA [NM_138904]                             | <b>5,994</b> |
| 0            | Uncharacterized protein [Source:UniProtKB/TrEMBL;Acc:D3Z9Y0] [ENSRNOT00000022886]                                                                        | <b>5,993</b> |
| Mrfap1       | MORF4 family-associated protein 1 [Source:UniProtKB/Swiss-Prot;Acc:Q5M820] [ENSRNOT00000043744]                                                          | <b>5,993</b> |
| 0            | Unknown                                                                                                                                                  | <b>5,993</b> |
| 0            | Unknown                                                                                                                                                  | <b>5,991</b> |
| Timm23       | Rattus norvegicus translocase of inner mitochondrial membrane 23 homolog (yeast) (Timm23), nuclear gene encoding mitochondrial protein, mRNA [NM_019352] | <b>5,990</b> |

|              |                                                                                                                       |              |
|--------------|-----------------------------------------------------------------------------------------------------------------------|--------------|
| 0            | Vitamin K-dependent gamma-carboxylase [Source:UniProtKB/Swiss-Prot;Acc:O88496] [ENSRNOT00000058024]                   | <b>5,990</b> |
| Thap11       | Rattus norvegicus THAP domain containing 11 (Thap11), mRNA [NM_001107422]                                             | <b>5,989</b> |
| 0            | Unknown                                                                                                               | <b>5,989</b> |
| Exoc6        | Rattus norvegicus exocyst complex component 6 (Exoc6), mRNA [NM_019277]                                               | <b>5,989</b> |
| 0            | Q3X4I5_9ACTN (Q3X4I5) Queuine/other tRNA-ribosyltransferase:Queuine tRNA-ribosyltransferase , partial (5%) [TC646930] | <b>5,988</b> |
| B3gat2       | Rattus norvegicus beta-1,3-glucuronyltransferase 2 (glucuronosyltransferase S) (B3gat2), mRNA [NM_022609]             | <b>5,985</b> |
| 0            | Unknown                                                                                                               | <b>5,985</b> |
| Lrp1b        | Rattus norvegicus low density lipoprotein-related protein 1B (deleted in tumors) (Lrp1b), mRNA [NM_001107843]         | <b>5,985</b> |
| 0            | Unknown                                                                                                               | <b>5,984</b> |
| 0            | plakophilin 4 Gene [Source:MGI Symbol;Acc:MGI:109281] [ENSRNOT00000059246]                                            | <b>5,984</b> |
| 0            | RVL12088 Wackym-Soares normalized rat vestibular cDNA library Rattus norvegicus cDNA 5', mRNA sequence [DV720985]     | <b>5,984</b> |
| Nrcam        | Rattus norvegicus neuronal cell adhesion molecule (Nrcam), mRNA [NM_013150]                                           | <b>5,983</b> |
| Ctnn         | Rattus norvegicus cortactin (Ctnn), mRNA [NM_021868]                                                                  | <b>5,983</b> |
| Adk          | Rattus norvegicus adenosine kinase (Adk), mRNA [NM_012895]                                                            | <b>5,982</b> |
| Hprt1        | Rattus norvegicus hypoxanthine phosphoribosyltransferase 1 (Hprt1), mRNA [NM_012583]                                  | <b>5,981</b> |
| Ddx18        | Rattus norvegicus DEAD (Asp-Glu-Ala-Asp) box polypeptide 18 (Ddx18), mRNA [NM_001006996]                              | <b>5,981</b> |
| LOC290577    | PREDICTED: Rattus norvegicus hypothetical LOC290577 (LOC290577), mRNA [XM_002728376]                                  | <b>5,981</b> |
| RGD1563714   | Rattus norvegicus RGD1563714 (RGD1563714), mRNA [NM_001126297]                                                        | <b>5,980</b> |
| Akr7a2       | Rattus norvegicus aldo-keto reductase family 7, member A2 (aflatoxin aldehyde reductase) (Akr7a2), mRNA [NM_134407]   | <b>5,978</b> |
| Lamb3        | Rattus norvegicus laminin, beta 3 (Lamb3), mRNA [NM_001100841]                                                        | <b>5,977</b> |
| Pdcd2        | Rattus norvegicus programmed cell death 2 (Pdcd2), mRNA [NM_031638]                                                   | <b>5,977</b> |
| LOC498276    | Rattus norvegicus Fc gamma receptor II beta (LOC498276), mRNA [NM_001135992]                                          | <b>5,977</b> |
| Dusp27       | Rattus norvegicus dual specificity phosphatase 27 (putative) (Dusp27), mRNA [NM_001191929]                            | <b>5,977</b> |
| 0            | Copper-transporting ATPase 1 [Source:UniProtKB/Swiss-Prot;Acc:P70705] [ENSRNOT00000003395]                            | <b>5,976</b> |
| LOC100364138 | PREDICTED: Rattus norvegicus ferritin light chain 1-like (LOC100364138), mRNA [XM_002726633]                          | <b>5,976</b> |
| 0            | Uncharacterized protein [Source:UniProtKB/TrEMBL;Acc:D4ADX4] [ENSRNOT00000060718]                                     | <b>5,976</b> |
| 0            | Hepatic leukemia factor [Source:UniProtKB/Swiss-Prot;Acc:Q64709] [ENSRNOT00000055664]                                 | <b>5,975</b> |
| Atp6v1a      | Rattus norvegicus ATPase, H <sup>+</sup> transporting, lysosomal V1 subunit A (Atp6v1a), mRNA [NM_001108318]          | <b>5,974</b> |
| Megf8        | PREDICTED: Rattus norvegicus multiple EGF-like-domains 8 (Megf8), mRNA [XM_341803]                                    | <b>5,973</b> |
| 0            | RGD1565316 protein [Source:UniProtKB/TrEMBL;Acc:B2RYK6] [ENSRNOT00000056421]                                          | <b>5,972</b> |
| Myeov2       | Rattus norvegicus myeloma overexpressed 2 (Myeov2), mRNA [NM_001109044]                                               | <b>5,972</b> |
| Sf4          | Rattus norvegicus splicing factor 4 (Sf4), mRNA [NM_001011920]                                                        | <b>5,972</b> |
| Bloc1s2      | Rattus norvegicus biogenesis of lysosomal organelles complex-1, subunit 2 (Bloc1s2), mRNA [NM_001037349]              | <b>5,972</b> |
| RGD1306000   | Rattus norvegicus similar to CG8043-PA (RGD1306000), mRNA [NM_001108827]                                              | <b>5,972</b> |



|            |                                                                                                                                                                |       |
|------------|----------------------------------------------------------------------------------------------------------------------------------------------------------------|-------|
| Tm7sf3     | Rattus norvegicus transmembrane 7 superfamily member 3 (Tm7sf3), mRNA [NM_001011970]                                                                           | 5,971 |
| Tmem53     | Rattus norvegicus transmembrane protein 53 (Tmem53), mRNA [NM_001107964]                                                                                       | 5,971 |
| Stau2      | Rattus norvegicus staufen, RNA binding protein, homolog 2 (Drosophila) (Stau2), transcript variant LL, mRNA [NM_001007149]                                     | 5,970 |
| Ambp       | Rattus norvegicus alpha-1-microglobulin/bikunin precursor (Ambp), mRNA [NM_012901]                                                                             | 5,970 |
| 0          | Unknown                                                                                                                                                        | 5,969 |
| Zfyve1     | Rattus norvegicus zinc finger, FYVE domain containing 1 (Zfyve1), mRNA [NM_001106743]                                                                          | 5,968 |
| Rps27a     | Rattus norvegicus ribosomal protein S27a (Rps27a), mRNA [NM_031113]                                                                                            | 5,967 |
| F11r       | Rattus norvegicus F11 receptor (F11r), mRNA [NM_053796]                                                                                                        | 5,967 |
| Ube2s      | Rattus norvegicus ubiquitin-conjugating enzyme E2S (Ube2s), mRNA [NM_001106224]                                                                                | 5,967 |
| Lysmd3     | Rattus norvegicus LysM, putative peptidoglycan-binding, domain containing 3 (Lysmd3), mRNA [NM_001009698]                                                      | 5,966 |
| Znf292     | Rattus norvegicus zinc finger protein 292 (Znf292), mRNA [NM_001008879]                                                                                        | 5,966 |
| Gtf2i      | Rattus norvegicus general transcription factor II I (Gtf2i), mRNA [NM_001001512]                                                                               | 5,965 |
| RGD1307597 | Rattus norvegicus similar to mKIAA0317 protein (RGD1307597), mRNA [NM_001106744]                                                                               | 5,964 |
| Rtf1       | Rattus norvegicus Rtf1, Paf1/RNA polymerase II complex component, homolog (S. cerevisiae) (Rtf1), mRNA [NM_001108958]                                          | 5,963 |
| Gusb       | Rattus norvegicus glucuronidase, beta (Gusb), mRNA [NM_017015]                                                                                                 | 5,962 |
| Tacc3      | Rattus norvegicus transforming, acidic coiled-coil containing protein 3 (Tacc3), mRNA [NM_001004424]                                                           | 5,960 |
| Slmo2      | Rattus norvegicus slowmo homolog 2 (Drosophila) (Slmo2), mRNA [NM_001009543]                                                                                   | 5,960 |
| 0          | Unknown                                                                                                                                                        | 5,960 |
| Ccl2       | Rattus norvegicus chemokine (C-C motif) ligand 2 (Ccl2), mRNA [NM_031530]                                                                                      | 5,960 |
| 0          | Unknown                                                                                                                                                        | 5,959 |
| RGD1309138 | Rattus norvegicus similar to hypothetical protein MGC9912 (RGD1309138), mRNA [NM_001108981]                                                                    | 5,959 |
| 0          | Rattus norvegicus TL0AAA45YD16 mRNA sequence. [FQ213860]                                                                                                       | 5,959 |
| Mapk12     | Rattus norvegicus mitogen-activated protein kinase 12 (Mapk12), mRNA [NM_021746]                                                                               | 5,958 |
| Sdf2       | Rattus norvegicus stromal cell derived factor 2 (Sdf2), mRNA [NM_001105803]                                                                                    | 5,958 |
| Chek2      | Rattus norvegicus CHK2 checkpoint homolog (S. pombe) (Chek2), mRNA [NM_053677]                                                                                 | 5,958 |
| LOC679630  | PREDICTED: Rattus norvegicus similar to eukaryotic translation initiation factor 4, gamma 1 isoform a (LOC679630), mRNA [XM_002727916]                         | 5,958 |
| Aatk       | Rattus norvegicus apoptosis-associated tyrosine kinase (Aatk), mRNA [NM_001168703]                                                                             | 5,957 |
| Mul1       | Rattus norvegicus mitochondrial ubiquitin ligase activator of NFkB 1 (Mul1), nuclear gene encoding mitochondrial protein, mRNA [NM_001106695]                  | 5,954 |
| Baz1a      | Rattus norvegicus bromodomain adjacent to zinc finger domain, 1A (Baz1a), mRNA [NM_001170568]                                                                  | 5,954 |
| St6galnac3 | Rattus norvegicus ST6 (alpha-N-acetyl-neuraminyl-2,3-beta-galactosyl-1,3)-N-acetylgalactosaminide alpha-2,6-sialyltransferase 3 (St6galnac3), mRNA [NM_019123] | 5,954 |
| Olr1135    | Rattus norvegicus olfactory receptor 1135 (Olr1135), mRNA [NM_001000878]                                                                                       | 5,953 |
| Msemb      | Rattus norvegicus microseminoprotein, beta (Msemb), mRNA [NM_019188]                                                                                           | 5,953 |
| LOC302022  | Rattus norvegicus similar to nidogen 2 protein (LOC302022), mRNA [NM_001127530]                                                                                | 5,953 |

|            |                                                                                                                                                |              |
|------------|------------------------------------------------------------------------------------------------------------------------------------------------|--------------|
| Syt8       | Rattus norvegicus synaptotagmin VIII (Syt8), mRNA [NM_053325]                                                                                  | <b>5,952</b> |
| 0          | PREDICTED: Rattus norvegicus similar to RIKEN cDNA D230037D09 gene (RGD1566396), mRNA [XM_001067433]                                           | <b>5,951</b> |
| 0          | Unknown                                                                                                                                        | <b>5,951</b> |
| RGD1310324 | Rattus norvegicus hypothetical LOC287388 (RGD1310324), mRNA [NM_001163492]                                                                     | <b>5,950</b> |
| Neur14     | Rattus norvegicus neuralized homolog 4 (Drosophila) (Neur14), mRNA [NM_001107013]                                                              | <b>5,950</b> |
| LOC501234  | PREDICTED: Rattus norvegicus hypothetical gene supported by BC082068 (LOC501234), mRNA [XM_576655]                                             | <b>5,950</b> |
| 0          | Rattus norvegicus similar to ribosomal protein S15 (LOC290226), mRNA [XM_224191]                                                               | <b>5,949</b> |
| Tmem200a   | Rattus norvegicus transmembrane protein 200A (Tmem200a), mRNA [NM_001109135]                                                                   | <b>5,949</b> |
| Gtf3a      | Rattus norvegicus general transcription factor III A (Gtf3a), mRNA [NM_001113570]                                                              | <b>5,948</b> |
| Tcea3      | Rattus norvegicus transcription elongation factor A (SII), 3 (Tcea3), mRNA [NM_001015008]                                                      | <b>5,947</b> |
| 0          | PREDICTED: Rattus norvegicus similar to ribosomal protein L30 (RGD1562394), mRNA [XM_001081708]                                                | <b>5,946</b> |
| LOC499219  | Rattus norvegicus hypothetical protein LOC499219 (LOC499219), mRNA [NM_001047938]                                                              | <b>5,945</b> |
| Fam135a    | Rattus norvegicus family with sequence similarity 135, member A (Fam135a), mRNA [NM_001134597]                                                 | <b>5,945</b> |
| RGD1562080 | PREDICTED: Rattus norvegicus similar to Hypothetical protein CBG10141 (RGD1562080), mRNA [XM_574108]                                           | <b>5,945</b> |
| Hist1h2bh  | Rattus norvegicus histone cluster 1, H2bh (Hist1h2bh), mRNA [NM_001107352]                                                                     | <b>5,944</b> |
| Slc17a9    | Rattus norvegicus solute carrier family 17, member 9 (Slc17a9), mRNA [NM_001108613]                                                            | <b>5,944</b> |
| Gcc2       | Rattus norvegicus GRIP and coiled-coil domain containing 2 (Gcc2), mRNA [NM_001107633]                                                         | <b>5,944</b> |
| Pcyox1l    | Rattus norvegicus prenylcysteine oxidase 1 like (Pcyox1l), mRNA [NM_001134542]                                                                 | <b>5,944</b> |
| 0          | Uncharacterized protein [Source:UniProtKB/TrEMBL;Acc:D3ZEZ9] [ENSRNOT00000064331]                                                              | <b>5,943</b> |
| Mgst1      | Rattus norvegicus microsomal glutathione S-transferase 1 (Mgst1), mRNA [NM_134349]                                                             | <b>5,943</b> |
| 0          | Unknown                                                                                                                                        | <b>5,942</b> |
| Tmprss9    | Rattus norvegicus transmembrane protease, serine 9 (Tmprss9), mRNA [NM_001047100]                                                              | <b>5,942</b> |
| Rhov       | Rattus norvegicus ras homolog gene family, member V (Rhov), mRNA [NM_138542]                                                                   | <b>5,942</b> |
| Nphp3      | Rattus norvegicus nephronophthisis 3 (adolescent) (Nphp3), mRNA [NM_001191882]                                                                 | <b>5,940</b> |
| Fau        | Rattus norvegicus Finkel-Biskis-Reilly murine sarcoma virus (FBR-MuSV) ubiquitously expressed (Fau), transcript variant 1, mRNA [NM_001012739] | <b>5,939</b> |
| Wdr54      | Rattus norvegicus WD repeat domain 54 (Wdr54), mRNA [NM_001109245]                                                                             | <b>5,938</b> |
| Elmod3     | Rattus norvegicus ELMO/CED-12 domain containing 3 (Elmod3), mRNA [NM_001013087]                                                                | <b>5,938</b> |
| 0          | Unknown                                                                                                                                        | <b>5,935</b> |
| Etaa1      | Rattus norvegicus Ewing tumor-associated antigen 1 (Etaa1), mRNA [NM_001109094]                                                                | <b>5,934</b> |
| 0          | Uncharacterized protein [Source:UniProtKB/TrEMBL;Acc:D3ZR70] [ENSRNOT00000030150]                                                              | <b>5,933</b> |
| LOC683761  | PREDICTED: Rattus norvegicus similar to RT1 class I, CE11 (LOC683761), partial mRNA [XM_001053482]                                             | <b>5,932</b> |
| Cyp20a1    | Rattus norvegicus cytochrome P450, family 20, subfamily a, polypeptide 1 (Cyp20a1), mRNA [NM_199401]                                           | <b>5,932</b> |
| Cbx3       | Rattus norvegicus chromobox homolog 3 (HP1 gamma homolog, Drosophila) (Cbx3), mRNA [NM_001008313]                                              | <b>5,931</b> |

|            |                                                                                                        |       |
|------------|--------------------------------------------------------------------------------------------------------|-------|
| Hist2h4    | Rattus norvegicus histone cluster 2, H4 (Hist2h4), mRNA [NM_001123469]                                 | 5,931 |
| 0          | Unknown                                                                                                | 5,931 |
| Anxa7      | Rattus norvegicus annexin A7 (Anxa7), mRNA [NM_130416]                                                 | 5,930 |
| 0          | Unknown                                                                                                | 5,930 |
| LOC686999  | Rattus norvegicus similar to M phase phosphoprotein 6 (LOC686999), mRNA [NM_001129881]                 | 5,930 |
| Yipf4      | Rattus norvegicus Yip1 domain family, member 4 (Yipf4), mRNA [NM_001009712]                            | 5,930 |
| Aldoa      | Rattus norvegicus aldolase A, fructose-bisphosphate (Aldoa), transcript variant 1, mRNA [NM_012495]    | 5,930 |
| Tmem14a    | Rattus norvegicus transmembrane protein 14A (Tmem14a), mRNA [NM_001108790]                             | 5,929 |
| 0          | Unknown                                                                                                | 5,928 |
| Exosc5     | Rattus norvegicus exosome component 5 (Exosc5), mRNA [NM_001107493]                                    | 5,928 |
| RGD1561792 | Rattus norvegicus similar to CG14903-PA (RGD1561792), mRNA [NM_001134524]                              | 5,927 |
| Pnck       | Rattus norvegicus pregnancy upregulated non-ubiquitously expressed CaM kinase (Pnck), mRNA [NM_017275] | 5,925 |
| Pdcd7      | Rattus norvegicus programmed cell death 7 (Pdcd7), mRNA [NM_001108768]                                 | 5,924 |
| RGD1306063 | Rattus norvegicus similar to HT021 (RGD1306063), mRNA [NM_001106026]                                   | 5,923 |
| RGD1566052 | Rattus norvegicus similar to elongation protein 4 homolog (RGD1566052), mRNA [NM_001115047]            | 5,922 |
| Aurka      | Rattus norvegicus aurora kinase A (Aurka), mRNA [NM_153296]                                            | 5,921 |
| Pisd       | Uncharacterized protein [Source:UniProtKB/TrEMBL;Acc:D3ZAW2] [ENSRNOT00000024813]                      | 5,920 |
| Rpa2       | Rattus norvegicus replication protein A2 (Rpa2), mRNA [NM_021582]                                      | 5,920 |
| 0          | Unknown                                                                                                | 5,919 |
| 0          | Unknown                                                                                                | 5,918 |
| Zc3h11a    | Rattus norvegicus zinc finger CCCH-type containing 11A (Zc3h11a), mRNA [NM_001047902]                  | 5,918 |
| 0          | Unknown                                                                                                | 5,918 |
| 0          | Rattus norvegicus similar to 60S RIBOSOMAL PROTEIN L5 (LOC298243), mRNA [XM_233179]                    | 5,916 |
| Fgfr1op2   | Rattus norvegicus FGFR1 oncogene partner 2 (Fgfr1op2), mRNA [NM_201421]                                | 5,916 |
| 0          | Unknown                                                                                                | 5,916 |
| Spaca4     | Rattus norvegicus sperm acrosome associated 4 (Spaca4), mRNA [NM_001109623]                            | 5,915 |
| Znf296     | PREDICTED: Rattus norvegicus zinc finger protein 296 (Znf296), mRNA [XM_001075949]                     | 5,915 |
| 0          | Unknown                                                                                                | 5,914 |
| Olr420     | Rattus norvegicus olfactory receptor 420 (Olr420), mRNA [NM_001000389]                                 | 5,914 |
| Fancf      | PREDICTED: Rattus norvegicus Fanconi anemia, complementation group F (Fancf), mRNA [XM_001080926]      | 5,913 |
| Lpgat1     | Rattus norvegicus lysophosphatidylglycerol acyltransferase 1 (Lpgat1), mRNA [NM_001109376]             | 5,913 |
| Hus1       | Rattus norvegicus HUS1 checkpoint homolog (S. pombe) (Hus1), mRNA [NM_001109092]                       | 5,912 |
| 0          | Unknown                                                                                                | 5,912 |
| Coro6      | Rattus norvegicus coronin 6 (Coro6), mRNA [NM_139115]                                                  | 5,912 |

|            |                                                                                                                                                                            |              |
|------------|----------------------------------------------------------------------------------------------------------------------------------------------------------------------------|--------------|
| Cxcr4      | Rattus norvegicus chemokine (C-X-C motif) receptor 4 (Cxcr4), mRNA [NM_022205]                                                                                             | <b>5,912</b> |
| Hnrnp2     | Rattus norvegicus heterogeneous nuclear ribonucleoprotein H2 (H') (Hnrnp2), mRNA [NM_001014019]                                                                            | <b>5,912</b> |
| 0          | Unknown                                                                                                                                                                    | <b>5,911</b> |
| Wrb        | Rattus norvegicus tryptophan rich basic protein (Wrb), mRNA [NM_199373]                                                                                                    | <b>5,911</b> |
| Tp73       | Rattus norvegicus tumor protein p73 (Tp73), mRNA [NM_001108696]                                                                                                            | <b>5,910</b> |
| Vps52      | Rattus norvegicus vacuolar protein sorting 52 homolog (S. cerevisiae) (Vps52), mRNA [NM_033097]                                                                            | <b>5,910</b> |
| 0          | Rattus norvegicus similar to c-Mpl binding protein (LOC366985), mRNA [XM_345871]                                                                                           | <b>5,909</b> |
| RT1-CE13   | Rattus norvegicus RT1 class I, locus CE13 (RT1-CE13), mRNA [NM_001008836]                                                                                                  | <b>5,909</b> |
| Kcnab1     | Rattus norvegicus potassium voltage-gated channel, shaker-related subfamily, beta member 1 (Kcnab1), mRNA [NM_017303]                                                      | <b>5,908</b> |
| Dnase111   | Rattus norvegicus deoxyribonuclease 1-like 1 (Dnase111), mRNA [NM_001014223]                                                                                               | <b>5,908</b> |
| 0          | Unknown                                                                                                                                                                    | <b>5,907</b> |
| RGD1307365 | PREDICTED: Rattus norvegicus similar to KIAA1009 protein (RGD1307365), mRNA [XM_001054857]                                                                                 | <b>5,907</b> |
| LOC690728  | Rattus norvegicus similar to Protein C12orf11 (Sarcoma antigen NY-SAR-95) (LOC690728), mRNA [NM_001109608]                                                                 | <b>5,906</b> |
| Luc7l      | Rattus norvegicus LUC7-like (S. cerevisiae) (Luc7l), mRNA [NM_001024269]                                                                                                   | <b>5,905</b> |
| Cdc42se2   | Rattus norvegicus CDC42 small effector 2 (Cdc42se2), mRNA [NM_001126089]                                                                                                   | <b>5,904</b> |
| 0          | Unknown                                                                                                                                                                    | <b>5,902</b> |
| Klri2      | Rattus norvegicus killer cell lectin-like receptor family I member 2 (Klri2), mRNA [NM_001012648]                                                                          | <b>5,902</b> |
| RGD1565690 | Uncharacterized protein [Source:UniProtKB/TrEMBL;Acc:D3ZF21] [ENSRNOT00000039316]                                                                                          | <b>5,901</b> |
| 0          | Unknown                                                                                                                                                                    | <b>5,900</b> |
| Hsp90ab1   | Rattus norvegicus heat shock protein 90 alpha (cytosolic), class B member 1 (Hsp90ab1), mRNA [NM_001004082]                                                                | <b>5,900</b> |
| Dok1       | Rattus norvegicus docking protein 1 (Dok1), mRNA [NM_001025416]                                                                                                            | <b>5,900</b> |
| Cryaa      | Rattus norvegicus crystallin, alpha A (Cryaa), mRNA [NM_012534]                                                                                                            | <b>5,900</b> |
| RGD1564839 | Uncharacterized protein [Source:UniProtKB/TrEMBL;Acc:D3ZKU5] [ENSRNOT00000043590]                                                                                          | <b>5,899</b> |
| 0          | Unknown                                                                                                                                                                    | <b>5,898</b> |
| Ppp1r14b   | Rattus norvegicus protein phosphatase 1, regulatory (inhibitor) subunit 14B (Ppp1r14b), mRNA [NM_172045]                                                                   | <b>5,898</b> |
| 0          | Unknown                                                                                                                                                                    | <b>5,897</b> |
| 0          | Unknown                                                                                                                                                                    | <b>5,896</b> |
| Sp110      | Rattus norvegicus SP110 nuclear body protein (Sp110), mRNA [NM_001034137]                                                                                                  | <b>5,895</b> |
| RGD1309108 | PREDICTED: Rattus norvegicus similar to hypothetical protein FLJ23554 (RGD1309108), mRNA [XM_236102]                                                                       | <b>5,894</b> |
| Kbtbd8     | Rattus norvegicus kelch repeat and BTB (POZ) domain containing 8 (Kbtbd8), mRNA [NM_001109250]                                                                             | <b>5,894</b> |
| Sp100      | Rattus norvegicus SP100 nuclear antigen (Sp100), mRNA [NM_001014220]                                                                                                       | <b>5,894</b> |
| Actr3b     | Rattus norvegicus ARP3 actin-related protein 3 homolog B (yeast) (Actr3b), mRNA [NM_001191860]                                                                             | <b>5,894</b> |
| Slc25a1    | Rattus norvegicus solute carrier family 25 (mitochondrial carrier, citrate transporter), member 1 (Slc25a1), nuclear gene encoding mitochondrial protein, mRNA [NM_017307] | <b>5,893</b> |

|           |                                                                                                                                                      |       |
|-----------|------------------------------------------------------------------------------------------------------------------------------------------------------|-------|
| Dio1      | Rattus norvegicus deiodinase, iodothyronine, type I (Dio1), mRNA [NM_021653]                                                                         | 5,892 |
| Bysl      | Rattus norvegicus bystin-like (Bysl), mRNA [NM_182674]                                                                                               | 5,892 |
| Pacsin3   | Rattus norvegicus protein kinase C and casein kinase substrate in neurons 3 (Pacsin3), mRNA [NM_001009966]                                           | 5,891 |
| Clgn      | Rattus norvegicus calmeglin (Clgn), mRNA [NM_001109472]                                                                                              | 5,890 |
| 0         | Unknown                                                                                                                                              | 5,888 |
| Traip     | Rattus norvegicus TRAF-interacting protein (Traip), mRNA [NM_001109004]                                                                              | 5,888 |
| 0         | Uncharacterized protein [Source:UniProtKB/TrEMBL;Acc:D4A5F0] [ENSRNOT00000002917]                                                                    | 5,887 |
| Map4k2    | Rattus norvegicus mitogen activated protein kinase kinase kinase 2 (Map4k2), mRNA [NM_001106329]                                                     | 5,886 |
| Fth1      | Rattus norvegicus ferritin, heavy polypeptide 1 (Fth1), mRNA [NM_012848]                                                                             | 5,885 |
| Casp9     | Rattus norvegicus caspase 9, apoptosis-related cysteine peptidase (Casp9), mRNA [NM_031632]                                                          | 5,885 |
| Ptprk     | Rattus norvegicus protein tyrosine phosphatase, receptor type, K, extracellular region (Ptprk), mRNA [NM_001029902]                                  | 5,885 |
| Mdm1      | Rattus norvegicus Mdm1 nuclear protein homolog (mouse) (Mdm1), mRNA [NM_001017459]                                                                   | 5,884 |
| LOC688818 | PREDICTED: Rattus norvegicus similar to NEDD4-binding protein 1 (N4BP1) (LOC688818), mRNA [XM_001068419]                                             | 5,884 |
| Crem      | Rattus norvegicus cAMP responsive element modulator (Crem), transcript variant 3, mRNA [NM_001110860]                                                | 5,884 |
| 0         | AE001111 <i>A. fulgidus</i> predicted coding region AF2391 { <i>Archaeoglobus fulgidus</i> DSM 4304} (exp=-1; wgp=0; cg=1), partial (26%) [TC624087] | 5,883 |
| Smcr7l    | Rattus norvegicus Smith-Magenis syndrome chromosome region, candidate 7-like (human) (Smcr7l), mRNA [NM_001007709]                                   | 5,883 |
| Eef1g     | Rattus norvegicus eukaryotic translation elongation factor 1 gamma (Eef1g), mRNA [NM_001004223]                                                      | 5,882 |
| 0         | Unknown                                                                                                                                              | 5,881 |
| Sephs2    | Rattus norvegicus selenophosphate synthetase 2 (Sephs2), mRNA [NM_001079889]                                                                         | 5,881 |
| Zkscan5   | Rattus norvegicus zinc finger with KRAB and SCAN domains 5 (Zkscan5), mRNA [NM_001107119]                                                            | 5,880 |
| 0         | Unknown                                                                                                                                              | 5,879 |
| 0         | Rattus norvegicus similar to ribosomal protein S24 (LOC315035), mRNA [XM_235376]                                                                     | 5,878 |
| 0         | Rattus norvegicus similar to melanocyte-specific gene 1 protein (LOC309188), mRNA [XM_219543]                                                        | 5,877 |
| Taf2      | Rattus norvegicus TAF2 RNA polymerase II, TATA box binding protein (TBP)-associated factor (Taf2), mRNA [NM_133319]                                  | 5,877 |
| 0         | Uncharacterized protein [Source:UniProtKB/TrEMBL;Acc:D4A6Z9] [ENSRNOT000000057567]                                                                   | 5,877 |
| Tmem2     | Rattus norvegicus transmembrane protein 2 (Tmem2), mRNA [NM_001107596]                                                                               | 5,876 |
| Megf6     | Rattus norvegicus multiple EGF-like-domains 6 (Megf6), mRNA [NM_022955]                                                                              | 5,876 |
| Rfc1      | Rattus norvegicus replication factor C (activator 1) 1 (Rfc1), mRNA [NM_053547]                                                                      | 5,875 |
| Aga       | Rattus norvegicus aspartylglucosaminidase (Aga), mRNA [NM_001031641]                                                                                 | 5,875 |
| Pik3r3    | Rattus norvegicus phosphoinositide-3-kinase, regulatory subunit 3 (gamma) (Pik3r3), mRNA [NM_022213]                                                 | 5,874 |
| 0         | Unknown                                                                                                                                              | 5,874 |
| Qtrt1     | Rattus norvegicus queuine tRNA-ribosyltransferase 1 (Qtrt1), mRNA [NM_022250]                                                                        | 5,874 |
| Fau       | Rattus norvegicus Finkel-Biskis-Reilly murine sarcoma virus (FBR-MuSV) ubiquitously expressed (Fau), transcript variant 1, mRNA [NM_001012739]       | 5,873 |

|            |                                                                                                                                             |              |
|------------|---------------------------------------------------------------------------------------------------------------------------------------------|--------------|
| Znf777     | Rattus norvegicus zinc finger protein 777 (Znf777), mRNA [NM_001109348]                                                                     | <b>5,870</b> |
| Rfwd3      | Rattus norvegicus TL0AEA87YO10 mRNA sequence. [FQ230829]                                                                                    | <b>5,870</b> |
| Lysmd2     | Rattus norvegicus LysM, putative peptidoglycan-binding, domain containing 2 (Lysmd2), mRNA [NM_001106839]                                   | <b>5,869</b> |
| RT1-CE14   | Rattus norvegicus RT1 class I, locus CE14 (RT1-CE14), transcript variant 1, mRNA [NM_001008837]                                             | <b>5,869</b> |
| RGD1309829 | Rattus norvegicus similar to dJ842G6.1.1 (novel protein) (RGD1309829), mRNA [NM_001126371]                                                  | <b>5,869</b> |
| 0          | Rattus norvegicus TL0ACA41Y114 mRNA sequence. [FQ216706]                                                                                    | <b>5,868</b> |
| Phospho2   | Rattus norvegicus phosphatase, orphan 2 (Phospho2), mRNA [NM_001007642]                                                                     | <b>5,868</b> |
| Dcaf17     | Rattus norvegicus DDB1 and CUL4 associated factor 17 (Dcaf17), mRNA [NM_001177688]                                                          | <b>5,866</b> |
| 0          | UI-R-BS1-azr-f-06-0-UI.s1 UI-R-BS1 Rattus norvegicus cDNA clone UI-R-BS1-azr-f-06-0-UI 3', mRNA sequence [BE118692]                         | <b>5,866</b> |
| Wwc2       | Rattus norvegicus WW and C2 domain containing 2 (Wwc2), mRNA [NM_001109111]                                                                 | <b>5,866</b> |
| Olr916     | Rattus norvegicus olfactory receptor 916 (Olr916), mRNA [NM_001000587]                                                                      | <b>5,865</b> |
| Memo1      | Rattus norvegicus mediator of cell motility 1 (Memo1), mRNA [NM_001029917]                                                                  | <b>5,864</b> |
| Zfp364     | Rattus norvegicus zinc finger protein 364 (Zfp364), mRNA [NM_001108560]                                                                     | <b>5,864</b> |
| Rdbp       | Rattus norvegicus RD RNA-binding protein (Rdbp), transcript variant 1, mRNA [NM_212548]                                                     | <b>5,861</b> |
| RGD1562012 | Rattus norvegicus RGD1562012 (RGD1562012), mRNA [NM_001173471]                                                                              | <b>5,860</b> |
| Chmp5      | Rattus norvegicus chromatin modifying protein 5 (Chmp5), mRNA [NM_001025410]                                                                | <b>5,860</b> |
| Rpl12      | Uncharacterized protein [Source:UniProtKB/TrEMBL;Acc:D3ZJE2] [ENSRNOT00000003002]                                                           | <b>5,859</b> |
| Hcfc2      | Rattus norvegicus host cell factor C2 (Hcfc2), mRNA [NM_001008357]                                                                          | <b>5,858</b> |
| Itgb1      | Rattus norvegicus integrin, beta 1 (Itgb1), mRNA [NM_017022]                                                                                | <b>5,858</b> |
| Gpr139     | Rattus norvegicus G protein-coupled receptor 139 (Gpr139), mRNA [NM_001024241]                                                              | <b>5,858</b> |
| Psen2      | Rattus norvegicus presenilin 2 (Psen2), mRNA [NM_031087]                                                                                    | <b>5,856</b> |
| Efcab2     | Rattus norvegicus EF-hand calcium binding domain 2 (Efcab2), mRNA [NM_001105977]                                                            | <b>5,856</b> |
| Gabarapl2  | Rattus norvegicus GABA(A) receptor-associated protein like 2 (Gabarapl2), mRNA [NM_022706]                                                  | <b>5,856</b> |
| Elk4       | Rattus norvegicus ELK4, ETS-domain protein (SRF accessory protein 1) (Elk4), mRNA [NM_001107173]                                            | <b>5,856</b> |
| Cog8       | Rattus norvegicus component of oligomeric golgi complex 8 (Cog8), mRNA [NM_001106182]                                                       | <b>5,855</b> |
| Aebp1      | Rattus norvegicus AE binding protein 1 (Aebp1), mRNA [NM_001100970]                                                                         | <b>5,855</b> |
| Rngtt      | Rattus norvegicus RNA guanylyltransferase and 5'-phosphatase (Rngtt), mRNA [NM_001107923]                                                   | <b>5,855</b> |
| 0          | Uncharacterized protein [Source:UniProtKB/TrEMBL;Acc:D4A3B9] [ENSRNOT000000042234]                                                          | <b>5,854</b> |
| LOC688393  | Rattus norvegicus similar to XPA binding protein 1 (LOC688393), mRNA [NM_001127572]                                                         | <b>5,854</b> |
| Ubxn11     | Rattus norvegicus UBX domain protein 11 (Ubxn11), mRNA [NM_138853]                                                                          | <b>5,853</b> |
| Klf4       | Rattus norvegicus Kruppel-like factor 4 (gut) (Klf4), mRNA [NM_053713]                                                                      | <b>5,852</b> |
| Tbx15      | Rattus norvegicus T-box 15 (Tbx15), mRNA [NM_001106451]                                                                                     | <b>5,851</b> |
| 0          | Rattus norvegicus similar to High mobility group protein 1 (HMG-1) (Amphoterin) (Heparin-binding protein p30) (LOC364873), mRNA [XM_344684] | <b>5,851</b> |
| RGD1560271 | Rattus norvegicus similar to inhibitor of MyoD family-a (RGD1560271), mRNA [NM_001109301]                                                   | <b>5,849</b> |

|            |                                                                                                                                                                         |              |
|------------|-------------------------------------------------------------------------------------------------------------------------------------------------------------------------|--------------|
| 0          | Unknown                                                                                                                                                                 | <b>5,849</b> |
| Prpf40a    | Rattus norvegicus PRP40 pre-mRNA processing factor 40 homolog A ( <i>S. cerevisiae</i> ) (Prpf40a), mRNA [NM_001106480]                                                 | <b>5,848</b> |
| RGD1563528 | Rattus norvegicus similar to Brain protein 44-like (RGD1563528), mRNA [NM_001109365]                                                                                    | <b>5,847</b> |
| Zdhhc23    | Rattus norvegicus zinc finger, DHHC-type containing 23 (Zdhhc23), mRNA [NM_213627]                                                                                      | <b>5,847</b> |
| 0          | AA957328 UI-R-E1-fu-g-08-0-UI.s1 UI-R-E1 Rattus norvegicus cDNA clone UI-R-E1-fu-g-08-0-UI 3', mRNA sequence [AA957328]                                                 | <b>5,845</b> |
| 0          | Rattus norvegicus similar to RIKEN cDNA 1700081O22 (LOC363336), mRNA [XM_343674]                                                                                        | <b>5,845</b> |
| 0          | Mast cell protease 1-like 2 [Source:UniProtKB/TrEMBL;Acc:Q6IE56] [ENSRNOT00000038253]                                                                                   | <b>5,845</b> |
| 0          | Unknown                                                                                                                                                                 | <b>5,844</b> |
| Trib3      | Rattus norvegicus tribbles homolog 3 ( <i>Drosophila</i> ) (Trib3), mRNA [NM_144755]                                                                                    | <b>5,844</b> |
| Glmn       | Rattus norvegicus glomulin, FKBP associated protein (Glmn), mRNA [NM_001105993]                                                                                         | <b>5,843</b> |
| LOC689842  | PREDICTED: Rattus norvegicus similar to Nucleolar GTP-binding protein 1 (Chronic renal failure gene protein) (GTP-binding protein NGB) (LOC689842), miscRNA [XR_006738] | <b>5,843</b> |
| Clta       | Rattus norvegicus clathrin, light chain (Lca) (Clta), mRNA [NM_031974]                                                                                                  | <b>5,842</b> |
| LOC685020  | PREDICTED: Rattus norvegicus paired immunoglobulin-like type 2 receptor alpha (Pilra), mRNA [XM_213732]                                                                 | <b>5,842</b> |
| Snx33      | Rattus norvegicus sorting nexin 33 (Snx33), mRNA [NM_001127488]                                                                                                         | <b>5,841</b> |
| LOC679774  | PREDICTED: Rattus norvegicus hypothetical protein LOC679774 (LOC679774), mRNA [XM_001054422]                                                                            | <b>5,841</b> |
| Chchd3     | Rattus norvegicus coiled-coil-helix-coiled-coil-helix domain containing 3 (Chchd3), mRNA [NM_001106588]                                                                 | <b>5,841</b> |
| 0          | Unknown                                                                                                                                                                 | <b>5,840</b> |
| Med8       | Rattus norvegicus mediator complex subunit 8 (Med8), mRNA [NM_001108673]                                                                                                | <b>5,839</b> |
| Ppa2       | Rattus norvegicus pyrophosphatase (inorganic) 2 (Ppa2), nuclear gene encoding mitochondrial protein, mRNA [NM_001135871]                                                | <b>5,837</b> |
| Eef1g      | Rattus norvegicus eukaryotic translation elongation factor 1 gamma (Eef1g), mRNA [NM_001004223]                                                                         | <b>5,837</b> |
| 0          | LRRGT00198 [Source:UniProtKB/TrEMBL;Acc:Q6QI10] [ENSRNOT00000040322]                                                                                                    | <b>5,836</b> |
| Ret        | Rattus norvegicus ret proto-oncogene (Ret), transcript variant 1, mRNA [NM_012643]                                                                                      | <b>5,836</b> |
| Dut        | Rattus norvegicus deoxyuridine triphosphatase (Dut), nuclear gene encoding mitochondrial protein, transcript variant 1, mRNA [NM_053592]                                | <b>5,836</b> |
| 0          | Unknown                                                                                                                                                                 | <b>5,835</b> |
| 0          | Unknown                                                                                                                                                                 | <b>5,835</b> |
| Osm        | Rattus norvegicus oncostatin M (Osm), mRNA [NM_001006961]                                                                                                               | <b>5,835</b> |
| Hspa12b    | Rattus norvegicus heat shock protein 12B (Hspa12b), mRNA [NM_001107778]                                                                                                 | <b>5,835</b> |
| Zfand2b    | Rattus norvegicus zinc finger, AN1 type domain 2B (Zfand2b), mRNA [NM_001025745]                                                                                        | <b>5,835</b> |
| Fhit       | Rattus norvegicus fragile histidine triad gene (Fhit), mRNA [NM_021774]                                                                                                 | <b>5,835</b> |
| Srp19      | Rattus norvegicus signal recognition particle 19 (Srp19), mRNA [NM_001106157]                                                                                           | <b>5,834</b> |
| 0          | Rattus norvegicus TL0AEA65YG02 mRNA sequence. [FQ232533]                                                                                                                | <b>5,833</b> |
| Gstcd      | Rattus norvegicus glutathione S-transferase, C-terminal domain containing (Gstcd), mRNA [NM_001107725]                                                                  | <b>5,833</b> |
| Cbx3       | Rattus norvegicus chromobox homolog 3 (HP1 gamma homolog, <i>Drosophila</i> ) (Cbx3), mRNA [NM_001008313]                                                               | <b>5,832</b> |

|            |                                                                                                                                                 |       |
|------------|-------------------------------------------------------------------------------------------------------------------------------------------------|-------|
| Cldn12     | Rattus norvegicus claudin 12 (Cldn12), mRNA [NM_001100813]                                                                                      | 5,832 |
| Klhl32     | Uncharacterized protein [Source:UniProtKB/TrEMBL;Acc:D3ZR28] [ENSRNOT00000050653]                                                               | 5,831 |
| RGD1560212 | Rattus norvegicus similar to DNA segment, Chr 18, Wayne State University 98, expressed (RGD1560212), mRNA [NM_001077676]                        | 5,829 |
| Tyw3       | Similar to RIKEN cDNA 5230400J09 (Predicted), isoform CRA_aUncharacterized protein [Source:UniProtKB/TrEMBL;Acc:D3ZHR8] [ENSRNOT00000032874]    | 5,829 |
| Otud7a     | PREDICTED: Rattus norvegicus OTU domain containing 7A (Otud7a), mRNA [XM_219703]                                                                | 5,828 |
| Erap1      | Rattus norvegicus endoplasmic reticulum aminopeptidase 1 (Erap1), mRNA [NM_030836]                                                              | 5,828 |
| Cops3      | Rattus norvegicus COP9 constitutive photomorphogenic homolog subunit 3 (Arabidopsis) (Cops3), mRNA [NM_001004200]                               | 5,828 |
| 0          | PREDICTED: Rattus norvegicus hypothetical protein LOC680789 (LOC680789), partial mRNA [XM_001058892]                                            | 5,828 |
| Mid1ip1    | Rattus norvegicus MID1 interacting protein 1 (gastrulation specific G12 homolog (zebrafish)) (Mid1ip1), mRNA [NM_206950]                        | 5,827 |
| 0          | Unknown                                                                                                                                         | 5,827 |
| Mprip      | Rattus norvegicus myosin phosphatase Rho interacting protein (Mprip), transcript variant 1, mRNA [NM_053814]                                    | 5,825 |
| Leprel2    | Rattus norvegicus leprecan-like 2 (Leprel2), mRNA [NM_001106620]                                                                                | 5,824 |
| Mcm10      | Rattus norvegicus minichromosome maintenance complex component 10 (Mcm10), mRNA [NM_001107366]                                                  | 5,824 |
| 0          | Unknown                                                                                                                                         | 5,824 |
| 0          | PREDICTED: Rattus norvegicus similar to RIKEN cDNA 9030221M09 gene (RGD1305469), mRNA [XM_001066163]                                            | 5,821 |
| RGD1565309 | PREDICTED: Rattus norvegicus similar to hypothetical protein MGC33370 (RGD1565309), mRNA [XM_573520]                                            | 5,821 |
| LOC690276  | Rattus norvegicus hypothetical protein LOC690276 (LOC690276), mRNA [NM_001109573]                                                               | 5,821 |
| Olr56      | Rattus norvegicus olfactory receptor 56 (Olr56), mRNA [NM_001000130]                                                                            | 5,821 |
| 0          | Unknown                                                                                                                                         | 5,820 |
| Otud3      | Rattus norvegicus OTU domain containing 3 (Otud3), mRNA [NM_001191983]                                                                          | 5,820 |
| Spag5      | Rattus norvegicus sperm associated antigen 5 (Spag5), mRNA [NM_001044224]                                                                       | 5,819 |
| Smc6       | Rattus norvegicus structural maintenance of chromosomes 6 (Smc6), mRNA [NM_001108014]                                                           | 5,819 |
| 0          | Uncharacterized protein [Source:UniProtKB/TrEMBL;Acc:D3ZFD6] [ENSRNOT00000065986]                                                               | 5,816 |
| Wdr18      | Rattus norvegicus WD repeat domain 18 (Wdr18), mRNA [NM_001039027]                                                                              | 5,814 |
| Gcsh       | Rattus norvegicus glycine cleavage system protein H (aminomethyl carrier) (Gcsh), nuclear gene encoding mitochondrial protein, mRNA [NM_133598] | 5,814 |
| 0          | Q3QF41_9GAMM (Q3QF41) Recombination protein O, RecO, partial (5%) [TC612601]                                                                    | 5,814 |
| 0          | PREDICTED: Rattus norvegicus similar to hypothetical protein FLJ32859 (RGD1306995), mRNA [XM_001069247]                                         | 5,812 |
| LOC685580  | RCG48030Uncharacterized protein [Source:UniProtKB/TrEMBL;Acc:D3ZML1] [ENSRNOT00000027137]                                                       | 5,812 |
| Bhlha15    | Rattus norvegicus basic helix-loop-helix family, member a15 (Bhlha15), mRNA [NM_012863]                                                         | 5,811 |
| 0          | Unknown                                                                                                                                         | 5,809 |
| Htr2b      | Rattus norvegicus 5-hydroxytryptamine (serotonin) receptor 2B (Htr2b), mRNA [NM_017250]                                                         | 5,808 |
| Cep78      | Rattus norvegicus centrosomal protein 78 (Cep78), mRNA [NM_021741]                                                                              | 5,807 |



|            |                                                                                                                              |       |
|------------|------------------------------------------------------------------------------------------------------------------------------|-------|
| 0          | Unknown                                                                                                                      | 5,807 |
| Kcns2      | Rattus norvegicus potassium voltage-gated channel, delayed-rectifier, subfamily S, member 2 (Kcns2), mRNA [NM_023966]        | 5,806 |
| RT1-A2     | Rattus norvegicus RT1 class Ia, locus A2 (RT1-A2), mRNA [NM_001008829]                                                       | 5,804 |
| Edc4       | Rattus norvegicus enhancer of mRNA decapping 4 (Edc4), mRNA [NM_001033068]                                                   | 5,804 |
| Pgrmc1     | Rattus norvegicus progesterone receptor membrane component 1 (Pgrmc1), mRNA [NM_021766]                                      | 5,803 |
| Invs       | Rattus norvegicus inversin (Invs), mRNA [NM_001107932]                                                                       | 5,803 |
| 0          | Uncharacterized protein [Source:UniProtKB/TrEMBL;Acc:D4A4N9] [ENSRNOT00000016068]                                            | 5,802 |
| 0          | Uncharacterized protein [Source:UniProtKB/TrEMBL;Acc:D3ZHQ7] [ENSRNOT00000032430]                                            | 5,802 |
| Cgm4       | Rattus norvegicus carcinoembryonic antigen gene family 4 (Cgm4), mRNA [NM_012525]                                            | 5,802 |
| Fert2      | Rattus norvegicus fer (fms/fps related) protein kinase, testis specific 2 (Fert2), mRNA [NM_001106928]                       | 5,801 |
| Osbp17     | Rattus norvegicus oxysterol binding protein-like 7 (Osbp17), mRNA [NM_001107044]                                             | 5,801 |
| Ints4      | Rattus norvegicus integrator complex subunit 4 (Ints4), mRNA [NM_001191629]                                                  | 5,800 |
| Ttll1      | Rattus norvegicus tubulin tyrosine ligase-like family, member 1 (Ttll1), mRNA [NM_001012200]                                 | 5,799 |
| Ugt2b37    | Rat UDP glucuronosyltransferase-21 (UDPGTr-21) mRNA, 3' end. [M33747]                                                        | 5,799 |
| Sds        | Rattus norvegicus serine dehydratase (Sds), mRNA [NM_053962]                                                                 | 5,799 |
| Tlr6       | Rattus norvegicus toll-like receptor 6 (Tlr6), mRNA [NM_207604]                                                              | 5,798 |
| Brf2       | Rattus norvegicus BRF2, subunit of RNA polymerase III transcription initiation factor, BRF1-like (Brf2), mRNA [NM_001024773] | 5,797 |
| 0          | Unknown                                                                                                                      | 5,797 |
| Kdm4d      | Rattus norvegicus lysine (K)-specific demethylase 4D (Kdm4d), mRNA [NM_001079712]                                            | 5,797 |
| Pam        | Rattus norvegicus peptidylglycine alpha-amidating monooxygenase (Pam), mRNA [NM_013000]                                      | 5,796 |
| Lrrc33     | Rattus norvegicus leucine rich repeat containing 33 (Lrrc33), mRNA [NM_001024995]                                            | 5,796 |
| Zfp251     | Rattus norvegicus zinc finger protein 251 (Zfp251), mRNA [NM_001191911]                                                      | 5,794 |
| Tert       | Rattus norvegicus telomerase reverse transcriptase (Tert), mRNA [NM_053423]                                                  | 5,794 |
| 0          | Uncharacterized protein [Source:UniProtKB/TrEMBL;Acc:D4A3Z9] [ENSRNOT00000064084]                                            | 5,794 |
| 0          | Unknown                                                                                                                      | 5,794 |
| Ccdc52     | Rattus norvegicus coiled-coil domain containing 52 (Ccdc52), mRNA [NM_001008285]                                             | 5,794 |
| RGD1308461 | PREDICTED: Rattus norvegicus similar to RIKEN cDNA 4632415K11 (RGD1308461), mRNA [XM_002725396]                              | 5,794 |
| 0          | Unknown                                                                                                                      | 5,793 |
| Tmem90a    | Rattus norvegicus transmembrane protein 90A (Tmem90a), mRNA [NM_001109485]                                                   | 5,792 |
| Hoxd4      | Rattus norvegicus homeo box D4 (Hoxd4), mRNA [NM_001105885]                                                                  | 5,792 |
| 0          | BF412119 UI-R-BT1-bmy-h-08-0-UI.s1 UI-R-BT1 Rattus norvegicus cDNA clone UI-R-BT1-bmy-h-08-0-UI 3', mRNA sequence [BF412119] | 5,791 |
| RGD1304587 | Rattus norvegicus similar to RIKEN cDNA 2310033P09 (RGD1304587), mRNA [NM_001100551]                                         | 5,790 |
| Itgam      | integrin alpha-M [Source:RefSeq peptide;Acc:NP_036843] [ENSRNOT00000026748]                                                  | 5,790 |
| Sar1a      | Rattus norvegicus SAR1 homolog A (S. cerevisiae) (Sar1a), mRNA [NM_001007739]                                                | 5,788 |

|            |                                                                                                                                               |       |
|------------|-----------------------------------------------------------------------------------------------------------------------------------------------|-------|
| RGD1310081 | RGD1310081 protein [Source:UniProtKB/TrEMBL;Acc:Q5XHZ1] [ENSRNOT00000020170]                                                                  | 5,787 |
| Cpz        | Rattus norvegicus carboxypeptidase Z (Cpz), mRNA [NM_031766]                                                                                  | 5,787 |
| Arpc5l     | Rattus norvegicus actin related protein 2/3 complex, subunit 5-like (Arpc5l), mRNA [NM_001037767]                                             | 5,787 |
| Emb        | Rattus norvegicus embigin homolog (mouse) (Emb), mRNA [NM_053719]                                                                             | 5,786 |
| RGD1561277 | PREDICTED: Rattus norvegicus RGD1561277 (RGD1561277), mRNA [XM_579757]                                                                        | 5,786 |
| Pde7a      | Rattus norvegicus phosphodiesterase 7A (Pde7a), mRNA [NM_031080]                                                                              | 5,785 |
| Skap2      | Rattus norvegicus src kinase associated phosphoprotein 2 (Skap2), mRNA [NM_130413]                                                            | 5,785 |
| Lppr3      | Rattus norvegicus lipid phosphate phosphatase-related protein type 3 (Lppr3), mRNA [NM_181634]                                                | 5,784 |
| Ikzf2      | Rattus norvegicus IKAROS family zinc finger 2 (Ikzf2), mRNA [NM_001106916]                                                                    | 5,784 |
| 0          | Dystonin (Predicted)Uncharacterized protein [Source:UniProtKB/TrEMBL;Acc:D3ZC56] [ENSRNOT00000044452]                                         | 5,783 |
| Mrpl46     | Rattus norvegicus mitochondrial ribosomal protein L46 (Mrpl46), nuclear gene encoding mitochondrial protein, mRNA [NM_001013068]              | 5,782 |
| Hapln3     | Rattus norvegicus hyaluronan and proteoglycan link protein 3 (Hapln3), mRNA [NM_001008559]                                                    | 5,782 |
| 0          | Unknown                                                                                                                                       | 5,781 |
| Ccm2       | Rattus norvegicus cerebral cavernous malformation 2 (Ccm2), mRNA [NM_001126275]                                                               | 5,779 |
| Ddx20      | Rattus norvegicus DEAD (Asp-Glu-Ala-Asp) box polypeptide 20 (Ddx20), mRNA [NM_001191711]                                                      | 5,779 |
| 0          | Unknown                                                                                                                                       | 5,779 |
| Kcnj11     | Rattus norvegicus potassium inwardly rectifying channel, subfamily J, member 11 (Kcnj11), mRNA [NM_031358]                                    | 5,779 |
| Gar1       | Rattus norvegicus GAR1 ribonucleoprotein homolog (yeast) (Gar1), mRNA [NM_001024306]                                                          | 5,778 |
| 0          | Rattus norvegicus similar to protocadherin alpha 12 (LOC317356), mRNA [XM_228736]                                                             | 5,777 |
| Olr485     | Rattus norvegicus olfactory receptor 485 (Olr485), mRNA [NM_001000307]                                                                        | 5,777 |
| Cyld       | Rattus norvegicus cylindromatosis (turban tumor syndrome) (Cyld), mRNA [NM_001017380]                                                         | 5,776 |
| 0          | PREDICTED: Rattus norvegicus similar to fatty aldehyde dehydrogenase-like (LOC683865), mRNA [XM_001067816]                                    | 5,775 |
| Ppp1r3e    | Rattus norvegicus protein phosphatase 1, regulatory (inhibitor) subunit 3E (Ppp1r3e), mRNA [NM_001169575]                                     | 5,775 |
| Chga       | Rattus norvegicus chromogranin A (Chga), mRNA [NM_021655]                                                                                     | 5,775 |
| 0          | Unknown                                                                                                                                       | 5,773 |
| Fahd1      | Rattus norvegicus fumarylacetoacetate hydrolase domain containing 1 (Fahd1), nuclear gene encoding mitochondrial protein, mRNA [NM_001024991] | 5,773 |
| Ipcef1     | Rattus norvegicus interactor protein for cytohesin exchange factors 1 (Ipcef1), mRNA [NM_001170799]                                           | 5,773 |
| 0          | Unknown                                                                                                                                       | 5,771 |
| Otx1       | Rattus norvegicus orthodenticle homeobox 1 (Otx1), mRNA [NM_013109]                                                                           | 5,771 |
| Tmsb4x     | Rattus norvegicus thymosin beta 4, X-linked (Tmsb4x), mRNA [NM_031136]                                                                        | 5,771 |
| Olr545     | Rattus norvegicus olfactory receptor 545 (Olr545), mRNA [NM_001001053]                                                                        | 5,771 |
| Fam148b    | Uncharacterized protein [Source:UniProtKB/TrEMBL;Acc:D3ZDJ2] [ENSRNOT00000012048]                                                             | 5,770 |

|            |                                                                                                                                                                                                                                                                  |              |
|------------|------------------------------------------------------------------------------------------------------------------------------------------------------------------------------------------------------------------------------------------------------------------|--------------|
| 0          | SAM68_RAT (Q91V33) KH domain-containing, RNA-binding, signal transduction-associated protein 1 (p21 Ras GTPase-activating protein-associated p62) (GAP-associated tyrosine phosphoprotein p62) (Src-associated in mitosis 68 kDa protein) (Sam68) (p68), partial | <b>5,770</b> |
| Mettl9     | Rattus norvegicus methyltransferase like 9 (Mettl9), mRNA [NM_001163164]                                                                                                                                                                                         | <b>5,769</b> |
| RGD1307218 | Rattus norvegicus similar to RIKEN cDNA 2810432L12 (RGD1307218), mRNA [NM_001014190]                                                                                                                                                                             | <b>5,769</b> |
| Tnfrsf13b  | PREDICTED: Rattus norvegicus tumor necrosis factor receptor superfamily, member 13B (Tnfrsf13b), mRNA [XM_001079369]                                                                                                                                             | <b>5,768</b> |
| RGD1306809 | Rattus norvegicus similar to hypothetical protein FLJ30596 (RGD1306809), mRNA [NM_001044252]                                                                                                                                                                     | <b>5,768</b> |
| RGD1565883 | Rattus norvegicus similar to hypothetical protein FLJ14721 (RGD1565883), mRNA [NM_001109067]                                                                                                                                                                     | <b>5,768</b> |
| Ptcd1      | Rattus norvegicus pentatricopeptide repeat domain 1 (Ptcd1), nuclear gene encoding mitochondrial protein, mRNA [NM_001109665]                                                                                                                                    | <b>5,767</b> |
| Stat1      | Rattus norvegicus signal transducer and activator of transcription 1 (Stat1), transcript variant beta, mRNA [NM_001034164]                                                                                                                                       | <b>5,767</b> |
| Kctd3      | Rattus norvegicus potassium channel tetramerisation domain containing 3 (Kctd3), mRNA [NM_001107199]                                                                                                                                                             | <b>5,767</b> |
| Pcm1       | Rattus norvegicus pericentriolar material 1 (Pcm1), mRNA [NM_031076]                                                                                                                                                                                             | <b>5,766</b> |
| Rad1       | Rattus norvegicus RAD1 homolog (S. pombe) (Rad1), mRNA [NM_001106419]                                                                                                                                                                                            | <b>5,765</b> |
| Pcdh11x    | PREDICTED: Rattus norvegicus protocadherin 11 X-linked (Pcdh11x), mRNA [XM_001055860]                                                                                                                                                                            | <b>5,764</b> |
| Cyp2b15    | Cytochrome P450 2B15 [Source:UniProtKB/Swiss-Prot;Acc:Q64583] [ENSRNOT0000002054]                                                                                                                                                                                | <b>5,764</b> |
| Atg16l1    | Rattus norvegicus ATG16 autophagy related 16-like 1 (S. cerevisiae) (Atg16l1), mRNA [NM_001108809]                                                                                                                                                               | <b>5,763</b> |
| Esy1       | Rattus norvegicus extended synaptotagmin-like protein 1 (Esy1), mRNA [NM_017249]                                                                                                                                                                                 | <b>5,763</b> |
| Trim47     | Rattus norvegicus tripartite motif-containing 47 (Trim47), mRNA [NM_001109585]                                                                                                                                                                                   | <b>5,763</b> |
| 0          | Uncharacterized protein [Source:UniProtKB/TrEMBL;Acc:D3ZHQ7] [ENSRNOT00000057958]                                                                                                                                                                                | <b>5,763</b> |
| Hck        | Rattus norvegicus hemopoietic cell kinase (Hck), mRNA [NM_013185]                                                                                                                                                                                                | <b>5,761</b> |
| Nfrkb      | Rattus norvegicus nuclear factor related to kappa B binding protein (Nfrkb), mRNA [NM_001108133]                                                                                                                                                                 | <b>5,761</b> |
| RGD1305420 | Rattus norvegicus similar to Nef associated protein 1 (RGD1305420), mRNA [NM_001025652]                                                                                                                                                                          | <b>5,760</b> |
| Synm       | Rattus norvegicus synemin, intermediate filament protein (Synm), mRNA [NM_001134858]                                                                                                                                                                             | <b>5,759</b> |
| Ccdc72     | coiled-coil domain-containing protein 72 [Source:RefSeq peptide;Acc:NP_001119520] [ENSRNOT00000068775]                                                                                                                                                           | <b>5,759</b> |
| Dlec1      | PREDICTED: Rattus norvegicus deleted in lung and esophageal cancer 1 isoform DLEC1-N1 (Dlec1), partial mRNA [XM_001062041]                                                                                                                                       | <b>5,758</b> |
| Bat5       | Rattus norvegicus HLA-B associated transcript 5 (Bat5), mRNA [NM_212531]                                                                                                                                                                                         | <b>5,758</b> |
| Trit1      | Rattus norvegicus tRNA isopentenyltransferase 1 (Trit1), mRNA [NM_001108676]                                                                                                                                                                                     | <b>5,756</b> |
| Yipf1      | Rattus norvegicus Yip1 domain family, member 1 (Yipf1), mRNA [NM_199383]                                                                                                                                                                                         | <b>5,756</b> |
| Cbx8       | Rattus norvegicus chromobox homolog 8 (Pc class homolog, Drosophila) (Cbx8), mRNA [NM_001034078]                                                                                                                                                                 | <b>5,755</b> |
| Tax1bp1    | Rattus norvegicus Tax1 (human T-cell leukemia virus type I) binding protein 1 (Tax1bp1), mRNA [NM_001004199]                                                                                                                                                     | <b>5,755</b> |
| Usp12      | Rattus norvegicus ubiquitin specific peptidase 12 (Usp12), mRNA [NM_001166576]                                                                                                                                                                                   | <b>5,755</b> |
| 0          | UI-R-C2p-rx-c-04-0-UI.r1 UI-R-C2p Rattus norvegicus cDNA clone UI-R-C2p-rx-c-04-0-UI 5', mRNA sequence [BF545174]                                                                                                                                                | <b>5,755</b> |
| RGD1306576 | Rattus norvegicus similar to hypothetical protein (RGD1306576), mRNA [NM_001106648]                                                                                                                                                                              | <b>5,755</b> |
| Opa1       | Rattus norvegicus optic atrophy 1 homolog (human) (Opa1), nuclear gene encoding mitochondrial protein, mRNA [NM_133585]                                                                                                                                          | <b>5,754</b> |
| 0          | Unknown                                                                                                                                                                                                                                                          | <b>5,754</b> |

|           |                                                                                                                                      |       |
|-----------|--------------------------------------------------------------------------------------------------------------------------------------|-------|
| Mocs3     | Rattus norvegicus molybdenum cofactor synthesis 3 (Mocs3), mRNA [NM_001107804]                                                       | 5,754 |
| Ppp2r2d   | Rattus norvegicus protein phosphatase 2, regulatory subunit B, delta isoform (Ppp2r2d), mRNA [NM_144746]                             | 5,754 |
| Alad      | Rattus norvegicus aminolevulinate, delta-, dehydratase (Alad), mRNA [NM_012899]                                                      | 5,753 |
| Gcom1     | Rattus norvegicus GRINL1A complex locus (Gcom1), mRNA [NM_001014211]                                                                 | 5,752 |
| 0         | Unknown                                                                                                                              | 5,751 |
| Mtrr      | Rattus norvegicus 5-methyltetrahydrofolate-homocysteine methyltransferase reductase (Mtrr), mRNA [NM_001039003]                      | 5,751 |
| Lrrc49    | Rattus norvegicus leucine rich repeat containing 49 (Lrrc49), mRNA [NM_001134469]                                                    | 5,750 |
| 0         | grp75=75 kda glucose regulated protein [rats, Sprague-Dawley, brain, mRNA, 3001 nt]. [S78556]                                        | 5,750 |
| Ndfip2    | Rattus norvegicus Nedd4 family interacting protein 2 (Ndfip2), mRNA [NM_001108390]                                                   | 5,748 |
| Tnfaip2   | Rattus norvegicus tumor necrosis factor, alpha-induced protein 2 (Tnfaip2), mRNA [NM_001137633]                                      | 5,748 |
| Papss2    | Rattus norvegicus 3'-phosphoadenosine 5'-phosphosulfate synthase 2 (Papss2), mRNA [NM_001106375]                                     | 5,748 |
| Gemin4    | Rattus norvegicus gem (nuclear organelle) associated protein 4 (Gemin4), mRNA [NM_001109037]                                         | 5,748 |
| 0         | Rattus norvegicus similar to dJ132F21.2 (Contains a novel protein similar to the L82E from Drosophila) (LOC366238), mRNA [XM_345461] | 5,747 |
| 0         | Rattus norvegicus similar to RIKEN cDNA 1110011K10 (LOC315466), mRNA [XM_235929]                                                     | 5,747 |
| LOC687071 | PREDICTED: Rattus norvegicus similar to alanine-glyoxylate aminotransferase 2-like 1 (LOC687071), mRNA [XM_001076965]                | 5,746 |
| Ednra     | Rattus norvegicus endothelin receptor type A (Ednra), mRNA [NM_012550]                                                               | 5,746 |
| Stk25     | Rattus norvegicus serine/threonine kinase 25 (STE20 homolog, yeast) (Stk25), mRNA [NM_184049]                                        | 5,746 |
| Erf       | Rattus norvegicus Ets2 repressor factor (Erf), mRNA [NM_001170335]                                                                   | 5,746 |
| 0         | Unknown                                                                                                                              | 5,744 |
| Tmem213   | Uncharacterized protein [Source:UniProtKB/TrEMBL;Acc:D3ZZA5] [ENSRNOT00000018331]                                                    | 5,744 |
| Zfx       | Rattus norvegicus zinc finger protein X-linked (Zfx), mRNA [NM_001109017]                                                            | 5,743 |
| Ipo5      | Uncharacterized protein [Source:UniProtKB/TrEMBL;Acc:D4A781] [ENSRNOT00000014859]                                                    | 5,743 |
| Arih2     | Rattus norvegicus ariadne homolog 2 (Drosophila) (Arih2), mRNA [NM_001012275]                                                        | 5,743 |
| 0         | Unknown                                                                                                                              | 5,743 |
| 0         | DNJB6_MOUSE (O54946) DnaJ homolog subfamily B member 6 (Heat shock protein J2) (HSJ-2) (MRJ) (mDj4), partial (29%) [TC587510]        | 5,742 |
| Exoc7     | Rattus norvegicus exocyst complex component 7 (Exoc7), mRNA [NM_022691]                                                              | 5,742 |
| 0         | Unknown                                                                                                                              | 5,742 |
| F2r       | Rattus norvegicus coagulation factor II (thrombin) receptor (F2r), mRNA [NM_012950]                                                  | 5,742 |
| 0         | Rattus norvegicus similar to ribosomal protein S27a (LOC364669), mRNA [XM_344565]                                                    | 5,741 |
| 0         | Uncharacterized protein [Source:UniProtKB/TrEMBL;Acc:D4A911] [ENSRNOT00000037171]                                                    | 5,741 |
| Bag4      | Rattus norvegicus BCL2-associated athanogene 4 (Bag4), mRNA [NM_001025130]                                                           | 5,739 |
| Morc2     | Rattus norvegicus MORC family CW-type zinc finger 2 (Morc2), mRNA [NM_001106016]                                                     | 5,739 |
| 0         | Cytochrome b [Source:UniProtKB/Swiss-Prot;Acc:P00159] [ENSRNOT00000042098]                                                           | 5,739 |
| Zfyve28   | Rattus norvegicus zinc finger, FYVE domain containing 28 (Zfyve28), mRNA [NM_001107227]                                              | 5,738 |

|            |                                                                                                                         |       |
|------------|-------------------------------------------------------------------------------------------------------------------------|-------|
| Dhx57      | Rattus norvegicus DEAH (Asp-Glu-Ala-Asp/His) box polypeptide 57 (Dhx57), mRNA [NM_001191907]                            | 5,737 |
| LOC679976  | PREDICTED: Rattus norvegicus similar to ribosomal protein S27a (LOC679976), mRNA [XM_001057026]                         | 5,736 |
| Cdc42se2   | Rattus norvegicus CDC42 small effector 2 (Cdc42se2), mRNA [NM_001126089]                                                | 5,735 |
| Iffo1      | Rattus norvegicus intermediate filament family orphan 1 (Iffo1), mRNA [NM_001108647]                                    | 5,734 |
| Cee        | Rattus norvegicus conserved edge expressed protein (Cee), mRNA [NM_001163320]                                           | 5,734 |
| RGD1563222 | Rattus norvegicus similar to RIKEN cDNA A930018P22 (RGD1563222), mRNA [NM_001108585]                                    | 5,734 |
| Rffl       | Rattus norvegicus ring finger and FYVE like domain containing protein (Rffl), mRNA [NM_001004068]                       | 5,732 |
| RGD1306208 | Rattus norvegicus hypothetical LOC296483 (RGD1306208), mRNA [NM_001106551]                                              | 5,732 |
| 0          | Uncharacterized protein [Source:UniProtKB/TrEMBL;Acc:D3ZKL6] [ENSRNOT00000044160]                                       | 5,732 |
| 0          | Unknown                                                                                                                 | 5,730 |
| Tmem107    | Rattus norvegicus transmembrane protein 107 (Tmem107), mRNA [NM_001109648]                                              | 5,729 |
| Rnpep      | Rattus norvegicus arginyl aminopeptidase (aminopeptidase B) (Rnpep), mRNA [NM_031097]                                   | 5,729 |
| Peli3      | Rattus norvegicus pellino 3 (Peli3), mRNA [NM_001127542]                                                                | 5,727 |
| LOC299282  | Rattus norvegicus Serine protease inhibitor (LOC299282), mRNA [NM_182474]                                               | 5,727 |
| MGC125239  | Rattus norvegicus hypothetical protein LOC686179 (MGC125239), mRNA [NM_001077231]                                       | 5,723 |
| Grb14      | Rattus norvegicus growth factor receptor bound protein 14 (Grb14), mRNA [NM_031623]                                     | 5,723 |
| Ctnbp2     | Rattus norvegicus cortactin binding protein 2 (Ctnbp2), mRNA [NM_001114401]                                             | 5,723 |
| 0          | Unknown                                                                                                                 | 5,722 |
| Park7      | Rattus norvegicus Parkinson disease (autosomal recessive, early onset) 7 (Park7), mRNA [NM_057143]                      | 5,722 |
| Akap17b    | Uncharacterized protein [Source:UniProtKB/TrEMBL;Acc:D3ZDR8] [ENSRNOT00000039809]                                       | 5,722 |
| 0          | Uncharacterized protein [Source:UniProtKB/TrEMBL;Acc:D3ZGV8] [ENSRNOT00000004513]                                       | 5,722 |
| 0          | Unknown                                                                                                                 | 5,721 |
| Ybx1       | Rattus norvegicus Y box binding protein 1 (Ybx1), mRNA [NM_031563]                                                      | 5,720 |
| Sbno2      | Rattus norvegicus strawberry notch homolog 2 (Drosophila) (Sbno2), mRNA [NM_001108068]                                  | 5,720 |
| Zfp37      | Rattus norvegicus zinc finger protein 37 (Zfp37), mRNA [NM_058209]                                                      | 5,719 |
| 0          | Rattus norvegicus similar to Zfp-29 (LOC365296), mRNA [XM_344914]                                                       | 5,718 |
| 0          | Unknown                                                                                                                 | 5,718 |
| Fam20a     | Rattus norvegicus family with sequence similarity 20, member A (Fam20a), mRNA [NM_001012237]                            | 5,718 |
| Csnk1d     | Rattus norvegicus casein kinase 1, delta (Csnk1d), mRNA [NM_139060]                                                     | 5,717 |
| Oxct1      | Rattus norvegicus 3-oxoacid CoA transferase 1 (Oxct1), nuclear gene encoding mitochondrial protein, mRNA [NM_001127580] | 5,717 |
| Mdm2       | Rattus norvegicus Mdm2 p53 binding protein homolog (mouse) (Mdm2), mRNA [NM_001108099]                                  | 5,716 |
| 0          | similar to RIKEN cDNA 1700081O22 (LOC363337), mRNA [Source:RefSeq DNA;Acc:NM_001014221] [ENSRNOT00000041051]            | 5,715 |
| Nup205     | Rattus norvegicus nucleoporin 205 (Nup205), mRNA [NM_001108620]                                                         | 5,714 |
| Epo        | Rattus norvegicus erythropoietin (Epo), mRNA [NM_017001]                                                                | 5,714 |

|              |                                                                                                                                                                                          |              |
|--------------|------------------------------------------------------------------------------------------------------------------------------------------------------------------------------------------|--------------|
| Dph1         | Rattus norvegicus DPH1 homolog ( <i>S. cerevisiae</i> ) (Dph1), mRNA [NM_001105809]                                                                                                      | <b>5,714</b> |
| Ddx60        | PREDICTED: Rattus norvegicus DEAD (Asp-Glu-Ala-Asp) box polypeptide 60 (Ddx60), mRNA [XM_224795]                                                                                         | <b>5,714</b> |
| Defb22       | Rattus norvegicus defensin beta 22 (Defb22), mRNA [NM_134391]                                                                                                                            | <b>5,714</b> |
| Nfyb         | Rattus norvegicus nuclear transcription factor-Y beta (Nfyb), mRNA [NM_031553]                                                                                                           | <b>5,714</b> |
| Fam163b      | Rattus norvegicus family with sequence similarity 163, member B (Fam163b), mRNA [NM_001109458]                                                                                           | <b>5,713</b> |
| Wnt5b        | Rattus norvegicus wingless-type MMTV integration site family, member 5B (Wnt5b), mRNA [NM_001100489]                                                                                     | <b>5,713</b> |
| Nr2f6        | Rattus norvegicus nuclear receptor subfamily 2, group F, member 6 (Nr2f6), mRNA [NM_139113]                                                                                              | <b>5,713</b> |
| Prima1       | Rattus norvegicus proline rich membrane anchor 1 (Prima1), mRNA [NM_001108721]                                                                                                           | <b>5,713</b> |
| LOC100359750 | PREDICTED: Rattus norvegicus hypothetical protein LOC100359750 (LOC100359750), mRNA [XM_002728371]                                                                                       | <b>5,710</b> |
| Hspa13       | Rattus norvegicus heat shock protein 13 (Hspa13), mRNA [NM_019271]                                                                                                                       | <b>5,708</b> |
| Mto1         | Rattus norvegicus mitochondrial translation optimization 1 homolog ( <i>S. cerevisiae</i> ) (Mto1), nuclear gene encoding mitochondrial protein, mRNA [NM_001106841]                     | <b>5,707</b> |
| Smarca1      | Rattus norvegicus SWI/SNF-related, matrix-associated actin-dependent regulator of chromatin, subfamily a, containing DEAD/H box 1 (Smarca1), mRNA [NM_001107864]                         | <b>5,706</b> |
| Gjb1         | Rattus norvegicus gap junction protein, beta 1 (Gjb1), mRNA [NM_017251]                                                                                                                  | <b>5,704</b> |
| Usp45        | Rattus norvegicus ubiquitin specific peptidase 45 (Usp45), mRNA [NM_001107918]                                                                                                           | <b>5,703</b> |
| 0            | aldolase 1 A retrogene 1 Gene [Source:MGI Symbol;Acc:MGI:2447811] [ENSRNOT00000029141]                                                                                                   | <b>5,702</b> |
| RGD1561459   | Rattus norvegicus similar to RIKEN cDNA 1810020D17 (RGD1561459), mRNA [NM_001108493]                                                                                                     | <b>5,701</b> |
| Prkcz        | Rattus norvegicus protein kinase C, zeta (Prkcz), mRNA [NM_022507]                                                                                                                       | <b>5,701</b> |
| Mtnr1b       | Rattus norvegicus melatonin receptor 1B (Mtnr1b), mRNA [NM_001100641]                                                                                                                    | <b>5,700</b> |
| Neu4         | Rattus norvegicus sialidase 4 (Neu4), mRNA [NM_001108234]                                                                                                                                | <b>5,700</b> |
| Olr838       | Rattus norvegicus olfactory receptor 838 (Olr838), mRNA [NM_001000581]                                                                                                                   | <b>5,699</b> |
| Rsb1l1       | Rattus norvegicus round spermatid basic protein 1-like (Rsb1l1), mRNA [NM_001135872]                                                                                                     | <b>5,698</b> |
| 0            | Unknown                                                                                                                                                                                  | <b>5,698</b> |
| Ati3         | Rattus norvegicus atlastin GTPase 3 (Ati3), mRNA [NM_001044241]                                                                                                                          | <b>5,698</b> |
| Map9         | Rattus norvegicus microtubule-associated protein 9 (Map9), mRNA [NM_001135716]                                                                                                           | <b>5,697</b> |
| Pdcl3        | Rattus norvegicus phosducin-like 3 (Pdcl3), mRNA [NM_001025709]                                                                                                                          | <b>5,693</b> |
| 0            | Unknown                                                                                                                                                                                  | <b>5,693</b> |
| Mrpl1        | Rattus norvegicus mitochondrial ribosomal protein L1 (Mrpl1), nuclear gene encoding mitochondrial protein, mRNA [NM_001105997]                                                           | <b>5,691</b> |
| Renbp        | Rattus norvegicus renin binding protein (Renbp), mRNA [NM_031095]                                                                                                                        | <b>5,690</b> |
| Tmem116      | Rattus norvegicus transmembrane protein 116 (Tmem116), mRNA [NM_001159625]                                                                                                               | <b>5,689</b> |
| LOC501302    | PREDICTED: Rattus norvegicus hypothetical gene supported by BC082068 (LOC501302), mRNA [XM_576715]                                                                                       | <b>5,689</b> |
| Slc25a17     | Rattus norvegicus solute carrier family 25 (mitochondrial carrier, peroxisomal membrane protein), member 17 (Slc25a17), nuclear gene encoding mitochondrial protein, mRNA [NM_001126269] | <b>5,687</b> |

|            |                                                                                                                                                        |       |
|------------|--------------------------------------------------------------------------------------------------------------------------------------------------------|-------|
| Csnk1a1    | Rattus norvegicus casein kinase 1, alpha 1 (Csnk1a1), mRNA [NM_053615]                                                                                 | 5,686 |
| 0          | Histone H4Osteogenic growth peptide [Source:UniProtKB/Swiss-Prot;Acc:P62804] [ENSRNOT00000046363]                                                      | 5,685 |
| 0          | Unknown                                                                                                                                                | 5,685 |
| RGD1565210 | PREDICTED: Rattus norvegicus RGD1565210 (RGD1565210), mRNA [XM_001071740]                                                                              | 5,683 |
| LOC366709  | PREDICTED: Rattus norvegicus similar to prohibitin (LOC366709), miscRNA [XR_006662]                                                                    | 5,683 |
| RGD1563666 | Rattus norvegicus similar to chromosome X open reading frame 43 (RGD1563666), mRNA [NM_001134568]                                                      | 5,682 |
| Slc8a1     | Rattus norvegicus solute carrier family 8 (sodium/calcium exchanger), member 1 (Slc8a1), mRNA [NM_019268]                                              | 5,682 |
| 0          | Myelin-associated oligodendrocyte basic protein [Source:UniProtKB/Swiss-Prot;Acc:Q63327] [ENSRNOT00000064831]                                          | 5,681 |
| Wfdc3      | Rattus norvegicus WAP four-disulfide core domain 3 (Wfdc3), mRNA [NM_001106541]                                                                        | 5,681 |
| 0          | RCG29594Uncharacterized protein [Source:UniProtKB/TrEMBL;Acc:D3ZE42] [ENSRNOT00000000022]                                                              | 5,680 |
| Drd4       | Rattus norvegicus dopamine receptor D4 (Drd4), mRNA [NM_012944]                                                                                        | 5,679 |
| LOC685908  | PREDICTED: Rattus norvegicus similar to Discs large homolog 5 (Placenta and prostate DLG) (Discs large protein P-dlg) (LOC685908), mRNA [XM_001065719] | 5,679 |
| 0          | Uncharacterized protein [Source:UniProtKB/TrEMBL;Acc:D3ZHQ7] [ENSRNOT00000032430]                                                                      | 5,679 |
| 0          | Uncharacterized protein [Source:UniProtKB/TrEMBL;Acc:D3ZJV0] [ENSRNOT00000006968]                                                                      | 5,679 |
| Ccdc54     | Uncharacterized protein [Source:UniProtKB/TrEMBL;Acc:D4A958] [ENSRNOT00000035340]                                                                      | 5,679 |
| 0          | LRRGT00153 [Source:UniProtKB/TrEMBL;Acc:Q6QI55] [ENSRNOT00000051766]                                                                                   | 5,678 |
| 0          | Unknown                                                                                                                                                | 5,677 |
| Tmem60     | Rattus norvegicus transmembrane protein 60 (Tmem60), mRNA [NM_001191610]                                                                               | 5,676 |
| Zbtb5      | Rattus norvegicus zinc finger and BTB domain containing 5 (Zbtb5), mRNA [NM_001106657]                                                                 | 5,676 |
| Rt1.aa     | Rattus norvegicus MHC class I RT1.Aa alpha-chain (Rt1.aa), mRNA [NM_001134701]                                                                         | 5,676 |
| Ttr        | Rattus norvegicus transthyretin (Ttr), mRNA [NM_012681]                                                                                                | 5,675 |
| 0          | Uncharacterized protein [Source:UniProtKB/TrEMBL;Acc:D3ZTL3] [ENSRNOT00000034097]                                                                      | 5,675 |
| LOC690948  | PREDICTED: Rattus norvegicus similar to paired-Ig-like receptor A11 (LOC690948), mRNA [XM_002725502]                                                   | 5,675 |
| 0          | WD repeat domain 34 [Source:UniProtKB/TrEMBL;Acc:Q66H05] [ENSRNOT00000021132]                                                                          | 5,674 |
| Tdrd3      | Rattus norvegicus tudor domain containing 3 (Tdrd3), mRNA [NM_001012043]                                                                               | 5,674 |
| Pcgf3      | Rattus norvegicus polycomb group ring finger 3 (Pcgf3), mRNA [NM_001107245]                                                                            | 5,674 |
| Flot2      | Rattus norvegicus flotillin 2 (Flot2), mRNA [NM_031830]                                                                                                | 5,674 |
| Dspp       | Rattus norvegicus dentin sialophosphoprotein (Dspp), mRNA [NM_012790]                                                                                  | 5,674 |
| Bsg        | Rattus norvegicus basigin (Bsg), transcript variant 1, mRNA [NM_001109882]                                                                             | 5,674 |
| LOC499643  | Rattus norvegicus similar to hypothetical protein FLJ25371, mRNA (cDNA clone MGC:105887 IMAGE:7132360), complete cds. [BC085354]                       | 5,674 |
| 0          | Unknown                                                                                                                                                | 5,674 |
| Dnah1      | Rattus norvegicus dynein, axonemal, heavy chain 1 (Dnah1), mRNA [NM_001033655]                                                                         | 5,672 |
| Glb1I2     | Rattus norvegicus galactosidase, beta 1-like 2 (Glb1I2), mRNA [NM_001192018]                                                                           | 5,672 |

|              |                                                                                                                    |       |
|--------------|--------------------------------------------------------------------------------------------------------------------|-------|
| Gng10        | Rattus norvegicus guanine nucleotide binding protein (G protein), gamma 10 (Gng10), mRNA [NM_053660]               | 5,672 |
| RGD1308195   | Rattus norvegicus similar to secreted Ly6/uPAR related protein 2 (RGD1308195), mRNA [NM_001130551]                 | 5,671 |
| Arf1         | Rattus norvegicus ADP-ribosylation factor 1 (Arf1), mRNA [NM_022518]                                               | 5,671 |
| 0            | Uncharacterized protein [Source:UniProtKB/TrEMBL;Acc:D3ZI04] [ENSRNOT00000060225]                                  | 5,669 |
| Rab43        | Rattus norvegicus RAB43, member RAS oncogene family (Rab43), mRNA [NM_001024331]                                   | 5,669 |
| Tcfap2a      | Rattus norvegicus transcription factor AP-2, alpha (Tcfap2a), mRNA [NM_001107345]                                  | 5,669 |
| Ptcd2        | Rattus norvegicus pentatricopeptide repeat domain 2 (Ptcd2), mRNA [NM_001107648]                                   | 5,669 |
| Aamp         | Rattus norvegicus angio-associated, migratory cell protein (Aamp), mRNA [NM_001106920]                             | 5,669 |
| 0            | Unknown                                                                                                            | 5,667 |
| Olr1635      | Rattus norvegicus olfactory receptor 1635 (Olr1635), mRNA [NM_001000970]                                           | 5,666 |
| Srp72        | Rattus norvegicus signal recognition particle 72 (Srp72), mRNA [NM_001170601]                                      | 5,666 |
| Rpn2         | Rattus norvegicus ribophorin II (Rpn2), mRNA [NM_031698]                                                           | 5,665 |
| LOC100360472 | PREDICTED: Rattus norvegicus Trf-proximal protein homolog (LOC100360472), mRNA [XM_002730018]                      | 5,665 |
| 0            | Uncharacterized protein [Source:UniProtKB/TrEMBL;Acc:D3ZBR3] [ENSRNOT00000056667]                                  | 5,664 |
| Nrf1         | Rattus norvegicus nuclear respiratory factor 1 (Nrf1), mRNA [NM_001100708]                                         | 5,663 |
| LOC683626    | Rattus norvegicus similar to limb-bud and heart (LOC683626), mRNA [NM_001129880]                                   | 5,663 |
| Stmn3        | Rattus norvegicus stathmin-like 3 (Stmn3), mRNA [NM_024346]                                                        | 5,662 |
| Emid1        | Rattus norvegicus EMI domain containing 1 (Emid1), mRNA [NM_001109467]                                             | 5,662 |
| LOC685304    | Rattus norvegicus hypothetical protein LOC685304 (LOC685304), mRNA [NM_001195612]                                  | 5,661 |
| 0            | Unknown                                                                                                            | 5,661 |
| 0            | Uncharacterized protein [Source:UniProtKB/TrEMBL;Acc:D3ZRX9] [ENSRNOT00000065093]                                  | 5,661 |
| Ttll7        | Uncharacterized protein [Source:UniProtKB/TrEMBL;Acc:D4ACG4] [ENSRNOT00000055318]                                  | 5,661 |
| 0            | Unknown                                                                                                            | 5,659 |
| 0            | Unknown                                                                                                            | 5,659 |
| Cdc42bpg     | Rattus norvegicus CDC42 binding protein kinase gamma (DMPK-like) (Cdc42bpg), mRNA [NM_001130013]                   | 5,658 |
| 0            | Unknown                                                                                                            | 5,658 |
| Mcts1        | Rattus norvegicus malignant T cell amplified sequence 1 (Mcts1), mRNA [NM_001044237]                               | 5,657 |
| Clpb         | Rattus norvegicus ClpB caseinolytic peptidase B homolog (E. coli) (Clpb), mRNA [NM_022947]                         | 5,657 |
| 0            | Unknown                                                                                                            | 5,657 |
| 0            | Unknown                                                                                                            | 5,657 |
| 0            | Unknown                                                                                                            | 5,657 |
| Nufip1       | Rattus norvegicus nuclear fragile X mental retardation protein interacting protein 1 (Nufip1), mRNA [NM_001007758] | 5,656 |
| Ppp1ca       | Rattus norvegicus protein phosphatase 1, catalytic subunit, alpha isoform (Ppp1ca), mRNA [NM_031527]               | 5,656 |
| 0            | Unknown                                                                                                            | 5,656 |



|              |                                                                                                                                            |       |
|--------------|--------------------------------------------------------------------------------------------------------------------------------------------|-------|
| Ptprn2       | Rattus norvegicus protein tyrosine phosphatase, receptor type, N polypeptide 2 (Ptprn2), mRNA [NM_031600]                                  | 5,655 |
| LOC100125361 | Rattus norvegicus zinc finger protein LOC100125361 (LOC100125361), mRNA [NM_001109677]                                                     | 5,654 |
| Rims2        | Rattus norvegicus regulating synaptic membrane exocytosis 2 (Rims2), transcript variant 1, mRNA [NM_053945]                                | 5,654 |
| Rtn4         | Rattus norvegicus reticulon 4 (Rtn4), mRNA [NM_031831]                                                                                     | 5,654 |
| 0            | Uncharacterized protein [Source:UniProtKB/TrEMBL;Acc:D3Z8R9] [ENSRNOT00000015806]                                                          | 5,653 |
| Wdr26        | Rattus norvegicus WD repeat domain 26 (Wdr26), mRNA [NM_001109081]                                                                         | 5,653 |
| 0            | Uncharacterized protein [Source:UniProtKB/TrEMBL;Acc:D3ZCX9] [ENSRNOT00000041504]                                                          | 5,653 |
| MGC116202    | Rattus norvegicus hypothetical protein LOC688736 (MGC116202), mRNA [NM_001044292]                                                          | 5,653 |
| Nip30        | Rattus norvegicus NEFA-interacting nuclear protein NIP30 (Nip30), mRNA [NM_001014014]                                                      | 5,653 |
| 0            | Unknown                                                                                                                                    | 5,651 |
| 0            | Unknown                                                                                                                                    | 5,650 |
| Nat1         | Rattus norvegicus N-acetyltransferase 1 (Nat1), transcript variant 1, mRNA [NM_053853]                                                     | 5,649 |
| 0            | Uncharacterized protein [Source:UniProtKB/TrEMBL;Acc:D3ZEA5] [ENSRNOT00000047885]                                                          | 5,649 |
| Mtfr1        | Rattus norvegicus mitochondrial fission regulator 1 (Mtfr1), nuclear gene encoding mitochondrial protein, mRNA [NM_001100977]              | 5,648 |
| Acan         | Rattus norvegicus aggrecan (Acan), mRNA [NM_022190]                                                                                        | 5,648 |
| Larp6        | Rattus norvegicus La ribonucleoprotein domain family, member 6 (Larp6), mRNA [NM_001108154]                                                | 5,648 |
| 0            | Unknown                                                                                                                                    | 5,647 |
| Gjd3         | PREDICTED: Rattus norvegicus gap junction protein, delta 3 (Gjd3), mRNA [XM_001081399]                                                     | 5,646 |
| Vwa5a        | Rattus norvegicus von Willebrand factor A domain containing 5A (Vwa5a), mRNA [NM_198755]                                                   | 5,646 |
| Catsperg1    | Rattus norvegicus cation channel, sperm-associated, gamma 1 (Catsperg1), mRNA [NM_001170340]                                               | 5,646 |
| 0            | Unknown                                                                                                                                    | 5,645 |
| Spata9       | Rattus norvegicus spermatogenesis associated 9 (Spata9), mRNA [NM_001106399]                                                               | 5,645 |
| MGC109340    | Rattus norvegicus similar to Microsomal signal peptidase 23 kDa subunit (SPase 22 kDa subunit) (SPC22/23) (MGC109340), mRNA [NM_001024267] | 5,645 |
| Nit1         | Rattus norvegicus nitrilase 1 (Nit1), transcript variant 1, mRNA [NM_182668]                                                               | 5,644 |
| Sh3bp4       | Rattus norvegicus SH3-domain binding protein 4 (Sh3bp4), mRNA [NM_022693]                                                                  | 5,644 |
| Galnt6       | Rattus norvegicus UDP-N-acetyl-alpha-D-galactosamine:polypeptide N-acetylgalactosaminyltransferase 6 (Galnt6), mRNA [NM_001172063]         | 5,643 |
| 0            | Unknown                                                                                                                                    | 5,641 |
| 0            | Unknown                                                                                                                                    | 5,640 |
| Gadd45gip1   | Rattus norvegicus growth arrest and DNA-damage-inducible, gamma interacting protein 1 (Gadd45gip1), mRNA [NM_001100504]                    | 5,640 |
| Golsyn       | PREDICTED: Rattus norvegicus Golgi-localized protein (Golsyn), mRNA [XM_001064007]                                                         | 5,640 |
| 0            | Unknown                                                                                                                                    | 5,639 |
| Map2k3       | Rattus norvegicus mitogen activated protein kinase kinase 3 (Map2k3), mRNA [NM_001100674]                                                  | 5,639 |
| Nfkbia       | Rattus norvegicus nuclear factor of kappa light polypeptide gene enhancer in B-cells inhibitor, alpha (Nfkbia), mRNA [NM_001105720]        | 5,638 |

|            |                                                                                                                                                         |       |
|------------|---------------------------------------------------------------------------------------------------------------------------------------------------------|-------|
| Nkrf       | Uncharacterized protein [Source:UniProtKB/TrEMBL;Acc:D3ZSG0] [ENSRNOT00000016660]                                                                       | 5,638 |
| RGD1564290 | PREDICTED: Rattus norvegicus similar to ribosomal protein S27a (RGD1564290), mRNA [XM_001060136]                                                        | 5,638 |
| Pdxk       | Rattus norvegicus pyridoxal (pyridoxine, vitamin B6) kinase (Pdxk), mRNA [NM_031769]                                                                    | 5,635 |
| Tagln      | Rattus norvegicus transgelin (Tagln), mRNA [NM_031549]                                                                                                  | 5,634 |
| Dync1li1   | Rattus norvegicus dynein cytoplasmic 1 light intermediate chain 1 (Dync1li1), mRNA [NM_145772]                                                          | 5,633 |
| 0          | Uncharacterized protein [Source:UniProtKB/TrEMBL;Acc:D4A0Y6] [ENSRNOT00000038176]                                                                       | 5,633 |
| Manea      | Rattus norvegicus mannosidase, endo-alpha (Manea), mRNA [NM_080785]                                                                                     | 5,632 |
| 0          | Uncharacterized protein [Source:UniProtKB/TrEMBL;Acc:D3ZFL8] [ENSRNOT00000035387]                                                                       | 5,631 |
| Ccdc25     | Rattus norvegicus coiled-coil domain containing 25 (Ccdc25), mRNA [NM_001108382]                                                                        | 5,631 |
| Ard1a      | Rattus norvegicus ARD1 homolog A, N-acetyltransferase ( <i>S. cerevisiae</i> ) (Ard1a), mRNA [NM_001135839]                                             | 5,631 |
| 0          | Unknown                                                                                                                                                 | 5,630 |
| Dnajc28    | Rattus norvegicus DnaJ (Hsp40) homolog, subfamily C, member 28 (Dnajc28), mRNA [NM_001014124]                                                           | 5,630 |
| 0          | Unknown                                                                                                                                                 | 5,629 |
| Chd1       | Rattus norvegicus chromodomain helicase DNA binding protein 1 (Chd1), mRNA [NM_001107465]                                                               | 5,627 |
| Acot4      | Rattus norvegicus acyl-CoA thioesterase 4 (Acot4), mRNA [NM_001109440]                                                                                  | 5,627 |
| Rrp15      | Rattus norvegicus ribosomal RNA processing 15 homolog ( <i>S. cerevisiae</i> ) (Rrp15), mRNA [NM_001009702]                                             | 5,626 |
| Map3k14    | Rattus norvegicus mitogen-activated protein kinase kinase kinase 14 (Map3k14), mRNA [NM_001108301]                                                      | 5,626 |
| Gtf2h1     | Rattus norvegicus general transcription factor IIH, polypeptide 1 (Gtf2h1), mRNA [NM_001108485]                                                         | 5,626 |
| Aadacl1    | Rattus norvegicus arylacetamide deacetylase-like 1 (Aadacl1), mRNA [NM_001127524]                                                                       | 5,625 |
| Sdhb       | Rattus norvegicus succinate dehydrogenase complex, subunit B, iron sulfur (lp) (Sdhb), nuclear gene encoding mitochondrial protein, mRNA [NM_001100539] | 5,625 |
| Sdf4       | Rattus norvegicus stromal cell derived factor 4 (Sdf4), mRNA [NM_130412]                                                                                | 5,625 |
| Dus3l      | Rattus norvegicus dihydrouridine synthase 3-like ( <i>S. cerevisiae</i> ) (Dus3l), mRNA [NM_001034923]                                                  | 5,625 |
| Nbr1       | Rattus norvegicus neighbor of Brca1 gene 1 (Nbr1), mRNA [NM_001024765]                                                                                  | 5,624 |
| LOC680498  | PREDICTED: Rattus norvegicus similar to CG31613-PA (LOC680498), mRNA [XM_001057443]                                                                     | 5,624 |
| 0          | Uncharacterized protein [Source:UniProtKB/TrEMBL;Acc:D4A3Y9] [ENSRNOT00000011560]                                                                       | 5,623 |
| 0          | Unknown                                                                                                                                                 | 5,621 |
| Tmx4       | Rattus norvegicus thioredoxin-related transmembrane protein 4 (Tmx4), mRNA [NM_001100529]                                                               | 5,620 |
| 0          | Unknown                                                                                                                                                 | 5,620 |
| Slc39a11   | Rattus norvegicus solute carrier family 39 (metal ion transporter), member 11 (Slc39a11), mRNA [NM_001013042]                                           | 5,620 |
| Tmem194b   | Rattus norvegicus transmembrane protein 194B (Tmem194b), mRNA [NM_001134642]                                                                            | 5,618 |
| Gmps       | Rattus norvegicus guanine monphosphate synthetase (Gmps), mRNA [NM_001024754]                                                                           | 5,618 |
| Slc32a1    | Rattus norvegicus solute carrier family 32 (GABA vesicular transporter), member 1 (Slc32a1), mRNA [NM_031782]                                           | 5,618 |
| Vom1r53    | Rattus norvegicus vomeronasal 1 receptor 53 (Vom1r53), mRNA [NM_001008934]                                                                              | 5,617 |

|              |                                                                                                                   |              |
|--------------|-------------------------------------------------------------------------------------------------------------------|--------------|
| Aip          | Rattus norvegicus aryl-hydrocarbon receptor-interacting protein (Aip), mRNA [NM_172327]                           | <b>5,616</b> |
| Cflar        | Rattus norvegicus CASP8 and FADD-like apoptosis regulator (Cflar), transcript variant 1, mRNA [NM_001033864]      | <b>5,616</b> |
| Abo2         | Rattus norvegicus histo-blood group ABO system transferase 2 (Abo2), mRNA [NM_001160263]                          | <b>5,616</b> |
| Donson       | Rattus norvegicus downstream neighbor of SON (Donson), mRNA [NM_001008287]                                        | <b>5,615</b> |
| Anxa1        | Rattus norvegicus annexin A1 (Anxa1), mRNA [NM_012904]                                                            | <b>5,615</b> |
| 0            | Unknown                                                                                                           | <b>5,615</b> |
| Ppil2        | Rattus norvegicus peptidylprolyl isomerase (cyclophilin)-like 2 (Ppil2), mRNA [NM_001017383]                      | <b>5,613</b> |
| Myoc         | Rattus norvegicus myocilin (Myoc), mRNA [NM_030865]                                                               | <b>5,612</b> |
| Yeats2       | Rattus norvegicus YEATS domain containing 2 (Yeats2), mRNA [NM_001109057]                                         | <b>5,612</b> |
| Cdkn2d       | Rattus norvegicus similar to cyclin-dependent kinase inhibitor 2D (Cdkn2d), mRNA [NM_001009719]                   | <b>5,612</b> |
| LOC100360604 | Uncharacterized protein [Source:UniProtKB/TrEMBL;Acc:D3ZPN7] [ENSRNOT00000049571]                                 | <b>5,611</b> |
| LOC681309    | PREDICTED: Rattus norvegicus similar to Thrombospondin-3 precursor (LOC681309), miscRNA [XR_006034]               | <b>5,611</b> |
| 0            | Unknown                                                                                                           | <b>5,611</b> |
| Mageb3       | Rattus norvegicus melanoma antigen family B, 3 (Mageb3), mRNA [NM_001106965]                                      | <b>5,610</b> |
| Eno2         | Rattus norvegicus enolase 2, gamma, neuronal (Eno2), mRNA [NM_139325]                                             | <b>5,609</b> |
| 0            | RVL23074 Wackym-Soares normalized rat vestibular cDNA library Rattus norvegicus cDNA 5', mRNA sequence [DY471857] | <b>5,608</b> |
| 0            | Rattus norvegicus similar to 60S ribosomal protein L21 (LOC364769), mRNA [XM_344624]                              | <b>5,607</b> |
| C2           | Rattus norvegicus complement component 2 (C2), mRNA [NM_172222]                                                   | <b>5,607</b> |
| Necab3       | Rattus norvegicus N-terminal EF-hand calcium binding protein 3 (Necab3), mRNA [NM_001098724]                      | <b>5,607</b> |
| Prrx2        | Rattus norvegicus paired related homeobox 2 (Prrx2), mRNA [NM_001105739]                                          | <b>5,607</b> |
| RGD1560046   | PREDICTED: Rattus norvegicus similar to 3110052M02Rik protein (RGD1560046), mRNA [XM_002725490]                   | <b>5,607</b> |
| 0            | RCG63555RCG63717Uncharacterized protein [Source:UniProtKB/TrEMBL;Acc:D3Z9R8] [ENSRNOT00000051411]                 | <b>5,606</b> |
| RGD1566052   | Rattus norvegicus similar to elongation protein 4 homolog (RGD1566052), mRNA [NM_001115047]                       | <b>5,605</b> |
| 0            | Unknown                                                                                                           | <b>5,605</b> |
| Gpr152       | PREDICTED: Rattus norvegicus G protein-coupled receptor 152 (Gpr152), mRNA [XM_002725764]                         | <b>5,605</b> |
| Wdr4         | Rattus norvegicus WD repeat domain 4 (Wdr4), mRNA [NM_001135667]                                                  | <b>5,605</b> |
| 0            | Unknown                                                                                                           | <b>5,603</b> |
| 0            | Unknown                                                                                                           | <b>5,603</b> |
| Haus8        | Rattus norvegicus HAUS augmin-like complex, subunit 8 (Haus8), mRNA [NM_001024971]                                | <b>5,602</b> |
| 0            | Uncharacterized protein [Source:UniProtKB/TrEMBL;Acc:D4ACT3] [ENSRNOT00000042604]                                 | <b>5,601</b> |
| Lipc         | Rattus norvegicus lipase, hepatic (Lipc), mRNA [NM_012597]                                                        | <b>5,600</b> |
| 0            | Unknown                                                                                                           | <b>5,600</b> |
| Gad1         | Rattus norvegicus glutamate decarboxylase 1 (Gad1), mRNA [NM_017007]                                              | <b>5,599</b> |
| Wdr53        | Rattus norvegicus WD repeat domain 53 (Wdr53), mRNA [NM_001109055]                                                | <b>5,599</b> |

|              |                                                                                                                                                                                                   |              |
|--------------|---------------------------------------------------------------------------------------------------------------------------------------------------------------------------------------------------|--------------|
| Tm4sf19      | Rattus norvegicus transmembrane 4 L six family member 19 (Tm4sf19), mRNA [NM_001105873]                                                                                                           | <b>5,599</b> |
| RGD1306001   | Rattus norvegicus similar to 2210021J22Rik protein (RGD1306001), mRNA [NM_001130696]                                                                                                              | <b>5,598</b> |
| LOC286987    | Rattus norvegicus hemiferrin, transferrin-like protein (LOC286987), mRNA [NM_173321]                                                                                                              | <b>5,598</b> |
| Vps18        | Rattus norvegicus vacuolar protein sorting 18 homolog (S. cerevisiae) (Vps18), mRNA [NM_001106499]                                                                                                | <b>5,597</b> |
| Dtx2         | Rattus norvegicus deltex homolog 2 (Drosophila) (Dtx2), mRNA [NM_001107157]                                                                                                                       | <b>5,597</b> |
| 0            | Unknown                                                                                                                                                                                           | <b>5,596</b> |
| Dgcr6        | Rattus norvegicus DiGeorge syndrome critical region gene 6 (Dgcr6), mRNA [NM_001107080]                                                                                                           | <b>5,595</b> |
| Nell2        | Rattus norvegicus NEL-like 2 (chicken) (Nell2), mRNA [NM_031070]                                                                                                                                  | <b>5,595</b> |
| Clp1         | Rattus norvegicus CLP1, cleavage and polyadenylation factor I subunit, homolog (S. cerevisiae) (Clp1), mRNA [NM_001009599]                                                                        | <b>5,594</b> |
| Angptl4      | Rattus norvegicus angiopoietin-like 4 (Angptl4), mRNA [NM_199115]                                                                                                                                 | <b>5,594</b> |
| 0            | RCG40058Uncharacterized protein [Source:UniProtKB/TrEMBL;Acc:D4A9P7] [ENSRNOT00000026267]                                                                                                         | <b>5,594</b> |
| 0            | Uncharacterized protein [Source:UniProtKB/TrEMBL;Acc:D3ZVM3] [ENSRNOT00000059301]                                                                                                                 | <b>5,593</b> |
| 0            | zinc finger X-chromosomal protein [Source:RefSeq peptide;Acc:NP_001102487] [ENSRNOT00000007501]                                                                                                   | <b>5,590</b> |
| Sox18        | Rattus norvegicus SRY (sex determining region Y)-box 18 (Sox18), mRNA [NM_001024781]                                                                                                              | <b>5,590</b> |
| Slc25a12     | Rattus norvegicus similar to solute carrier family 25 (mitochondrial carrier, Aralar), member 12 (LOC362145), mRNA [XM_342445]                                                                    | <b>5,590</b> |
| Jrkl         | Rattus norvegicus jerky homolog-like (mouse) (Jrkl), mRNA [NM_001108122]                                                                                                                          | <b>5,589</b> |
| 0            | Unknown                                                                                                                                                                                           | <b>5,589</b> |
| Grb14        | Rattus norvegicus growth factor receptor bound protein 14 (Grb14), mRNA [NM_031623]                                                                                                               | <b>5,588</b> |
| Dlst         | Rattus norvegicus dihydrolipoamide S-succinyltransferase (E2 component of 2-oxo-glutarate complex) (Dlst), mRNA [NM_001006981]                                                                    | <b>5,588</b> |
| Nfil3        | Rattus norvegicus nuclear factor, interleukin 3 regulated (Nfil3), mRNA [NM_053727]                                                                                                               | <b>5,588</b> |
| 0            | Q6XUM4_9PSED (Q6XUM4) Integrase-like protein, partial (6%) [TC644955]                                                                                                                             | <b>5,588</b> |
| Eif2b1       | Rattus norvegicus eukaryotic translation initiation factor 2B, subunit 1 alpha (Eif2b1), mRNA [NM_172029]                                                                                         | <b>5,587</b> |
| 0            | Unknown                                                                                                                                                                                           | <b>5,585</b> |
| Ergic2       | Rattus norvegicus ERGIC and golgi 2 (Ergic2), mRNA [NM_001024984]                                                                                                                                 | <b>5,584</b> |
| Utp3         | Rattus norvegicus UTP3, small subunit (SSU) processome component, homolog (S. cerevisiae) (Utp3), mRNA [NM_001012036]                                                                             | <b>5,584</b> |
| 0            | Uncharacterized protein [Source:UniProtKB/TrEMBL;Acc:D3ZEA8] [ENSRNOT00000044296]                                                                                                                 | <b>5,583</b> |
| Idh1         | Rattus norvegicus isocitrate dehydrogenase 1 (NADP+), soluble (Idh1), mRNA [NM_031510]                                                                                                            | <b>5,581</b> |
| Nov          | Rattus norvegicus nephroblastoma overexpressed gene (Nov), mRNA [NM_030868]                                                                                                                       | <b>5,581</b> |
| LOC100363170 | PREDICTED: Rattus norvegicus rCG5134-like (LOC100363170), mRNA [XM_002730165]                                                                                                                     | <b>5,581</b> |
| Acat1        | Rattus norvegicus acetyl-coenzyme A acetyltransferase 1 (Acat1), nuclear gene encoding mitochondrial protein, mRNA [NM_017075]                                                                    | <b>5,580</b> |
| Smurf2       | Rattus norvegicus SMAD specific E3 ubiquitin protein ligase 2 (Smurf2), mRNA [NM_001107061]                                                                                                       | <b>5,580</b> |
| Mthfd2       | Rattus norvegicus methylenetetrahydrofolate dehydrogenase (NADP+ dependent) 2, methenyltetrahydrofolate cyclohydrolase (Mthfd2), nuclear gene encoding mitochondrial protein, mRNA [NM_001109398] | <b>5,579</b> |
| RGD1304592   | Rattus norvegicus similar to KIAA0528 protein (RGD1304592), mRNA [NM_001134581]                                                                                                                   | <b>5,578</b> |

|            |                                                                                                                               |              |
|------------|-------------------------------------------------------------------------------------------------------------------------------|--------------|
| 0          | Unknown                                                                                                                       | <b>5,578</b> |
| 0          | CB547247 AMGNNUC:SRPB2-00217-C8-A srpb2 (10220) Rattus norvegicus cDNA clone srpb2-00217-c8 5', mRNA sequence [CB547247]      | <b>5,576</b> |
| Pin1       | Rattus norvegicus peptidylprolyl cis/trans isomerase, NIMA-interacting 1 (Pin1), mRNA [NM_001106701]                          | <b>5,576</b> |
| Lims1      | Rattus norvegicus LIM and senescent cell antigen-like domains 1 (Lims1), mRNA [NM_001145456]                                  | <b>5,576</b> |
| Angpt1     | Rattus norvegicus angiopoietin 1 (Angpt1), mRNA [NM_053546]                                                                   | <b>5,576</b> |
| Lhx6       | Rattus norvegicus LIM homeobox 6 (Lhx6), mRNA [NM_001107837]                                                                  | <b>5,576</b> |
| 0          | RCG23367Uncharacterized protein [Source:UniProtKB/TrEMBL;Acc:D3ZPX0] [ENSRNOT00000047731]                                     | <b>5,575</b> |
| Vav2       | Rattus norvegicus vav 2 guanine nucleotide exchange factor (Vav2), mRNA [NM_001106563]                                        | <b>5,575</b> |
| Crisp1     | Rattus norvegicus cysteine-rich secretory protein 1 (Crisp1), mRNA [NM_022859]                                                | <b>5,574</b> |
| RGD1310269 | Rattus norvegicus hypothetical LOC314472 (RGD1310269), mRNA [NM_001126280]                                                    | <b>5,573</b> |
| Pgls       | Rattus norvegicus 6-phosphogluconolactonase (Pgls), mRNA [NM_001106066]                                                       | <b>5,573</b> |
| Capsl      | Rattus norvegicus calcyphosine-like (Capsl), mRNA [NM_001106417]                                                              | <b>5,573</b> |
| 0          | Rattus norvegicus similar to Ran-interacting protein MOG1 (LOC290273), mRNA [XM_224238]                                       | <b>5,573</b> |
| Rrm1-ps1   | PREDICTED: Rattus norvegicus similar to Ribonucleotide reductase M1 (LOC364182), miscRNA [XR_086014]                          | <b>5,572</b> |
| 0          | Uncharacterized protein [Source:UniProtKB/TrEMBL;Acc:D4ADL2] [ENSRNOT00000049830]                                             | <b>5,571</b> |
| 0          | Unknown                                                                                                                       | <b>5,571</b> |
| Cox8b      | Rattus norvegicus cytochrome c oxidase, subunit VIIIb (Cox8b), nuclear gene encoding mitochondrial protein, mRNA [NM_012786]  | <b>5,570</b> |
| Atp2c1     | Rattus norvegicus ATPase, Ca <sup>++</sup> transporting, type 2C, member 1 (Atp2c1), mRNA [NM_131907]                         | <b>5,570</b> |
| RGD1309621 | PREDICTED: Rattus norvegicus similar to hypothetical protein FLJ10652 (RGD1309621), mRNA [XM_001075984]                       | <b>5,570</b> |
| LOC288913  | Rattus norvegicus similar to LEYDIG CELL TUMOR 10 KD PROTEIN (LOC288913), mRNA [NM_198728]                                    | <b>5,569</b> |
| Ptcd1      | Rattus norvegicus pentatricopeptide repeat domain 1 (Ptcd1), nuclear gene encoding mitochondrial protein, mRNA [NM_001109665] | <b>5,568</b> |
| Lingo3     | Rattus norvegicus leucine rich repeat and Ig domain containing 3 (Lingo3), mRNA [NM_001109609]                                | <b>5,568</b> |
| Ppp1r10    | Rattus norvegicus protein phosphatase 1, regulatory subunit 10 (Ppp1r10), mRNA [NM_022951]                                    | <b>5,568</b> |
| Twf1       | Rattus norvegicus twinfilin, actin-binding protein, homolog 1 (Drosophila) (Twf1), mRNA [NM_001008521]                        | <b>5,568</b> |
| 0          | Unknown                                                                                                                       | <b>5,567</b> |
| RGD1307934 | PREDICTED: Rattus norvegicus similar to DNA segment, Chr 19, ERATO Doi 386, expressed (RGD1307934), mRNA [XM_001055620]       | <b>5,566</b> |
| LOC687516  | Unknown                                                                                                                       | <b>5,566</b> |
| Kcnj4      | Rattus norvegicus potassium inwardly-rectifying channel, subfamily J, member 4 (Kcnj4), mRNA [NM_053870]                      | <b>5,565</b> |
| Notch1     | Rattus norvegicus Notch homolog 1, translocation-associated (Drosophila) (Notch1), mRNA [NM_001105721]                        | <b>5,562</b> |
| Rapgef5    | Rattus norvegicus Rap guanine nucleotide exchange factor (GEF) 5 (Rapgef5), mRNA [NM_001047915]                               | <b>5,562</b> |
| Khynyn     | PREDICTED: Rattus norvegicus similar to mKIAA0323 protein (RGD1565688), miscRNA [XR_086021]                                   | <b>5,561</b> |
| Slc31a2    | Rattus norvegicus solute carrier family 31 (copper transporters), member 2 (Slc31a2), mRNA [NM_001033693]                     | <b>5,561</b> |
| Pgm3       | Rattus norvegicus phosphoglucomutase 3, mRNA (cDNA clone MGC:188729 IMAGE:9027278), complete cds. [BC166838]                  | <b>5,560</b> |
| Slc15a4    | Rattus norvegicus solute carrier family 15, member 4 (Slc15a4), mRNA [NM_144758]                                              | <b>5,557</b> |

|            |                                                                                                                                                                                                   |              |
|------------|---------------------------------------------------------------------------------------------------------------------------------------------------------------------------------------------------|--------------|
| 0          | RVL17833 Wackym-Soares normalized rat vestibular cDNA library Rattus norvegicus cDNA 5', mRNA sequence [DV725625]                                                                                 | <b>5,557</b> |
| 0          | Uncharacterized protein [Source:UniProtKB/TrEMBL;Acc:D3ZLA5] [ENSRNOT00000047517]                                                                                                                 | <b>5,556</b> |
| Magt1      | Rattus norvegicus magnesium transporter 1 (Magt1), mRNA [NM_053946]                                                                                                                               | <b>5,556</b> |
| Ndufs4     | Rattus norvegicus NADH dehydrogenase (ubiquinone) Fe-S protein 4 (Ndufs4), nuclear gene encoding mitochondrial protein, mRNA [NM_001025146]                                                       | <b>5,556</b> |
| RGD1565796 | Rattus norvegicus similar to RIKEN cDNA A930005I04 gene (RGD1565796), mRNA [NM_001109089]                                                                                                         | <b>5,554</b> |
| Gstm5      | Rattus norvegicus glutathione S-transferase, mu 5 (Gstm5), mRNA [NM_172038]                                                                                                                       | <b>5,554</b> |
| Nagpa      | Rattus norvegicus N-acetylglucosamine-1-phosphodiester alpha-N-acetylglucosaminidase (Nagpa), mRNA [NM_001108265]                                                                                 | <b>5,554</b> |
| 0          | Rattus norvegicus similar to Heterogeneous nuclear ribonucleoprotein A1 (Helix-destabilizing protein) (Single-strand binding protein) (hnRNP core protein A1) (HDP) (LOC312921), mRNA [XM_232629] | <b>5,553</b> |
| 0          | Unknown                                                                                                                                                                                           | <b>5,553</b> |
| 0          | Rattus norvegicus similar to 4930572L20Rik protein (LOC363857), mRNA [XM_344065]                                                                                                                  | <b>5,552</b> |
| Prmt7      | Rattus norvegicus protein arginine methyltransferase 7 (Prmt7), mRNA [NM_001014153]                                                                                                               | <b>5,552</b> |
| B4galt3    | Rattus norvegicus UDP-Gal:betaGlcNAc beta 1,4-galactosyltransferase, polypeptide 3 (B4galt3), mRNA [NM_001009539]                                                                                 | <b>5,552</b> |
| Tmem59l    | Transmembrane protein 59-like [Source:UniProtKB/Swiss-Prot;Acc:Q5HZE8] [ENSRNOT00000038139]                                                                                                       | <b>5,551</b> |
| Rap1a      | Rattus norvegicus RAP1A, member of RAS oncogene family (Rap1a), mRNA [NM_001005765]                                                                                                               | <b>5,551</b> |
| Serpine3   | Uncharacterized protein [Source:UniProtKB/TrEMBL;Acc:D4A9F7] [ENSRNOT00000051307]                                                                                                                 | <b>5,550</b> |
| Nepn       | Rattus norvegicus neprocan (Nepn), mRNA [NM_001107632]                                                                                                                                            | <b>5,549</b> |
| Spata1     | Rattus norvegicus spermatogenesis associated 1 (Spata1), mRNA [NM_001014177]                                                                                                                      | <b>5,548</b> |
| Cd300lg    | PREDICTED: Rattus norvegicus Cd300 molecule-like family member G, transcript variant 1 (Cd300lg), mRNA [XM_001061779]                                                                             | <b>5,548</b> |
| Rsl1d1     | Rattus norvegicus ribosomal L1 domain containing 1 (Rsl1d1), mRNA [NM_001008876]                                                                                                                  | <b>5,546</b> |
| Rest       | Rattus norvegicus RE1-silencing transcription factor (Rest), mRNA [NM_031788]                                                                                                                     | <b>5,546</b> |
| Veph1      | Rattus norvegicus ventricular zone expressed PH domain homolog 1 (zebrafish) (Veph1), mRNA [NM_001014171]                                                                                         | <b>5,546</b> |
| 0          | Unknown                                                                                                                                                                                           | <b>5,545</b> |
| 0          | RGD1565232 (Predicted)Uncharacterized protein [Source:UniProtKB/TrEMBL;Acc:D3ZUG5] [ENSRNOT00000066977]                                                                                           | <b>5,544</b> |
| 0          | Unknown                                                                                                                                                                                           | <b>5,544</b> |
| Ints5      | Rattus norvegicus integrator complex subunit 5 (Ints5), mRNA [NM_001107576]                                                                                                                       | <b>5,543</b> |
| Tmem129    | Rattus norvegicus transmembrane protein 129 (Tmem129), mRNA [NM_001126274]                                                                                                                        | <b>5,543</b> |
| Tdo2       | Rattus norvegicus tryptophan 2,3-dioxygenase (Tdo2), mRNA [NM_022403]                                                                                                                             | <b>5,543</b> |
| Hsp90aa1   | Rattus norvegicus heat shock protein 90, alpha (cytosolic), class A member 1 (Hsp90aa1), mRNA [NM_175761]                                                                                         | <b>5,542</b> |
| 0          | Unknown                                                                                                                                                                                           | <b>5,542</b> |
| 0          | Unknown                                                                                                                                                                                           | <b>5,542</b> |
| Grn        | Rattus norvegicus granulin (Grn), transcript variant 1, mRNA [NM_017113]                                                                                                                          | <b>5,541</b> |
| Pde4d1     | PREDICTED: Rattus norvegicus phosphodiesterase 4D, cAMP-specific-like 1 (Pde4d1), mRNA [XM_574187]                                                                                                | <b>5,540</b> |

|            |                                                                                                                                                              |       |
|------------|--------------------------------------------------------------------------------------------------------------------------------------------------------------|-------|
| Fam132a    | Rattus norvegicus family with sequence similarity 132, member A (Fam132a), mRNA [NM_001108000]                                                               | 5,540 |
| Esr2       | Rattus norvegicus estrogen receptor 2 (ER beta) (Esr2), mRNA [NM_012754]                                                                                     | 5,536 |
| Glt6d1     | Rattus norvegicus glycosyltransferase 6 domain containing 1 (Glt6d1), mRNA [NM_001106559]                                                                    | 5,536 |
| Hmgcs1     | Rattus norvegicus 3-hydroxy-3-methylglutaryl-Coenzyme A synthase 1 (soluble) (Hmgcs1), mRNA [NM_017268]                                                      | 5,535 |
| Slc12a9    | Rattus norvegicus solute carrier family 12 (potassium/chloride transporters), member 9 (Slc12a9), mRNA [NM_134405]                                           | 5,534 |
| LOC685964  | Rattus norvegicus hypothetical protein LOC685964 (LOC685964), mRNA [NM_001109489]                                                                            | 5,533 |
| Depdc5     | Rattus norvegicus DEP domain containing 5 (Depdc5), mRNA [NM_001107229]                                                                                      | 5,532 |
| LOC682206  | PREDICTED: Rattus norvegicus similar to Zinc finger protein 208 (LOC682206), mRNA [XM_001060419]                                                             | 5,532 |
| 0          | Rattus norvegicus similar to 3-phosphoglycerate dehydrogenase (LOC294985), mRNA [XM_227056]                                                                  | 5,531 |
| Adm        | Rattus norvegicus adrenomedullin (Adm), mRNA [NM_012715]                                                                                                     | 5,530 |
| Stard5     | Rattus norvegicus StAR-related lipid transfer (START) domain containing 5 (Stard5), mRNA [NM_001192011]                                                      | 5,530 |
| Vta1       | Rattus norvegicus Vps20-associated 1 homolog (S. cerevisiae) (Vta1), mRNA [NM_001025640]                                                                     | 5,529 |
| Slco1c1    | Rattus norvegicus solute carrier organic anion transporter family, member 1c1 (Slco1c1), mRNA [NM_053441]                                                    | 5,529 |
| Dync1i1    | Rattus norvegicus dynein cytoplasmic 1 intermediate chain 1 (Dync1i1), mRNA [NM_019234]                                                                      | 5,528 |
| Hapln2     | Rattus norvegicus hyaluronan and proteoglycan link protein 2 (Hapln2), mRNA [NM_022285]                                                                      | 5,528 |
| Smpd1      | Rattus norvegicus sphingomyelin phosphodiesterase 1, acid lysosomal (Smpd1), mRNA [NM_001006997]                                                             | 5,527 |
| Mrpl32     | Rattus norvegicus mitochondrial ribosomal protein L32 (Mrpl32), nuclear gene encoding mitochondrial protein, mRNA [NM_001106116]                             | 5,527 |
| Nol12      | Rattus norvegicus nucleolar protein 12 (Nol12), mRNA [NM_001012747]                                                                                          | 5,527 |
| Cdk9       | Rattus norvegicus cyclin-dependent kinase 9 (Cdk9), mRNA [NM_001007743]                                                                                      | 5,527 |
| Mpnd       | Rattus norvegicus MPN domain containing (Mpnd), mRNA [NM_001085406]                                                                                          | 5,527 |
| Ola1       | Rattus norvegicus Obg-like ATPase 1 (Ola1), mRNA [NM_001033927]                                                                                              | 5,525 |
| 0          | Unknown                                                                                                                                                      | 5,525 |
| 0          | Unknown                                                                                                                                                      | 5,524 |
| RGD1560187 | Rattus norvegicus similar to Hypothetical UPF0327 protein (RGD1560187), mRNA [NM_001173556]                                                                  | 5,524 |
| LOC690918  | Rattus norvegicus hypothetical protein LOC690918 (LOC690918), mRNA [NM_001109613]                                                                            | 5,523 |
| Akap11     | Rattus norvegicus A kinase (PRKA) anchor protein 11 (Akap11), mRNA [NM_012773]                                                                               | 5,523 |
| Zp4        | Rattus norvegicus zona pellucida glycoprotein 4 (Zp4), mRNA [NM_172330]                                                                                      | 5,523 |
| 0          | Unknown                                                                                                                                                      | 5,522 |
| RGD1560997 | PREDICTED: Rattus norvegicus similar to ribosomal protein S27a (RGD1560997), mRNA [XM_001053937]                                                             | 5,522 |
| Frmd6      | FERM domain-containing protein 6 [Source:UniProtKB/Swiss-Prot;Acc:Q8VII0] [ENSRNOT00000009610]                                                               | 5,521 |
| RGD1562601 | Uncharacterized protein [Source:UniProtKB/TrEMBL;Acc:D3ZLH3] [ENSRNOT00000048420]                                                                            | 5,521 |
| 0          | MST4_MOUSE (Q99JT2) Serine/threonine-protein kinase MST4 (STE20-like kinase MST4) (MST-4) (Mammalian STE20-like protein kinase 4) , partial (32%) [TC630882] | 5,520 |
| Znf764     | PREDICTED: Rattus norvegicus zinc finger protein 764, transcript variant 1 (Znf764), mRNA [XM_001079970]                                                     | 5,519 |

|              |                                                                                                                                                                                  |              |
|--------------|----------------------------------------------------------------------------------------------------------------------------------------------------------------------------------|--------------|
| Slc25a15     | Rattus norvegicus solute carrier family 25 (mitochondrial carrier; ornithine transporter) member 15 (Slc25a15), nuclear gene encoding mitochondrial protein, mRNA [NM_001047880] | <b>5,518</b> |
| Whsc1        | Rattus norvegicus Wolf-Hirschhorn syndrome candidate 1 (human) (Whsc1), mRNA [NM_001191552]                                                                                      | <b>5,517</b> |
| Nme7         | Rattus norvegicus non-metastatic cells 7, protein expressed in (nucleoside-diphosphate kinase) (Nme7), mRNA [NM_138532]                                                          | <b>5,517</b> |
| Abca3        | PREDICTED: Rattus norvegicus ATP-binding cassette, sub-family A (ABC1), member 3 (Abca3), mRNA [XM_220219]                                                                       | <b>5,517</b> |
| Cyp2c79      | Uncharacterized protein [Source:UniProtKB/TrEMBL;Acc:D3ZDQ1] [ENSRNOT00000017367]                                                                                                | <b>5,516</b> |
| 0            | zinc finger protein 62 Gene [Source:MGI Symbol;Acc:MGI:99662] [ENSRNOT00000003373]                                                                                               | <b>5,516</b> |
| Jakmip3      | Rattus norvegicus janus kinase and microtubule interacting protein 3 (Jakmip3), mRNA [NM_001163277]                                                                              | <b>5,516</b> |
| Tipr1        | Rattus norvegicus TIP41, TOR signaling pathway regulator-like ( <i>S. cerevisiae</i> ) (Tipr1), mRNA [NM_001109667]                                                              | <b>5,515</b> |
| Ech1         | Rattus norvegicus enoyl coenzyme A hydratase 1, peroxisomal (Ech1), mRNA [NM_022594]                                                                                             | <b>5,515</b> |
| Mrfap1       | Rattus norvegicus Mof4 family associated protein 1 (Mrfap1), mRNA [NM_001009264]                                                                                                 | <b>5,514</b> |
| Znf711       | Uncharacterized protein [Source:UniProtKB/TrEMBL;Acc:D3ZHB2] [ENSRNOT00000006237]                                                                                                | <b>5,513</b> |
| Bcl2l13      | Rattus norvegicus BCL2-like 13 (apoptosis facilitator) (Bcl2l13), nuclear gene encoding mitochondrial protein, mRNA [NM_001107885]                                               | <b>5,513</b> |
| Cox7a2l      | Rattus norvegicus cytochrome c oxidase subunit VIIa polypeptide 2 like (Cox7a2l), nuclear gene encoding mitochondrial protein, mRNA [NM_001106704]                               | <b>5,512</b> |
| Spns1        | Rattus norvegicus spinster homolog 1 ( <i>Drosophila</i> ) (Spns1), mRNA [NM_001039208]                                                                                          | <b>5,511</b> |
| Tmem171      | Rattus norvegicus transmembrane protein 171 (Tmem171), mRNA [NM_001013903]                                                                                                       | <b>5,511</b> |
| Fxc1         | Rattus norvegicus fractured callus expressed transcript 1 (Fxc1), mRNA [NM_053371]                                                                                               | <b>5,511</b> |
| Rc3h2        | Rattus norvegicus ring finger and CCCH-type zinc finger domains 2 (Rc3h2), mRNA [NM_001107839]                                                                                   | <b>5,511</b> |
| 0            | Rattus norvegicus similar to beta-actin (LOC302340), mRNA [XM_228468]                                                                                                            | <b>5,510</b> |
| 0            | Unknown                                                                                                                                                                          | <b>5,510</b> |
| LOC100364597 | PREDICTED: Rattus norvegicus 5-nucleotidase, cytosolic II-like (LOC100364597), mRNA [XM_002725789]                                                                               | <b>5,510</b> |
| 0            | Unknown                                                                                                                                                                          | <b>5,510</b> |
| RGD1560581   | PREDICTED: Rattus norvegicus similar to glyceraldehyde-3-phosphate dehydrogenase (RGD1560581), miscRNA [XR_009063]                                                               | <b>5,510</b> |
| Tal2         | Rattus norvegicus T-cell acute lymphocytic leukemia 2 (Tal2), mRNA [NM_001109462]                                                                                                | <b>5,509</b> |
| Mcoln1       | Rattus norvegicus mucolipin 1 (Mcoln1), mRNA [NM_001105903]                                                                                                                      | <b>5,509</b> |
| Ifi44        | Rattus norvegicus interferon-induced protein 44 (Ifi44), mRNA [NM_001107729]                                                                                                     | <b>5,509</b> |
| Pms2         | Rattus norvegicus PMS2 postmeiotic segregation increased 2 ( <i>S. cerevisiae</i> ) (Pms2), mRNA [NM_001105908]                                                                  | <b>5,508</b> |
| 0            | Unknown                                                                                                                                                                          | <b>5,508</b> |
| Ccdc27       | Rattus norvegicus coiled-coil domain containing 27 (Ccdc27), mRNA [NM_001191063]                                                                                                 | <b>5,507</b> |
| Kat3         | Rattus norvegicus kynurenine aminotransferase III (Kat3), mRNA [NM_001015037]                                                                                                    | <b>5,507</b> |
| Cdc14a       | Rattus norvegicus CDC14 cell division cycle 14 homolog A ( <i>S. cerevisiae</i> ) (Cdc14a), transcript variant 2, mRNA [NM_001107718]                                            | <b>5,507</b> |
| 0            | Unknown                                                                                                                                                                          | <b>5,506</b> |
| LOC691975    | PREDICTED: Rattus norvegicus similar to 40S ribosomal protein S17 (LOC691975), mRNA [XM_001080507]                                                                               | <b>5,506</b> |



|              |                                                                                                                                                   |       |
|--------------|---------------------------------------------------------------------------------------------------------------------------------------------------|-------|
| 0            | Unknown                                                                                                                                           | 5,505 |
| Kif5b        | Rattus norvegicus kinesin family member 5B (Kif5b), mRNA [NM_057202]                                                                              | 5,505 |
| RGD1561667   | PREDICTED: Rattus norvegicus similar to putative protein kinase (RGD1561667), mRNA [XM_001054195]                                                 | 5,505 |
| Abo2         | Rattus norvegicus histo-blood group ABO system transferase 2 (Abo2), mRNA [NM_001160263]                                                          | 5,502 |
| Taf1b        | Rattus norvegicus TATA box binding protein (Tbp)-associated factor, RNA polymerase I, B (Taf1b), mRNA [NM_001191107]                              | 5,502 |
| Rage         | Rattus norvegicus renal tumor antigen (Rage), mRNA [NM_001010965]                                                                                 | 5,501 |
| Kif26b       | Rattus norvegicus kinesin family member 26B (Kif26b), mRNA [NM_001109079]                                                                         | 5,501 |
| Rpl39        | Rattus norvegicus ribosomal protein L39 (Rpl39), mRNA [NM_012875]                                                                                 | 5,499 |
| Nars         | Rattus norvegicus asparaginyl-tRNA synthetase (Nars), transcript variant 1, mRNA [NM_001025635]                                                   | 5,497 |
| Slc25a37     | Rattus norvegicus solute carrier family 25, member 37 (Slc25a37), nuclear gene encoding mitochondrial protein, mRNA [NM_001013996]                | 5,497 |
| 0            | Unknown                                                                                                                                           | 5,496 |
| Olr1867      | Rattus norvegicus olfactory receptor 1867 (Olr1867), mRNA [NM_001101022]                                                                          | 5,495 |
| LOC681153    | PREDICTED: Rattus norvegicus hypothetical protein LOC681153 (LOC681153), mRNA [XM_001060542]                                                      | 5,494 |
| LOC687121    | PREDICTED: Rattus norvegicus similar to Shc SH2-domain binding protein 1 (LOC687121), mRNA [XM_001077162]                                         | 5,493 |
| Suds3        | Uncharacterized protein [Source:UniProtKB/TrEMBL;Acc:D3ZYN5] [ENSRNOT0000001504]                                                                  | 5,490 |
| Kctd19       | PREDICTED: Rattus norvegicus potassium channel tetramerisation domain containing 19 (Kctd19), mRNA [XM_001075666]                                 | 5,489 |
| Nop56        | Rattus norvegicus NOP56 ribonucleoprotein homolog (yeast) (Nop56), mRNA [NM_001025732]                                                            | 5,489 |
| 0            | Rattus norvegicus TL0ABA3YL04 mRNA sequence. [FQ209772]                                                                                           | 5,489 |
| Ndufb7       | Rattus norvegicus NADH dehydrogenase (ubiquinone) 1 beta subcomplex, 7 (Ndufb7), nuclear gene encoding mitochondrial protein, mRNA [NM_001108442] | 5,488 |
| Aph1b        | Rattus norvegicus anterior pharynx defective 1 homolog B (C. elegans) (Aph1b), mRNA [NM_001047090]                                                | 5,487 |
| 0            | PREDICTED: Rattus norvegicus similar to Multisynthetase complex auxiliary component p43 (LOC365837), miscRNA [XR_005797]                          | 5,487 |
| Dhx35        | Rattus norvegicus DEAH (Asp-Glu-Ala-His) box polypeptide 35 (Dhx35), mRNA [NM_001108601]                                                          | 5,486 |
| 0            | Rattus norvegicus TL0ADA52YC03 mRNA sequence. [FQ228753]                                                                                          | 5,486 |
| Eml4         | Rattus norvegicus echinoderm microtubule associated protein like 4 (Eml4), mRNA [NM_001108008]                                                    | 5,486 |
| Nolc1        | Rattus norvegicus nucleolar and coiled-body phosphoprotein 1 (Nolc1), mRNA [NM_022869]                                                            | 5,485 |
| LOC100233176 | Rattus norvegicus hypothetical protein LOC100233176 (LOC100233176), transcript variant 1, mRNA [NM_001142941]                                     | 5,484 |
| RGD1308299   | Rattus norvegicus similar to chromosome 6 open reading frame 130 (RGD1308299), mRNA [NM_001134596]                                                | 5,483 |
| Accn4        | Rattus norvegicus amiloride-sensitive cation channel 4, pituitary (Accn4), mRNA [NM_022234]                                                       | 5,483 |
| Ppp5c        | Rattus norvegicus protein phosphatase 5, catalytic subunit (Ppp5c), mRNA [NM_031729]                                                              | 5,482 |
| Dse          | Rattus norvegicus dermatan sulfate epimerase (Dse), mRNA [NM_001108933]                                                                           | 5,482 |
| Msln1        | Uncharacterized protein [Source:UniProtKB/TrEMBL;Acc:D4AB62] [ENSRNOT00000060286]                                                                 | 5,482 |
| Psmc3ip      | Rattus norvegicus PSMC3 interacting protein (Psmc3ip), mRNA [NM_134458]                                                                           | 5,481 |
| Erc2         | Rattus norvegicus ELKS/RAB6-interacting/CAST family member 2 (Erc2), mRNA [NM_170787]                                                             | 5,480 |

|              |                                                                                                                    |              |
|--------------|--------------------------------------------------------------------------------------------------------------------|--------------|
| Amt          | Rattus norvegicus aminomethyltransferase (Amt), nuclear gene encoding mitochondrial protein, mRNA [NM_001014004]   | <b>5,479</b> |
| Hip1r        | Rattus norvegicus huntingtin interacting protein 1 related (Hip1r), transcript variant 1, mRNA [NM_001134763]      | <b>5,478</b> |
| Cog6         | Rattus norvegicus component of oligomeric golgi complex 6 (Cog6), mRNA [NM_001004262]                              | <b>5,478</b> |
| Qrich2       | Uncharacterized protein [Source:UniProtKB/TrEMBL;Acc:D3ZG97] [ENSRNOT00000034817]                                  | <b>5,477</b> |
| LOC685544    | Rattus norvegicus hypothetical protein LOC685544 (LOC685544), mRNA [NM_001109474]                                  | <b>5,477</b> |
| Krtap16-5    | Rattus norvegicus keratin associated protein 16-5 (Krtap16-5), mRNA [NM_001109424]                                 | <b>5,477</b> |
| RGD1305679   | Rattus norvegicus similar to 9530008L14Rik protein (RGD1305679), mRNA [NM_001014144]                               | <b>5,476</b> |
| Olr1387      | Rattus norvegicus olfactory receptor 1387 (Olr1387), mRNA [NM_001000001]                                           | <b>5,475</b> |
| Pld3         | Rattus norvegicus phospholipase D family, member 3 (Pld3), mRNA [NM_001012167]                                     | <b>5,474</b> |
| Slc22a25     | Rattus norvegicus solute carrier family 22, member 25 (Slc22a25), mRNA [NM_138908]                                 | <b>5,474</b> |
| Cd99l2       | Rattus norvegicus CD99 molecule-like 2 (Cd99l2), mRNA [NM_134459]                                                  | <b>5,474</b> |
| Evc2         | Rattus norvegicus Ellis van Creveld syndrome 2 homolog (human) (Evc2), mRNA [NM_001106012]                         | <b>5,473</b> |
| 0            | Uncharacterized protein [Source:UniProtKB/TrEMBL;Acc:D3ZH87] [ENSRNOT00000047160]                                  | <b>5,473</b> |
| Cnst         | Uncharacterized protein [Source:UniProtKB/TrEMBL;Acc:D3ZKK3] [ENSRNOT0000003641]                                   | <b>5,472</b> |
| Ccdc99       | Rattus norvegicus coiled-coil domain containing 99 (Ccdc99), mRNA [NM_001034138]                                   | <b>5,472</b> |
| Fshb         | Rattus norvegicus follicle stimulating hormone, beta polypeptide (Fshb), mRNA [NM_001007597]                       | <b>5,472</b> |
| Atg2a        | Rattus norvegicus ATG2 autophagy related 2 homolog A (S. cerevisiae) (Atg2a), mRNA [NM_001109545]                  | <b>5,471</b> |
| LOC100364718 | PREDICTED: Rattus norvegicus myeloid/lymphoid or mixed-lineage leukemia 3-like (LOC100364718), mRNA [XM_002726310] | <b>5,471</b> |
| Xab2         | Rattus norvegicus XPA binding protein 2 (Xab2), mRNA [NM_139109]                                                   | <b>5,471</b> |
| Ero1lb       | Rattus norvegicus ERO1-like beta (S. cerevisiae) (Ero1lb), mRNA [NM_001191893]                                     | <b>5,470</b> |
| 0            | Unknown                                                                                                            | <b>5,469</b> |
| 0            | Unknown                                                                                                            | <b>5,469</b> |
| 0            | Unknown                                                                                                            | <b>5,468</b> |
| Hsp90ab1     | Rattus norvegicus heat shock protein 90 alpha (cytosolic), class B member 1 (Hsp90ab1), mRNA [NM_001004082]        | <b>5,468</b> |
| RGD1309906   | Rattus norvegicus similar to RIKEN cDNA 2310004I24 gene (RGD1309906), mRNA [NM_001009246]                          | <b>5,468</b> |
| 0            | Uncharacterized protein [Source:UniProtKB/TrEMBL;Acc:D3ZVD4] [ENSRNOT00000020523]                                  | <b>5,467</b> |
| 0            | Rattus norvegicus TL0ABA20YK18 mRNA sequence. [FQ210882]                                                           | <b>5,467</b> |
| Fahd2a       | Rattus norvegicus fumarylacetoacetate hydrolase domain containing 2A (Fahd2a), mRNA [NM_001134834]                 | <b>5,466</b> |
| LOC314328    | Rattus norvegicus similar to chromosome 14 open reading frame 166B (LOC314328), mRNA [NM_001037783]                | <b>5,466</b> |
| Rsl24d1      | Rattus norvegicus ribosomal L24 domain containing 1 (Rsl24d1), mRNA [NM_001014212]                                 | <b>5,466</b> |
| Aadacl3      | Rattus norvegicus arylacetamide deacetylase-like 3 (Aadacl3), mRNA [NM_001191768]                                  | <b>5,465</b> |
| Olr567       | Rattus norvegicus olfactory receptor 567 (Olr567), mRNA [NM_001000326]                                             | <b>5,465</b> |
| Slpil2       | Rattus norvegicus antileukoproteinase-like 2 (Slpil2), mRNA [NM_001008872]                                         | <b>5,465</b> |
| 0            | LRRGT00148 [Source:UniProtKB/TrEMBL;Acc:Q6QI60] [ENSRNOT00000058693]                                               | <b>5,464</b> |

|            |                                                                                                                                                 |       |
|------------|-------------------------------------------------------------------------------------------------------------------------------------------------|-------|
| Cox7b      | Rattus norvegicus cytochrome c oxidase subunit VIIb (Cox7b), nuclear gene encoding mitochondrial protein, mRNA [NM_182819]                      | 5,463 |
| Cdc6       | Rattus norvegicus cell division cycle 6 homolog ( <i>S. cerevisiae</i> ) (Cdc6), mRNA [NM_001108298]                                            | 5,462 |
| Fbp2       | Rattus norvegicus fructose-1,6-bisphosphatase 2 (Fbp2), mRNA [NM_053716]                                                                        | 5,462 |
| 0          | Unknown                                                                                                                                         | 5,459 |
| RGD1563996 | PREDICTED: Rattus norvegicus similar to Protein UNQ9166/PRO28631 precursor (RGD1563996), mRNA [XM_001077526]                                    | 5,458 |
| Mrps14     | Rattus norvegicus mitochondrial ribosomal protein S14 (Mrps14), nuclear gene encoding mitochondrial protein, mRNA [NM_001105963]                | 5,458 |
| Lnx2       | Rattus norvegicus ligand of numb-protein X 2 (Lnx2), mRNA [NM_001108329]                                                                        | 5,458 |
| Tbrg4      | Rattus norvegicus transforming growth factor beta regulator 4 (Tbrg4), mRNA [NM_001012154]                                                      | 5,457 |
| 0          | Unknown                                                                                                                                         | 5,455 |
| Tmem199    | Rattus norvegicus transmembrane protein 199 (Tmem199), mRNA [NM_001024992]                                                                      | 5,454 |
| Egf        | Rattus norvegicus epidermal growth factor (Egf), mRNA [NM_012842]                                                                               | 5,454 |
| Pcdhb9     | Rattus norvegicus protocadherin beta 9 (Pcdhb9), mRNA [NM_001109390]                                                                            | 5,453 |
| Brp44l     | Rattus norvegicus brain protein 44-like (Brp44l), mRNA [NM_133561]                                                                              | 5,453 |
| 0          | Unknown                                                                                                                                         | 5,452 |
| Rab21      | Rattus norvegicus RAB21, member RAS oncogene family (Rab21), mRNA [NM_001004238]                                                                | 5,451 |
| Tmod3      | Rattus norvegicus tropomodulin 3 (Tmod3), mRNA [NM_001011997]                                                                                   | 5,449 |
| Btg1       | Rattus norvegicus B-cell translocation gene 1, anti-proliferative (Btg1), mRNA [NM_017258]                                                      | 5,448 |
| Vav3       | Rattus norvegicus vav 3 guanine nucleotide exchange factor (Vav3), mRNA [NM_001191714]                                                          | 5,447 |
| 0          | Unknown                                                                                                                                         | 5,446 |
| Spsb4      | Rattus norvegicus splA/ryanodine receptor domain and SOCS box containing 4 (Spsb4), mRNA [NM_001106849]                                         | 5,446 |
| Actr1a     | Rattus norvegicus ARP1 actin-related protein 1 homolog A, centractin alpha (yeast) (Actr1a), mRNA [NM_001106364]                                | 5,446 |
| Slc6a20    | Rattus norvegicus solute carrier family 6 (proline IMINO transporter), member 20 (Slc6a20), mRNA [NM_133296]                                    | 5,445 |
| Nog        | Rattus norvegicus noggin (Nog), mRNA [NM_012990]                                                                                                | 5,445 |
| LOC690422  | PREDICTED: Rattus norvegicus hypothetical protein LOC690422, transcript variant 2 (LOC690422), mRNA [XM_001072932]                              | 5,444 |
| 0          | Unknown                                                                                                                                         | 5,442 |
| LOC690386  | Rattus norvegicus hypothetical protein LOC690386 (LOC690386), mRNA [NM_001109586]                                                               | 5,442 |
| 0          | Histone H4Osteogenic growth peptide [Source:UniProtKB/Swiss-Prot;Acc:P62804] [ENSRNOT00000049464]                                               | 5,441 |
| 0          | Unknown                                                                                                                                         | 5,441 |
| LOC682666  | PREDICTED: Rattus norvegicus hypothetical protein LOC682666 (LOC682666), mRNA [XM_002728534]                                                    | 5,441 |
| Aqp1       | Rattus norvegicus aquaporin 1 (Aqp1), mRNA [NM_012778]                                                                                          | 5,441 |
| 0          | Serine/threonine-protein kinase TAO2 [Source:UniProtKB/Swiss-Prot;Acc:Q9JLS3] [ENSRNOT00000055018]                                              | 5,441 |
| LOC363337  | Rattus norvegicus similar to RIKEN cDNA 1700081O22 (LOC363337), mRNA [NM_001014221]                                                             | 5,440 |
| Serf1      | Similar to small EDRK-rich factor 1 (Predicted), isoform CRA_aUncharacterized protein [Source:UniProtKB/TrEMBL;Acc:D3ZDW2] [ENSRNOT00000024291] | 5,440 |

|            |                                                                                                                                                  |       |
|------------|--------------------------------------------------------------------------------------------------------------------------------------------------|-------|
| RGD1306917 | Rattus norvegicus similar to RIKEN cDNA 2900010M23 (RGD1306917), mRNA [NM_001108528]                                                             | 5,440 |
| Smarcd2    | Rattus norvegicus SWI/SNF related, matrix associated, actin dependent regulator of chromatin, subfamily d, member 2 (Smarcd2), mRNA [NM_031983]  | 5,440 |
| Igfbp6     | Rattus norvegicus insulin-like growth factor binding protein 6 (Igfbp6), mRNA [NM_013104]                                                        | 5,438 |
| Abcb1b     | Rattus norvegicus ATP-binding cassette, subfamily B (MDR/TAP), member 1B (Abcb1b), mRNA [NM_012623]                                              | 5,438 |
| Lrrc55     | Rattus norvegicus leucine rich repeat containing 55 (Lrrc55), mRNA [NM_001122975]                                                                | 5,437 |
| Olr1169    | Rattus norvegicus olfactory receptor 1169 (Olr1169), mRNA [NM_001000434]                                                                         | 5,437 |
| 0          | Unknown                                                                                                                                          | 5,437 |
| 0          | Unknown                                                                                                                                          | 5,437 |
| 0          | Unknown                                                                                                                                          | 5,436 |
| RGD1304719 | Rattus norvegicus similar to RIKEN cDNA 2810002N01 (RGD1304719), mRNA [NM_001037769]                                                             | 5,436 |
| Bclaf1     | Rattus norvegicus BCL2-associated transcription factor 1 (Bclaf1), mRNA [NM_001047852]                                                           | 5,436 |
| Tgs1       | Rattus norvegicus trimethylguanosine synthase homolog (S. cerevisiae) (Tgs1), mRNA [NM_001107904]                                                | 5,436 |
| Olr153     | Rattus norvegicus olfactory receptor 153 (Olr153), mRNA [NM_001000167]                                                                           | 5,436 |
| 0          | Unknown                                                                                                                                          | 5,435 |
| 0          | Nipped-B homolog (Drosophila)Uncharacterized protein [Source:UniProtKB/TrEMBL;Acc:D3ZG77] [ENSRNOT00000021181]                                   | 5,433 |
| Mosc2      | Rattus norvegicus MOCO sulphurase C-terminal domain containing 2 (Mosc2), mRNA [NM_134410]                                                       | 5,433 |
| Mafk       | Rattus norvegicus v-maf musculoaponeurotic fibrosarcoma oncogene homolog K (avian) (Mafk), mRNA [NM_145673]                                      | 5,433 |
| RGD1563975 | Rattus norvegicus similar to testis expressed sequence 13B (RGD1563975), mRNA [NM_001195270]                                                     | 5,432 |
| 0          | Unknown                                                                                                                                          | 5,431 |
| Cage1      | Rattus norvegicus cancer antigen 1 (Cage1), mRNA [NM_001012052]                                                                                  | 5,431 |
| 0          | Rattus norvegicus similar to GLE1-like, RNA export mediator; GLE1 (yeast homolog)-like, RNA export mediator; hGLE1 (LOC299220), mRNA [XM_234444] | 5,431 |
| Hsph1      | Rattus norvegicus heat shock 105/110 protein 1 (Hsph1), mRNA [NM_001011901]                                                                      | 5,429 |
| 0          | PREDICTED: Rattus norvegicus hypothetical protein LOC100363159 (LOC100363159), mRNA [XM_002728167]                                               | 5,428 |
| 0          | Unknown                                                                                                                                          | 5,428 |
| Prpf8      | Rattus norvegicus PRP8 pre-mRNA processing factor 8 homolog (S. cerevisiae) (Prpf8), mRNA [NM_001191590]                                         | 5,427 |
| Apbb3      | Rattus norvegicus amyloid beta (A4) precursor protein-binding, family B, member 3 (Apbb3), mRNA [NM_053957]                                      | 5,426 |
| 0          | USE1_MOUSE (Q9CQ56) USE1-like protein (D12 protein), partial (69%) [TC603663]                                                                    | 5,426 |
| Thns1      | Rattus norvegicus threonine synthase-like 1 (S. cerevisiae) (Thns1), mRNA [NM_001025035]                                                         | 5,426 |
| Zrsr1      | Rattus norvegicus zinc finger (CCCH type), RNA binding motif and serine/arginine rich 1 (Zrsr1), mRNA [NM_001017504]                             | 5,425 |
| 0          | Uncharacterized protein [Source:UniProtKB/TrEMBL;Acc:D3ZG84] [ENSRNOT00000005064]                                                                | 5,422 |
| 0          | Unknown                                                                                                                                          | 5,422 |
| Mblac1     | Rattus norvegicus metallo-beta-lactamase domain containing 1 (Mblac1), mRNA [NM_001024996]                                                       | 5,421 |

|              |                                                                                                                   |       |
|--------------|-------------------------------------------------------------------------------------------------------------------|-------|
| Sfrs1        | Rattus norvegicus splicing factor, arginine/serine-rich 1 (Sfrs1), mRNA [NM_001109552]                            | 5,421 |
| LOC361985    | Rattus norvegicus similar to NICE-3 (LOC361985), mRNA [NM_001014174]                                              | 5,421 |
| Zfyve27      | Rattus norvegicus zinc finger, FYVE domain containing 27 (Zfyve27), mRNA [NM_199104]                              | 5,420 |
| 0            | Uncharacterized protein [Source:UniProtKB/TrEMBL;Acc:D3ZH07] [ENSRNOT00000049215]                                 | 5,420 |
| Ftsj1        | Uncharacterized protein [Source:UniProtKB/TrEMBL;Acc:D3ZZA1] [ENSRNOT00000006365]                                 | 5,420 |
| Sult2b1      | Rattus norvegicus sulfotransferase family, cytosolic, 2B, member 1 (Sult2b1), mRNA [NM_001039665]                 | 5,420 |
| 0            | 40S ribosomal protein S8 [Source:UniProtKB/TrEMBL;Acc:D3ZT31] [ENSRNOT00000001785]                                | 5,420 |
| 0            | Unknown                                                                                                           | 5,420 |
| 0            | similar to CDNA sequence BC017647 (RGD1566149), mRNA [Source:RefSeq DNA;Acc:NM_001109038] [ENSRNOT00000045107]    | 5,419 |
| 0            | Unknown                                                                                                           | 5,419 |
| LOC100360919 | Rattus norvegicus Immunoglobulin lambda-like polypeptide 1-like (LOC100360919), mRNA [NM_001190341]               | 5,419 |
| Csgalnact2   | Rattus norvegicus chondroitin sulfate N-acetylgalactosaminyltransferase 2 (Csgalnact2), mRNA [NM_001106616]       | 5,418 |
| Afg3l2       | Rattus norvegicus AFG3(ATPase family gene 3)-like 2 (yeast) (Afg3l2), mRNA [NM_001134864]                         | 5,418 |
| Rpl27        | Rattus norvegicus ribosomal protein L27 (Rpl27), mRNA [NM_022514]                                                 | 5,417 |
| Pds5a        | Rattus norvegicus PDS5, regulator of cohesion maintenance, homolog A (S. cerevisiae) (Pds5a), mRNA [NM_001083624] | 5,417 |
| Tlk2         | Rattus norvegicus tousled-like kinase 2 (Tlk2), mRNA [NM_001191652]                                               | 5,416 |
| 0            | Unknown                                                                                                           | 5,415 |
| 0            | Unknown                                                                                                           | 5,414 |
| 0            | ZN364_MOUSE (Q9D0C1) Zinc finger protein 364 (Rabring 7), partial (82%) [TC589182]                                | 5,414 |
| Ccpg1        | Rattus norvegicus cell cycle progression 1 (Ccpg1), mRNA [NM_001108770]                                           | 5,413 |
| RGD1309779   | Rattus norvegicus similar to ENSANGP00000021391 (RGD1309779), mRNA [NM_001108766]                                 | 5,413 |
| 0            | Unknown                                                                                                           | 5,413 |
| 0            | PREDICTED: Rattus norvegicus similar to peptide deformylase-like protein (LOC690214), mRNA [XM_001073696]         | 5,412 |
| 0            | Unknown                                                                                                           | 5,411 |
| Tnfrsf25     | Rattus norvegicus tumor necrosis factor receptor superfamily, member 25 (Tnfrsf25), mRNA [NM_001137644]           | 5,410 |
| Cdk105       | Rattus norvegicus CDK105 protein (Cdk105), mRNA [NM_134415]                                                       | 5,410 |
| Tmem147      | Rattus norvegicus transmembrane protein 147 (Tmem147), mRNA [NM_001038494]                                        | 5,408 |
| 0            | Unknown                                                                                                           | 5,408 |
| Eapp         | Rattus norvegicus E2F-associated phosphoprotein (Eapp), transcript variant 1, mRNA [NM_001134987]                 | 5,407 |
| RGD1564338   | PREDICTED: Rattus norvegicus similar to aminoacylase 1 (RGD1564338), mRNA [XM_346293]                             | 5,407 |
| Rpl12        | Uncharacterized protein [Source:UniProtKB/TrEMBL;Acc:D3ZJE2] [ENSRNOT00000003002]                                 | 5,407 |
| Ccdc82       | Rattus norvegicus coiled-coil domain containing 82 (Ccdc82), mRNA [NM_001007660]                                  | 5,406 |
| 0            | Uncharacterized protein [Source:UniProtKB/TrEMBL;Acc:D3ZG02] [ENSRNOT000000029178]                                | 5,406 |
| Zfp280b      | Rattus norvegicus zinc finger protein 280b (Zfp280b), mRNA [NM_001106384]                                         | 5,405 |

|              |                                                                                                                                         |       |
|--------------|-----------------------------------------------------------------------------------------------------------------------------------------|-------|
| Cecr5        | Rattus norvegicus cat eye syndrome chromosome region, candidate 5 homolog (human) (Cecr5), mRNA [NM_001107884]                          | 5,404 |
| 0            | Rattus norvegicus similar to ribosomal protein S15 (LOC295574), mRNA [XM_227850]                                                        | 5,403 |
| Clpp         | PREDICTED: Rattus norvegicus ClpP caseinolytic peptidase, ATP-dependent, proteolytic subunit homolog (E. coli) (Clpp), mRNA [XM_217313] | 5,403 |
| Fbxl2        | PREDICTED: Rattus norvegicus F-box and leucine-rich repeat protein 2 (Fbxl2), mRNA [XM_001076670]                                       | 5,403 |
| 0            | Rattus norvegicus similar to RIKEN cDNA 1700039A02 (LOC363397), mRNA [XM_343727]                                                        | 5,403 |
| Akap10       | Rattus norvegicus A kinase (PRKA) anchor protein 10 (Akap10), nuclear gene encoding mitochondrial protein, mRNA [NM_001114606]          | 5,403 |
| 0            | Uncharacterized protein [Source:UniProtKB/TrEMBL;Acc:D3ZY83] [ENSRNOT00000033315]                                                       | 5,403 |
| Prr11        | Rattus norvegicus proline rich 11 (Prr11), mRNA [NM_001108287]                                                                          | 5,403 |
| 0            | Natural resistance-associated macrophage protein 2 [Source:UniProtKB/Swiss-Prot;Acc:O54902] [ENSRNOT00000026494]                        | 5,402 |
| Trmt5        | Rattus norvegicus TRM5 tRNA methyltransferase 5 homolog (S. cerevisiae) (Trmt5), mRNA [NM_001108713]                                    | 5,402 |
| 0            | Uncharacterized protein [Source:UniProtKB/TrEMBL;Acc:D3ZNV0] [ENSRNOT00000064946]                                                       | 5,402 |
| LOC497978    | Rattus norvegicus similar to diacylglycerol kinase epsilon (LOC497978), mRNA [NM_001039341]                                             | 5,402 |
| Mospd1       | Rattus norvegicus motile sperm domain containing 1 (Mospd1), mRNA [NM_001014107]                                                        | 5,401 |
| RGD1563835   | 60S ribosomal protein L27 [Source:UniProtKB/TrEMBL;Acc:D3ZTK5] [ENSRNOT00000042756]                                                     | 5,401 |
| Cald1        | Rattus norvegicus caldesmon 1 (Cald1), mRNA [NM_013146]                                                                                 | 5,401 |
| Gba2         | Rattus norvegicus glucosidase beta 2 (Gba2), mRNA [NM_001013091]                                                                        | 5,400 |
| Crygs        | Rattus norvegicus crystallin, gamma S (Crygs), mRNA [NM_001109553]                                                                      | 5,399 |
| Car6         | Rattus norvegicus carbonic anhydrase 6 (Car6), mRNA [NM_001134841]                                                                      | 5,399 |
| 0            | Unknown                                                                                                                                 | 5,399 |
| 0            | RVL17674 Wackym-Soares normalized rat vestibular cDNA library Rattus norvegicus cDNA 5', mRNA sequence [DV725494]                       | 5,399 |
| 0            | Unknown                                                                                                                                 | 5,398 |
| 0            | Unknown                                                                                                                                 | 5,397 |
| 0            | Unknown                                                                                                                                 | 5,397 |
| Rnf103       | Rattus norvegicus ring finger protein 103 (Rnf103), mRNA [NM_053438]                                                                    | 5,395 |
| 0            | Unknown                                                                                                                                 | 5,394 |
| Tysnd1       | Rattus norvegicus trypsin domain containing 1 (Tysnd1), mRNA [NM_001108932]                                                             | 5,394 |
| Hist1h2af    | Rattus norvegicus histone cluster 1, H2af (Hist1h2af), mRNA [NM_001024282]                                                              | 5,391 |
| 0            | Unknown                                                                                                                                 | 5,391 |
| Mrps18c      | Rattus norvegicus mitochondrial ribosomal protein S18C (Mrps18c), nuclear gene encoding mitochondrial protein, mRNA [NM_001105996]      | 5,390 |
| Mesdc2       | Rattus norvegicus mesoderm development candidate 2 (Mesdc2), mRNA [NM_001008345]                                                        | 5,389 |
| Tradd        | Rattus norvegicus TNFRSF1A-associated via death domain (Tradd), mRNA [NM_001100480]                                                     | 5,388 |
| Alg6         | Rattus norvegicus asparagine-linked glycosylation 6, alpha-1,3-glucosyltransferase homolog (S. cerevisiae) (Alg6), mRNA [NM_001033709]  | 5,388 |
| LOC100361629 | Uncharacterized protein [Source:UniProtKB/TrEMBL;Acc:D4A202] [ENSRNOT00000061017]                                                       | 5,387 |
| Mkx          | Iroquois homeobox protein-like 1 (Predicted)Uncharacterized protein [Source:UniProtKB/TrEMBL;Acc:D3ZUL2] [ENSRNOT00000025623]           | 5,386 |

|            |                                                                                                                                                |       |
|------------|------------------------------------------------------------------------------------------------------------------------------------------------|-------|
| Psap       | Rattus norvegicus prosaposin (Psap), transcript variant 1, mRNA [NM_013013]                                                                    | 5,385 |
| RGD1311269 | Rattus norvegicus similar to hypothetical protein FLJ37953 (RGD1311269), transcript variant 1, mRNA [NM_001170473]                             | 5,385 |
| Sc65       | Rattus norvegicus synaptonemal complex protein SC65 (Sc65), mRNA [NM_021581]                                                                   | 5,385 |
| Klhl2      | PREDICTED: Rattus norvegicus kelch-like 2, Mayven (Drosophila) (Klhl2), mRNA [XM_001073589]                                                    | 5,384 |
| Dynlrb2    | Rattus norvegicus dynein light chain roadblock-type 2 (Dynlrb2), mRNA [NM_001108451]                                                           | 5,384 |
| Orc4l      | Rattus norvegicus origin recognition complex, subunit 4-like (yeast) (Orc4l), mRNA [NM_199092]                                                 | 5,384 |
| Ttf2       | Rattus norvegicus transcription termination factor, RNA polymerase II (Ttf2), mRNA [NM_001106454]                                              | 5,383 |
| Spon2      | Rattus norvegicus spondin 2, extracellular matrix protein (Spon2), mRNA [NM_138533]                                                            | 5,382 |
| Lrrcc1     | Rattus norvegicus leucine rich repeat and coiled-coil domain containing 1 (Lrrcc1), mRNA [NM_001100645]                                        | 5,382 |
| Canx       | Rattus norvegicus calnexin (Canx), mRNA [NM_172008]                                                                                            | 5,382 |
| Acot3      | Rattus norvegicus acyl-CoA thioesterase 3 (Acot3), mRNA [NM_001108041]                                                                         | 5,382 |
| 0          | Q69Z61_MOUSE (Q69Z61) MKIAA1935 protein (Fragment), partial (13%) [TC582589]                                                                   | 5,381 |
| Pck2       | Rattus norvegicus phosphoenolpyruvate carboxykinase 2 (mitochondrial) (Pck2), nuclear gene encoding mitochondrial protein, mRNA [NM_001108377] | 5,380 |
| Htr2a      | Rattus norvegicus 5-hydroxytryptamine (serotonin) receptor 2A (Htr2a), mRNA [NM_017254]                                                        | 5,380 |
| Serinc1    | Rattus norvegicus serine incorporator 1 (Serinc1), mRNA [NM_182951]                                                                            | 5,379 |
| Rab3il1    | Rattus norvegicus RAB3A interacting protein (rabin3)-like 1 (Rab3il1), mRNA [NM_134411]                                                        | 5,378 |
| 0          | Unknown                                                                                                                                        | 5,378 |
| Asmt       | Rattus norvegicus acetylserotonin O-methyltransferase (Asmt), mRNA [NM_144759]                                                                 | 5,377 |
| RGD1565459 | Uncharacterized protein [Source:UniProtKB/TrEMBL;Acc:D3ZXK6] [ENSRNOT00000042056]                                                              | 5,377 |
| Usf1       | Rattus norvegicus upstream transcription factor 1 (Usf1), mRNA [NM_031777]                                                                     | 5,376 |
| Mypn       | Rattus norvegicus myopalladin (Mypn), mRNA [NM_001107628]                                                                                      | 5,376 |
| Epha10     | Rattus norvegicus EPH receptor A10 (Epha10), mRNA [NM_001135709]                                                                               | 5,375 |
| 0          | Unknown                                                                                                                                        | 5,375 |
| Pcgf6      | Rattus norvegicus polycomb group ring finger 6 (Pcgf6), mRNA [NM_001013154]                                                                    | 5,375 |
| Tcfe2a     | Rattus norvegicus transcription factor E2a (Tcfe2a), transcript variant 1, mRNA [NM_133524]                                                    | 5,374 |
| Cd3eap     | Rattus norvegicus CD3e molecule, epsilon associated protein (Cd3eap), mRNA [NM_001109416]                                                      | 5,374 |
| 0          | Unknown                                                                                                                                        | 5,374 |
| Stk38l     | Rattus norvegicus serine/threonine kinase 38 like (Stk38l), mRNA [NM_001083336]                                                                | 5,374 |
| Elfn1      | Rattus norvegicus extracellular leucine-rich repeat and fibronectin type III domain containing 1 (Elfn1), mRNA [NM_001105913]                  | 5,372 |
| Cep152     | PREDICTED: Rattus norvegicus centrosomal protein 152 (Cep152), mRNA [XM_002726171]                                                             | 5,371 |
| Timeless   | Rattus norvegicus timeless homolog (Drosophila) (Timeless), mRNA [NM_031340]                                                                   | 5,370 |
| Mrpl3      | Rattus norvegicus mitochondrial ribosomal protein L3 (Mrpl3), nuclear gene encoding mitochondrial protein, mRNA [NM_001106852]                 | 5,370 |
| Padi3      | Rattus norvegicus peptidyl arginine deiminase, type III (Padi3), mRNA [NM_017230]                                                              | 5,370 |

|            |                                                                                                                                                         |              |
|------------|---------------------------------------------------------------------------------------------------------------------------------------------------------|--------------|
| Vom2r13    | Rattus norvegicus vomeronasal 2 receptor, 13 (Vom2r13), mRNA [NM_001099489]                                                                             | <b>5,370</b> |
| Gabarapl2  | Rattus norvegicus GABA(A) receptor-associated protein like 2 (Gabarapl2), mRNA [NM_022706]                                                              | <b>5,369</b> |
| 0          | Unknown                                                                                                                                                 | <b>5,369</b> |
| Cox18      | Rattus norvegicus COX18 cytochrome c oxidase assembly homolog (S. cerevisiae) (Cox18), nuclear gene encoding mitochondrial protein, mRNA [NM_001106000] | <b>5,368</b> |
| Fam65c     | Uncharacterized protein [Source:UniProtKB/TrEMBL;Acc:D3ZX40] [ENSRNOT00000035463]                                                                       | <b>5,366</b> |
| Csf1r      | Rattus norvegicus colony stimulating factor 1 receptor (Csf1r), mRNA [NM_001029901]                                                                     | <b>5,366</b> |
| Polr3h     | Rattus norvegicus polymerase (RNA) III (DNA directed) polypeptide H (Polr3h), mRNA [NM_001127295]                                                       | <b>5,366</b> |
| RGD1307161 | Rattus norvegicus similar to 0610010K06Rik protein (RGD1307161), mRNA [NM_001025669]                                                                    | <b>5,365</b> |
| Strap      | Rattus norvegicus serine/threonine kinase receptor associated protein (Strap), mRNA [NM_001011969]                                                      | <b>5,365</b> |
| 0          | Unknown                                                                                                                                                 | <b>5,365</b> |
| Mall       | Rattus norvegicus mal, T-cell differentiation protein-like (Mall), mRNA [NM_001014182]                                                                  | <b>5,364</b> |
| Centd3     | PREDICTED: Rattus norvegicus centaurin, delta 3 (Centd3), miscRNA [XR_085668]                                                                           | <b>5,364</b> |
| Mark4      | Rattus norvegicus MAP/microtubule affinity-regulating kinase 4 (Mark4), mRNA [NM_001191071]                                                             | <b>5,364</b> |
| Igfbp1     | Rattus norvegicus insulin-like growth factor binding protein-like 1 (Igfbp1), mRNA [NM_001108972]                                                       | <b>5,364</b> |
| Itch       | Rattus norvegicus itchy E3 ubiquitin protein ligase homolog (mouse) (Itch), mRNA [NM_001005887]                                                         | <b>5,364</b> |
| 0          | Unknown                                                                                                                                                 | <b>5,361</b> |
| Pdzrn4     | Rattus norvegicus PDZ domain containing RING finger 4 (Pdzrn4), mRNA [NM_001108107]                                                                     | <b>5,361</b> |
| Sdccag10   | Rattus norvegicus serologically defined colon cancer antigen 10 (Sdccag10), mRNA [NM_001013199]                                                         | <b>5,361</b> |
| 0          | Unknown                                                                                                                                                 | <b>5,360</b> |
| Aftph      | PREDICTED: Rattus norvegicus aftiphilin (Aftph), mRNA [XM_001055784]                                                                                    | <b>5,359</b> |
| 0          | Unknown                                                                                                                                                 | <b>5,357</b> |
| Socs7      | Rattus norvegicus similar to SH2 domain containing SOCS box protein SOCS7 (LOC287659), mRNA [XM_213443]                                                 | <b>5,357</b> |
| Npepo      | Rattus norvegicus aminopeptidase O (Npepo), mRNA [NM_001012346]                                                                                         | <b>5,357</b> |
| Hif1an     | Rattus norvegicus hypoxia-inducible factor 1, alpha subunit inhibitor (Hif1an), mRNA [NM_001113749]                                                     | <b>5,357</b> |
| Lsg1       | Rattus norvegicus large subunit GTPase 1 homolog (S. cerevisiae) (Lsg1), mRNA [NM_001013421]                                                            | <b>5,356</b> |
| Fam151b    | Rattus norvegicus family with sequence similarity 151, member B (Fam151b), mRNA [NM_001134748]                                                          | <b>5,356</b> |
| Myh3       | Rattus norvegicus myosin, heavy chain 3, skeletal muscle, embryonic (Myh3), mRNA [NM_012604]                                                            | <b>5,355</b> |
| 0          | Uncharacterized protein [Source:UniProtKB/TrEMBL;Acc:D3ZEB6] [ENSRNOT00000010789]                                                                       | <b>5,355</b> |
| 0          | phosphatidylinositol glycan anchor biosynthesis, class A [Source:RefSeq peptide;Acc:NP_001102286] [ENSRNOT00000004733]                                  | <b>5,354</b> |
| RGD1305007 | Rattus norvegicus similar to RIKEN cDNA 1110031I02 (RGD1305007), mRNA [NM_001013976]                                                                    | <b>5,353</b> |
| RGD1563259 | Uncharacterized protein [Source:UniProtKB/TrEMBL;Acc:D3ZXP2] [ENSRNOT00000041819]                                                                       | <b>5,352</b> |
| Olr1229    | Rattus norvegicus olfactory receptor 1229 (Olr1229), mRNA [NM_001000444]                                                                                | <b>5,350</b> |
| LOC499779  | Uncharacterized protein C9orf119 homolog [Source:UniProtKB/Swiss-Prot;Acc:Q63ZV7] [ENSRNOT00000030558]                                                  | <b>5,349</b> |



|            |                                                                                                                            |       |
|------------|----------------------------------------------------------------------------------------------------------------------------|-------|
| Fam114a2   | PREDICTED: Rattus norvegicus family with sequence similarity 114, member A2 (Fam114a2), mRNA [XM_220442]                   | 5,349 |
| Thoc6      | Rattus norvegicus THO complex 6 homolog (Drosophila) (Thoc6), mRNA [NM_024384]                                             | 5,348 |
| Lgals4     | Rattus norvegicus lectin, galactoside-binding, soluble, 4 (Lgals4), mRNA [NM_012975]                                       | 5,347 |
| 0          | Unknown                                                                                                                    | 5,346 |
| 0          | Unknown                                                                                                                    | 5,346 |
| 0          | Rattus norvegicus cDNA clone IMAGE:7388791. [BC158842]                                                                     | 5,346 |
| Mepe       | Rattus norvegicus matrix extracellular phosphoglycoprotein (Mepe), mRNA [NM_024142]                                        | 5,346 |
| RGD1566314 | Uncharacterized protein [Source:UniProtKB/TrEMBL;Acc:D3ZPU0] [ENSRNOT00000027087]                                          | 5,345 |
| Raf1       | Rattus norvegicus v-raf-leukemia viral oncogene 1 (Raf1), mRNA [NM_012639]                                                 | 5,345 |
| Ceacam20   | Rattus norvegicus carcinoembryonic antigen-related cell adhesion molecule 20 (Ceacam20), mRNA [NM_001170324]               | 5,345 |
| Zfp438     | Rattus norvegicus zinc finger protein 438 (Zfp438), mRNA [NM_001107358]                                                    | 5,345 |
| 37681      | Rattus norvegicus membrane-associated ring finger (C3HC4) 3 (March3), mRNA [NM_001007759]                                  | 5,344 |
| 0          | Unknown                                                                                                                    | 5,344 |
| Rabep1     | Rattus norvegicus rabaptin, RAB GTPase binding effector protein 1 (Rabep1), mRNA [NM_019124]                               | 5,344 |
| Folr1      | Rattus norvegicus folate receptor 1 (adult) (Folr1), mRNA [NM_133527]                                                      | 5,344 |
| 0          | Unknown                                                                                                                    | 5,344 |
| RT1-M5     | Rattus norvegicus RT1 class Ib, locus M5 (RT1-M5), transcript variant 2, mRNA [NM_001048045]                               | 5,343 |
| 0          | Oxysterol-binding protein [Source:UniProtKB/TrEMBL;Acc:D3ZHZ3] [ENSRNOT00000042964]                                        | 5,342 |
| Als2cr4    | Rattus norvegicus amyotrophic lateral sclerosis 2 (juvenile) chromosome region, candidate 4 (Als2cr4), mRNA [NM_001108220] | 5,342 |
| 0          | Unknown                                                                                                                    | 5,342 |
| Acot8      | Rattus norvegicus acyl-CoA thioesterase 8 (Acot8), mRNA [NM_130756]                                                        | 5,342 |
| Glt8d1     | Rattus norvegicus glycosyltransferase 8 domain containing 1 (Glt8d1), mRNA [NM_001007683]                                  | 5,342 |
| Tmem45a    | Rattus norvegicus transmembrane protein 45A (Tmem45a), mRNA [NM_001191074]                                                 | 5,341 |
| 0          | Unknown                                                                                                                    | 5,341 |
| Atp6v1d    | Rattus norvegicus ATPase, H <sup>+</sup> transporting, lysosomal V1 subunit D (Atp6v1d), mRNA [NM_199386]                  | 5,340 |
| 0          | Unknown                                                                                                                    | 5,339 |
| 0          | Unknown                                                                                                                    | 5,339 |
| LOC688972  | PREDICTED: Rattus norvegicus similar to Glycophorin (LOC688972), mRNA [XM_001069014]                                       | 5,339 |
| Nmb        | Rattus norvegicus neuromedin B (Nmb), mRNA [NM_001109149]                                                                  | 5,338 |
| Epc2       | Rattus norvegicus enhancer of polycomb homolog 2 (Drosophila) (Epc2), mRNA [NM_001108581]                                  | 5,338 |
| 0          | Unknown                                                                                                                    | 5,337 |
| Manba      | Rattus norvegicus mannosidase, beta A, lysosomal (Manba), mRNA [NM_001031655]                                              | 5,334 |
| 0          | Uncharacterized protein [Source:UniProtKB/TrEMBL;Acc:D3ZIK8] [ENSRNOT00000025790]                                          | 5,334 |
| Tsen15     | Rattus norvegicus tRNA splicing endonuclease 15 homolog (S. cerevisiae) (Tsen15), mRNA [NM_001105958]                      | 5,333 |

|           |                                                                                                                                                   |              |
|-----------|---------------------------------------------------------------------------------------------------------------------------------------------------|--------------|
| Med22     | Rattus norvegicus mediator complex subunit 22 (Med22), mRNA [NM_001077679]                                                                        | <b>5,333</b> |
| Olr889    | Rattus norvegicus olfactory receptor 889 (Olr889), mRNA [NM_001000061]                                                                            | <b>5,331</b> |
| 0         | Unknown                                                                                                                                           | <b>5,331</b> |
| Irf7      | Rattus norvegicus interferon regulatory factor 7 (Irf7), mRNA [NM_001033691]                                                                      | <b>5,330</b> |
| 0         | Unknown                                                                                                                                           | <b>5,330</b> |
| Sfmbt1    | Rattus norvegicus Scm-like with four mbt domains 1 (Sfmbt1), mRNA [NM_031647]                                                                     | <b>5,329</b> |
| 0         | Unknown                                                                                                                                           | <b>5,329</b> |
| Cggbp1    | Rattus norvegicus CGG triplet repeat binding protein 1 (Cggbp1), mRNA [NM_001105900]                                                              | <b>5,328</b> |
| Osbp11    | Rattus norvegicus oxysterol binding protein-like 11 (Osbp11), mRNA [NM_001107090]                                                                 | <b>5,328</b> |
| 0         | Unknown                                                                                                                                           | <b>5,328</b> |
| Fosl2     | Rattus norvegicus fos-like antigen 2 (Fosl2), mRNA [NM_012954]                                                                                    | <b>5,328</b> |
| Pgam2     | Rattus norvegicus phosphoglycerate mutase 2 (muscle) (Pgam2), mRNA [NM_017328]                                                                    | <b>5,327</b> |
| Piwil2    | Rattus norvegicus piwi-like 2 (Drosophila) (Piwil2), mRNA [NM_001107276]                                                                          | <b>5,327</b> |
| Tmem11    | Rattus norvegicus transmembrane protein 11 (Tmem11), transcript variant 2, mRNA [NM_001166165]                                                    | <b>5,326</b> |
| Mgat4c    | Rattus norvegicus mannosyl (alpha-1,3-)-glycoprotein beta-1,4-N-acetylglucosaminyltransferase, isozyme C (putative) (Mgat4c), mRNA [NM_001135814] | <b>5,326</b> |
| Nphs2     | Rattus norvegicus nephrosis 2 homolog (human) (Nphs2), mRNA [NM_130828]                                                                           | <b>5,326</b> |
| 0         | Uncharacterized protein [Source:UniProtKB/TrEMBL;Acc:D3ZK88] [ENSRNOT00000061600]                                                                 | <b>5,325</b> |
| Dyt1      | Rattus norvegicus dystonia 1 (Dyt1), mRNA [NM_153303]                                                                                             | <b>5,324</b> |
| Gas8      | Rattus norvegicus growth arrest specific 8 (Gas8), mRNA [NM_001039030]                                                                            | <b>5,324</b> |
| Smok2a    | Rattus norvegicus sperm motility kinase 2A (Smok2a), mRNA [NM_001191619]                                                                          | <b>5,324</b> |
| 0         | Unknown                                                                                                                                           | <b>5,323</b> |
| Ptpn22    | Rattus norvegicus protein tyrosine phosphatase, non-receptor type 22 (lymphoid) (Ptpn22), mRNA [NM_001106460]                                     | <b>5,323</b> |
| Dhodh     | Rattus norvegicus dihydroorotate dehydrogenase (Dhodh), nuclear gene encoding mitochondrial protein, mRNA [NM_001008553]                          | <b>5,321</b> |
| Hdac3     | Rattus norvegicus histone deacetylase 3 (Hdac3), mRNA [NM_053448]                                                                                 | <b>5,320</b> |
| Cdyl2     | Rattus norvegicus chromodomain protein, Y chromosome-like 2 (Cdyl2), mRNA [NM_001106189]                                                          | <b>5,319</b> |
| LOC682202 | Uncharacterized protein [Source:UniProtKB/TrEMBL;Acc:D3ZFR6] [ENSRNOT00000043066]                                                                 | <b>5,319</b> |
| Amh       | Rattus norvegicus anti-Mullerian hormone (Amh), mRNA [NM_012902]                                                                                  | <b>5,319</b> |
| Cog7      | Rattus norvegicus component of oligomeric golgi complex 7 (Cog7), mRNA [NM_001033889]                                                             | <b>5,319</b> |
| Rpsud2    | Rattus norvegicus RNA pseudouridylate synthase domain containing 2 (Rpsud2), mRNA [NM_001135845]                                                  | <b>5,319</b> |
| Klf13     | Rattus norvegicus Kruppel-like factor 13 (Klf13), mRNA [NM_001109147]                                                                             | <b>5,316</b> |
| Agpat6    | Rattus norvegicus 1-acylglycerol-3-phosphate O-acyltransferase 6 (lysophosphatidic acid acyltransferase, zeta) (Agpat6), mRNA [NM_001047849]      | <b>5,316</b> |
| Nupl1     | Nucleoporin p58/p45 [Source:UniProtKB/Swiss-Prot;Acc:P70581] [ENSRNOT00000017204]                                                                 | <b>5,315</b> |
| 0         | Unknown                                                                                                                                           | <b>5,315</b> |

|            |                                                                                                                                   |              |
|------------|-----------------------------------------------------------------------------------------------------------------------------------|--------------|
| Rab11fip4  | Rattus norvegicus RAB11 family interacting protein 4 (class II) (Rab11fip4), mRNA [NM_001107023]                                  | <b>5,315</b> |
| LOC499782  | Rattus norvegicus similar to 60S ribosomal protein L12 (LOC499782), mRNA [NM_001109198]                                           | <b>5,314</b> |
| LOC363060  | Rattus norvegicus similar to RIKEN cDNA 1600029D21 (LOC363060), mRNA [NM_001014209]                                               | <b>5,314</b> |
| Tbx21      | Rattus norvegicus T-box 21 (Tbx21), mRNA [NM_001107043]                                                                           | <b>5,314</b> |
| 0          | Unknown                                                                                                                           | <b>5,314</b> |
| Ctr9       | Rattus norvegicus Ctr9, Paf1/RNA polymerase II complex component, homolog (S. cerevisiae) (Ctr9), mRNA [NM_001100661]             | <b>5,314</b> |
| Chm        | Rattus norvegicus choroideremia (Rab escort protein 1) (Chm), mRNA [NM_017067]                                                    | <b>5,313</b> |
| 0          | Unknown                                                                                                                           | <b>5,312</b> |
| Pfkm       | Rattus norvegicus phosphofructokinase, muscle (Pfkm), mRNA [NM_031715]                                                            | <b>5,312</b> |
| Sgol2      | Uncharacterized protein [Source:UniProtKB/TrEMBL;Acc:D3ZWI4] [ENSRNOT00000029526]                                                 | <b>5,312</b> |
| 0          | Unknown                                                                                                                           | <b>5,312</b> |
| Pbp2       | Rattus norvegicus phosphatidylethanolamine binding protein 2 (Pbp2), mRNA [NM_001105756]                                          | <b>5,311</b> |
| 0          | Rattus norvegicus TL0AEA5YK19 mRNA sequence. [FQ233969]                                                                           | <b>5,309</b> |
| Skil       | Uncharacterized protein [Source:UniProtKB/TrEMBL;Acc:D3ZWL1] [ENSRNOT00000013191]                                                 | <b>5,308</b> |
| LOC690460  | Rattus norvegicus similar to keratin associated protein 10-7 (LOC690460), mRNA [NM_001109593]                                     | <b>5,308</b> |
| Gpr25      | RCG45981Uncharacterized protein [Source:UniProtKB/TrEMBL;Acc:D4A7G6] [ENSRNOT00000011368]                                         | <b>5,307</b> |
| 0          | Uncharacterized protein [Source:UniProtKB/TrEMBL;Acc:D3ZKC7] [ENSRNOT00000064975]                                                 | <b>5,307</b> |
| LOC681336  | PREDICTED: Rattus norvegicus similar to spermatogenesis associated glutamate (E)-rich protein 4d (LOC681336), mRNA [XM_001061313] | <b>5,306</b> |
| RGD1560010 | Rattus norvegicus RGD1560010 (RGD1560010), mRNA [NM_001107685]                                                                    | <b>5,306</b> |
| Fam91a1    | Rattus norvegicus family with sequence similarity 91, member A1 (Fam91a1), mRNA [NM_001127578]                                    | <b>5,305</b> |
| LOC682131  | PREDICTED: Rattus norvegicus similar to KRAB-zinc finger protein (LOC682131), mRNA [XM_001060021]                                 | <b>5,304</b> |
| Tect2      | Rattus norvegicus tectonic 2 (Tect2), mRNA [NM_001080782]                                                                         | <b>5,304</b> |
| Ccnt2      | Rattus norvegicus cyclin T2 (Ccnt2), mRNA [NM_001107171]                                                                          | <b>5,304</b> |
| RGD1310185 | Uncharacterized protein [Source:UniProtKB/TrEMBL;Acc:D3ZCD2] [ENSRNOT00000032301]                                                 | <b>5,304</b> |
| 0          | Unknown                                                                                                                           | <b>5,304</b> |
| 0          | Uncharacterized protein [Source:UniProtKB/TrEMBL;Acc:D3ZAW7] [ENSRNOT00000041850]                                                 | <b>5,304</b> |
| 0          | Unknown                                                                                                                           | <b>5,303</b> |
| 0          | Unknown                                                                                                                           | <b>5,302</b> |
| Tob1       | Rattus norvegicus transducer of ErbB-2.1 (Tob1), mRNA [NM_133317]                                                                 | <b>5,300</b> |
| Yaf2       | Rattus norvegicus YY1 associated factor 2 (Yaf2), mRNA [NM_001134871]                                                             | <b>5,299</b> |
| Rpe        | Rattus norvegicus ribulose-5-phosphate-3-epimerase (Rpe), mRNA [NM_001033903]                                                     | <b>5,299</b> |
| Sympk      | Rattus norvegicus symplekin (Sympk), mRNA [NM_001100830]                                                                          | <b>5,299</b> |
| Plaa       | Rattus norvegicus phospholipase A2, activating protein (Plaa), mRNA [NM_053866]                                                   | <b>5,298</b> |
| Dnai2      | Rattus norvegicus dynein, axonemal, intermediate chain 2 (Dnai2), mRNA [NM_001007726]                                             | <b>5,298</b> |

|              |                                                                                                                                                                           |              |
|--------------|---------------------------------------------------------------------------------------------------------------------------------------------------------------------------|--------------|
| Nisch        | Nischarin [Source:UniProtKB/Swiss-Prot;Acc:Q4G017] [ENSRNOT00000066465]                                                                                                   | <b>5,298</b> |
| 0            | Unknown                                                                                                                                                                   | <b>5,297</b> |
| Hsp90aa1     | Rattus norvegicus heat shock protein 90, alpha (cytosolic), class A member 1 (Hsp90aa1), mRNA [NM_175761]                                                                 | <b>5,296</b> |
| Cldn11       | Rattus norvegicus claudin 11 (Cldn11), mRNA [NM_053457]                                                                                                                   | <b>5,296</b> |
| Snrnp35      | Rattus norvegicus small nuclear ribonucleoprotein 35 (U11/U12) (Snrnp35), mRNA [NM_001014127]                                                                             | <b>5,295</b> |
| LOC688632    | PREDICTED: Rattus norvegicus similar to 60S ribosomal protein L17 (L23) (Amino acid starvation-induced protein) (ASI) (LOC688632), mRNA [XM_001067694]                    | <b>5,295</b> |
| Pdia4        | Rattus norvegicus protein disulfide isomerase family A, member 4 (Pdia4), mRNA [NM_053849]                                                                                | <b>5,294</b> |
| Nanos1       | Uncharacterized protein [Source:UniProtKB/TrEMBL;Acc:D4A1F8] [ENSRNOT00000036203]                                                                                         | <b>5,294</b> |
| LOC501033    | Uncharacterized protein [Source:UniProtKB/TrEMBL;Acc:D3ZGF2] [ENSRNOT00000018553]                                                                                         | <b>5,294</b> |
| Socs3        | Rattus norvegicus suppressor of cytokine signaling 3 (Socs3), mRNA [NM_053565]                                                                                            | <b>5,293</b> |
| Mdfic        | Rattus norvegicus MyoD family inhibitor domain containing (Mdfic), mRNA [NM_001105668]                                                                                    | <b>5,292</b> |
| Rnf149       | Uncharacterized protein [Source:UniProtKB/TrEMBL;Acc:D3ZI66] [ENSRNOT00000018684]                                                                                         | <b>5,292</b> |
| Cntnap5a     | Rattus norvegicus contactin associated protein-like 5A (Cntnap5a), mRNA [NM_001047865]                                                                                    | <b>5,291</b> |
| Herc4        | Rattus norvegicus hect domain and RLD 4 (Herc4), mRNA [NM_001012074]                                                                                                      | <b>5,291</b> |
| Dnd1         | Rattus norvegicus dead end homolog 1 (zebrafish) (Dnd1), mRNA [NM_001109379]                                                                                              | <b>5,290</b> |
| 0            | Unknown                                                                                                                                                                   | <b>5,288</b> |
| Blvra        | Rattus norvegicus biliverdin reductase A (Blvra), mRNA [NM_053850]                                                                                                        | <b>5,288</b> |
| Phpt1        | Rattus norvegicus phosphohistidine phosphatase 1 (Phpt1), mRNA [NM_001106558]                                                                                             | <b>5,288</b> |
| 0            | Unknown                                                                                                                                                                   | <b>5,288</b> |
| 0            | Unknown                                                                                                                                                                   | <b>5,288</b> |
| 0            | Rattus norvegicus similar to 60S ribosomal protein L12 (LOC296165), mRNA [XM_215850]                                                                                      | <b>5,287</b> |
| Dynlrb2      | Rattus norvegicus dynein light chain roadblock-type 2 (Dynlrb2), mRNA [NM_001108451]                                                                                      | <b>5,287</b> |
| 0            | Unknown                                                                                                                                                                   | <b>5,286</b> |
| Ica1l        | Rattus norvegicus islet cell autoantigen 1-like (Ica1l), mRNA [NM_199400]                                                                                                 | <b>5,286</b> |
| RGD1311463   | Rattus norvegicus similar to RIKEN cDNA 2700007P21 (RGD1311463), mRNA [NM_001014045]                                                                                      | <b>5,286</b> |
| Mmadhc       | Rattus norvegicus methylmalonic aciduria (cobalamin deficiency) cbID type, with homocystinuria (Mmadhc), nuclear gene encoding mitochondrial protein, mRNA [NM_001004280] | <b>5,286</b> |
| Hint3        | Histidine triad nucleotide-binding protein 3 [Source:UniProtKB/Swiss-Prot;Acc:Q8K3P7] [ENSRNOT00000019047]                                                                | <b>5,285</b> |
| LOC100366173 | PREDICTED: Rattus norvegicus Zinc finger protein 383-like, transcript variant 3 (LOC100366173), mRNA [XM_002725562]                                                       | <b>5,284</b> |
| 0            | Q6NW38_HUMAN (Q6NW38) IVNS1ABP protein, partial (5%) [TC590756]                                                                                                           | <b>5,280</b> |
| Tpd52l3      | Rattus norvegicus tumor protein D52-like 3 (Tpd52l3), mRNA [NM_001106349]                                                                                                 | <b>5,278</b> |
| Tmem117      | PREDICTED: Rattus norvegicus transmembrane protein 117 (Tmem117), mRNA [XM_001058576]                                                                                     | <b>5,278</b> |
| Pigz         | Rattus norvegicus phosphatidylinositol glycan anchor biosynthesis, class Z (Pigz), mRNA [NM_001109525]                                                                    | <b>5,278</b> |

|              |                                                                                                              |       |
|--------------|--------------------------------------------------------------------------------------------------------------|-------|
| Ica1         | Rattus norvegicus islet cell autoantigen 1 (Ica1), mRNA [NM_030844]                                          | 5,277 |
| 0            | Uncharacterized protein [Source:UniProtKB/TrEMBL;Acc:D3ZBR0] [ENSRNOT00000045189]                            | 5,277 |
| Nmur1        | Rattus norvegicus neuromedin U receptor 1 (Nmur1), mRNA [NM_023100]                                          | 5,276 |
| Adat1        | Rattus norvegicus adenosine deaminase, tRNA-specific 1 (Adat1), mRNA [NM_001109611]                          | 5,276 |
| 0            | Unknown                                                                                                      | 5,276 |
| Ifitm6       | Uncharacterized protein [Source:UniProtKB/TrEMBL;Acc:D3ZR91] [ENSRNOT00000054875]                            | 5,275 |
| Olr202       | Rattus norvegicus olfactory receptor 202 (Olr202), mRNA [NM_001000550]                                       | 5,275 |
| Psg19        | Rattus norvegicus pregnancy specific glycoprotein 19 (Psg19), mRNA [NM_019126]                               | 5,274 |
| 0            | Unknown                                                                                                      | 5,274 |
| 0            | Probable O-sialoglycoprotein endopeptidase 2 [Source:UniProtKB/Swiss-Prot;Acc:Q4V7F3] [ENSRNOT00000039880]   | 5,273 |
| 0            | Fam40a protein [Source:UniProtKB/TrEMBL;Acc:Q4FZS7] [ENSRNOT00000033776]                                     | 5,272 |
| 0            | Unknown                                                                                                      | 5,272 |
| 0            | Rattus norvegicus similar to heat shock protein 84 - mouse (LOC291871), mRNA [XM_226259]                     | 5,271 |
| Wdr35l       | Rattus norvegicus WD repeat domain 35-like (Wdr35l), mRNA [NM_001099340]                                     | 5,270 |
| LOC688966    | Rattus norvegicus similar to K11B4.2 (LOC688966), mRNA [NM_001145726]                                        | 5,270 |
| RGD1559982   | PREDICTED: Rattus norvegicus similar to paraneoplastic antigen like 6A (RGD1559982), mRNA [XM_001058237]     | 5,270 |
| Ankrd60      | RCG40922Uncharacterized protein [Source:UniProtKB/TrEMBL;Acc:D3ZTI6] [ENSRNOT00000055082]                    | 5,270 |
| 0            | Unknown                                                                                                      | 5,269 |
| RGD1563378   | RCG36341Uncharacterized protein [Source:UniProtKB/TrEMBL;Acc:D3ZC26] [ENSRNOT00000050544]                    | 5,269 |
| Med31        | Rattus norvegicus mediator complex subunit 31 (Med31), mRNA [NM_001135813]                                   | 5,269 |
| LOC100363987 | PREDICTED: Rattus norvegicus mCG114897-like (LOC100363987), miscRNA [XR_085743]                              | 5,268 |
| 0            | Adenosylhomocysteinase [Source:UniProtKB/TrEMBL;Acc:D4AB27] [ENSRNOT00000017748]                             | 5,268 |
| 0            | Unknown                                                                                                      | 5,267 |
| Slc27a3      | Rattus norvegicus solute carrier family 27 (fatty acid transporter), member 3 (Slc27a3), mRNA [NM_001106439] | 5,266 |
| Kifc3        | Rattus norvegicus kinesin family member C3 (Kifc3), mRNA [NM_001103352]                                      | 5,266 |
| Ctnn         | Rattus norvegicus cortactin (Ctnn), mRNA [NM_021868]                                                         | 5,264 |
| LOC301839    | PREDICTED: Rattus norvegicus similar to Spindlin-like protein 2 (SPIN-2) (LOC301839), mRNA [XM_001061753]    | 5,263 |
| Sdccag3      | Rattus norvegicus serologically defined colon cancer antigen 3 (Sdccag3), mRNA [NM_001013135]                | 5,262 |
| 0            | Uncharacterized protein [Source:UniProtKB/TrEMBL;Acc:D3ZMU6] [ENSRNOT00000057016]                            | 5,262 |
| Tmco3        | Rattus norvegicus transmembrane and coiled-coil domains 3 (Tmco3), mRNA [NM_001135857]                       | 5,261 |
| Med6         | Rattus norvegicus mediator complex subunit 6 (Med6), mRNA [NM_001106742]                                     | 5,261 |
| Hebp2        | Rattus norvegicus heme binding protein 2 (Hebp2), mRNA [NM_001107515]                                        | 5,261 |
| Rab26        | Rattus norvegicus RAB26, member RAS oncogene family (Rab26), mRNA [NM_133580]                                | 5,260 |
| 0            | Unknown                                                                                                      | 5,259 |

|           |                                                                                                                                                         |       |
|-----------|---------------------------------------------------------------------------------------------------------------------------------------------------------|-------|
| LOC691130 | PREDICTED: Rattus norvegicus hypothetical protein LOC691130 (LOC691130), mRNA [XM_001076936]                                                            | 5,259 |
| Flt4      | Rattus norvegicus fms-related tyrosine kinase 4 (Flt4), mRNA [NM_053652]                                                                                | 5,259 |
| Slc4a3    | Rattus norvegicus solute carrier family 4 (anion exchanger), member 3 (Slc4a3), mRNA [NM_017049]                                                        | 5,259 |
| Psip1     | Rattus norvegicus PC4 and SFRS1 interacting protein 1 (Psip1), mRNA [NM_175765]                                                                         | 5,258 |
| Fads3     | Rattus norvegicus fatty acid desaturase 3 (Fads3), mRNA [NM_173137]                                                                                     | 5,258 |
| 0         | Rattus norvegicus similar to hypothetical protein (LOC301869), mRNA [XM_229350]                                                                         | 5,257 |
| Pdia3     | Rattus norvegicus protein disulfide isomerase family A, member 3 (Pdia3), mRNA [NM_017319]                                                              | 5,257 |
| Cdc42ep3  | Rattus norvegicus CDC42 effector protein (Rho GTPase binding) 3 (Cdc42ep3), mRNA [NM_001048044]                                                         | 5,256 |
| Pnkd      | Rattus norvegicus paroxysmal nonkinesinogenic dyskinesia (Pnkd), nuclear gene encoding mitochondrial protein, transcript variant 3, mRNA [NM_001134753] | 5,255 |
| Tmlhe     | Rattus norvegicus trimethyllysine hydroxylase, epsilon (Tmlhe), nuclear gene encoding mitochondrial protein, mRNA [NM_133387]                           | 5,255 |
| Cep135    | Uncharacterized protein [Source:UniProtKB/TrEMBL;Acc:D3Z135] [ENSRNOT00000032156]                                                                       | 5,255 |
| Ccdc87    | Rattus norvegicus coiled-coil domain containing 87 (Ccdc87), mRNA [NM_001109527]                                                                        | 5,255 |
| Rrs1      | Rattus norvegicus RRS1 ribosome biogenesis regulator homolog (S. cerevisiae) (Rrs1), mRNA [NM_001079699]                                                | 5,255 |
| Prkar1a   | Rattus norvegicus protein kinase, cAMP-dependent, regulatory, type I, alpha (Prkar1a), mRNA [NM_013181]                                                 | 5,254 |
| 0         | Unknown                                                                                                                                                 | 5,254 |
| Pik3ca    | Rattus norvegicus phosphoinositide-3-kinase, catalytic, alpha polypeptide (Pik3ca), mRNA [NM_133399]                                                    | 5,253 |
| Hapln1    | Rattus norvegicus hyaluronan and proteoglycan link protein 1 (Hapln1), mRNA [NM_019189]                                                                 | 5,253 |
| Zfp347    | Rattus norvegicus zinc finger protein 347 (Zfp347), mRNA [NM_133390]                                                                                    | 5,252 |
| Efemp1    | Rattus norvegicus EGF-containing fibulin-like extracellular matrix protein 1 (Efemp1), mRNA [NM_001012039]                                              | 5,251 |
| Anks3     | Rattus norvegicus ankyrin repeat and sterile alpha motif domain containing 3 (Anks3), mRNA [NM_001009676]                                               | 5,251 |
| Fgf9      | Rattus norvegicus fibroblast growth factor 9 (Fgf9), mRNA [NM_012952]                                                                                   | 5,251 |
| Ly96      | Rattus norvegicus lymphocyte antigen 96 (Ly96), mRNA [NM_001024279]                                                                                     | 5,251 |
| 0         | Rattus norvegicus similar to hippocampal cholinergic neurostimulating peptide precursor protein (LOC293883), mRNA [XM_219774]                           | 5,251 |
| Atp6v0b   | Rattus norvegicus ATPase, H <sup>+</sup> transporting, lysosomal V0 subunit B (Atp6v0b), mRNA [NM_001106681]                                            | 5,250 |
| 0         | Unknown                                                                                                                                                 | 5,250 |
| 0         | Histone H2A type 1-F [Source:UniProtKB/Swiss-Prot;Acc:Q64598] [ENSRNOT00000041929]                                                                      | 5,250 |
| 0         | Glyceraldehyde-3-phosphate dehydrogenase [Source:UniProtKB/TrEMBL;Acc:D3ZKR3] [ENSRNOT0000008094]                                                       | 5,249 |
| Lrfn1     | Rattus norvegicus leucine rich repeat and fibronectin type III domain containing 1 (Lrfn1), transcript variant 2, mRNA [NM_001108910]                   | 5,248 |
| Smpdl3a   | Rattus norvegicus sphingomyelin phosphodiesterase, acid-like 3A (Smpdl3a), mRNA [NM_001005539]                                                          | 5,248 |
| Mib1      | Rattus norvegicus mindbomb homolog 1 (Drosophila) (Mib1), mRNA [NM_001107405]                                                                           | 5,248 |
| Ndufb8    | Rattus norvegicus NADH dehydrogenase (ubiquinone) 1 beta subcomplex 8 (Ndufb8), nuclear gene encoding mitochondrial protein, mRNA [NM_001106360]        | 5,246 |
| Gabrg3    | Rattus norvegicus gamma-aminobutyric acid (GABA) A receptor, gamma 3 (Gabrg3), mRNA [NM_024370]                                                         | 5,246 |

|              |                                                                                                                    |       |
|--------------|--------------------------------------------------------------------------------------------------------------------|-------|
| Olr227       | Rattus norvegicus olfactory receptor 227 (Olr227), mRNA [NM_001000203]                                             | 5,245 |
| Gadd45a      | Rattus norvegicus growth arrest and DNA-damage-inducible, alpha (Gadd45a), mRNA [NM_024127]                        | 5,245 |
| Entpd7       | Rattus norvegicus ectonucleoside triphosphate diphosphohydrolase 7 (Entpd7), mRNA [NM_001107595]                   | 5,244 |
| Zfp281       | Rattus norvegicus zinc finger protein 281 (Zfp281), mRNA [NM_001012030]                                            | 5,244 |
| Scarb2       | Rattus norvegicus scavenger receptor class B, member 2 (Scarb2), mRNA [NM_054001]                                  | 5,243 |
| 0            | Unknown                                                                                                            | 5,243 |
| Znf287       | Rattus norvegicus zinc finger protein 287 (Znf287), mRNA [NM_001107008]                                            | 5,243 |
| Noc3l        | Rattus norvegicus nucleolar complex associated 3 homolog (S. cerevisiae) (Noc3l), mRNA [NM_001108523]              | 5,243 |
| 0            | Unknown                                                                                                            | 5,242 |
| Gtf2a1       | Rattus norvegicus general transcription factor IIA, 1 (Gtf2a1), mRNA [NM_022208]                                   | 5,241 |
| 0            | Unknown                                                                                                            | 5,240 |
| Zfp219       | Rattus norvegicus zinc finger protein 219 (Zfp219), mRNA [NM_001007681]                                            | 5,240 |
| Znf646       | Uncharacterized protein [Source:UniProtKB/TrEMBL;Acc:D3ZZ84] [ENSRNOT00000036187]                                  | 5,239 |
| Ptpn18       | Rattus norvegicus protein tyrosine phosphatase, non-receptor type 18 (Ptpn18), mRNA [NM_001013111]                 | 5,239 |
| 0            | Uncharacterized protein [Source:UniProtKB/TrEMBL;Acc:D3ZCQ8] [ENSRNOT00000047654]                                  | 5,239 |
| Wipi2        | Rattus norvegicus WD repeat domain, phosphoinositide interacting 2 (Wipi2), mRNA [NM_001007615]                    | 5,238 |
| Slc12a4      | Rattus norvegicus solute carrier family 12 (potassium/chloride transporters), member 4 (Slc12a4), mRNA [NM_019229] | 5,237 |
| LOC100158225 | Rattus norvegicus hypothetical protein LOC100158225 (LOC100158225), mRNA [NM_001127606]                            | 5,237 |
| Wdr31        | Rattus norvegicus WD repeat domain 31 (Wdr31), mRNA [NM_001011976]                                                 | 5,237 |
| RGD1561481   | PREDICTED: Rattus norvegicus similar to ubiquitin specific protease 12 (RGD1561481), mRNA [XM_577055]              | 5,236 |
| Rhbg         | Rattus norvegicus Rh family, B glycoprotein (Rhbg), mRNA [NM_183054]                                               | 5,236 |
| 0            | Rattus norvegicus similar to KIAA1895 protein (LOC293775), mRNA [XM_219621]                                        | 5,235 |
| 0            | Peptidyl-prolyl cis-trans isomerase [Source:UniProtKB/TrEMBL;Acc:D3ZUZ9] [ENSRNOT00000011302]                      | 5,235 |
| 0            | Uncharacterized protein [Source:UniProtKB/TrEMBL;Acc:D4A0Y6] [ENSRNOT00000038176]                                  | 5,235 |
| Rab11a       | Rattus norvegicus RAB11a, member RAS oncogene family (Rab11a), mRNA [NM_031152]                                    | 5,235 |
| Med27        | Rattus norvegicus mediator complex subunit 27 (Med27), mRNA [NM_001106565]                                         | 5,235 |
| 0            | Unknown                                                                                                            | 5,235 |
| 0            | Uncharacterized protein [Source:UniProtKB/TrEMBL;Acc:D3ZG82] [ENSRNOT00000063806]                                  | 5,234 |
| 0            | Uncharacterized protein [Source:UniProtKB/TrEMBL;Acc:D3Z934] [ENSRNOT00000019780]                                  | 5,232 |
| Lmo1         | Rattus norvegicus LIM domain only 1 (Lmo1), mRNA [NM_139112]                                                       | 5,232 |
| Zfp276       | Uncharacterized protein [Source:UniProtKB/TrEMBL;Acc:D4A710] [ENSRNOT00000022324]                                  | 5,232 |
| 0            | Small nuclear ribonucleoprotein-associated protein B [Source:UniProtKB/Swiss-Prot;Acc:P17136] [ENSRNOT00000043260] | 5,232 |
| Nfrkb        | Rattus norvegicus nuclear factor related to kappa B binding protein (Nfrkb), mRNA [NM_001108133]                   | 5,232 |
| Slco4a1      | Rattus norvegicus solute carrier organic anion transporter family, member 4a1 (Slco4a1), mRNA [NM_133608]          | 5,231 |

|            |                                                                                                                                                                                |       |
|------------|--------------------------------------------------------------------------------------------------------------------------------------------------------------------------------|-------|
| Rpl31      | Rattus norvegicus ribosomal protein L31 (Rpl31), mRNA [NM_022506]                                                                                                              | 5,230 |
| Kif3b      | Rattus norvegicus kinesin family member 3B (Kif3b), mRNA [NM_001106529]                                                                                                        | 5,229 |
| Lrrc14     | Rattus norvegicus leucine rich repeat containing 14 (Lrrc14), mRNA [NM_001024354]                                                                                              | 5,229 |
| Ptpla      | Rattus norvegicus protein tyrosine phosphatase-like (proline instead of catalytic arginine), member a (Ptpla), mRNA [NM_001101001]                                             | 5,229 |
| Dopey2     | Rattus norvegicus dopey family member 2 (Dopey2), mRNA [NM_001191660]                                                                                                          | 5,228 |
| LOC499781  | Uncharacterized protein C9orf117 homolog [Source:UniProtKB/Swiss-Prot;Acc:Q4V7B0] [ENSRNOT00000020660]                                                                         | 5,227 |
| 0          | Rattus norvegicus similar to Peptidylprolyl isomerase-like 2 (LOC302108), mRNA [XM_217532]                                                                                     | 5,227 |
| Fbxo2      | Rattus norvegicus F-box protein 2 (Fbxo2), mRNA [NM_053511]                                                                                                                    | 5,226 |
| Alpl2      | PREDICTED: Rattus norvegicus similar to alkaline phosphatase (EC 3.1.3.1) precursor, placental-like - human (RGD1565100), mRNA [XM_001064732]                                  | 5,226 |
| Exoc6b     | Rattus norvegicus exocyst complex component 6B (Exoc6b), mRNA [NM_001109246]                                                                                                   | 5,226 |
| RGD1561940 | PREDICTED: Rattus norvegicus similar to KB07 protein (RGD1561940), partial mRNA [XM_002725261]                                                                                 | 5,225 |
| Ece2       | Rattus norvegicus endothelin-converting enzyme 2 (Ece2), mRNA [NM_001002815]                                                                                                   | 5,225 |
| RGD1559531 | Uncharacterized protein [Source:UniProtKB/TrEMBL;Acc:D3ZQ96] [ENSRNOT00000048673]                                                                                              | 5,225 |
| Ftsjd1     | Rattus norvegicus FtsJ methyltransferase domain containing 1 (Ftsjd1), mRNA [NM_001106186]                                                                                     | 5,225 |
| Tnrc6b     | Rattus norvegicus trinucleotide repeat containing 6B (Tnrc6b), mRNA [NM_138845]                                                                                                | 5,224 |
| Ppil4      | Rattus norvegicus peptidylprolyl isomerase (cyclophilin)-like 4 (Ppil4), mRNA [NM_001108457]                                                                                   | 5,223 |
| RGD1565025 | RCG48116, isoform CRA_aUncharacterized protein [Source:UniProtKB/TrEMBL;Acc:D4A806] [ENSRNOT00000028197]                                                                       | 5,221 |
| Ptpn2      | Rattus norvegicus protein tyrosine phosphatase, non-receptor type 2 (Ptpn2), mRNA [NM_053990]                                                                                  | 5,219 |
| Golt1a     | Rattus norvegicus golgi transport 1 homolog A (S. cerevisiae) (Golt1a), mRNA [NM_001109070]                                                                                    | 5,219 |
| Fam69a     | Rattus norvegicus family with sequence similarity 69, member A (Fam69a), mRNA [NM_001170456]                                                                                   | 5,219 |
| 0          | Unknown                                                                                                                                                                        | 5,219 |
| 0          | Unknown                                                                                                                                                                        | 5,218 |
| S100z      | Rattus norvegicus S100 calcium binding protein Z (S100z), mRNA [NM_001191701]                                                                                                  | 5,218 |
| Ces1a      | Rattus norvegicus carboxylesterase 1A (Ces1a), mRNA [NM_001190375]                                                                                                             | 5,218 |
| Glyctk     | Rattus norvegicus glycerate kinase (Glyctk), mRNA [NM_001109449]                                                                                                               | 5,217 |
| 0          | Unknown                                                                                                                                                                        | 5,217 |
| Nap5       | PREDICTED: Rattus norvegicus Nck-associated protein 5 (Nap5), mRNA [XM_344134]                                                                                                 | 5,217 |
| Nvl        | Rattus norvegicus nuclear VCP-like (Nvl), mRNA [NM_001105980]                                                                                                                  | 5,216 |
| Pikfyve    | Similar to phosphatidylinositol-3-phosphate/phosphatidylinositol 5-kinase, type III isoform 2Uncharacterized protein [Source:UniProtKB/TrEMBL;Acc:D3ZT14] [ENSRNOT00000020447] | 5,215 |
| Osgin1     | Rattus norvegicus oxidative stress induced growth inhibitor 1 (Osgin1), mRNA [NM_138504]                                                                                       | 5,213 |
| Rufy2      | Rattus norvegicus RUN and FYVE domain containing 2 (Rufy2), mRNA [NM_001168586]                                                                                                | 5,212 |
| Kctd21     | Rattus norvegicus potassium channel tetramerisation domain containing 21 (Kctd21), mRNA [NM_001109151]                                                                         | 5,212 |



|            |                                                                                                                                                                         |       |
|------------|-------------------------------------------------------------------------------------------------------------------------------------------------------------------------|-------|
| Ctu1       | Rattus norvegicus cytosolic thiouridylase subunit 1 homolog (S. pombe) (Ctu1), mRNA [NM_001106251]                                                                      | 5,212 |
| 0          | Unknown                                                                                                                                                                 | 5,210 |
| Morc3      | Rattus norvegicus MORC family CW-type zinc finger 3 (Morc3), mRNA [NM_001107109]                                                                                        | 5,210 |
| 0          | Unknown                                                                                                                                                                 | 5,209 |
| Kcnmb3     | Rattus norvegicus potassium large conductance calcium-activated channel, subfamily M beta member 3 (Kcnmb3), mRNA [NM_001104560]                                        | 5,209 |
| Avil       | Rattus norvegicus advillin (Avil), mRNA [NM_024401]                                                                                                                     | 5,209 |
| Snx8       | Rattus norvegicus sorting nexin 8 (Snx8), mRNA [NM_001105912]                                                                                                           | 5,209 |
| 0          | Unknown                                                                                                                                                                 | 5,209 |
| RGD1308117 | Rattus norvegicus similar to 9930012K11Rik protein (RGD1308117), mRNA [NM_001134571]                                                                                    | 5,209 |
| Lmbr1l     | Rattus norvegicus limb region 1-like homolog (mouse) (Lmbr1l), mRNA [NM_001013950]                                                                                      | 5,209 |
| Ostc       | Rattus norvegicus oligosaccharyltransferase complex subunit (Ostc), mRNA [NM_001108566]                                                                                 | 5,208 |
| Galnt14    | Rattus norvegicus UDP-N-acetyl-alpha-D-galactosamine:polypeptide N-acetylgalactosaminyltransferase 14 (GalNAc-T14) (Galnt14), mRNA [NM_001012109]                       | 5,208 |
| Timm13     | Rattus norvegicus translocase of inner mitochondrial membrane 13 homolog (yeast) (Timm13), nuclear gene encoding mitochondrial protein, mRNA [NM_145781]                | 5,207 |
| Oprm1      | Rattus norvegicus opioid receptor, mu 1 (Oprm1), transcript variant MOR-1B2, mRNA [NM_001038599]                                                                        | 5,207 |
| Serp2      | Rattus norvegicus stress-associated endoplasmic reticulum protein family member 2 (Serp2), mRNA [NM_001109104]                                                          | 5,207 |
| 0          | Unknown                                                                                                                                                                 | 5,206 |
| 0          | Rattus norvegicus similar to Glyceraldehyde 3-phosphate dehydrogenase (GAPDH) (38 kDa BFA-dependent ADP-ribosylation substrate) (BARS-38) (LOC362444), mRNA [XM_342766] | 5,206 |
| 0          | Leucine-rich repeat-containing protein KIAA1731 homolog [Source:UniProtKB/Swiss-Prot;Acc:A4L9P8] [ENSRNOT00000029634]                                                   | 5,206 |
| Eif2b5     | Rattus norvegicus eukaryotic translation initiation factor 2B, subunit 5 epsilon (Eif2b5), mRNA [NM_138866]                                                             | 5,206 |
| 0          | Uncharacterized protein [Source:UniProtKB/TrEMBL;Acc:D3ZAQ6] [ENSRNOT00000024122]                                                                                       | 5,205 |
| LOC684280  | PREDICTED: Rattus norvegicus similar to Class I histocompatibility antigen, Non-RT1.A alpha-1 chain precursor (LOC684280), partial mRNA [XM_001069706]                  | 5,205 |
| 0          | Putative uncharacterized protein RGD1559942_predictedUncharacterized protein [Source:UniProtKB/TrEMBL;Acc:D3ZXR2] [ENSRNOT00000059680]                                  | 5,205 |
| Ccng2      | Rattus norvegicus cyclin G2 (Ccng2), mRNA [NM_001105725]                                                                                                                | 5,204 |
| 0          | Unknown                                                                                                                                                                 | 5,202 |
| 0          | Unknown                                                                                                                                                                 | 5,202 |
| Camsap1    | Rattus norvegicus calmodulin regulated spectrin-associated protein 1 (Camsap1), mRNA [NM_001168549]                                                                     | 5,201 |
| Nt5dc2     | Rattus norvegicus 5'-nucleotidase domain containing 2 (Nt5dc2), mRNA [NM_001009271]                                                                                     | 5,200 |
| 0          | Unknown                                                                                                                                                                 | 5,200 |
| Tut1       | Rattus norvegicus terminal uridylyl transferase 1, U6 snRNA-specific (Tut1), mRNA [NM_001033901]                                                                        | 5,200 |

|            |                                                                                                                                                    |              |
|------------|----------------------------------------------------------------------------------------------------------------------------------------------------|--------------|
| Camkk1     | Rattus norvegicus calcium/calmodulin-dependent protein kinase kinase 1, alpha (Camkk1), mRNA [NM_031662]                                           | <b>5,199</b> |
| Phrf1      | Rattus norvegicus PHD and ring finger domains 1 (Phrf1), mRNA [NM_139093]                                                                          | <b>5,199</b> |
| Tmem158    | Rattus norvegicus transmembrane protein 158 (Tmem158), mRNA [NM_057212]                                                                            | <b>5,198</b> |
| RGD1560187 | Rattus norvegicus similar to protein of fungal metazoan origin like (11.1 kD) (2C514) (LOC362641), mRNA [XM_342957]                                | <b>5,198</b> |
| Chrm3      | Rattus norvegicus cholinergic receptor, muscarinic 3 (Chrm3), mRNA [NM_012527]                                                                     | <b>5,196</b> |
| 0          | Unknown                                                                                                                                            | <b>5,195</b> |
| Tmem79     | Rattus norvegicus transmembrane protein 79 (Tmem79), mRNA [NM_001033896]                                                                           | <b>5,194</b> |
| 0          | AGENCOURT_31522257 NIH_MGC_269 Rattus norvegicus cDNA clone IMAGE:7460337 5', mRNA sequence [CV117922]                                             | <b>5,194</b> |
| Csrp2      | Rattus norvegicus cysteine and glycine-rich protein 2 (Csrp2), mRNA [NM_177425]                                                                    | <b>5,194</b> |
| Faim       | Rattus norvegicus Fas apoptotic inhibitory molecule (Faim), mRNA [NM_080895]                                                                       | <b>5,193</b> |
| Zfp51      | Rattus norvegicus zinc finger protein 51 (Zfp51), mRNA [NM_001107467]                                                                              | <b>5,193</b> |
| Apoh       | Rattus norvegicus apolipoprotein H (beta-2-glycoprotein I) (Apoh), mRNA [NM_001009626]                                                             | <b>5,192</b> |
| LOC688298  | Rattus norvegicus hypothetical protein LOC688298 (LOC688298), mRNA [NM_001143896]                                                                  | <b>5,192</b> |
| 0          | Unknown                                                                                                                                            | <b>5,192</b> |
| Kcnb2      | Rattus norvegicus potassium voltage gated channel, Shab-related subfamily, member 2 (Kcnb2), mRNA [NM_054000]                                      | <b>5,191</b> |
| 0          | Unknown                                                                                                                                            | <b>5,190</b> |
| Zfp105     | Rattus norvegicus zinc finger protein 105 (Zfp105), mRNA [NM_001012128]                                                                            | <b>5,190</b> |
| 0          | Uncharacterized protein [Source:UniProtKB/TrEMBL;Acc:D4ABH4] [ENSRNOT00000014695]                                                                  | <b>5,189</b> |
| Mtmr1      | Rattus norvegicus myotubularin related protein 1 (Mtmr1), mRNA [NM_001191725]                                                                      | <b>5,189</b> |
| Ednra      | Rattus norvegicus endothelin receptor type A (Ednra), mRNA [NM_012550]                                                                             | <b>5,189</b> |
| Slc39a7    | Rattus norvegicus solute carrier family 39 (zinc transporter), member 7 (Slc39a7), transcript variant 2, mRNA [NM_001008885]                       | <b>5,188</b> |
| LOC688310  | PREDICTED: Rattus norvegicus similar to CG5500-PA (LOC688310), mRNA [XM_001081793]                                                                 | <b>5,188</b> |
| 0          | Unknown                                                                                                                                            | <b>5,187</b> |
| Havcr2     | Rattus norvegicus hepatitis A virus cellular receptor 2 (Havcr2), mRNA [NM_001100762]                                                              | <b>5,187</b> |
| Mkln1      | Rattus norvegicus muskelin 1, intracellular mediator containing kelch motifs (Mkln1), mRNA [NM_031359]                                             | <b>5,186</b> |
| Nes        | Rattus norvegicus nestin (Nes), mRNA [NM_012987]                                                                                                   | <b>5,186</b> |
| Smug1      | Rattus norvegicus single-strand-selective monofunctional uracil-DNA glycosylase 1 (Smug1), mRNA [NM_177934]                                        | <b>5,186</b> |
| RGD1311578 | Rattus norvegicus similar to PRO1853 homolog (RGD1311578), mRNA [NM_001008318]                                                                     | <b>5,185</b> |
| Zfp131     | Rattus norvegicus zinc finger protein 131 (Zfp131), mRNA [NM_001100698]                                                                            | <b>5,184</b> |
| Smarcc1    | Rattus norvegicus SWI/SNF related, matrix associated, actin dependent regulator of chromatin, subfamily c, member 1 (Smarcc1), mRNA [NM_001106861] | <b>5,184</b> |
| 0          | Uncharacterized protein [Source:UniProtKB/TrEMBL;Acc:D4ADK1] [ENSRNOT00000046038]                                                                  | <b>5,183</b> |
| Fam92a1    | Uncharacterized protein [Source:UniProtKB/TrEMBL;Acc:D3ZP87] [ENSRNOT00000022249]                                                                  | <b>5,183</b> |
| 0          | Unknown                                                                                                                                            | <b>5,182</b> |

|            |                                                                                                                         |       |
|------------|-------------------------------------------------------------------------------------------------------------------------|-------|
| 0          | Unknown                                                                                                                 | 5,181 |
| Fkbp7      | Rattus norvegicus FK506 binding protein 7 (Fkbp7), mRNA [NM_001106485]                                                  | 5,181 |
| Cggbp1     | Rattus norvegicus CGG triplet repeat binding protein 1 (Cggbp1), mRNA [NM_001105900]                                    | 5,180 |
| 0          | Unknown                                                                                                                 | 5,180 |
| RGD1307465 | Rattus norvegicus similar to RIKEN cDNA 8430406I07 (RGD1307465), mRNA [NM_001009655]                                    | 5,178 |
| Tagln3     | Rattus norvegicus transgelin 3 (Tagln3), transcript variant 2, mRNA [NM_031676]                                         | 5,178 |
| Rps2-ps7   | PREDICTED: Rattus norvegicus similar to 40S ribosomal protein S2 (LOC688435), mRNA [XM_002725434]                       | 5,177 |
| Apobec2    | Rattus norvegicus apolipoprotein B mRNA editing enzyme, catalytic polypeptide-like 2 (Apobec2), mRNA [NM_001106883]     | 5,177 |
| Rbak       | Rattus norvegicus RB-associated KRAB zinc finger (Rbak), mRNA [NM_001191664]                                            | 5,175 |
| Vom1r48    | Rattus norvegicus vomeronasal 1 receptor 48 (Vom1r48), mRNA [NM_001008931]                                              | 5,175 |
| Tnnc1      | Rattus norvegicus troponin C type 1 (slow) (Tnnc1), mRNA [NM_001034105]                                                 | 5,175 |
| Slc43a3    | Rattus norvegicus solute carrier family 43, member 3 (Slc43a3), mRNA [NM_001107743]                                     | 5,175 |
| Slc44a4    | Rattus norvegicus solute carrier family 44, member 4 (Slc44a4), mRNA [NM_212541]                                        | 5,172 |
| 0          | Unknown                                                                                                                 | 5,172 |
| 0          | PREDICTED: Rattus norvegicus RGD1564086 (RGD1564086), mRNA [XM_001078704]                                               | 5,171 |
| 0          | Q6UX82_HUMAN (Q6UX82) Phospholipase inhibitor, partial (16%) [TC595358]                                                 | 5,171 |
| 0          | Rab3 GTPase-activating protein catalytic subunit [Source:UniProtKB/Swiss-Prot;Acc:P69735] [ENSRNOT00000005289]          | 5,170 |
| 0          | BF543486 UI-R-C3-sz-e-01-0-UI.r1 UI-R-C3 Rattus norvegicus cDNA clone UI-R-C3-sz-e-01-0-UI 5', mRNA sequence [BF543486] | 5,169 |
| Slc26a10   | solute carrier family 26 member 10 [Source:RefSeq peptide;Acc:NP_001128067] [ENSRNOT000000052288]                       | 5,169 |
| Olr165     | Rattus norvegicus olfactory receptor 165 (Olr165), mRNA [NM_001000172]                                                  | 5,169 |
| Ppil4      | peptidyl-prolyl cis-trans isomerase-like 4 [Source:RefSeq peptide;Acc:NP_001101927] [ENSRNOT000000021437]               | 5,169 |
| Wif1       | Rattus norvegicus Wnt inhibitory factor 1 (Wif1), mRNA [NM_053738]                                                      | 5,168 |
| Fzd6       | Rattus norvegicus frizzled homolog 6 (Drosophila) (Fzd6), mRNA [NM_001130536]                                           | 5,167 |
| Anapc7     | Rattus norvegicus anaphase promoting complex subunit 7 (Anapc7), mRNA [NM_001107142]                                    | 5,167 |
| Odz3       | Rattus norvegicus odz, odd Oz/ten-m homolog 3 (Drosophila) (Odz3), mRNA [NM_001169133]                                  | 5,166 |
| Btbd1      | Rattus norvegicus BTB (POZ) domain containing 1 (Btbd1), mRNA [NM_001011932]                                            | 5,166 |
| Parp8      | PREDICTED: Rattus norvegicus poly (ADP-ribose) polymerase family, member 8 (Parp8), mRNA [XM_001068789]                 | 5,166 |
| Agtr1a     | Rattus norvegicus angiotensin II receptor, type 1a (Agtr1a), mRNA [NM_030985]                                           | 5,165 |
| 0          | Unknown                                                                                                                 | 5,165 |
| Fshr       | Rattus norvegicus follicle stimulating hormone receptor (Fshr), mRNA [NM_199237]                                        | 5,164 |
| 0          | Unknown                                                                                                                 | 5,162 |
| Hapln4     | Rattus norvegicus hyaluronan and proteoglycan link protein 4 (Hapln4), mRNA [NM_001108398]                              | 5,161 |
| LOC684919  | PREDICTED: Rattus norvegicus similar to zinc finger protein 449 (LOC684919), mRNA [XM_001072469]                        | 5,161 |
| RGD1562381 | Uncharacterized protein [Source:UniProtKB/TrEMBL;Acc:D3ZM01] [ENSRNOT000000040565]                                      | 5,161 |

|            |                                                                                                                                                                                                   |       |
|------------|---------------------------------------------------------------------------------------------------------------------------------------------------------------------------------------------------|-------|
| Lin54      | Rattus norvegicus lin-54 homolog (C. elegans) (Lin54), mRNA [NM_001100564]                                                                                                                        | 5,161 |
| Leng8      | Rattus norvegicus leukocyte receptor cluster (LRC) member 8 (Leng8), mRNA [NM_001037790]                                                                                                          | 5,161 |
| Scand3     | Rattus norvegicus SCAN domain containing 3 (Scand3), mRNA [NM_001105924]                                                                                                                          | 5,160 |
| 0          | Unknown                                                                                                                                                                                           | 5,160 |
| Dak        | Rattus norvegicus dihydroxyacetone kinase 2 homolog (S. cerevisiae) (Dak), mRNA [NM_001039031]                                                                                                    | 5,160 |
| Ints10     | Rattus norvegicus integrator complex subunit 10 (Ints10), mRNA [NM_001134416]                                                                                                                     | 5,159 |
| Aen        | Rattus norvegicus apoptosis enhancing nuclease (Aen), mRNA [NM_001108487]                                                                                                                         | 5,158 |
| Otub2      | Rattus norvegicus OTU domain, ubiquitin aldehyde binding 2 (Otub2), mRNA [NM_001108053]                                                                                                           | 5,157 |
| Zfp319     | Rattus norvegicus zinc finger protein 319 (Zfp319), mRNA [NM_001170478]                                                                                                                           | 5,157 |
| Top2a      | DNA topoisomerase 2-alpha [Source:UniProtKB/Swiss-Prot;Acc:P41516] [ENSRNOT00000050725]                                                                                                           | 5,157 |
| Epc2       | Rattus norvegicus enhancer of polycomb homolog 2 (Drosophila) (Epc2), mRNA [NM_001108581]                                                                                                         | 5,157 |
| 0          | Rattus norvegicus chromosome 10, 7 clones, strain BN/SsNHsdMCW RNOR03214123, whole genome shotgun sequence [AABR03073170]                                                                         | 5,157 |
| Tcp1111    | Rattus norvegicus t-complex 11 like 1 (Tcp1111), mRNA [NM_001109202]                                                                                                                              | 5,156 |
| RGD1564952 | PREDICTED: Rattus norvegicus similar to zinc finger, RAN-binding domain containing 3 (RGD1564952), mRNA [XM_002728000]                                                                            | 5,155 |
| Surf6      | Rattus norvegicus surf6 (Surf6), mRNA [NM_001015014]                                                                                                                                              | 5,154 |
| 0          | Rattus norvegicus chromosome 20, 4 clones, strain BN/SsNHsdMCW RNOR03269132, whole genome shotgun sequence [AABR03116353]                                                                         | 5,154 |
| Mthfd2     | Rattus norvegicus methylenetetrahydrofolate dehydrogenase (NADP+ dependent) 2, methenyltetrahydrofolate cyclohydrolase (Mthfd2), nuclear gene encoding mitochondrial protein, mRNA [NM_001109398] | 5,154 |
| LOC679682  | Rattus norvegicus similar to ES cell-expressed Ras (LOC679682), mRNA [NM_001109375]                                                                                                               | 5,153 |
| 0          | Uncharacterized protein [Source:UniProtKB/TrEMBL;Acc:D3ZSV9] [ENSRNOT00000011770]                                                                                                                 | 5,153 |
| Pc         | Rattus norvegicus pyruvate carboxylase (Pc), nuclear gene encoding mitochondrial protein, mRNA [NM_012744]                                                                                        | 5,153 |
| Phgr1      | PREDICTED: Rattus norvegicus similar to RIKEN cDNA 1810007E14 (RGD1566202), mRNA [XM_001080765]                                                                                                   | 5,153 |
| Naprt1     | Rattus norvegicus nicotinate phosphoribosyltransferase domain containing 1 (Naprt1), mRNA [NM_207609]                                                                                             | 5,152 |
| LOC690000  | Uncharacterized protein [Source:UniProtKB/TrEMBL;Acc:D3ZWS2] [ENSRNOT00000020079]                                                                                                                 | 5,152 |
| Farsb      | Rattus norvegicus phenylalanyl-tRNA synthetase, beta subunit (Farsb), mRNA [NM_001004252]                                                                                                         | 5,152 |
| 0          | Unknown                                                                                                                                                                                           | 5,152 |
| RGD1306954 | Rattus norvegicus similar to RIKEN cDNA 1110004E09 (RGD1306954), mRNA [NM_001008288]                                                                                                              | 5,152 |
| 0          | Unknown                                                                                                                                                                                           | 5,152 |
| Clec1a     | Rattus norvegicus C-type lectin domain family 1, member a (Clec1a), mRNA [NM_001109253]                                                                                                           | 5,150 |
| Xrcc6bp1   | Rattus norvegicus XRCC6 binding protein 1 (Xrcc6bp1), mRNA [NM_001134466]                                                                                                                         | 5,150 |
| Rps24      | Rattus norvegicus ribosomal protein S24 (Rps24), mRNA [NM_031112]                                                                                                                                 | 5,149 |
| Sts        | Rattus norvegicus steroid sulfatase (Sts), mRNA [NM_012661]                                                                                                                                       | 5,149 |
| Svop       | Rattus norvegicus SV2 related protein (Svop), mRNA [NM_134404]                                                                                                                                    | 5,148 |
| Mrpl19     | Rattus norvegicus mitochondrial ribosomal protein L19 (Mrpl19), nuclear gene encoding mitochondrial protein, mRNA [NM_001029898]                                                                  | 5,148 |

|            |                                                                                                                                                 |       |
|------------|-------------------------------------------------------------------------------------------------------------------------------------------------|-------|
| Fcgr1a     | Rattus norvegicus Fc fragment of IgG, high affinity Ia, receptor (CD64) (Fcgr1a), mRNA [NM_001100836]                                           | 5,148 |
| 0          | Unknown                                                                                                                                         | 5,148 |
| Kif4b      | Uncharacterized protein [Source:UniProtKB/TrEMBL;Acc:D3ZYT4] [ENSRNOT00000006165]                                                               | 5,147 |
| Abcf2      | Rattus norvegicus ATP-binding cassette, subfamily F (GCN20), member 2 (Abcf2), nuclear gene encoding mitochondrial protein, mRNA [NM_001109666] | 5,147 |
| 0          | Unknown                                                                                                                                         | 5,147 |
| Lrrc48     | Rattus norvegicus leucine rich repeat containing 48 (Lrrc48), mRNA [NM_001013857]                                                               | 5,145 |
| Lpar2      | Rattus norvegicus lysophosphatidic acid receptor 2 (Lpar2), mRNA [NM_001109109]                                                                 | 5,145 |
| 0          | Unknown                                                                                                                                         | 5,144 |
| Obsl1      | Uncharacterized protein [Source:UniProtKB/TrEMBL;Acc:D3ZZ80] [ENSRNOT00000020673]                                                               | 5,144 |
| 0          | Unknown                                                                                                                                         | 5,142 |
| Rbm41      | Rattus norvegicus RNA binding motif protein 41 (Rbm41), mRNA [NM_001109420]                                                                     | 5,142 |
| 0          | AI555711 UI-R-C2p-qr-b-08-0-UI.s1 UI-R-C2p Rattus norvegicus cDNA clone UI-R-C2p-qr-b-08-0-UI 3', mRNA sequence [AI555711]                      | 5,142 |
| Optc       | Rattus norvegicus opticin (Optc), mRNA [NM_001107176]                                                                                           | 5,142 |
| Sik1       | Serine/threonine-protein kinase SIK1 [Source:UniProtKB/Swiss-Prot;Acc:Q9R1U5] [ENSRNOT00000001579]                                              | 5,140 |
| Pcyox1     | Rattus norvegicus prenylcysteine oxidase 1 (Pcyox1), mRNA [NM_145085]                                                                           | 5,140 |
| Zfp445     | Rattus norvegicus zinc finger protein 445 (Zfp445), mRNA [NM_001191802]                                                                         | 5,140 |
| Fam71f1    | Rattus norvegicus family with sequence similarity 71, member F1 (Fam71f1), mRNA [NM_001024324]                                                  | 5,140 |
| Olr921     | Rattus norvegicus olfactory receptor 921 (Olr921), mRNA [NM_001001385]                                                                          | 5,139 |
| Gpn2       | GPN-loop GTPase 2 [Source:UniProtKB/Swiss-Prot;Acc:D4A7C0] [ENSRNOT00000009275]                                                                 | 5,138 |
| Stbd1      | Rattus norvegicus starch binding domain 1 (Stbd1), mRNA [NM_001013988]                                                                          | 5,138 |
| Mixl1      | Rattus norvegicus Mix1 homeobox-like 1 (Xenopus laevis) (Mixl1), mRNA [NM_001105979]                                                            | 5,137 |
| Kcng3      | Rattus norvegicus potassium voltage-gated channel, subfamily G, member 3 (Kcng3), transcript variant 1, mRNA [NM_133426]                        | 5,137 |
| LOC691661  | Rattus norvegicus similar to hypothetical protein FLJ35105 (LOC297949), mRNA [XM_232841]                                                        | 5,136 |
| 0          | Uncharacterized protein [Source:UniProtKB/TrEMBL;Acc:D3ZRD1] [ENSRNOT00000013290]                                                               | 5,136 |
| Flt3       | Rattus norvegicus fms-related tyrosine kinase 3 (Flt3), mRNA [NM_001100822]                                                                     | 5,136 |
| Wdr55      | Rattus norvegicus WD repeat domain 55 (Wdr55), mRNA [NM_001017932]                                                                              | 5,136 |
| Lztf11     | Rattus norvegicus leucine zipper transcription factor-like 1 (Lztf11), mRNA [NM_001024266]                                                      | 5,135 |
| Trim36     | Rattus norvegicus tripartite motif-containing 36 (Trim36), mRNA [NM_001106147]                                                                  | 5,135 |
| RGD1561955 | Uncharacterized protein [Source:UniProtKB/TrEMBL;Acc:D3ZSZ6] [ENSRNOT00000058079]                                                               | 5,133 |
| Lamp1      | Rattus norvegicus lysosomal-associated membrane protein 1 (Lamp1), mRNA [NM_012857]                                                             | 5,132 |
| Oprd1      | Rattus norvegicus opioid receptor, delta 1 (Oprd1), mRNA [NM_012617]                                                                            | 5,131 |
| Neil1      | Rattus norvegicus nei endonuclease VIII-like 1 (E. coli) (Neil1), mRNA [NM_001025754]                                                           | 5,131 |
| Smyd3      | Rattus norvegicus SET and MYND domain containing 3 (Smyd3), mRNA [NM_001025762]                                                                 | 5,130 |

|              |                                                                                                                |              |
|--------------|----------------------------------------------------------------------------------------------------------------|--------------|
| Slc26a2      | Rattus norvegicus solute carrier family 26 (sulfate transporter), member 2 (Slc26a2), mRNA [NM_057127]         | <b>5,130</b> |
| Trim39       | Rattus norvegicus tripartite motif-containing 39 (Trim39), mRNA [NM_213562]                                    | <b>5,129</b> |
| 0            | Rattus norvegicus similar to hypothetical protein MGC18873 (LOC302398), mRNA [XM_228559]                       | <b>5,129</b> |
| Haus1        | Rattus norvegicus HAUS augmin-like complex, subunit 1 (Haus1), mRNA [NM_138864]                                | <b>5,129</b> |
| Trim67       | Rattus norvegicus tripartite motif-containing 67 (Trim67), mRNA [NM_001135715]                                 | <b>5,129</b> |
| Vamp5        | Rattus norvegicus vesicle-associated membrane protein 5 (Vamp5), mRNA [NM_053555]                              | <b>5,128</b> |
| 0            | Unknown                                                                                                        | <b>5,128</b> |
| LOC100359653 | PREDICTED: Rattus norvegicus rCG43168-like (LOC100359653), mRNA [XM_002728431]                                 | <b>5,128</b> |
| LOC690105    | PREDICTED: Rattus norvegicus hypothetical protein LOC690105 (LOC690105), mRNA [XM_002726579]                   | <b>5,127</b> |
| Cpa2         | Rattus norvegicus carboxypeptidase A2 (pancreatic) (Cpa2), mRNA [NM_001013083]                                 | <b>5,127</b> |
| Adat1        | Rattus norvegicus adenosine deaminase, tRNA-specific 1 (Adat1), mRNA [NM_001109611]                            | <b>5,126</b> |
| Zcchc9       | Rattus norvegicus zinc finger, CCHC domain containing 9 (Zcchc9), mRNA [NM_001013156]                          | <b>5,126</b> |
| LOC687696    | Rattus norvegicus similar to AMSH-family protein (LOC687696), mRNA [NM_001115048]                              | <b>5,125</b> |
| Hist1h2aa    | Rattus norvegicus histone cluster 1, H2aa (Hist1h2aa), mRNA [NM_021839]                                        | <b>5,125</b> |
| LOC691259    | Rattus norvegicus hypothetical protein LOC691259 (LOC691259), mRNA [NM_001109632]                              | <b>5,125</b> |
| Map3k6       | Rattus norvegicus mitogen-activated protein kinase kinase kinase 6 (Map3k6), mRNA [NM_001107909]               | <b>5,124</b> |
| Sars         | Rattus norvegicus seryl-tRNA synthetase (Sars), mRNA [NM_001007606]                                            | <b>5,124</b> |
| Tle2         | Rattus norvegicus transducin-like enhancer of split 2 (E(sp1) homolog, Drosophila) (Tle2), mRNA [NM_001039013] | <b>5,123</b> |
| Cacng5       | Rattus norvegicus calcium channel, voltage-dependent, gamma subunit 5 (Cacng5), mRNA [NM_080693]               | <b>5,122</b> |
| Ndfip1       | Rattus norvegicus Nedd4 family interacting protein 1 (Ndfip1), mRNA [NM_001013059]                             | <b>5,122</b> |
| Rhobtb1      | Rattus norvegicus Rho-related BTB domain containing 1 (Rhobtb1), mRNA [NM_001107622]                           | <b>5,122</b> |
| Hook3        | Rattus norvegicus hook homolog 3 (Drosophila) (Hook3), mRNA [NM_001136098]                                     | <b>5,121</b> |
| Clca4        | Rattus norvegicus chloride channel accessory 4 (Clca4), mRNA [NM_201419]                                       | <b>5,121</b> |
| RGD1312005   | Rattus norvegicus similar to DD1 (RGD1312005), mRNA [NM_001106144]                                             | <b>5,121</b> |
| LOC362710    | Rattus norvegicus hypothetical LOC362710 (LOC362710), mRNA [NM_001126372]                                      | <b>5,120</b> |
| Ankrd28      | Q505D1_MOUSE (Q505D1) Ankyrin repeat domain 28, partial (8%) [TC599514]                                        | <b>5,119</b> |
| Hpx          | Rattus norvegicus hemopexin (Hpx), mRNA [NM_053318]                                                            | <b>5,118</b> |
| 0            | Unknown                                                                                                        | <b>5,116</b> |
| 0            | Unknown                                                                                                        | <b>5,115</b> |
| 0            | Rattus norvegicus similar to KIAA1771 protein (LOC313388), mRNA [XM_242940]                                    | <b>5,115</b> |
| 0            | Unknown                                                                                                        | <b>5,114</b> |
| Dlk2         | Rattus norvegicus delta-like 2 homolog (Drosophila) (Dlk2), mRNA [NM_001108202]                                | <b>5,112</b> |
| 0            | tRNA-splicing endonuclease subunit Sen15 [Source:RefSeq peptide;Acc:NP_001099428] [ENSRNOT00000003226]         | <b>5,112</b> |
| Slc39a12     | Rattus norvegicus solute carrier family 39 (zinc transporter), member 12 (Slc39a12), mRNA [NM_001106124]       | <b>5,111</b> |

|            |                                                                                                                                                               |       |
|------------|---------------------------------------------------------------------------------------------------------------------------------------------------------------|-------|
| 0          | Unknown                                                                                                                                                       | 5,111 |
| Ccdc34     | Rattus norvegicus coiled-coil domain containing 34 (Ccdc34), mRNA [NM_001108587]                                                                              | 5,110 |
| Dnajc25    | Rattus norvegicus DnaJ (Hsp40) homolog, subfamily C, member 25 (Dnajc25), mRNA [NM_001025021]                                                                 | 5,110 |
| Epha2      | Rattus norvegicus Eph receptor A2 (Epha2), mRNA [NM_001108977]                                                                                                | 5,109 |
| 0          | Uncharacterized protein [Source:UniProtKB/TrEMBL;Acc:D4A886] [ENSRNOT00000052276]                                                                             | 5,109 |
| LOC678766  | PREDICTED: Rattus norvegicus similar to ras homolog gene family, member U (LOC678766), mRNA [XM_001053087]                                                    | 5,108 |
| 0          | Rattus norvegicus chromosome 7, 38 clones, strain BN/SsNHsdMCW RNOR03304491, whole genome shotgun sequence [AABR03059028]                                     | 5,107 |
| Ly9        | Rattus norvegicus lymphocyte antigen 9 (Ly9), mRNA [NM_001191673]                                                                                             | 5,107 |
| 0          | Unknown                                                                                                                                                       | 5,107 |
| Gamt       | Rattus norvegicus guanidinoacetate N-methyltransferase (Gamt), mRNA [NM_012793]                                                                               | 5,106 |
| 0          | Unknown                                                                                                                                                       | 5,106 |
| Rnf213     | PREDICTED: Rattus norvegicus ring finger protein 213 (Rnf213), mRNA [XM_001081768]                                                                            | 5,106 |
| Tubgcp2    | Rattus norvegicus tubulin, gamma complex associated protein 2 (Tubgcp2), mRNA [NM_001107560]                                                                  | 5,106 |
| 0          | RCG47285, isoform CRA_bUncharacterized protein [Source:UniProtKB/TrEMBL;Acc:D3ZEH6] [ENSRNOT00000024237]                                                      | 5,105 |
| Kcnmb4     | Rattus norvegicus potassium large conductance calcium-activated channel, subfamily M, beta member 4 (Kcnmb4), mRNA [NM_023960]                                | 5,104 |
| 0          | Unknown                                                                                                                                                       | 5,104 |
| Morn2      | Rattus norvegicus MORN repeat containing 2 (Morn2), transcript variant 1, mRNA [NM_001126086]                                                                 | 5,104 |
| Alg5       | Rattus norvegicus asparagine-linked glycosylation 5, dolichyl-phosphate beta-glucosyltransferase homolog ( <i>S. cerevisiae</i> ) (Alg5), mRNA [NM_001025407] | 5,104 |
| RGD1566215 | Rattus norvegicus similar to Coatomer gamma-2 subunit (Gamma-2 coat protein) (Gamma-2 COP) (RGD1566215), mRNA [NM_001106929]                                  | 5,103 |
| Efha1      | Rattus norvegicus EF-hand domain family, member A1 (Efha1), mRNA [NM_134396]                                                                                  | 5,103 |
| Rps17      | Rattus norvegicus ribosomal protein S17 (Rps17), mRNA [NM_017152]                                                                                             | 5,103 |
| Cbx3       | Rattus norvegicus chromobox homolog 3 (HP1 gamma homolog, <i>Drosophila</i> ) (Cbx3), mRNA [NM_001008313]                                                     | 5,103 |
| Rdh8       | Rattus norvegicus retinol dehydrogenase 8 (all-trans) (Rdh8), mRNA [NM_001168593]                                                                             | 5,102 |
| RGD1563441 | Rattus norvegicus similar to RIKEN cDNA A030009H04 (RGD1563441), mRNA [NM_001126292]                                                                          | 5,102 |
| Vps4b      | Rattus norvegicus vacuolar protein sorting 4 homolog B ( <i>S. cerevisiae</i> ) (Vps4b), mRNA [NM_001025716]                                                  | 5,102 |
| Egln2      | Rattus norvegicus EGL nine homolog 2 ( <i>C. elegans</i> ) (Egln2), mRNA [NM_001004083]                                                                       | 5,099 |
| Usp43      | Rattus norvegicus ubiquitin specific peptidase 43 (Usp43), mRNA [NM_001100968]                                                                                | 5,099 |
| Dcaf12l1   | Rattus norvegicus DDB1 and CUL4 associated factor 12-like 1 (Dcaf12l1), mRNA [NM_001107941]                                                                   | 5,099 |
| 0          | Unknown                                                                                                                                                       | 5,098 |
| 0          | Unknown                                                                                                                                                       | 5,098 |
| Rpusd1     | Rattus norvegicus RNA pseudouridylate synthase domain containing 1 (Rpusd1), mRNA [NM_001105774]                                                              | 5,098 |
| Cntnap5    | Rattus norvegicus contactin associated protein-like 5 (Cntnap5), mRNA [NM_001047866]                                                                          | 5,097 |
| 0          | Mast cell protease 1-like 2 [Source:UniProtKB/TrEMBL;Acc:Q6IE56] [ENSRNOT00000038253]                                                                         | 5,097 |

|              |                                                                                                                                                          |              |
|--------------|----------------------------------------------------------------------------------------------------------------------------------------------------------|--------------|
| Vwa2         | PREDICTED: Rattus norvegicus von Willebrand factor A domain containing 2 (Vwa2), miscRNA [XR_008134]                                                     | <b>5,097</b> |
| LOC680711    | PREDICTED: Rattus norvegicus hypothetical protein LOC680711 (LOC680711), mRNA [XM_001056892]                                                             | <b>5,095</b> |
| 0            | Nipped-B homolog (Drosophila)Uncharacterized protein [Source:UniProtKB/TrEMBL;Acc:D3ZG77] [ENSRNOT00000021181]                                           | <b>5,093</b> |
| Hexdc        | Rattus norvegicus hexosaminidase (glycosyl hydrolase family 20, catalytic domain) containing (Hexdc), mRNA [NM_001142562]                                | <b>5,093</b> |
| Paip1        | Rattus norvegicus poly(A) binding protein interacting protein 1 (Paip1), mRNA [NM_001108937]                                                             | <b>5,093</b> |
| 0            | Uncharacterized protein [Source:UniProtKB/TrEMBL;Acc:D4A1S8] [ENSRNOT00000046898]                                                                        | <b>5,092</b> |
| Ube2c        | Rattus norvegicus ubiquitin-conjugating enzyme E2C (Ube2c), mRNA [NM_001106542]                                                                          | <b>5,090</b> |
| Fbxl4        | Rattus norvegicus F-box and leucine-rich repeat protein 4 (Fbxl4), mRNA [NM_001107919]                                                                   | <b>5,090</b> |
| 0            | Unknown                                                                                                                                                  | <b>5,090</b> |
| RGD1563170   | PREDICTED: Rattus norvegicus RGD1563170 (RGD1563170), mRNA [XM_001054677]                                                                                | <b>5,089</b> |
| LOC100233176 | Rattus norvegicus hypothetical protein LOC100233176 (LOC100233176), transcript variant 2, mRNA [NM_001142942]                                            | <b>5,089</b> |
| Retsat       | Rattus norvegicus retinol saturase (all trans retinol 13,14 reductase) (Retsat), mRNA [NM_145084]                                                        | <b>5,089</b> |
| Ncoa2        | Rattus norvegicus nuclear receptor coactivator 2 (Ncoa2), mRNA [NM_031822]                                                                               | <b>5,088</b> |
| Klk12        | Rattus norvegicus kallikrein related-peptidase 12 (Klk12), mRNA [NM_001107508]                                                                           | <b>5,087</b> |
| RGD1563015   | Rattus norvegicus RGD1563015 (RGD1563015), mRNA [NM_001134627]                                                                                           | <b>5,087</b> |
| Fez2         | Rattus norvegicus fasciculation and elongation protein zeta 2 (zygin II), mRNA (cDNA clone MGC:112579 IMAGE:7128839), complete cds. [BC100060]           | <b>5,087</b> |
| Nudcd1       | Rattus norvegicus NudC domain containing 1 (Nudcd1), mRNA [NM_001130561]                                                                                 | <b>5,087</b> |
| Tomm40       | Rattus norvegicus translocase of outer mitochondrial membrane 40 homolog (yeast) (Tomm40), nuclear gene encoding mitochondrial protein, mRNA [NM_212520] | <b>5,087</b> |
| RGD1564906   | Glutathione S-transferase [Source:UniProtKB/TrEMBL;Acc:D3ZBD6] [ENSRNOT00000000233]                                                                      | <b>5,086</b> |
| 0            | Unknown                                                                                                                                                  | <b>5,086</b> |
| Pcyt2        | Rattus norvegicus phosphate cytidylyltransferase 2, ethanolamine (Pcyt2), mRNA [NM_053568]                                                               | <b>5,086</b> |
| 0            | Unknown                                                                                                                                                  | <b>5,085</b> |
| Ttc3         | Rattus norvegicus tetratricopeptide repeat domain 3 (Ttc3), mRNA [NM_001108315]                                                                          | <b>5,084</b> |
| Gpr113       | Rattus norvegicus G protein-coupled receptor 113 (Gpr113), mRNA [NM_001106712]                                                                           | <b>5,083</b> |
| RGD1307225   | Rattus norvegicus similar to MEGF6 (RGD1307225), mRNA [NM_001107663]                                                                                     | <b>5,083</b> |
| 0            | Unknown                                                                                                                                                  | <b>5,083</b> |
| 0            | Q8K0W6_MOUSE (Q8K0W6) LOC545728 protein (Fragment), partial (29%) [TC590048]                                                                             | <b>5,083</b> |
| Ctxn3        | Rattus norvegicus cortexin 3 (Ctxn3), mRNA [NM_001134696]                                                                                                | <b>5,082</b> |
| Snx32        | PREDICTED: Rattus norvegicus sorting nexin 32 (Snx32), mRNA [XM_001073782]                                                                               | <b>5,082</b> |
| Gal          | Rattus norvegicus galanin prepropeptide (Gal), mRNA [NM_033237]                                                                                          | <b>5,081</b> |
| RGD1565657   | similar to germ cell-less (RGD1565657), mRNA [Source:RefSeq DNA;Acc:NM_001106728] [ENSRNOT00000041559]                                                   | <b>5,081</b> |
| 0            | Unknown                                                                                                                                                  | <b>5,080</b> |



|            |                                                                                                                                                             |       |
|------------|-------------------------------------------------------------------------------------------------------------------------------------------------------------|-------|
| Mmp17      | Rattus norvegicus matrix metallopeptidase 17 (Mmp17), mRNA [NM_001105925]                                                                                   | 5,080 |
| RGD1564171 | Rattus norvegicus RGD1564171 (RGD1564171), mRNA [NM_001109186]                                                                                              | 5,080 |
| 0          | Uncharacterized protein [Source:UniProtKB/TrEMBL;Acc:D3ZSU9] [ENSRNOT00000050431]                                                                           | 5,080 |
| Spink2     | Rattus norvegicus serine peptidase inhibitor, Kazal type 2 (acrosin-trypsin inhibitor) (Spink2), mRNA [NM_001008870]                                        | 5,080 |
| 0          | Uncharacterized protein [Source:UniProtKB/TrEMBL;Acc:D3ZJ17] [ENSRNOT00000006594]                                                                           | 5,080 |
| Fam176b    | Rattus norvegicus family with sequence similarity 176, member B (Fam176b), mRNA [NM_001108679]                                                              | 5,080 |
| Fam183b    | Uncharacterized protein [Source:UniProtKB/TrEMBL;Acc:D3Z8P9] [ENSRNOT00000003841]                                                                           | 5,079 |
| Stard4     | Rattus norvegicus StAR-related lipid transfer (START) domain containing 4 (Stard4), mRNA [NM_001106159]                                                     | 5,079 |
| RGD1564325 | 40S ribosomal protein S24 [Source:UniProtKB/TrEMBL;Acc:D3ZFZ8] [ENSRNOT00000047252]                                                                         | 5,079 |
| Dohh       | Rattus norvegicus deoxyhypusine hydroxylase/monooxygenase (Dohh), mRNA [NM_001025006]                                                                       | 5,078 |
| 0          | Unknown                                                                                                                                                     | 5,077 |
| Lrit1      | Leucine-rich repeat, immunoglobulin-like domain and transmembrane domain-containing protein 1 [Source:UniProtKB/Swiss-Prot;Acc:Q9JMH2] [ENSRNOT00000017773] | 5,076 |
| 0          | Uncharacterized protein [Source:UniProtKB/TrEMBL;Acc:D4A3R8] [ENSRNOT00000049208]                                                                           | 5,076 |
| N5         | Rattus norvegicus DNA binding protein N5 (N5), mRNA [NM_022857]                                                                                             | 5,076 |
| Axl        | Rattus norvegicus Axl receptor tyrosine kinase (Axl), transcript variant 1, mRNA [NM_031794]                                                                | 5,076 |
| Tmem57     | Rattus norvegicus transmembrane protein 57 (Tmem57), mRNA [NM_001025699]                                                                                    | 5,076 |
| Cdk105     | Rattus norvegicus CDK105 protein (Cdk105), mRNA [NM_134415]                                                                                                 | 5,076 |
| RGD1563425 | Rattus norvegicus similar to FLJ35784 protein (RGD1563425), mRNA [NM_001109059]                                                                             | 5,075 |
| Prkcsh     | Rattus norvegicus protein kinase C substrate 80K-H (Prkcsh), mRNA [NM_001106806]                                                                            | 5,075 |
| Pdgfb      | Rattus norvegicus platelet-derived growth factor beta polypeptide (simian sarcoma viral (v-sis) oncogene homolog) (Pdgfb), mRNA [NM_031524]                 | 5,075 |
| 0          | Unknown                                                                                                                                                     | 5,072 |
| 0          | Rattus norvegicus similar to expressed sequence AI850305 (LOC314660), mRNA [XM_234947]                                                                      | 5,072 |
| LOC690725  | PREDICTED: Rattus norvegicus hypothetical protein LOC690725 (LOC690725), mRNA [XM_001075387]                                                                | 5,072 |
| Tmem107    | Rattus norvegicus transmembrane protein 107 (Tmem107), mRNA [NM_001109648]                                                                                  | 5,072 |
| 0          | Rattus norvegicus similar to glyceraldehyde-3-phosphate dehydrogenase (phosphorylating) (EC 1.2.1.12) - mouse (LOC308706), mRNA [XM_218761]                 | 5,072 |
| Brd1       | Rattus norvegicus bromodomain containing 1 (Brd1), mRNA [NM_001108103]                                                                                      | 5,071 |
| 0          | Uncharacterized protein [Source:UniProtKB/TrEMBL;Acc:D3ZDE9] [ENSRNOT00000041674]                                                                           | 5,070 |
| Fxc1       | Rattus norvegicus fractured callus expressed transcript 1 (Fxc1), mRNA [NM_053371]                                                                          | 5,070 |
| LOC296778  | Rattus norvegicus similar to RIKEN cDNA 4933431D05 (LOC296778), mRNA [XM_216072]                                                                            | 5,070 |
| Kidins220  | Rattus norvegicus kinase D-interacting substrate 220 (Kidins220), mRNA [NM_053795]                                                                          | 5,069 |
| Tspan11    | Rattus norvegicus tetraspanin 11 (Tspan11), mRNA [NM_001024262]                                                                                             | 5,068 |
| Nup62      | Rattus norvegicus nucleoporin 62 (Nup62), mRNA [NM_023098]                                                                                                  | 5,068 |

|            |                                                                                                                                                                                                   |              |
|------------|---------------------------------------------------------------------------------------------------------------------------------------------------------------------------------------------------|--------------|
| Stk35      | Rattus norvegicus serine/threonine kinase 35 (Stk35), mRNA [NM_001107773]                                                                                                                         | <b>5,067</b> |
| Eral1      | Rattus norvegicus Era (G-protein)-like 1 (E. coli) (Eral1), mRNA [NM_001013229]                                                                                                                   | <b>5,067</b> |
| Saps2      | Rattus norvegicus SAPS domain family, member 2 (Saps2), mRNA [NM_001106789]                                                                                                                       | <b>5,067</b> |
| Trub1      | Rattus norvegicus TruB pseudouridine (psi) synthase homolog 1 (E. coli) (Trub1), mRNA [NM_001012173]                                                                                              | <b>5,067</b> |
| Anp32b     | Rattus norvegicus acidic (leucine-rich) nuclear phosphoprotein 32 family, member B (Anp32b), mRNA [NM_131911]                                                                                     | <b>5,065</b> |
| RGD1564048 | PREDICTED: Rattus norvegicus similar to Protein C20orf46 (RGD1564048), mRNA [XM_001060786]                                                                                                        | <b>5,062</b> |
| Afap111    | Rattus norvegicus actin filament associated protein 1-like 1 (Afap111), mRNA [NM_001106142]                                                                                                       | <b>5,061</b> |
| Pramef12   | PREDICTED: Rattus norvegicus PRAME family member 12 (Pramef12), mRNA [XM_001077034]                                                                                                               | <b>5,061</b> |
| Ngef       | Rattus norvegicus neuronal guanine nucleotide exchange factor (Ngef), mRNA [NM_001136241]                                                                                                         | <b>5,060</b> |
| Secisbp2   | Rattus norvegicus SECIS binding protein 2 (Secisbp2), mRNA [NM_024002]                                                                                                                            | <b>5,057</b> |
| Slc7a15    | Rattus norvegicus solute carrier family 7 (cationic amino acid transporter, y+ system), member 15 (Slc7a15), mRNA [NM_001106714]                                                                  | <b>5,057</b> |
| Vom2r72    | Rattus norvegicus vomeronasal 2 receptor, 72 (Vom2r72), mRNA [NM_001099517]                                                                                                                       | <b>5,056</b> |
| Pi4k2b     | Rattus norvegicus phosphatidylinositol 4-kinase type 2 beta (Pi4k2b), mRNA [NM_001005883]                                                                                                         | <b>5,055</b> |
| Gpsm2      | Rattus norvegicus G-protein signaling modulator 2 (AGS3-like, C. elegans) (Gpsm2), mRNA [NM_001191962]                                                                                            | <b>5,055</b> |
| RGD1563159 | Rattus norvegicus RGD1563159 (RGD1563159), mRNA [NM_001108428]                                                                                                                                    | <b>5,054</b> |
| LOC689741  | PREDICTED: Rattus norvegicus similar to Der1-like domain family, member 1 (LOC689741), mRNA [XM_001071836]                                                                                        | <b>5,054</b> |
| Nrbf2      | Rattus norvegicus nuclear receptor binding factor 2 (Nrbf2), mRNA [NM_022186]                                                                                                                     | <b>5,054</b> |
| Scube1     | Rattus norvegicus signal peptide, CUB domain, EGF-like 1 (Scube1), mRNA [NM_001134884]                                                                                                            | <b>5,052</b> |
| RGD1307947 | Rattus norvegicus similar to RIKEN cDNA C430008C19 (RGD1307947), mRNA [NM_001014083]                                                                                                              | <b>5,051</b> |
| Myh11      | Rattus norvegicus myosin, heavy chain 11, smooth muscle (Myh11), mRNA [NM_001170600]                                                                                                              | <b>5,051</b> |
| Cog4       | Rattus norvegicus component of oligomeric golgi complex 4 (Cog4), mRNA [NM_001108449]                                                                                                             | <b>5,051</b> |
| 0          | Unknown                                                                                                                                                                                           | <b>5,049</b> |
| LOC685007  | PREDICTED: Rattus norvegicus similar to unc-93 homolog A (LOC685007), mRNA [XM_001061886]                                                                                                         | <b>5,049</b> |
| Ankrd27    | Uncharacterized protein [Source:UniProtKB/TrEMBL;Acc:D3ZBZ8] [ENSRNOT00000017669]                                                                                                                 | <b>5,047</b> |
| Rnf219     | Rattus norvegicus ring finger protein 219 (Rnf219), mRNA [NM_001108389]                                                                                                                           | <b>5,045</b> |
| Mt3        | Rattus norvegicus metallothionein 3 (Mt3), mRNA [NM_053968]                                                                                                                                       | <b>5,045</b> |
| Bdh2       | Rattus norvegicus 3-hydroxybutyrate dehydrogenase, type 2 (Bdh2), mRNA [NM_001106473]                                                                                                             | <b>5,045</b> |
| 0          | Unknown                                                                                                                                                                                           | <b>5,044</b> |
| 0          | Unknown                                                                                                                                                                                           | <b>5,043</b> |
| Rab44      | Uncharacterized protein [Source:UniProtKB/TrEMBL;Acc:D4A226] [ENSRNOT00000036899]                                                                                                                 | <b>5,042</b> |
| LOC679404  | PREDICTED: Rattus norvegicus similar to spermatogenesis associated glutamate (E)-rich protein 4d (LOC679404), mRNA [XM_001056196]                                                                 | <b>5,042</b> |
| Mthfd2     | Rattus norvegicus methylenetetrahydrofolate dehydrogenase (NADP+ dependent) 2, methenyltetrahydrofolate cyclohydrolase (Mthfd2), nuclear gene encoding mitochondrial protein, mRNA [NM_001109398] | <b>5,041</b> |
| Gtf2ird1   | Rattus norvegicus GTF2I repeat domain containing 1 (Gtf2ird1), mRNA [NM_001001504]                                                                                                                | <b>5,041</b> |

|            |                                                                                                                                                |              |
|------------|------------------------------------------------------------------------------------------------------------------------------------------------|--------------|
| Csf3r      | Rattus norvegicus colony stimulating factor 3 receptor (granulocyte) (Csf3r), mRNA [NM_001106685]                                              | <b>5,041</b> |
| Sult4a1    | Rattus norvegicus sulfotransferase family 4A, member 1 (Sult4a1), mRNA [NM_031641]                                                             | <b>5,040</b> |
| Zfp7       | Rattus norvegicus zinc finger protein 7 (Zfp7), mRNA [NM_001142757]                                                                            | <b>5,040</b> |
| Galnt10    | Rattus norvegicus UDP-N-acetyl-alpha-D-galactosamine:polypeptide N-acetylgalactosaminyltransferase 10 (GalNAc-T10) (Galnt10), mRNA [NM_130742] | <b>5,039</b> |
| LOC293589  | Rattus norvegicus TL0AAA51YB05 mRNA sequence. [FQ212842]                                                                                       | <b>5,038</b> |
| 0          | Unknown                                                                                                                                        | <b>5,038</b> |
| RGD1560073 | Uncharacterized protein [Source:UniProtKB/TrEMBL;Acc:D3ZCN9] [ENSRNOT00000043250]                                                              | <b>5,034</b> |
| 0          | Uncharacterized protein [Source:UniProtKB/TrEMBL;Acc:D3ZAL9] [ENSRNOT00000068454]                                                              | <b>5,034</b> |
| Mrps26     | Rattus norvegicus mitochondrial ribosomal protein S26 (Mrps26), nuclear gene encoding mitochondrial protein, mRNA [NM_001013206]               | <b>5,033</b> |
| Papss1     | Rattus norvegicus 3'-phosphoadenosine 5'-phosphosulfate synthase 1 (Papss1), mRNA [NM_001106471]                                               | <b>5,033</b> |
| Bwk1       | Rattus norvegicus Bwk1 leukemia-related gene (Bwk1), mRNA [NM_198743]                                                                          | <b>5,032</b> |
| Fn1        | Rattus norvegicus fibronectin 1 (Fn1), mRNA [NM_019143]                                                                                        | <b>5,032</b> |
| Gpt        | Rattus norvegicus glutamic-pyruvate transaminase (alanine aminotransferase) (Gpt), mRNA [NM_031039]                                            | <b>5,030</b> |
| lfrd2      | Rattus norvegicus interferon-related developmental regulator 2 (lfrd2), mRNA [NM_001047871]                                                    | <b>5,029</b> |
| Slc9a4     | Rattus norvegicus solute carrier family 9 (sodium/hydrogen exchanger), member 4 (Slc9a4), mRNA [NM_173098]                                     | <b>5,029</b> |
| Cybb       | Rattus norvegicus cytochrome b-245, beta polypeptide (Cybb), mRNA [NM_023965]                                                                  | <b>5,028</b> |
| 0          | myoneurin [Source:RefSeq peptide;Acc:NP_001012178] [ENSRNOT00000058909]                                                                        | <b>5,028</b> |
| Smptb      | Rattus norvegicus polypyrimidine tract-binding protein (Smptb), mRNA [NM_182818]                                                               | <b>5,027</b> |
| Rad51ap1   | Rattus norvegicus RAD51 associated protein 1 (Rad51ap1), mRNA [NM_001079711]                                                                   | <b>5,026</b> |
| Wdr44      | PREDICTED: Rattus norvegicus WD repeat domain 44 (Wdr44), mRNA [XM_001061437]                                                                  | <b>5,025</b> |
| Puf60      | Rattus norvegicus poly-U binding splicing factor 60 (Puf60), mRNA [NM_001191880]                                                               | <b>5,024</b> |
| LOC690269  | PREDICTED: Rattus norvegicus hypothetical protein LOC690269 (LOC690269), mRNA [XM_002727149]                                                   | <b>5,024</b> |
| LOC503192  | Zinc finger protein 6 [Source:UniProtKB/TrEMBL;Acc:P97662] [ENSRNOT00000019204]                                                                | <b>5,024</b> |
| Vps72      | Rattus norvegicus vacuolar protein sorting 72 homolog (S. cerevisiae) (Vps72), mRNA [NM_001107695]                                             | <b>5,022</b> |
| RGD1561635 | PREDICTED: Rattus norvegicus similar to 40S ribosomal protein S17 (RGD1561635), mRNA [XM_002724878]                                            | <b>5,021</b> |
| Scrib      | Rattus norvegicus scribbled homolog (Drosophila) (Scrib), mRNA [NM_001191879]                                                                  | <b>5,020</b> |
| Slc30a1    | Rattus norvegicus solute carrier family 30 (zinc transporter), member 1 (Slc30a1), mRNA [NM_022853]                                            | <b>5,020</b> |
| Ehd1       | Rattus norvegicus EH-domain containing 1 (Ehd1), mRNA [NM_001011939]                                                                           | <b>5,019</b> |
| Magee1     | Rattus norvegicus melanoma antigen, family E, 1 (Magee1), mRNA [NM_001079891]                                                                  | <b>5,019</b> |
| RGD1306001 | Rattus norvegicus similar to 2210021J22Rik protein (RGD1306001), mRNA [NM_001130696]                                                           | <b>5,018</b> |
| Bspry      | Rattus norvegicus B-box and SPRY domain containing (Bspry), mRNA [NM_022261]                                                                   | <b>5,018</b> |
| 0          | Unknown                                                                                                                                        | <b>5,017</b> |
| Nrtn       | Rattus norvegicus neurturin (Nrtn), mRNA [NM_053399]                                                                                           | <b>5,017</b> |

|           |                                                                                                                                                                                                    |              |
|-----------|----------------------------------------------------------------------------------------------------------------------------------------------------------------------------------------------------|--------------|
| 0         | Unknown                                                                                                                                                                                            | <b>5,016</b> |
| Siat7E    | PREDICTED: Rattus norvegicus sialyltransferase 7E (Siat7E), mRNA [XM_001078153]                                                                                                                    | <b>5,016</b> |
| 0         | Uncharacterized protein [Source:UniProtKB/TrEMBL;Acc:D3Z8Y2] [ENSRNOT00000064614]                                                                                                                  | <b>5,015</b> |
| 0         | Uncharacterized protein [Source:UniProtKB/TrEMBL;Acc:D4AEI9] [ENSRNOT00000034494]                                                                                                                  | <b>5,014</b> |
| Bex1      | Rattus norvegicus brain expressed, X-linked 1 (Bex1), mRNA [NM_001037365]                                                                                                                          | <b>5,014</b> |
| 0         | Ankyrin repeat and SOCS box protein 14 [Source:UniProtKB/Swiss-Prot;Acc:P0C927] [ENSRNOT00000017847]                                                                                               | <b>5,014</b> |
| Rock1     | Rattus norvegicus Rho-associated coiled-coil containing protein kinase 1 (Rock1), mRNA [NM_031098]                                                                                                 | <b>5,013</b> |
| 0         | Unknown                                                                                                                                                                                            | <b>5,013</b> |
| Tmem121   | Uncharacterized protein [Source:UniProtKB/TrEMBL;Acc:D3ZMR5] [ENSRNOT00000006872]                                                                                                                  | <b>5,012</b> |
| Sec16b    | Rattus norvegicus SEC16 homolog B (S. cerevisiae) (Sec16b), mRNA [NM_053571]                                                                                                                       | <b>5,012</b> |
| Cacybp    | Rattus norvegicus calcyclin binding protein (Cacybp), mRNA [NM_001004208]                                                                                                                          | <b>5,012</b> |
| Itpripl1  | Rattus norvegicus inositol 1,4,5-triphosphate receptor interacting protein-like 1 (Itpripl1), mRNA [NM_001025043]                                                                                  | <b>5,011</b> |
| 0         | Unknown                                                                                                                                                                                            | <b>5,010</b> |
| Mat2a     | Rattus norvegicus methionine adenosyltransferase II, alpha (Mat2a), mRNA [NM_134351]                                                                                                               | <b>5,010</b> |
| Rpl23     | Rattus norvegicus ribosomal protein L23 (Rpl23), mRNA [NM_001007599]                                                                                                                               | <b>5,009</b> |
| Chrne     | Rattus norvegicus cholinergic receptor, nicotinic, epsilon (Chrne), mRNA [NM_017194]                                                                                                               | <b>5,009</b> |
| Dync1i2   | Rattus norvegicus dynein cytoplasmic 1 intermediate chain 2 (Dync1i2), mRNA [NM_053880]                                                                                                            | <b>5,009</b> |
| 0         | Unknown                                                                                                                                                                                            | <b>5,009</b> |
| Tomm6     | RCG43475Uncharacterized protein [Source:UniProtKB/TrEMBL;Acc:D3ZJS3] [ENSRNOT00000018959]                                                                                                          | <b>5,009</b> |
| Snx7      | Rattus norvegicus sorting nexin 7 (Snx7), mRNA [NM_001012083]                                                                                                                                      | <b>5,008</b> |
| Sec24b    | Rattus norvegicus SEC24 family, member B (S. cerevisiae) (Sec24b), mRNA [NM_001106474]                                                                                                             | <b>5,008</b> |
| LOC688302 | PREDICTED: Rattus norvegicus similar to spermatogenesis associated glutamate (E)-rich protein 4d (LOC688302), partial mRNA [XM_002730119]                                                          | <b>5,008</b> |
| 0         | Uncharacterized protein [Source:UniProtKB/TrEMBL;Acc:D4A621] [ENSRNOT00000064915]                                                                                                                  | <b>5,007</b> |
| Myo1b     | Rattus norvegicus myosin Ib (Myo1b), mRNA [NM_053986]                                                                                                                                              | <b>5,007</b> |
| Pla2g15   | Rattus norvegicus phospholipase A2, group XV (Pla2g15), mRNA [NM_001004277]                                                                                                                        | <b>5,007</b> |
| Nasp      | Rattus norvegicus nuclear autoantigenic sperm protein (histone-binding) (Nasp), mRNA [NM_001005543]                                                                                                | <b>5,006</b> |
| Klc4      | Rattus norvegicus kinesin light chain 4 (Klc4), mRNA [NM_001009601]                                                                                                                                | <b>5,006</b> |
| 0         | Unknown                                                                                                                                                                                            | <b>5,004</b> |
| Rplp0     | Rattus norvegicus ribosomal protein, large, P0 (Rplp0), mRNA [NM_022402]                                                                                                                           | <b>5,004</b> |
| 0         | Uncharacterized protein [Source:UniProtKB/TrEMBL;Acc:D3ZPD3] [ENSRNOT00000056348]                                                                                                                  | <b>5,003</b> |
| Kifap3    | Rattus norvegicus kinesin-associated protein 3 (Kifap3), mRNA [NM_001105964]                                                                                                                       | <b>5,003</b> |
| Prg4      | Rattus norvegicus proteoglycan 4, (megakaryocyte stimulating factor, articular superficial zone protein, camptodactyly, arthropathy, coxa vara, pericarditis syndrome) (Prg4), mRNA [NM_001105962] | <b>5,003</b> |

|        |                                                                                                      |       |
|--------|------------------------------------------------------------------------------------------------------|-------|
| 0      | Unknown                                                                                              | 5,003 |
| Tceal8 | Rattus norvegicus transcription elongation factor A (SII)-like 8 (Tceal8), mRNA [NM_001014275]       | 5,001 |
| Hs3st5 | Rattus norvegicus heparan sulfate (glucosamine) 3-O-sulfotransferase 5 (Hs3st5), mRNA [NM_001106392] | 5,000 |
