# Supplementary material for: The RNA-Binding Protein hnRNP K Mediates the Effect of BDNF on Dendritic mRNA Metabolism and Regulates Synaptic NMDA Receptors in Hippocampal Neurons
Source: PubMed Central journal article supplement (PMC5732018; doi:10.1523/eneuro.0268-17.2017), 2017-12-12
Supplement: sup_enu-eN-NWR-0268-17-s05.pdf [file sup_enu-eN-NWR-0268-17-s05.pdf]

**Table 1-2 - Biological processes associated with mRNAs co-immunoprecipitated with hnRNP K as assessed by Gene Ontology**

| GO biological process                                                       | Rattus norvegicus<br>(reference list) | uploaded list | (expected) | (over/under) | (fold enrichment) | (P-value) |
|-----------------------------------------------------------------------------|---------------------------------------|---------------|------------|--------------|-------------------|-----------|
| glutamate receptor signaling pathway (GO:0007215)                           | 44                                    | 39            | 17.26      | +            | 2.26              | 3.81E-02  |
| amino acid transport (GO:0006865)                                           | 90                                    | 76            | 35.31      | +            | 2.15              | 1.46E-05  |
| synapse assembly (GO:0007416)                                               | 51                                    | 43            | 20.01      | +            | 2.15              | 4.35E-02  |
| dendrite morphogenesis (GO:0048813)                                         | 57                                    | 48            | 22.36      | +            | 2.15              | 1.34E-02  |
| dendrite development (GO:0016358)                                           | 106                                   | 89            | 41.58      | +            | 2.14              | 8.56E-07  |
| regulation of neuronal synaptic plasticity (GO:0048168)                     | 71                                    | 59            | 27.85      | +            | 2.12              | 1.46E-03  |
| regulation of synaptic plasticity (GO:0048167)                              | 181                                   | 148           | 71.00      | +            | 2.08              | 6.28E-12  |
| forebrain cell migration (GO:0021885)                                       | 70                                    | 57            | 27.46      | +            | 2.08              | 4.35E-03  |
| regulation of dendrite morphogenesis (GO:0048814)                           | 94                                    | 76            | 36.88      | +            | 2.06              | 8.66E-05  |
| telencephalon cell migration (GO:0022029)                                   | 67                                    | 54            | 26.28      | +            | 2.05              | 1.14E-02  |
| positive regulation of dendrite development (GO:1900006)                    | 91                                    | 73            | 35.70      | +            | 2.04              | 2.24E-04  |
| negative regulation of synaptic transmission (GO:0050805)                   | 64                                    | 51            | 25.11      | +            | 2.03              | 2.96E-02  |
| learning (GO:0007612)                                                       | 159                                   | 126           | 62.37      | +            | 2.02              | 6.53E-09  |
| regulation of synapse structure or activity (GO:0050803)                    | 280                                   | 221           | 109.84     | +            | 2.01              | 3.29E-17  |
| positive regulation of synapse assembly (GO:0051965)                        | 66                                    | 52            | 25.89      | +            | 2.01              | 3.27E-02  |
| synaptic vesicle cycle (GO:0099504)                                         | 94                                    | 74            | 36.88      | +            | 2.01              | 3.75E-04  |
| regulation of postsynaptic membrane potential (GO:0060078)                  | 65                                    | 51            | 25.50      | +            | 2.00              | 4.48E-02  |
| neurotransmitter secretion (GO:0007269)                                     | 102                                   | 80            | 40.01      | +            | 2.00              | 1.29E-04  |
| signal release from synapse (GO:0099643)                                    | 102                                   | 80            | 40.01      | +            | 2.00              | 1.29E-04  |
| regulation of synapse assembly (GO:0051963)                                 | 83                                    | 65            | 32.56      | +            | 2.00              | 2.79E-03  |
| presynaptic process involved in chemical synaptic transmission (GO:0099531) | 106                                   | 83            | 41.58      | +            | 2.00              | 7.57E-05  |
| regulation of dendritic spine development (GO:0060998)                      | 68                                    | 53            | 26.68      | +            | 1.99              | 3.58E-02  |
| vesicle-mediated transport in synapse (GO:0099003)                          | 86                                    | 67            | 33.74      | +            | 1.99              | 2.23E-03  |
| synapse organization (GO:0050808)                                           | 139                                   | 108           | 54.53      | +            | 1.98              | 7.85E-07  |
| central nervous system neuron development (GO:0021954)                      | 85                                    | 66            | 33.34      | +            | 1.98              | 3.04E-03  |
| neurotransmitter transport (GO:0006836)                                     | 147                                   | 114           | 57.67      | +            | 1.98              | 2.71E-07  |
| regulation of calcium ion transmembrane transporter activity (GO:1901019)   | 71                                    | 55            | 27.85      | +            | 1.97              | 2.85E-02  |
| cerebral cortex development (GO:0021987)                                    | 128                                   | 99            | 50.21      | +            | 1.97              | 5.75E-06  |
| regulation of neurotransmitter transport (GO:0051588)                       | 70                                    | 54            | 27.46      | +            | 1.97              | 3.90E-02  |
| regulation of potassium ion transport (GO:0043266)                          | 86                                    | 66            | 33.74      | +            | 1.96              | 4.51E-03  |
| regulation of synapse organization (GO:0050807)                             | 120                                   | 92            | 47.07      | +            | 1.95              | 3.35E-05  |
| protein lipidation (GO:0006497)                                             | 77                                    | 59            | 30.21      | +            | 1.95              | 1.80E-02  |
| calcium ion regulated exocytosis (GO:0017156)                               | 81                                    | 62            | 31.78      | +            | 1.95              | 1.05E-02  |

|                                                                    |     |     |        |   |      |          |
|--------------------------------------------------------------------|-----|-----|--------|---|------|----------|
| learning or memory (GO:0007611)                                    | 272 | 208 | 106.70 | + | 1.95 | 1.31E-14 |
| regulation of dendrite development (GO:0050773)                    | 157 | 120 | 61.59  | + | 1.95 | 2.02E-07 |
| regulation of neurotransmitter levels (GO:0001505)                 | 199 | 152 | 78.07  | + | 1.95 | 5.29E-10 |
| synaptic vesicle localization (GO:0097479)                         | 110 | 84  | 43.15  | + | 1.95 | 1.80E-04 |
| regulation of cation channel activity (GO:2001257)                 | 96  | 73  | 37.66  | + | 1.94 | 1.66E-03 |
| synaptic vesicle transport (GO:0048489)                            | 108 | 82  | 42.37  | + | 1.94 | 3.32E-04 |
| establishment of synaptic vesicle localization (GO:0097480)        | 108 | 82  | 42.37  | + | 1.94 | 3.32E-04 |
| modulation of synaptic transmission (GO:0050804)                   | 340 | 258 | 133.38 | + | 1.93 | 2.81E-18 |
| regulation of calcium ion-dependent exocytosis (GO:0017158)        | 74  | 56  | 29.03  | + | 1.93 | 4.54E-02 |
| lipoprotein biosynthetic process (GO:0042158)                      | 82  | 62  | 32.17  | + | 1.93 | 1.54E-02 |
| negative regulation of neuron projection development (GO:0010977)  | 147 | 111 | 57.67  | + | 1.92 | 2.13E-06 |
| hippocampus development (GO:0021766)                               | 106 | 80  | 41.58  | + | 1.92 | 6.09E-04 |
| regulation of sodium ion transport (GO:0002028)                    | 80  | 60  | 31.38  | + | 1.91 | 2.83E-02 |
| establishment of vesicle localization (GO:0051650)                 | 160 | 120 | 62.77  | + | 1.91 | 6.20E-07 |
| regulation of ion transmembrane transporter activity (GO:0032412)  | 191 | 143 | 74.93  | + | 1.91 | 1.17E-08 |
| neuron projection morphogenesis (GO:0048812)                       | 425 | 318 | 166.72 | + | 1.91 | 3.61E-22 |
| memory (GO:0007613)                                                | 131 | 98  | 51.39  | + | 1.91 | 3.53E-05 |
| negative regulation of neuron differentiation (GO:0045665)         | 222 | 166 | 87.09  | + | 1.91 | 2.19E-10 |
| establishment of cell polarity (GO:0030010)                        | 99  | 74  | 38.84  | + | 1.91 | 2.58E-03 |
| response to osmotic stress (GO:0006970)                            | 87  | 65  | 34.13  | + | 1.90 | 1.30E-02 |
| positive regulation of exocytosis (GO:0045921)                     | 83  | 62  | 32.56  | + | 1.90 | 2.24E-02 |
| regulation of transmembrane transporter activity (GO:0022898)      | 197 | 147 | 77.28  | + | 1.90 | 7.28E-09 |
| developmental growth involved in morphogenesis (GO:0060560)        | 122 | 91  | 47.86  | + | 1.90 | 1.39E-04 |
| regulation of axonogenesis (GO:0050770)                            | 181 | 135 | 71.00  | + | 1.90 | 6.17E-08 |
| vesicle localization (GO:0051648)                                  | 169 | 126 | 66.30  | + | 1.90 | 3.06E-07 |
| cell morphogenesis involved in neuron differentiation (GO:0048667) | 389 | 290 | 152.60 | + | 1.90 | 9.16E-20 |
| Ras protein signal transduction (GO:0007265)                       | 129 | 96  | 50.61  | + | 1.90 | 6.44E-05 |
| negative regulation of neurogenesis (GO:0050768)                   | 285 | 212 | 111.80 | + | 1.90 | 1.09E-13 |
| pallium development (GO:0021543)                                   | 203 | 151 | 79.63  | + | 1.90 | 4.54E-09 |
| neuron projection development (GO:0031175)                         | 592 | 439 | 232.23 | + | 1.89 | 7.68E-31 |
| adult locomotory behavior (GO:0008344)                             | 100 | 74  | 39.23  | + | 1.89 | 3.72E-03 |
| negative regulation of nervous system development (GO:0051961)     | 307 | 227 | 120.43 | + | 1.88 | 1.52E-14 |
| axonogenesis (GO:0007409)                                          | 325 | 240 | 127.49 | + | 1.88 | 1.89E-15 |
| regulation of transporter activity (GO:0032409)                    | 210 | 155 | 82.38  | + | 1.88 | 4.04E-09 |
| associative learning (GO:0008306)                                  | 95  | 70  | 37.27  | + | 1.88 | 8.59E-03 |
| negative regulation of cell development (GO:0010721)               | 340 | 250 | 133.38 | + | 1.87 | 5.66E-16 |
| regulation of neuron projection development (GO:0010975)           | 498 | 366 | 195.36 | + | 1.87 | 1.52E-24 |

|                                                                                    |     |     |        |   |      |          |
|------------------------------------------------------------------------------------|-----|-----|--------|---|------|----------|
| positive regulation of neuron projection development (GO:0010976)                  | 293 | 215 | 114.94 | + | 1.87 | 2.63E-13 |
| chemical synaptic transmission (GO:0007268)                                        | 334 | 245 | 131.02 | + | 1.87 | 1.75E-15 |
| trans-synaptic signaling (GO:0099537)                                              | 334 | 245 | 131.02 | + | 1.87 | 1.75E-15 |
| synaptic signaling (GO:0099536)                                                    | 334 | 245 | 131.02 | + | 1.87 | 1.75E-15 |
| anterograde trans-synaptic signaling (GO:0098916)                                  | 334 | 245 | 131.02 | + | 1.87 | 1.75E-15 |
| positive regulation of synaptic transmission (GO:0050806)                          | 131 | 96  | 51.39  | + | 1.87 | 1.31E-04 |
| cognition (GO:0050890)                                                             | 303 | 222 | 118.86 | + | 1.87 | 9.52E-14 |
| regulation of exocytosis (GO:0017157)                                              | 183 | 134 | 71.79  | + | 1.87 | 2.41E-07 |
| regulation of cell morphogenesis involved in differentiation (GO:0010769)          | 366 | 268 | 143.58 | + | 1.87 | 4.53E-17 |
| negative regulation of cell morphogenesis involved in differentiation (GO:0010771) | 115 | 84  | 45.11  | + | 1.86 | 1.12E-03 |
| negative regulation of canonical Wnt signaling pathway (GO:0090090)                | 100 | 73  | 39.23  | + | 1.86 | 7.13E-03 |
| axon development (GO:0061564)                                                      | 359 | 262 | 140.83 | + | 1.86 | 1.88E-16 |
| action potential (GO:0001508)                                                      | 92  | 67  | 36.09  | + | 1.86 | 2.10E-02 |
| endothelium development (GO:0003158)                                               | 95  | 69  | 37.27  | + | 1.85 | 1.64E-02 |
| regulation of protein complex disassembly (GO:0043244)                             | 87  | 63  | 34.13  | + | 1.85 | 4.83E-02 |
| neuron projection guidance (GO:0097485)                                            | 195 | 141 | 76.50  | + | 1.84 | 1.74E-07 |
| circadian rhythm (GO:0007623)                                                      | 166 | 120 | 65.12  | + | 1.84 | 5.15E-06 |
| telencephalon development (GO:0021537)                                             | 292 | 211 | 114.55 | + | 1.84 | 2.38E-12 |
| Golgi organization (GO:0007030)                                                    | 90  | 65  | 35.31  | + | 1.84 | 3.78E-02 |
| cerebellum development (GO:0021549)                                                | 126 | 91  | 49.43  | + | 1.84 | 5.69E-04 |
| negative regulation of protein serine/threonine kinase activity (GO:0071901)       | 122 | 88  | 47.86  | + | 1.84 | 9.72E-04 |
| axon guidance (GO:0007411)                                                         | 193 | 139 | 75.71  | + | 1.84 | 3.10E-07 |
| metencephalon development (GO:0022037)                                             | 138 | 99  | 54.14  | + | 1.83 | 2.15E-04 |
| single-organism behavior (GO:0044708)                                              | 470 | 337 | 184.38 | + | 1.83 | 1.12E-20 |
| negative regulation of cell projection organization (GO:0031345)                   | 173 | 124 | 67.87  | + | 1.83 | 4.44E-06 |
| negative regulation of neuron apoptotic process (GO:0043524)                       | 160 | 114 | 62.77  | + | 1.82 | 2.92E-05 |
| adult behavior (GO:0030534)                                                        | 170 | 121 | 66.69  | + | 1.81 | 1.05E-05 |
| signal transduction by protein phosphorylation (GO:0023014)                        | 214 | 152 | 83.95  | + | 1.81 | 1.05E-07 |
| ensheathment of neurons (GO:0007272)                                               | 96  | 68  | 37.66  | + | 1.81 | 4.32E-02 |
| axon ensheathment (GO:0008366)                                                     | 96  | 68  | 37.66  | + | 1.81 | 4.32E-02 |
| positive regulation of cell morphogenesis involved in differentiation (GO:0010770) | 185 | 131 | 72.57  | + | 1.81 | 3.09E-06 |
| regulation of circadian rhythm (GO:0042752)                                        | 109 | 77  | 42.76  | + | 1.80 | 1.20E-02 |
| regulation of neuron differentiation (GO:0045664)                                  | 662 | 467 | 259.69 | + | 1.80 | 3.21E-28 |
| locomotory behavior (GO:0007626)                                                   | 224 | 158 | 87.87  | + | 1.80 | 6.92E-08 |
| negative regulation of protein complex assembly (GO:0031333)                       | 105 | 74  | 41.19  | + | 1.80 | 2.05E-02 |
| regulation of extent of cell growth (GO:0061387)                                   | 115 | 81  | 45.11  | + | 1.80 | 7.33E-03 |
| establishment or maintenance of cell polarity (GO:0007163)                         | 152 | 107 | 59.63  | + | 1.79 | 1.55E-04 |

|                                                                                      |     |     |        |   |      |          |
|--------------------------------------------------------------------------------------|-----|-----|--------|---|------|----------|
| regulation of neuron apoptotic process (GO:0043523)                                  | 243 | 171 | 95.33  | + | 1.79 | 1.19E-08 |
| neuron development (GO:0048666)                                                      | 760 | 534 | 298.14 | + | 1.79 | 2.62E-32 |
| gliogenesis (GO:0042063)                                                             | 218 | 153 | 85.52  | + | 1.79 | 2.07E-07 |
| positive regulation of cell projection organization (GO:0031346)                     | 372 | 261 | 145.93 | + | 1.79 | 2.60E-14 |
| positive regulation of neuron differentiation (GO:0045666)                           | 384 | 269 | 150.64 | + | 1.79 | 9.60E-15 |
| negative regulation of ion transport (GO:0043271)                                    | 130 | 91  | 51.00  | + | 1.78 | 2.13E-03 |
| MAPK cascade (GO:0000165)                                                            | 163 | 114 | 63.94  | + | 1.78 | 7.69E-05 |
| cellular response to insulin stimulus (GO:0032869)                                   | 159 | 111 | 62.37  | + | 1.78 | 1.30E-04 |
| neural tube formation (GO:0001841)                                                   | 122 | 85  | 47.86  | + | 1.78 | 6.15E-03 |
| regulation of receptor activity (GO:0010469)                                         | 122 | 85  | 47.86  | + | 1.78 | 6.15E-03 |
| carboxylic acid transport (GO:0046942)                                               | 211 | 147 | 82.77  | + | 1.78 | 8.15E-07 |
| potassium ion transmembrane transport (GO:0071805)                                   | 135 | 94  | 52.96  | + | 1.77 | 1.72E-03 |
| cellular potassium ion transport (GO:0071804)                                        | 135 | 94  | 52.96  | + | 1.77 | 1.72E-03 |
| regulation of membrane potential (GO:0042391)                                        | 375 | 261 | 147.11 | + | 1.77 | 6.68E-14 |
| glial cell differentiation (GO:0010001)                                              | 171 | 119 | 67.08  | + | 1.77 | 4.85E-05 |
| exocytosis (GO:0006887)                                                              | 207 | 144 | 81.20  | + | 1.77 | 1.38E-06 |
| regulation of proteasomal ubiquitin-dependent protein catabolic process (GO:0032434) | 105 | 73  | 41.19  | + | 1.77 | 3.76E-02 |
| potassium ion transport (GO:0006813)                                                 | 150 | 104 | 58.84  | + | 1.77 | 4.96E-04 |
| protein localization to plasma membrane (GO:0072659)                                 | 150 | 104 | 58.84  | + | 1.77 | 4.96E-04 |
| positive regulation of nervous system development (GO:0051962)                       | 540 | 374 | 211.84 | + | 1.77 | 1.13E-20 |
| regulation of cell morphogenesis (GO:0022604)                                        | 582 | 403 | 228.31 | + | 1.77 | 1.79E-22 |
| negative regulation of cytoskeleton organization (GO:0051494)                        | 117 | 81  | 45.90  | + | 1.76 | 1.38E-02 |
| regulation of neuron death (GO:1901214)                                              | 318 | 220 | 124.75 | + | 1.76 | 4.43E-11 |
| limbic system development (GO:0021761)                                               | 136 | 94  | 53.35  | + | 1.76 | 2.35E-03 |
| regulation of smooth muscle cell proliferation (GO:0048660)                          | 136 | 94  | 53.35  | + | 1.76 | 2.35E-03 |
| regulation of cell projection organization (GO:0031344)                              | 657 | 454 | 257.73 | + | 1.76 | 1.67E-25 |
| regulated exocytosis (GO:0045055)                                                    | 126 | 87  | 49.43  | + | 1.76 | 6.55E-03 |
| regulation of ion transmembrane transport (GO:0034765)                               | 396 | 273 | 155.35 | + | 1.76 | 3.76E-14 |
| behavior (GO:0007610)                                                                | 633 | 436 | 248.32 | + | 1.76 | 4.21E-24 |
| primary neural tube formation (GO:0014020)                                           | 109 | 75  | 42.76  | + | 1.75 | 4.00E-02 |
| cell morphogenesis involved in differentiation (GO:0000904)                          | 554 | 381 | 217.33 | + | 1.75 | 1.36E-20 |
| regulation of cell size (GO:0008361)                                                 | 192 | 132 | 75.32  | + | 1.75 | 1.54E-05 |
| epithelial tube formation (GO:0072175)                                               | 144 | 99  | 56.49  | + | 1.75 | 1.47E-03 |
| protein dephosphorylation (GO:0006470)                                               | 176 | 121 | 69.04  | + | 1.75 | 7.02E-05 |
| peptidyl-serine phosphorylation (GO:0018105)                                         | 144 | 99  | 56.49  | + | 1.75 | 1.47E-03 |
| regulation of cation transmembrane transport (GO:1904062)                            | 227 | 156 | 89.05  | + | 1.75 | 5.77E-07 |
| regulation of neurogenesis (GO:0050767)                                              | 802 | 551 | 314.61 | + | 1.75 | 5.14E-31 |

|                                                                      |      |     |        |   |      |          |
|----------------------------------------------------------------------|------|-----|--------|---|------|----------|
| positive regulation of neurogenesis (GO:0050769)                     | 476  | 327 | 186.73 | + | 1.75 | 3.14E-17 |
| regulation of nervous system development (GO:0051960)                | 897  | 616 | 351.88 | + | 1.75 | 4.81E-35 |
| regulation of protein polymerization (GO:0032271)                    | 172  | 118 | 67.47  | + | 1.75 | 1.19E-04 |
| embryonic epithelial tube formation (GO:0001838)                     | 143  | 98  | 56.10  | + | 1.75 | 1.94E-03 |
| forebrain development (GO:0030900)                                   | 443  | 303 | 173.78 | + | 1.74 | 1.60E-15 |
| regulation of transmembrane transport (GO:0034762)                   | 411  | 281 | 161.23 | + | 1.74 | 3.42E-14 |
| regulation of actin filament length (GO:0030832)                     | 158  | 108 | 61.98  | + | 1.74 | 5.57E-04 |
| regulation of actin polymerization or depolymerization (GO:0008064)  | 158  | 108 | 61.98  | + | 1.74 | 5.57E-04 |
| neural tube development (GO:0021915)                                 | 180  | 123 | 70.61  | + | 1.74 | 7.40E-05 |
| cellular response to hypoxia (GO:0071456)                            | 142  | 97  | 55.70  | + | 1.74 | 2.55E-03 |
| regulation of cellular component size (GO:0032535)                   | 359  | 245 | 140.83 | + | 1.74 | 5.65E-12 |
| regulation of small GTPase mediated signal transduction (GO:0051056) | 223  | 152 | 87.48  | + | 1.74 | 1.73E-06 |
| negative regulation of protein kinase activity (GO:0006469)          | 229  | 156 | 89.83  | + | 1.74 | 1.05E-06 |
| rhythmic process (GO:0048511)                                        | 341  | 232 | 133.77 | + | 1.73 | 4.49E-11 |
| regulation of regulated secretory pathway (GO:1903305)               | 122  | 83  | 47.86  | + | 1.73 | 1.99E-02 |
| cellular response to decreased oxygen levels (GO:0036294)            | 150  | 102 | 58.84  | + | 1.73 | 1.59E-03 |
| regulation of Ras protein signal transduction (GO:0046578)           | 200  | 136 | 78.46  | + | 1.73 | 1.71E-05 |
| hindbrain development (GO:0030902)                                   | 178  | 121 | 69.83  | + | 1.73 | 1.28E-04 |
| brain development (GO:0007420)                                       | 821  | 558 | 322.07 | + | 1.73 | 2.71E-30 |
| negative regulation of neuron death (GO:1901215)                     | 209  | 142 | 81.99  | + | 1.73 | 8.08E-06 |
| regulation of heart contraction (GO:0008016)                         | 165  | 112 | 64.73  | + | 1.73 | 4.56E-04 |
| head development (GO:0060322)                                        | 861  | 584 | 337.76 | + | 1.73 | 1.22E-31 |
| dephosphorylation (GO:0016311)                                       | 270  | 183 | 105.92 | + | 1.73 | 4.23E-08 |
| regulation of MAP kinase activity (GO:0043405)                       | 301  | 204 | 118.08 | + | 1.73 | 2.67E-09 |
| organic anion transport (GO:0015711)                                 | 242  | 164 | 94.93  | + | 1.73 | 5.23E-07 |
| negative regulation of MAPK cascade (GO:0043409)                     | 155  | 105 | 60.80  | + | 1.73 | 1.27E-03 |
| cell growth (GO:0016049)                                             | 145  | 98  | 56.88  | + | 1.72 | 3.52E-03 |
| central nervous system development (GO:0007417)                      | 1018 | 688 | 399.35 | + | 1.72 | 1.77E-37 |
| small GTPase mediated signal transduction (GO:0007264)               | 336  | 227 | 131.81 | + | 1.72 | 1.75E-10 |
| regulation of cell development (GO:0060284)                          | 971  | 656 | 380.91 | + | 1.72 | 1.67E-35 |
| peptidyl-serine modification (GO:0018209)                            | 160  | 108 | 62.77  | + | 1.72 | 1.01E-03 |
| negative regulation of kinase activity (GO:0033673)                  | 246  | 166 | 96.50  | + | 1.72 | 5.46E-07 |
| plasma membrane organization (GO:0007009)                            | 209  | 141 | 81.99  | + | 1.72 | 1.42E-05 |
| gland morphogenesis (GO:0022612)                                     | 129  | 87  | 50.61  | + | 1.72 | 1.62E-02 |
| protein localization to cell periphery (GO:1990778)                  | 162  | 109 | 63.55  | + | 1.72 | 1.03E-03 |
| positive regulation of cell growth (GO:0030307)                      | 162  | 109 | 63.55  | + | 1.72 | 1.03E-03 |
| neuron differentiation (GO:0030182)                                  | 968  | 651 | 379.73 | + | 1.71 | 1.23E-34 |

|                                                                                       |      |     |        |   |      |          |
|---------------------------------------------------------------------------------------|------|-----|--------|---|------|----------|
| negative regulation of Wnt signaling pathway (GO:0030178)                             | 137  | 92  | 53.74  | + | 1.71 | 9.99E-03 |
| positive regulation of cell development (GO:0010720)                                  | 575  | 386 | 225.57 | + | 1.71 | 3.94E-19 |
| signal release (GO:0023061)                                                           | 176  | 118 | 69.04  | + | 1.71 | 3.86E-04 |
| nephron development (GO:0072006)                                                      | 130  | 87  | 51.00  | + | 1.71 | 2.16E-02 |
| response to insulin (GO:0032868)                                                      | 246  | 164 | 96.50  | + | 1.70 | 1.66E-06 |
| cellular response to oxygen levels (GO:0071453)                                       | 162  | 108 | 63.55  | + | 1.70 | 1.80E-03 |
| positive regulation of cellular catabolic process (GO:0031331)                        | 195  | 130 | 76.50  | + | 1.70 | 1.15E-04 |
| phospholipid biosynthetic process (GO:0008654)                                        | 123  | 82  | 48.25  | + | 1.70 | 4.68E-02 |
| regulation of metal ion transport (GO:0010959)                                        | 360  | 240 | 141.22 | + | 1.70 | 1.25E-10 |
| second-messenger-mediated signaling (GO:0019932)                                      | 147  | 98  | 57.67  | + | 1.70 | 6.28E-03 |
| tube formation (GO:0035148)                                                           | 159  | 106 | 62.37  | + | 1.70 | 2.31E-03 |
| transmembrane receptor protein tyrosine kinase signaling pathway (GO:0007169)         | 339  | 226 | 132.99 | + | 1.70 | 7.19E-10 |
| vesicle organization (GO:0016050)                                                     | 206  | 137 | 80.81  | + | 1.70 | 5.53E-05 |
| endosomal transport (GO:0016197)                                                      | 191  | 127 | 74.93  | + | 1.69 | 1.93E-04 |
| morphogenesis of embryonic epithelium (GO:0016331)                                    | 167  | 111 | 65.51  | + | 1.69 | 1.42E-03 |
| regulation of actin filament polymerization (GO:0030833)                              | 137  | 91  | 53.74  | + | 1.69 | 1.74E-02 |
| secretion by cell (GO:0032940)                                                        | 383  | 254 | 150.25 | + | 1.69 | 3.78E-11 |
| regulation of vesicle-mediated transport (GO:0060627)                                 | 454  | 301 | 178.10 | + | 1.69 | 1.18E-13 |
| regulation of protein serine/threonine kinase activity (GO:0071900)                   | 433  | 287 | 169.86 | + | 1.69 | 6.89E-13 |
| regulation of ion transport (GO:0043269)                                              | 596  | 395 | 233.80 | + | 1.69 | 1.05E-18 |
| regulation of proteolysis involved in cellular protein catabolic process (GO:1903050) | 163  | 108 | 63.94  | + | 1.69 | 2.38E-03 |
| regulation of catabolic process (GO:0009894)                                          | 455  | 301 | 178.49 | + | 1.69 | 1.56E-13 |
| protein localization to membrane (GO:0072657)                                         | 297  | 196 | 116.51 | + | 1.68 | 7.06E-08 |
| generation of neurons (GO:0048699)                                                    | 1493 | 985 | 585.69 | + | 1.68 | 2.61E-51 |
| kidney epithelium development (GO:0072073)                                            | 141  | 93  | 55.31  | + | 1.68 | 1.79E-02 |
| regulation of cellular catabolic process (GO:0031329)                                 | 311  | 205 | 122.00 | + | 1.68 | 2.63E-08 |
| establishment of protein localization to membrane (GO:0090150)                        | 173  | 114 | 67.87  | + | 1.68 | 1.48E-03 |
| response to hypoxia (GO:0001666)                                                      | 375  | 247 | 147.11 | + | 1.68 | 1.82E-10 |
| phospholipid metabolic process (GO:0006644)                                           | 249  | 164 | 97.68  | + | 1.68 | 3.82E-06 |
| cell surface receptor signaling pathway involved in cell-cell signaling (GO:1905114)  | 249  | 164 | 97.68  | + | 1.68 | 3.82E-06 |
| cell projection organization (GO:0030030)                                             | 952  | 627 | 373.46 | + | 1.68 | 8.92E-31 |
| cell projection morphogenesis (GO:0048858)                                            | 636  | 418 | 249.50 | + | 1.68 | 2.57E-19 |
| regulation of proteasomal protein catabolic process (GO:0061136)                      | 140  | 92  | 54.92  | + | 1.68 | 2.34E-02 |
| regulation of insulin secretion (GO:0050796)                                          | 172  | 113 | 67.47  | + | 1.67 | 1.93E-03 |
| endomembrane system organization (GO:0010256)                                         | 419  | 275 | 164.37 | + | 1.67 | 9.37E-12 |
| regulation of protein catabolic process (GO:0042176)                                  | 311  | 204 | 122.00 | + | 1.67 | 4.49E-08 |
| regulation of cellular protein catabolic process (GO:1903362)                         | 183  | 120 | 71.79  | + | 1.67 | 9.23E-04 |

|                                                                              |      |      |        |   |      |          |
|------------------------------------------------------------------------------|------|------|--------|---|------|----------|
| Golgi vesicle transport (GO:0048193)                                         | 180  | 118  | 70.61  | + | 1.67 | 1.19E-03 |
| nervous system development (GO:0007399)                                      | 2238 | 1467 | 877.94 | + | 1.67 | 8.42E-79 |
| positive regulation of catabolic process (GO:0009896)                        | 255  | 167  | 100.03 | + | 1.67 | 3.96E-06 |
| neurogenesis (GO:0022008)                                                    | 1608 | 1053 | 630.80 | + | 1.67 | 7.90E-54 |
| glycerophospholipid metabolic process (GO:0006650)                           | 168  | 110  | 65.90  | + | 1.67 | 3.22E-03 |
| branching morphogenesis of an epithelial tube (GO:0048754)                   | 165  | 108  | 64.73  | + | 1.67 | 4.14E-03 |
| negative regulation of cell migration (GO:0030336)                           | 217  | 142  | 85.13  | + | 1.67 | 7.79E-05 |
| negative regulation of protein phosphorylation (GO:0001933)                  | 399  | 261  | 156.52 | + | 1.67 | 7.11E-11 |
| positive regulation of protein serine/threonine kinase activity (GO:0071902) | 263  | 172  | 103.17 | + | 1.67 | 2.43E-06 |
| response to light stimulus (GO:0009416)                                      | 300  | 196  | 117.69 | + | 1.67 | 1.60E-07 |
| negative regulation of transferase activity (GO:0051348)                     | 274  | 179  | 107.49 | + | 1.67 | 1.16E-06 |
| negative regulation of cell growth (GO:0030308)                              | 173  | 113  | 67.87  | + | 1.67 | 2.54E-03 |
| glycoprotein biosynthetic process (GO:0009101)                               | 245  | 160  | 96.11  | + | 1.66 | 1.08E-05 |
| response to decreased oxygen levels (GO:0036293)                             | 386  | 252  | 151.42 | + | 1.66 | 2.51E-10 |
| regulation of developmental growth (GO:0048638)                              | 337  | 220  | 132.20 | + | 1.66 | 1.05E-08 |
| anion transport (GO:0006820)                                                 | 360  | 235  | 141.22 | + | 1.66 | 1.84E-09 |
| muscle cell development (GO:0055001)                                         | 141  | 92   | 55.31  | + | 1.66 | 3.07E-02 |
| cell part morphogenesis (GO:0032990)                                         | 660  | 430  | 258.91 | + | 1.66 | 2.83E-19 |
| intracellular signal transduction (GO:0035556)                               | 1302 | 848  | 510.76 | + | 1.66 | 2.27E-41 |
| central nervous system neuron differentiation (GO:0021953)                   | 192  | 125  | 75.32  | + | 1.66 | 7.42E-04 |
| regulation of cell growth (GO:0001558)                                       | 395  | 257  | 154.95 | + | 1.66 | 2.01E-10 |
| morphogenesis of a branching epithelium (GO:0061138)                         | 197  | 128  | 77.28  | + | 1.66 | 5.84E-04 |
| secretion (GO:0046903)                                                       | 511  | 332  | 200.46 | + | 1.66 | 4.14E-14 |
| epithelial tube morphogenesis (GO:0060562)                                   | 348  | 226  | 136.52 | + | 1.66 | 8.44E-09 |
| vacuolar transport (GO:0007034)                                              | 228  | 148  | 89.44  | + | 1.65 | 6.31E-05 |
| regulation of nucleotide metabolic process (GO:0006140)                      | 208  | 135  | 81.60  | + | 1.65 | 2.79E-04 |
| glycoprotein metabolic process (GO:0009100)                                  | 282  | 183  | 110.63 | + | 1.65 | 1.20E-06 |
| developmental growth (GO:0048589)                                            | 410  | 266  | 160.84 | + | 1.65 | 9.69E-11 |
| positive regulation of protein catabolic process (GO:0045732)                | 182  | 118  | 71.40  | + | 1.65 | 2.03E-03 |
| regulation of endocytosis (GO:0030100)                                       | 213  | 138  | 83.56  | + | 1.65 | 2.19E-04 |
| negative regulation of cellular component organization (GO:0051129)          | 633  | 410  | 248.32 | + | 1.65 | 8.06E-18 |
| cellular response to peptide (GO:1901653)                                    | 286  | 185  | 112.19 | + | 1.65 | 1.22E-06 |
| negative regulation of phosphorylation (GO:0042326)                          | 436  | 282  | 171.04 | + | 1.65 | 2.21E-11 |
| regulation of purine nucleotide metabolic process (GO:1900542)               | 201  | 130  | 78.85  | + | 1.65 | 5.93E-04 |
| negative regulation of locomotion (GO:0040013)                               | 263  | 170  | 103.17 | + | 1.65 | 6.93E-06 |
| connective tissue development (GO:0061448)                                   | 212  | 137  | 83.17  | + | 1.65 | 2.83E-04 |
| actin filament-based process (GO:0030029)                                    | 424  | 274  | 166.33 | + | 1.65 | 6.03E-11 |

|                                                                       |      |     |        |   |      |          |
|-----------------------------------------------------------------------|------|-----|--------|---|------|----------|
| cell division (GO:0051301)                                            | 277  | 179 | 108.66 | + | 1.65 | 2.58E-06 |
| regulation of protein kinase activity (GO:0045859)                    | 659  | 425 | 258.52 | + | 1.64 | 3.01E-18 |
| cell-cell signaling (GO:0007267)                                      | 704  | 454 | 276.17 | + | 1.64 | 1.11E-19 |
| regulation of kinase activity (GO:0043549)                            | 718  | 463 | 281.66 | + | 1.64 | 4.00E-20 |
| negative regulation of cellular component movement (GO:0051271)       | 259  | 167 | 101.60 | + | 1.64 | 1.15E-05 |
| striated muscle cell differentiation (GO:0051146)                     | 197  | 127 | 77.28  | + | 1.64 | 9.83E-04 |
| negative regulation of intracellular signal transduction (GO:1902532) | 466  | 300 | 182.81 | + | 1.64 | 5.09E-12 |
| angiogenesis (GO:0001525)                                             | 258  | 166 | 101.21 | + | 1.64 | 1.48E-05 |
| negative regulation of protein modification process (GO:0031400)      | 527  | 339 | 206.74 | + | 1.64 | 7.28E-14 |
| actin filament organization (GO:0007015)                              | 185  | 119 | 72.57  | + | 1.64 | 2.66E-03 |
| morphogenesis of a branching structure (GO:0001763)                   | 207  | 133 | 81.20  | + | 1.64 | 6.05E-04 |
| positive regulation of developmental growth (GO:0048639)              | 179  | 115 | 70.22  | + | 1.64 | 4.38E-03 |
| positive regulation of MAP kinase activity (GO:0043406)               | 179  | 115 | 70.22  | + | 1.64 | 4.38E-03 |
| protein polyubiquitination (GO:0000209)                               | 162  | 104 | 63.55  | + | 1.64 | 1.52E-02 |
| regulation of anatomical structure size (GO:0090066)                  | 519  | 333 | 203.60 | + | 1.64 | 2.00E-13 |
| organelle localization (GO:0051640)                                   | 385  | 247 | 151.03 | + | 1.64 | 2.59E-09 |
| regulation of protein binding (GO:0043393)                            | 184  | 118 | 72.18  | + | 1.63 | 3.43E-03 |
| tube morphogenesis (GO:0035239)                                       | 393  | 252 | 154.17 | + | 1.63 | 1.58E-09 |
| response to oxygen levels (GO:0070482)                                | 418  | 268 | 163.98 | + | 1.63 | 2.78E-10 |
| cellular response to peptide hormone stimulus (GO:0071375)            | 259  | 166 | 101.60 | + | 1.63 | 1.91E-05 |
| positive regulation of kinase activity (GO:0033674)                   | 437  | 280 | 171.43 | + | 1.63 | 8.03E-11 |
| positive regulation of protein kinase activity (GO:0045860)           | 403  | 258 | 158.09 | + | 1.63 | 9.67E-10 |
| establishment of organelle localization (GO:0051656)                  | 314  | 201 | 123.18 | + | 1.63 | 4.72E-07 |
| actin cytoskeleton organization (GO:0030036)                          | 383  | 245 | 150.25 | + | 1.63 | 4.29E-09 |
| eye morphogenesis (GO:0048592)                                        | 158  | 101 | 61.98  | + | 1.63 | 2.51E-02 |
| positive regulation of growth (GO:0045927)                            | 263  | 168 | 103.17 | + | 1.63 | 1.93E-05 |
| morphogenesis of an epithelium (GO:0002009)                           | 489  | 312 | 191.83 | + | 1.63 | 4.09E-12 |
| negative regulation of cell differentiation (GO:0045596)              | 665  | 424 | 260.87 | + | 1.63 | 2.37E-17 |
| protein transport (GO:0015031)                                        | 946  | 603 | 371.10 | + | 1.62 | 6.36E-26 |
| cellular response to growth factor stimulus (GO:0071363)              | 463  | 295 | 181.63 | + | 1.62 | 3.01E-11 |
| activation of protein kinase activity (GO:0032147)                    | 234  | 149 | 91.80  | + | 1.62 | 1.79E-04 |
| regulation of actin filament-based process (GO:0032970)               | 322  | 205 | 126.32 | + | 1.62 | 4.78E-07 |
| muscle cell differentiation (GO:0042692)                              | 269  | 171 | 105.53 | + | 1.62 | 1.95E-05 |
| response to growth factor (GO:0070848)                                | 498  | 316 | 195.36 | + | 1.62 | 5.29E-12 |
| epithelial cell development (GO:0002064)                              | 227  | 144 | 89.05  | + | 1.62 | 3.77E-04 |
| establishment of protein localization (GO:0045184)                    | 1072 | 679 | 420.53 | + | 1.61 | 6.89E-29 |
| single-organism membrane organization (GO:0044802)                    | 605  | 383 | 237.33 | + | 1.61 | 6.10E-15 |



|                                                                                         |      |      |        |   |      |          |
|-----------------------------------------------------------------------------------------|------|------|--------|---|------|----------|
| urogenital system development (GO:0001655)                                              | 354  | 224  | 138.87 | + | 1.61 | 1.09E-07 |
| blood vessel development (GO:0001568)                                                   | 452  | 286  | 177.31 | + | 1.61 | 1.73E-10 |
| cellular response to organonitrogen compound (GO:0071417)                               | 498  | 315  | 195.36 | + | 1.61 | 8.71E-12 |
| negative regulation of phosphorus metabolic process (GO:0010563)                        | 552  | 349  | 216.54 | + | 1.61 | 2.63E-13 |
| negative regulation of phosphate metabolic process (GO:0045936)                         | 552  | 349  | 216.54 | + | 1.61 | 2.63E-13 |
| positive regulation of transferase activity (GO:0051347)                                | 503  | 318  | 197.32 | + | 1.61 | 6.79E-12 |
| regulation of binding (GO:0051098)                                                      | 315  | 199  | 123.57 | + | 1.61 | 1.66E-06 |
| regulation of transferase activity (GO:0051338)                                         | 809  | 511  | 317.36 | + | 1.61 | 1.13E-20 |
| regulation of autophagy (GO:0010506)                                                    | 198  | 125  | 77.67  | + | 1.61 | 3.50E-03 |
| vasculature development (GO:0001944)                                                    | 480  | 303  | 188.30 | + | 1.61 | 3.88E-11 |
| regulation of blood circulation (GO:1903522)                                            | 252  | 159  | 98.86  | + | 1.61 | 1.10E-04 |
| aging (GO:0007568)                                                                      | 398  | 251  | 156.13 | + | 1.61 | 9.18E-09 |
| negative regulation of cell motility (GO:2000146)                                       | 230  | 145  | 90.23  | + | 1.61 | 4.84E-04 |
| ameboidal-type cell migration (GO:0001667)                                              | 165  | 104  | 64.73  | + | 1.61 | 3.25E-02 |
| regulation of actin cytoskeleton organization (GO:0032956)                              | 284  | 179  | 111.41 | + | 1.61 | 1.53E-05 |
| regulation of canonical Wnt signaling pathway (GO:0060828)                              | 173  | 109  | 67.87  | + | 1.61 | 1.98E-02 |
| response to peptide hormone (GO:0043434)                                                | 454  | 286  | 178.10 | + | 1.61 | 2.84E-10 |
| glycosylation (GO:0070085)                                                              | 213  | 134  | 83.56  | + | 1.60 | 1.67E-03 |
| regulation of muscle system process (GO:0090257)                                        | 202  | 127  | 79.24  | + | 1.60 | 3.50E-03 |
| response to carbohydrate (GO:0009743)                                                   | 237  | 149  | 92.97  | + | 1.60 | 3.78E-04 |
| growth (GO:0040007)                                                                     | 484  | 304  | 189.87 | + | 1.60 | 6.33E-11 |
| cell morphogenesis (GO:0000902)                                                         | 880  | 552  | 345.21 | + | 1.60 | 6.33E-22 |
| renal system development (GO:0072001)                                                   | 311  | 195  | 122.00 | + | 1.60 | 4.43E-06 |
| response to peptide (GO:1901652)                                                        | 504  | 316  | 197.71 | + | 1.60 | 2.32E-11 |
| regulation of cytoskeleton organization (GO:0051493)                                    | 418  | 262  | 163.98 | + | 1.60 | 5.54E-09 |
| negative regulation of transport (GO:0051051)                                           | 490  | 307  | 192.22 | + | 1.60 | 6.29E-11 |
| metal ion transport (GO:0030001)                                                        | 543  | 340  | 213.01 | + | 1.60 | 2.44E-12 |
| developmental maturation (GO:0021700)                                                   | 211  | 132  | 82.77  | + | 1.59 | 2.72E-03 |
| regulation of protein modification by small protein conjugation or removal (GO:1903320) | 211  | 132  | 82.77  | + | 1.59 | 2.72E-03 |
| protein homooligomerization (GO:0051260)                                                | 283  | 177  | 111.02 | + | 1.59 | 3.18E-05 |
| enzyme linked receptor protein signaling pathway (GO:0007167)                           | 520  | 325  | 203.99 | + | 1.59 | 1.39E-11 |
| regulation of epithelial cell migration (GO:0010632)                                    | 168  | 105  | 65.90  | + | 1.59 | 4.16E-02 |
| protein phosphorylation (GO:0006468)                                                    | 781  | 488  | 306.38 | + | 1.59 | 1.03E-18 |
| regulation of transport (GO:0051049)                                                    | 1813 | 1132 | 711.22 | + | 1.59 | 1.35E-48 |
| tissue morphogenesis (GO:0048729)                                                       | 596  | 372  | 233.80 | + | 1.59 | 1.52E-13 |
| cellular response to hormone stimulus (GO:0032870)                                      | 561  | 350  | 220.07 | + | 1.59 | 1.45E-12 |
| cell-cell signaling by wnt (GO:0198738)                                                 | 202  | 126  | 79.24  | + | 1.59 | 5.70E-03 |

|                                                                           |      |      |        |   |      |          |
|---------------------------------------------------------------------------|------|------|--------|---|------|----------|
| Wnt signaling pathway (GO:0016055)                                        | 202  | 126  | 79.24  | + | 1.59 | 5.70E-03 |
| regulation of protein ubiquitination (GO:0031396)                         | 186  | 116  | 72.97  | + | 1.59 | 1.54E-02 |
| single-organism carbohydrate metabolic process (GO:0044723)               | 470  | 293  | 184.38 | + | 1.59 | 4.52E-10 |
| regulation of cellular localization (GO:0060341)                          | 839  | 523  | 329.13 | + | 1.59 | 4.66E-20 |
| regulation of ossification (GO:0030278)                                   | 199  | 124  | 78.07  | + | 1.59 | 7.29E-03 |
| positive regulation of ion transport (GO:0043270)                         | 249  | 155  | 97.68  | + | 1.59 | 3.74E-04 |
| negative regulation of protein transport (GO:0051224)                     | 209  | 130  | 81.99  | + | 1.59 | 4.43E-03 |
| nitrogen compound transport (GO:0071705)                                  | 402  | 250  | 157.70 | + | 1.59 | 3.93E-08 |
| response to glucose (GO:0009749)                                          | 185  | 115  | 72.57  | + | 1.58 | 1.96E-02 |
| negative regulation of establishment of protein localization (GO:1904950) | 222  | 138  | 87.09  | + | 1.58 | 2.11E-03 |
| cellular response to steroid hormone stimulus (GO:0071383)                | 206  | 128  | 80.81  | + | 1.58 | 5.67E-03 |
| protein glycosylation (GO:0006486)                                        | 203  | 126  | 79.63  | + | 1.58 | 7.25E-03 |
| macromolecule glycosylation (GO:0043413)                                  | 203  | 126  | 79.63  | + | 1.58 | 7.25E-03 |
| glycerolipid metabolic process (GO:0046486)                               | 245  | 152  | 96.11  | + | 1.58 | 6.08E-04 |
| regulation of cellular component biogenesis (GO:0044087)                  | 774  | 480  | 303.63 | + | 1.58 | 9.42E-18 |
| single-organism cellular localization (GO:1902580)                        | 695  | 431  | 272.64 | + | 1.58 | 1.19E-15 |
| kidney development (GO:0001822)                                           | 292  | 181  | 114.55 | + | 1.58 | 3.99E-05 |
| regulation of calcium ion transport (GO:0051924)                          | 234  | 145  | 91.80  | + | 1.58 | 1.27E-03 |
| tube development (GO:0035295)                                             | 681  | 421  | 267.15 | + | 1.58 | 5.22E-15 |
| cellular response to extracellular stimulus (GO:0031668)                  | 212  | 131  | 83.17  | + | 1.58 | 5.59E-03 |
| negative regulation of developmental process (GO:0051093)                 | 884  | 546  | 346.78 | + | 1.57 | 3.11E-20 |
| response to hormone (GO:0009725)                                          | 965  | 596  | 378.56 | + | 1.57 | 2.26E-22 |
| protein localization (GO:0008104)                                         | 1523 | 940  | 597.45 | + | 1.57 | 1.79E-37 |
| cellular component morphogenesis (GO:0032989)                             | 966  | 596  | 378.95 | + | 1.57 | 2.87E-22 |
| protein autophosphorylation (GO:0046777)                                  | 198  | 122  | 77.67  | + | 1.57 | 1.50E-02 |
| response to alkaloid (GO:0043279)                                         | 211  | 130  | 82.77  | + | 1.57 | 7.11E-03 |
| regulation of anatomical structure morphogenesis (GO:0022603)             | 1017 | 626  | 398.96 | + | 1.57 | 2.58E-23 |
| cellular response to nutrient levels (GO:0031669)                         | 182  | 112  | 71.40  | + | 1.57 | 4.04E-02 |
| regulation of growth (GO:0040008)                                         | 639  | 393  | 250.67 | + | 1.57 | 1.69E-13 |
| cellular response to nitrogen compound (GO:1901699)                       | 574  | 353  | 225.17 | + | 1.57 | 7.41E-12 |
| cellular response to external stimulus (GO:0071496)                       | 309  | 190  | 121.22 | + | 1.57 | 3.01E-05 |
| response to steroid hormone (GO:0048545)                                  | 457  | 281  | 179.28 | + | 1.57 | 6.41E-09 |
| response to ketone (GO:1901654)                                           | 296  | 182  | 116.12 | + | 1.57 | 6.33E-05 |
| regulation of cellular component organization (GO:0051128)                | 2292 | 1409 | 899.12 | + | 1.57 | 1.22E-58 |
| ossification (GO:0001503)                                                 | 262  | 161  | 102.78 | + | 1.57 | 4.59E-04 |
| response to organonitrogen compound (GO:0010243)                          | 993  | 610  | 389.54 | + | 1.57 | 1.98E-22 |
| muscle structure development (GO:0061061)                                 | 458  | 281  | 179.67 | + | 1.56 | 8.06E-09 |

|                                                                        |      |      |        |   |      |          |
|------------------------------------------------------------------------|------|------|--------|---|------|----------|
| regulation of GTPase activity (GO:0043087)                             | 495  | 303  | 194.18 | + | 1.56 | 1.37E-09 |
| response to mechanical stimulus (GO:0009612)                           | 278  | 170  | 109.06 | + | 1.56 | 2.72E-04 |
| blood vessel morphogenesis (GO:0048514)                                | 350  | 214  | 137.30 | + | 1.56 | 5.10E-06 |
| mesenchyme development (GO:0060485)                                    | 193  | 118  | 75.71  | + | 1.56 | 3.08E-02 |
| heart development (GO:0007507)                                         | 553  | 338  | 216.94 | + | 1.56 | 6.60E-11 |
| positive regulation of cellular component organization (GO:0051130)    | 1203 | 735  | 471.92 | + | 1.56 | 4.29E-27 |
| negative regulation of cell communication (GO:0010648)                 | 1159 | 708  | 454.66 | + | 1.56 | 6.10E-26 |
| response to drug (GO:0042493)                                          | 614  | 375  | 240.86 | + | 1.56 | 2.46E-12 |
| phosphorus metabolic process (GO:0006793)                              | 1725 | 1053 | 676.70 | + | 1.56 | 1.12E-40 |
| negative regulation of organelle organization (GO:0010639)             | 300  | 183  | 117.69 | + | 1.55 | 9.92E-05 |
| phosphate-containing compound metabolic process (GO:0006796)           | 1723 | 1051 | 675.91 | + | 1.55 | 1.85E-40 |
| negative regulation of growth (GO:0045926)                             | 246  | 150  | 96.50  | + | 1.55 | 1.96E-03 |
| organic substance transport (GO:0071702)                               | 1547 | 943  | 606.87 | + | 1.55 | 1.23E-35 |
| negative regulation of signaling (GO:0023057)                          | 1162 | 708  | 455.84 | + | 1.55 | 1.22E-25 |
| regulation of localization (GO:0032879)                                | 2487 | 1515 | 975.62 | + | 1.55 | 2.07E-61 |
| ion transport (GO:0006811)                                             | 1064 | 648  | 417.39 | + | 1.55 | 4.04E-23 |
| cellular response to endogenous stimulus (GO:0071495)                  | 1038 | 632  | 407.19 | + | 1.55 | 1.94E-22 |
| response to abiotic stimulus (GO:0009628)                              | 1245 | 758  | 488.40 | + | 1.55 | 1.26E-27 |
| regulation of cellular response to growth factor stimulus (GO:0090287) | 230  | 140  | 90.23  | + | 1.55 | 5.26E-03 |
| autophagy (GO:0006914)                                                 | 301  | 183  | 118.08 | + | 1.55 | 1.24E-04 |
| circulatory system development (GO:0072359)                            | 854  | 519  | 335.01 | + | 1.55 | 1.04E-17 |
| cardiovascular system development (GO:0072358)                         | 854  | 519  | 335.01 | + | 1.55 | 1.04E-17 |
| establishment of localization in cell (GO:0051649)                     | 1170 | 711  | 458.98 | + | 1.55 | 1.85E-25 |
| regulation of cell differentiation (GO:0045595)                        | 1651 | 1003 | 647.67 | + | 1.55 | 1.13E-37 |
| modification-dependent protein catabolic process (GO:0019941)          | 400  | 243  | 156.92 | + | 1.55 | 6.54E-07 |
| vesicle-mediated transport (GO:0016192)                                | 960  | 583  | 376.60 | + | 1.55 | 3.34E-20 |
| ubiquitin-dependent protein catabolic process (GO:0006511)             | 392  | 238  | 153.78 | + | 1.55 | 1.07E-06 |
| regulation of system process (GO:0044057)                              | 496  | 301  | 194.57 | + | 1.55 | 4.30E-09 |
| muscle system process (GO:0003012)                                     | 234  | 142  | 91.80  | + | 1.55 | 5.17E-03 |
| proteasomal protein catabolic process (GO:0010498)                     | 211  | 128  | 82.77  | + | 1.55 | 1.80E-02 |
| regulation of nucleocytoplasmic transport (GO:0046822)                 | 216  | 131  | 84.73  | + | 1.55 | 1.40E-02 |
| regulation of MAPK cascade (GO:0043408)                                | 681  | 413  | 267.15 | + | 1.55 | 2.19E-13 |
| regulation of protein complex assembly (GO:0043254)                    | 343  | 208  | 134.55 | + | 1.55 | 1.65E-05 |
| response to glucocorticoid (GO:0051384)                                | 269  | 163  | 105.53 | + | 1.54 | 8.91E-04 |
| cellular response to abiotic stimulus (GO:0071214)                     | 307  | 186  | 120.43 | + | 1.54 | 1.21E-04 |
| inner ear development (GO:0048839)                                     | 213  | 129  | 83.56  | + | 1.54 | 1.79E-02 |
| carbohydrate derivative biosynthetic process (GO:1901137)              | 469  | 284  | 183.98 | + | 1.54 | 2.42E-08 |

|                                                                                   |      |      |         |   |      |          |
|-----------------------------------------------------------------------------------|------|------|---------|---|------|----------|
| lung development (GO:0030324)                                                     | 233  | 141  | 91.40   | + | 1.54 | 6.52E-03 |
| divalent inorganic cation transport (GO:0072511)                                  | 258  | 156  | 101.21  | + | 1.54 | 1.86E-03 |
| cellular localization (GO:0051641)                                                | 1645 | 994  | 645.31  | + | 1.54 | 2.10E-36 |
| phosphorylation (GO:0016310)                                                      | 1063 | 642  | 417.00  | + | 1.54 | 5.25E-22 |
| divalent metal ion transport (GO:0070838)                                         | 255  | 154  | 100.03  | + | 1.54 | 2.36E-03 |
| regulation of intracellular transport (GO:0032386)                                | 467  | 282  | 183.20  | + | 1.54 | 3.84E-08 |
| cell development (GO:0048468)                                                     | 1575 | 951  | 617.85  | + | 1.54 | 1.72E-34 |
| regulation of cellular protein localization (GO:1903827)                          | 545  | 329  | 213.80  | + | 1.54 | 6.75E-10 |
| positive regulation of MAPK cascade (GO:0043410)                                  | 474  | 286  | 185.94  | + | 1.54 | 2.95E-08 |
| regulation of lipid metabolic process (GO:0019216)                                | 300  | 181  | 117.69  | + | 1.54 | 2.46E-04 |
| modification-dependent macromolecule catabolic process (GO:0043632)               | 408  | 246  | 160.05  | + | 1.54 | 9.87E-07 |
| response to nitrogen compound (GO:1901698)                                        | 1092 | 658  | 428.38  | + | 1.54 | 2.14E-22 |
| negative regulation of transcription from RNA polymerase II promoter (GO:0000122) | 757  | 456  | 296.96  | + | 1.54 | 1.43E-14 |
| negative regulation of signal transduction (GO:0009968)                           | 1041 | 627  | 408.37  | + | 1.54 | 3.85E-21 |
| response to endogenous stimulus (GO:0009719)                                      | 1620 | 975  | 635.51  | + | 1.53 | 5.68E-35 |
| respiratory tube development (GO:0030323)                                         | 236  | 142  | 92.58   | + | 1.53 | 8.05E-03 |
| protein oligomerization (GO:0051259)                                              | 482  | 290  | 189.08  | + | 1.53 | 2.82E-08 |
| regulation of Wnt signaling pathway (GO:0030111)                                  | 246  | 148  | 96.50   | + | 1.53 | 4.87E-03 |
| apoptotic process (GO:0006915)                                                    | 675  | 406  | 264.79  | + | 1.53 | 1.39E-12 |
| intracellular protein transport (GO:0006886)                                      | 587  | 353  | 230.27  | + | 1.53 | 1.37E-10 |
| regulation of phosphorylation (GO:0042325)                                        | 1399 | 841  | 548.81  | + | 1.53 | 2.31E-29 |
| carbohydrate metabolic process (GO:0005975)                                       | 559  | 336  | 219.29  | + | 1.53 | 6.21E-10 |
| carbohydrate homeostasis (GO:0033500)                                             | 213  | 128  | 83.56   | + | 1.53 | 2.81E-02 |
| glucose homeostasis (GO:0042593)                                                  | 213  | 128  | 83.56   | + | 1.53 | 2.81E-02 |
| regulation of secretion by cell (GO:1903530)                                      | 694  | 417  | 272.25  | + | 1.53 | 6.29E-13 |
| regulation of epithelial cell proliferation (GO:0050678)                          | 323  | 194  | 126.71  | + | 1.53 | 1.11E-04 |
| response to acid chemical (GO:0001101)                                            | 403  | 242  | 158.09  | + | 1.53 | 1.98E-06 |
| regulation of intracellular protein transport (GO:0033157)                        | 370  | 222  | 145.15  | + | 1.53 | 1.14E-05 |
| response to estradiol (GO:0032355)                                                | 230  | 138  | 90.23   | + | 1.53 | 1.30E-02 |
| cell death (GO:0008219)                                                           | 745  | 447  | 292.25  | + | 1.53 | 5.96E-14 |
| regulation of cell communication (GO:0010646)                                     | 2764 | 1658 | 1084.28 | + | 1.53 | 6.80E-64 |
| regulation of signaling (GO:0023051)                                              | 2786 | 1671 | 1092.91 | + | 1.53 | 1.86E-64 |
| regulation of multicellular organismal development (GO:2000026)                   | 1784 | 1070 | 699.84  | + | 1.53 | 2.63E-38 |
| positive regulation of apoptotic process (GO:0043065)                             | 584  | 350  | 229.10  | + | 1.53 | 2.72E-10 |
| cellular macromolecule localization (GO:0070727)                                  | 1093 | 655  | 428.77  | + | 1.53 | 1.05E-21 |
| sulfur compound metabolic process (GO:0006790)                                    | 272  | 163  | 106.70  | + | 1.53 | 1.72E-03 |
| cellular protein localization (GO:0034613)                                        | 1085 | 650  | 425.63  | + | 1.53 | 1.75E-21 |

|                                                                   |      |      |        |   |      |          |
|-------------------------------------------------------------------|------|------|--------|---|------|----------|
| in utero embryonic development (GO:0001701)                       | 429  | 257  | 168.29 | + | 1.53 | 6.98E-07 |
| response to monosaccharide (GO:0034284)                           | 207  | 124  | 81.20  | + | 1.53 | 4.54E-02 |
| positive regulation of cell differentiation (GO:0045597)          | 940  | 563  | 368.75 | + | 1.53 | 3.69E-18 |
| intracellular transport (GO:0046907)                              | 904  | 541  | 354.63 | + | 1.53 | 2.91E-17 |
| macromolecule localization (GO:0033036)                           | 1795 | 1074 | 704.16 | + | 1.53 | 4.75E-38 |
| ion transmembrane transport (GO:0034220)                          | 709  | 424  | 278.13 | + | 1.52 | 7.09E-13 |
| apoptotic signaling pathway (GO:0097190)                          | 271  | 162  | 106.31 | + | 1.52 | 2.16E-03 |
| positive regulation of cell death (GO:0010942)                    | 629  | 376  | 246.75 | + | 1.52 | 4.27E-11 |
| positive regulation of cellular component biogenesis (GO:0044089) | 405  | 242  | 158.88 | + | 1.52 | 3.05E-06 |
| protein targeting (GO:0006605)                                    | 318  | 190  | 124.75 | + | 1.52 | 2.22E-04 |
| response to purine-containing compound (GO:0014074)               | 211  | 126  | 82.77  | + | 1.52 | 4.43E-02 |
| regulation of peptide hormone secretion (GO:0090276)              | 211  | 126  | 82.77  | + | 1.52 | 4.43E-02 |
| positive regulation of transport (GO:0051050)                     | 990  | 591  | 388.37 | + | 1.52 | 6.54E-19 |
| positive regulation of programmed cell death (GO:0043068)         | 588  | 351  | 230.67 | + | 1.52 | 4.12E-10 |
| programmed cell death (GO:0012501)                                | 702  | 419  | 275.39 | + | 1.52 | 1.45E-12 |
| organic hydroxy compound metabolic process (GO:1901615)           | 300  | 179  | 117.69 | + | 1.52 | 5.99E-04 |
| regulation of secretion (GO:0051046)                              | 743  | 443  | 291.47 | + | 1.52 | 2.29E-13 |
| protein ubiquitination (GO:0016567)                               | 515  | 307  | 202.03 | + | 1.52 | 1.83E-08 |
| ear development (GO:0043583)                                      | 240  | 143  | 94.15  | + | 1.52 | 1.22E-02 |
| cellular response to organic cyclic compound (GO:0071407)         | 549  | 327  | 215.37 | + | 1.52 | 3.89E-09 |
| response to wounding (GO:0009611)                                 | 455  | 271  | 178.49 | + | 1.52 | 3.80E-07 |
| regulation of protein modification process (GO:0031399)           | 1612 | 960  | 632.37 | + | 1.52 | 1.01E-32 |
| regulation of phosphate metabolic process (GO:0019220)            | 1622 | 965  | 636.29 | + | 1.52 | 9.15E-33 |
| muscle organ development (GO:0007517)                             | 264  | 157  | 103.56 | + | 1.52 | 4.36E-03 |
| taxis (GO:0042330)                                                | 412  | 245  | 161.62 | + | 1.52 | 3.62E-06 |
| regulation of phosphorus metabolic process (GO:0051174)           | 1623 | 965  | 636.68 | + | 1.52 | 1.14E-32 |
| regulation of protein stability (GO:0031647)                      | 217  | 129  | 85.13  | + | 1.52 | 4.26E-02 |
| regulation of protein localization (GO:0032880)                   | 971  | 577  | 380.91 | + | 1.51 | 5.63E-18 |
| heart morphogenesis (GO:0003007)                                  | 229  | 136  | 89.83  | + | 1.51 | 2.54E-02 |
| response to corticosteroid (GO:0031960)                           | 293  | 174  | 114.94 | + | 1.51 | 1.21E-03 |
| regulation of peptidyl-tyrosine phosphorylation (GO:0050730)      | 224  | 133  | 87.87  | + | 1.51 | 3.27E-02 |
| camera-type eye development (GO:0043010)                          | 337  | 200  | 132.20 | + | 1.51 | 1.57E-04 |
| positive regulation of catalytic activity (GO:0043085)            | 1252 | 743  | 491.14 | + | 1.51 | 5.88E-24 |
| regulation of hormone secretion (GO:0046883)                      | 273  | 162  | 107.09 | + | 1.51 | 3.30E-03 |
| regulation of protein phosphorylation (GO:0001932)                | 1297 | 769  | 508.80 | + | 1.51 | 8.12E-25 |
| protein modification by small protein conjugation (GO:0032446)    | 555  | 329  | 217.72 | + | 1.51 | 5.75E-09 |
| response to reactive oxygen species (GO:0000302)                  | 221  | 131  | 86.70  | + | 1.51 | 4.15E-02 |

|                                                                           |      |      |         |   |      |          |
|---------------------------------------------------------------------------|------|------|---------|---|------|----------|
| eye development (GO:0001654)                                              | 383  | 227  | 150.25  | + | 1.51 | 2.02E-05 |
| chemotaxis (GO:0006935)                                                   | 410  | 243  | 160.84  | + | 1.51 | 5.66E-06 |
| cytoskeleton organization (GO:0007010)                                    | 859  | 509  | 336.98  | + | 1.51 | 2.76E-15 |
| regulation of developmental process (GO:0050793)                          | 2362 | 1399 | 926.58  | + | 1.51 | 2.30E-49 |
| cellular response to lipid (GO:0071396)                                   | 522  | 309  | 204.77  | + | 1.51 | 3.33E-08 |
| positive regulation of developmental process (GO:0051094)                 | 1300 | 769  | 509.97  | + | 1.51 | 1.54E-24 |
| positive regulation of GTPase activity (GO:0043547)                       | 443  | 262  | 173.78  | + | 1.51 | 1.51E-06 |
| negative regulation of cell proliferation (GO:0008285)                    | 629  | 372  | 246.75  | + | 1.51 | 2.44E-10 |
| cellular response to oxygen-containing compound (GO:1901701)              | 937  | 554  | 367.57  | + | 1.51 | 1.04E-16 |
| inorganic cation transmembrane transport (GO:0098662)                     | 467  | 276  | 183.20  | + | 1.51 | 5.36E-07 |
| cellular protein modification process (GO:0006464)                        | 2383 | 1408 | 934.82  | + | 1.51 | 3.54E-49 |
| protein modification process (GO:0036211)                                 | 2383 | 1408 | 934.82  | + | 1.51 | 3.54E-49 |
| regulation of cellular response to stress (GO:0080135)                    | 530  | 313  | 207.91  | + | 1.51 | 3.13E-08 |
| positive regulation of molecular function (GO:0044093)                    | 1557 | 919  | 610.79  | + | 1.50 | 8.03E-30 |
| negative regulation of multicellular organismal process (GO:0051241)      | 1064 | 628  | 417.39  | + | 1.50 | 3.47E-19 |
| response to extracellular stimulus (GO:0009991)                           | 593  | 350  | 232.63  | + | 1.50 | 1.81E-09 |
| positive regulation of protein modification process (GO:0031401)          | 1068 | 630  | 418.96  | + | 1.50 | 3.35E-19 |
| response to metal ion (GO:0010038)                                        | 434  | 256  | 170.25  | + | 1.50 | 3.08E-06 |
| small molecule biosynthetic process (GO:0044283)                          | 334  | 197  | 131.02  | + | 1.50 | 3.06E-04 |
| positive regulation of phosphorylation (GO:0042327)                       | 919  | 542  | 360.51  | + | 1.50 | 4.49E-16 |
| positive regulation of secretion by cell (GO:1903532)                     | 390  | 230  | 152.99  | + | 1.50 | 2.38E-05 |
| regulation of organelle organization (GO:0033043)                         | 1099 | 648  | 431.12  | + | 1.50 | 8.46E-20 |
| regulation of hormone levels (GO:0010817)                                 | 489  | 288  | 191.83  | + | 1.50 | 2.95E-07 |
| regulation of intracellular signal transduction (GO:1902531)              | 1513 | 891  | 593.53  | + | 1.50 | 1.85E-28 |
| cellular component disassembly (GO:0022411)                               | 282  | 166  | 110.63  | + | 1.50 | 3.83E-03 |
| establishment of protein localization to organelle (GO:0072594)           | 267  | 157  | 104.74  | + | 1.50 | 8.14E-03 |
| regulation of cell migration (GO:0030334)                                 | 711  | 418  | 278.92  | + | 1.50 | 1.46E-11 |
| macromolecule modification (GO:0043412)                                   | 2576 | 1514 | 1010.53 | + | 1.50 | 2.93E-52 |
| epithelium development (GO:0060429)                                       | 1009 | 593  | 395.82  | + | 1.50 | 1.49E-17 |
| system development (GO:0048731)                                           | 4152 | 2439 | 1628.78 | + | 1.50 | 1.90E-93 |
| protein modification by small protein conjugation or removal (GO:0070647) | 676  | 397  | 265.19  | + | 1.50 | 8.74E-11 |
| response to organic cyclic compound (GO:0014070)                          | 1209 | 710  | 474.28  | + | 1.50 | 1.40E-21 |
| regulation of biological quality (GO:0065008)                             | 3322 | 1949 | 1303.18 | + | 1.50 | 3.23E-70 |
| gland development (GO:0048732)                                            | 537  | 315  | 210.66  | + | 1.50 | 5.60E-08 |
| chordate embryonic development (GO:0043009)                               | 699  | 410  | 274.21  | + | 1.50 | 3.79E-11 |
| positive regulation of signaling (GO:0023056)                             | 1468 | 861  | 575.88  | + | 1.50 | 8.16E-27 |
| monovalent inorganic cation transport (GO:0015672)                        | 370  | 217  | 145.15  | + | 1.50 | 9.91E-05 |

|                                                                       |      |      |         |   |      |          |
|-----------------------------------------------------------------------|------|------|---------|---|------|----------|
| respiratory system development (GO:0060541)                           | 266  | 156  | 104.35  | + | 1.49 | 1.01E-02 |
| membrane organization (GO:0061024)                                    | 747  | 438  | 293.04  | + | 1.49 | 4.57E-12 |
| positive regulation of phosphorus metabolic process (GO:0010562)      | 1037 | 608  | 406.80  | + | 1.49 | 7.44E-18 |
| positive regulation of phosphate metabolic process (GO:0045937)       | 1037 | 608  | 406.80  | + | 1.49 | 7.44E-18 |
| positive regulation of intracellular signal transduction (GO:1902533) | 884  | 518  | 346.78  | + | 1.49 | 1.00E-14 |
| positive regulation of cell communication (GO:0010647)                | 1461 | 856  | 573.13  | + | 1.49 | 1.70E-26 |
| anatomical structure formation involved in morphogenesis (GO:0048646) | 990  | 580  | 388.37  | + | 1.49 | 8.00E-17 |
| sensory organ development (GO:0007423)                                | 589  | 345  | 231.06  | + | 1.49 | 6.69E-09 |
| negative regulation of response to stimulus (GO:0048585)              | 1346 | 788  | 528.02  | + | 1.49 | 5.59E-24 |
| response to inorganic substance (GO:0010035)                          | 629  | 368  | 246.75  | + | 1.49 | 1.34E-09 |
| positive regulation of protein phosphorylation (GO:0001934)           | 877  | 513  | 344.04  | + | 1.49 | 2.02E-14 |
| response to radiation (GO:0009314)                                    | 477  | 279  | 187.12  | + | 1.49 | 1.15E-06 |
| embryo development ending in birth or egg hatching (GO:0009792)       | 708  | 414  | 277.74  | + | 1.49 | 4.32E-11 |
| inorganic ion transmembrane transport (GO:0098660)                    | 551  | 322  | 216.15  | + | 1.49 | 4.97E-08 |
| regulation of cellular component movement (GO:0051270)                | 813  | 475  | 318.93  | + | 1.49 | 4.63E-13 |
| regulation of signal transduction (GO:0009966)                        | 2441 | 1426 | 957.57  | + | 1.49 | 2.62E-47 |
| cation transmembrane transport (GO:0098655)                           | 529  | 309  | 207.52  | + | 1.49 | 1.39E-07 |
| single-organism localization (GO:1902578)                             | 2021 | 1180 | 792.81  | + | 1.49 | 8.55E-38 |
| blood circulation (GO:0008015)                                        | 370  | 216  | 145.15  | + | 1.49 | 1.51E-04 |
| response to nutrient levels (GO:0031667)                              | 567  | 331  | 222.43  | + | 1.49 | 2.85E-08 |
| sensory organ morphogenesis (GO:0090596)                              | 281  | 164  | 110.23  | + | 1.49 | 7.27E-03 |
| regulation of homeostatic process (GO:0032844)                        | 473  | 276  | 185.55  | + | 1.49 | 1.81E-06 |
| regulation of protein transport (GO:0051223)                          | 763  | 445  | 299.32  | + | 1.49 | 6.02E-12 |
| response to oxygen-containing compound (GO:1901700)                   | 1710 | 996  | 670.81  | + | 1.48 | 1.15E-30 |
| positive regulation of secretion (GO:0051047)                         | 419  | 244  | 164.37  | + | 1.48 | 2.31E-05 |
| positive regulation of hydrolase activity (GO:0051345)                | 732  | 426  | 287.15  | + | 1.48 | 3.47E-11 |
| cation transport (GO:0006812)                                         | 720  | 419  | 282.45  | + | 1.48 | 5.88E-11 |
| regulation of protein targeting (GO:1903533)                          | 299  | 174  | 117.29  | + | 1.48 | 4.11E-03 |
| regulation of molecular function (GO:0065009)                         | 2574 | 1497 | 1009.75 | + | 1.48 | 4.89E-49 |
| response to oxidative stress (GO:0006979)                             | 411  | 239  | 161.23  | + | 1.48 | 3.75E-05 |
| multicellular organism development (GO:0007275)                       | 4547 | 2644 | 1783.73 | + | 1.48 | 6.00E-99 |
| circulatory system process (GO:0003013)                               | 375  | 218  | 147.11  | + | 1.48 | 1.77E-04 |
| small molecule catabolic process (GO:0044282)                         | 246  | 143  | 96.50   | + | 1.48 | 4.21E-02 |
| cellular divalent inorganic cation homeostasis (GO:0072503)           | 346  | 201  | 135.73  | + | 1.48 | 6.42E-04 |
| cellular protein catabolic process (GO:0044257)                       | 482  | 280  | 189.08  | + | 1.48 | 2.06E-06 |
| divalent inorganic cation homeostasis (GO:0072507)                    | 372  | 216  | 145.93  | + | 1.48 | 2.24E-04 |
| cellular calcium ion homeostasis (GO:0006874)                         | 329  | 191  | 129.06  | + | 1.48 | 1.38E-03 |

|                                                                          |      |      |         |   |      |           |
|--------------------------------------------------------------------------|------|------|---------|---|------|-----------|
| transport (GO:0006810)                                                   | 3305 | 1918 | 1296.51 | + | 1.48 | 2.16E-65  |
| muscle tissue development (GO:0060537)                                   | 324  | 188  | 127.10  | + | 1.48 | 1.78E-03  |
| cation homeostasis (GO:0055080)                                          | 555  | 322  | 217.72  | + | 1.48 | 1.10E-07  |
| cell migration (GO:0016477)                                              | 712  | 413  | 279.31  | + | 1.48 | 1.45E-10  |
| inorganic ion homeostasis (GO:0098771)                                   | 571  | 331  | 224.00  | + | 1.48 | 6.27E-08  |
| regulation of locomotion (GO:0040012)                                    | 787  | 456  | 308.73  | + | 1.48 | 7.23E-12  |
| positive regulation of cellular protein metabolic process (GO:0032270)   | 1348 | 781  | 528.80  | + | 1.48 | 1.68E-22  |
| establishment of localization (GO:0051234)                               | 3456 | 2001 | 1355.75 | + | 1.48 | 4.01E-68  |
| anatomical structure morphogenesis (GO:0009653)                          | 2139 | 1238 | 839.10  | + | 1.48 | 2.79E-38  |
| regulation of establishment of protein localization (GO:0070201)         | 819  | 474  | 321.28  | + | 1.48 | 2.31E-12  |
| cellular chemical homeostasis (GO:0055082)                               | 617  | 357  | 242.04  | + | 1.47 | 1.19E-08  |
| RNA biosynthetic process (GO:0032774)                                    | 1215 | 703  | 476.63  | + | 1.47 | 9.29E-20  |
| positive regulation of cell cycle (GO:0045787)                           | 299  | 173  | 117.29  | + | 1.47 | 6.21E-03  |
| single-organism transport (GO:0044765)                                   | 1801 | 1042 | 706.51  | + | 1.47 | 3.01E-31  |
| positive regulation of proteolysis (GO:0045862)                          | 294  | 170  | 115.33  | + | 1.47 | 7.97E-03  |
| chemical homeostasis (GO:0048878)                                        | 927  | 536  | 363.65  | + | 1.47 | 2.84E-14  |
| nucleic acid-templated transcription (GO:0097659)                        | 1202 | 695  | 471.53  | + | 1.47 | 2.01E-19  |
| proteolysis involved in cellular protein catabolic process (GO:0051603)  | 467  | 270  | 183.20  | + | 1.47 | 6.57E-06  |
| negative regulation of nucleic acid-templated transcription (GO:1903507) | 1095 | 633  | 429.56  | + | 1.47 | 2.22E-17  |
| negative regulation of cell death (GO:0060548)                           | 967  | 559  | 379.34  | + | 1.47 | 5.43E-15  |
| negative regulation of transcription, DNA-templated (GO:0045892)         | 1076 | 622  | 422.10  | + | 1.47 | 5.08E-17  |
| regulation of mitotic cell cycle (GO:0007346)                            | 391  | 226  | 153.38  | + | 1.47 | 1.53E-04  |
| transcription, DNA-templated (GO:0006351)                                | 1201 | 694  | 471.14  | + | 1.47 | 2.50E-19  |
| cell proliferation (GO:0008283)                                          | 566  | 327  | 222.03  | + | 1.47 | 1.21E-07  |
| reproductive structure development (GO:0048608)                          | 502  | 290  | 196.93  | + | 1.47 | 1.71E-06  |
| positive regulation of organelle organization (GO:0010638)               | 580  | 335  | 227.53  | + | 1.47 | 7.06E-08  |
| single-multicellular organism process (GO:0044707)                       | 5153 | 2976 | 2021.46 | + | 1.47 | 3.88E-112 |
| positive regulation of signal transduction (GO:0009967)                  | 1306 | 754  | 512.33  | + | 1.47 | 3.36E-21  |
| ion homeostasis (GO:0050801)                                             | 577  | 333  | 226.35  | + | 1.47 | 8.90E-08  |
| single-organism intracellular transport (GO:1902582)                     | 371  | 214  | 145.54  | + | 1.47 | 4.16E-04  |
| negative regulation of RNA biosynthetic process (GO:1902679)             | 1110 | 640  | 435.44  | + | 1.47 | 2.32E-17  |
| protein localization to organelle (GO:0033365)                           | 477  | 275  | 187.12  | + | 1.47 | 5.97E-06  |
| mitotic cell cycle (GO:0000278)                                          | 484  | 279  | 189.87  | + | 1.47 | 4.56E-06  |
| regulation of apoptotic signaling pathway (GO:2001233)                   | 380  | 219  | 149.07  | + | 1.47 | 3.12E-04  |
| peptidyl-amino acid modification (GO:0018193)                            | 703  | 405  | 275.78  | + | 1.47 | 6.63E-10  |
| striated muscle tissue development (GO:0014706)                          | 309  | 178  | 121.22  | + | 1.47 | 5.65E-03  |
| regulation of cell motility (GO:2000145)                                 | 750  | 432  | 294.22  | + | 1.47 | 9.94E-11  |



|                                                                                   |      |      |         |   |      |          |
|-----------------------------------------------------------------------------------|------|------|---------|---|------|----------|
| response to lipid (GO:0033993)                                                    | 1099 | 633  | 431.12  | + | 1.47 | 4.85E-17 |
| reproductive system development (GO:0061458)                                      | 507  | 292  | 198.89  | + | 1.47 | 1.99E-06 |
| metal ion homeostasis (GO:0055065)                                                | 488  | 281  | 191.44  | + | 1.47 | 4.39E-06 |
| wound healing (GO:0042060)                                                        | 337  | 194  | 132.20  | + | 1.47 | 1.93E-03 |
| regulation of multicellular organismal process (GO:0051239)                       | 2658 | 1530 | 1042.70 | + | 1.47 | 7.83E-48 |
| tissue development (GO:0009888)                                                   | 1608 | 925  | 630.80  | + | 1.47 | 2.09E-26 |
| positive regulation of transcription from RNA polymerase II promoter (GO:0045944) | 1050 | 604  | 411.90  | + | 1.47 | 5.28E-16 |
| negative regulation of apoptotic process (GO:0043066)                             | 864  | 497  | 338.94  | + | 1.47 | 1.18E-12 |
| negative regulation of cellular macromolecule biosynthetic process (GO:2000113)   | 1250 | 719  | 490.36  | + | 1.47 | 1.17E-19 |
| locomotion (GO:0040011)                                                           | 980  | 563  | 384.44  | + | 1.46 | 1.31E-14 |
| positive regulation of cellular protein localization (GO:1903829)                 | 343  | 197  | 134.55  | + | 1.46 | 1.82E-03 |
| single-organism biosynthetic process (GO:0044711)                                 | 841  | 483  | 329.91  | + | 1.46 | 4.15E-12 |
| cell differentiation (GO:0030154)                                                 | 3267 | 1875 | 1281.60 | + | 1.46 | 3.06E-60 |
| localization (GO:0051179)                                                         | 4363 | 2504 | 1711.55 | + | 1.46 | 1.32E-86 |
| single-organism organelle organization (GO:1902589)                               | 1369 | 785  | 537.04  | + | 1.46 | 1.97E-21 |
| protein catabolic process (GO:0030163)                                            | 513  | 294  | 201.24  | + | 1.46 | 2.80E-06 |
| negative regulation of RNA metabolic process (GO:0051253)                         | 1157 | 663  | 453.88  | + | 1.46 | 1.67E-17 |
| positive regulation of protein metabolic process (GO:0051247)                     | 1438 | 824  | 564.11  | + | 1.46 | 1.33E-22 |
| transmembrane transport (GO:0055085)                                              | 1042 | 597  | 408.76  | + | 1.46 | 1.95E-15 |
| regulation of cell death (GO:0010941)                                             | 1550 | 888  | 608.05  | + | 1.46 | 1.22E-24 |
| negative regulation of programmed cell death (GO:0043069)                         | 878  | 503  | 344.43  | + | 1.46 | 1.52E-12 |
| regulation of catalytic activity (GO:0050790)                                     | 2047 | 1172 | 803.01  | + | 1.46 | 5.64E-34 |
| positive regulation of intracellular transport (GO:0032388)                       | 290  | 166  | 113.76  | + | 1.46 | 1.85E-02 |
| positive regulation of nucleic acid-templated transcription (GO:1903508)          | 1328 | 760  | 520.96  | + | 1.46 | 2.04E-20 |
| positive regulation of transcription, DNA-templated (GO:0045893)                  | 1328 | 760  | 520.96  | + | 1.46 | 2.04E-20 |
| epithelial cell differentiation (GO:0030855)                                      | 519  | 297  | 203.60  | + | 1.46 | 2.63E-06 |
| embryo development (GO:0009790)                                                   | 1049 | 600  | 411.51  | + | 1.46 | 2.21E-15 |
| positive regulation of RNA biosynthetic process (GO:1902680)                      | 1331 | 761  | 522.14  | + | 1.46 | 2.42E-20 |
| mitotic cell cycle process (GO:1903047)                                           | 453  | 259  | 177.71  | + | 1.46 | 3.75E-05 |
| negative regulation of macromolecule biosynthetic process (GO:0010558)            | 1315 | 751  | 515.86  | + | 1.46 | 6.62E-20 |
| calcium ion homeostasis (GO:0055074)                                              | 345  | 197  | 135.34  | + | 1.46 | 2.66E-03 |
| organophosphate metabolic process (GO:0019637)                                    | 703  | 401  | 275.78  | + | 1.45 | 3.28E-09 |
| animal organ development (GO:0048513)                                             | 3159 | 1801 | 1239.24 | + | 1.45 | 1.83E-55 |
| cellular response to chemical stimulus (GO:0070887)                               | 2174 | 1239 | 852.83  | + | 1.45 | 2.07E-35 |
| negative regulation of cellular biosynthetic process (GO:0031327)                 | 1374 | 782  | 539.00  | + | 1.45 | 1.74E-20 |
| positive regulation of RNA metabolic process (GO:0051254)                         | 1383 | 787  | 542.53  | + | 1.45 | 1.27E-20 |
| regulation of apoptotic process (GO:0042981)                                      | 1412 | 803  | 553.91  | + | 1.45 | 4.82E-21 |

|                                                                                      |      |      |         |   |      |           |
|--------------------------------------------------------------------------------------|------|------|---------|---|------|-----------|
| negative regulation of biosynthetic process (GO:0009890)                             | 1405 | 799  | 551.16  | + | 1.45 | 6.44E-21  |
| cellular response to organic substance (GO:0071310)                                  | 1771 | 1007 | 694.74  | + | 1.45 | 2.02E-27  |
| cellular cation homeostasis (GO:0030003)                                             | 482  | 274  | 189.08  | + | 1.45 | 2.27E-05  |
| positive regulation of multicellular organismal process (GO:0051240)                 | 1543 | 877  | 605.30  | + | 1.45 | 2.88E-23  |
| regulation of programmed cell death (GO:0043067)                                     | 1427 | 811  | 559.79  | + | 1.45 | 3.25E-21  |
| negative regulation of nitrogen compound metabolic process (GO:0051172)              | 1422 | 808  | 557.83  | + | 1.45 | 4.24E-21  |
| cellular metal ion homeostasis (GO:0006875)                                          | 426  | 242  | 167.11  | + | 1.45 | 1.96E-04  |
| single-organism developmental process (GO:0044767)                                   | 5217 | 2962 | 2046.57 | + | 1.45 | 1.40E-102 |
| carbohydrate derivative metabolic process (GO:1901135)                               | 828  | 470  | 324.81  | + | 1.45 | 6.34E-11  |
| negative regulation of gene expression (GO:0010629)                                  | 1390 | 789  | 545.28  | + | 1.45 | 2.13E-20  |
| embryonic morphogenesis (GO:0048598)                                                 | 615  | 349  | 241.26  | + | 1.45 | 1.97E-07  |
| cellular lipid metabolic process (GO:0044255)                                        | 749  | 425  | 293.82  | + | 1.45 | 1.33E-09  |
| anatomical structure development (GO:0048856)                                        | 4940 | 2803 | 1937.90 | + | 1.45 | 6.13E-95  |
| negative regulation of nucleobase-containing compound metabolic process (GO:0045934) | 1299 | 737  | 509.58  | + | 1.45 | 9.02E-19  |
| negative regulation of cellular process (GO:0048523)                                 | 4088 | 2319 | 1603.67 | + | 1.45 | 4.64E-74  |
| regulation of cell cycle (GO:0051726)                                                | 811  | 460  | 318.15  | + | 1.45 | 1.38E-10  |
| developmental process (GO:0032502)                                                   | 5248 | 2976 | 2058.73 | + | 1.45 | 1.28E-102 |
| response to organic substance (GO:0010033)                                           | 2713 | 1538 | 1064.28 | + | 1.45 | 1.62E-44  |
| movement of cell or subcellular component (GO:0006928)                               | 1122 | 636  | 440.15  | + | 1.44 | 1.14E-15  |
| organophosphate biosynthetic process (GO:0090407)                                    | 337  | 191  | 132.20  | + | 1.44 | 6.32E-03  |
| protein complex subunit organization (GO:0071822)                                    | 1034 | 586  | 405.63  | + | 1.44 | 3.49E-14  |
| lipid biosynthetic process (GO:0008610)                                              | 383  | 217  | 150.25  | + | 1.44 | 1.21E-03  |
| cellular ion homeostasis (GO:0006873)                                                | 496  | 281  | 194.57  | + | 1.44 | 1.96E-05  |
| positive regulation of nucleobase-containing compound metabolic process (GO:0045935) | 1617 | 916  | 634.33  | + | 1.44 | 4.82E-24  |
| regulation of transcription from RNA polymerase II promoter (GO:0006357)             | 1771 | 1003 | 694.74  | + | 1.44 | 1.03E-26  |
| cellular developmental process (GO:0048869)                                          | 3473 | 1965 | 1362.42 | + | 1.44 | 2.32E-59  |
| cofactor metabolic process (GO:0051186)                                              | 327  | 185  | 128.28  | + | 1.44 | 1.04E-02  |
| positive regulation of nitrogen compound metabolic process (GO:0051173)              | 1727 | 977  | 677.48  | + | 1.44 | 9.58E-26  |
| negative regulation of protein metabolic process (GO:0051248)                        | 998  | 564  | 391.50  | + | 1.44 | 2.57E-13  |
| cellular response to stress (GO:0033554)                                             | 1412 | 796  | 553.91  | + | 1.44 | 7.85E-20  |
| skeletal system development (GO:0001501)                                             | 456  | 257  | 178.88  | + | 1.44 | 1.41E-04  |
| protein complex assembly (GO:0006461)                                                | 921  | 519  | 361.30  | + | 1.44 | 8.06E-12  |
| protein complex biogenesis (GO:0070271)                                              | 921  | 519  | 361.30  | + | 1.44 | 8.06E-12  |
| nucleobase-containing compound biosynthetic process (GO:0034654)                     | 1475 | 831  | 578.62  | + | 1.44 | 8.57E-21  |
| heterocycle biosynthetic process (GO:0018130)                                        | 1532 | 863  | 600.99  | + | 1.44 | 1.00E-21  |
| positive regulation of macromolecule metabolic process (GO:0010604)                  | 2718 | 1531 | 1066.24 | + | 1.44 | 8.49E-43  |
| regulation of cell cycle process (GO:0010564)                                        | 476  | 268  | 186.73  | + | 1.44 | 7.71E-05  |

|                                                                                        |      |      |         |   |      |          |
|----------------------------------------------------------------------------------------|------|------|---------|---|------|----------|
| positive regulation of cellular metabolic process (GO:0031325)                         | 2727 | 1535 | 1069.77 | + | 1.43 | 9.00E-43 |
| organ morphogenesis (GO:0009887)                                                       | 933  | 525  | 366.00  | + | 1.43 | 6.97E-12 |
| negative regulation of biological process (GO:0048519)                                 | 4402 | 2476 | 1726.85 | + | 1.43 | 3.95E-77 |
| aromatic compound biosynthetic process (GO:0019438)                                    | 1546 | 868  | 606.48  | + | 1.43 | 1.82E-21 |
| positive regulation of cellular biosynthetic process (GO:0031328)                      | 1689 | 947  | 662.57  | + | 1.43 | 1.31E-23 |
| organic cyclic compound biosynthetic process (GO:1901362)                              | 1636 | 917  | 641.78  | + | 1.43 | 1.09E-22 |
| positive regulation of cellular process (GO:0048522)                                   | 4627 | 2593 | 1815.12 | + | 1.43 | 2.30E-80 |
| negative regulation of cellular protein metabolic process (GO:0032269)                 | 939  | 526  | 368.36  | + | 1.43 | 1.39E-11 |
| regulation of cellular protein metabolic process (GO:0032268)                          | 2291 | 1283 | 898.73  | + | 1.43 | 1.40E-33 |
| negative regulation of molecular function (GO:0044092)                                 | 1020 | 571  | 400.13  | + | 1.43 | 9.12E-13 |
| positive regulation of biological process (GO:0048518)                                 | 5076 | 2840 | 1991.25 | + | 1.43 | 6.24E-90 |
| cellular catabolic process (GO:0044248)                                                | 1095 | 612  | 429.56  | + | 1.42 | 9.29E-14 |
| positive regulation of metabolic process (GO:0009893)                                  | 2913 | 1628 | 1142.73 | + | 1.42 | 3.57E-44 |
| positive regulation of biosynthetic process (GO:0009891)                               | 1726 | 964  | 677.09  | + | 1.42 | 1.39E-23 |
| positive regulation of gene expression (GO:0010628)                                    | 1650 | 921  | 647.28  | + | 1.42 | 2.88E-22 |
| positive regulation of cell proliferation (GO:0008284)                                 | 887  | 495  | 347.96  | + | 1.42 | 1.75E-10 |
| microtubule cytoskeleton organization (GO:0000226)                                     | 362  | 202  | 142.01  | + | 1.42 | 8.44E-03 |
| cellular homeostasis (GO:0019725)                                                      | 733  | 409  | 287.55  | + | 1.42 | 3.40E-08 |
| regulation of protein metabolic process (GO:0051246)                                   | 2436 | 1359 | 955.61  | + | 1.42 | 3.29E-35 |
| positive regulation of cell migration (GO:0030335)                                     | 427  | 238  | 167.51  | + | 1.42 | 1.07E-03 |
| positive regulation of macromolecule biosynthetic process (GO:0010557)                 | 1564 | 871  | 613.54  | + | 1.42 | 1.45E-20 |
| cellular macromolecule catabolic process (GO:0044265)                                  | 627  | 349  | 245.96  | + | 1.42 | 1.66E-06 |
| negative regulation of macromolecule metabolic process (GO:0010605)                    | 2186 | 1215 | 857.54  | + | 1.42 | 3.58E-30 |
| cell adhesion (GO:0007155)                                                             | 871  | 484  | 341.68  | + | 1.42 | 6.54E-10 |
| negative regulation of metabolic process (GO:0009892)                                  | 2389 | 1326 | 937.18  | + | 1.41 | 3.18E-33 |
| regulation of sequence-specific DNA binding transcription factor activity (GO:0051090) | 346  | 192  | 135.73  | + | 1.41 | 2.14E-02 |
| biological adhesion (GO:0022610)                                                       | 882  | 489  | 346.00  | + | 1.41 | 6.83E-10 |
| negative regulation of cellular metabolic process (GO:0031324)                         | 2237 | 1240 | 877.55  | + | 1.41 | 1.93E-30 |
| localization of cell (GO:0051674)                                                      | 793  | 439  | 311.08  | + | 1.41 | 1.60E-08 |
| cell motility (GO:0048870)                                                             | 793  | 439  | 311.08  | + | 1.41 | 1.60E-08 |
| negative regulation of cell cycle (GO:0045786)                                         | 327  | 181  | 128.28  | + | 1.41 | 4.66E-02 |
| regulation of response to stimulus (GO:0048583)                                        | 3270 | 1810 | 1282.78 | + | 1.41 | 1.14E-47 |
| regulation of protein secretion (GO:0050708)                                           | 409  | 226  | 160.45  | + | 1.41 | 3.99E-03 |
| positive regulation of locomotion (GO:0040017)                                         | 455  | 251  | 178.49  | + | 1.41 | 1.10E-03 |
| lipid metabolic process (GO:0006629)                                                   | 959  | 529  | 376.20  | + | 1.41 | 1.44E-10 |
| cellular component organization (GO:0016043)                                           | 4702 | 2593 | 1844.54 | + | 1.41 | 1.01E-73 |
| regulation of cell proliferation (GO:0042127)                                          | 1562 | 859  | 612.75  | + | 1.40 | 9.41E-19 |

|                                                                           |      |      |         |   |      |          |
|---------------------------------------------------------------------------|------|------|---------|---|------|----------|
| regulation of body fluid levels (GO:0050878)                              | 353  | 194  | 138.48  | + | 1.40 | 3.37E-02 |
| single-organism catabolic process (GO:0044712)                            | 608  | 334  | 238.51  | + | 1.40 | 1.55E-05 |
| positive regulation of establishment of protein localization (GO:1904951) | 521  | 286  | 204.38  | + | 1.40 | 2.34E-04 |
| positive regulation of cell motility (GO:2000147)                         | 441  | 242  | 173.00  | + | 1.40 | 2.67E-03 |
| positive regulation of cellular component movement (GO:0051272)           | 452  | 248  | 177.31  | + | 1.40 | 1.95E-03 |
| positive regulation of protein transport (GO:0051222)                     | 485  | 266  | 190.26  | + | 1.40 | 7.51E-04 |
| cellular component assembly (GO:0022607)                                  | 1865 | 1019 | 731.62  | + | 1.39 | 4.17E-22 |
| homeostatic process (GO:0042592)                                          | 1407 | 768  | 551.95  | + | 1.39 | 1.25E-15 |
| cell-cell adhesion (GO:0098609)                                           | 596  | 325  | 233.80  | + | 1.39 | 5.21E-05 |
| embryonic organ development (GO:0048568)                                  | 477  | 260  | 187.12  | + | 1.39 | 1.68E-03 |
| negative regulation of catalytic activity (GO:0043086)                    | 751  | 409  | 294.61  | + | 1.39 | 6.89E-07 |
| catabolic process (GO:0009056)                                            | 1326 | 722  | 520.17  | + | 1.39 | 2.89E-14 |
| macromolecule catabolic process (GO:0009057)                              | 713  | 388  | 279.70  | + | 1.39 | 2.30E-06 |
| covalent chromatin modification (GO:0016569)                              | 379  | 206  | 148.68  | + | 1.39 | 3.43E-02 |
| single-organism metabolic process (GO:0044710)                            | 2872 | 1559 | 1126.65 | + | 1.38 | 1.89E-35 |
| organic substance catabolic process (GO:1901575)                          | 1264 | 686  | 495.85  | + | 1.38 | 4.15E-13 |
| regulation of hydrolase activity (GO:0051336)                             | 1184 | 642  | 464.47  | + | 1.38 | 5.34E-12 |
| cellular component organization or biogenesis (GO:0071840)                | 4917 | 2661 | 1928.88 | + | 1.38 | 1.47E-68 |
| mitochondrion organization (GO:0007005)                                   | 480  | 259  | 188.30  | + | 1.38 | 3.81E-03 |
| pattern specification process (GO:0007389)                                | 456  | 246  | 178.88  | + | 1.38 | 7.37E-03 |
| endocytosis (GO:0006897)                                                  | 445  | 240  | 174.57  | + | 1.37 | 1.01E-02 |
| response to external stimulus (GO:0009605)                                | 1979 | 1067 | 776.34  | + | 1.37 | 1.76E-21 |
| organelle organization (GO:0006996)                                       | 2821 | 1520 | 1106.64 | + | 1.37 | 7.72E-33 |
| small molecule metabolic process (GO:0044281)                             | 1428 | 767  | 560.19  | + | 1.37 | 5.14E-14 |
| positive regulation of response to stimulus (GO:0048584)                  | 1778 | 954  | 697.49  | + | 1.37 | 3.59E-18 |
| cell surface receptor signaling pathway (GO:0007166)                      | 1656 | 887  | 649.63  | + | 1.37 | 1.95E-16 |
| regulation of response to stress (GO:0080134)                             | 1142 | 611  | 447.99  | + | 1.36 | 2.99E-10 |
| single organism cell adhesion (GO:0098602)                                | 473  | 253  | 185.55  | + | 1.36 | 9.64E-03 |
| single organismal cell-cell adhesion (GO:0016337)                         | 448  | 239  | 175.75  | + | 1.36 | 2.23E-02 |
| regulation of cell adhesion (GO:0030155)                                  | 619  | 330  | 242.83  | + | 1.36 | 3.40E-04 |
| hemopoiesis (GO:0030097)                                                  | 580  | 309  | 227.53  | + | 1.36 | 9.58E-04 |
| regulation of primary metabolic process (GO:0080090)                      | 5149 | 2738 | 2019.89 | + | 1.36 | 4.59E-64 |
| nucleobase-containing small molecule metabolic process (GO:0055086)       | 471  | 250  | 184.77  | + | 1.35 | 1.90E-02 |
| microtubule-based process (GO:0007017)                                    | 528  | 280  | 207.13  | + | 1.35 | 5.25E-03 |
| regulation of macromolecule metabolic process (GO:0060255)                | 5150 | 2725 | 2020.28 | + | 1.35 | 1.06E-61 |
| regulation of metabolic process (GO:0019222)                              | 5499 | 2908 | 2157.19 | + | 1.35 | 3.36E-67 |
| regulation of cellular metabolic process (GO:0031323)                     | 5218 | 2759 | 2046.96 | + | 1.35 | 1.83E-62 |

|                                                                             |      |      |         |   |      |          |
|-----------------------------------------------------------------------------|------|------|---------|---|------|----------|
| cell cycle (GO:0007049)                                                     | 760  | 401  | 298.14  | + | 1.35 | 3.85E-05 |
| macromolecular complex assembly (GO:0065003)                                | 1206 | 635  | 473.10  | + | 1.34 | 1.55E-09 |
| regulation of nucleobase-containing compound metabolic process (GO:0019219) | 3481 | 1829 | 1365.55 | + | 1.34 | 4.41E-35 |
| macromolecular complex subunit organization (GO:0043933)                    | 1743 | 915  | 683.76  | + | 1.34 | 8.36E-15 |
| regulation of nitrogen compound metabolic process (GO:0051171)              | 3740 | 1963 | 1467.16 | + | 1.34 | 4.31E-38 |
| developmental process involved in reproduction (GO:0003006)                 | 733  | 384  | 287.55  | + | 1.34 | 1.70E-04 |
| hematopoietic or lymphoid organ development (GO:0048534)                    | 638  | 334  | 250.28  | + | 1.33 | 1.48E-03 |
| regulation of nucleic acid-templated transcription (GO:1903506)             | 3003 | 1572 | 1178.04 | + | 1.33 | 2.67E-28 |
| regulation of transcription, DNA-templated (GO:0006355)                     | 2977 | 1558 | 1167.84 | + | 1.33 | 6.15E-28 |
| regulation of RNA biosynthetic process (GO:2001141)                         | 3010 | 1575 | 1180.79 | + | 1.33 | 2.77E-28 |
| regulation of RNA metabolic process (GO:0051252)                            | 3133 | 1637 | 1229.04 | + | 1.33 | 2.22E-29 |
| regulation of gene expression (GO:0010468)                                  | 3647 | 1904 | 1430.67 | + | 1.33 | 2.48E-35 |
| regulation of cellular macromolecule biosynthetic process (GO:2000112)      | 3355 | 1748 | 1316.13 | + | 1.33 | 2.87E-31 |
| response to cytokine (GO:0034097)                                           | 668  | 348  | 262.05  | + | 1.33 | 1.29E-03 |
| regulation of macromolecule biosynthetic process (GO:0010556)               | 3463 | 1803 | 1358.49 | + | 1.33 | 2.36E-32 |
| cellular protein metabolic process (GO:0044267)                             | 3251 | 1692 | 1275.33 | + | 1.33 | 8.68E-30 |
| cellular component biogenesis (GO:0044085)                                  | 2108 | 1097 | 826.94  | + | 1.33 | 2.24E-17 |
| cell cycle process (GO:0022402)                                             | 723  | 376  | 283.62  | + | 1.33 | 4.92E-04 |
| response to stress (GO:0006950)                                             | 2989 | 1554 | 1172.55 | + | 1.33 | 1.40E-26 |
| regulation of cellular biosynthetic process (GO:0031326)                    | 3632 | 1887 | 1424.79 | + | 1.32 | 9.04E-34 |
| regulation of biosynthetic process (GO:0009889)                             | 3696 | 1919 | 1449.90 | + | 1.32 | 2.42E-34 |
| RNA metabolic process (GO:0016070)                                          | 2014 | 1044 | 790.07  | + | 1.32 | 7.32E-16 |
| cellular metabolic process (GO:0044237)                                     | 7028 | 3639 | 2757.00 | + | 1.32 | 5.61E-81 |
| chromatin organization (GO:0006325)                                         | 564  | 292  | 221.25  | + | 1.32 | 1.98E-02 |
| cellular response to DNA damage stimulus (GO:0006974)                       | 582  | 300  | 228.31  | + | 1.31 | 2.04E-02 |
| cellular macromolecule metabolic process (GO:0044260)                       | 5345 | 2752 | 2096.78 | + | 1.31 | 4.39E-52 |
| cellular aromatic compound metabolic process (GO:0006725)                   | 3120 | 1601 | 1223.94 | + | 1.31 | 4.73E-25 |
| carboxylic acid metabolic process (GO:0019752)                              | 689  | 353  | 270.29  | + | 1.31 | 4.76E-03 |
| organic acid metabolic process (GO:0006082)                                 | 771  | 395  | 302.45  | + | 1.31 | 1.04E-03 |
| oxoacid metabolic process (GO:0043436)                                      | 693  | 355  | 271.86  | + | 1.31 | 4.48E-03 |
| organic cyclic compound metabolic process (GO:1901360)                      | 3285 | 1682 | 1288.67 | + | 1.31 | 3.15E-26 |
| immune system development (GO:0002520)                                      | 672  | 344  | 263.62  | + | 1.30 | 7.09E-03 |
| heterocycle metabolic process (GO:0046483)                                  | 3061 | 1565 | 1200.79 | + | 1.30 | 1.13E-23 |
| biosynthetic process (GO:0009058)                                           | 3255 | 1664 | 1276.90 | + | 1.30 | 1.46E-25 |
| nucleobase-containing compound metabolic process (GO:0006139)               | 2943 | 1502 | 1154.50 | + | 1.30 | 3.63E-22 |
| organic substance biosynthetic process (GO:1901576)                         | 3177 | 1620 | 1246.30 | + | 1.30 | 3.17E-24 |
| cellular biosynthetic process (GO:0044249)                                  | 3109 | 1583 | 1219.62 | + | 1.30 | 2.94E-23 |

|                                                              |       |      |         |   |      |           |
|--------------------------------------------------------------|-------|------|---------|---|------|-----------|
| regulation of proteolysis (GO:0030162)                       | 656   | 332  | 257.34  | + | 1.29 | 2.76E-02  |
| reproductive process (GO:0022414)                            | 1402  | 709  | 549.99  | + | 1.29 | 8.93E-08  |
| reproduction (GO:0000003)                                    | 1405  | 710  | 551.16  | + | 1.29 | 9.78E-08  |
| nucleic acid metabolic process (GO:0090304)                  | 2470  | 1248 | 968.95  | + | 1.29 | 3.70E-16  |
| regulation of response to external stimulus (GO:0032101)     | 735   | 371  | 288.33  | + | 1.29 | 9.56E-03  |
| organic substance metabolic process (GO:0071704)             | 7647  | 3859 | 2999.83 | + | 1.29 | 6.37E-74  |
| primary metabolic process (GO:0044238)                       | 7212  | 3629 | 2829.18 | + | 1.28 | 1.00E-65  |
| metabolic process (GO:0008152)                               | 8072  | 4019 | 3166.55 | + | 1.27 | 3.72E-71  |
| macromolecule metabolic process (GO:0043170)                 | 6052  | 3006 | 2374.13 | + | 1.27 | 7.84E-45  |
| macromolecule biosynthetic process (GO:0009059)              | 2384  | 1181 | 935.21  | + | 1.26 | 1.32E-12  |
| cellular macromolecule biosynthetic process (GO:0034645)     | 2357  | 1167 | 924.62  | + | 1.26 | 2.40E-12  |
| protein metabolic process (GO:0019538)                       | 3867  | 1903 | 1516.98 | + | 1.25 | 4.00E-22  |
| single organism reproductive process (GO:0044702)            | 1261  | 620  | 494.68  | + | 1.25 | 1.06E-04  |
| nitrogen compound metabolic process (GO:0006807)             | 4129  | 2018 | 1619.76 | + | 1.25 | 1.91E-22  |
| single-organism cellular process (GO:0044763)                | 10837 | 5219 | 4251.22 | + | 1.23 | 7.15E-86  |
| single-organism process (GO:0044699)                         | 12411 | 5950 | 4868.69 | + | 1.22 | 2.64E-109 |
| biological regulation (GO:0065007)                           | 11690 | 5601 | 4585.85 | + | 1.22 | 5.99E-95  |
| multi-organism process (GO:0051704)                          | 1944  | 930  | 762.61  | + | 1.22 | 3.83E-06  |
| cellular nitrogen compound metabolic process (GO:0034641)    | 3794  | 1814 | 1488.34 | + | 1.22 | 1.46E-15  |
| cellular nitrogen compound biosynthetic process (GO:0044271) | 2277  | 1083 | 893.24  | + | 1.21 | 3.99E-07  |
| regulation of biological process (GO:0050789)                | 11093 | 5274 | 4351.65 | + | 1.21 | 8.62E-78  |
| regulation of cellular process (GO:0050794)                  | 10637 | 5047 | 4172.77 | + | 1.21 | 7.99E-70  |
| cellular process (GO:0009987)                                | 14095 | 6673 | 5529.30 | + | 1.21 | 2.86E-130 |
| multicellular organismal process (GO:0032501)                | 7149  | 3384 | 2804.47 | + | 1.21 | 3.57E-34  |
| gene expression (GO:0010467)                                 | 2601  | 1210 | 1020.34 | + | 1.19 | 3.79E-06  |
| biological_process (GO:0008150)                              | 17404 | 8026 | 6827.38 | + | 1.18 | 3.68E-193 |
| response to stimulus (GO:0050896)                            | 8233  | 3757 | 3229.71 | + | 1.16 | 3.58E-26  |
| cellular response to stimulus (GO:0051716)                   | 6618  | 2966 | 2596.16 | + | 1.14 | 1.55E-13  |
| cell communication (GO:0007154)                              | 5491  | 2438 | 2154.05 | + | 1.13 | 2.70E-08  |
| signaling (GO:0023052)                                       | 5365  | 2362 | 2104.62 | + | 1.12 | 1.40E-06  |
| single organism signaling (GO:0044700)                       | 5362  | 2360 | 2103.45 | + | 1.12 | 1.58E-06  |
| response to chemical (GO:0042221)                            | 4894  | 2154 | 1919.86 | + | 1.12 | 1.48E-05  |
| signal transduction (GO:0007165)                             | 5098  | 2183 | 1999.88 | + | 1.09 | 2.09E-02  |
| system process (GO:0003008)                                  | 2700  | 920  | 1059.18 | - | .87  | 1.62E-02  |
| neurological system process (GO:0050877)                     | 2229  | 661  | 874.41  | - | .76  | 1.49E-11  |
| peptide biosynthetic process (GO:0043043)                    | 693   | 198  | 271.86  | - | .73  | 9.26E-03  |
| translation (GO:0006412)                                     | 675   | 190  | 264.79  | - | .72  | 4.77E-03  |

|                                                                                     |      |      |         |   |       |          |
|-------------------------------------------------------------------------------------|------|------|---------|---|-------|----------|
| G-protein coupled receptor signaling pathway (GO:0007186)                           | 2278 | 535  | 893.63  | - | .60   | 5.19E-38 |
| sensory perception (GO:0007600)                                                     | 1865 | 403  | 731.62  | - | .55   | 3.21E-39 |
| Unclassified (UNCLASSIFIED)                                                         | 6377 | 1303 | 2501.62 | - | .52   | 0.00E00  |
| production of molecular mediator of immune response (GO:0002440)                    | 144  | 25   | 56.49   | - | .44   | 1.62E-02 |
| immunoglobulin production (GO:0002377)                                              | 127  | 21   | 49.82   | - | .42   | 2.64E-02 |
| detection of stimulus (GO:0051606)                                                  | 1605 | 264  | 629.62  | - | .42   | 1.28E-60 |
| detection of stimulus involved in sensory perception (GO:0050906)                   | 1509 | 216  | 591.96  | - | .36   | 2.34E-70 |
| sensory perception of chemical stimulus (GO:0007606)                                | 1510 | 209  | 592.35  | - | .35   | 1.02E-73 |
| detection of chemical stimulus (GO:0009593)                                         | 1477 | 197  | 579.41  | - | .34   | 1.53E-75 |
| sensory perception of smell (GO:0007608)                                            | 1427 | 188  | 559.79  | - | .34   | 6.21E-74 |
| protein activation cascade (GO:0072376)                                             | 104  | 13   | 40.80   | - | .32   | 3.02E-03 |
| detection of chemical stimulus involved in sensory perception (GO:0050907)          | 1445 | 177  | 566.86  | - | .31   | 9.92E-82 |
| detection of chemical stimulus involved in sensory perception of smell (GO:0050911) | 1389 | 167  | 544.89  | - | .31   | 5.38E-80 |
| complement activation (GO:0006956)                                                  | 93   | 10   | 36.48   | - | .27   | 1.76E-03 |
| humoral immune response mediated by circulating immunoglobulin (GO:0002455)         | 84   | 7    | 32.95   | - | .21   | 4.06E-04 |
| complement activation, classical pathway (GO:0006958)                               | 79   | 5    | 30.99   | - | < 0.2 | 7.73E-05 |
