# Supplementary material for: The RNA-Binding Protein hnRNP K Mediates the Effect of BDNF on Dendritic mRNA Metabolism and Regulates Synaptic NMDA Receptors in Hippocampal Neurons
Source: PubMed Central journal article supplement (PMC5732018; doi:10.1523/eneuro.0268-17.2017), 2017-12-12
Supplement: sup_enu-eN-NWR-0268-17-s06.pdf [file sup_enu-eN-NWR-0268-17-s06.pdf]

**Table 1-3 - Cellular components associated with mRNAs co-immunoprecipitated with hnRNP K as assessed by Gene Ontology**

| GO Cellular component                                | Rattus norvegicus<br>(reference list) | uploaded<br>list | (expected) | (over/under) | (fold enrichment) | (P-value) |
|------------------------------------------------------|---------------------------------------|------------------|------------|--------------|-------------------|-----------|
| presynaptic active zone (GO:0048786)                 | 28                                    | 27               | 10.98      | +            | 2.46              | 3.90E-02  |
| neuron projection membrane (GO:0032589)              | 49                                    | 44               | 19.22      | +            | 2.29              | 1.07E-03  |
| dendritic shaft (GO:0043198)                         | 58                                    | 52               | 22.75      | +            | 2.29              | 1.23E-04  |
| exocytic vesicle membrane (GO:0099501)               | 62                                    | 55               | 24.32      | +            | 2.26              | 7.55E-05  |
| synaptic vesicle membrane (GO:0030672)               | 62                                    | 55               | 24.32      | +            | 2.26              | 7.55E-05  |
| neurotransmitter receptor complex (GO:0098878)       | 50                                    | 43               | 19.61      | +            | 2.19              | 4.10E-03  |
| ionotropic glutamate receptor complex (GO:0008328)   | 50                                    | 43               | 19.61      | +            | 2.19              | 4.10E-03  |
| T-tubule (GO:0030315)                                | 60                                    | 51               | 23.54      | +            | 2.17              | 7.57E-04  |
| presynaptic membrane (GO:0042734)                    | 74                                    | 62               | 29.03      | +            | 2.14              | 8.37E-05  |
| neuron spine (GO:0044309)                            | 155                                   | 129              | 60.80      | +            | 2.12              | 1.90E-11  |
| dendritic spine (GO:0043197)                         | 153                                   | 127              | 60.02      | +            | 2.12              | 3.62E-11  |
| excitatory synapse (GO:0060076)                      | 255                                   | 211              | 100.03     | +            | 2.11              | 2.07E-19  |
| postsynaptic density (GO:0014069)                    | 235                                   | 194              | 92.19      | +            | 2.10              | 1.29E-17  |
| postsynaptic specialization (GO:0099572)             | 235                                   | 194              | 92.19      | +            | 2.10              | 1.29E-17  |
| main axon (GO:0044304)                               | 74                                    | 61               | 29.03      | +            | 2.10              | 1.82E-04  |
| terminal bouton (GO:0043195)                         | 111                                   | 90               | 43.54      | +            | 2.07              | 5.53E-07  |
| synaptic vesicle (GO:0008021)                        | 154                                   | 124              | 60.41      | +            | 2.05              | 5.34E-10  |
| voltage-gated potassium channel complex (GO:0008076) | 76                                    | 61               | 29.81      | +            | 2.05              | 4.33E-04  |
| presynapse (GO:0098793)                              | 330                                   | 263              | 129.46     | +            | 2.03              | 2.45E-22  |
| clathrin-coated pit (GO:0005905)                     | 54                                    | 43               | 21.18      | +            | 2.03              | 2.49E-02  |
| potassium channel complex (GO:0034705)               | 78                                    | 62               | 30.60      | +            | 2.03              | 4.79E-04  |
| postsynapse (GO:0098794)                             | 428                                   | 340              | 167.90     | +            | 2.03              | 3.73E-29  |
| postsynaptic membrane (GO:0045211)                   | 197                                   | 156              | 77.28      | +            | 2.02              | 2.20E-12  |
| exocytic vesicle (GO:0070382)                        | 170                                   | 134              | 66.69      | +            | 2.01              | 2.76E-10  |
| neuromuscular junction (GO:0031594)                  | 61                                    | 48               | 23.93      | +            | 2.01              | 1.17E-02  |
| synaptic membrane (GO:0097060)                       | 267                                   | 210              | 104.74     | +            | 2.00              | 6.90E-17  |
| synapse part (GO:0044456)                            | 677                                   | 532              | 265.58     | +            | 2.00              | 1.27E-45  |
| dendrite (GO:0030425)                                | 581                                   | 452              | 227.92     | +            | 1.98              | 2.36E-37  |
| synapse (GO:0045202)                                 | 842                                   | 653              | 330.31     | +            | 1.98              | 8.07E-55  |
| transport vesicle membrane (GO:0030658)              | 117                                   | 90               | 45.90      | +            | 1.96              | 6.37E-06  |
| axon part (GO:0033267)                               | 307                                   | 236              | 120.43     | +            | 1.96              | 5.45E-18  |
| sarcolemma (GO:0042383)                              | 150                                   | 115              | 58.84      | +            | 1.95              | 6.56E-08  |
| clathrin-coated vesicle (GO:0030136)                 | 97                                    | 74               | 38.05      | +            | 1.94              | 1.85E-04  |

|                                           |      |      |        |   |      |          |
|-------------------------------------------|------|------|--------|---|------|----------|
| neuron projection terminus (GO:0044306)   | 198  | 151  | 77.67  | + | 1.94 | 1.09E-10 |
| axon terminus (GO:0043679)                | 185  | 141  | 72.57  | + | 1.94 | 7.31E-10 |
| leading edge membrane (GO:0031256)        | 133  | 100  | 52.17  | + | 1.92 | 2.93E-06 |
| axon (GO:0030424)                         | 550  | 412  | 215.76 | + | 1.91 | 1.84E-30 |
| transport vesicle (GO:0030133)            | 292  | 217  | 114.55 | + | 1.89 | 7.62E-15 |
| plasma membrane raft (GO:0044853)         | 101  | 75   | 39.62  | + | 1.89 | 4.17E-04 |
| caveola (GO:0005901)                      | 92   | 68   | 36.09  | + | 1.88 | 1.65E-03 |
| Golgi-associated vesicle (GO:0005798)     | 69   | 51   | 27.07  | + | 1.88 | 3.16E-02 |
| neuron projection (GO:0043005)            | 1165 | 861  | 457.02 | + | 1.88 | 1.28E-64 |
| growth cone (GO:0030426)                  | 171  | 126  | 67.08  | + | 1.88 | 9.50E-08 |
| filopodium (GO:0030175)                   | 91   | 67   | 35.70  | + | 1.88 | 2.23E-03 |
| somatodendritic compartment (GO:0036477)  | 865  | 635  | 339.33 | + | 1.87 | 1.20E-45 |
| site of polarized growth (GO:0030427)     | 176  | 129  | 69.04  | + | 1.87 | 7.91E-08 |
| membrane region (GO:0098589)              | 396  | 290  | 155.35 | + | 1.87 | 1.67E-19 |
| cytoplasmic vesicle membrane (GO:0030659) | 283  | 206  | 111.02 | + | 1.86 | 3.97E-13 |
| cell-cell contact zone (GO:0044291)       | 73   | 53   | 28.64  | + | 1.85 | 3.53E-02 |
| Golgi membrane (GO:0000139)               | 390  | 283  | 152.99 | + | 1.85 | 1.85E-18 |
| membrane microdomain (GO:0098857)         | 337  | 243  | 132.20 | + | 1.84 | 2.65E-15 |
| membrane raft (GO:0045121)                | 337  | 243  | 132.20 | + | 1.84 | 2.65E-15 |
| endosome membrane (GO:0010008)            | 240  | 173  | 94.15  | + | 1.84 | 1.98E-10 |
| cytoplasmic vesicle part (GO:0044433)     | 305  | 219  | 119.65 | + | 1.83 | 1.91E-13 |
| coated vesicle (GO:0030135)               | 152  | 109  | 59.63  | + | 1.83 | 6.89E-06 |
| neuron part (GO:0097458)                  | 1518 | 1088 | 595.49 | + | 1.83 | 3.00E-76 |
| vesicle membrane (GO:0012506)             | 311  | 222  | 122.00 | + | 1.82 | 2.17E-13 |
| cell leading edge (GO:0031252)            | 349  | 249  | 136.91 | + | 1.82 | 3.45E-15 |
| neuronal cell body (GO:0043025)           | 623  | 441  | 244.40 | + | 1.80 | 1.33E-27 |
| endocytic vesicle (GO:0030139)            | 128  | 90   | 50.21  | + | 1.79 | 3.11E-04 |
| Golgi apparatus part (GO:0044431)         | 577  | 405  | 226.35 | + | 1.79 | 1.70E-24 |
| endosomal part (GO:0044440)               | 258  | 181  | 101.21 | + | 1.79 | 5.27E-10 |
| cell body (GO:0044297)                    | 700  | 491  | 274.60 | + | 1.79 | 4.28E-30 |
| ruffle (GO:0001726)                       | 145  | 101  | 56.88  | + | 1.78 | 9.34E-05 |
| trans-Golgi network (GO:0005802)          | 158  | 110  | 61.98  | + | 1.77 | 2.62E-05 |
| vacuolar membrane (GO:0005774)            | 421  | 293  | 165.15 | + | 1.77 | 9.97E-17 |
| ion channel complex (GO:0034702)          | 262  | 182  | 102.78 | + | 1.77 | 1.02E-09 |
| whole membrane (GO:0098805)               | 1122 | 776  | 440.15 | + | 1.76 | 3.77E-47 |
| lamellipodium (GO:0030027)                | 162  | 112  | 63.55  | + | 1.76 | 2.79E-05 |
| early endosome (GO:0005769)               | 246  | 170  | 96.50  | + | 1.76 | 8.37E-09 |

|                                                        |      |      |        |   |      |          |
|--------------------------------------------------------|------|------|--------|---|------|----------|
| cation channel complex (GO:0034703)                    | 155  | 107  | 60.80  | + | 1.76 | 6.05E-05 |
| late endosome (GO:0005770)                             | 177  | 122  | 69.43  | + | 1.76 | 8.06E-06 |
| vacuolar part (GO:0044437)                             | 441  | 301  | 173.00 | + | 1.74 | 4.20E-16 |
| bounding membrane of organelle (GO:0098588)            | 1191 | 805  | 467.21 | + | 1.72 | 1.89E-45 |
| transmembrane transporter complex (GO:1902495)         | 289  | 194  | 113.37 | + | 1.71 | 3.36E-09 |
| transporter complex (GO:1990351)                       | 293  | 196  | 114.94 | + | 1.71 | 3.49E-09 |
| endosome (GO:0005768)                                  | 642  | 429  | 251.85 | + | 1.70 | 5.04E-22 |
| lytic vacuole membrane (GO:0098852)                    | 213  | 142  | 83.56  | + | 1.70 | 3.90E-06 |
| lysosomal membrane (GO:0005765)                        | 213  | 142  | 83.56  | + | 1.70 | 3.90E-06 |
| organelle subcompartment (GO:0031984)                  | 258  | 172  | 101.21 | + | 1.70 | 9.25E-08 |
| perinuclear region of cytoplasm (GO:0048471)           | 637  | 424  | 249.89 | + | 1.70 | 1.95E-21 |
| cell projection membrane (GO:0031253)                  | 263  | 175  | 103.17 | + | 1.70 | 7.33E-08 |
| Golgi subcompartment (GO:0098791)                      | 245  | 163  | 96.11  | + | 1.70 | 3.27E-07 |
| focal adhesion (GO:0005925)                            | 390  | 259  | 152.99 | + | 1.69 | 2.66E-12 |
| Golgi apparatus (GO:0005794)                           | 1165 | 771  | 457.02 | + | 1.69 | 2.78E-40 |
| cell-substrate adherens junction (GO:0005924)          | 395  | 261  | 154.95 | + | 1.68 | 3.61E-12 |
| plasma membrane region (GO:0098590)                    | 920  | 606  | 360.90 | + | 1.68 | 1.85E-30 |
| cell projection part (GO:0044463)                      | 1015 | 668  | 398.17 | + | 1.68 | 9.20E-34 |
| cell-substrate junction (GO:0030055)                   | 400  | 263  | 156.92 | + | 1.68 | 4.87E-12 |
| adherens junction (GO:0005912)                         | 470  | 308  | 184.38 | + | 1.67 | 3.37E-14 |
| vacuole (GO:0005773)                                   | 979  | 641  | 384.05 | + | 1.67 | 1.13E-31 |
| myelin sheath (GO:0043209)                             | 208  | 136  | 81.60  | + | 1.67 | 2.49E-05 |
| cell junction (GO:0030054)                             | 1122 | 732  | 440.15 | + | 1.66 | 3.92E-36 |
| cell projection (GO:0042995)                           | 1921 | 1247 | 753.59 | + | 1.65 | 6.05E-64 |
| anchoring junction (GO:0070161)                        | 485  | 313  | 190.26 | + | 1.65 | 1.33E-13 |
| mitochondrial outer membrane (GO:0005741)              | 138  | 88   | 54.14  | + | 1.63 | 1.70E-02 |
| plasma membrane protein complex (GO:0098797)           | 476  | 302  | 186.73 | + | 1.62 | 3.58E-12 |
| organelle outer membrane (GO:0031968)                  | 158  | 100  | 61.98  | + | 1.61 | 6.32E-03 |
| cytoplasmic, membrane-bounded vesicle (GO:0016023)     | 925  | 585  | 362.87 | + | 1.61 | 4.54E-25 |
| microbody (GO:0042579)                                 | 136  | 86   | 53.35  | + | 1.61 | 2.82E-02 |
| peroxisome (GO:0005777)                                | 136  | 86   | 53.35  | + | 1.61 | 2.82E-02 |
| extrinsic component of plasma membrane (GO:0019897)    | 146  | 92   | 57.27  | + | 1.61 | 1.71E-02 |
| intrinsic component of organelle membrane (GO:0031300) | 143  | 90   | 56.10  | + | 1.60 | 2.20E-02 |
| extrinsic component of membrane (GO:0019898)           | 260  | 163  | 101.99 | + | 1.60 | 1.66E-05 |
| outer membrane (GO:0019867)                            | 163  | 102  | 63.94  | + | 1.60 | 8.09E-03 |
| basolateral plasma membrane (GO:0016323)               | 232  | 145  | 91.01  | + | 1.59 | 1.20E-04 |
| cytoplasmic region (GO:0099568)                        | 298  | 186  | 116.90 | + | 1.59 | 2.29E-06 |

|                                                                             |      |      |         |   |      |          |
|-----------------------------------------------------------------------------|------|------|---------|---|------|----------|
| perikaryon (GO:0043204)                                                     | 141  | 88   | 55.31   | + | 1.59 | 3.60E-02 |
| cytoplasmic side of plasma membrane (GO:0009898)                            | 164  | 102  | 64.34   | + | 1.59 | 1.03E-02 |
| integral component of organelle membrane (GO:0031301)                       | 140  | 87   | 54.92   | + | 1.58 | 4.61E-02 |
| cytoplasmic vesicle (GO:0031410)                                            | 1035 | 643  | 406.02  | + | 1.58 | 7.46E-26 |
| intracellular vesicle (GO:0097708)                                          | 1037 | 643  | 406.80  | + | 1.58 | 1.21E-25 |
| lytic vacuole (GO:0000323)                                                  | 429  | 266  | 168.29  | + | 1.58 | 1.70E-09 |
| lysosome (GO:0005764)                                                       | 429  | 266  | 168.29  | + | 1.58 | 1.70E-09 |
| cytoplasmic side of membrane (GO:0098562)                                   | 176  | 108  | 69.04   | + | 1.56 | 1.00E-02 |
| endoplasmic reticulum membrane (GO:0005789)                                 | 686  | 420  | 269.11  | + | 1.56 | 4.05E-15 |
| endomembrane system (GO:0012505)                                            | 3241 | 1982 | 1271.41 | + | 1.56 | 7.78E-87 |
| nuclear outer membrane-endoplasmic reticulum membrane network (GO:0042175)  | 703  | 429  | 275.78  | + | 1.56 | 2.96E-15 |
| endoplasmic reticulum part (GO:0044432)                                     | 772  | 471  | 302.85  | + | 1.56 | 6.37E-17 |
| plasma membrane receptor complex (GO:0098802)                               | 164  | 100  | 64.34   | + | 1.55 | 2.67E-02 |
| endoplasmic reticulum (GO:0005783)                                          | 1355 | 824  | 531.55  | + | 1.55 | 4.76E-31 |
| actin-based cell projection (GO:0098858)                                    | 191  | 116  | 74.93   | + | 1.55 | 7.48E-03 |
| organelle membrane (GO:0031090)                                             | 1949 | 1183 | 764.57  | + | 1.55 | 3.55E-46 |
| secretory vesicle (GO:0099503)                                              | 449  | 269  | 176.14  | + | 1.53 | 3.86E-08 |
| actin cytoskeleton (GO:0015629)                                             | 430  | 257  | 168.68  | + | 1.52 | 1.31E-07 |
| contractile fiber part (GO:0044449)                                         | 191  | 114  | 74.93   | + | 1.52 | 1.85E-02 |
| microtubule (GO:0005874)                                                    | 322  | 192  | 126.32  | + | 1.52 | 3.28E-05 |
| cell cortex (GO:0005938)                                                    | 239  | 142  | 93.76   | + | 1.51 | 2.33E-03 |
| contractile fiber (GO:0043292)                                              | 214  | 127  | 83.95   | + | 1.51 | 8.20E-03 |
| sarcomere (GO:0030017)                                                      | 177  | 105  | 69.43   | + | 1.51 | 4.89E-02 |
| myofibril (GO:0030016)                                                      | 204  | 121  | 80.03   | + | 1.51 | 1.36E-02 |
| receptor complex (GO:0043235)                                               | 320  | 188  | 125.53  | + | 1.50 | 1.21E-04 |
| transferase complex, transferring phosphorus-containing groups (GO:0061695) | 239  | 139  | 93.76   | + | 1.48 | 8.35E-03 |
| ubiquitin ligase complex (GO:0000151)                                       | 273  | 158  | 107.09  | + | 1.48 | 2.70E-03 |
| transcription factor complex (GO:0005667)                                   | 313  | 181  | 122.79  | + | 1.47 | 5.50E-04 |
| nucleoplasm (GO:0005654)                                                    | 2113 | 1216 | 828.90  | + | 1.47 | 3.06E-37 |
| nuclear body (GO:0016604)                                                   | 287  | 164  | 112.59  | + | 1.46 | 3.53E-03 |
| membrane protein complex (GO:0098796)                                       | 1031 | 586  | 404.45  | + | 1.45 | 3.04E-15 |
| transferase complex (GO:1990234)                                            | 701  | 398  | 274.99  | + | 1.45 | 1.11E-09 |
| intrinsic component of plasma membrane (GO:0031226)                         | 1162 | 655  | 455.84  | + | 1.44 | 1.56E-16 |
| plasma membrane part (GO:0044459)                                           | 2252 | 1269 | 883.43  | + | 1.44 | 4.13E-35 |
| cell-cell junction (GO:0005911)                                             | 407  | 229  | 159.66  | + | 1.43 | 1.41E-04 |
| integral component of plasma membrane (GO:0005887)                          | 1094 | 615  | 429.16  | + | 1.43 | 3.74E-15 |
| vesicle (GO:0031982)                                                        | 3401 | 1904 | 1334.17 | + | 1.43 | 8.19E-55 |

|                                                       |       |      |         |   |      |           |
|-------------------------------------------------------|-------|------|---------|---|------|-----------|
| membrane-bounded vesicle (GO:0031988)                 | 3254  | 1820 | 1276.51 | + | 1.43 | 1.22E-51  |
| nuclear envelope (GO:0005635)                         | 384   | 214  | 150.64  | + | 1.42 | 6.81E-04  |
| apical plasma membrane (GO:0016324)                   | 309   | 170  | 121.22  | + | 1.40 | 1.82E-02  |
| cytoplasmic part (GO:0044444)                         | 6819  | 3737 | 2675.01 | + | 1.40 | 1.24E-119 |
| nucleoplasm part (GO:0044451)                         | 668   | 366  | 262.05  | + | 1.40 | 5.31E-07  |
| extracellular vesicle (GO:1903561)                    | 2610  | 1430 | 1023.87 | + | 1.40 | 1.45E-34  |
| extracellular organelle (GO:0043230)                  | 2617  | 1433 | 1026.62 | + | 1.40 | 1.56E-34  |
| extracellular exosome (GO:0070062)                    | 2596  | 1419 | 1018.38 | + | 1.39 | 8.64E-34  |
| cytoplasm (GO:0005737)                                | 9562  | 5217 | 3751.06 | + | 1.39 | 2.70E-202 |
| nuclear chromatin (GO:0000790)                        | 310   | 169  | 121.61  | + | 1.39 | 3.06E-02  |
| apical part of cell (GO:0045177)                      | 408   | 222  | 160.05  | + | 1.39 | 2.12E-03  |
| cytosol (GO:0005829)                                  | 1984  | 1079 | 778.30  | + | 1.39 | 8.02E-24  |
| catalytic complex (GO:1902494)                        | 1058  | 575  | 415.04  | + | 1.39 | 1.96E-11  |
| nuclear part (GO:0044428)                             | 3385  | 1837 | 1327.89 | + | 1.38 | 3.94E-44  |
| nuclear lumen (GO:0031981)                            | 2921  | 1584 | 1145.87 | + | 1.38 | 9.62E-37  |
| intracellular membrane-bounded organelle (GO:0043231) | 9568  | 5184 | 3753.41 | + | 1.38 | 1.22E-192 |
| intracellular organelle lumen (GO:0070013)            | 3296  | 1782 | 1292.98 | + | 1.38 | 1.35E-41  |
| organelle lumen (GO:0043233)                          | 3301  | 1784 | 1294.94 | + | 1.38 | 1.48E-41  |
| membrane-enclosed lumen (GO:0031974)                  | 3301  | 1784 | 1294.94 | + | 1.38 | 1.48E-41  |
| polymeric cytoskeletal fiber (GO:0099513)             | 560   | 301  | 219.68  | + | 1.37 | 9.92E-05  |
| supramolecular fiber (GO:0099512)                     | 560   | 301  | 219.68  | + | 1.37 | 9.92E-05  |
| protein complex (GO:0043234)                          | 4040  | 2170 | 1584.84 | + | 1.37 | 5.02E-51  |
| membrane-bounded organelle (GO:0043227)               | 10720 | 5757 | 4205.33 | + | 1.37 | 5.27E-225 |
| cytoskeleton (GO:0005856)                             | 1760  | 944  | 690.43  | + | 1.37 | 1.02E-18  |
| intracellular organelle part (GO:0044446)             | 6833  | 3647 | 2680.50 | + | 1.36 | 2.59E-99  |
| organelle part (GO:0044422)                           | 7014  | 3737 | 2751.51 | + | 1.36 | 6.32E-102 |
| organelle envelope (GO:0031967)                       | 974   | 515  | 382.09  | + | 1.35 | 2.74E-08  |
| envelope (GO:0031975)                                 | 981   | 518  | 384.83  | + | 1.35 | 2.90E-08  |
| microtubule cytoskeleton (GO:0015630)                 | 1010  | 533  | 396.21  | + | 1.35 | 1.61E-08  |
| mitochondrion (GO:0005739)                            | 1740  | 915  | 682.58  | + | 1.34 | 8.19E-16  |
| nucleus (GO:0005634)                                  | 6007  | 3155 | 2356.47 | + | 1.34 | 6.05E-73  |
| intracellular part (GO:0044424)                       | 12356 | 6477 | 4847.11 | + | 1.34 | 6.48E-255 |
| chromatin (GO:0000785)                                | 479   | 251  | 187.91  | + | 1.34 | 6.62E-03  |
| intracellular organelle (GO:0043229)                  | 10800 | 5656 | 4236.71 | + | 1.33 | 6.44E-188 |
| nuclear chromosome part (GO:0044454)                  | 488   | 254  | 191.44  | + | 1.33 | 9.19E-03  |
| intracellular (GO:0005622)                            | 12864 | 6689 | 5046.39 | + | 1.33 | 2.52E-263 |
| organelle (GO:0043226)                                | 11850 | 6159 | 4648.61 | + | 1.32 | 1.70E-215 |

|                                                           |       |      |         |   |       |           |
|-----------------------------------------------------------|-------|------|---------|---|-------|-----------|
| nucleolus (GO:0005730)                                    | 815   | 423  | 319.71  | + | 1.32  | 1.40E-05  |
| nuclear chromosome (GO:0000228)                           | 521   | 268  | 204.38  | + | 1.31  | 1.18E-02  |
| cytoskeletal part (GO:0044430)                            | 1358  | 698  | 532.73  | + | 1.31  | 1.17E-09  |
| mitochondrial membrane (GO:0031966)                       | 558   | 285  | 218.90  | + | 1.30  | 1.05E-02  |
| mitochondrial envelope (GO:0005740)                       | 603   | 307  | 236.55  | + | 1.30  | 6.14E-03  |
| chromosomal part (GO:0044427)                             | 790   | 402  | 309.91  | + | 1.30  | 2.40E-04  |
| mitochondrial part (GO:0044429)                           | 786   | 396  | 308.34  | + | 1.28  | 7.64E-04  |
| cell surface (GO:0009986)                                 | 838   | 421  | 328.74  | + | 1.28  | 4.52E-04  |
| macromolecular complex (GO:0032991)                       | 5064  | 2539 | 1986.55 | + | 1.28  | 5.22E-39  |
| chromosome (GO:0005694)                                   | 862   | 432  | 338.15  | + | 1.28  | 4.08E-04  |
| intracellular non-membrane-bounded organelle (GO:0043232) | 3946  | 1971 | 1547.97 | + | 1.27  | 3.25E-27  |
| non-membrane-bounded organelle (GO:0043228)               | 3946  | 1971 | 1547.97 | + | 1.27  | 3.25E-27  |
| extracellular region part (GO:0044421)                    | 3745  | 1858 | 1469.12 | + | 1.26  | 7.15E-24  |
| extracellular region (GO:0005576)                         | 4135  | 2005 | 1622.11 | + | 1.24  | 1.93E-21  |
| cell part (GO:0044464)                                    | 15800 | 7555 | 6198.15 | + | 1.22  | 3.36E-211 |
| cell (GO:0005623)                                         | 15869 | 7569 | 6225.22 | + | 1.22  | 3.38E-208 |
| membrane (GO:0016020)                                     | 9765  | 4560 | 3830.69 | + | 1.19  | 1.49E-49  |
| cell periphery (GO:0071944)                               | 5396  | 2464 | 2116.79 | + | 1.16  | 2.33E-14  |
| cellular_component (GO:0005575)                           | 18430 | 8402 | 7229.87 | + | 1.16  | 1.73E-218 |
| plasma membrane (GO:0005886)                              | 5275  | 2400 | 2069.32 | + | 1.16  | 3.85E-13  |
| membrane part (GO:0044425)                                | 7677  | 3378 | 3011.59 | + | 1.12  | 6.32E-13  |
| cytosolic part (GO:0044445)                               | 455   | 117  | 178.49  | - | .66   | 5.95E-04  |
| ribosome (GO:0005840)                                     | 537   | 129  | 210.66  | - | .61   | 7.82E-07  |
| large ribosomal subunit (GO:0015934)                      | 260   | 61   | 101.99  | - | .60   | 9.05E-03  |
| ribosomal subunit (GO:0044391)                            | 402   | 89   | 157.70  | - | .56   | 1.72E-06  |
| cytosolic large ribosomal subunit (GO:0022625)            | 224   | 44   | 87.87   | - | .50   | 1.92E-04  |
| small ribosomal subunit (GO:0015935)                      | 143   | 28   | 56.10   | - | .50   | 3.05E-02  |
| cytosolic ribosome (GO:0022626)                           | 341   | 66   | 133.77  | - | .49   | 6.05E-08  |
| Unclassified (UNCLASSIFIED)                               | 5351  | 927  | 2099.13 | - | .44   | 0.00E00   |
| cytosolic small ribosomal subunit (GO:0022627)            | 109   | 17   | 42.76   | - | .40   | 7.84E-03  |
| immunoglobulin complex (GO:0019814)                       | 64    | 3    | 25.11   | - | < 0.2 | 4.49E-05  |
