# Supplementary material for: The RNA-Binding Protein hnRNP K Mediates the Effect of BDNF on Dendritic mRNA Metabolism and Regulates Synaptic NMDA Receptors in Hippocampal Neurons
Source: PubMed Central journal article supplement (PMC5732018; doi:10.1523/eneuro.0268-17.2017), 2017-12-12
Supplement: sup_enu-eN-NWR-0268-17-s07.pdf [file sup_enu-eN-NWR-0268-17-s07.pdf]

**Table 1-4 - Molecular functions associated with mRNAs co-immunoprecipitated with hnRNP K as assessed by Gene Ontology**

| GO Molecular function                                                                      | Rattus norvegicus<br>(reference list) | uploaded<br>list | (expected) | (over/under) | (fold enrichment) | (P-value) |
|--------------------------------------------------------------------------------------------|---------------------------------------|------------------|------------|--------------|-------------------|-----------|
| transmembrane receptor protein tyrosine kinase activity (GO:0004714)                       | 57                                    | 45               | 22.36      | +            | 2.01              | 4.02E-02  |
| SH3 domain binding (GO:0017124)                                                            | 94                                    | 74               | 36.88      | +            | 2.01              | 1.14E-04  |
| PDZ domain binding (GO:0030165)                                                            | 117                                   | 90               | 45.90      | +            | 1.96              | 1.28E-05  |
| amino acid transmembrane transporter activity (GO:0015171)                                 | 81                                    | 62               | 31.78      | +            | 1.95              | 3.20E-03  |
| calmodulin binding (GO:0005516)                                                            | 152                                   | 116              | 59.63      | +            | 1.95              | 1.42E-07  |
| calcium-dependent protein binding (GO:0048306)                                             | 69                                    | 52               | 27.07      | +            | 1.92              | 3.24E-02  |
| transmembrane receptor protein kinase activity (GO:0019199)                                | 73                                    | 55               | 28.64      | +            | 1.92              | 1.88E-02  |
| ion channel binding (GO:0044325)                                                           | 124                                   | 93               | 48.64      | +            | 1.91              | 2.32E-05  |
| channel regulator activity (GO:0016247)                                                    | 127                                   | 95               | 49.82      | +            | 1.91              | 1.84E-05  |
| receptor signaling protein serine/threonine kinase activity (GO:0004702)                   | 89                                    | 65               | 34.91      | +            | 1.86              | 8.13E-03  |
| beta-catenin binding (GO:0008013)                                                          | 84                                    | 61               | 32.95      | +            | 1.85              | 1.88E-02  |
| potassium ion transmembrane transporter activity (GO:0015079)                              | 142                                   | 102              | 55.70      | +            | 1.83              | 3.84E-05  |
| protein domain specific binding (GO:0019904)                                               | 690                                   | 484              | 270.68     | +            | 1.79              | 2.48E-29  |
| potassium channel activity (GO:0005267)                                                    | 117                                   | 82               | 45.90      | +            | 1.79              | 2.32E-03  |
| syntaxin binding (GO:0019905)                                                              | 95                                    | 66               | 37.27      | +            | 1.77              | 3.22E-02  |
| ubiquitin protein ligase binding (GO:0031625)                                              | 275                                   | 190              | 107.88     | +            | 1.76              | 1.04E-09  |
| receptor signaling protein activity (GO:0005057)                                           | 122                                   | 84               | 47.86      | +            | 1.76              | 3.38E-03  |
| ubiquitin-like protein ligase binding (GO:0044389)                                         | 279                                   | 192              | 109.45     | +            | 1.75              | 1.10E-09  |
| carboxylic acid transmembrane transporter activity (GO:0046943)                            | 109                                   | 75               | 42.76      | +            | 1.75              | 1.22E-02  |
| protein C-terminus binding (GO:0008022)                                                    | 210                                   | 144              | 82.38      | +            | 1.75              | 1.06E-06  |
| voltage-gated channel activity (GO:0022832)                                                | 182                                   | 124              | 71.40      | +            | 1.74              | 2.31E-05  |
| voltage-gated ion channel activity (GO:0005244)                                            | 182                                   | 124              | 71.40      | +            | 1.74              | 2.31E-05  |
| organic acid transmembrane transporter activity (GO:0005342)                               | 112                                   | 76               | 43.94      | +            | 1.73              | 1.69E-02  |
| protein N-terminus binding (GO:0047485)                                                    | 118                                   | 80               | 46.29      | +            | 1.73              | 1.02E-02  |
| phosphoprotein phosphatase activity (GO:0004721)                                           | 163                                   | 110              | 63.94      | +            | 1.72              | 2.39E-04  |
| transcription factor activity, RNA polymerase II transcription factor binding (GO:0001076) | 129                                   | 87               | 50.61      | +            | 1.72              | 4.92E-03  |
| phosphatase activity (GO:0016791)                                                          | 261                                   | 175              | 102.39     | +            | 1.71              | 8.34E-08  |
| histone deacetylase binding (GO:0042826)                                                   | 109                                   | 73               | 42.76      | +            | 1.71              | 3.84E-02  |
| SNARE binding (GO:0000149)                                                                 | 129                                   | 86               | 50.61      | +            | 1.70              | 8.62E-03  |
| phosphatase binding (GO:0019902)                                                           | 185                                   | 123              | 72.57      | +            | 1.69              | 9.66E-05  |
| voltage-gated cation channel activity (GO:0022843)                                         | 134                                   | 89               | 52.57      | +            | 1.69              | 6.82E-03  |
| kinase binding (GO:0019900)                                                                | 661                                   | 439              | 259.30     | +            | 1.69              | 8.74E-22  |
| transcription corepressor activity (GO:0003714)                                            | 154                                   | 102              | 60.41      | +            | 1.69              | 1.54E-03  |
| protein phosphatase binding (GO:0019903)                                                   | 139                                   | 92               | 54.53      | +            | 1.69              | 5.38E-03  |
| metal ion transmembrane transporter activity (GO:0046873)                                  | 397                                   | 262              | 155.74     | +            | 1.68              | 7.35E-12  |
| protein kinase binding (GO:0019901)                                                        | 594                                   | 392              | 233.02     | +            | 1.68              | 9.42E-19  |
| small GTPase binding (GO:0031267)                                                          | 276                                   | 182              | 108.27     | +            | 1.68              | 1.23E-07  |
| GTPase binding (GO:0051020)                                                                | 305                                   | 201              | 119.65     | +            | 1.68              | 1.32E-08  |

|                                                                                                                              |      |      |        |   |      |          |
|------------------------------------------------------------------------------------------------------------------------------|------|------|--------|---|------|----------|
| protein kinase regulator activity (GO:0019887)                                                                               | 161  | 106  | 63.16  | + | 1.68 | 1.23E-03 |
| kinase regulator activity (GO:0019207)                                                                                       | 181  | 119  | 71.00  | + | 1.68 | 2.78E-04 |
| phosphoric ester hydrolase activity (GO:0042578)                                                                             | 347  | 228  | 136.12 | + | 1.67 | 6.83E-10 |
| protein tyrosine kinase activity (GO:0004713)                                                                                | 128  | 84   | 50.21  | + | 1.67 | 1.94E-02 |
| nucleoside-triphosphatase regulator activity (GO:0060589)                                                                    | 247  | 160  | 96.90  | + | 1.65 | 5.62E-06 |
| magnesium ion binding (GO:0000287)                                                                                           | 204  | 132  | 80.03  | + | 1.65 | 1.41E-04 |
| Ras GTPase binding (GO:0017016)                                                                                              | 261  | 168  | 102.39 | + | 1.64 | 3.51E-06 |
| enzyme activator activity (GO:0008047)                                                                                       | 378  | 243  | 148.28 | + | 1.64 | 1.00E-09 |
| gated channel activity (GO:0022836)                                                                                          | 302  | 194  | 118.47 | + | 1.64 | 2.33E-07 |
| divalent inorganic cation transmembrane transporter activity (GO:0072509)                                                    | 161  | 103  | 63.16  | + | 1.63 | 5.96E-03 |
| GTPase regulator activity (GO:0030695)                                                                                       | 225  | 142  | 88.26  | + | 1.61 | 1.89E-04 |
| GTPase activator activity (GO:0005096)                                                                                       | 205  | 129  | 80.42  | + | 1.60 | 8.32E-04 |
| enzyme binding (GO:0019899)                                                                                                  | 1866 | 1172 | 732.01 | + | 1.60 | 2.64E-52 |
| phosphotransferase activity, alcohol group as acceptor (GO:0016773)                                                          | 707  | 444  | 277.35 | + | 1.60 | 1.16E-17 |
| ubiquitin-like protein ligase activity (GO:0061659)                                                                          | 201  | 126  | 78.85  | + | 1.60 | 1.36E-03 |
| protein kinase activity (GO:0004672)                                                                                         | 604  | 378  | 236.94 | + | 1.60 | 1.72E-14 |
| cation channel activity (GO:0005261)                                                                                         | 291  | 182  | 114.16 | + | 1.59 | 5.91E-06 |
| protein serine/threonine kinase activity (GO:0004674)                                                                        | 426  | 266  | 167.11 | + | 1.59 | 1.67E-09 |
| ubiquitin protein ligase activity (GO:0061630)                                                                               | 197  | 123  | 77.28  | + | 1.59 | 2.23E-03 |
| core promoter binding (GO:0001047)                                                                                           | 154  | 96   | 60.41  | + | 1.59 | 3.42E-02 |
| substrate-specific channel activity (GO:0022838)                                                                             | 411  | 256  | 161.23 | + | 1.59 | 5.72E-09 |
| kinase activity (GO:0016301)                                                                                                 | 806  | 501  | 316.18 | + | 1.58 | 2.30E-19 |
| ion channel activity (GO:0005216)                                                                                            | 399  | 248  | 156.52 | + | 1.58 | 1.53E-08 |
| transcription factor activity, transcription factor binding (GO:0000989)                                                     | 451  | 280  | 176.92 | + | 1.58 | 7.71E-10 |
| transcription factor activity, protein binding (GO:0000988)                                                                  | 452  | 280  | 177.31 | + | 1.58 | 9.76E-10 |
| protein homodimerization activity (GO:0042803)                                                                               | 779  | 482  | 305.59 | + | 1.58 | 3.58E-18 |
| identical protein binding (GO:0042802)                                                                                       | 1285 | 795  | 504.09 | + | 1.58 | 8.20E-32 |
| transcriptional repressor activity, RNA polymerase II transcription regulatory region sequence-specific binding (GO:0001227) | 177  | 109  | 69.43  | + | 1.57 | 1.58E-02 |
| transferase activity, transferring phosphorus-containing groups (GO:0016772)                                                 | 952  | 581  | 373.46 | + | 1.56 | 4.20E-21 |
| secondary active transmembrane transporter activity (GO:0015291)                                                             | 225  | 137  | 88.26  | + | 1.55 | 2.06E-03 |
| passive transmembrane transporter activity (GO:0022803)                                                                      | 446  | 271  | 174.96 | + | 1.55 | 1.64E-08 |
| channel activity (GO:0015267)                                                                                                | 446  | 271  | 174.96 | + | 1.55 | 1.64E-08 |
| transcription cofactor activity (GO:0003712)                                                                                 | 401  | 243  | 157.31 | + | 1.54 | 2.49E-07 |
| inorganic cation transmembrane transporter activity (GO:0022890)                                                             | 494  | 299  | 193.79 | + | 1.54 | 2.08E-09 |
| substrate-specific transmembrane transporter activity (GO:0022891)                                                           | 885  | 535  | 347.17 | + | 1.54 | 2.07E-18 |
| protein heterodimerization activity (GO:0046982)                                                                             | 541  | 327  | 212.23 | + | 1.54 | 2.10E-10 |
| ion transmembrane transporter activity (GO:0015075)                                                                          | 756  | 455  | 296.57 | + | 1.53 | 5.49E-15 |
| transcription coactivator activity (GO:0003713)                                                                              | 228  | 137  | 89.44  | + | 1.53 | 4.01E-03 |
| cytoskeletal protein binding (GO:0008092)                                                                                    | 822  | 493  | 322.46 | + | 1.53 | 3.70E-16 |
| ubiquitin-like protein transferase activity (GO:0019787)                                                                     | 412  | 247  | 161.62 | + | 1.53 | 4.58E-07 |
| ubiquitin-protein transferase activity (GO:0004842)                                                                          | 397  | 237  | 155.74 | + | 1.52 | 1.52E-06 |
| protein dimerization activity (GO:0046983)                                                                                   | 1243 | 742  | 487.61 | + | 1.52 | 4.03E-25 |

|                                                                                                                              |      |      |         |   |      |           |
|------------------------------------------------------------------------------------------------------------------------------|------|------|---------|---|------|-----------|
| cation transmembrane transporter activity (GO:0008324)                                                                       | 578  | 345  | 226.74  | + | 1.52 | 2.08E-10  |
| anion transmembrane transporter activity (GO:0008509)                                                                        | 186  | 111  | 72.97   | + | 1.52 | 4.78E-02  |
| phosphatidylinositol binding (GO:0035091)                                                                                    | 208  | 124  | 81.60   | + | 1.52 | 1.71E-02  |
| substrate-specific transporter activity (GO:0022892)                                                                         | 1050 | 625  | 411.90  | + | 1.52 | 2.05E-20  |
| G-protein coupled receptor binding (GO:0001664)                                                                              | 261  | 155  | 102.39  | + | 1.51 | 1.68E-03  |
| transmembrane transporter activity (GO:0022857)                                                                              | 977  | 577  | 383.27  | + | 1.51 | 6.07E-18  |
| transcription factor binding (GO:0008134)                                                                                    | 559  | 330  | 219.29  | + | 1.50 | 2.61E-09  |
| transcription factor activity, RNA polymerase II core promoter proximal region sequence-specific binding (GO:0000982)        | 353  | 208  | 138.48  | + | 1.50 | 4.26E-05  |
| RNA polymerase II core promoter proximal region sequence-specific DNA binding (GO:0000978)                                   | 331  | 195  | 129.85  | + | 1.50 | 1.18E-04  |
| monovalent inorganic cation transmembrane transporter activity (GO:0015077)                                                  | 338  | 199  | 132.59  | + | 1.50 | 9.05E-05  |
| phospholipid binding (GO:0005543)                                                                                            | 338  | 198  | 132.59  | + | 1.49 | 1.38E-04  |
| transporter activity (GO:0005215)                                                                                            | 1231 | 716  | 482.91  | + | 1.48 | 2.90E-21  |
| molecular function regulator (GO:0098772)                                                                                    | 1156 | 671  | 453.48  | + | 1.48 | 1.53E-19  |
| core promoter proximal region sequence-specific DNA binding (GO:0000987)                                                     | 350  | 203  | 137.30  | + | 1.48 | 1.89E-04  |
| core promoter proximal region DNA binding (GO:0001159)                                                                       | 352  | 204  | 138.09  | + | 1.48 | 1.85E-04  |
| RNA polymerase II transcription factor activity, sequence-specific DNA binding (GO:0000981)                                  | 631  | 365  | 247.53  | + | 1.47 | 2.10E-09  |
| chromatin binding (GO:0003682)                                                                                               | 511  | 295  | 200.46  | + | 1.47 | 3.89E-07  |
| GTP binding (GO:0005525)                                                                                                     | 376  | 216  | 147.50  | + | 1.46 | 1.48E-04  |
| protein complex binding (GO:0032403)                                                                                         | 857  | 492  | 336.19  | + | 1.46 | 7.11E-13  |
| protein binding (GO:0005515)                                                                                                 | 6478 | 3702 | 2541.24 | + | 1.46 | 1.36E-145 |
| regulatory region nucleic acid binding (GO:0001067)                                                                          | 787  | 449  | 308.73  | + | 1.45 | 3.72E-11  |
| regulatory region DNA binding (GO:0000975)                                                                                   | 784  | 447  | 307.55  | + | 1.45 | 4.69E-11  |
| tubulin binding (GO:0015631)                                                                                                 | 279  | 159  | 109.45  | + | 1.45 | 1.14E-02  |
| transcription regulatory region DNA binding (GO:0044212)                                                                     | 781  | 445  | 306.38  | + | 1.45 | 5.91E-11  |
| macromolecular complex binding (GO:0044877)                                                                                  | 1408 | 802  | 552.34  | + | 1.45 | 1.03E-21  |
| guanyl ribonucleotide binding (GO:0032561)                                                                                   | 397  | 226  | 155.74  | + | 1.45 | 1.46E-04  |
| transferase activity (GO:0016740)                                                                                            | 2243 | 1275 | 879.90  | + | 1.45 | 1.21E-36  |
| guanyl nucleotide binding (GO:0019001)                                                                                       | 398  | 226  | 156.13  | + | 1.45 | 1.75E-04  |
| enzyme regulator activity (GO:0030234)                                                                                       | 854  | 484  | 335.01  | + | 1.44 | 9.69E-12  |
| RNA polymerase II regulatory region DNA binding (GO:0001012)                                                                 | 563  | 319  | 220.86  | + | 1.44 | 5.01E-07  |
| sequence-specific double-stranded DNA binding (GO:1990837)                                                                   | 655  | 371  | 256.95  | + | 1.44 | 1.77E-08  |
| RNA polymerase II regulatory region sequence-specific DNA binding (GO:0000977)                                               | 557  | 314  | 218.50  | + | 1.44 | 1.16E-06  |
| transcription regulatory region sequence-specific DNA binding (GO:0000976)                                                   | 629  | 354  | 246.75  | + | 1.43 | 1.10E-07  |
| amide binding (GO:0033218)                                                                                                   | 292  | 164  | 114.55  | + | 1.43 | 1.78E-02  |
| actin binding (GO:0003779)                                                                                                   | 367  | 206  | 143.97  | + | 1.43 | 1.38E-03  |
| transcriptional activator activity, RNA polymerase II transcription regulatory region sequence-specific binding (GO:0001228) | 337  | 189  | 132.20  | + | 1.43 | 4.14E-03  |
| double-stranded DNA binding (GO:0003690)                                                                                     | 739  | 414  | 289.90  | + | 1.43 | 4.55E-09  |
| anion binding (GO:0043168)                                                                                                   | 275  | 154  | 107.88  | + | 1.43 | 3.81E-02  |
| active transmembrane transporter activity (GO:0022804)                                                                       | 356  | 198  | 139.65  | + | 1.42 | 3.99E-03  |
| purine nucleotide binding (GO:0017076)                                                                                       | 1786 | 978  | 700.63  | + | 1.40 | 7.50E-22  |
| ribonucleotide binding (GO:0032553)                                                                                          | 1792 | 979  | 702.98  | + | 1.39 | 1.43E-21  |
| purine ribonucleotide binding (GO:0032555)                                                                                   | 1776 | 970  | 696.70  | + | 1.39 | 2.63E-21  |

|                                                                                                 |       |      |         |   |      |           |
|-------------------------------------------------------------------------------------------------|-------|------|---------|---|------|-----------|
| nucleoside binding (GO:0001882)                                                                 | 1750  | 955  | 686.50  | + | 1.39 | 8.16E-21  |
| hydrolase activity, acting on ester bonds (GO:0016788)                                          | 726   | 396  | 284.80  | + | 1.39 | 3.49E-07  |
| ribonucleoside binding (GO:0032549)                                                             | 1743  | 950  | 683.76  | + | 1.39 | 1.57E-20  |
| purine ribonucleoside binding (GO:0032550)                                                      | 1740  | 948  | 682.58  | + | 1.39 | 1.97E-20  |
| purine nucleoside binding (GO:0001883)                                                          | 1743  | 949  | 683.76  | + | 1.39 | 2.26E-20  |
| adenyl nucleotide binding (GO:0030554)                                                          | 1428  | 777  | 560.19  | + | 1.39 | 4.77E-16  |
| purine ribonucleoside triphosphate binding (GO:0035639)                                         | 1732  | 942  | 679.44  | + | 1.39 | 4.60E-20  |
| carbohydrate derivative binding (GO:0097367)                                                    | 2125  | 1155 | 833.61  | + | 1.39 | 2.19E-25  |
| adenyl ribonucleotide binding (GO:0032559)                                                      | 1420  | 770  | 557.05  | + | 1.38 | 1.55E-15  |
| zinc ion binding (GO:0008270)                                                                   | 1072  | 580  | 420.53  | + | 1.38 | 6.48E-11  |
| ATP binding (GO:0005524)                                                                        | 1385  | 745  | 543.32  | + | 1.37 | 3.55E-14  |
| sequence-specific DNA binding (GO:0043565)                                                      | 981   | 524  | 384.83  | + | 1.36 | 8.32E-09  |
| lipid binding (GO:0008289)                                                                      | 625   | 333  | 245.18  | + | 1.36 | 9.51E-05  |
| nucleic acid binding transcription factor activity (GO:0001071)                                 | 997   | 530  | 391.11  | + | 1.36 | 1.27E-08  |
| transcription factor activity, sequence-specific DNA binding (GO:0003700)                       | 997   | 530  | 391.11  | + | 1.36 | 1.27E-08  |
| ion binding (GO:0043167)                                                                        | 3686  | 1949 | 1445.97 | + | 1.35 | 3.66E-40  |
| nucleotide binding (GO:0000166)                                                                 | 2285  | 1208 | 896.38  | + | 1.35 | 2.01E-22  |
| nucleoside phosphate binding (GO:1901265)                                                       | 2285  | 1208 | 896.38  | + | 1.35 | 2.01E-22  |
| small molecule binding (GO:0036094)                                                             | 2465  | 1302 | 966.99  | + | 1.35 | 2.22E-24  |
| metal ion binding (GO:0046872)                                                                  | 3472  | 1831 | 1362.02 | + | 1.34 | 1.59E-36  |
| cation binding (GO:0043169)                                                                     | 3515  | 1853 | 1378.89 | + | 1.34 | 5.56E-37  |
| calcium ion binding (GO:0005509)                                                                | 679   | 357  | 266.36  | + | 1.34 | 1.14E-04  |
| receptor binding (GO:0005102)                                                                   | 1545  | 804  | 606.08  | + | 1.33 | 2.75E-12  |
| transition metal ion binding (GO:0046914)                                                       | 1375  | 709  | 539.40  | + | 1.31 | 8.60E-10  |
| catalytic activity (GO:0003824)                                                                 | 5653  | 2898 | 2217.60 | + | 1.31 | 8.92E-55  |
| pyrophosphatase activity (GO:0016462)                                                           | 724   | 366  | 284.02  | + | 1.29 | 3.00E-03  |
| hydrolase activity, acting on acid anhydrides, in phosphorus-containing anhydrides (GO:0016818) | 726   | 367  | 284.80  | + | 1.29 | 2.91E-03  |
| binding (GO:0005488)                                                                            | 12007 | 6014 | 4710.20 | + | 1.28 | 9.38E-160 |
| hydrolase activity, acting on acid anhydrides (GO:0016817)                                      | 733   | 367  | 287.55  | + | 1.28 | 6.68E-03  |
| poly(A) RNA binding (GO:0044822)                                                                | 1181  | 591  | 463.29  | + | 1.28 | 6.79E-06  |
| DNA binding (GO:0003677)                                                                        | 1817  | 908  | 712.79  | + | 1.27 | 3.34E-10  |
| nucleoside-triphosphatase activity (GO:0017111)                                                 | 678   | 337  | 265.97  | + | 1.27 | 2.95E-02  |
| heterocyclic compound binding (GO:1901363)                                                      | 5569  | 2727 | 2184.65 | + | 1.25 | 4.82E-35  |
| organic cyclic compound binding (GO:0097159)                                                    | 5646  | 2762 | 2214.86 | + | 1.25 | 2.30E-35  |
| hydrolase activity (GO:0016787)                                                                 | 2384  | 1155 | 935.21  | + | 1.24 | 2.98E-10  |
| RNA binding (GO:0003723)                                                                        | 1651  | 769  | 647.67  | + | 1.19 | 2.01E-03  |
| nucleic acid binding (GO:0003676)                                                               | 3721  | 1713 | 1459.70 | + | 1.17 | 2.23E-09  |
| molecular_function (GO:0003674)                                                                 | 16806 | 7710 | 6592.79 | + | 1.17 | 3.54E-154 |
| signal transducer activity (GO:0004871)                                                         | 2687  | 803  | 1054.08 | - | .76  | 2.21E-14  |
| receptor activity (GO:0004872)                                                                  | 2626  | 718  | 1030.15 | - | .70  | 3.55E-24  |
| molecular transducer activity (GO:0060089)                                                      | 2626  | 718  | 1030.15 | - | .70  | 3.55E-24  |
| signaling receptor activity (GO:0038023)                                                        | 2424  | 621  | 950.91  | - | .65  | 7.87E-30  |

|                                                        |      |      |         |   |       |          |
|--------------------------------------------------------|------|------|---------|---|-------|----------|
| transmembrane receptor activity (GO:0099600)           | 2369 | 582  | 929.33  | - | .63   | 2.49E-34 |
| transmembrane signaling receptor activity (GO:0004888) | 2326 | 557  | 912.46  | - | .61   | 6.71E-37 |
| Unclassified (UNCLASSIFIED)                            | 6975 | 1619 | 2736.21 | - | .59   | 0.00E00  |
| structural constituent of ribosome (GO:0003735)        | 497  | 113  | 194.97  | - | .58   | 2.23E-07 |
| G-protein coupled receptor activity (GO:0004930)       | 1955 | 368  | 766.92  | - | .48   | 1.32E-58 |
| olfactory receptor activity (GO:0004984)               | 1389 | 167  | 544.89  | - | .31   | 1.64E-80 |
| odorant binding (GO:0005549)                           | 369  | 40   | 144.75  | - | .28   | 8.39E-22 |
| taste receptor activity (GO:0008527)                   | 42   | 2    | 16.48   | - | < 0.2 | 2.64E-02 |
| immunoglobulin receptor binding (GO:0034987)           | 64   | 2    | 25.11   | - | < 0.2 | 1.03E-05 |
