# Supplementary material for: The RNA-Binding Protein hnRNP K Mediates the Effect of BDNF on Dendritic mRNA Metabolism and Regulates Synaptic NMDA Receptors in Hippocampal Neurons
Source: PubMed Central journal article supplement (PMC5732018; doi:10.1523/eneuro.0268-17.2017), 2017-12-12
Supplement: sup_enu-eN-NWR-0268-17-s09.pdf [file sup_enu-eN-NWR-0268-17-s09.pdf]

**Table 1-6 - Biological processes associated with mRNAs co-immunoprecipitated with hnRNP K and regulated by BDNF as assessed by Gene Ontology**

| GO biological process                                                                | Rattus norvegicus<br>(reference list) | uploaded<br>list | (expected) | (over/under) | (fold enrichment) | (P-value) |
|--------------------------------------------------------------------------------------|---------------------------------------|------------------|------------|--------------|-------------------|-----------|
| organelle transport along microtubule (GO:0072384)                                   | 55                                    | 35               | 14.20      | +            | 2.47              | 1.81E-02  |
| central nervous system neuron development (GO:0021954)                               | 85                                    | 53               | 21.94      | +            | 2.42              | 1.07E-04  |
| negative regulation of protein depolymerization (GO:1901880)                         | 55                                    | 34               | 14.20      | +            | 2.40              | 4.55E-02  |
| dendrite development (GO:0016358)                                                    | 106                                   | 65               | 27.36      | +            | 2.38              | 5.08E-06  |
| membrane docking (GO:0022406)                                                        | 64                                    | 38               | 16.52      | +            | 2.30              | 3.32E-02  |
| regulation of protein depolymerization (GO:1901879)                                  | 75                                    | 44               | 19.36      | +            | 2.27              | 8.34E-03  |
| regulation of dendrite morphogenesis (GO:0048814)                                    | 94                                    | 55               | 24.26      | +            | 2.27              | 4.49E-04  |
| neurotransmitter secretion (GO:0007269)                                              | 102                                   | 59               | 26.33      | +            | 2.24              | 2.24E-04  |
| signal release from synapse (GO:0099643)                                             | 102                                   | 59               | 26.33      | +            | 2.24              | 2.24E-04  |
| presynaptic process involved in chemical synaptic transmission (GO:0099531)          | 106                                   | 61               | 27.36      | +            | 2.23              | 1.58E-04  |
| regulation of protein complex disassembly (GO:0043244)                               | 87                                    | 50               | 22.46      | +            | 2.23              | 2.91E-03  |
| regulation of neurotransmitter transport (GO:0051588)                                | 70                                    | 40               | 18.07      | +            | 2.21              | 4.57E-02  |
| positive regulation of dendrite development (GO:1900006)                             | 91                                    | 52               | 23.49      | +            | 2.21              | 2.04E-03  |
| establishment of vesicle localization (GO:0051650)                                   | 160                                   | 91               | 41.30      | +            | 2.20              | 1.16E-07  |
| vesicle localization (GO:0051648)                                                    | 169                                   | 96               | 43.62      | +            | 2.20              | 3.48E-08  |
| synaptic vesicle localization (GO:0097479)                                           | 110                                   | 62               | 28.39      | +            | 2.18              | 2.50E-04  |
| regulation of protein dephosphorylation (GO:0035304)                                 | 88                                    | 49               | 22.71      | +            | 2.16              | 9.02E-03  |
| amino acid transport (GO:0006865)                                                    | 90                                    | 50               | 23.23      | +            | 2.15              | 7.53E-03  |
| Golgi organization (GO:0007030)                                                      | 90                                    | 50               | 23.23      | +            | 2.15              | 7.53E-03  |
| synaptic vesicle transport (GO:0048489)                                              | 108                                   | 60               | 27.88      | +            | 2.15              | 6.67E-04  |
| establishment of synaptic vesicle localization (GO:0097480)                          | 108                                   | 60               | 27.88      | +            | 2.15              | 6.67E-04  |
| positive regulation of exocytosis (GO:0045921)                                       | 83                                    | 46               | 21.42      | +            | 2.15              | 2.12E-02  |
| regulation of axonogenesis (GO:0050770)                                              | 181                                   | 100              | 46.72      | +            | 2.14              | 5.85E-08  |
| protein dephosphorylation (GO:0006470)                                               | 176                                   | 97               | 45.43      | +            | 2.14              | 1.36E-07  |
| regulation of synapse organization (GO:0050807)                                      | 120                                   | 66               | 30.97      | +            | 2.13              | 2.25E-04  |
| negative regulation of protein serine/threonine kinase activity (GO:0071901)         | 122                                   | 67               | 31.49      | +            | 2.13              | 1.87E-04  |
| hippocampus development (GO:0021766)                                                 | 106                                   | 58               | 27.36      | +            | 2.12              | 1.75E-03  |
| regulation of potassium ion transport (GO:0043266)                                   | 86                                    | 47               | 22.20      | +            | 2.12              | 2.39E-02  |
| regulation of proteasomal ubiquitin-dependent protein catabolic process (GO:0032434) | 105                                   | 57               | 27.10      | +            | 2.10              | 2.83E-03  |
| synaptic vesicle cycle (GO:0099504)                                                  | 94                                    | 51               | 24.26      | +            | 2.10              | 1.14E-02  |
| regulation of extent of cell growth (GO:0061387)                                     | 115                                   | 62               | 29.68      | +            | 2.09              | 1.13E-03  |
| regulation of cell morphogenesis involved in differentiation (GO:0010769)            | 366                                   | 197              | 94.47      | +            | 2.09              | 8.25E-17  |
| regulation of neuron projection development (GO:0010975)                             | 498                                   | 268              | 128.54     | +            | 2.09              | 8.31E-24  |
| negative regulation of neuron projection development (GO:0010977)                    | 147                                   | 79               | 37.94      | +            | 2.08              | 2.81E-05  |

|                                                                                                |     |     |        |   |      |          |
|------------------------------------------------------------------------------------------------|-----|-----|--------|---|------|----------|
| negative regulation of neuron differentiation (GO:0045665)                                     | 222 | 119 | 57.30  | + | 2.08 | 4.41E-09 |
| regulation of dendrite development (GO:0050773)                                                | 157 | 84  | 40.52  | + | 2.07 | 1.12E-05 |
| negative regulation of neurogenesis (GO:0050768)                                               | 285 | 152 | 73.56  | + | 2.07 | 4.36E-12 |
| neuron projection development (GO:0031175)                                                     | 592 | 315 | 152.80 | + | 2.06 | 1.15E-27 |
| regulation of cell size (GO:0008361)                                                           | 192 | 102 | 49.56  | + | 2.06 | 3.10E-07 |
| neurotransmitter transport (GO:0006836)                                                        | 147 | 78  | 37.94  | + | 2.06 | 5.95E-05 |
| negative regulation of cell morphogenesis involved in differentiation (GO:0010771)             | 115 | 61  | 29.68  | + | 2.06 | 2.41E-03 |
| negative regulation of cell development (GO:0010721)                                           | 340 | 180 | 87.76  | + | 2.05 | 1.85E-14 |
| regulation of synapse structure or activity (GO:0050803)                                       | 280 | 148 | 72.27  | + | 2.05 | 2.11E-11 |
| regulation of proteasomal protein catabolic process (GO:0061136)                               | 140 | 74  | 36.13  | + | 2.05 | 1.65E-04 |
| negative regulation of nervous system development (GO:0051961)                                 | 307 | 162 | 79.24  | + | 2.04 | 1.20E-12 |
| regulation of neurotransmitter levels (GO:0001505)                                             | 199 | 105 | 51.36  | + | 2.04 | 2.36E-07 |
| neuron projection morphogenesis (GO:0048812)                                                   | 425 | 224 | 109.69 | + | 2.04 | 2.20E-18 |
| positive regulation of neuron projection development (GO:0010976)                              | 293 | 154 | 75.62  | + | 2.04 | 9.15E-12 |
| positive regulation of proteolysis involved in cellular protein catabolic process (GO:1903052) | 99  | 52  | 25.55  | + | 2.04 | 2.24E-02 |
| synapse organization (GO:0050808)                                                              | 139 | 73  | 35.88  | + | 2.03 | 2.61E-04 |
| regulation of synaptic plasticity (GO:0048167)                                                 | 181 | 95  | 46.72  | + | 2.03 | 2.59E-06 |
| regulation of axon extension (GO:0030516)                                                      | 101 | 53  | 26.07  | + | 2.03 | 1.86E-02 |
| Golgi vesicle transport (GO:0048193)                                                           | 180 | 94  | 46.46  | + | 2.02 | 4.08E-06 |
| regulation of Rho protein signal transduction (GO:0035023)                                     | 115 | 60  | 29.68  | + | 2.02 | 5.04E-03 |
| regulation of proteolysis involved in cellular protein catabolic process (GO:1903050)          | 163 | 85  | 42.07  | + | 2.02 | 2.83E-05 |
| axon development (GO:0061564)                                                                  | 359 | 187 | 92.66  | + | 2.02 | 1.97E-14 |
| mitotic cell cycle phase transition (GO:0044772)                                               | 121 | 63  | 31.23  | + | 2.02 | 2.89E-03 |
| negative regulation of cell projection organization (GO:0031345)                               | 173 | 90  | 44.65  | + | 2.02 | 1.12E-05 |
| axonogenesis (GO:0007409)                                                                      | 325 | 169 | 83.88  | + | 2.01 | 9.69E-13 |
| regulation of neuron apoptotic process (GO:0043523)                                            | 243 | 126 | 62.72  | + | 2.01 | 8.33E-09 |
| learning (GO:0007612)                                                                          | 159 | 82  | 41.04  | + | 2.00 | 8.45E-05 |
| cell cycle phase transition (GO:0044770)                                                       | 128 | 66  | 33.04  | + | 2.00 | 2.16E-03 |
| regulation of exocytosis (GO:0017157)                                                          | 183 | 94  | 47.23  | + | 1.99 | 9.10E-06 |
| positive regulation of cellular protein catabolic process (GO:1903364)                         | 113 | 58  | 29.17  | + | 1.99 | 1.25E-02 |
| neuron projection guidance (GO:0097485)                                                        | 195 | 100 | 50.33  | + | 1.99 | 2.99E-06 |
| negative regulation of neuron apoptotic process (GO:0043524)                                   | 160 | 82  | 41.30  | + | 1.99 | 1.10E-04 |
| protein polyubiquitination (GO:0000209)                                                        | 162 | 83  | 41.81  | + | 1.99 | 9.13E-05 |
| positive regulation of cell growth (GO:0030307)                                                | 162 | 83  | 41.81  | + | 1.99 | 9.13E-05 |
| phospholipid biosynthetic process (GO:0008654)                                                 | 123 | 63  | 31.75  | + | 1.98 | 4.92E-03 |
| cell morphogenesis involved in neuron differentiation (GO:0048667)                             | 389 | 199 | 100.40 | + | 1.98 | 1.02E-14 |
| dephosphorylation (GO:0016311)                                                                 | 270 | 138 | 69.69  | + | 1.98 | 1.97E-09 |
| negative regulation of MAPK cascade (GO:0043409)                                               | 155 | 79  | 40.01  | + | 1.97 | 2.49E-04 |

|                                                                      |     |     |        |   |      |          |
|----------------------------------------------------------------------|-----|-----|--------|---|------|----------|
| regulation of neuron differentiation (GO:0045664)                    | 662 | 337 | 170.87 | + | 1.97 | 1.93E-26 |
| regulation of cellular protein catabolic process (GO:1903362)        | 183 | 93  | 47.23  | + | 1.97 | 1.84E-05 |
| developmental growth involved in morphogenesis (GO:0060560)          | 122 | 62  | 31.49  | + | 1.97 | 7.71E-03 |
| cerebellum development (GO:0021549)                                  | 126 | 64  | 32.52  | + | 1.97 | 5.30E-03 |
| axon guidance (GO:0007411)                                           | 193 | 98  | 49.81  | + | 1.97 | 7.27E-06 |
| pallium development (GO:0021543)                                     | 203 | 103 | 52.40  | + | 1.97 | 2.87E-06 |
| modulation of synaptic transmission (GO:0050804)                     | 340 | 172 | 87.76  | + | 1.96 | 5.81E-12 |
| regulation of cell projection organization (GO:0031344)              | 657 | 331 | 169.58 | + | 1.95 | 3.70E-25 |
| regulation of ion transmembrane transporter activity (GO:0032412)    | 191 | 96  | 49.30  | + | 1.95 | 1.75E-05 |
| regulation of transmembrane transporter activity (GO:0022898)        | 197 | 99  | 50.85  | + | 1.95 | 1.00E-05 |
| limbic system development (GO:0021761)                               | 136 | 68  | 35.10  | + | 1.94 | 4.17E-03 |
| regulation of transporter activity (GO:0032409)                      | 210 | 105 | 54.20  | + | 1.94 | 4.22E-06 |
| regulation of neuron death (GO:1901214)                              | 318 | 159 | 82.08  | + | 1.94 | 1.80E-10 |
| positive regulation of cell projection organization (GO:0031346)     | 372 | 186 | 96.02  | + | 1.94 | 1.15E-12 |
| regulation of Ras protein signal transduction (GO:0046578)           | 200 | 100 | 51.62  | + | 1.94 | 1.07E-05 |
| regulation of cell morphogenesis (GO:0022604)                        | 582 | 289 | 150.22 | + | 1.92 | 1.10E-20 |
| organelle fusion (GO:0048284)                                        | 127 | 63  | 32.78  | + | 1.92 | 1.36E-02 |
| regulation of cellular component size (GO:0032535)                   | 359 | 178 | 92.66  | + | 1.92 | 1.08E-11 |
| establishment or maintenance of cell polarity (GO:0007163)           | 152 | 75  | 39.23  | + | 1.91 | 1.85E-03 |
| regulation of small GTPase mediated signal transduction (GO:0051056) | 223 | 110 | 57.56  | + | 1.91 | 3.47E-06 |
| metencephalon development (GO:0022037)                               | 138 | 68  | 35.62  | + | 1.91 | 6.84E-03 |
| regulation of neurogenesis (GO:0050767)                              | 802 | 395 | 207.00 | + | 1.91 | 1.06E-28 |
| establishment of protein localization to membrane (GO:0090150)       | 173 | 85  | 44.65  | + | 1.90 | 3.65E-04 |
| negative regulation of cell growth (GO:0030308)                      | 173 | 85  | 44.65  | + | 1.90 | 3.65E-04 |
| chemical synaptic transmission (GO:0007268)                          | 334 | 164 | 86.21  | + | 1.90 | 3.06E-10 |
| trans-synaptic signaling (GO:0099537)                                | 334 | 164 | 86.21  | + | 1.90 | 3.06E-10 |
| synaptic signaling (GO:0099536)                                      | 334 | 164 | 86.21  | + | 1.90 | 3.06E-10 |
| anterograde trans-synaptic signaling (GO:0098916)                    | 334 | 164 | 86.21  | + | 1.90 | 3.06E-10 |
| establishment of organelle localization (GO:0051656)                 | 314 | 154 | 81.05  | + | 1.90 | 1.98E-09 |
| telencephalon development (GO:0021537)                               | 292 | 143 | 75.37  | + | 1.90 | 1.53E-08 |
| positive regulation of neuron differentiation (GO:0045666)           | 384 | 188 | 99.11  | + | 1.90 | 5.55E-12 |
| neuron development (GO:0048666)                                      | 760 | 372 | 196.16 | + | 1.90 | 2.43E-26 |
| regulation of nervous system development (GO:0051960)                | 897 | 439 | 231.52 | + | 1.90 | 1.08E-31 |
| negative regulation of protein kinase activity (GO:0006469)          | 229 | 112 | 59.11  | + | 1.89 | 3.87E-06 |
| learning or memory (GO:0007611)                                      | 272 | 133 | 70.20  | + | 1.89 | 9.87E-08 |
| positive regulation of synaptic transmission (GO:0050806)            | 131 | 64  | 33.81  | + | 1.89 | 1.84E-02 |
| Ras protein signal transduction (GO:0007265)                         | 129 | 63  | 33.30  | + | 1.89 | 2.22E-02 |
| organelle localization (GO:0051640)                                  | 385 | 188 | 99.37  | + | 1.89 | 7.04E-12 |

|                                                                                    |      |     |        |   |      |          |
|------------------------------------------------------------------------------------|------|-----|--------|---|------|----------|
| negative regulation of neuron death (GO:1901215)                                   | 209  | 102 | 53.94  | + | 1.89 | 2.48E-05 |
| endosomal transport (GO:0016197)                                                   | 191  | 93  | 49.30  | + | 1.89 | 1.32E-04 |
| positive regulation of cell morphogenesis involved in differentiation (GO:0010770) | 185  | 90  | 47.75  | + | 1.88 | 2.32E-04 |
| gliogenesis (GO:0042063)                                                           | 218  | 106 | 56.27  | + | 1.88 | 1.50E-05 |
| phospholipid metabolic process (GO:0006644)                                        | 249  | 121 | 64.27  | + | 1.88 | 1.16E-06 |
| maintenance of location (GO:0051235)                                               | 132  | 64  | 34.07  | + | 1.88 | 2.33E-02 |
| cerebral cortex development (GO:0021987)                                           | 128  | 62  | 33.04  | + | 1.88 | 3.39E-02 |
| negative regulation of kinase activity (GO:0033673)                                | 246  | 119 | 63.49  | + | 1.87 | 2.13E-06 |
| regulation of cell development (GO:0060284)                                        | 971  | 469 | 250.62 | + | 1.87 | 8.42E-33 |
| brain development (GO:0007420)                                                     | 821  | 396 | 211.90 | + | 1.87 | 5.07E-27 |
| glycerophospholipid metabolic process (GO:0006650)                                 | 168  | 81  | 43.36  | + | 1.87 | 1.56E-03 |
| positive regulation of cellular catabolic process (GO:0031331)                     | 195  | 94  | 50.33  | + | 1.87 | 1.76E-04 |
| vesicle organization (GO:0016050)                                                  | 206  | 99  | 53.17  | + | 1.86 | 8.74E-05 |
| protein localization to plasma membrane (GO:0072659)                               | 150  | 72  | 38.72  | + | 1.86 | 8.35E-03 |
| regulation of cellular catabolic process (GO:0031329)                              | 311  | 149 | 80.27  | + | 1.86 | 2.56E-08 |
| vacuolar transport (GO:0007034)                                                    | 228  | 109 | 58.85  | + | 1.85 | 2.16E-05 |
| positive regulation of protein catabolic process (GO:0045732)                      | 182  | 87  | 46.98  | + | 1.85 | 8.10E-04 |
| lipid modification (GO:0030258)                                                    | 159  | 76  | 41.04  | + | 1.85 | 4.98E-03 |
| head development (GO:0060322)                                                      | 861  | 411 | 222.23 | + | 1.85 | 2.80E-27 |
| forebrain development (GO:0030900)                                                 | 443  | 211 | 114.34 | + | 1.85 | 1.52E-12 |
| regulation of cell growth (GO:0001558)                                             | 395  | 188 | 101.95 | + | 1.84 | 7.06E-11 |
| positive regulation of nervous system development (GO:0051962)                     | 540  | 257 | 139.38 | + | 1.84 | 8.44E-16 |
| peptidyl-tyrosine modification (GO:0018212)                                        | 143  | 68  | 36.91  | + | 1.84 | 2.21E-02 |
| positive regulation of growth (GO:0045927)                                         | 263  | 125 | 67.88  | + | 1.84 | 2.19E-06 |
| peptidyl-tyrosine phosphorylation (GO:0018108)                                     | 141  | 67  | 36.39  | + | 1.84 | 2.66E-02 |
| positive regulation of developmental growth (GO:0048639)                           | 179  | 85  | 46.20  | + | 1.84 | 1.47E-03 |
| central nervous system development (GO:0007417)                                    | 1018 | 482 | 262.75 | + | 1.83 | 8.36E-32 |
| exocytosis (GO:0006887)                                                            | 207  | 98  | 53.43  | + | 1.83 | 2.07E-04 |
| regulation of protein catabolic process (GO:0042176)                               | 311  | 147 | 80.27  | + | 1.83 | 9.11E-08 |
| peptidyl-serine phosphorylation (GO:0018105)                                       | 144  | 68  | 37.17  | + | 1.83 | 2.77E-02 |
| hindbrain development (GO:0030902)                                                 | 178  | 84  | 45.94  | + | 1.83 | 2.22E-03 |
| protein transport (GO:0015031)                                                     | 946  | 445 | 244.17 | + | 1.82 | 1.78E-28 |
| regulation of membrane potential (GO:0042391)                                      | 375  | 176 | 96.79  | + | 1.82 | 1.59E-09 |
| cell division (GO:0051301)                                                         | 277  | 130 | 71.50  | + | 1.82 | 2.10E-06 |
| protein localization to cell periphery (GO:1990778)                                | 162  | 76  | 41.81  | + | 1.82 | 9.75E-03 |
| peptidyl-serine modification (GO:0018209)                                          | 160  | 75  | 41.30  | + | 1.82 | 1.17E-02 |
| central nervous system neuron differentiation (GO:0021953)                         | 192  | 90  | 49.56  | + | 1.82 | 1.13E-03 |
| positive regulation of neurogenesis (GO:0050769)                                   | 476  | 223 | 122.86 | + | 1.82 | 1.18E-12 |

|                                                                               |      |      |        |   |      |          |
|-------------------------------------------------------------------------------|------|------|--------|---|------|----------|
| regulation of actin filament length (GO:0030832)                              | 158  | 74   | 40.78  | + | 1.81 | 1.41E-02 |
| regulation of actin polymerization or depolymerization (GO:0008064)           | 158  | 74   | 40.78  | + | 1.81 | 1.41E-02 |
| glial cell differentiation (GO:0010001)                                       | 171  | 80   | 44.14  | + | 1.81 | 5.79E-03 |
| negative regulation of cellular component organization (GO:0051129)           | 633  | 296  | 163.38 | + | 1.81 | 1.51E-17 |
| regulation of catabolic process (GO:0009894)                                  | 455  | 212  | 117.44 | + | 1.81 | 1.13E-11 |
| neuron differentiation (GO:0030182)                                           | 968  | 451  | 249.85 | + | 1.81 | 5.02E-28 |
| membrane fusion (GO:0061025)                                                  | 146  | 68   | 37.68  | + | 1.80 | 4.30E-02 |
| cellular response to insulin stimulus (GO:0032869)                            | 159  | 74   | 41.04  | + | 1.80 | 1.76E-02 |
| cognition (GO:0050890)                                                        | 303  | 141  | 78.21  | + | 1.80 | 6.58E-07 |
| establishment of protein localization (GO:0045184)                            | 1072 | 498  | 276.69 | + | 1.80 | 4.80E-31 |
| negative regulation of protein phosphorylation (GO:0001933)                   | 399  | 185  | 102.98 | + | 1.80 | 1.09E-09 |
| negative regulation of intracellular signal transduction (GO:1902532)         | 466  | 216  | 120.28 | + | 1.80 | 1.02E-11 |
| negative regulation of transferase activity (GO:0051348)                      | 274  | 127  | 70.72  | + | 1.80 | 6.97E-06 |
| regulation of developmental growth (GO:0048638)                               | 337  | 156  | 86.98  | + | 1.79 | 9.75E-08 |
| generation of neurons (GO:0048699)                                            | 1493 | 691  | 385.35 | + | 1.79 | 2.20E-44 |
| positive regulation of catabolic process (GO:0009896)                         | 255  | 118  | 65.82  | + | 1.79 | 2.94E-05 |
| secretion by cell (GO:0032940)                                                | 383  | 177  | 98.85  | + | 1.79 | 4.76E-09 |
| positive regulation of apoptotic signaling pathway (GO:2001235)               | 169  | 78   | 43.62  | + | 1.79 | 1.29E-02 |
| protein localization to membrane (GO:0072657)                                 | 297  | 137  | 76.66  | + | 1.79 | 2.09E-06 |
| negative regulation of protein modification process (GO:0031400)              | 527  | 243  | 136.02 | + | 1.79 | 3.01E-13 |
| regulation of vesicle-mediated transport (GO:0060627)                         | 454  | 209  | 117.18 | + | 1.78 | 5.69E-11 |
| signal release (GO:0023061)                                                   | 176  | 81   | 45.43  | + | 1.78 | 9.14E-03 |
| locomotory behavior (GO:0007626)                                              | 224  | 103  | 57.82  | + | 1.78 | 3.73E-04 |
| nervous system development (GO:0007399)                                       | 2238 | 1029 | 577.64 | + | 1.78 | 1.49E-68 |
| regulation of autophagy (GO:0010506)                                          | 198  | 91   | 51.10  | + | 1.78 | 2.22E-03 |
| regulation of protein polymerization (GO:0032271)                             | 172  | 79   | 44.39  | + | 1.78 | 1.32E-02 |
| cell projection organization (GO:0030030)                                     | 952  | 437  | 245.72 | + | 1.78 | 9.71E-26 |
| adult behavior (GO:0030534)                                                   | 170  | 78   | 43.88  | + | 1.78 | 1.59E-02 |
| negative regulation of phosphorylation (GO:0042326)                           | 436  | 200  | 112.53 | + | 1.78 | 2.99E-10 |
| cell projection morphogenesis (GO:0048858)                                    | 636  | 291  | 164.15 | + | 1.77 | 6.05E-16 |
| single-organism behavior (GO:0044708)                                         | 470  | 215  | 121.31 | + | 1.77 | 4.32E-11 |
| transmembrane receptor protein tyrosine kinase signaling pathway (GO:0007169) | 339  | 155  | 87.50  | + | 1.77 | 2.70E-07 |
| glycerolipid metabolic process (GO:0046486)                                   | 245  | 112  | 63.24  | + | 1.77 | 1.34E-04 |
| neurogenesis (GO:0022008)                                                     | 1608 | 734  | 415.03 | + | 1.77 | 1.91E-45 |
| autophagy (GO:0006914)                                                        | 301  | 137  | 77.69  | + | 1.76 | 4.79E-06 |
| behavior (GO:0007610)                                                         | 633  | 288  | 163.38 | + | 1.76 | 1.96E-15 |
| plasma membrane organization (GO:0007009)                                     | 209  | 95   | 53.94  | + | 1.76 | 1.98E-03 |
| endomembrane system organization (GO:0010256)                                 | 419  | 190  | 108.15 | + | 1.76 | 3.45E-09 |

|                                                                                         |      |     |        |   |      |          |
|-----------------------------------------------------------------------------------------|------|-----|--------|---|------|----------|
| modification-dependent protein catabolic process (GO:0019941)                           | 400  | 181 | 103.24 | + | 1.75 | 1.46E-08 |
| positive regulation of cell development (GO:0010720)                                    | 575  | 260 | 148.41 | + | 1.75 | 2.31E-13 |
| ubiquitin-dependent protein catabolic process (GO:0006511)                              | 392  | 177 | 101.18 | + | 1.75 | 3.02E-08 |
| cell part morphogenesis (GO:0032990)                                                    | 660  | 298 | 170.35 | + | 1.75 | 1.27E-15 |
| single-organism membrane organization (GO:0044802)                                      | 605  | 273 | 156.15 | + | 1.75 | 4.70E-14 |
| modification-dependent macromolecule catabolic process (GO:0043632)                     | 408  | 184 | 105.31 | + | 1.75 | 1.26E-08 |
| regulation of endocytosis (GO:0030100)                                                  | 213  | 96  | 54.98  | + | 1.75 | 2.47E-03 |
| intracellular protein transport (GO:0006886)                                            | 587  | 264 | 151.51 | + | 1.74 | 2.46E-13 |
| protein autophosphorylation (GO:0046777)                                                | 198  | 89  | 51.10  | + | 1.74 | 7.23E-03 |
| cell morphogenesis involved in differentiation (GO:0000904)                             | 554  | 249 | 142.99 | + | 1.74 | 2.13E-12 |
| small GTPase mediated signal transduction (GO:0007264)                                  | 336  | 151 | 86.72  | + | 1.74 | 1.53E-06 |
| actin filament organization (GO:0007015)                                                | 185  | 83  | 47.75  | + | 1.74 | 1.76E-02 |
| signal transduction by protein phosphorylation (GO:0023014)                             | 214  | 96  | 55.23  | + | 1.74 | 3.02E-03 |
| connective tissue development (GO:0061448)                                              | 212  | 95  | 54.72  | + | 1.74 | 3.62E-03 |
| negative regulation of cell migration (GO:0030336)                                      | 217  | 97  | 56.01  | + | 1.73 | 3.07E-03 |
| regulation of ion transmembrane transport (GO:0034765)                                  | 396  | 177 | 102.21 | + | 1.73 | 6.66E-08 |
| cellular component disassembly (GO:0022411)                                             | 282  | 126 | 72.79  | + | 1.73 | 6.41E-05 |
| actin cytoskeleton organization (GO:0030036)                                            | 383  | 171 | 98.85  | + | 1.73 | 1.62E-07 |
| actin filament-based process (GO:0030029)                                               | 424  | 189 | 109.44 | + | 1.73 | 1.65E-08 |
| negative regulation of phosphorus metabolic process (GO:0010563)                        | 552  | 246 | 142.47 | + | 1.73 | 8.07E-12 |
| negative regulation of phosphate metabolic process (GO:0045936)                         | 552  | 246 | 142.47 | + | 1.73 | 8.07E-12 |
| regulation of protein modification by small protein conjugation or removal (GO:1903320) | 211  | 94  | 54.46  | + | 1.73 | 5.28E-03 |
| regulation of transmembrane transport (GO:0034762)                                      | 411  | 183 | 106.08 | + | 1.73 | 4.03E-08 |
| regulation of cation transmembrane transport (GO:1904062)                               | 227  | 101 | 58.59  | + | 1.72 | 2.20E-03 |
| intracellular transport (GO:0046907)                                                    | 904  | 402 | 233.33 | + | 1.72 | 6.36E-21 |
| single-organism carbohydrate metabolic process (GO:0044723)                             | 470  | 209 | 121.31 | + | 1.72 | 1.42E-09 |
| phosphorus metabolic process (GO:0006793)                                               | 1725 | 767 | 445.23 | + | 1.72 | 9.70E-44 |
| phosphate-containing compound metabolic process (GO:0006796)                            | 1723 | 766 | 444.72 | + | 1.72 | 1.19E-43 |
| negative regulation of cellular component movement (GO:0051271)                         | 259  | 115 | 66.85  | + | 1.72 | 3.83E-04 |
| establishment of localization in cell (GO:0051649)                                      | 1170 | 519 | 301.98 | + | 1.72 | 8.78E-28 |
| regulation of anatomical structure size (GO:0090066)                                    | 519  | 230 | 133.96 | + | 1.72 | 1.22E-10 |
| apoptotic signaling pathway (GO:0097190)                                                | 271  | 120 | 69.95  | + | 1.72 | 2.29E-04 |
| secretion (GO:0046903)                                                                  | 511  | 226 | 131.89 | + | 1.71 | 2.51E-10 |
| striated muscle cell differentiation (GO:0051146)                                       | 197  | 87  | 50.85  | + | 1.71 | 1.86E-02 |
| regulation of binding (GO:0051098)                                                      | 315  | 139 | 81.30  | + | 1.71 | 2.38E-05 |
| protein localization (GO:0008104)                                                       | 1523 | 672 | 393.09 | + | 1.71 | 1.33E-36 |
| regulation of protein ubiquitination (GO:0031396)                                       | 186  | 82  | 48.01  | + | 1.71 | 3.79E-02 |
| proteasomal protein catabolic process (GO:0010498)                                      | 211  | 93  | 54.46  | + | 1.71 | 9.29E-03 |

|                                                                           |      |     |        |   |      |          |
|---------------------------------------------------------------------------|------|-----|--------|---|------|----------|
| regulation of cellular component biogenesis (GO:0044087)                  | 774  | 341 | 199.77 | + | 1.71 | 1.09E-16 |
| protein targeting (GO:0006605)                                            | 318  | 140 | 82.08  | + | 1.71 | 2.41E-05 |
| regulation of protein binding (GO:0043393)                                | 184  | 81  | 47.49  | + | 1.71 | 4.54E-02 |
| negative regulation of cell differentiation (GO:0045596)                  | 665  | 292 | 171.64 | + | 1.70 | 1.04E-13 |
| negative regulation of growth (GO:0045926)                                | 246  | 108 | 63.49  | + | 1.70 | 1.63E-03 |
| single-organism cellular localization (GO:1902580)                        | 695  | 305 | 179.38 | + | 1.70 | 2.08E-14 |
| regulation of cellular localization (GO:0060341)                          | 839  | 368 | 216.55 | + | 1.70 | 6.16E-18 |
| protein homooligomerization (GO:0051260)                                  | 283  | 124 | 73.04  | + | 1.70 | 2.39E-04 |
| regulation of cytoskeleton organization (GO:0051493)                      | 418  | 183 | 107.89 | + | 1.70 | 1.52E-07 |
| negative regulation of locomotion (GO:0040013)                            | 263  | 115 | 67.88  | + | 1.69 | 8.18E-04 |
| rhythmic process (GO:0048511)                                             | 341  | 149 | 88.01  | + | 1.69 | 1.23E-05 |
| regulation of actin cytoskeleton organization (GO:0032956)                | 284  | 124 | 73.30  | + | 1.69 | 2.88E-04 |
| carbohydrate homeostasis (GO:0033500)                                     | 213  | 93  | 54.98  | + | 1.69 | 1.35E-02 |
| protein phosphorylation (GO:0006468)                                      | 781  | 341 | 201.58 | + | 1.69 | 4.07E-16 |
| glucose homeostasis (GO:0042593)                                          | 213  | 93  | 54.98  | + | 1.69 | 1.35E-02 |
| regulation of protein serine/threonine kinase activity (GO:0071900)       | 433  | 189 | 111.76 | + | 1.69 | 9.10E-08 |
| cellular localization (GO:0051641)                                        | 1645 | 718 | 424.58 | + | 1.69 | 5.60E-38 |
| glycoprotein metabolic process (GO:0009100)                               | 282  | 123 | 72.79  | + | 1.69 | 3.44E-04 |
| cellular macromolecule localization (GO:0070727)                          | 1093 | 476 | 282.11 | + | 1.69 | 1.63E-23 |
| intracellular signal transduction (GO:0035556)                            | 1302 | 567 | 336.05 | + | 1.69 | 9.74E-29 |
| response to insulin (GO:0032868)                                          | 246  | 107 | 63.49  | + | 1.69 | 2.82E-03 |
| small molecule catabolic process (GO:0044282)                             | 246  | 107 | 63.49  | + | 1.69 | 2.82E-03 |
| establishment of protein localization to organelle (GO:0072594)           | 267  | 116 | 68.91  | + | 1.68 | 9.91E-04 |
| regulation of GTPase activity (GO:0043087)                                | 495  | 215 | 127.76 | + | 1.68 | 5.54E-09 |
| cellular protein localization (GO:0034613)                                | 1085 | 471 | 280.04 | + | 1.68 | 6.01E-23 |
| mitotic cell cycle (GO:0000278)                                           | 484  | 210 | 124.92 | + | 1.68 | 1.13E-08 |
| organic anion transport (GO:0015711)                                      | 242  | 105 | 62.46  | + | 1.68 | 4.03E-03 |
| cellular protein catabolic process (GO:0044257)                           | 482  | 209 | 124.41 | + | 1.68 | 1.34E-08 |
| phosphorylation (GO:0016310)                                              | 1063 | 460 | 274.37 | + | 1.68 | 4.61E-22 |
| mitotic cell cycle process (GO:1903047)                                   | 453  | 196 | 116.92 | + | 1.68 | 7.85E-08 |
| mitotic nuclear division (GO:0007067)                                     | 243  | 105 | 62.72  | + | 1.67 | 4.83E-03 |
| protein modification by small protein conjugation or removal (GO:0070647) | 676  | 292 | 174.48 | + | 1.67 | 7.92E-13 |
| regulation of growth (GO:0040008)                                         | 639  | 276 | 164.93 | + | 1.67 | 5.63E-12 |
| regulation of actin filament-based process (GO:0032970)                   | 322  | 139 | 83.11  | + | 1.67 | 8.69E-05 |
| regulation of apoptotic signaling pathway (GO:2001233)                    | 380  | 164 | 98.08  | + | 1.67 | 4.45E-06 |
| carboxylic acid transport (GO:0046942)                                    | 211  | 91  | 54.46  | + | 1.67 | 2.79E-02 |
| protein ubiquitination (GO:0016567)                                       | 515  | 222 | 132.92 | + | 1.67 | 4.73E-09 |
| protein modification by small protein conjugation (GO:0032446)            | 555  | 239 | 143.25 | + | 1.67 | 6.80E-10 |

|                                                                         |      |      |        |   |      |          |
|-------------------------------------------------------------------------|------|------|--------|---|------|----------|
| negative regulation of cell motility (GO:2000146)                       | 230  | 99   | 59.36  | + | 1.67 | 1.16E-02 |
| response to light stimulus (GO:0009416)                                 | 300  | 129  | 77.43  | + | 1.67 | 3.54E-04 |
| regulation of cellular component organization (GO:0051128)              | 2292 | 985  | 591.58 | + | 1.67 | 9.07E-52 |
| regulation of cellular protein localization (GO:1903827)                | 545  | 234  | 140.67 | + | 1.66 | 1.65E-09 |
| regulation of MAP kinase activity (GO:0043405)                          | 301  | 129  | 77.69  | + | 1.66 | 4.23E-04 |
| positive regulation of proteolysis (GO:0045862)                         | 294  | 126  | 75.88  | + | 1.66 | 5.99E-04 |
| cellular response to peptide hormone stimulus (GO:0071375)              | 259  | 111  | 66.85  | + | 1.66 | 3.44E-03 |
| glycoprotein biosynthetic process (GO:0009101)                          | 245  | 105  | 63.24  | + | 1.66 | 6.92E-03 |
| proteolysis involved in cellular protein catabolic process (GO:0051603) | 467  | 200  | 120.54 | + | 1.66 | 1.13E-07 |
| organic substance transport (GO:0071702)                                | 1547 | 662  | 399.29 | + | 1.66 | 3.83E-32 |
| negative regulation of organelle organization (GO:0010639)              | 300  | 128  | 77.43  | + | 1.65 | 6.01E-04 |
| cellular response to peptide (GO:1901653)                               | 286  | 122  | 73.82  | + | 1.65 | 1.21E-03 |
| macromolecule localization (GO:0033036)                                 | 1795 | 764  | 463.30 | + | 1.65 | 3.75E-37 |
| response to drug (GO:0042493)                                           | 614  | 261  | 158.48 | + | 1.65 | 1.96E-10 |
| positive regulation of apoptotic process (GO:0043065)                   | 584  | 248  | 150.73 | + | 1.65 | 9.64E-10 |
| regulation of mitotic cell cycle (GO:0007346)                           | 391  | 166  | 100.92 | + | 1.64 | 1.08E-05 |
| organophosphate metabolic process (GO:0019637)                          | 703  | 298  | 181.45 | + | 1.64 | 3.87E-12 |
| cell morphogenesis (GO:0000902)                                         | 880  | 373  | 227.13 | + | 1.64 | 6.83E-16 |
| protein localization to organelle (GO:0033365)                          | 477  | 202  | 123.12 | + | 1.64 | 2.27E-07 |
| positive regulation of programmed cell death (GO:0043068)               | 588  | 249  | 151.77 | + | 1.64 | 1.14E-09 |
| enzyme linked receptor protein signaling pathway (GO:0007167)           | 520  | 220  | 134.21 | + | 1.64 | 3.27E-08 |
| regulation of metal ion transport (GO:0010959)                          | 360  | 152  | 92.92  | + | 1.64 | 7.34E-05 |
| response to hypoxia (GO:0001666)                                        | 375  | 158  | 96.79  | + | 1.63 | 4.32E-05 |
| positive regulation of cell death (GO:0010942)                          | 629  | 265  | 162.35 | + | 1.63 | 3.24E-10 |
| protein catabolic process (GO:0030163)                                  | 513  | 216  | 132.41 | + | 1.63 | 7.77E-08 |
| vesicle-mediated transport (GO:0016192)                                 | 960  | 404  | 247.78 | + | 1.63 | 6.01E-17 |
| cellular response to hormone stimulus (GO:0032870)                      | 561  | 236  | 144.80 | + | 1.63 | 9.32E-09 |
| positive regulation of cellular component organization (GO:0051130)     | 1203 | 506  | 310.50 | + | 1.63 | 5.19E-22 |
| regulation of kinase activity (GO:0043549)                              | 718  | 302  | 185.32 | + | 1.63 | 6.35E-12 |
| cellular protein modification process (GO:0006464)                      | 2383 | 1002 | 615.06 | + | 1.63 | 1.15E-48 |
| protein modification process (GO:0036211)                               | 2383 | 1002 | 615.06 | + | 1.63 | 1.15E-48 |
| regulation of cell differentiation (GO:0045595)                         | 1651 | 694  | 426.13 | + | 1.63 | 1.15E-31 |
| regulation of protein kinase activity (GO:0045859)                      | 659  | 277  | 170.09 | + | 1.63 | 1.10E-10 |
| muscle cell differentiation (GO:0042692)                                | 269  | 113  | 69.43  | + | 1.63 | 6.87E-03 |
| aging (GO:0007568)                                                      | 398  | 167  | 102.73 | + | 1.63 | 2.12E-05 |
| angiogenesis (GO:0001525)                                               | 258  | 108  | 66.59  | + | 1.62 | 1.38E-02 |
| macromolecule modification (GO:0043412)                                 | 2576 | 1077 | 664.88 | + | 1.62 | 7.42E-52 |
| cellular macromolecule catabolic process (GO:0044265)                   | 627  | 262  | 161.83 | + | 1.62 | 1.07E-09 |



|                                                                   |      |     |        |   |      |          |
|-------------------------------------------------------------------|------|-----|--------|---|------|----------|
| single-organism intracellular transport (GO:1902582)              | 371  | 155 | 95.76  | + | 1.62 | 1.01E-04 |
| regulation of ion transport (GO:0043269)                          | 596  | 249 | 153.83 | + | 1.62 | 4.42E-09 |
| positive regulation of GTPase activity (GO:0043547)               | 443  | 185 | 114.34 | + | 1.62 | 4.31E-06 |
| response to decreased oxygen levels (GO:0036293)                  | 386  | 161 | 99.63  | + | 1.62 | 5.96E-05 |
| carbohydrate metabolic process (GO:0005975)                       | 559  | 233 | 144.28 | + | 1.61 | 3.06E-08 |
| anion transport (GO:0006820)                                      | 360  | 150 | 92.92  | + | 1.61 | 2.03E-04 |
| epithelial tube morphogenesis (GO:0060562)                        | 348  | 145 | 89.82  | + | 1.61 | 3.43E-04 |
| apoptotic process (GO:0006915)                                    | 675  | 281 | 174.22 | + | 1.61 | 2.09E-10 |
| response to oxygen levels (GO:0070482)                            | 418  | 174 | 107.89 | + | 1.61 | 1.73E-05 |
| cellular component morphogenesis (GO:0032989)                     | 966  | 402 | 249.33 | + | 1.61 | 4.63E-16 |
| programmed cell death (GO:0012501)                                | 702  | 292 | 181.19 | + | 1.61 | 7.09E-11 |
| peptidyl-amino acid modification (GO:0018193)                     | 703  | 292 | 181.45 | + | 1.61 | 8.36E-11 |
| lipid biosynthetic process (GO:0008610)                           | 383  | 159 | 98.85  | + | 1.61 | 9.90E-05 |
| chemotaxis (GO:0006935)                                           | 410  | 170 | 105.82 | + | 1.61 | 3.43E-05 |
| response to peptide hormone (GO:0043434)                          | 454  | 188 | 117.18 | + | 1.60 | 5.85E-06 |
| negative regulation of developmental process (GO:0051093)         | 884  | 366 | 228.17 | + | 1.60 | 4.91E-14 |
| regulation of protein complex assembly (GO:0043254)               | 343  | 142 | 88.53  | + | 1.60 | 6.74E-04 |
| regulation of transport (GO:0051049)                              | 1813 | 750 | 467.94 | + | 1.60 | 1.73E-32 |
| membrane organization (GO:0061024)                                | 747  | 309 | 192.80 | + | 1.60 | 2.27E-11 |
| regulation of intracellular protein transport (GO:0033157)        | 370  | 153 | 95.50  | + | 1.60 | 2.34E-04 |
| regulation of intracellular transport (GO:0032386)                | 467  | 193 | 120.54 | + | 1.60 | 4.06E-06 |
| cytoskeleton organization (GO:0007010)                            | 859  | 355 | 221.71 | + | 1.60 | 2.04E-13 |
| morphogenesis of an epithelium (GO:0002009)                       | 489  | 202 | 126.21 | + | 1.60 | 1.67E-06 |
| regulation of transferase activity (GO:0051338)                   | 809  | 334 | 208.81 | + | 1.60 | 2.12E-12 |
| taxis (GO:0042330)                                                | 412  | 170 | 106.34 | + | 1.60 | 4.74E-05 |
| positive regulation of hydrolase activity (GO:0051345)            | 732  | 302 | 188.93 | + | 1.60 | 6.45E-11 |
| organophosphate biosynthetic process (GO:0090407)                 | 337  | 139 | 86.98  | + | 1.60 | 1.12E-03 |
| negative regulation of transport (GO:0051051)                     | 490  | 202 | 126.47 | + | 1.60 | 1.97E-06 |
| tube morphogenesis (GO:0035239)                                   | 393  | 162 | 101.44 | + | 1.60 | 1.14E-04 |
| positive regulation of cellular protein localization (GO:1903829) | 343  | 141 | 88.53  | + | 1.59 | 1.10E-03 |
| cell death (GO:0008219)                                           | 745  | 306 | 192.29 | + | 1.59 | 7.24E-11 |
| cell-cell signaling (GO:0007267)                                  | 704  | 289 | 181.71 | + | 1.59 | 4.34E-10 |
| positive regulation of intracellular transport (GO:0032388)       | 290  | 119 | 74.85  | + | 1.59 | 1.08E-02 |
| small molecule biosynthetic process (GO:0044283)                  | 334  | 137 | 86.21  | + | 1.59 | 1.85E-03 |
| regulation of lipid metabolic process (GO:0019216)                | 300  | 123 | 77.43  | + | 1.59 | 7.56E-03 |
| positive regulation of cellular component biogenesis (GO:0044089) | 405  | 166 | 104.53 | + | 1.59 | 1.09E-04 |
| posttranscriptional regulation of gene expression (GO:0010608)    | 371  | 152 | 95.76  | + | 1.59 | 4.48E-04 |
| urogenital system development (GO:0001655)                        | 354  | 145 | 91.37  | + | 1.59 | 9.05E-04 |

|                                                                        |      |      |        |   |      |          |
|------------------------------------------------------------------------|------|------|--------|---|------|----------|
| response to peptide (GO:1901652)                                       | 504  | 206  | 130.09 | + | 1.58 | 2.59E-06 |
| ribose phosphate metabolic process (GO:0019693)                        | 311  | 127  | 80.27  | + | 1.58 | 6.19E-03 |
| muscle structure development (GO:0061061)                              | 458  | 187  | 118.21 | + | 1.58 | 1.81E-05 |
| negative regulation of cell communication (GO:0010648)                 | 1159 | 473  | 299.14 | + | 1.58 | 7.15E-18 |
| positive regulation of cell cycle (GO:0045787)                         | 299  | 122  | 77.17  | + | 1.58 | 1.05E-02 |
| nitrogen compound transport (GO:0071705)                               | 402  | 164  | 103.76 | + | 1.58 | 1.79E-04 |
| negative regulation of signaling (GO:0023057)                          | 1162 | 474  | 299.92 | + | 1.58 | 7.03E-18 |
| negative regulation of cellular protein metabolic process (GO:0032269) | 939  | 383  | 242.36 | + | 1.58 | 7.54E-14 |
| negative regulation of cell death (GO:0060548)                         | 967  | 394  | 249.59 | + | 1.58 | 2.92E-14 |
| developmental growth (GO:0048589)                                      | 410  | 167  | 105.82 | + | 1.58 | 1.48E-04 |
| response to hormone (GO:0009725)                                       | 965  | 393  | 249.07 | + | 1.58 | 3.47E-14 |
| regulation of cell cycle (GO:0051726)                                  | 811  | 330  | 209.32 | + | 1.58 | 2.06E-11 |
| regulation of localization (GO:0032879)                                | 2487 | 1011 | 641.91 | + | 1.57 | 5.99E-43 |
| response to mechanical stimulus (GO:0009612)                           | 278  | 113  | 71.75  | + | 1.57 | 2.96E-02 |
| single-organism organelle organization (GO:1902589)                    | 1369 | 556  | 353.35 | + | 1.57 | 3.63E-21 |
| response to organonitrogen compound (GO:0010243)                       | 993  | 403  | 256.30 | + | 1.57 | 2.18E-14 |
| regulation of protein localization (GO:0032880)                        | 971  | 394  | 250.62 | + | 1.57 | 5.47E-14 |
| regulation of cellular response to stress (GO:0080135)                 | 530  | 215  | 136.80 | + | 1.57 | 1.99E-06 |
| negative regulation of signal transduction (GO:0009968)                | 1041 | 422  | 268.69 | + | 1.57 | 3.97E-15 |
| regulation of intracellular signal transduction (GO:1902531)           | 1513 | 613  | 390.51 | + | 1.57 | 1.74E-23 |
| carbohydrate derivative biosynthetic process (GO:1901137)              | 469  | 190  | 121.05 | + | 1.57 | 2.37E-05 |
| cell development (GO:0048468)                                          | 1575 | 638  | 406.52 | + | 1.57 | 1.36E-24 |
| response to steroid hormone (GO:0048545)                               | 457  | 185  | 117.95 | + | 1.57 | 4.02E-05 |
| sulfur compound metabolic process (GO:0006790)                         | 272  | 110  | 70.20  | + | 1.57 | 4.89E-02 |
| regulation of anatomical structure morphogenesis (GO:0022603)          | 1017 | 411  | 262.49 | + | 1.57 | 1.92E-14 |
| regulation of MAPK cascade (GO:0043408)                                | 681  | 275  | 175.77 | + | 1.56 | 1.01E-08 |
| negative regulation of cell proliferation (GO:0008285)                 | 629  | 254  | 162.35 | + | 1.56 | 7.36E-08 |
| positive regulation of transferase activity (GO:0051347)               | 503  | 203  | 129.83 | + | 1.56 | 9.27E-06 |
| organic hydroxy compound metabolic process (GO:1901615)                | 300  | 121  | 77.43  | + | 1.56 | 1.97E-02 |
| regulation of multicellular organismal development (GO:2000026)        | 1784 | 719  | 460.46 | + | 1.56 | 1.13E-27 |
| regulation of organelle organization (GO:0033043)                      | 1099 | 442  | 283.66 | + | 1.56 | 2.07E-15 |
| regulation of cell death (GO:0010941)                                  | 1550 | 623  | 400.06 | + | 1.56 | 4.25E-23 |
| renal system development (GO:0072001)                                  | 311  | 125  | 80.27  | + | 1.56 | 1.60E-02 |
| regulation of signaling (GO:0023051)                                   | 2786 | 1118 | 719.08 | + | 1.55 | 7.14E-46 |
| cellular catabolic process (GO:0044248)                                | 1095 | 439  | 282.63 | + | 1.55 | 4.67E-15 |
| regulation of cell communication (GO:0010646)                          | 2764 | 1108 | 713.40 | + | 1.55 | 3.58E-45 |
| negative regulation of protein metabolic process (GO:0051248)          | 998  | 400  | 257.59 | + | 1.55 | 1.96E-13 |
| cellular response to abiotic stimulus (GO:0071214)                     | 307  | 123  | 79.24  | + | 1.55 | 2.23E-02 |

|                                                                                   |      |      |        |   |      |          |
|-----------------------------------------------------------------------------------|------|------|--------|---|------|----------|
| negative regulation of cell cycle (GO:0045786)                                    | 327  | 131  | 84.40  | + | 1.55 | 1.09E-02 |
| cofactor metabolic process (GO:0051186)                                           | 327  | 131  | 84.40  | + | 1.55 | 1.09E-02 |
| microtubule cytoskeleton organization (GO:0000226)                                | 362  | 145  | 93.43  | + | 1.55 | 3.09E-03 |
| positive regulation of kinase activity (GO:0033674)                               | 437  | 175  | 112.79 | + | 1.55 | 2.10E-04 |
| macromolecule catabolic process (GO:0009057)                                      | 713  | 285  | 184.03 | + | 1.55 | 1.16E-08 |
| regulation of developmental process (GO:0050793)                                  | 2362 | 944  | 609.64 | + | 1.55 | 8.53E-37 |
| cellular response to growth factor stimulus (GO:0071363)                          | 463  | 185  | 119.50 | + | 1.55 | 9.91E-05 |
| positive regulation of protein kinase activity (GO:0045860)                       | 403  | 161  | 104.02 | + | 1.55 | 8.55E-04 |
| regulation of cellular amide metabolic process (GO:0034248)                       | 343  | 137  | 88.53  | + | 1.55 | 7.36E-03 |
| tube development (GO:0035295)                                                     | 681  | 272  | 175.77 | + | 1.55 | 4.10E-08 |
| positive regulation of catalytic activity (GO:0043085)                            | 1252 | 500  | 323.15 | + | 1.55 | 2.81E-17 |
| cellular lipid metabolic process (GO:0044255)                                     | 749  | 299  | 193.32 | + | 1.55 | 3.76E-09 |
| positive regulation of transport (GO:0051050)                                     | 990  | 395  | 255.52 | + | 1.55 | 6.13E-13 |
| negative regulation of transcription from RNA polymerase II promoter (GO:0000122) | 757  | 302  | 195.39 | + | 1.55 | 3.07E-09 |
| cellular response to organic cyclic compound (GO:0071407)                         | 549  | 219  | 141.70 | + | 1.55 | 5.37E-06 |
| growth (GO:0040007)                                                               | 484  | 193  | 124.92 | + | 1.54 | 5.59E-05 |
| single-organism biosynthetic process (GO:0044711)                                 | 841  | 335  | 217.07 | + | 1.54 | 1.85E-10 |
| ribonucleotide metabolic process (GO:0009259)                                     | 299  | 119  | 77.17  | + | 1.54 | 4.29E-02 |
| regulation of protein targeting (GO:1903533)                                      | 299  | 119  | 77.17  | + | 1.54 | 4.29E-02 |
| regulation of molecular function (GO:0065009)                                     | 2574 | 1024 | 664.36 | + | 1.54 | 9.73E-40 |
| tissue morphogenesis (GO:0048729)                                                 | 596  | 237  | 153.83 | + | 1.54 | 1.42E-06 |
| cellular response to organonitrogen compound (GO:0071417)                         | 498  | 198  | 128.54 | + | 1.54 | 4.44E-05 |
| positive regulation of molecular function (GO:0044093)                            | 1557 | 619  | 401.87 | + | 1.54 | 8.44E-22 |
| regulation of cell cycle process (GO:0010564)                                     | 476  | 189  | 122.86 | + | 1.54 | 1.07E-04 |
| negative regulation of apoptotic process (GO:0043066)                             | 864  | 343  | 223.00 | + | 1.54 | 1.38E-10 |
| regulation of cell migration (GO:0030334)                                         | 711  | 282  | 183.51 | + | 1.54 | 3.43E-08 |
| response to oxidative stress (GO:0006979)                                         | 411  | 163  | 106.08 | + | 1.54 | 1.11E-03 |
| regulation of secretion by cell (GO:1903530)                                      | 694  | 275  | 179.13 | + | 1.54 | 6.98E-08 |
| nucleotide metabolic process (GO:0009117)                                         | 409  | 162  | 105.57 | + | 1.53 | 1.30E-03 |
| blood vessel development (GO:0001568)                                             | 452  | 179  | 116.66 | + | 1.53 | 3.05E-04 |
| covalent chromatin modification (GO:0016569)                                      | 379  | 150  | 97.82  | + | 1.53 | 3.83E-03 |
| positive regulation of cell differentiation (GO:0045597)                          | 940  | 372  | 242.62 | + | 1.53 | 1.57E-11 |
| negative regulation of programmed cell death (GO:0043069)                         | 878  | 347  | 226.62 | + | 1.53 | 1.70E-10 |
| regulation of catalytic activity (GO:0050790)                                     | 2047 | 809  | 528.34 | + | 1.53 | 4.01E-29 |
| response to abiotic stimulus (GO:0009628)                                         | 1245 | 492  | 321.34 | + | 1.53 | 4.14E-16 |
| regulation of protein modification process (GO:0031399)                           | 1612 | 637  | 416.07 | + | 1.53 | 6.38E-22 |
| positive regulation of secretion by cell (GO:1903532)                             | 390  | 154  | 100.66 | + | 1.53 | 3.09E-03 |
| positive regulation of organelle organization (GO:0010638)                        | 580  | 229  | 149.70 | + | 1.53 | 5.21E-06 |

|                                                                                   |      |      |         |   |      |          |
|-----------------------------------------------------------------------------------|------|------|---------|---|------|----------|
| nucleoside phosphate metabolic process (GO:0006753)                               | 418  | 165  | 107.89  | + | 1.53 | 1.24E-03 |
| response to nitrogen compound (GO:1901698)                                        | 1092 | 431  | 281.85  | + | 1.53 | 1.23E-13 |
| regulation of phosphorylation (GO:0042325)                                        | 1399 | 552  | 361.09  | + | 1.53 | 2.36E-18 |
| regulation of apoptotic process (GO:0042981)                                      | 1412 | 557  | 364.44  | + | 1.53 | 1.57E-18 |
| response to endogenous stimulus (GO:0009719)                                      | 1620 | 639  | 418.13  | + | 1.53 | 8.16E-22 |
| response to radiation (GO:0009314)                                                | 477  | 188  | 123.12  | + | 1.53 | 1.94E-04 |
| metal ion transport (GO:0030001)                                                  | 543  | 214  | 140.15  | + | 1.53 | 2.16E-05 |
| establishment of localization (GO:0051234)                                        | 3456 | 1362 | 892.01  | + | 1.53 | 5.41E-54 |
| regulation of programmed cell death (GO:0043067)                                  | 1427 | 562  | 368.32  | + | 1.53 | 1.39E-18 |
| response to growth factor (GO:0070848)                                            | 498  | 196  | 128.54  | + | 1.52 | 1.09E-04 |
| negative regulation of cellular process (GO:0048523)                              | 4088 | 1608 | 1055.13 | + | 1.52 | 4.73E-66 |
| regulation of signal transduction (GO:0009966)                                    | 2441 | 960  | 630.03  | + | 1.52 | 6.38E-35 |
| cell migration (GO:0016477)                                                       | 712  | 280  | 183.77  | + | 1.52 | 9.74E-08 |
| cellular response to endogenous stimulus (GO:0071495)                             | 1038 | 408  | 267.91  | + | 1.52 | 1.75E-12 |
| transport (GO:0006810)                                                            | 3305 | 1299 | 853.04  | + | 1.52 | 2.65E-50 |
| carbohydrate derivative metabolic process (GO:1901135)                            | 828  | 325  | 213.71  | + | 1.52 | 2.63E-09 |
| positive regulation of transcription from RNA polymerase II promoter (GO:0045944) | 1050 | 412  | 271.01  | + | 1.52 | 1.60E-12 |
| regulation of cellular component movement (GO:0051270)                            | 813  | 319  | 209.84  | + | 1.52 | 4.55E-09 |
| system development (GO:0048731)                                                   | 4152 | 1629 | 1071.65 | + | 1.52 | 2.07E-66 |
| multicellular organism development (GO:0007275)                                   | 4547 | 1783 | 1173.60 | + | 1.52 | 1.57E-74 |
| protein oligomerization (GO:0051259)                                              | 482  | 189  | 124.41  | + | 1.52 | 2.53E-04 |
| negative regulation of multicellular organismal process (GO:0051241)              | 1064 | 417  | 274.62  | + | 1.52 | 1.24E-12 |
| monovalent inorganic cation transport (GO:0015672)                                | 370  | 145  | 95.50   | + | 1.52 | 9.87E-03 |
| locomotion (GO:0040011)                                                           | 980  | 384  | 252.94  | + | 1.52 | 2.16E-11 |
| RNA biosynthetic process (GO:0032774)                                             | 1215 | 476  | 313.60  | + | 1.52 | 7.99E-15 |
| regulation of secretion (GO:0051046)                                              | 743  | 291  | 191.77  | + | 1.52 | 5.87E-08 |
| negative regulation of catalytic activity (GO:0043086)                            | 751  | 294  | 193.84  | + | 1.52 | 4.79E-08 |
| blood vessel morphogenesis (GO:0048514)                                           | 350  | 137  | 90.34   | + | 1.52 | 2.02E-02 |
| transcription, DNA-templated (GO:0006351)                                         | 1201 | 469  | 309.98  | + | 1.51 | 2.54E-14 |
| single-organism localization (GO:1902578)                                         | 2021 | 789  | 521.63  | + | 1.51 | 1.09E-26 |
| positive regulation of cellular protein metabolic process (GO:0032270)            | 1348 | 526  | 347.93  | + | 1.51 | 2.15E-16 |
| nucleic acid-templated transcription (GO:0097659)                                 | 1202 | 469  | 310.24  | + | 1.51 | 2.92E-14 |
| regulation of locomotion (GO:0040012)                                             | 787  | 307  | 203.13  | + | 1.51 | 2.39E-08 |
| organic substance catabolic process (GO:1901575)                                  | 1264 | 493  | 326.24  | + | 1.51 | 4.01E-15 |
| inorganic cation transmembrane transport (GO:0098662)                             | 467  | 182  | 120.54  | + | 1.51 | 6.72E-04 |
| regulation of phosphate metabolic process (GO:0019220)                            | 1622 | 632  | 418.65  | + | 1.51 | 2.73E-20 |
| localization (GO:0051179)                                                         | 4363 | 1700 | 1126.11 | + | 1.51 | 4.63E-68 |
| vasculature development (GO:0001944)                                              | 480  | 187  | 123.89  | + | 1.51 | 4.60E-04 |

|                                                                                 |      |      |         |   |      |          |
|---------------------------------------------------------------------------------|------|------|---------|---|------|----------|
| regulation of phosphorus metabolic process (GO:0051174)                         | 1623 | 632  | 418.90  | + | 1.51 | 3.15E-20 |
| response to metal ion (GO:0010038)                                              | 434  | 169  | 112.02  | + | 1.51 | 2.01E-03 |
| negative regulation of response to stimulus (GO:0048585)                        | 1346 | 524  | 347.41  | + | 1.51 | 3.97E-16 |
| positive regulation of secretion (GO:0051047)                                   | 419  | 163  | 108.15  | + | 1.51 | 3.43E-03 |
| regulation of homeostatic process (GO:0032844)                                  | 473  | 184  | 122.08  | + | 1.51 | 6.45E-04 |
| cellular response to lipid (GO:0071396)                                         | 522  | 203  | 134.73  | + | 1.51 | 1.44E-04 |
| regulation of hydrolase activity (GO:0051336)                                   | 1184 | 460  | 305.60  | + | 1.51 | 1.28E-13 |
| ion transport (GO:0006811)                                                      | 1064 | 413  | 274.62  | + | 1.50 | 7.29E-12 |
| regulation of biological quality (GO:0065008)                                   | 3322 | 1289 | 857.43  | + | 1.50 | 5.57E-47 |
| regulation of protein phosphorylation (GO:0001932)                              | 1297 | 503  | 334.76  | + | 1.50 | 4.76E-15 |
| cation homeostasis (GO:0055080)                                                 | 555  | 215  | 143.25  | + | 1.50 | 7.41E-05 |
| negative regulation of biological process (GO:0048519)                          | 4402 | 1705 | 1136.18 | + | 1.50 | 1.68E-66 |
| response to acid chemical (GO:0001101)                                          | 403  | 156  | 104.02  | + | 1.50 | 7.88E-03 |
| regulation of establishment of protein localization (GO:0070201)                | 819  | 317  | 211.39  | + | 1.50 | 2.51E-08 |
| single-multicellular organism process (GO:0044707)                              | 5153 | 1994 | 1330.02 | + | 1.50 | 1.28E-81 |
| positive regulation of developmental process (GO:0051094)                       | 1300 | 503  | 335.54  | + | 1.50 | 7.20E-15 |
| regulation of cell motility (GO:2000145)                                        | 750  | 290  | 193.58  | + | 1.50 | 2.38E-07 |
| regulation of protein transport (GO:0051223)                                    | 763  | 295  | 196.93  | + | 1.50 | 1.62E-07 |
| cell differentiation (GO:0030154)                                               | 3267 | 1263 | 843.23  | + | 1.50 | 5.03E-45 |
| nucleobase-containing small molecule metabolic process (GO:0055086)             | 471  | 182  | 121.57  | + | 1.50 | 1.16E-03 |
| catabolic process (GO:0009056)                                                  | 1326 | 512  | 342.25  | + | 1.50 | 4.97E-15 |
| regulation of cellular protein metabolic process (GO:0032268)                   | 2291 | 884  | 591.32  | + | 1.49 | 6.76E-29 |
| cation transmembrane transport (GO:0098655)                                     | 529  | 204  | 136.54  | + | 1.49 | 2.43E-04 |
| negative regulation of cellular macromolecule biosynthetic process (GO:2000113) | 1250 | 482  | 322.63  | + | 1.49 | 7.34E-14 |
| negative regulation of molecular function (GO:0044092)                          | 1020 | 393  | 263.27  | + | 1.49 | 1.05E-10 |
| positive regulation of protein metabolic process (GO:0051247)                   | 1438 | 554  | 371.16  | + | 1.49 | 2.39E-16 |
| chemical homeostasis (GO:0048878)                                               | 927  | 357  | 239.26  | + | 1.49 | 1.92E-09 |
| cellular response to nitrogen compound (GO:1901699)                             | 574  | 221  | 148.15  | + | 1.49 | 7.41E-05 |
| positive regulation of nucleic acid-templated transcription (GO:1903508)        | 1328 | 511  | 342.76  | + | 1.49 | 1.01E-14 |
| positive regulation of transcription, DNA-templated (GO:0045893)                | 1328 | 511  | 342.76  | + | 1.49 | 1.01E-14 |
| positive regulation of RNA biosynthetic process (GO:1902680)                    | 1331 | 512  | 343.54  | + | 1.49 | 9.82E-15 |
| positive regulation of cellular metabolic process (GO:0031325)                  | 2727 | 1049 | 703.85  | + | 1.49 | 5.22E-35 |
| positive regulation of intracellular signal transduction (GO:1902533)           | 884  | 340  | 228.17  | + | 1.49 | 8.48E-09 |
| in utero embryonic development (GO:0001701)                                     | 429  | 165  | 110.73  | + | 1.49 | 5.65E-03 |
| response to organic cyclic compound (GO:0014070)                                | 1209 | 465  | 312.05  | + | 1.49 | 4.43E-13 |
| divalent inorganic cation homeostasis (GO:0072507)                              | 372  | 143  | 96.02   | + | 1.49 | 3.08E-02 |
| positive regulation of cellular process (GO:0048522)                            | 4627 | 1778 | 1194.25 | + | 1.49 | 9.43E-68 |
| single-organism transport (GO:0044765)                                          | 1801 | 692  | 464.85  | + | 1.49 | 4.37E-21 |

|                                                                          |      |      |         |   |      |          |
|--------------------------------------------------------------------------|------|------|---------|---|------|----------|
| cellular chemical homeostasis (GO:0055082)                               | 617  | 237  | 159.25  | + | 1.49 | 2.63E-05 |
| protein complex subunit organization (GO:0071822)                        | 1034 | 397  | 266.88  | + | 1.49 | 1.24E-10 |
| organelle organization (GO:0006996)                                      | 2821 | 1082 | 728.11  | + | 1.49 | 7.65E-36 |
| positive regulation of signaling (GO:0023056)                            | 1468 | 563  | 378.90  | + | 1.49 | 2.80E-16 |
| mitochondrion organization (GO:0007005)                                  | 480  | 184  | 123.89  | + | 1.49 | 1.65E-03 |
| negative regulation of macromolecule biosynthetic process (GO:0010558)   | 1315 | 504  | 339.41  | + | 1.48 | 3.58E-14 |
| negative regulation of nitrogen compound metabolic process (GO:0051172)  | 1422 | 545  | 367.03  | + | 1.48 | 1.36E-15 |
| movement of cell or subcellular component (GO:0006928)                   | 1122 | 430  | 289.59  | + | 1.48 | 1.23E-11 |
| cellular developmental process (GO:0048869)                              | 3473 | 1331 | 896.40  | + | 1.48 | 4.11E-46 |
| single-organism catabolic process (GO:0044712)                           | 608  | 233  | 156.93  | + | 1.48 | 4.30E-05 |
| cellular response to stress (GO:0033554)                                 | 1412 | 541  | 364.44  | + | 1.48 | 1.98E-15 |
| regulation of protein metabolic process (GO:0051246)                     | 2436 | 933  | 628.74  | + | 1.48 | 9.94E-30 |
| positive regulation of macromolecule metabolic process (GO:0010604)      | 2718 | 1041 | 701.53  | + | 1.48 | 5.93E-34 |
| regulation of multicellular organismal process (GO:0051239)              | 2658 | 1018 | 686.04  | + | 1.48 | 4.86E-33 |
| positive regulation of biological process (GO:0048518)                   | 5076 | 1944 | 1310.14 | + | 1.48 | 3.45E-75 |
| positive regulation of protein modification process (GO:0031401)         | 1068 | 409  | 275.66  | + | 1.48 | 7.01E-11 |
| negative regulation of biosynthetic process (GO:0009890)                 | 1405 | 538  | 362.64  | + | 1.48 | 2.82E-15 |
| regulation of transcription from RNA polymerase II promoter (GO:0006357) | 1771 | 678  | 457.10  | + | 1.48 | 3.42E-20 |
| negative regulation of cellular biosynthetic process (GO:0031327)        | 1374 | 526  | 354.64  | + | 1.48 | 7.68E-15 |
| positive regulation of cell communication (GO:0010647)                   | 1461 | 559  | 377.09  | + | 1.48 | 6.14E-16 |
| positive regulation of RNA metabolic process (GO:0051254)                | 1383 | 529  | 356.96  | + | 1.48 | 7.07E-15 |
| anatomical structure morphogenesis (GO:0009653)                          | 2139 | 818  | 552.09  | + | 1.48 | 3.58E-25 |
| ion transmembrane transport (GO:0034220)                                 | 709  | 271  | 183.00  | + | 1.48 | 3.13E-06 |
| mRNA metabolic process (GO:0016071)                                      | 398  | 152  | 102.73  | + | 1.48 | 2.19E-02 |
| positive regulation of MAPK cascade (GO:0043410)                         | 474  | 181  | 122.34  | + | 1.48 | 2.63E-03 |
| inorganic ion homeostasis (GO:0098771)                                   | 571  | 218  | 147.38  | + | 1.48 | 1.75E-04 |
| negative regulation of nucleic acid-templated transcription (GO:1903507) | 1095 | 418  | 282.63  | + | 1.48 | 5.54E-11 |
| cell proliferation (GO:0008283)                                          | 566  | 216  | 146.09  | + | 1.48 | 2.09E-04 |
| ion homeostasis (GO:0050801)                                             | 577  | 220  | 148.93  | + | 1.48 | 1.67E-04 |
| eye development (GO:0001654)                                             | 383  | 146  | 98.85   | + | 1.48 | 3.74E-02 |
| positive regulation of macromolecule biosynthetic process (GO:0010557)   | 1564 | 596  | 403.68  | + | 1.48 | 7.30E-17 |
| regulation of system process (GO:0044057)                                | 496  | 189  | 128.02  | + | 1.48 | 1.67E-03 |
| nucleobase-containing compound biosynthetic process (GO:0034654)         | 1475 | 562  | 380.71  | + | 1.48 | 1.10E-15 |
| positive regulation of nitrogen compound metabolic process (GO:0051173)  | 1727 | 658  | 445.75  | + | 1.48 | 5.39E-19 |
| negative regulation of cellular metabolic process (GO:0031324)           | 2237 | 852  | 577.38  | + | 1.48 | 6.75E-26 |
| negative regulation of macromolecule metabolic process (GO:0010605)      | 2186 | 832  | 564.22  | + | 1.47 | 4.48E-25 |
| negative regulation of gene expression (GO:0010629)                      | 1390 | 529  | 358.77  | + | 1.47 | 1.79E-14 |
| anatomical structure development (GO:0048856)                            | 4940 | 1880 | 1275.04 | + | 1.47 | 9.54E-70 |

|                                                                                      |      |      |         |   |      |          |
|--------------------------------------------------------------------------------------|------|------|---------|---|------|----------|
| single-organism developmental process (GO:0044767)                                   | 5217 | 1985 | 1346.53 | + | 1.47 | 5.06E-75 |
| positive regulation of metabolic process (GO:0009893)                                | 2913 | 1108 | 751.86  | + | 1.47 | 2.08E-35 |
| aromatic compound biosynthetic process (GO:0019438)                                  | 1546 | 588  | 399.03  | + | 1.47 | 2.04E-16 |
| negative regulation of transcription, DNA-templated (GO:0045892)                     | 1076 | 409  | 277.72  | + | 1.47 | 2.00E-10 |
| positive regulation of cellular biosynthetic process (GO:0031328)                    | 1689 | 642  | 435.94  | + | 1.47 | 3.31E-18 |
| developmental process (GO:0032502)                                                   | 5248 | 1994 | 1354.54 | + | 1.47 | 5.47E-75 |
| heterocycle biosynthetic process (GO:0018130)                                        | 1532 | 582  | 395.42  | + | 1.47 | 4.13E-16 |
| positive regulation of signal transduction (GO:0009967)                              | 1306 | 496  | 337.09  | + | 1.47 | 3.24E-13 |
| negative regulation of metabolic process (GO:0009892)                                | 2389 | 907  | 616.61  | + | 1.47 | 1.76E-27 |
| lipid metabolic process (GO:0006629)                                                 | 959  | 364  | 247.52  | + | 1.47 | 6.81E-09 |
| positive regulation of biosynthetic process (GO:0009891)                             | 1726 | 655  | 445.49  | + | 1.47 | 1.71E-18 |
| cellular component organization (GO:0016043)                                         | 4702 | 1784 | 1213.61 | + | 1.47 | 4.49E-64 |
| positive regulation of cell migration (GO:0030335)                                   | 427  | 162  | 110.21  | + | 1.47 | 1.51E-02 |
| skeletal system development (GO:0001501)                                             | 456  | 173  | 117.70  | + | 1.47 | 6.92E-03 |
| negative regulation of RNA biosynthetic process (GO:1902679)                         | 1110 | 421  | 286.50  | + | 1.47 | 1.12E-10 |
| chordate embryonic development (GO:0043009)                                          | 699  | 265  | 180.42  | + | 1.47 | 1.02E-05 |
| metal ion homeostasis (GO:0055065)                                                   | 488  | 185  | 125.96  | + | 1.47 | 3.09E-03 |
| organic cyclic compound biosynthetic process (GO:1901362)                            | 1636 | 620  | 422.26  | + | 1.47 | 3.57E-17 |
| embryo development ending in birth or egg hatching (GO:0009792)                      | 708  | 268  | 182.74  | + | 1.47 | 9.47E-06 |
| positive regulation of nucleobase-containing compound metabolic process (GO:0045935) | 1617 | 611  | 417.36  | + | 1.46 | 1.33E-16 |
| circulatory system development (GO:0072359)                                          | 854  | 322  | 220.42  | + | 1.46 | 3.02E-07 |
| cardiovascular system development (GO:0072358)                                       | 854  | 322  | 220.42  | + | 1.46 | 3.02E-07 |
| negative regulation of RNA metabolic process (GO:0051253)                            | 1157 | 436  | 298.63  | + | 1.46 | 9.48E-11 |
| cellular protein metabolic process (GO:0044267)                                      | 3251 | 1225 | 839.10  | + | 1.46 | 3.14E-38 |
| anatomical structure formation involved in morphogenesis (GO:0048646)                | 990  | 373  | 255.52  | + | 1.46 | 8.88E-09 |
| protein complex assembly (GO:0006461)                                                | 921  | 347  | 237.71  | + | 1.46 | 5.62E-08 |
| protein complex biogenesis (GO:0070271)                                              | 921  | 347  | 237.71  | + | 1.46 | 5.62E-08 |
| cellular response to oxygen-containing compound (GO:1901701)                         | 937  | 353  | 241.84  | + | 1.46 | 3.71E-08 |
| cellular homeostasis (GO:0019725)                                                    | 733  | 276  | 189.19  | + | 1.46 | 8.71E-06 |
| regulation of proteolysis (GO:0030162)                                               | 656  | 247  | 169.32  | + | 1.46 | 6.53E-05 |
| gland development (GO:0048732)                                                       | 537  | 202  | 138.60  | + | 1.46 | 1.56E-03 |
| heart development (GO:0007507)                                                       | 553  | 208  | 142.73  | + | 1.46 | 1.04E-03 |
| positive regulation of locomotion (GO:0040017)                                       | 455  | 171  | 117.44  | + | 1.46 | 1.37E-02 |
| positive regulation of gene expression (GO:0010628)                                  | 1650 | 620  | 425.87  | + | 1.46 | 2.19E-16 |
| cellular cation homeostasis (GO:0030003)                                             | 482  | 181  | 124.41  | + | 1.45 | 7.27E-03 |
| positive regulation of phosphorylation (GO:0042327)                                  | 919  | 345  | 237.20  | + | 1.45 | 9.79E-08 |
| response to inorganic substance (GO:0010035)                                         | 629  | 236  | 162.35  | + | 1.45 | 1.84E-04 |
| response to oxygen-containing compound (GO:1901700)                                  | 1710 | 641  | 441.36  | + | 1.45 | 7.69E-17 |

|                                                                                      |      |      |         |   |      |          |
|--------------------------------------------------------------------------------------|------|------|---------|---|------|----------|
| cellular component organization or biogenesis (GO:0071840)                           | 4917 | 1843 | 1269.10 | + | 1.45 | 4.81E-63 |
| reproductive structure development (GO:0048608)                                      | 502  | 188  | 129.57  | + | 1.45 | 5.34E-03 |
| negative regulation of nucleobase-containing compound metabolic process (GO:0045934) | 1299 | 486  | 335.28  | + | 1.45 | 8.10E-12 |
| single-organism metabolic process (GO:0044710)                                       | 2872 | 1074 | 741.28  | + | 1.45 | 3.18E-31 |
| response to nutrient levels (GO:0031667)                                             | 567  | 212  | 146.35  | + | 1.45 | 1.20E-03 |
| positive regulation of phosphorus metabolic process (GO:0010562)                     | 1037 | 387  | 267.66  | + | 1.45 | 1.11E-08 |
| positive regulation of phosphate metabolic process (GO:0045937)                      | 1037 | 387  | 267.66  | + | 1.45 | 1.11E-08 |
| microtubule-based process (GO:0007017)                                               | 528  | 197  | 136.28  | + | 1.45 | 3.72E-03 |
| regulation of response to stimulus (GO:0048583)                                      | 3270 | 1220 | 844.00  | + | 1.45 | 3.95E-36 |
| reproductive system development (GO:0061458)                                         | 507  | 189  | 130.86  | + | 1.44 | 6.64E-03 |
| response to extracellular stimulus (GO:0009991)                                      | 593  | 221  | 153.06  | + | 1.44 | 8.29E-04 |
| animal organ development (GO:0048513)                                                | 3159 | 1177 | 815.35  | + | 1.44 | 2.65E-34 |
| cellular response to chemical stimulus (GO:0070887)                                  | 2174 | 810  | 561.12  | + | 1.44 | 1.15E-21 |
| cell cycle (GO:0007049)                                                              | 760  | 283  | 196.16  | + | 1.44 | 1.50E-05 |
| positive regulation of establishment of protein localization (GO:1904951)            | 521  | 194  | 134.47  | + | 1.44 | 5.14E-03 |
| cation transport (GO:0006812)                                                        | 720  | 268  | 185.84  | + | 1.44 | 4.18E-05 |
| inorganic ion transmembrane transport (GO:0098660)                                   | 551  | 205  | 142.22  | + | 1.44 | 2.65E-03 |
| localization of cell (GO:0051674)                                                    | 793  | 295  | 204.68  | + | 1.44 | 7.47E-06 |
| cell motility (GO:0048870)                                                           | 793  | 295  | 204.68  | + | 1.44 | 7.47E-06 |
| response to organic substance (GO:0010033)                                           | 2713 | 1009 | 700.24  | + | 1.44 | 4.46E-28 |
| positive regulation of protein phosphorylation (GO:0001934)                          | 877  | 326  | 226.36  | + | 1.44 | 1.05E-06 |
| positive regulation of multicellular organismal process (GO:0051240)                 | 1543 | 573  | 398.26  | + | 1.44 | 6.78E-14 |
| response to lipid (GO:0033993)                                                       | 1099 | 408  | 283.66  | + | 1.44 | 5.32E-09 |
| cellular ion homeostasis (GO:0006873)                                                | 496  | 184  | 128.02  | + | 1.44 | 1.23E-02 |
| small molecule metabolic process (GO:0044281)                                        | 1428 | 529  | 368.57  | + | 1.44 | 2.16E-12 |
| positive regulation of cellular component movement (GO:0051272)                      | 452  | 167  | 116.66  | + | 1.43 | 4.54E-02 |
| response to wounding (GO:0009611)                                                    | 455  | 168  | 117.44  | + | 1.43 | 4.41E-02 |
| cellular component assembly (GO:0022607)                                             | 1865 | 688  | 481.37  | + | 1.43 | 9.25E-17 |
| embryo development (GO:0009790)                                                      | 1049 | 386  | 270.75  | + | 1.43 | 6.90E-08 |
| cellular response to DNA damage stimulus (GO:0006974)                                | 582  | 214  | 150.22  | + | 1.42 | 3.30E-03 |
| cellular response to organic substance (GO:0071310)                                  | 1771 | 650  | 457.10  | + | 1.42 | 3.73E-15 |
| positive regulation of protein transport (GO:0051222)                                | 485  | 178  | 125.18  | + | 1.42 | 3.32E-02 |
| tissue development (GO:0009888)                                                      | 1608 | 590  | 415.03  | + | 1.42 | 2.10E-13 |
| epithelium development (GO:0060429)                                                  | 1009 | 370  | 260.43  | + | 1.42 | 2.85E-07 |
| cell cycle process (GO:0022402)                                                      | 723  | 265  | 186.61  | + | 1.42 | 1.87E-04 |
| macromolecular complex subunit organization (GO:0043933)                             | 1743 | 638  | 449.88  | + | 1.42 | 1.45E-14 |
| chromatin organization (GO:0006325)                                                  | 564  | 206  | 145.57  | + | 1.42 | 8.30E-03 |
| cellular macromolecule metabolic process (GO:0044260)                                | 5345 | 1950 | 1379.57 | + | 1.41 | 3.64E-59 |



|                                                                             |      |      |         |   |      |          |
|-----------------------------------------------------------------------------|------|------|---------|---|------|----------|
| cellular metabolic process (GO:0044237)                                     | 7028 | 2558 | 1813.96 | + | 1.41 | 1.14E-86 |
| RNA metabolic process (GO:0016070)                                          | 2014 | 733  | 519.82  | + | 1.41 | 1.01E-16 |
| sensory organ development (GO:0007423)                                      | 589  | 214  | 152.02  | + | 1.41 | 7.33E-03 |
| transmembrane transport (GO:0055085)                                        | 1042 | 378  | 268.95  | + | 1.41 | 6.17E-07 |
| regulation of macromolecule metabolic process (GO:0060255)                  | 5150 | 1863 | 1329.24 | + | 1.40 | 5.00E-53 |
| regulation of primary metabolic process (GO:0080090)                        | 5149 | 1862 | 1328.98 | + | 1.40 | 6.92E-53 |
| regulation of cellular metabolic process (GO:0031323)                       | 5218 | 1883 | 1346.79 | + | 1.40 | 4.45E-53 |
| regulation of metabolic process (GO:0019222)                                | 5499 | 1982 | 1419.32 | + | 1.40 | 1.34E-56 |
| homeostatic process (GO:0042592)                                            | 1407 | 507  | 363.15  | + | 1.40 | 8.09E-10 |
| nucleobase-containing compound metabolic process (GO:0006139)               | 2943 | 1059 | 759.60  | + | 1.39 | 1.11E-24 |
| cellular aromatic compound metabolic process (GO:0006725)                   | 3120 | 1121 | 805.29  | + | 1.39 | 2.84E-26 |
| cellular component biogenesis (GO:0044085)                                  | 2108 | 756  | 544.09  | + | 1.39 | 7.59E-16 |
| heterocycle metabolic process (GO:0046483)                                  | 3061 | 1097 | 790.06  | + | 1.39 | 3.59E-25 |
| regulation of response to stress (GO:0080134)                               | 1142 | 409  | 294.76  | + | 1.39 | 4.89E-07 |
| organic cyclic compound metabolic process (GO:1901360)                      | 3285 | 1173 | 847.88  | + | 1.38 | 8.53E-27 |
| regulation of nitrogen compound metabolic process (GO:0051171)              | 3740 | 1332 | 965.31  | + | 1.38 | 4.94E-31 |
| macromolecular complex assembly (GO:0065003)                                | 1206 | 429  | 311.27  | + | 1.38 | 3.85E-07 |
| regulation of gene expression (GO:0010468)                                  | 3647 | 1295 | 941.31  | + | 1.38 | 2.23E-29 |
| nucleic acid metabolic process (GO:0090304)                                 | 2470 | 877  | 637.52  | + | 1.38 | 6.69E-18 |
| regulation of macromolecule biosynthetic process (GO:0010556)               | 3463 | 1229 | 893.82  | + | 1.37 | 2.24E-27 |
| organ morphogenesis (GO:0009887)                                            | 933  | 331  | 240.81  | + | 1.37 | 8.73E-05 |
| regulation of cell proliferation (GO:0042127)                               | 1562 | 554  | 403.16  | + | 1.37 | 7.26E-10 |
| regulation of cellular macromolecule biosynthetic process (GO:2000112)      | 3355 | 1189 | 865.94  | + | 1.37 | 5.20E-26 |
| organic substance biosynthetic process (GO:1901576)                         | 3177 | 1125 | 820.00  | + | 1.37 | 4.11E-24 |
| positive regulation of response to stimulus (GO:0048584)                    | 1778 | 629  | 458.91  | + | 1.37 | 1.97E-11 |
| biosynthetic process (GO:0009058)                                           | 3255 | 1151 | 840.13  | + | 1.37 | 1.33E-24 |
| primary metabolic process (GO:0044238)                                      | 7212 | 2547 | 1861.45 | + | 1.37 | 9.43E-73 |
| regulation of biosynthetic process (GO:0009889)                             | 3696 | 1303 | 953.96  | + | 1.37 | 2.65E-28 |
| regulation of nucleic acid-templated transcription (GO:1903506)             | 3003 | 1058 | 775.09  | + | 1.37 | 1.41E-21 |
| regulation of nucleobase-containing compound metabolic process (GO:0019219) | 3481 | 1226 | 898.46  | + | 1.36 | 5.34E-26 |
| regulation of cell adhesion (GO:0030155)                                    | 619  | 218  | 159.77  | + | 1.36 | 4.36E-02 |
| organic substance metabolic process (GO:0071704)                            | 7647 | 2693 | 1973.73 | + | 1.36 | 4.04E-78 |
| regulation of RNA biosynthetic process (GO:2001141)                         | 3010 | 1060 | 776.90  | + | 1.36 | 1.44E-21 |
| regulation of cellular biosynthetic process (GO:0031326)                    | 3632 | 1279 | 937.44  | + | 1.36 | 1.97E-27 |
| regulation of transcription, DNA-templated (GO:0006355)                     | 2977 | 1048 | 768.38  | + | 1.36 | 3.32E-21 |
| regulation of RNA metabolic process (GO:0051252)                            | 3133 | 1102 | 808.64  | + | 1.36 | 1.74E-22 |
| biological adhesion (GO:0022610)                                            | 882  | 310  | 227.65  | + | 1.36 | 5.89E-04 |
| cellular biosynthetic process (GO:0044249)                                  | 3109 | 1092 | 802.45  | + | 1.36 | 5.12E-22 |

|                                                              |       |      |         |   |       |           |
|--------------------------------------------------------------|-------|------|---------|---|-------|-----------|
| protein metabolic process (GO:0019538)                       | 3867  | 1355 | 998.09  | + | 1.36  | 1.24E-28  |
| cell adhesion (GO:0007155)                                   | 871   | 305  | 224.81  | + | 1.36  | 1.03E-03  |
| macromolecule metabolic process (GO:0043170)                 | 6052  | 2112 | 1562.05 | + | 1.35  | 4.03E-51  |
| metabolic process (GO:0008152)                               | 8072  | 2810 | 2083.43 | + | 1.35  | 4.42E-78  |
| organic acid metabolic process (GO:0006082)                  | 771   | 267  | 199.00  | + | 1.34  | 1.42E-02  |
| positive regulation of cell proliferation (GO:0008284)       | 887   | 307  | 228.94  | + | 1.34  | 2.54E-03  |
| nitrogen compound metabolic process (GO:0006807)             | 4129  | 1425 | 1065.72 | + | 1.34  | 1.21E-27  |
| chromosome organization (GO:0051276)                         | 841   | 290  | 217.07  | + | 1.34  | 7.19E-03  |
| response to external stimulus (GO:0009605)                   | 1979  | 679  | 510.79  | + | 1.33  | 4.92E-10  |
| cell surface receptor signaling pathway (GO:0007166)         | 1656  | 568  | 427.42  | + | 1.33  | 7.52E-08  |
| macromolecule biosynthetic process (GO:0009059)              | 2384  | 815  | 615.32  | + | 1.32  | 2.02E-12  |
| cellular macromolecule biosynthetic process (GO:0034645)     | 2357  | 805  | 608.35  | + | 1.32  | 3.96E-12  |
| response to stress (GO:0006950)                              | 2989  | 1016 | 771.48  | + | 1.32  | 7.23E-16  |
| cellular nitrogen compound metabolic process (GO:0034641)    | 3794  | 1283 | 979.25  | + | 1.31  | 9.41E-21  |
| reproductive process (GO:0022414)                            | 1402  | 472  | 361.86  | + | 1.30  | 4.94E-05  |
| reproduction (GO:0000003)                                    | 1405  | 473  | 362.64  | + | 1.30  | 4.77E-05  |
| gene expression (GO:0010467)                                 | 2601  | 869  | 671.33  | + | 1.29  | 3.46E-11  |
| cellular nitrogen compound biosynthetic process (GO:0044271) | 2277  | 759  | 587.71  | + | 1.29  | 4.16E-09  |
| proteolysis (GO:0006508)                                     | 1066  | 353  | 275.14  | + | 1.28  | 1.82E-02  |
| single organism reproductive process (GO:0044702)            | 1261  | 417  | 325.47  | + | 1.28  | 2.49E-03  |
| organonitrogen compound metabolic process (GO:1901564)       | 1778  | 573  | 458.91  | + | 1.25  | 4.03E-04  |
| cellular process (GO:0009987)                                | 14095 | 4461 | 3637.99 | + | 1.23  | 1.02E-102 |
| biological regulation (GO:0065007)                           | 11690 | 3691 | 3017.25 | + | 1.22  | 5.68E-63  |
| single-organism cellular process (GO:0044763)                | 10837 | 3415 | 2797.09 | + | 1.22  | 1.67E-52  |
| single-organism process (GO:0044699)                         | 12411 | 3897 | 3203.34 | + | 1.22  | 1.21E-67  |
| regulation of biological process (GO:0050789)                | 11093 | 3468 | 2863.16 | + | 1.21  | 3.37E-50  |
| regulation of cellular process (GO:0050794)                  | 10637 | 3322 | 2745.47 | + | 1.21  | 1.61E-45  |
| multi-organism process (GO:0051704)                          | 1944  | 602  | 501.76  | + | 1.20  | 2.49E-02  |
| biological_process (GO:0008150)                              | 17404 | 5331 | 4492.06 | + | 1.19  | 4.92E-145 |
| multicellular organismal process (GO:0032501)                | 7149  | 2160 | 1845.19 | + | 1.17  | 2.66E-14  |
| response to stimulus (GO:0050896)                            | 8233  | 2402 | 2124.98 | + | 1.13  | 8.03E-10  |
| cellular response to stimulus (GO:0051716)                   | 6618  | 1879 | 1708.14 | + | 1.10  | 6.26E-03  |
| system process (GO:0003008)                                  | 2700  | 486  | 696.88  | - | .70   | 2.51E-15  |
| neurological system process (GO:0050877)                     | 2229  | 326  | 575.32  | - | .57   | 2.29E-28  |
| Unclassified (UNCLASSIFIED)                                  | 6377  | 807  | 1645.94 | - | .49   | 0.00E00   |
| G-protein coupled receptor signaling pathway (GO:0007186)    | 2278  | 234  | 587.96  | - | .40   | 4.43E-63  |
| sensory perception (GO:0007600)                              | 1865  | 150  | 481.37  | - | .31   | 3.12E-70  |
| detection of stimulus (GO:0051606)                           | 1605  | 75   | 414.26  | - | < 0.2 | 5.06E-94  |

|                                                                                     |      |    |        |   |       |           |
|-------------------------------------------------------------------------------------|------|----|--------|---|-------|-----------|
| detection of stimulus involved in sensory perception (GO:0050906)                   | 1509 | 50 | 389.48 | - | < 0.2 | 3.91E-105 |
| sensory perception of chemical stimulus (GO:0007606)                                | 1510 | 44 | 389.74 | - | < 0.2 | 6.97E-111 |
| detection of chemical stimulus (GO:0009593)                                         | 1477 | 39 | 381.22 | - | < 0.2 | 2.63E-112 |
| sensory perception of smell (GO:0007608)                                            | 1427 | 36 | 368.32 | - | < 0.2 | 5.41E-110 |
| detection of chemical stimulus involved in sensory perception (GO:0050907)          | 1445 | 27 | 372.96 | - | < 0.2 | 8.84E-122 |
| detection of chemical stimulus involved in sensory perception of smell (GO:0050911) | 1389 | 25 | 358.51 | - | < 0.2 | 6.55E-118 |
