# Supplementary material for: The RNA-Binding Protein hnRNP K Mediates the Effect of BDNF on Dendritic mRNA Metabolism and Regulates Synaptic NMDA Receptors in Hippocampal Neurons
Source: PubMed Central journal article supplement (PMC5732018; doi:10.1523/eneuro.0268-17.2017), 2017-12-12
Supplement: sup_enu-eN-NWR-0268-17-s10.pdf [file sup_enu-eN-NWR-0268-17-s10.pdf]

**Table 1-7 - Cellular components associated with mRNAs co-immunoprecipitated with hnRNP K and regulated by BDNF as assessed by Gene Ontology**

| GO Cellular component                                | Rattus norvegicus<br>(reference list) | uploaded<br>list | (expected) | (over/under) | (fold enrichment) | (P-value) |
|------------------------------------------------------|---------------------------------------|------------------|------------|--------------|-------------------|-----------|
| clathrin-coated pit (GO:0005905)                     | 54                                    | 35               | 13.94      | +            | 2.51              | 1.84E-03  |
| exocytic vesicle membrane (GO:0099501)               | 62                                    | 40               | 16.00      | +            | 2.50              | 3.89E-04  |
| synaptic vesicle membrane (GO:0030672)               | 62                                    | 40               | 16.00      | +            | 2.50              | 3.89E-04  |
| dendritic shaft (GO:0043198)                         | 58                                    | 37               | 14.97      | +            | 2.47              | 1.36E-03  |
| T-tubule (GO:0030315)                                | 60                                    | 38               | 15.49      | +            | 2.45              | 1.16E-03  |
| neuron projection membrane (GO:0032589)              | 49                                    | 31               | 12.65      | +            | 2.45              | 1.12E-02  |
| SNARE complex (GO:0031201)                           | 51                                    | 32               | 13.16      | +            | 2.43              | 9.55E-03  |
| spindle microtubule (GO:0005876)                     | 53                                    | 33               | 13.68      | +            | 2.41              | 8.12E-03  |
| neurotransmitter receptor complex (GO:0098878)       | 50                                    | 31               | 12.91      | +            | 2.40              | 1.64E-02  |
| ionotropic glutamate receptor complex (GO:0008328)   | 50                                    | 31               | 12.91      | +            | 2.40              | 1.64E-02  |
| terminal bouton (GO:0043195)                         | 111                                   | 67               | 28.65      | +            | 2.34              | 7.92E-07  |
| late endosome membrane (GO:0031902)                  | 63                                    | 37               | 16.26      | +            | 2.28              | 8.45E-03  |
| postsynaptic density (GO:0014069)                    | 235                                   | 138              | 60.65      | +            | 2.28              | 9.55E-15  |
| postsynaptic specialization (GO:0099572)             | 235                                   | 138              | 60.65      | +            | 2.28              | 9.55E-15  |
| cytoplasmic microtubule (GO:0005881)                 | 55                                    | 32               | 14.20      | +            | 2.25              | 4.02E-02  |
| main axon (GO:0044304)                               | 74                                    | 43               | 19.10      | +            | 2.25              | 2.11E-03  |
| Golgi-associated vesicle (GO:0005798)                | 69                                    | 40               | 17.81      | +            | 2.25              | 4.99E-03  |
| excitatory synapse (GO:0060076)                      | 255                                   | 146              | 65.82      | +            | 2.22              | 8.76E-15  |
| transport vesicle membrane (GO:0030658)              | 117                                   | 66               | 30.20      | +            | 2.19              | 1.36E-05  |
| presynapse (GO:0098793)                              | 330                                   | 185              | 85.17      | +            | 2.17              | 3.16E-18  |
| axon part (GO:0033267)                               | 307                                   | 171              | 79.24      | +            | 2.16              | 1.86E-16  |
| presynaptic membrane (GO:0042734)                    | 74                                    | 41               | 19.10      | +            | 2.15              | 1.09E-02  |
| voltage-gated potassium channel complex (GO:0008076) | 76                                    | 42               | 19.62      | +            | 2.14              | 9.06E-03  |
| dendrite (GO:0030425)                                | 581                                   | 320              | 149.96     | +            | 2.13              | 1.47E-31  |
| neuron projection terminus (GO:0044306)              | 198                                   | 109              | 51.10      | +            | 2.13              | 1.29E-09  |
| filopodium (GO:0030175)                              | 91                                    | 50               | 23.49      | +            | 2.13              | 1.55E-03  |
| neuron spine (GO:0044309)                            | 155                                   | 85               | 40.01      | +            | 2.12              | 4.43E-07  |
| axon terminus (GO:0043679)                           | 185                                   | 101              | 47.75      | +            | 2.12              | 1.34E-08  |
| autophagosome (GO:0005776)                           | 70                                    | 38               | 18.07      | +            | 2.10              | 3.46E-02  |

|                                                      |      |     |        |   |      |          |
|------------------------------------------------------|------|-----|--------|---|------|----------|
| dendritic spine (GO:0043197)                         | 153  | 83  | 39.49  | + | 2.10 | 1.15E-06 |
| endosome membrane (GO:0010008)                       | 240  | 130 | 61.95  | + | 2.10 | 2.83E-11 |
| Golgi membrane (GO:0000139)                          | 390  | 211 | 100.66 | + | 2.10 | 2.95E-19 |
| potassium channel complex (GO:0034705)               | 78   | 42  | 20.13  | + | 2.09 | 1.65E-02 |
| trans-Golgi network (GO:0005802)                     | 158  | 85  | 40.78  | + | 2.08 | 1.06E-06 |
| synapse (GO:0045202)                                 | 842  | 449 | 217.32 | + | 2.07 | 6.01E-42 |
| postsynaptic membrane (GO:0045211)                   | 197  | 105 | 50.85  | + | 2.07 | 2.04E-08 |
| axon (GO:0030424)                                    | 550  | 293 | 141.96 | + | 2.06 | 2.00E-26 |
| synaptic vesicle (GO:0008021)                        | 154  | 82  | 39.75  | + | 2.06 | 3.26E-06 |
| synaptic membrane (GO:0097060)                       | 267  | 142 | 68.91  | + | 2.06 | 7.33E-12 |
| synapse part (GO:0044456)                            | 677  | 360 | 174.74 | + | 2.06 | 7.74E-33 |
| postsynapse (GO:0098794)                             | 428  | 227 | 110.47 | + | 2.05 | 8.26E-20 |
| neuron projection (GO:0043005)                       | 1165 | 610 | 300.69 | + | 2.03 | 8.07E-56 |
| somatodendritic compartment (GO:0036477)             | 865  | 452 | 223.26 | + | 2.02 | 3.95E-40 |
| mitochondrial outer membrane (GO:0005741)            | 138  | 72  | 35.62  | + | 2.02 | 6.26E-05 |
| sarcolemma (GO:0042383)                              | 150  | 78  | 38.72  | + | 2.01 | 2.06E-05 |
| Golgi apparatus part (GO:0044431)                    | 577  | 300 | 148.93 | + | 2.01 | 1.92E-25 |
| endosomal part (GO:0044440)                          | 258  | 134 | 66.59  | + | 2.01 | 2.19E-10 |
| serine/threonine protein kinase complex (GO:1902554) | 81   | 42  | 20.91  | + | 2.01 | 3.83E-02 |
| exocytic vesicle (GO:0070382)                        | 170  | 88  | 43.88  | + | 2.01 | 3.22E-06 |
| transport vesicle (GO:0030133)                       | 292  | 151 | 75.37  | + | 2.00 | 9.32E-12 |
| clathrin-coated vesicle (GO:0030136)                 | 97   | 50  | 25.04  | + | 2.00 | 8.51E-03 |
| coated vesicle (GO:0030135)                          | 152  | 78  | 39.23  | + | 1.99 | 3.51E-05 |
| cytoplasmic vesicle part (GO:0044433)                | 305  | 156 | 78.72  | + | 1.98 | 8.08E-12 |
| leading edge membrane (GO:0031256)                   | 133  | 68  | 34.33  | + | 1.98 | 2.93E-04 |
| cytoplasmic vesicle membrane (GO:0030659)            | 283  | 144 | 73.04  | + | 1.97 | 1.27E-10 |
| growth cone (GO:0030426)                             | 171  | 87  | 44.14  | + | 1.97 | 8.53E-06 |
| vacuolar membrane (GO:0005774)                       | 421  | 214 | 108.66 | + | 1.97 | 1.55E-16 |
| organelle outer membrane (GO:0031968)                | 158  | 80  | 40.78  | + | 1.96 | 4.06E-05 |
| site of polarized growth (GO:0030427)                | 176  | 89  | 45.43  | + | 1.96 | 7.60E-06 |
| outer membrane (GO:0019867)                          | 163  | 82  | 42.07  | + | 1.95 | 3.61E-05 |
| neuronal cell body (GO:0043025)                      | 623  | 313 | 160.80 | + | 1.95 | 2.95E-24 |
| Golgi subcompartment (GO:0098791)                    | 245  | 123 | 63.24  | + | 1.95 | 1.75E-08 |

|                                                        |      |     |        |   |      |          |
|--------------------------------------------------------|------|-----|--------|---|------|----------|
| organelle subcompartment (GO:0031984)                  | 258  | 129 | 66.59  | + | 1.94 | 7.34E-09 |
| vacuolar part (GO:0044437)                             | 441  | 220 | 113.82 | + | 1.93 | 3.77E-16 |
| neuron part (GO:0097458)                               | 1518 | 753 | 391.80 | + | 1.92 | 5.71E-61 |
| cell body (GO:0044297)                                 | 700  | 346 | 180.67 | + | 1.92 | 7.99E-26 |
| ribonucleoprotein granule (GO:0035770)                 | 146  | 72  | 37.68  | + | 1.91 | 4.91E-04 |
| whole membrane (GO:0098805)                            | 1122 | 553 | 289.59 | + | 1.91 | 1.16E-42 |
| cytoplasmic ribonucleoprotein granule (GO:0036464)     | 138  | 68  | 35.62  | + | 1.91 | 1.04E-03 |
| recycling endosome (GO:0055037)                        | 122  | 60  | 31.49  | + | 1.91 | 4.64E-03 |
| cation channel complex (GO:0034703)                    | 155  | 76  | 40.01  | + | 1.90 | 2.96E-04 |
| cell leading edge (GO:0031252)                         | 349  | 171 | 90.08  | + | 1.90 | 1.59E-11 |
| bounding membrane of organelle (GO:0098588)            | 1191 | 583 | 307.40 | + | 1.90 | 2.51E-44 |
| vesicle membrane (GO:0012506)                          | 311  | 151 | 80.27  | + | 1.88 | 1.06E-09 |
| microbody (GO:0042579)                                 | 136  | 66  | 35.10  | + | 1.88 | 2.43E-03 |
| peroxisome (GO:0005777)                                | 136  | 66  | 35.10  | + | 1.88 | 2.43E-03 |
| membrane region (GO:0098589)                           | 396  | 192 | 102.21 | + | 1.88 | 1.02E-12 |
| focal adhesion (GO:0005925)                            | 390  | 189 | 100.66 | + | 1.88 | 1.79E-12 |
| perinuclear region of cytoplasm (GO:0048471)           | 637  | 308 | 164.41 | + | 1.87 | 2.60E-21 |
| ruffle (GO:0001726)                                    | 145  | 70  | 37.43  | + | 1.87 | 1.46E-03 |
| lamellipodium (GO:0030027)                             | 162  | 78  | 41.81  | + | 1.87 | 4.14E-04 |
| cell-substrate adherens junction (GO:0005924)          | 395  | 190 | 101.95 | + | 1.86 | 2.97E-12 |
| Golgi apparatus (GO:0005794)                           | 1165 | 558 | 300.69 | + | 1.86 | 1.18E-39 |
| cell-substrate junction (GO:0030055)                   | 400  | 191 | 103.24 | + | 1.85 | 4.89E-12 |
| endocytic vesicle (GO:0030139)                         | 128  | 61  | 33.04  | + | 1.85 | 9.86E-03 |
| intrinsic component of organelle membrane (GO:0031300) | 143  | 68  | 36.91  | + | 1.84 | 3.35E-03 |
| adherens junction (GO:0005912)                         | 470  | 219 | 121.31 | + | 1.81 | 5.81E-13 |
| endosome (GO:0005768)                                  | 642  | 299 | 165.70 | + | 1.80 | 2.49E-18 |
| ion channel complex (GO:0034702)                       | 262  | 122 | 67.62  | + | 1.80 | 1.73E-06 |
| integral component of organelle membrane (GO:0031301)  | 140  | 65  | 36.13  | + | 1.80 | 1.14E-02 |
| early endosome (GO:0005769)                            | 246  | 114 | 63.49  | + | 1.80 | 7.52E-06 |
| myelin sheath (GO:0043209)                             | 208  | 96  | 53.69  | + | 1.79 | 1.34E-04 |
| anchoring junction (GO:0070161)                        | 485  | 222 | 125.18 | + | 1.77 | 2.22E-12 |
| membrane microdomain (GO:0098857)                      | 337  | 154 | 86.98  | + | 1.77 | 4.91E-08 |
| membrane raft (GO:0045121)                             | 337  | 154 | 86.98  | + | 1.77 | 4.91E-08 |

|                                                                             |      |      |        |   |      |          |
|-----------------------------------------------------------------------------|------|------|--------|---|------|----------|
| microtubule (GO:0005874)                                                    | 322  | 147  | 83.11  | + | 1.77 | 1.44E-07 |
| lytic vacuole membrane (GO:0098852)                                         | 213  | 97   | 54.98  | + | 1.76 | 2.08E-04 |
| lysosomal membrane (GO:0005765)                                             | 213  | 97   | 54.98  | + | 1.76 | 2.08E-04 |
| perikaryon (GO:0043204)                                                     | 141  | 64   | 36.39  | + | 1.76 | 2.57E-02 |
| vacuole (GO:0005773)                                                        | 979  | 444  | 252.69 | + | 1.76 | 5.76E-26 |
| cell projection membrane (GO:0031253)                                       | 263  | 119  | 67.88  | + | 1.75 | 1.28E-05 |
| cell projection part (GO:0044463)                                           | 1015 | 455  | 261.98 | + | 1.74 | 1.21E-25 |
| transporter complex (GO:1990351)                                            | 293  | 131  | 75.62  | + | 1.73 | 4.79E-06 |
| ubiquitin ligase complex (GO:0000151)                                       | 273  | 122  | 70.46  | + | 1.73 | 1.64E-05 |
| transmembrane transporter complex (GO:1902495)                              | 289  | 129  | 74.59  | + | 1.73 | 6.87E-06 |
| late endosome (GO:0005770)                                                  | 177  | 79   | 45.68  | + | 1.73 | 5.52E-03 |
| cell projection (GO:0042995)                                                | 1921 | 856  | 495.82 | + | 1.73 | 8.32E-51 |
| cell junction (GO:0030054)                                                  | 1122 | 495  | 289.59 | + | 1.71 | 1.26E-26 |
| organelle membrane (GO:0031090)                                             | 1949 | 857  | 503.05 | + | 1.70 | 1.28E-48 |
| cullin-RING ubiquitin ligase complex (GO:0031461)                           | 153  | 67   | 39.49  | + | 1.70 | 4.85E-02 |
| cytoplasmic, membrane-bounded vesicle (GO:0016023)                          | 925  | 404  | 238.75 | + | 1.69 | 1.72E-20 |
| cytoplasmic region (GO:0099568)                                             | 298  | 130  | 76.92  | + | 1.69 | 2.17E-05 |
| nuclear outer membrane-endoplasmic reticulum membrane network (GO:0042175)  | 703  | 306  | 181.45 | + | 1.69 | 8.04E-15 |
| endoplasmic reticulum part (GO:0044432)                                     | 772  | 335  | 199.26 | + | 1.68 | 3.20E-16 |
| endomembrane system (GO:0012505)                                            | 3241 | 1404 | 836.52 | + | 1.68 | 3.34E-82 |
| endoplasmic reticulum membrane (GO:0005789)                                 | 686  | 297  | 177.06 | + | 1.68 | 4.89E-14 |
| cytoplasmic vesicle (GO:0031410)                                            | 1035 | 448  | 267.14 | + | 1.68 | 3.07E-22 |
| intracellular vesicle (GO:0097708)                                          | 1037 | 448  | 267.66 | + | 1.67 | 4.43E-22 |
| endoplasmic reticulum (GO:0005783)                                          | 1355 | 584  | 349.73 | + | 1.67 | 2.05E-29 |
| transferase complex (GO:1990234)                                            | 701  | 297  | 180.93 | + | 1.64 | 7.00E-13 |
| plasma membrane region (GO:0098590)                                         | 920  | 389  | 237.46 | + | 1.64 | 2.37E-17 |
| nuclear envelope (GO:0005635)                                               | 384  | 162  | 99.11  | + | 1.63 | 3.89E-06 |
| nuclear membrane (GO:0031965)                                               | 243  | 102  | 62.72  | + | 1.63 | 3.54E-03 |
| transferase complex, transferring phosphorus-containing groups (GO:0061695) | 239  | 100  | 61.69  | + | 1.62 | 5.01E-03 |
| nucleoplasm (GO:0005654)                                                    | 2113 | 882  | 545.38 | + | 1.62 | 1.57E-41 |
| plasma membrane protein complex (GO:0098797)                                | 476  | 195  | 122.86 | + | 1.59 | 9.75E-07 |
| spindle (GO:0005819)                                                        | 259  | 106  | 66.85  | + | 1.59 | 6.64E-03 |
| cell cortex (GO:0005938)                                                    | 239  | 97   | 61.69  | + | 1.57 | 2.21E-02 |

|                                                       |       |      |         |   |      |           |
|-------------------------------------------------------|-------|------|---------|---|------|-----------|
| actin cytoskeleton (GO:0015629)                       | 430   | 174  | 110.99  | + | 1.57 | 1.76E-05  |
| nuclear body (GO:0016604)                             | 287   | 116  | 74.08   | + | 1.57 | 4.33E-03  |
| envelope (GO:0031975)                                 | 981   | 396  | 253.20  | + | 1.56 | 1.49E-14  |
| organelle envelope (GO:0031967)                       | 974   | 393  | 251.39  | + | 1.56 | 2.13E-14  |
| catalytic complex (GO:1902494)                        | 1058  | 426  | 273.08  | + | 1.56 | 1.21E-15  |
| receptor complex (GO:0043235)                         | 320   | 127  | 82.59   | + | 1.54 | 3.67E-03  |
| lytic vacuole (GO:0000323)                            | 429   | 170  | 110.73  | + | 1.54 | 9.64E-05  |
| lysosome (GO:0005764)                                 | 429   | 170  | 110.73  | + | 1.54 | 9.64E-05  |
| transcription factor complex (GO:0005667)             | 313   | 123  | 80.79   | + | 1.52 | 8.10E-03  |
| cytoplasmic part (GO:0044444)                         | 6819  | 2675 | 1760.02 | + | 1.52 | 5.00E-133 |
| intracellular organelle lumen (GO:0070013)            | 3296  | 1291 | 850.71  | + | 1.52 | 5.72E-50  |
| organelle lumen (GO:0043233)                          | 3301  | 1292 | 852.01  | + | 1.52 | 7.51E-50  |
| membrane-enclosed lumen (GO:0031974)                  | 3301  | 1292 | 852.01  | + | 1.52 | 7.51E-50  |
| membrane protein complex (GO:0098796)                 | 1031  | 403  | 266.11  | + | 1.51 | 9.19E-13  |
| nuclear part (GO:0044428)                             | 3385  | 1319 | 873.69  | + | 1.51 | 4.09E-50  |
| nuclear lumen (GO:0031981)                            | 2921  | 1138 | 753.93  | + | 1.51 | 6.90E-42  |
| nucleoplasm part (GO:0044451)                         | 668   | 260  | 172.41  | + | 1.51 | 2.09E-07  |
| mitochondrial membrane (GO:0031966)                   | 558   | 217  | 144.02  | + | 1.51 | 7.14E-06  |
| cytosol (GO:0005829)                                  | 1984  | 770  | 512.08  | + | 1.50 | 5.16E-26  |
| mitochondrial envelope (GO:0005740)                   | 603   | 234  | 155.64  | + | 1.50 | 2.18E-06  |
| mitochondrion (GO:0005739)                            | 1740  | 671  | 449.10  | + | 1.49 | 1.61E-21  |
| secretory vesicle (GO:0099503)                        | 449   | 173  | 115.89  | + | 1.49 | 4.20E-04  |
| cytoplasm (GO:0005737)                                | 9562  | 3678 | 2468.00 | + | 1.49 | 2.98E-209 |
| mitochondrial part (GO:0044429)                       | 786   | 302  | 202.87  | + | 1.49 | 2.72E-08  |
| intracellular organelle part (GO:0044446)             | 6833  | 2619 | 1763.63 | + | 1.49 | 1.67E-116 |
| intracellular membrane-bounded organelle (GO:0043231) | 9568  | 3664 | 2469.55 | + | 1.48 | 7.09E-204 |
| nucleolus (GO:0005730)                                | 815   | 312  | 210.36  | + | 1.48 | 1.87E-08  |
| vesicle (GO:0031982)                                  | 3401  | 1299 | 877.82  | + | 1.48 | 8.01E-45  |
| membrane-bounded vesicle (GO:0031988)                 | 3254  | 1241 | 839.87  | + | 1.48 | 4.36E-42  |
| organelle part (GO:0044422)                           | 7014  | 2668 | 1810.35 | + | 1.47 | 8.79E-116 |
| membrane-bounded organelle (GO:0043227)               | 10720 | 4035 | 2766.89 | + | 1.46 | 1.58E-229 |
| protein complex (GO:0043234)                          | 4040  | 1520 | 1042.75 | + | 1.46 | 1.14E-50  |
| microtubule cytoskeleton (GO:0015630)                 | 1010  | 379  | 260.69  | + | 1.45 | 1.46E-09  |

|                                                           |       |      |         |   |      |           |
|-----------------------------------------------------------|-------|------|---------|---|------|-----------|
| cytoskeleton (GO:0005856)                                 | 1760  | 657  | 454.27  | + | 1.45 | 8.96E-18  |
| extracellular vesicle (GO:1903561)                        | 2610  | 973  | 673.65  | + | 1.44 | 5.11E-28  |
| extracellular organelle (GO:0043230)                      | 2617  | 975  | 675.46  | + | 1.44 | 5.39E-28  |
| extracellular exosome (GO:0070062)                        | 2596  | 966  | 670.04  | + | 1.44 | 1.65E-27  |
| nucleus (GO:0005634)                                      | 6007  | 2215 | 1550.44 | + | 1.43 | 9.76E-76  |
| intracellular organelle (GO:0043229)                      | 10800 | 3980 | 2787.54 | + | 1.43 | 1.31E-202 |
| intracellular part (GO:0044424)                           | 12356 | 4505 | 3189.15 | + | 1.41 | 4.65E-256 |
| organelle (GO:0043226)                                    | 11850 | 4307 | 3058.55 | + | 1.41 | 3.26E-226 |
| polymeric cytoskeletal fiber (GO:0099513)                 | 560   | 203  | 144.54  | + | 1.40 | 2.41E-03  |
| supramolecular fiber (GO:0099512)                         | 560   | 203  | 144.54  | + | 1.40 | 2.41E-03  |
| intracellular (GO:0005622)                                | 12864 | 4637 | 3320.27 | + | 1.40 | 1.84E-261 |
| microtubule organizing center (GO:0005815)                | 592   | 213  | 152.80  | + | 1.39 | 2.21E-03  |
| plasma membrane part (GO:0044459)                         | 2252  | 802  | 581.25  | + | 1.38 | 3.96E-17  |
| intracellular non-membrane-bounded organelle (GO:0043232) | 3946  | 1403 | 1018.48 | + | 1.38 | 1.13E-33  |
| non-membrane-bounded organelle (GO:0043228)               | 3946  | 1403 | 1018.48 | + | 1.38 | 1.13E-33  |
| macromolecular complex (GO:0032991)                       | 5064  | 1798 | 1307.04 | + | 1.38 | 3.77E-46  |
| nuclear chromosome part (GO:0044454)                      | 488   | 173  | 125.96  | + | 1.37 | 4.20E-02  |
| cytoskeletal part (GO:0044430)                            | 1358  | 481  | 350.51  | + | 1.37 | 6.61E-09  |
| chromosome (GO:0005694)                                   | 862   | 304  | 222.49  | + | 1.37 | 8.90E-05  |
| chromosomal part (GO:0044427)                             | 790   | 278  | 203.90  | + | 1.36 | 3.81E-04  |
| integral component of plasma membrane (GO:0005887)        | 1094  | 383  | 282.37  | + | 1.36 | 3.88E-06  |
| intrinsic component of plasma membrane (GO:0031226)       | 1162  | 406  | 299.92  | + | 1.35 | 1.61E-06  |
| extracellular region part (GO:0044421)                    | 3745  | 1230 | 966.60  | + | 1.27 | 3.08E-16  |
| cell part (GO:0044464)                                    | 15800 | 5096 | 4078.06 | + | 1.25 | 5.02E-184 |
| cell (GO:0005623)                                         | 15869 | 5105 | 4095.87 | + | 1.25 | 8.18E-182 |
| extracellular region (GO:0005576)                         | 4135  | 1312 | 1067.27 | + | 1.23 | 7.44E-13  |
| membrane (GO:0016020)                                     | 9765  | 2987 | 2520.40 | + | 1.19 | 2.04E-30  |
| cellular_component (GO:0005575)                           | 18430 | 5595 | 4756.88 | + | 1.18 | 2.23E-173 |
| cell periphery (GO:0071944)                               | 5396  | 1539 | 1392.74 | + | 1.11 | 6.94E-03  |
| plasma membrane (GO:0005886)                              | 5275  | 1497 | 1361.50 | + | 1.10 | 2.52E-02  |
| membrane part (GO:0044425)                                | 7677  | 2135 | 1981.47 | + | 1.08 | 2.04E-02  |
| Unclassified (UNCLASSIFIED)                               | 5351  | 543  | 1381.12 | - | .39  | 0.00E00   |
