# Supplementary material for: The RNA-Binding Protein hnRNP K Mediates the Effect of BDNF on Dendritic mRNA Metabolism and Regulates Synaptic NMDA Receptors in Hippocampal Neurons
Source: PubMed Central journal article supplement (PMC5732018; doi:10.1523/eneuro.0268-17.2017), 2017-12-12
Supplement: sup_enu-eN-NWR-0268-17-s11.pdf [file sup_enu-eN-NWR-0268-17-s11.pdf]

**Table 1-8 - Molecular functions associated with mRNAs co-immunoprecipitated with hnRNP K and regulated by BDNF as assessed by Gene Ontology**

| GO Molecular function                                               | Rattus norvegicus<br>(reference list) | uploaded<br>list | (expected) | (over/under) | (fold enrichment) | (P-value) |
|---------------------------------------------------------------------|---------------------------------------|------------------|------------|--------------|-------------------|-----------|
| protein serine/threonine phosphatase activity (GO:0004722)          | 49                                    | 33               | 12.65      | +            | 2.61              | 3.27E-03  |
| ubiquitin binding (GO:0043130)                                      | 105                                   | 58               | 27.10      | +            | 2.14              | 3.95E-04  |
| phosphoprotein phosphatase activity (GO:0004721)                    | 163                                   | 86               | 42.07      | +            | 2.04              | 4.15E-06  |
| ubiquitin-like protein binding (GO:0032182)                         | 127                                   | 66               | 32.78      | +            | 2.01              | 5.03E-04  |
| ubiquitin protein ligase activity (GO:0061630)                      | 197                                   | 101              | 50.85      | +            | 1.99              | 7.55E-07  |
| ubiquitin-like protein ligase activity (GO:0061659)                 | 201                                   | 103              | 51.88      | +            | 1.99              | 5.21E-07  |
| SH3 domain binding (GO:0017124)                                     | 94                                    | 48               | 24.26      | +            | 1.98              | 3.25E-02  |
| protein C-terminus binding (GO:0008022)                             | 210                                   | 107              | 54.20      | +            | 1.97              | 3.21E-07  |
| ion channel binding (GO:0044325)                                    | 124                                   | 63               | 32.01      | +            | 1.97              | 1.95E-03  |
| calmodulin binding (GO:0005516)                                     | 152                                   | 77               | 39.23      | +            | 1.96              | 1.43E-04  |
| syntaxin binding (GO:0019905)                                       | 95                                    | 48               | 24.52      | +            | 1.96              | 4.21E-02  |
| protein tyrosine phosphatase activity (GO:0004725)                  | 100                                   | 50               | 25.81      | +            | 1.94              | 3.73E-02  |
| magnesium ion binding (GO:0000287)                                  | 204                                   | 102              | 52.65      | +            | 1.94              | 2.25E-06  |
| phosphatase activity (GO:0016791)                                   | 261                                   | 130              | 67.37      | +            | 1.93              | 1.57E-08  |
| protein phosphatase binding (GO:0019903)                            | 139                                   | 69               | 35.88      | +            | 1.92              | 1.35E-03  |
| protein tyrosine kinase activity (GO:0004713)                       | 128                                   | 63               | 33.04      | +            | 1.91              | 5.31E-03  |
| ubiquitin-like protein ligase binding (GO:0044389)                  | 279                                   | 137              | 72.01      | +            | 1.90              | 1.12E-08  |
| ubiquitin protein ligase binding (GO:0031625)                       | 275                                   | 135              | 70.98      | +            | 1.90              | 1.63E-08  |
| small GTPase binding (GO:0031267)                                   | 276                                   | 135              | 71.24      | +            | 1.90              | 2.07E-08  |
| SNARE binding (GO:0000149)                                          | 129                                   | 63               | 33.30      | +            | 1.89              | 6.76E-03  |
| Ras GTPase binding (GO:0017016)                                     | 261                                   | 126              | 67.37      | +            | 1.87              | 2.23E-07  |
| GTPase binding (GO:0051020)                                         | 305                                   | 147              | 78.72      | +            | 1.87              | 7.16E-09  |
| isomerase activity (GO:0016853)                                     | 157                                   | 75               | 40.52      | +            | 1.85              | 1.83E-03  |
| kinase binding (GO:0019900)                                         | 661                                   | 310              | 170.61     | +            | 1.82              | 3.28E-19  |
| protein kinase binding (GO:0019901)                                 | 594                                   | 276              | 153.31     | +            | 1.80              | 2.43E-16  |
| phosphoric ester hydrolase activity (GO:0042578)                    | 347                                   | 161              | 89.56      | +            | 1.80              | 1.18E-08  |
| nucleoside-triphosphatase regulator activity (GO:0060589)           | 247                                   | 114              | 63.75      | +            | 1.79              | 1.87E-05  |
| phosphatase binding (GO:0019902)                                    | 185                                   | 85               | 47.75      | +            | 1.78              | 1.65E-03  |
| protein domain specific binding (GO:0019904)                        | 690                                   | 316              | 178.09     | +            | 1.77              | 3.98E-18  |
| potassium ion transmembrane transporter activity (GO:0015079)       | 142                                   | 65               | 36.65      | +            | 1.77              | 3.49E-02  |
| GTPase activity (GO:0003924)                                        | 182                                   | 83               | 46.98      | +            | 1.77              | 2.92E-03  |
| protein serine/threonine kinase activity (GO:0004674)               | 426                                   | 194              | 109.95     | +            | 1.76              | 4.13E-10  |
| protein kinase activity (GO:0004672)                                | 604                                   | 272              | 155.90     | +            | 1.74              | 2.10E-14  |
| kinase activity (GO:0016301)                                        | 806                                   | 362              | 208.03     | +            | 1.74              | 9.69E-20  |
| phosphotransferase activity, alcohol group as acceptor (GO:0016773) | 707                                   | 316              | 182.48     | +            | 1.73              | 1.23E-16  |
| ubiquitin-like protein transferase activity (GO:0019787)            | 412                                   | 183              | 106.34     | +            | 1.72              | 1.49E-08  |
| enzyme activator activity (GO:0008047)                              | 378                                   | 167              | 97.56      | +            | 1.71              | 1.81E-07  |

|                                                                              |      |      |         |   |      |           |
|------------------------------------------------------------------------------|------|------|---------|---|------|-----------|
| enzyme binding (GO:0019899)                                                  | 1866 | 823  | 481.62  | + | 1.71 | 1.26E-46  |
| ubiquitin-protein transferase activity (GO:0004842)                          | 397  | 175  | 102.47  | + | 1.71 | 7.60E-08  |
| GTPase activator activity (GO:0005096)                                       | 205  | 90   | 52.91   | + | 1.70 | 4.84E-03  |
| transferase activity, transferring phosphorus-containing groups (GO:0016772) | 952  | 416  | 245.72  | + | 1.69 | 6.63E-21  |
| GTPase regulator activity (GO:0030695)                                       | 225  | 98   | 58.07   | + | 1.69 | 2.45E-03  |
| voltage-gated channel activity (GO:0022832)                                  | 182  | 79   | 46.98   | + | 1.68 | 2.88E-02  |
| voltage-gated ion channel activity (GO:0005244)                              | 182  | 79   | 46.98   | + | 1.68 | 2.88E-02  |
| microtubule binding (GO:0008017)                                             | 203  | 86   | 52.40   | + | 1.64 | 2.92E-02  |
| ligase activity (GO:0016874)                                                 | 271  | 114  | 69.95   | + | 1.63 | 1.76E-03  |
| guanyl ribonucleotide binding (GO:0032561)                                   | 397  | 167  | 102.47  | + | 1.63 | 5.47E-06  |
| GTP binding (GO:0005525)                                                     | 376  | 158  | 97.05   | + | 1.63 | 1.56E-05  |
| guanyl nucleotide binding (GO:0019001)                                       | 398  | 167  | 102.73  | + | 1.63 | 6.47E-06  |
| identical protein binding (GO:0042802)                                       | 1285 | 538  | 331.67  | + | 1.62 | 1.04E-23  |
| protein heterodimerization activity (GO:0046982)                             | 541  | 225  | 139.63  | + | 1.61 | 2.65E-08  |
| metal ion transmembrane transporter activity (GO:0046873)                    | 397  | 165  | 102.47  | + | 1.61 | 1.50E-05  |
| protein homodimerization activity (GO:0042803)                               | 779  | 321  | 201.06  | + | 1.60 | 3.19E-12  |
| cytoskeletal protein binding (GO:0008092)                                    | 822  | 338  | 212.16  | + | 1.59 | 7.24E-13  |
| transcription factor binding (GO:0008134)                                    | 559  | 226  | 144.28  | + | 1.57 | 2.82E-07  |
| transcription factor activity, transcription factor binding (GO:0000989)     | 451  | 182  | 116.41  | + | 1.56 | 2.01E-05  |
| actin binding (GO:0003779)                                                   | 367  | 148  | 94.72   | + | 1.56 | 4.94E-04  |
| enzyme regulator activity (GO:0030234)                                       | 854  | 344  | 220.42  | + | 1.56 | 5.93E-12  |
| transcription factor activity, protein binding (GO:0000988)                  | 452  | 182  | 116.66  | + | 1.56 | 2.34E-05  |
| molecular function regulator (GO:0098772)                                    | 1156 | 465  | 298.37  | + | 1.56 | 6.61E-17  |
| tubulin binding (GO:0015631)                                                 | 279  | 112  | 72.01   | + | 1.56 | 1.69E-02  |
| protein dimerization activity (GO:0046983)                                   | 1243 | 497  | 320.82  | + | 1.55 | 9.08E-18  |
| transcription cofactor activity (GO:0003712)                                 | 401  | 160  | 103.50  | + | 1.55 | 3.07E-04  |
| gated channel activity (GO:0022836)                                          | 302  | 120  | 77.95   | + | 1.54 | 1.29E-02  |
| transferase activity (GO:0016740)                                            | 2243 | 889  | 578.93  | + | 1.54 | 1.60E-33  |
| protein complex binding (GO:0032403)                                         | 857  | 338  | 221.20  | + | 1.53 | 1.47E-10  |
| protein binding (GO:0005515)                                                 | 6478 | 2546 | 1672.01 | + | 1.52 | 3.33E-124 |
| purine nucleotide binding (GO:0017076)                                       | 1786 | 701  | 460.98  | + | 1.52 | 2.66E-24  |
| zinc ion binding (GO:0008270)                                                | 1072 | 420  | 276.69  | + | 1.52 | 3.07E-13  |
| purine ribonucleotide binding (GO:0032555)                                   | 1776 | 695  | 458.39  | + | 1.52 | 1.00E-23  |
| ribonucleotide binding (GO:0032553)                                          | 1792 | 700  | 462.52  | + | 1.51 | 1.01E-23  |
| nucleoside binding (GO:0001882)                                              | 1750 | 683  | 451.68  | + | 1.51 | 5.89E-23  |
| ribonucleoside binding (GO:0032549)                                          | 1743 | 679  | 449.88  | + | 1.51 | 1.35E-22  |
| purine ribonucleoside triphosphate binding (GO:0035639)                      | 1732 | 674  | 447.04  | + | 1.51 | 2.73E-22  |
| purine ribonucleoside binding (GO:0032550)                                   | 1740 | 677  | 449.10  | + | 1.51 | 2.18E-22  |
| purine nucleoside binding (GO:0001883)                                       | 1743 | 678  | 449.88  | + | 1.51 | 2.12E-22  |
| inorganic cation transmembrane transporter activity (GO:0022890)             | 494  | 192  | 127.50  | + | 1.51 | 1.10E-04  |
| macromolecular complex binding (GO:0044877)                                  | 1408 | 547  | 363.41  | + | 1.51 | 2.52E-17  |

|                                                                                                                              |      |      |         |   |      |          |
|------------------------------------------------------------------------------------------------------------------------------|------|------|---------|---|------|----------|
| adenyl nucleotide binding (GO:0030554)                                                                                       | 1428 | 552  | 368.57  | + | 1.50 | 4.43E-17 |
| poly(A) RNA binding (GO:0044822)                                                                                             | 1181 | 455  | 304.82  | + | 1.49 | 2.29E-13 |
| adenyl ribonucleotide binding (GO:0032559)                                                                                   | 1420 | 547  | 366.51  | + | 1.49 | 1.32E-16 |
| substrate-specific transporter activity (GO:0022892)                                                                         | 1050 | 404  | 271.01  | + | 1.49 | 1.63E-11 |
| hydrolase activity, acting on ester bonds (GO:0016788)                                                                       | 726  | 279  | 187.38  | + | 1.49 | 3.13E-07 |
| substrate-specific transmembrane transporter activity (GO:0022891)                                                           | 885  | 340  | 228.42  | + | 1.49 | 2.95E-09 |
| carbohydrate derivative binding (GO:0097367)                                                                                 | 2125 | 816  | 548.47  | + | 1.49 | 3.84E-26 |
| transcriptional activator activity, RNA polymerase II transcription regulatory region sequence-specific binding (GO:0001228) | 337  | 129  | 86.98   | + | 1.48 | 3.26E-02 |
| cation transmembrane transporter activity (GO:0008324)                                                                       | 578  | 221  | 149.18  | + | 1.48 | 3.83E-05 |
| ion transmembrane transporter activity (GO:0015075)                                                                          | 756  | 289  | 195.13  | + | 1.48 | 2.46E-07 |
| substrate-specific channel activity (GO:0022838)                                                                             | 411  | 157  | 106.08  | + | 1.48 | 4.57E-03 |
| ATP binding (GO:0005524)                                                                                                     | 1385 | 529  | 357.48  | + | 1.48 | 2.81E-15 |
| ion channel activity (GO:0005216)                                                                                            | 399  | 152  | 102.98  | + | 1.48 | 7.60E-03 |
| nucleotide binding (GO:0000166)                                                                                              | 2285 | 869  | 589.77  | + | 1.47 | 7.70E-27 |
| nucleoside phosphate binding (GO:1901265)                                                                                    | 2285 | 869  | 589.77  | + | 1.47 | 7.70E-27 |
| small molecule binding (GO:0036094)                                                                                          | 2465 | 936  | 636.23  | + | 1.47 | 4.32E-29 |
| transcription factor activity, RNA polymerase II core promoter proximal region sequence-specific binding (GO:0000982)        | 353  | 134  | 91.11   | + | 1.47 | 3.30E-02 |
| chromatin binding (GO:0003682)                                                                                               | 511  | 193  | 131.89  | + | 1.46 | 6.77E-04 |
| transmembrane transporter activity (GO:0022857)                                                                              | 977  | 368  | 252.17  | + | 1.46 | 3.99E-09 |
| transporter activity (GO:0005215)                                                                                            | 1231 | 463  | 317.73  | + | 1.46 | 5.50E-12 |
| regulatory region nucleic acid binding (GO:0001067)                                                                          | 787  | 296  | 203.13  | + | 1.46 | 7.35E-07 |
| RNA polymerase II transcription factor activity, sequence-specific DNA binding (GO:0000981)                                  | 631  | 237  | 162.86  | + | 1.46 | 4.82E-05 |
| transcription regulatory region DNA binding (GO:0044212)                                                                     | 781  | 293  | 201.58  | + | 1.45 | 1.16E-06 |
| regulatory region DNA binding (GO:0000975)                                                                                   | 784  | 294  | 202.35  | + | 1.45 | 1.13E-06 |
| passive transmembrane transporter activity (GO:0022803)                                                                      | 446  | 167  | 115.11  | + | 1.45 | 6.70E-03 |
| channel activity (GO:0015267)                                                                                                | 446  | 167  | 115.11  | + | 1.45 | 6.70E-03 |
| RNA polymerase II regulatory region DNA binding (GO:0001012)                                                                 | 563  | 210  | 145.31  | + | 1.45 | 4.90E-04 |
| transcription regulatory region sequence-specific DNA binding (GO:0000976)                                                   | 629  | 233  | 162.35  | + | 1.44 | 1.81E-04 |
| transition metal ion binding (GO:0046914)                                                                                    | 1375 | 509  | 354.89  | + | 1.43 | 2.87E-12 |
| RNA polymerase II regulatory region sequence-specific DNA binding (GO:0000977)                                               | 557  | 206  | 143.76  | + | 1.43 | 1.12E-03 |
| sequence-specific double-stranded DNA binding (GO:1990837)                                                                   | 655  | 242  | 169.06  | + | 1.43 | 1.25E-04 |
| double-stranded DNA binding (GO:0003690)                                                                                     | 739  | 271  | 190.74  | + | 1.42 | 3.79E-05 |
| metal ion binding (GO:0046872)                                                                                               | 3472 | 1270 | 896.14  | + | 1.42 | 1.19E-34 |
| ion binding (GO:0043167)                                                                                                     | 3686 | 1348 | 951.38  | + | 1.42 | 2.69E-37 |
| cation binding (GO:0043169)                                                                                                  | 3515 | 1283 | 907.24  | + | 1.41 | 1.10E-34 |
| hydrolase activity, acting on acid anhydrides, in phosphorus-containing anhydrides (GO:0016818)                              | 726  | 260  | 187.38  | + | 1.39 | 4.86E-04 |
| pyrophosphatase activity (GO:0016462)                                                                                        | 724  | 259  | 186.87  | + | 1.39 | 5.58E-04 |
| catalytic activity (GO:0003824)                                                                                              | 5653 | 2017 | 1459.07 | + | 1.38 | 2.94E-55 |
| RNA binding (GO:0003723)                                                                                                     | 1651 | 588  | 426.13  | + | 1.38 | 1.69E-11 |
| hydrolase activity, acting on acid anhydrides (GO:0016817)                                                                   | 733  | 260  | 189.19  | + | 1.37 | 1.01E-03 |
| nucleoside-triphosphatase activity (GO:0017111)                                                                              | 678  | 239  | 175.00  | + | 1.37 | 4.50E-03 |

|                                                                           |       |      |         |   |       |           |
|---------------------------------------------------------------------------|-------|------|---------|---|-------|-----------|
| sequence-specific DNA binding (GO:0043565)                                | 981   | 344  | 253.20  | + | 1.36  | 4.30E-05  |
| nucleic acid binding transcription factor activity (GO:0001071)           | 997   | 348  | 257.33  | + | 1.35  | 5.58E-05  |
| transcription factor activity, sequence-specific DNA binding (GO:0003700) | 997   | 348  | 257.33  | + | 1.35  | 5.58E-05  |
| heterocyclic compound binding (GO:1901363)                                | 5569  | 1940 | 1437.39 | + | 1.35  | 2.72E-45  |
| organic cyclic compound binding (GO:0097159)                              | 5646  | 1957 | 1457.26 | + | 1.34  | 2.09E-44  |
| binding (GO:0005488)                                                      | 12007 | 4104 | 3099.07 | + | 1.32  | 6.52E-145 |
| DNA binding (GO:0003677)                                                  | 1817  | 607  | 468.98  | + | 1.29  | 2.68E-07  |
| receptor binding (GO:0005102)                                             | 1545  | 516  | 398.77  | + | 1.29  | 7.91E-06  |
| hydrolase activity (GO:0016787)                                           | 2384  | 794  | 615.32  | + | 1.29  | 3.91E-10  |
| nucleic acid binding (GO:0003676)                                         | 3721  | 1226 | 960.41  | + | 1.28  | 2.65E-16  |
| molecular_function (GO:0003674)                                           | 16806 | 5127 | 4337.72 | + | 1.18  | 8.48E-118 |
| signal transducer activity (GO:0004871)                                   | 2687  | 417  | 693.53  | - | .60   | 1.26E-29  |
| Unclassified (UNCLASSIFIED)                                               | 6975  | 1011 | 1800.28 | - | .56   | 0.00E00   |
| receptor activity (GO:0004872)                                            | 2626  | 360  | 677.78  | - | .53   | 1.01E-41  |
| molecular transducer activity (GO:0060089)                                | 2626  | 360  | 677.78  | - | .53   | 1.01E-41  |
| signaling receptor activity (GO:0038023)                                  | 2424  | 304  | 625.65  | - | .49   | 4.32E-47  |
| transmembrane receptor activity (GO:0099600)                              | 2369  | 273  | 611.45  | - | .45   | 1.70E-54  |
| transmembrane signaling receptor activity (GO:0004888)                    | 2326  | 256  | 600.35  | - | .43   | 4.79E-58  |
| G-protein coupled receptor activity (GO:0004930)                          | 1955  | 141  | 504.60  | - | .28   | 1.73E-83  |
| pheromone receptor activity (GO:0016503)                                  | 102   | 2    | 26.33   | - | < 0.2 | 3.27E-06  |
| olfactory receptor activity (GO:0004984)                                  | 1389  | 25   | 358.51  | - | < 0.2 | 1.99E-118 |
| immunoglobulin receptor binding (GO:0034987)                              | 64    | 1    | 16.52   | - | < 0.2 | 2.87E-03  |
| odorant binding (GO:0005549)                                              | 369   | 5    | 95.24   | - | < 0.2 | 3.81E-31  |
